# Supplementary material for: Altered hepatic metabolism mediates sepsis preventive effects of reduced glucose supply in infected preterm newborns
Source: eLife. 2025 Feb 24;13:RP97830. doi: 10.7554/eLife.97830 (PMC11850001; doi:10.7554/eLife.97830)
Supplement: Figure 2—source data 1. [file elife-97830-fig2-data1.xlsx]

## Sheet: DEG_HighvslowLiver
									HIGH_SE	LOW_SE	HIGH_SE	LOW_SE	HIGH_SE	LOW_SE	LOW_SE	LOW_CON	HIGH_CON	LOW_CON	HIGH_CON	HIGH_SE	HIGH_SE	HIGH_SE	LOW_SE	HIGH_SE	HIGH_SE	LOW_SE	LOW_SE	HIGH_CON	LOW_SE	LOW_CON	HIGH_CON	LOW_SE	LOW_CON	LOW_SE	LOW_SE	HIGH_SE	HIGH_SE	HIGH_SE	HIGH_SE	LOW_SE	LOW_SE	LOW_CON	HIGH_CON	LOW_CON	HIGH_CON
ENSID	GeneName	GeneDescription	baseMean	log2FoldChange	lfcSE	stat	pvalue	padj	IAIPSliver1	IAIPSliver2	IAIPSliver3	IAIPSliver4	IAIPSliver5	IAIPSliver6	IAIPSliver7	IAIPSliver8	IAIPSliver9	IAIPSliver10	IAIPSliver11	IAIPSliver12	IAIPSliver13	IAIPSliver14	IAIPSliver15	IAIPSliver16	IAIPSliver17	IAIPSliver18	IAIPSliver19	IAIPSliver20	IAIPSliver21	IAIPSliver22	IAIPSliver23	IAIPSliver24	IAIPSliver25	IAIPSliver26	IAIPSliver27	IAIPSliver29	IAIPSliver30	IAIPSliver31	IAIPSliver32	IAIPSliver34	IAIPSliver35	IAIPSliver36	IAIPSliver37	IAIPSliver38	IAIPSliver39
ENSSSCG00000032374	SULT1B1	sulfotransferase family cytosolic 1B member 1	36.1804	-6.37437	0.791162	-8.05698	7.82034e-16	1.88481e-13	0	0	0	26.0745	2.10371	27.4304	48.7171	163.931	4.72274	35.9199	1.63158	0	0	0	1.74099	0	0	6.43281	93.4797	3.88319	37.1853	185.417	3.54299	119.835	186.467	17.9533	19.9648	0	0	0	0	13.0866	6.38759	237.062	0.695165	94.2431	0.765208
ENSSSCG00000045673		receptor transporter protein 3	13.9201	-6.31003	0.710488	-8.88126	6.61068e-19	3.10041e-16	0	6.41317	0	30.086	0	21.9443	28.4949	3.17285	0	6.95224	0	0	1.24441	1.15125	0	0	0	26.5353	30.7933	0	58.7137	25.5072	0	42.7981	21.5569	23.3392	8.78452	0	1.34351	1.76334	0	54.6556	15.969	73.2388	3.47582	27.111	0
ENSSSCG00000009805	HPD	4-hydroxyphenylpyruvate dioxygenase	6807.95	-5.26855	0.46329	-11.372	5.76401e-30	1.00023e-26	35.9396	3846.83	157.618	11023.5	902.492	9034	17481.2	5053.29	48.8016	3499.3	57.1053	39.8243	149.329	130.092	3351.4	395.26	559.98	4640.47	19827.6	148.532	20635.9	13300	86.2127	23222.2	7908.16	6810.57	6903.04	531.646	127.634	370.302	152.325	9098.23	11091	59020.8	31.9776	12190.9	30.6083
ENSSSCG00000024325	SGK2	serum/glucocorticoid regulated kinase 2	75.3803	-5.145	0.665426	-7.7319	1.05956e-14	1.8026e-12	0	4.27545	0	128.367	5.6099	72.1027	142.475	76.1484	38.569	307.057	4.89474	2.27567	3.73323	5.75626	1.74099	0.898319	0	32.164	90.1804	0	126.234	306.086	3.54299	243.338	314.731	24.2369	86.248	0	0	3.52668	2.44372	43.8784	31.9379	223.571	2.78066	451.85	8.41729
ENSSSCG00000034000		ovalbumin	9.02422	-5.10879	0.680657	-7.50568	6.11108e-14	8.9114e-12	0	9.61975	0	19.0544	0	18.8094	42.2828	2.11523	1.57425	0	0	2.27567	0	3.45376	10.4459	0	1.38609	10.4533	14.2969	0.970796	22.5069	19.6209	4.72398	78.2594	3.23354	28.7252	26.3536	0	0	0	0	6.15838	4.25839	1.92734	1.39033	0	0
ENSSSCG00000030033	ACSM4	acyl-CoA synthetase medium-chain family member 4	1378.71	-4.80068	0.4054	-11.8418	2.37171e-32	6.85937e-29	32.2535	449.991	29.1141	1375.93	46.9829	580.74	841.978	4893.59	619.466	5477.21	205.579	38.6865	87.1087	48.3526	1128.16	2.69496	27.7218	578.149	3220.1	111.642	1875.9	4308.75	52.5543	2794.1	2213.9	463.194	530.266	70.8113	100.764	83.7587	9.77487	1762.84	660.05	8850.33	91.7617	7251.55	96.4162
ENSSSCG00000007370	R3HDML	R3H domain containing like	9.031	-4.72405	0.715658	-6.60098	4.08444e-11	2.65458e-09	0	1.06886	0	10.0287	0	13.3233	5.51514	27.498	0	26.6503	0	0	2.48882	0	8.70493	0	1.38609	4.02051	26.3943	0	7.82849	50.0333	0	3.66841	19.4012	17.9533	4.79156	1.12399	0	0.88167	0	32.3315	6.38759	9.63668	1.39033	51.64	0
ENSSSCG00000017763	SLC13A2	solute carrier family 13 member 2	4.36364	-4.57168	0.74052	-6.17362	6.67458e-10	3.11355e-08	0	4.27545	1.00393	12.0344	0	6.2698	2.75757	3.17285	0.787123	12.7458	0	0	1.24441	1.15125	6.96394	0	0	2.4123	9.89785	0	7.82849	2.94313	0	13.4508	3.23354	0	0	0	0	0.88167	0	17.7053	28.7441	9.63668	0.695165	11.619	0
ENSSSCG00000010837	FAM177B	family with sequence similarity 177 member B	16.421	-4.56607	0.575967	-7.92765	2.23329e-15	4.66918e-13	0	20.3084	0	57.1633	2.80495	39.1863	86.4039	7.40332	0	2.31741	0	4.55135	1.24441	2.3025	12.1869	5.38992	5.54436	4.82461	29.6935	0	121.342	16.6778	2.36199	40.3525	7.54492	30.5205	12.7775	0	0	0	0.814573	26.1731	45.7777	7.70935	0	14.201	0
ENSSSCG00000031477	GLOD5	glyoxalase domain containing 5	40.9368	-4.40199	0.556882	-7.9047	2.68589e-15	5.35728e-13	7.37223	14.9641	7.02753	140.401	0.701237	68.9678	307.929	30.6709	3.93562	13.9045	0.81579	4.55135	2.48882	3.45376	13.9279	0.898319	5.54436	2.4123	81.3823	4.85398	54.7994	86.3319	1.181	95.3786	30.1797	52.0645	13.5761	4.49595	0	2.64501	0.814573	73.1307	36.1963	312.228	1.39033	30.984	3.06083
ENSSSCG00000009942	DAO	D-amino acid oxidase	183.858	-4.34556	0.415646	-10.455	1.39061e-25	1.72366e-22	4.60764	19.2395	6.0236	97.2779	31.5557	198.282	133.283	382.857	177.103	539.958	76.6843	11.3784	11.1997	6.90751	83.5673	3.59328	1.38609	107.75	570.776	30.0947	475.581	575.873	21.8484	210.322	833.175	160.682	95.0325	5.61994	6.71757	14.1067	8.9603	243.256	102.201	703.478	40.3195	791.384	20.6606
ENSSSCG00000000151		apolipoprotein L6	3.04678	-4.02928	1.09957	-3.66441	0.000247914	0.00169639	0	0	0	3.0086	0	1.56745	0	0	0	0	0	0	2.48882	0	0	0.898319	0	0.804101	18.6959	1.94159	13.6999	0.981044	0.590498	24.4561	0	20.6462	0	0	0	0	0	3.07919	0	0	2.08549	15.492	2.29562
ENSSSCG00000003225		CEA cell adhesion molecule 18	10.1862	-4.00831	0.666382	-6.01502	1.79859e-09	7.48464e-08	1.84306	0	0	8.02292	0	4.70235	7.35352	13.749	0.787123	12.7458	0.81579	0	0	0	5.22296	0	0	5.62871	16.4964	4.85398	29.3568	58.8627	0	7.33682	29.1019	6.28364	2.39578	0	0	3.52668	1.62915	12.3168	6.38759	86.7301	2.78066	42.603	5.35645
ENSSSCG00000032423	SPOCK1	SPARC (osteonectin), cwcv and kazal like domains proteoglycan 1	107.469	-3.99951	0.328683	-12.1683	4.58679e-34	1.98986e-30	7.37223	79.0958	27.1062	666.905	11.2198	275.088	284.949	21.1523	11.0197	4.63483	19.579	12.5162	19.9106	18.42	194.99	8.08487	24.9496	193.788	76.9833	49.5106	227.026	48.0712	23.0294	313.038	8.62277	149.012	273.119	38.2156	14.7787	19.3968	13.8477	234.018	394.966	44.3287	77.1633	32.275	58.1558
ENSSSCG00000014108	BHMT	betaine--homocysteine S-methyltransferase 2	5066.97	-3.98794	0.478162	-8.34015	7.41983e-17	2.29922e-14	272.772	2214.68	1063.17	17241.3	86.9534	8028.48	9303.13	5144.25	1534.89	10785.2	566.158	946.68	125.685	72.5289	5233.4	396.159	334.047	1297.82	11394.6	392.202	10966.7	23934.5	383.823	5951.38	15654.6	2998.19	2283.98	67.4393	1549.07	193.086	45.6161	7717.99	5820.15	20341.1	337.85	12440.1	358.117
ENSSSCG00000015002	ELMOD1	ELMO domain containing 1	15.1974	-3.77372	1.02256	-3.69045	0.000223854	0.00155755	0	6.41317	0	27.0774	1.40247	39.97	30.3333	5.28808	42.5047	66.0463	8.1579	2.27567	0	0	0	0.898319	0	0	68.1852	1.94159	0	2.94313	3.54299	0	3.23354	0	0	7.86792	0	1.76334	10.5894	2.30939	2.1292	115.64	22.9404	49.058	39.7908
ENSSSCG00000029694	SLC23A3	solute carrier family 23 member 3	18.1847	-3.73538	0.6877	-5.4317	5.58205e-08	1.4308e-06	0.921528	0	2.00787	6.01719	0	10.9722	12.8687	56.0537	8.65836	52.1418	5.71053	0	0	0	1.74099	3.59328	0	23.3189	24.1947	0	18.5927	118.706	0.590498	14.6736	129.342	8.97663	7.18733	0	0	0.88167	0	3.84899	1.0646	67.4568	0.695165	86.4971	6.12166
ENSSSCG00000032588	C3orf85	chromosome 3 open reading frame 85	3.95807	-3.63466	0.862237	-4.21539	2.49352e-05	0.000245713	0	0	0	1.00287	0	0	6.43433	13.749	2.36137	11.5871	0.81579	0	0	0	3.48197	0	0	2.4123	10.9976	0	6.84993	14.7157	0	2.44561	11.8563	0.897663	0.798593	0	1.34351	0	0	0	1.0646	44.3287	2.08549	6.45501	0.765208
ENSSSCG00000012380	P2RY4	pyrimidinergic receptor P2Y4	5.2033	-3.62439	0.722454	-5.01677	5.25462e-07	9.54456e-06	0	0	0	4.01146	0.701237	0.783725	6.43433	8.46093	0	17.3806	0	0	0	0	0	1.79664	0	8.84511	4.39904	1.94159	12.7213	16.6778	2.95249	20.7876	28.024	2.69299	5.59015	0	0	0.88167	0.814573	6.92818	4.25839	13.4914	0	21.947	0
ENSSSCG00000011846	SLC51A	solute carrier family 51 alpha subunit	103.039	-3.6239	0.546192	-6.63484	3.24847e-11	2.19341e-09	11.9799	172.087	55.2163	180.516	178.815	466.316	516.585	200.947	7.08411	93.8553	10.6053	7.96486	16.1773	2.3025	26.1148	0	0	36.9887	210.054	3.88319	137.977	264.882	5.31448	81.9278	234.971	121.184	30.3465	1.12399	4.03054	9.69838	6.51658	213.234	318.315	127.204	4.86615	46.476	6.88687
ENSSSCG00000012524		transcription elongation factor A like 5	219.626	-3.57677	0.51939	-6.88647	5.71922e-12	4.90751e-10	6.4507	106.886	41.1613	346.991	61.0076	610.522	554.272	102.589	108.623	368.469	5.71053	6.82702	18.6661	61.0164	19.1508	8.08487	4.15827	44.2256	354.123	11.6496	283.783	1460.78	14.1719	637.08	887.068	157.989	161.316	20.2318	21.4962	6.17169	8.14573	280.976	104.331	819.118	6.25648	410.538	6.12166
ENSSSCG00000043056		-	5.54695	-3.55862	0.647533	-5.49565	3.89268e-08	1.05382e-06	0	6.41317	3.0118	3.0086	1.40247	9.4047	11.9495	5.28808	0.787123	17.3806	1.63158	0	0	1.15125	0	0	0	6.43281	19.7957	4.85398	5.87137	8.8294	1.77149	12.228	18.3234	7.1813	3.99296	0	0	1.76334	0	9.23757	7.45218	15.4187	0	20.656	0
ENSSSCG00000010578	PITX3	paired like homeodomain 3	4.83616	-3.52508	0.708149	-4.97788	6.42857e-07	1.13529e-05	0	6.41317	1.00393	11.0315	0	7.83725	8.27271	1.05762	0	3.47612	2.44737	0	0	5.75626	0	0.898319	0	1.6082	8.79809	0	20.5498	9.81044	0	14.6736	9.70062	0.897663	15.9719	2.24798	0	0.88167	0	14.6261	14.9044	13.4914	0	2.582	0
ENSSSCG00000034388	CYP8B1	cytochrome P-450 8B1	50.8619	-3.52058	0.828406	-4.24983	2.13932e-05	0.000215459	12.9014	74.8203	0	81.2321	0	188.878	54.2322	3.17285	0	2.31741	0	2.27567	12.4441	2.3025	3.48197	0	9.70262	320.836	2.19952	0	195.712	78.4835	0.590498	85.5962	7.54492	140.035	178.086	178.714	16.1222	40.5568	7.33115	126.247	14.9044	40.4741	0.695165	0	0
ENSSSCG00000010060	UPB1	beta-ureidopropionase 1	197.227	-3.50288	0.441557	-7.93302	2.13888e-15	4.52635e-13	8.29375	10.6886	22.0865	117.335	7.71361	165.366	262.888	315.17	106.262	794.873	64.4474	13.654	9.95528	9.21002	69.6394	3.59328	11.0887	41.0092	152.867	1.94159	226.048	642.584	8.26697	233.555	471.019	63.7341	36.7353	13.4879	17.4657	21.1601	5.70201	207.845	45.7777	2116.22	10.4275	978.579	10.7129
ENSSSCG00000027232		family with sequence similarity 169 member B	14.357	-3.50135	0.585829	-5.97675	2.27636e-09	9.06001e-08	1.84306	2.13772	0	13.0372	0.701237	17.242	11.9495	8.46093	11.0197	26.6503	9.78948	0	0	1.15125	0	2.69496	0	4.82461	7.69833	0	40.121	57.8816	1.77149	17.1192	114.252	26.0322	15.1733	5.61994	1.34351	2.64501	1.62915	24.6335	19.1628	21.2007	6.95165	50.349	6.12166
ENSSSCG00000022390	RGN	regucalcin	3452.56	-3.48752	0.456935	-7.6324	2.30416e-14	3.66826e-12	152.052	1041.07	145.57	3400.72	645.839	2862.95	3583.92	4404.97	3926.17	12277.7	2840.58	629.224	214.038	109.369	1062	85.3403	116.431	206.654	7123.15	565.974	7323.55	15498.5	482.437	5820.54	17580.8	1834.82	1400.73	153.986	295.573	477.865	74.1261	2893.67	1179.57	15852.3	476.883	10532	473.664
ENSSSCG00000021557	SULT1A3	sulfotransferase family 1A member 3	878.597	-3.46501	0.242237	-14.3042	2.05976e-46	3.5743e-42	144.68	2679.64	94.3697	2778.94	145.857	2144.27	1570.9	511.886	24.4008	527.212	14.6842	240.084	172.973	148.512	861.788	204.817	176.033	482.461	1722.23	36.8903	3542.39	1421.53	24.8009	3047.22	1139.28	1426.39	1066.92	161.854	200.184	204.548	208.531	2003.01	1448.92	1379.97	16.684	516.4	16.8346
ENSSSCG00000001823	UROC1	urocanate hydratase 1	768.432	-3.44795	0.489051	-7.05028	1.78554e-12	1.78071e-10	4.60764	49.1676	81.3186	317.908	84.8497	205.336	420.07	1384.42	239.286	2619.84	68.5264	52.3405	17.4217	58.7139	186.285	38.6277	12.4748	128.656	1482.48	93.1964	524.509	2538.94	23.0294	1050.39	2617.01	236.085	182.079	10.1159	16.1222	16.7517	14.6623	256.343	55.3591	6861.32	141.118	6190.35	152.276
ENSSSCG00000017636	LPO	lactoperoxidase	8.06219	-3.38344	0.612704	-5.52215	3.34877e-08	9.23866e-07	0	5.34431	0	3.0086	0	18.0257	25.7373	2.11523	0	2.31741	0	0	4.97764	0	12.1869	1.79664	0	8.04101	5.4988	0	8.80705	20.6019	1.181	3.66841	18.3234	42.1902	8.78452	1.12399	8.06108	7.05336	2.44372	23.8637	11.7106	42.4014	0	9.03701	0
ENSSSCG00000012236	OTC	ornithine carbamoyltransferase	660.223	-3.36822	0.419044	-8.03787	9.1411e-16	2.11501e-13	5.52917	40.6167	43.1691	299.857	10.5186	108.154	204.06	1940.73	309.339	2349.86	203.948	73.9594	39.8211	34.5376	600.64	6.28823	9.70262	63.524	1313.11	258.232	693.8	3012.79	83.2602	604.065	3693.78	147.217	59.8945	16.8598	41.6489	70.5336	74.9407	378.74	265.085	3916.35	178.657	3086.78	188.241
ENSSSCG00000046102		monoacylglycerol O-acyltransferase 1	137.747	-3.33716	0.409253	-8.15426	3.51324e-16	9.37927e-14	9.21528	33.1347	21.0826	114.327	42.7755	181.041	140.636	217.869	114.133	519.101	39.9737	11.3784	0	18.42	13.9279	28.7462	1.38609	83.6265	350.824	34.9487	231.919	446.375	40.7443	424.313	536.767	114.003	135.761	8.99191	2.68703	11.4617	19.5497	128.556	84.1032	443.287	33.3679	429.903	28.3127
ENSSSCG00000010334	SFTPD	surfactant protein D	5.19405	-3.31916	0.520303	-6.37928	1.77922e-10	9.73971e-09	0	6.41317	2.00787	27.0774	0.701237	10.9722	12.8687	3.17285	0	5.79354	0	3.41351	1.24441	3.45376	5.22296	0	0	7.23691	5.4988	0	4.89281	4.90522	0.590498	13.4508	5.38923	6.28364	14.3747	0	1.34351	0.88167	0.814573	16.1657	10.646	13.4914	0	3.873	0
ENSSSCG00000001473	COL11A2	collagen type XI alpha 2 chain	81.3442	-3.3036	0.674281	-4.89944	9.61083e-07	1.5929e-05	9.21528	2.13772	1.00393	3.0086	0.701237	0.783725	1.83838	1.05762	0.787123	16.2219	1.63158	0	1.24441	4.60501	137.538	0	5.54436	8.04101	235.349	9.70796	109.599	40.2228	1.181	86.819	3.23354	81.6873	31.1451	61.8194	13.4351	43.2019	30.1392	367.193	289.571	545.436	7.64681	837.86	19.1302
ENSSSCG00000046269		serum amyloid A-4 protein	795.822	-3.30124	0.476101	-6.9339	4.09393e-12	3.7001e-10	62.6639	1933.57	94.3697	3185.1	37.8668	2163.08	1004.68	882.052	26.7622	309.375	8.1579	269.667	283.725	359.191	1201.28	81.7471	116.431	1590.51	3224.5	22.3283	1452.18	774.044	7.67647	1957.71	277.007	1710.05	1171.54	579.978	52.397	187.796	27.6955	2432.56	1241.32	44.3287	0	671.321	0.765208
ENSSSCG00000006693	PDZK1	PDZ domain containing 1	200.381	-3.2594	0.407843	-7.99181	1.32974e-15	2.99676e-13	20.2736	34.2036	24.0944	180.516	58.2027	388.728	260.131	384.972	186.548	301.264	86.4738	23.8946	4.97764	17.2688	38.3017	23.3563	13.8609	438.235	80.2825	13.5911	492.216	736.764	42.5158	654.2	982.996	345.6	251.557	52.8274	21.4962	67.8886	43.9869	298.681	284.248	169.606	40.3195	299.512	50.5037
ENSSSCG00000011557	CIDEC	cell death inducing DFFA like effector c	165.29	-3.24376	0.278269	-11.6569	2.11602e-31	4.58991e-28	12.9014	71.6137	27.1062	333.954	52.5928	202.201	363.08	283.441	67.6926	186.552	36.7106	27.3081	17.4217	34.5376	83.5673	14.3731	20.7913	184.943	223.251	18.4451	259.319	356.119	31.2964	533.142	434.372	359.963	291.486	30.3477	16.1222	44.9652	50.5035	282.516	274.666	572.419	25.7211	254.327	35.9648
ENSSSCG00000006355	APOA2	apolipoprotein A2	13561.2	-3.24293	0.364184	-8.90467	5.35462e-19	2.7329e-16	695.754	7198.78	2349.2	15865.3	599.558	10122.6	13752	48590.1	4571.61	44490.9	3158.74	2921.97	1656.31	1967.49	30174.8	231.766	887.097	3501.86	25847.7	1828.98	10053.7	27286.8	661.357	12544.7	27558.4	6728.88	7259.21	1126.24	4281.78	864.037	266.365	20788.4	11050.5	90870.1	2785.52	54601.6	2624.66
ENSSSCG00000051671		-	2.58606	-3.23346	0.745022	-4.34008	1.4243e-05	0.000152568	0	2.13772	0	5.01433	0.701237	0	5.51514	6.3457	2.36137	3.47612	0.81579	0	0	0	1.74099	0	0	0.804101	5.4988	7.76637	1.95712	5.88627	4.72398	4.89121	2.15569	2.69299	3.99296	1.12399	0	0	0.814573	2.30939	2.1292	9.63668	1.39033	9.03701	0.765208
ENSSSCG00000009144	ETNPPL	ethanolamine-phosphate phospho-lyase	322.75	-3.22527	0.536122	-6.01594	1.78847e-09	7.46039e-08	37.7827	50.2365	62.2439	1763.04	0.701237	413.023	137.879	130.087	0	692.907	5.71053	2.27567	87.1087	185.352	517.073	82.6454	88.7097	234.798	547.681	6.79557	273.019	138.327	2.36199	517.246	284.551	764.809	487.94	106.779	128.977	35.2668	13.8477	1170.86	1029.47	1146.77	2.08549	788.802	4.59125
ENSSSCG00000008314	ATP6V1B1	ATPase H+ transporting V1 subunit B1	28.9022	-3.22103	0.432982	-7.43918	1.01311e-13	1.39527e-11	1.84306	11.7575	14.0551	37.106	3.50619	32.1327	74.4544	16.9219	23.6137	111.236	18.7632	3.41351	1.24441	4.60501	0	0.898319	5.54436	14.4738	23.095	2.91239	40.121	58.8627	5.90498	90.4874	56.048	25.1346	30.3465	2.24798	6.71757	6.17169	2.44372	51.5764	51.1007	79.0208	10.4275	142.01	9.18249
ENSSSCG00000012308	DGKK	diacylglycerol kinase kappa	126.733	-3.21232	0.350359	-9.16864	4.7901e-20	2.8663e-17	11.0583	68.4071	27.1062	154.441	50.4891	281.357	327.232	227.388	138.534	103.125	49.7632	13.654	7.46646	24.1763	31.3377	3.59328	19.4052	126.244	305.734	42.715	309.225	422.83	23.0294	300.809	203.713	105.027	155.726	29.2237	13.4351	37.0302	12.2186	120.088	114.977	476.052	54.918	247.872	49.7385
ENSSSCG00000029744	PLCH2	phospholipase C eta 2	3.18077	-3.17214	0.78209	-4.05598	4.99256e-05	0.00044202	0	5.34431	2.00787	18.0516	3.50619	2.35118	7.35352	1.05762	5.50986	2.31741	5.71053	0	0	0	0	0	0	4.82461	0	0.970796	0.978561	2.94313	0	0	6.46708	5.38598	1.59719	0	0	0	0.814573	13.0866	7.45218	13.4914	4.17099	0	2.29562
ENSSSCG00000033214	GNMT	glycine N-methyltransferase	454.769	-3.16428	0.401261	-7.88584	3.12431e-15	6.16092e-13	15.666	189.189	80.3147	728.08	80.6423	329.948	458.676	465.351	65.3312	1747.33	56.2895	110.37	39.8211	25.3276	149.725	61.984	63.7601	84.4306	1991.67	67.9557	704.564	830.945	19.4864	731.236	782.516	147.217	233.189	96.663	41.6489	62.5986	12.2186	362.575	575.947	3650.37	22.2453	1710.58	30.6083
ENSSSCG00000036808	HMGCS2	hydroxymethylglutaryl-CoA synthase, mitochondrial-like	19.1713	-3.16177	0.714741	-4.42365	9.70457e-06	0.000110356	1.84306	4.27545	1.00393	11.0315	1.40247	0	7.35352	61.3418	0	117.029	0	1.13784	1.24441	1.15125	6.96394	0	0	0	17.5962	3.88319	4.89281	69.6541	0	56.2489	199.402	6.28364	2.39578	0	0	0	0.814573	3.07919	1.0646	44.3287	0	83.9151	0
ENSSSCG00000017262	SLC16A6	solute carrier family 16 member 6	468.917	-3.10438	0.291119	-10.6636	1.50624e-26	2.17815e-23	30.4104	218.048	113.444	1174.36	96.7707	858.179	688.474	375.454	73.9896	827.317	22.8421	29.5838	124.441	72.5289	436.987	135.646	58.2157	202.634	1296.62	34.9487	604.751	1237.1	31.2964	967.237	1697.61	790.841	380.929	114.647	91.3589	132.251	131.961	1044.61	1482.98	886.575	41.7099	813.331	29.8431
ENSSSCG00000038215		collagen alpha-4(VI) chain-like	9.84837	-3.09072	0.618728	-4.99528	5.87506e-07	1.0532e-05	6.4507	29.9281	0	3.0086	0.701237	14.1071	18.3838	7.40332	5.50986	8.11095	2.44737	1.13784	2.48882	0	0	0.898319	0	4.82461	32.9928	0	39.1424	56.9006	2.36199	37.9069	28.024	15.2603	15.9719	2.24798	0	2.64501	0.814573	6.92818	1.0646	11.564	0	5.164	0
ENSSSCG00000038889		uncharacterized LOC100627836	2.78361	-3.0844	0.78125	-3.94803	7.87977e-05	0.000644381	0	2.13772	0	7.02006	1.40247	4.70235	3.67676	3.17285	4.72274	8.11095	0	0	0	0	8.70493	0	0	0	0	0.970796	0.978561	0.981044	0	2.44561	8.62277	0.897663	1.59719	1.12399	1.34351	0	0.814573	13.0866	1.0646	5.78201	2.08549	16.783	0.765208
ENSSSCG00000009619	SFTPC	surfactant protein C	2.68725	-3.07871	1.13127	-2.72146	0.00649935	0.0242128	0.921528	1.06886	2.00787	1.00287	0	0.783725	0.91919	0	0	3.47612	4.07895	0	0	0	0	0.898319	0	9.64921	0	7.76637	0	1.96209	1.77149	0	1.07785	0	2.39578	1.12399	0	0	0	53.8858	0	0	0	3.873	0.765208
ENSSSCG00000006825	GPR61	G protein-coupled receptor 61	1.15171	-3.07737	1.06202	-2.89766	0.00375954	0.0155184	0	0	0	2.00573	0	0.783725	5.51514	1.05762	0	0	0	0	0	0	0	0	0	0.804101	0	0	1.95712	2.94313	0	11.0052	3.23354	2.69299	1.59719	0	0	0.88167	0.814573	1.53959	0	5.78201	0	0	0
ENSSSCG00000007642		alpha-2-glycoprotein 1, zinc-binding	1149.97	-3.07388	0.413419	-7.43527	1.04357e-13	1.41477e-11	288.438	441.44	97.3815	1517.33	249.64	2529.86	1473.46	199.89	61.3956	278.09	70.158	161.573	369.59	95.5539	376.053	423.108	1291.83	1767.41	4838.95	143.678	2117.61	1084.05	79.7172	6257.08	86.2277	1796.22	2704.03	101.159	330.504	136.659	104.265	3624.21	3554.69	2804.27	70.9068	941.14	81.112
ENSSSCG00000036227		-	1.12232	-3.06891	0.886694	-3.46107	0.000538025	0.0032031	0	0	0	2.00573	0	0.783725	0.91919	2.11523	0	2.31741	0	0	0	0	0	0	0	0	3.29928	0	4.89281	1.96209	0	2.44561	4.31139	0.897663	1.59719	0	0	0	0	1.53959	2.1292	3.85467	0	6.45501	0
ENSSSCG00000040025	NANOS1	nanos C2HC-type zinc finger 1	42.0403	-3.05188	0.437288	-6.97911	2.97062e-12	2.75664e-10	1.84306	82.3023	6.0236	118.338	9.81732	44.6723	44.1211	10.5762	11.0197	68.3637	2.44737	9.1027	21.155	5.75626	62.6755	16.1697	11.0887	40.2051	16.4964	2.91239	42.0781	171.683	3.54299	48.9121	144.431	78.0967	99.0255	4.49595	12.0916	12.3434	3.25829	66.2026	238.47	32.7647	1.39033	11.619	0
ENSSSCG00000033735		PPARGC1 and ESRR induced regulator, muscle 1	0.963422	-3.0488	1.07407	-2.83855	0.00453188	0.0180994	0	1.06886	0	2.00573	0	1.56745	1.83838	0	0	1.15871	0.81579	0	0	0	0	0	0	0.804101	0	0	6.84993	0.981044	0	4.89121	0	0	0.798593	0	0	0.88167	0.814573	5.38858	0	5.78201	0	0	0
ENSSSCG00000026146	GALNT5	polypeptide N-acetylgalactosaminyltransferase 5	18.1335	-3.04605	0.416596	-7.31178	2.63627e-13	3.26765e-11	4.60764	13.8952	0	38.1089	4.20742	72.8864	17.4646	10.5762	12.594	12.7458	0.81579	1.13784	2.48882	9.21002	12.1869	10.7798	4.15827	57.8953	7.69833	6.79557	28.3783	29.4313	4.72398	35.4613	16.1677	74.506	28.7493	3.37196	4.03054	7.05336	4.07286	42.3389	58.5529	19.2734	4.86615	1.291	8.41729
ENSSSCG00000034686	TAFA2	TAFA chemokine like family member 2	19.0775	-3.02555	0.454552	-6.65611	2.81175e-11	1.95953e-09	0.921528	6.41317	4.01573	18.0516	4.20742	23.5118	29.4141	42.3047	28.3364	50.9831	9.78948	2.27567	1.24441	1.15125	15.6689	1.79664	0	11.2574	41.7909	0	35.2282	81.4267	4.72398	28.1245	75.4492	14.3626	7.18733	0	5.37406	5.29002	2.44372	16.9355	6.38759	53.9654	18.0743	51.64	6.12166
ENSSSCG00000039332	SEC16B	SEC16 homolog B, endoplasmic reticulum export factor	545.616	-3.00831	0.350149	-8.59151	8.58316e-18	3.4638e-15	22.1167	109.024	120.472	597.708	119.21	683.408	585.524	1491.24	476.997	2240.94	159.079	119.473	58.4872	118.579	165.394	41.3227	12.4748	426.174	1032.68	63.1018	797.527	1784.52	21.8484	844.957	1610.3	569.118	451.205	43.8355	41.6489	81.9954	53.7618	611.989	348.123	1368.41	187.694	2523.91	203.545
ENSSSCG00000022083	ANKS1B	ankyrin repeat and sterile alpha motif domain containing 1B	30.8172	-2.99949	0.488979	-6.1342	8.55914e-10	3.86789e-08	5.52917	22.4461	8.03147	53.1519	4.20742	44.6723	101.111	7.40332	43.2918	60.2528	7.34211	6.82702	29.8658	2.3025	55.7115	2.69496	0	5.62871	78.083	5.82478	25.4426	80.4456	5.31448	53.8033	62.5151	50.2691	7.98593	5.61994	8.06108	2.64501	0	101.613	55.3591	79.0208	9.03714	42.603	6.12166
ENSSSCG00000014311	SLC25A48	solute carrier family 25 member 48	34.8108	-2.9371	0.416814	-7.04655	1.83408e-12	1.81868e-10	6.4507	36.3413	2.00787	65.1862	11.2198	67.4004	89.1615	37.0166	39.3562	218.996	8.1579	10.2405	0	4.60501	8.70493	2.69496	4.15827	5.62871	39.5914	19.4159	48.9281	84.3698	17.1244	67.2542	92.6948	20.6462	30.3465	0	8.06108	4.40835	6.51658	25.4033	48.9715	84.8028	3.47582	67.1321	1.53042
ENSSSCG00000031694	DIRAS2	DIRAS family GTPase 2	67.6645	-2.92807	0.344665	-8.49541	1.9723e-17	7.13029e-15	8.29375	22.4461	7.02753	46.1318	9.81732	22.728	42.2828	90.955	13.3811	393.961	3.26316	10.2405	4.97764	10.3613	36.5607	2.69496	6.93044	32.164	103.378	36.8903	43.0567	233.489	6.49547	129.617	347.067	52.9621	41.5268	14.6118	4.03054	2.64501	12.2186	91.6059	133.075	165.751	14.5985	295.639	10.7129
ENSSSCG00000009179	MTTP	microsomal triglyceride transfer protein	2009.15	-2.92175	0.303651	-9.62205	6.45347e-22	5.59936e-19	131.779	499.158	607.38	2224.35	1256.62	2606.67	2565.46	4064.42	2037.86	3170.22	938.159	232.119	192.883	451.291	1439.79	242.546	148.312	2822.4	4584.9	1091.18	3686.24	7252.86	889.289	3950.88	7218.34	2057.44	1742.53	139.375	189.435	222.181	166.173	2204.7	1886.47	5637.46	1183.17	3399.21	1205.2
ENSSSCG00000024109	BDH1	3-hydroxybutyrate dehydrogenase 1	223.498	-2.90896	0.540897	-5.37802	7.53094e-08	1.84844e-06	28.5674	148.572	15.059	109.312	140.247	444.372	185.676	389.203	86.5836	341.819	21.2105	3.41351	37.3323	12.6638	33.0787	21.5597	9.70262	240.426	313.432	1.94159	955.076	843.698	11.81	805.827	1270.78	208.258	174.892	151.738	25.5268	64.3619	25.2518	271.738	287.441	210.08	6.25648	367.935	4.59125
ENSSSCG00000012306	AKAP4	A-kinase anchoring protein 4	1.38559	-2.89706	0.961397	-3.01339	0.00258348	0.0114952	0	4.27545	0	2.00573	0	10.1884	11.9495	0	0	0	0	2.27567	0	0	0	0.898319	0	0	4.39904	0	0	1.96209	0	2.44561	1.07785	1.79533	0.798593	1.12399	0	0	0	3.07919	1.0646	1.92734	0	0	0
ENSSSCG00000047899		-	1.55323	-2.88784	1.13512	-2.54408	0.0109568	0.0368267	0	1.06886	1.00393	11.0315	0	0	3.67676	0	3.93562	4.63483	0.81579	0	0	0	8.70493	1.79664	0	0.804101	0	0	2.93568	0	1.77149	0	3.23354	8.97663	0	0	0	0	0	3.07919	0	0	0	0	0
ENSSSCG00000034472		-	1.32753	-2.866	0.999076	-2.86865	0.00412225	0.0167565	0	3.20658	1.00393	1.00287	0.701237	9.4047	0	0	0	3.47612	0.81579	0	0	0	0	0	0	8.84511	0	0	0.978561	3.92418	0	6.11401	1.07785	0.897663	3.19437	1.12399	0	0	0	0.769797	0	0	0	2.582	0
ENSSSCG00000006614	THEM5	thioesterase superfamily member 5	5.0282	-2.85676	0.976083	-2.92676	0.00342514	0.0143789	0	2.13772	1.00393	1.00287	0	3.1349	16.5454	26.4404	0	2.31741	0.81579	0	1.24441	1.15125	8.70493	0	9.70262	0.804101	47.2897	0	0	14.7157	0	0	6.46708	2.69299	0	0	0	0	0	6.15838	0	19.2734	0	12.91	1.53042
ENSSSCG00000043452		-	9.53246	-2.85675	0.701705	-4.07115	4.67812e-05	0.00041759	0.921528	0	0	3.0086	0	3.1349	2.75757	35.959	0.787123	17.3806	0	1.13784	0	0	5.22296	0.898319	0	0.804101	16.4964	0.970796	5.87137	35.3176	0	2.44561	46.3474	5.38598	0.798593	0	4.03054	0.88167	0	6.15838	0	79.0208	2.08549	74.8781	0
ENSSSCG00000027903		phylloquinone omega-hydroxylase CYP4F2-like	271.396	-2.85578	0.638344	-4.47373	7.68656e-06	9.09856e-05	4.60764	26.7215	9.0354	93.2665	57.5015	68.9678	50.5555	214.696	155.063	2216.61	58.7369	18.2054	9.95528	77.1339	24.3738	8.08487	2.77218	108.554	1145.95	31.0655	655.636	395.361	5.31448	377.846	1373.18	219.03	51.9085	143.87	8.06108	69.652	9.77487	369.503	46.8423	743.952	28.5017	1139.95	21.4258
ENSSSCG00000048559		-	17.0297	-2.83659	1.00228	-2.83012	0.00465303	0.0184896	0	4.27545	25.0983	105.301	9.11608	1.56745	44.1211	0	7.87123	149.473	1.63158	0	0	0	67.8984	4.4916	0	0	39.5914	21.3575	1.95712	6.86731	2.95249	2.44561	62.5151	53.8598	0	0	0	2.64501	0	3.07919	1.0646	3.85467	3.47582	1.291	2.29562
ENSSSCG00000003047		-	33.4487	-2.81745	0.34917	-8.06901	7.08701e-16	1.73213e-13	6.4507	29.9281	22.0865	87.2493	14.0247	48.591	38.606	46.5351	33.8463	120.506	16.3158	1.13784	6.22205	12.6638	17.4099	4.4916	2.77218	21.7107	105.577	25.2407	52.8423	67.6921	20.6674	37.9069	59.2815	25.1346	34.3395	0	1.34351	3.52668	3.25829	37.7201	45.7777	80.9481	11.1226	87.7881	6.88687
ENSSSCG00000021579		N-acetyltransferase 8 (putative)	64.0582	-2.80406	0.366997	-7.64057	2.16256e-14	3.48966e-12	7.37223	20.3084	9.0354	42.1203	13.3235	34.4839	81.8079	100.474	36.9948	134.41	29.3684	29.5838	22.3994	9.21002	43.5246	3.59328	4.15827	20.9066	194.658	8.73717	50.8852	130.479	9.44796	102.715	174.611	77.199	48.7142	6.74393	8.06108	23.8051	6.51658	258.652	120.3	325.72	25.7211	130.391	23.7214
ENSSSCG00000006834	MYBPHL	myosin binding protein H like	5.48169	-2.79036	0.542656	-5.14204	2.71776e-07	5.52887e-06	0	5.34431	0	8.02292	0	4.70235	9.1919	9.51855	3.14849	23.1741	3.26316	1.13784	2.48882	1.15125	1.74099	1.79664	0	5.62871	19.7957	2.91239	5.87137	13.7346	2.36199	11.0052	5.38923	4.48831	2.39578	5.61994	0	0	1.62915	10.7772	4.25839	7.70935	3.47582	14.201	6.88687
ENSSSCG00000003491	AKR7A2	aldo-keto reductase family 7 member A2	163.356	-2.78721	0.539627	-5.16507	2.40344e-07	4.9533e-06	23.9597	242.632	4.01573	106.304	143.754	262.548	187.515	203.062	72.4153	220.154	12.2369	13.654	17.4217	8.05877	19.1508	20.6613	2.77218	298.322	65.9857	17.4743	661.507	569.987	19.4864	741.019	607.905	240.574	309.055	113.523	8.06108	56.4269	74.1261	230.169	243.793	129.132	7.64681	73.5871	16.0694
ENSSSCG00000038184	ACBD7	acyl-CoA binding domain containing 7	6.09656	-2.76107	0.758554	-3.63991	0.000272733	0.00182169	0.921528	2.13772	0	1.00287	1.40247	4.70235	4.59595	11.6338	8.65836	8.11095	1.63158	0	0	0	1.74099	0	0	1.6082	12.0974	0.970796	1.95712	35.3176	2.95249	7.33682	58.2037	0.897663	2.39578	1.12399	0	0	0.814573	2.30939	0	34.6921	1.39033	14.201	0.765208
ENSSSCG00000037478		proline rich 29	65.5977	-2.72967	0.40026	-6.81975	9.1197e-12	7.25936e-10	14.7445	52.3742	19.0747	266.762	4.90866	109.722	100.192	69.8027	1.57425	62.5702	3.26316	4.55135	24.8882	65.6214	69.6394	32.3395	0	51.4625	149.567	7.76637	148.741	240.356	15.3529	210.322	88.3834	65.5294	65.4846	13.4879	32.2443	7.93503	6.51658	181.672	96.8784	63.6021	2.08549	76.1691	1.53042
ENSSSCG00000048885		-	3.74256	-2.72763	0.634806	-4.29679	1.7329e-05	0.000180498	0.921528	3.20658	0	3.0086	0.701237	10.1884	3.67676	2.11523	2.36137	12.7458	2.44737	0	2.48882	0	0	0	1.38609	4.02051	0	0	6.84993	7.84835	0	7.33682	7.54492	8.97663	3.19437	0	0	3.52668	0.814573	5.38858	6.38759	11.564	0.695165	16.783	2.29562
ENSSSCG00000009182		alcohol dehydrogenase 1C (class I), gamma polypeptide	4457.58	-2.72643	0.410982	-6.63393	3.26855e-11	2.19372e-09	408.237	880.742	822.222	9291.55	572.21	6574.67	5391.05	3819.05	1297.18	6557.13	500.895	2217.64	452.965	1002.74	1552.96	2696.75	640.373	5603.78	20718.4	134.941	10484.3	19699.4	229.113	11916.2	15353.9	10933.5	3786.93	749.7	513.222	1251.97	254.961	5014.46	3940.08	3022.06	48.6615	6545.38	51.2689
ENSSSCG00000029515	PON3	paraoxonase 3	2.29378	-2.71666	0.907672	-2.99299	0.00276256	0.0121007	0	3.20658	0	0	0.701237	3.1349	4.59595	2.11523	0	5.79354	0	0	0	0	0	1.79664	0	5.62871	7.69833	0	4.89281	4.90522	0	2.44561	9.70062	2.69299	0	1.12399	0	0	0	0	0	19.2734	0	5.164	0
ENSSSCG00000003889		-	4.27199	-2.70064	0.733127	-3.68373	0.000229847	0.00159287	5.52917	0	2.00787	7.02006	2.10371	7.05353	6.43433	3.17285	8.65836	10.4284	4.07895	0	0	0	0	0	0	9.64921	3.29928	0.970796	0	1.96209	1.181	11.0052	1.07785	0.897663	3.99296	0	0	0.88167	1.62915	1.53959	7.45218	1.92734	11.1226	32.275	10.7129
ENSSSCG00000009667		gulonolactone (L-) oxidase	1806.63	-2.69009	0.338808	-7.93988	2.02382e-15	4.38992e-13	216.559	224.461	360.412	2106.02	736.299	1549.42	1701.42	4411.32	3714.44	7109.83	1545.92	241.221	187.906	353.434	562.338	40.4244	36.0383	923.108	1511.07	824.206	1400.32	5727.34	926.491	2499.41	9202.65	1759.42	1414.31	143.87	210.932	203.666	193.054	2819.77	779.285	5623.97	572.12	4341.64	671.087
ENSSSCG00000050539		-	1.735	-2.68725	0.774854	-3.46807	0.00052422	0.00314116	1.84306	2.13772	0	4.01146	0	3.1349	1.83838	1.05762	0	5.79354	1.63158	1.13784	2.48882	0	3.48197	0	0	1.6082	0	0	1.95712	0.981044	0	8.55962	3.23354	2.69299	3.19437	0	0	0	0	4.61878	1.0646	3.85467	0	3.873	0
ENSSSCG00000039813	COL25A1	collagen type XXV alpha 1 chain	5.06176	-2.67775	0.650351	-4.11739	3.83192e-05	0.0003522	0	7.48203	4.01573	15.043	0	6.2698	0.91919	10.5762	0.787123	1.15871	0	2.27567	6.22205	1.15125	34.8197	0.898319	0	9.64921	0	0	1.95712	2.94313	0.590498	11.0052	1.07785	14.3626	20.7634	1.12399	1.34351	3.52668	0	14.6261	7.45218	3.85467	1.39033	0	0
ENSSSCG00000004891	SERPINB7	serpin family B member 7	16.2792	-2.66071	0.459418	-5.79149	6.97663e-09	2.39734e-07	0.921528	18.1706	2.00787	25.0716	9.81732	33.7002	20.2222	45.4775	7.87123	54.4592	0	5.68918	0	2.3025	0	1.79664	0	12.0615	18.6959	1.94159	27.3997	61.8058	10.0385	22.0105	109.94	26.9299	8.78452	1.12399	1.34351	1.76334	3.25829	12.3168	13.8398	21.2007	0	18.074	2.29562
ENSSSCG00000037446	INHBC	inhibin subunit beta C	116.253	-2.65833	0.325945	-8.15575	3.47011e-16	9.37927e-14	16.5875	21.3772	23.0905	328.94	59.6052	146.557	172.808	80.3789	71.6282	79.9508	60.3685	40.9621	37.3323	10.3613	280.299	12.5765	19.4052	128.656	152.867	40.7734	250.512	237.413	25.3914	231.11	189.701	194.793	136.559	24.7277	60.4581	82.877	21.1789	404.913	146.914	331.502	41.0147	107.153	30.6083
ENSSSCG00000003147	CA11	carbonic anhydrase 11	58.5454	-2.65004	0.405476	-6.53563	6.33406e-11	3.84318e-09	2.76458	17.1018	35.1377	74.212	30.1532	34.4839	117.656	118.453	17.3167	81.1095	20.3948	7.96486	4.97764	3.45376	60.9345	7.18655	18.0192	29.7517	64.8859	24.2699	53.8209	100.067	7.08597	123.503	64.6708	82.585	59.0959	0	8.06108	9.69838	11.404	107.772	42.5839	528.09	47.2712	105.862	44.382
ENSSSCG00000008013	IGFALS	insulin like growth factor binding protein acid labile subunit	178.746	-2.64624	0.274644	-9.63517	5.67979e-22	5.18744e-19	24.8813	119.713	29.1141	411.175	28.7507	297.032	292.303	129.029	84.2222	287.359	57.1053	103.543	42.3099	46.0501	295.967	24.2546	23.5635	124.636	162.765	56.3062	336.625	474.825	14.7624	282.467	212.336	262.118	402.491	122.515	71.2062	84.6404	35.0266	544.247	349.188	398.959	46.576	282.729	52.7993
ENSSSCG00000032674	TCEA3	transcription elongation factor A3	352.646	-2.63908	0.251254	-10.5036	8.31081e-26	1.10936e-22	80.173	165.674	63.2478	529.513	85.5509	397.349	448.565	494.965	783.188	428.722	255.342	67.1324	42.3099	120.881	471.807	65.5773	56.8296	351.392	278.239	184.451	433.503	706.352	127.547	738.573	637.007	549.37	398.498	57.3234	104.794	178.979	74.1261	1043.85	569.56	1004.14	262.077	573.204	218.084
ENSSSCG00000008215	SMYD1	SET and MYND domain containing 1	4.53135	-2.6258	0.784069	-3.34894	0.000811216	0.00454684	0	1.06886	0	1.00287	0	4.70235	2.75757	0	0.787123	1.15871	2.44737	0	1.24441	0	3.48197	0.898319	0	16.082	1.09976	0	13.6999	29.4313	0	0	36.6468	1.79533	13.5761	1.12399	4.03054	2.64501	3.25829	0.769797	6.38759	7.70935	1.39033	3.873	4.59125
ENSSSCG00000014039	RGS14	regulator of G protein signaling 14	122.331	-2.6022	0.214953	-12.1059	9.82991e-34	3.41157e-30	26.7243	136.814	38.1495	233.668	57.5015	242.171	256.454	230.56	92.0934	266.503	75.8685	17.0676	14.9329	34.5376	64.4165	18.8647	37.4244	83.6265	277.14	49.5106	297.483	251.147	51.9638	204.208	170.3	174.147	151.733	38.2156	28.2138	27.3318	39.0995	229.4	144.785	183.097	27.8066	210.433	42.8516
ENSSSCG00000007858		acyl-CoA synthetase medium chain family member 2B	845.327	-2.6014	0.301538	-8.6271	6.29292e-18	2.66344e-15	129.014	457.473	157.618	1450.14	218.085	782.941	648.029	1519.79	813.098	779.81	259.421	296.975	110.752	138.15	349.938	95.2218	44.3548	1241.53	2247.91	338.808	1666.49	3347.32	354.889	2231.62	1191.02	812.385	902.41	316.965	204.214	599.536	360.856	1720.5	880.422	2004.43	545.704	1542.75	516.515
ENSSSCG00000010577	ELOVL3	ELOVL fatty acid elongase 3	11.6163	-2.59969	0.55074	-4.72035	2.35437e-06	3.41315e-05	0.921528	14.9641	6.0236	15.043	3.50619	15.6745	25.7373	2.11523	0.787123	2.31741	2.44737	1.13784	2.48882	1.15125	3.48197	14.3731	13.8609	5.62871	25.2945	0	70.4564	13.7346	1.77149	61.1401	1.07785	22.4416	15.9719	1.12399	0	0	3.25829	7.69797	30.8733	34.6921	1.39033	6.45501	0.765208
ENSSSCG00000027179	SIM2	SIM bHLH transcription factor 2	0.980316	-2.59837	0.890857	-2.9167	0.00353753	0.0147529	0	1.06886	0	3.0086	0.701237	3.91863	0	1.05762	2.36137	0	0.81579	0	0	0	1.74099	0	2.77218	4.82461	1.09976	0.970796	1.95712	0	1.77149	0	0	1.79533	0.798593	0	0	0	0	3.84899	1.0646	0	0.695165	0	0
ENSSSCG00000010093	SERPIND1	serpin family D member 1	5969.21	-2.58356	0.347357	-7.43778	1.02389e-13	1.39902e-11	514.213	921.359	1005.94	4679.37	207.566	3450.74	5233.87	13338.7	4342.56	14475.7	2628.48	1355.16	1589.11	1987.06	6459.06	404.244	220.388	2401.85	8711.21	1695.01	10329.7	18268	882.203	9415.58	17671.3	6850.07	4107.16	1380.26	2239.64	1109.14	222.378	9501.61	4389.34	37698.7	1878.33	17633.8	1662.03
ENSSSCG00000008119	KCNIP3	potassium voltage-gated channel interacting protein 3	199.546	-2.57401	0.270194	-9.52655	1.62599e-21	1.22678e-18	87.5452	464.955	87.3422	521.49	112.198	264.899	285.868	209.408	85.0093	130.934	67.7106	20.4811	51.0208	81.7389	135.797	45.8143	26.3357	203.438	328.828	43.6858	821.991	310.991	20.6674	551.484	153.054	236.983	428.046	131.507	25.5268	78.4687	65.9804	294.063	381.126	273.682	72.2971	228.507	54.3297
ENSSSCG00000006213		alcohol dehydrogenase iron containing 1	40.7893	-2.56393	0.389253	-6.5868	4.49395e-11	2.86704e-09	4.60764	11.7575	2.00787	8.02292	7.71361	18.0257	25.7373	67.6875	21.2523	125.14	15.5	1.13784	3.73323	4.60501	20.8918	10.7798	6.93044	27.3394	117.674	6.79557	88.0705	129.498	8.85746	89.2646	122.874	15.2603	13.5761	11.2399	12.0916	6.17169	5.70201	33.8711	35.1317	248.626	9.7323	166.539	5.35645
ENSSSCG00000045555		-	6.25385	-2.56185	0.686242	-3.73316	0.000189095	0.00134925	0	2.13772	2.00787	11.0315	2.10371	7.83725	8.27271	7.40332	0.787123	12.7458	2.44737	0	0	0	55.7115	1.79664	1.38609	2.4123	0	0	0.978561	7.84835	1.77149	0	6.46708	2.69299	4.79156	2.24798	9.4046	1.76334	1.62915	5.38858	2.1292	21.2007	1.39033	41.312	2.29562
ENSSSCG00000032607	ALPL	alkaline phosphatase, biomineralization associated	987.729	-2.56131	0.43177	-5.93212	2.99051e-09	1.1481e-07	38.7042	1186.44	221.869	2418.91	291.715	856.612	608.504	72.9755	14.1682	320.962	29.3684	34.1351	431.81	942.876	2386.89	982.761	177.419	2031.16	466.299	21.3575	1990.39	321.783	20.0769	2829.57	99.1619	3042.18	4140.7	1299.33	224.367	119.026	109.153	4769.66	3163.98	641.803	6.25648	225.925	7.65208
ENSSSCG00000010006		SEC14 like lipid binding 2	1450.9	-2.55786	0.37189	-6.87799	6.07028e-12	5.14593e-10	219.324	1665.29	563.207	2754.87	337.996	2259.48	2570.98	1080.88	462.829	1738.06	302.658	220.74	434.299	316.594	1760.14	449.16	675.025	564.479	3401.56	158.24	3255.67	2825.41	66.7262	3296.68	2757.13	2816.87	908.798	160.73	485.009	846.404	154.769	2634.25	3358.81	6011.36	13.9033	2128.86	26.0171
ENSSSCG00000014933	NAALAD2	N-acetylated alpha-linked acidic dipeptidase 2	1.46519	-2.55677	0.881322	-2.90107	0.00371896	0.0153765	0	0	0	1.00287	0	0	3.67676	0	3.14849	1.15871	4.07895	0	0	0	1.74099	0	0	4.02051	4.39904	1.94159	0	0	4.13348	0	0	2.69299	1.59719	1.12399	0	0	2.44372	0.769797	2.1292	1.92734	3.47582	6.45501	2.29562
ENSSSCG00000036265		uncharacterized LOC102161637	27.8183	-2.54618	0.389778	-6.53239	6.47294e-11	3.91376e-09	1.84306	10.6886	15.059	67.192	8.41485	20.3769	34.9292	46.5351	8.65836	19.698	12.2369	1.13784	3.73323	10.3613	15.6689	5.38992	11.0887	24.9271	73.684	7.76637	59.6922	68.6731	0.590498	78.2594	40.9582	28.7252	37.5339	3.37196	6.71757	10.58	8.14573	28.4825	51.1007	163.824	2.78066	33.566	6.88687
ENSSSCG00000044363		-	16.8701	-2.54544	0.519416	-4.90058	9.55532e-07	1.58521e-05	5.52917	10.6886	2.00787	6.01719	3.50619	11.7559	5.51514	13.749	3.93562	34.7612	7.34211	0	7.46646	4.60501	20.8918	5.38992	1.38609	1.6082	25.2945	3.88319	28.3783	10.7915	3.54299	116.166	22.6348	68.2224	3.99296	0	6.71757	3.52668	6.51658	19.2449	4.25839	80.9481	7.64681	59.386	6.88687
ENSSSCG00000023478	SLC46A1	solute carrier family 46 member 1	484.848	-2.51721	0.213571	-11.7863	4.5928e-32	1.13855e-28	99.525	383.721	174.684	617.765	195.645	658.329	938.493	591.208	474.635	1101.93	239.027	73.9594	60.9761	101.31	329.046	85.3403	99.7984	266.157	988.685	365.019	701.628	915.314	141.719	796.045	804.073	512.566	474.364	137.127	107.481	149.884	114.855	707.444	801.642	2037.19	215.501	1235.49	241.806
ENSSSCG00000008754	GBA3	cytosolic beta-glucosidase	116.608	-2.50629	0.465737	-5.38133	7.39373e-08	1.82408e-06	14.7445	27.7904	28.1101	28.0802	33.6594	148.908	67.1009	266.519	204.652	310.534	57.1053	29.5838	2.48882	5.75626	29.5967	13.4748	0	29.7517	214.453	51.4522	162.441	586.665	36.0204	111.275	463.474	21.5439	37.5339	0	5.37406	26.4501	1.62915	49.267	59.6175	730.46	31.2824	396.337	31.3735
ENSSSCG00000003968	RIMKLA	ribosomal modification protein rimK like family member A	67.2754	-2.50503	0.48867	-5.12622	2.95612e-07	5.93721e-06	9.21528	11.7575	36.1416	141.404	15.4272	144.989	102.03	25.3828	17.3167	4.63483	4.89474	3.41351	17.4217	59.8651	250.702	20.6613	52.6714	8.04101	115.475	0	170.27	121.65	1.77149	81.9278	71.1379	168.761	25.555	23.6038	18.8092	12.3434	17.106	313.308	233.147	144.55	11.8178	29.693	2.29562
ENSSSCG00000014257	SLC27A6	solute carrier family 27 member 6	31.3139	-2.49867	0.356278	-7.01326	2.32828e-12	2.21993e-10	1.84306	12.8263	6.0236	80.2292	5.6099	34.4839	64.3433	51.8232	16.5296	18.5393	9.78948	5.68918	6.22205	12.6638	10.4459	9.88151	24.9496	83.6265	56.0878	4.85398	75.3492	69.6541	13.5814	62.3629	123.952	36.8042	67.8804	1.12399	6.71757	2.64501	11.404	20.7845	15.969	84.8028	5.56132	37.439	6.12166
ENSSSCG00000041272		-	3.09892	-2.49792	0.738039	-3.38453	0.00071299	0.00408738	0.921528	5.34431	0	0	0	0.783725	3.67676	2.11523	3.14849	4.63483	6.52632	0	0	0	3.48197	0	0	4.82461	5.4988	1.94159	0	4.90522	4.72398	3.66841	5.38923	0.897663	1.59719	3.37196	2.68703	0	0	0.769797	1.0646	15.4187	4.17099	11.619	11.4781
ENSSSCG00000041847		-	4.06184	-2.48845	0.706518	-3.52214	0.000428086	0.00265117	0	1.06886	3.0118	6.01719	0.701237	5.48608	0	1.05762	1.57425	6.95224	2.44737	0	0	0	0	0	0	19.2984	2.19952	0	3.91424	7.84835	2.36199	18.342	21.5569	5.38598	5.59015	1.12399	0	4.40835	4.07286	9.23757	1.0646	5.78201	2.08549	3.873	3.82604
ENSSSCG00000024024	CX3CR1	C-X3-C motif chemokine receptor 1	81.8765	-2.48809	0.673862	-3.69228	0.000222253	0.00154703	62.6639	22.4461	10.0393	31.0888	44.8792	22.728	78.1312	360.647	194.419	261.868	117.474	1.13784	0	2.3025	1.74099	1.79664	1.38609	2.4123	202.356	237.845	25.4426	78.4835	298.792	119.835	108.862	2.69299	10.3817	2.24798	0	3.52668	5.70201	13.8564	4.25839	186.952	120.263	253.036	137.737
ENSSSCG00000039573	SLPI	secretory leukocyte peptidase inhibitor	70.5085	-2.48457	0.615225	-4.03847	5.38019e-05	0.000468217	10.1368	16.0329	16.0629	412.178	17.5309	55.6445	141.555	38.0742	57.46	33.6025	17.9474	5.68918	4.97764	72.5289	13.9279	154.511	19.4052	45.8338	72.5842	43.6858	67.5207	22.564	25.9819	643.194	23.7126	17.0556	274.716	5.61994	0	6.17169	6.51658	8.46777	60.6821	48.1834	66.0406	30.984	52.0341
ENSSSCG00000051024		-	1.75083	-2.48089	0.826931	-3.00012	0.0026987	0.0118769	0	0	0	1.00287	0.701237	0	1.83838	2.11523	0	2.31741	1.63158	0	0	0	0	0	0	0.804101	5.4988	0.970796	0.978561	6.86731	0	4.89121	3.23354	4.48831	0.798593	2.24798	1.34351	0	0	5.38858	0	11.564	0.695165	3.873	1.53042
ENSSSCG00000026532	DNASE2B	deoxyribonuclease 2 beta	1.01539	-2.47628	0.952011	-2.6011	0.00929254	0.0323542	0.921528	0	0	1.00287	0	0.783725	1.83838	0	0	1.15871	0	0	0	0	0	0	0	0.804101	7.69833	0	1.95712	2.94313	0	2.44561	1.07785	0.897663	0	0	1.34351	0.88167	0	2.30939	1.0646	0	0.695165	7.74601	0
ENSSSCG00000017914	GLTPD2	glycolipid transfer protein domain containing 2	87.9648	-2.45821	0.314907	-7.80614	5.89678e-15	1.08858e-12	9.21528	63.0628	9.0354	59.169	14.0247	81.5074	79.0504	164.988	42.5047	125.14	36.7106	26.1703	22.3994	5.75626	64.4165	11.6782	12.4748	89.2552	173.762	6.79557	209.412	350.233	14.1719	165.078	265.15	65.5294	67.8804	25.8517	22.8397	29.9768	17.9206	56.1952	50.0361	518.453	11.8178	280.147	6.88687
ENSSSCG00000002396	GSTZ1	glutathione S-transferase zeta 1	620.335	-2.45579	0.249206	-9.85448	6.55571e-23	6.69184e-20	98.6035	193.464	127.5	729.083	117.808	417.726	571.736	1432.01	191.271	1578.16	159.079	120.611	126.93	86.3439	409.132	89.8319	95.6401	279.827	1780.51	101.934	908.105	2044.5	100.975	1073.62	1723.48	337.521	373.741	189.954	112.855	163.991	90.4176	688.199	401.353	3374.77	143.899	2358.66	159.163
ENSSSCG00000032538	GCM1	glial cells missing transcription factor 1	4.59585	-2.44882	0.573774	-4.26791	1.97311e-05	0.000201645	2.76458	4.27545	3.0118	1.00287	2.10371	11.7559	17.4646	6.3457	2.36137	2.31741	1.63158	0	0	3.45376	6.96394	0	2.77218	11.2574	10.9976	0.970796	11.7427	13.7346	1.181	12.228	15.0898	6.28364	4.79156	0	0	0	0	0.769797	0	3.85467	0.695165	5.164	3.06083
ENSSSCG00000008284		retinol dehydrogenase 12-like	33.71	-2.44723	0.406944	-6.01368	1.81357e-09	7.5289e-08	8.29375	23.515	14.0551	65.1862	23.1408	76.8051	99.2726	9.51855	12.594	8.11095	12.2369	13.654	1.24441	6.90751	19.1508	13.4748	5.54436	70.7609	58.2873	0.970796	202.562	53.9574	15.9434	128.394	31.2575	56.5528	55.9015	5.61994	6.71757	21.1601	17.106	38.4899	38.3255	19.2734	4.86615	0	8.41729
ENSSSCG00000026149	PKLR	pyruvate kinase L/R	148.71	-2.44017	0.377174	-6.46961	9.82556e-11	5.70244e-09	48.841	39.5479	19.0747	194.556	32.9581	187.31	186.596	192.486	144.831	176.124	106.869	51.2027	24.8882	40.2938	52.2296	18.8647	5.54436	266.157	40.6912	15.5327	337.604	618.058	44.8778	321.597	667.187	484.738	269.924	52.8274	30.9008	52.0186	39.9141	194.759	58.5529	152.26	72.9923	172.994	86.4685
ENSSSCG00000016628	WNT2	Wnt family member 2	10.0416	-2.43268	0.5166	-4.70903	2.48904e-06	3.5668e-05	9.21528	11.7575	0	17.0487	4.20742	24.2955	9.1919	19.0371	24.4008	23.1741	11.4211	0	0	8.05877	0	1.79664	0	11.2574	2.19952	8.73717	20.5498	11.7725	36.6109	6.11401	8.62277	9.87429	10.3817	0	0	0.88167	0	10.0074	9.58138	28.91	13.2081	7.74601	11.4781
ENSSSCG00000000111	BAIAP2L2	BAR/IMD domain containing adaptor protein 2 like 2	95.5898	-2.43142	0.312687	-7.77589	7.49214e-15	1.34032e-12	23.0382	76.958	45.177	124.355	30.1532	144.989	328.151	59.2265	60.6085	263.027	39.1579	17.0676	36.0879	24.1763	66.1574	14.3731	19.4052	25.7312	349.724	30.0947	203.541	243.299	20.0769	177.306	186.467	122.98	39.9296	40.4636	21.4962	29.9768	21.9935	130.866	116.041	238.99	19.4646	114.899	31.3735
ENSSSCG00000035429	HJV	hemojuvelin BMP co-receptor	757.229	-2.42947	0.36504	-6.65536	2.82609e-11	1.96164e-09	57.1347	612.458	258.011	659.885	771.361	793.13	829.11	1766.22	1406.59	1047.47	653.448	291.286	95.8195	124.335	264.63	36.8311	56.8296	593.427	1692.53	189.305	1358.24	2063.14	111.604	1809.75	1712.7	993.713	813.766	137.127	83.2979	297.123	138.477	1205.5	669.632	1989.01	432.392	1611.17	391.021
ENSSSCG00000000260	SOAT2	sterol O-acyltransferase 2	516.138	-2.42229	0.290223	-8.3463	7.04358e-17	2.26347e-14	19.3521	168.88	121.476	570.63	212.475	483.558	786.827	1021.66	343.973	1435.64	145.211	94.4405	29.8658	97.8564	191.508	147.324	108.115	306.363	984.286	393.172	711.414	1368.56	162.387	964.791	1330.06	505.384	428.844	56.1994	100.764	91.6937	166.987	682.04	378.997	2372.55	263.467	1563.4	286.953
ENSSSCG00000034360	CELSR2	cadherin EGF LAG seven-pass G-type receptor 2	183.548	-2.41589	0.542778	-4.45098	8.54801e-06	9.95527e-05	22.1167	86.5778	51.2006	99.2837	109.393	218.659	139.717	231.618	184.974	507.514	180.29	19.3432	6.22205	43.7476	0	21.5597	5.54436	321.64	38.4916	5.82478	573.437	843.698	31.2964	467.111	940.96	151.705	188.468	35.9676	17.4657	92.5754	42.3578	147.801	167.142	104.076	52.8325	584.823	55.8602
ENSSSCG00000030309	NDRG2	NDRG family member 2	2840.35	-2.41253	0.266219	-9.06222	1.27823e-19	7.39373e-17	485.645	3500.52	1525.98	4083.67	1299.39	4673.35	3641.83	3661.47	1754.5	5995.15	745.632	453.997	653.315	740.255	1667.86	599.179	246.724	1486.78	7533.36	463.07	5447.65	9395.46	402.129	4168.53	8191.63	2789.94	2342.27	703.617	681.162	1126.77	803.169	4745.8	5567.84	7017.43	361.486	5808.21	328.274
ENSSSCG00000037433	C3orf18	chromosome 13 C3orf18 homolog	18.9029	-2.40045	0.341898	-7.02098	2.20323e-12	2.12403e-10	1.84306	19.2395	11.0433	48.1375	9.11608	29.7816	38.606	11.6338	18.1038	46.3483	8.97369	0	3.73323	8.05877	5.22296	8.98319	1.38609	20.1025	68.1852	11.6496	39.1424	30.4124	6.49547	36.6841	26.9462	26.9299	23.9578	6.74393	5.37406	7.05336	4.88744	26.9429	20.2274	9.63668	5.56132	40.021	12.2433
ENSSSCG00000011217	NEK10	NIMA related kinase 10	2.18806	-2.38425	0.848296	-2.81064	0.00494438	0.0193854	0	2.13772	0	3.0086	0.701237	1.56745	4.59595	1.05762	2.36137	2.31741	5.71053	3.41351	1.24441	1.15125	0	0	0	0.804101	8.79809	0.970796	0.978561	0	0	1.2228	4.31139	9.87429	10.3817	0	1.34351	0	0	1.53959	1.0646	9.63668	0	0	0.765208
ENSSSCG00000007286	ACSS2	acyl-CoA synthetase short chain family member 2	66.3221	-2.38338	0.357265	-6.67117	2.53771e-11	1.79742e-09	18.4306	44.8922	26.1023	93.2665	27.3483	105.803	93.7574	70.8603	40.1433	82.2682	31	29.5838	4.97764	8.05877	5.22296	13.4748	6.93044	65.9363	21.9952	13.5911	176.141	224.659	27.7534	243.338	282.396	103.231	72.6719	23.6038	14.7787	14.1067	25.2518	107.002	87.297	59.7474	25.7211	134.264	28.3127
ENSSSCG00000007667	LRCH4	leucine rich repeats and calponin homology domain containing 4	1.7219	-2.38291	0.830739	-2.86842	0.00412532	0.0167611	0.921528	0	0	5.01433	0.701237	1.56745	9.1919	0	2.36137	1.15871	1.63158	0	0	0	0	0	0	8.04101	0	0	0	3.92418	0.590498	3.66841	1.07785	1.79533	3.19437	1.12399	2.68703	1.76334	0.814573	0.769797	0	1.92734	2.08549	3.873	3.82604
ENSSSCG00000027230	SLC35G1	solute carrier family 35 member G1	192.637	-2.38229	0.325793	-7.31229	2.62626e-13	3.26765e-11	36.8611	71.6137	82.3225	394.126	150.766	261.764	195.788	248.54	136.172	253.757	89.7369	7.96486	29.8658	51.8064	769.515	97.0185	24.9496	134.285	221.052	99.992	166.355	321.783	96.2511	222.55	382.635	373.428	136.559	77.5552	40.3054	70.5336	83.901	534.239	649.404	273.682	56.3083	213.015	71.1643
ENSSSCG00000011837	MELTF	melanotransferrin	5.70453	-2.37841	0.612259	-3.88465	0.000102477	0.000805381	0	2.13772	3.0118	23.0659	3.50619	17.242	22.9798	9.51855	0.787123	1.15871	0	0	0	5.75626	1.74099	1.79664	1.38609	8.84511	5.4988	0	15.657	10.7915	2.95249	23.2333	0	8.97663	12.7775	0	2.68703	4.40835	1.62915	13.0866	0	3.85467	0	2.582	0
ENSSSCG00000011259	SCN5A	sodium voltage-gated channel alpha subunit 5	6.27692	-2.37062	0.682105	-3.47545	0.000509997	0.00306546	0	2.13772	2.00787	44.1261	0	8.62098	12.8687	3.17285	0	3.47612	0.81579	3.41351	2.48882	11.5125	0	1.79664	0	8.04101	0	0	15.657	0.981044	0	15.8964	6.46708	16.1579	14.3747	0	9.4046	3.52668	0	10.7772	18.0982	0	0.695165	14.201	1.53042
ENSSSCG00000006551	AQP10	aquaporin 10	1.47156	-2.36387	0.847981	-2.78764	0.00530931	0.0205378	0	0	3.0118	7.02006	0.701237	0	6.43433	2.11523	0	0	1.63158	1.13784	0	0	6.96394	0	0	1.6082	1.09976	0	0	0.981044	0	7.33682	1.07785	1.79533	2.39578	1.12399	0	0.88167	0	2.30939	2.1292	1.92734	0	0	0.765208
ENSSSCG00000047297		-	1.42229	-2.36274	0.927772	-2.54669	0.0108752	0.0365942	0	1.06886	0	0	2.10371	3.1349	4.59595	2.11523	0.787123	3.47612	0	0	0	0	0	0	0	1.6082	5.4988	0.970796	2.93568	3.92418	0	3.66841	5.38923	0	0.798593	0	0	0	0	0	0	3.85467	0	5.164	1.53042
ENSSSCG00000038660	HAAO	3-hydroxyanthranilate 3,4-dioxygenase	1134.91	-2.36065	0.298415	-7.91063	2.56094e-15	5.16744e-13	102.29	487.401	403.581	1135.24	634.62	1088.59	1431.18	1921.69	930.38	3159.8	403	131.989	120.708	227.948	283.781	224.58	202.369	814.555	1809.11	367.932	2242.86	3119.72	136.995	2296.42	3366.11	818.669	893.625	143.87	128.977	356.195	283.471	1264.78	1063.53	4974.45	356.619	4238.36	426.221
ENSSSCG00000016652	LRRN3	leucine rich repeat neuronal 3	339.922	-2.35992	0.357584	-6.59961	4.12239e-11	2.65933e-09	20.2736	24.5838	31.1219	565.616	25.9458	228.064	201.303	1534.6	431.344	1150.6	90.5527	59.1675	89.5975	74.8314	351.679	26.9496	31.88	150.367	267.242	45.6274	74.3707	820.153	38.9728	188.312	1872.22	194.793	194.857	34.8436	107.481	31.7401	25.2518	396.446	286.377	1266.26	110.531	1425.27	107.894
ENSSSCG00000011432	GLYCTK	glycerate kinase	1200.88	-2.35624	0.269033	-8.75821	1.98376e-18	9.05899e-16	235.911	510.916	334.31	1305.73	832.369	1605.07	1947.76	2289.74	927.231	2236.31	611.027	81.9243	220.26	389.123	604.122	199.427	393.649	793.648	1989.47	882.454	2711.59	2711.61	330.088	3113.26	2605.15	1716.33	1712.98	273.129	224.367	387.053	268.809	2093.85	1135.93	3467.28	514.422	2260.54	515.75
ENSSSCG00000024752	ALDH4A1	aldehyde dehydrogenase 4 family member A1	1542.9	-2.35032	0.296993	-7.91374	2.49761e-15	5.09894e-13	258.949	1318.98	331.298	1909.46	1053.26	2261.83	3102.27	2203.02	651.738	2360.29	271.658	334.524	189.15	714.928	499.663	397.955	163.559	1565.59	1581.46	218.429	4312.52	5481.09	187.778	5321.64	4673.54	1921	2024.43	681.137	300.947	486.682	298.134	1996.08	1428.69	3525.1	345.497	2384.48	330.57
ENSSSCG00000049370		uncharacterized LOC102160793	4.87688	-2.34948	0.561184	-4.18664	2.83111e-05	0.000272158	0.921528	0	4.01573	6.01719	3.50619	10.1884	8.27271	4.23047	0.787123	3.47612	0.81579	0	0	1.15125	3.48197	0.898319	0	6.43281	3.29928	0.970796	10.7642	8.8294	1.181	2.44561	24.7905	12.5673	7.98593	1.12399	0	1.76334	4.88744	9.23757	21.292	5.78201	1.39033	2.582	5.35645
ENSSSCG00000010394	OGDHL	oxoglutarate dehydrogenase like	3.93513	-2.34911	0.721283	-3.25685	0.00112658	0.00591691	1.84306	0	1.00393	6.01719	0	3.1349	7.35352	7.40332	5.50986	17.3806	0	0	0	3.45376	0	0	0	2.4123	12.0974	0.970796	2.93568	8.8294	1.181	2.44561	7.54492	3.59065	1.59719	2.24798	0	0	0	3.07919	0	25.0554	2.78066	14.201	1.53042
ENSSSCG00000004643	SLC27A2	solute carrier family 27 member 2	48.7072	-2.32928	0.494435	-4.71099	2.46521e-06	3.53837e-05	4.60764	7.48203	6.0236	21.0602	37.1656	39.97	14.707	67.6875	4.72274	81.1095	9.78948	1.13784	1.24441	3.45376	17.4099	16.1697	6.93044	35.3805	162.765	4.85398	60.6708	383.588	10.629	63.5857	320.12	31.4182	35.9367	0	0	0	8.14573	25.4033	22.3565	146.478	0.695165	147.174	2.29562
ENSSSCG00000035409		alcohol dehydrogenase 1-like	6.51728	-2.32604	0.487746	-4.76896	1.8518e-06	2.80894e-05	0.921528	2.13772	3.0118	6.01719	2.10371	10.9722	6.43433	3.17285	3.14849	25.4916	3.26316	5.68918	1.24441	2.3025	17.4099	0	0	8.84511	14.2969	0	6.84993	18.6398	0.590498	12.228	12.9342	2.69299	3.99296	1.12399	0	2.64501	1.62915	12.3168	9.58138	9.63668	0.695165	24.529	4.59125
ENSSSCG00000049918		-	2.38996	-2.32161	0.778986	-2.9803	0.00287966	0.012502	1.84306	9.61975	0	0	0.701237	4.70235	1.83838	0	0	4.63483	0	2.27567	0	0	0	0.898319	0	1.6082	4.39904	0	4.89281	1.96209	0	11.0052	2.15569	2.69299	0	4.49595	0	0.88167	2.44372	10.0074	13.8398	0	0	0	1.53042
ENSSSCG00000001989	CIDEB	cell death inducing DFFA like effector b	634.331	-2.32155	0.265286	-8.75115	2.11189e-18	9.39682e-16	67.2716	123.988	170.669	837.392	110.795	353.46	698.585	1746.12	330.592	1473.88	224.342	187.743	153.062	110.52	452.656	72.7639	45.7409	433.411	707.146	87.3717	843.52	1951.3	73.2217	1162.89	2296.89	788.148	528.668	134.879	182.718	241.578	122.186	778.265	417.322	3091.45	250.259	2028.16	191.302
ENSSSCG00000033276	RIPPLY1	ripply transcriptional repressor 1	35.9497	-2.32139	0.363814	-6.3807	1.76277e-10	9.71093e-09	12.9014	43.8233	17.0669	90.2579	13.3235	83.0749	131.444	22.2099	23.6137	28.9677	4.89474	4.55135	23.6438	17.2688	20.8918	7.18655	4.15827	35.3805	41.7909	0.970796	91.9848	63.7679	2.95249	100.27	34.4911	50.2691	66.2832	39.3396	4.03054	9.69838	13.0332	89.2965	71.328	32.7647	0.695165	30.984	1.53042
ENSSSCG00000028530	TMEM52	transmembrane protein 52	58.8296	-2.32125	0.377503	-6.14895	7.79971e-10	3.59969e-08	9.21528	97.2664	29.1141	178.51	8.41485	115.208	137.879	21.1523	9.44548	11.5871	8.1579	14.7919	54.754	20.7225	188.026	6.28823	5.54436	20.9066	13.1971	16.5035	49.9066	5.88627	2.95249	70.9226	1.07785	105.924	99.8241	86.5471	61.8016	54.6636	16.2915	354.877	212.92	40.4741	13.9033	12.91	19.1302
ENSSSCG00000013302	CAT	catalase	4837.68	-2.31762	0.27255	-8.50347	1.84008e-17	6.79381e-15	1021.97	3732.46	576.258	3968.34	2135.97	5432.78	5155.74	10121.4	3520.8	13916.1	1455.37	1200.42	583.628	885.313	2233.68	1938.57	583.543	3537.24	13053.1	1034.87	10208.4	16987.8	1126.08	8878.77	17830.8	3949.72	3441.93	1243.13	506.505	1194.66	1010.88	5550.24	3992.24	13477.9	677.09	12104.4	726.182
ENSSSCG00000006455		CD5 molecule like	1706.5	-2.31669	0.37578	-6.16501	7.04768e-10	3.27001e-08	182.463	1083.83	145.57	1088.11	145.857	1263.36	835.544	5460.47	406.156	7247.71	164.79	562.091	394.478	285.511	583.23	70.0689	67.9184	692.331	3279.49	57.277	2090.21	7579.55	70.2692	3565.69	5783.72	1283.66	1165.15	1372.39	411.115	648.909	109.967	2294.77	1522.37	5039.98	92.4569	5978.63	115.546
ENSSSCG00000040329	ALX4	ALX homeobox 4	7.71292	-2.31134	0.626701	-3.6881	0.000225932	0.00157075	0.921528	0	0	10.0287	0.701237	0	2.75757	3.17285	5.50986	9.26966	4.07895	2.27567	1.24441	4.60501	3.48197	0.898319	0	1.6082	4.39904	0	6.84993	9.81044	13.5814	12.228	21.5569	3.59065	1.59719	1.12399	0	5.29002	7.33115	53.116	37.2609	7.70935	12.513	32.275	4.59125
ENSSSCG00000000259	CSAD	cysteine sulfinic acid decarboxylase	506.814	-2.30979	0.325879	-7.08788	1.36182e-12	1.44096e-10	77.4084	218.048	128.503	634.814	309.246	526.663	683.878	764.657	387.265	786.762	190.895	81.9243	46.0432	75.9827	111.423	325.192	65.1462	759.876	1165.75	151.444	644.872	1784.52	170.654	2048.19	1474.49	514.361	651.652	127.011	71.2062	77.587	130.332	460.339	308.733	1221.93	253.735	1035.38	286.188
ENSSSCG00000000453	ATP23	ATP23 metallopeptidase and ATP synthase assembly factor homolog	298.828	-2.30665	0.201395	-11.4533	2.26258e-30	4.36251e-27	81.0945	360.206	131.515	666.905	138.845	462.398	672.847	190.371	181.825	127.458	110.132	60.3054	108.264	118.579	614.568	88.0353	123.362	299.93	865.512	279.589	842.541	434.603	173.016	569.826	128.264	470.375	451.205	94.415	166.596	112.854	109.967	474.965	375.803	371.976	184.219	213.015	201.25
ENSSSCG00000031957	RIMS2	regulating synaptic membrane exocytosis 2	66.6766	-2.30296	0.346166	-6.65277	2.87636e-11	1.98069e-09	7.37223	7.48203	12.0472	36.1031	11.921	60.3468	38.606	185.083	343.973	119.347	175.395	13.654	1.24441	1.15125	3.48197	4.4916	11.0887	19.2984	28.5938	136.882	49.9066	98.1044	96.8416	69.6998	144.431	30.5205	35.1381	3.37196	1.34351	12.3434	10.5894	71.5911	22.3565	86.7301	201.598	117.481	197.424
ENSSSCG00000028115	ALDH8A1	aldehyde dehydrogenase 8 family member A1	1162.66	-2.30193	0.296512	-7.76335	8.27161e-15	1.43537e-12	141.915	1067.79	243.956	1604.58	401.809	829.965	1933.98	2330.99	1497.11	2707.9	1022.19	625.81	51.0208	315.443	525.778	158.104	446.321	1168.36	2657.02	377.64	1679.21	2922.53	200.179	1971.16	2937.13	812.385	884.042	225.922	189.435	381.763	136.848	1350.99	1421.24	2426.52	748.692	3964.66	658.079
ENSSSCG00000013106	PTGDR2	prostaglandin D2 receptor 2	13.7007	-2.29916	0.581152	-3.95621	7.61476e-05	0.000626251	9.21528	11.7575	1.00393	5.01433	6.31114	9.4047	8.27271	7.40332	2.36137	3.47612	9.78948	0	4.97764	2.3025	3.48197	2.69496	0	32.9681	0	1.94159	50.8852	58.8627	8.85746	52.5805	44.1917	64.6317	25.555	3.37196	1.34351	3.52668	3.25829	10.0074	9.58138	0	9.7323	12.91	25.2519
ENSSSCG00000005309	FAM166B	family with sequence similarity 166 member B	9.19959	-2.29577	0.457239	-5.02095	5.14174e-07	9.41411e-06	6.4507	9.61975	2.00787	12.0344	1.40247	10.9722	25.7373	12.6914	6.29699	6.95224	2.44737	0	6.22205	0	3.48197	1.79664	1.38609	8.04101	34.0926	6.79557	18.5927	17.6588	4.72398	14.6736	37.7246	8.97663	5.59015	2.24798	0	7.93503	2.44372	17.7053	8.51678	26.9827	2.78066	3.873	1.53042
ENSSSCG00000004923	SLC51B	solute carrier family 51 beta subunit	129.535	-2.28891	0.441725	-5.18176	2.19803e-07	4.58994e-06	26.7243	41.6856	61.2399	214.613	146.559	293.897	405.363	216.811	295.958	105.442	93.8159	34.1351	33.5991	8.05877	22.6328	9.88151	1.38609	37.7928	149.567	42.715	150.698	607.266	99.7941	86.819	605.75	79.892	67.0818	12.3639	4.03054	20.2784	6.51658	106.232	120.3	474.125	34.0631	58.095	17.5998
ENSSSCG00000015268	FMO1	flavin containing dimethylaniline monoxygenase 1	1444.98	-2.28652	0.393226	-5.81476	6.07195e-09	2.12432e-07	258.949	1882.27	227.893	1599.57	375.162	1993.01	2027.73	1469.03	204.652	5573.38	659.158	466.513	158.04	139.302	541.446	178.766	293.851	2366.47	1312.01	37.8611	3799.75	1308.71	37.2014	2236.51	3509.47	1034.11	648.457	1342.04	443.36	1792.44	641.069	2703.53	2904.22	4303.74	44.4905	4914.84	35.1996
ENSSSCG00000000231		ankyrin repeat domain 33	129.826	-2.28646	0.416489	-5.48985	4.02286e-08	1.08438e-06	19.3521	166.742	116.456	335.96	41.373	339.353	331.828	27.498	45.6532	19.698	17.1316	25.0324	70.9313	81.7389	400.427	22.458	70.6905	62.7199	309.033	0.970796	137.977	157.948	5.31448	162.633	21.5569	425.492	143.747	78.6792	56.4276	79.3503	36.6558	612.759	300.216	63.6021	2.78066	10.328	3.06083
ENSSSCG00000003551	PAQR7	progestin and adipoQ receptor family member 7	1507.3	-2.28553	0.291029	-7.85326	4.05347e-15	7.72965e-13	322.535	964.113	416.632	1776.07	315.557	2853.54	1814.48	1609.69	1209.02	2931.53	509.869	103.543	500.253	452.442	3605.58	437.481	302.167	514.625	3725.99	1178.55	1581.35	2080.8	763.513	1113.97	3708.87	2705.56	1014.21	421.496	994.2	786.45	268.809	2860.57	1726.78	5614.33	411.537	3764.56	409.386
ENSSSCG00000039673	ASB16	ankyrin repeat and SOCS box containing 16	2.13271	-2.28108	0.839671	-2.71663	0.00659498	0.0244954	0	1.06886	0	0	0.701237	0.783725	1.83838	5.28808	10.2326	3.47612	8.1579	0	0	0	0	0.898319	1.38609	0	5.4988	1.94159	0	2.94313	4.72398	3.66841	6.46708	1.79533	0.798593	0	0	0	0	4.61878	0	1.92734	3.47582	6.45501	0.765208
ENSSSCG00000033207	SULT2A1	sulfotransferase family 2A member 1	6608.23	-2.2762	0.369728	-6.15642	7.44085e-10	3.44323e-08	1021.97	7178.47	4450.44	26169.8	2533.57	13835.9	22334.5	3174.96	31.4849	6148.1	35.079	656.532	6509.51	5005.65	16548.1	1551.4	2682.08	2722.69	9554.72	250.465	9164.23	6292.42	74.9932	23847.1	4345.88	12805.2	9638.21	3305.65	3526.72	623.341	710.307	12128.2	9292.87	8565.08	25.0259	7731.81	32.1387
ENSSSCG00000010546		cytochrome P450 2C33	4065.71	-2.27434	0.357774	-6.35691	2.0585e-10	1.10935e-08	1296.59	3069.77	1128.42	5649.14	3112.09	6609.15	5357.04	3442.54	788.698	3418.19	589.001	428.965	1151.08	670.029	2381.67	803.097	475.429	10209.7	1608.95	150.473	15716.7	14557.7	505.466	11249.8	19253.6	4906.63	6268.95	2514.36	948.521	1232.58	1631.59	5852	6275.8	3748.67	248.174	2979.63	201.25
ENSSSCG00000005272	NMRK1	nicotinamide riboside kinase 1	118.608	-2.26794	0.346311	-6.54885	5.79835e-11	3.54625e-09	15.666	21.3772	34.1337	122.35	48.3854	99.5331	137.879	227.388	173.167	368.469	31	10.2405	14.9329	16.1175	53.9705	25.1529	11.0887	62.7199	384.916	36.8903	132.106	338.46	38.9728	195.648	384.791	68.2224	59.0959	19.1078	18.8092	29.9768	34.2121	62.3536	46.8423	506.889	40.3195	466.051	51.2689
ENSSSCG00000008935		UDP-glucuronosyltransferase 2B31	98.988	-2.26065	0.455243	-4.96581	6.84136e-07	1.19675e-05	4.60764	6.41317	7.02753	37.106	25.2445	50.1584	20.2222	720.237	162.147	583.989	160.711	6.82702	8.71087	2.3025	20.8918	2.69496	5.54436	6.43281	135.271	35.9195	105.685	169.721	98.6131	55.0261	217.725	20.6462	9.58311	4.49595	9.4046	1.76334	10.5894	21.5543	4.25839	443.287	27.8066	424.739	35.1996
ENSSSCG00000022948	SLC7A9	solute carrier family 7 member 9	73.9986	-2.25853	0.381778	-5.91582	3.30223e-09	1.25117e-07	4.60764	18.1706	18.0708	67.192	32.2569	170.852	143.394	118.453	64.5441	90.3792	10.6053	38.6865	44.7987	11.5125	13.9279	4.4916	18.0192	71.565	117.674	26.2115	157.548	186.398	8.85746	226.219	244.671	179.533	90.241	41.5876	20.1527	17.6334	9.77487	73.9005	63.8759	198.516	36.8437	72.2961	24.4866
ENSSSCG00000051218		-	2.65515	-2.25435	0.711328	-3.16921	0.00152853	0.00757542	0	2.13772	1.00393	3.0086	2.10371	3.1349	7.35352	7.40332	0	0	0.81579	0	0	0	1.74099	1.79664	0	2.4123	10.9976	2.91239	2.93568	4.90522	0.590498	3.66841	7.54492	0	0	0	1.34351	0.88167	0.814573	3.84899	2.1292	11.564	1.39033	9.03701	0.765208
ENSSSCG00000012600	AGTR2	angiotensin II receptor type 2	7.20364	-2.24194	0.731581	-3.06452	0.00218022	0.0100674	0.921528	10.6886	0	33.0946	1.40247	3.1349	7.35352	0	0.787123	2.31741	0.81579	13.654	0	2.3025	5.22296	0	0	41.0092	5.4988	0	19.5712	10.7915	0	19.5648	5.38923	6.28364	19.9648	15.7358	1.34351	21.1601	0	6.15838	1.0646	0	6.95165	1.291	3.06083
ENSSSCG00000007857	ACSM3	acyl-CoA synthetase medium chain family member 3	81.2836	-2.23915	0.355632	-6.29625	3.04937e-10	1.56555e-08	35.0181	154.985	11.0433	175.501	22.4396	112.856	83.6463	116.338	100.752	108.918	72.6053	36.4108	14.9329	19.5713	33.0787	9.88151	2.77218	202.634	30.7933	23.2991	118.406	153.043	34.2489	155.296	427.905	121.184	74.2691	47.2075	21.4962	42.3202	27.6955	146.261	84.1032	26.9827	38.2341	80.0421	41.3212
ENSSSCG00000044303		-	3.23696	-2.23726	0.5574	-4.01374	5.97639e-05	0.000509123	1.84306	1.06886	1.00393	7.02006	1.40247	7.83725	4.59595	7.40332	3.14849	5.79354	6.52632	0	0	1.15125	5.22296	0	0	3.2164	1.09976	3.88319	1.95712	0.981044	3.54299	3.66841	3.23354	3.59065	5.59015	1.12399	0	2.64501	1.62915	5.38858	3.19379	0	5.56132	11.619	3.82604
ENSSSCG00000017926	SLC16A13	solute carrier family 16 member 13	878.958	-2.23465	0.248297	-8.99989	2.2595e-19	1.26481e-16	102.29	499.158	414.625	1905.44	224.396	1155.99	1204.14	1224.72	486.442	1188.83	277.369	135.403	247.637	504.249	1018.48	221.885	411.668	470.399	1467.08	372.786	1036.3	1434.29	151.167	1033.27	1805.39	1810.59	1299.31	186.582	349.314	228.353	211.789	2213.94	1122.09	3482.7	273.2	2037.2	312.97
ENSSSCG00000050333		-	4.25229	-2.23018	0.766509	-2.90953	0.00361978	0.0150381	0	0	2.00787	6.01719	0	3.1349	4.59595	8.46093	0	12.7458	1.63158	0	0	1.15125	0	2.69496	0	1.6082	8.79809	0	1.95712	36.2986	0.590498	1.2228	22.6348	2.69299	0	1.12399	0	0.88167	0	10.0074	0	17.346	0.695165	9.03701	0
ENSSSCG00000010543	ABCC2	ATP binding cassette subfamily C member 2	578.522	-2.22582	0.356964	-6.23542	4.5058e-10	2.21499e-08	97.682	116.506	93.3658	333.954	429.157	507.854	574.494	830.229	381.755	796.032	473.974	65.9945	77.1534	103.613	188.026	137.443	20.7913	768.721	994.184	588.303	1424.79	1202.76	465.312	988.025	2583.6	823.157	447.212	70.8113	37.6184	287.425	236.226	988.42	490.779	2029.49	373.999	1040.55	335.926
ENSSSCG00000003374	ESPN	espin	214.932	-2.21941	0.335001	-6.6251	3.47022e-11	2.29842e-09	13.8229	78.0269	120.472	321.92	92.5633	184.175	345.616	494.965	128.301	509.831	69.3422	12.5162	14.9329	93.2514	90.5312	53.0008	48.5131	108.554	203.456	94.1672	342.496	660.243	48.4208	539.256	585.271	231.597	240.376	13.4879	20.1527	43.2019	92.0467	285.595	146.914	996.433	81.3343	487.998	59.6862
ENSSSCG00000021227	HGD	homogentisate 1,2-dioxygenase	3731.92	-2.21369	0.324219	-6.82776	8.62534e-12	6.89749e-10	179.698	1621.46	1733.79	6254.87	1226.46	3936.65	6760.65	6115.14	794.995	8508.39	896.553	485.856	176.706	1306.67	2487.87	2257.48	1198.97	2943.81	8870.67	752.367	6241.26	10011.6	385.595	6263.2	10449.7	3795.32	4674.16	296.733	419.176	567.796	1568.87	3532.6	2662.56	14977.3	387.902	12986.2	351.996
ENSSSCG00000027875	CA14	carbonic anhydrase 14	208.614	-2.21244	0.408195	-5.42006	5.95787e-08	1.5204e-06	18.4306	117.575	86.3383	113.324	211.072	225.713	516.585	150.182	257.389	256.074	159.895	26.1703	34.8435	29.9326	52.2296	14.3731	77.621	87.647	247.446	463.07	209.412	185.417	44.8778	423.09	173.533	109.515	194.058	22.4798	53.7406	24.6868	21.1789	296.372	305.539	1227.71	202.988	886.918	191.302
ENSSSCG00000008948	ALB	albumin	111096	-2.21192	0.372863	-5.93227	2.98779e-09	1.1481e-07	6711.49	17128.5	9141.82	22391	1949.44	45858.9	29937.1	326631	24688.1	247229	16712.3	22284.5	23608.9	14980.1	58563.3	1520.85	3438.89	31600.4	155056	6428.61	69130.5	497337	7132.62	70635.2	782144	47427.1	28239.8	25952.9	18001.7	11504	1960.68	70619.7	46734.8	825434	9190.77	523633	9604.89
ENSSSCG00000031174	FBP1	fructose-bisphosphatase 1	4712.85	-2.20688	0.329776	-6.69206	2.20046e-11	1.56494e-09	295.811	1576.57	1428.6	1069.05	1063.78	1145.81	3304.49	17652.7	467.551	17641.3	323.869	1045.67	573.673	468.56	2957.93	731.232	224.546	771.133	10211.3	243.67	5556.27	18837	242.104	3388.39	22462.3	1436.26	1042.96	451.843	642.2	314.756	291.617	3592.64	2557.16	29282	216.891	20670.2	193.598
ENSSSCG00000040088		glycine N-acyltransferase-like	415.3	-2.20338	0.360765	-6.10753	1.01186e-09	4.49073e-08	27.6458	442.509	38.1495	302.865	40.6718	149.692	195.788	179.795	262.899	1315.13	126.447	292.424	238.927	107.066	974.952	158.104	198.211	496.935	1319.71	87.3717	1205.59	1278.3	90.3461	799.713	1006.71	698.382	453.601	40.4636	33.5878	280.371	39.9141	578.888	287.441	452.924	43.1002	1066.37	55.095
ENSSSCG00000047342		-	1.12569	-2.19585	0.891784	-2.46231	0.0138045	0.0443362	0	3.20658	0	1.00287	0.701237	2.35118	0.91919	0	3.14849	2.31741	2.44737	0	0	0	0	0	0	1.6082	1.09976	0	0	2.94313	3.54299	0	1.07785	3.59065	3.19437	0	0	0.88167	0.814573	1.53959	0	0	1.39033	3.873	0
ENSSSCG00000041230		-	50.264	-2.19353	0.386589	-5.67406	1.39454e-08	4.37603e-07	22.1167	17.1018	14.0551	57.1633	18.9334	29.7816	67.1009	174.507	62.1827	85.7443	31	6.82702	3.73323	11.5125	12.1869	9.88151	0	14.4738	166.064	25.2407	34.2496	129.498	18.8959	94.1558	76.5271	25.1346	14.3747	12.3639	8.06108	19.3968	11.404	65.4328	33.0025	281.391	16.684	174.285	15.3042
ENSSSCG00000031184		kinesin family member 6	4.66697	-2.19047	0.6806	-3.21844	0.00128889	0.00661526	0	0	4.01573	4.01146	1.40247	9.4047	7.35352	3.17285	6.29699	13.9045	2.44737	0	0	1.15125	3.48197	2.69496	1.38609	2.4123	8.79809	18.4451	2.93568	7.84835	2.36199	7.33682	6.46708	0.897663	0.798593	0	0	0	0	6.15838	1.0646	26.9827	3.47582	12.91	3.06083
ENSSSCG00000002623	GSTA1	glutathione S-transferase alpha 1	1156.55	-2.18687	0.411266	-5.31741	1.05255e-07	2.44837e-06	11.0583	5.34431	16.0629	60.1719	53.294	41.5374	216.929	4417.66	80.2866	4558.35	34.2632	53.4783	54.754	10.3613	241.997	7.18655	5.54436	24.123	2908.87	65.0434	332.711	4965.07	71.4502	146.736	7745.4	66.4271	35.9367	29.2237	36.2749	14.9884	17.9206	173.204	128.816	11984.2	31.9776	6935.26	31.3735
ENSSSCG00000002357	ALDH6A1	aldehyde dehydrogenase 6 family member A1	743.634	-2.18567	0.297999	-7.33449	2.22564e-13	2.86085e-11	82.9375	530.155	236.928	842.407	586.234	1197.53	850.251	992.044	432.131	1229.39	177.842	175.227	77.1534	148.512	289.004	389.871	181.578	1051.76	1898.19	140.765	2347.57	2133.77	125.185	1752.28	1748.27	684.019	812.967	239.41	122.26	313.875	316.869	911.44	1125.28	1669.07	118.178	1418.81	165.285
ENSSSCG00000015379	DNAH11	dynein axonemal heavy chain 11	6.38414	-2.18565	0.528392	-4.13643	3.52752e-05	0.000327693	0	1.06886	0	9.02579	1.40247	6.2698	6.43433	11.6338	9.44548	15.0632	4.07895	2.27567	1.24441	0	1.74099	0.898319	1.38609	8.84511	5.4988	1.94159	13.6999	25.5072	1.181	1.2228	20.4791	8.07897	2.39578	3.37196	1.34351	2.64501	1.62915	5.38858	2.1292	7.70935	5.56132	38.73	6.88687
ENSSSCG00000016856	C9	complement C9	6.75881	-2.17055	0.449714	-4.82651	1.38948e-06	2.19596e-05	0.921528	3.20658	4.01573	20.0573	1.40247	10.1884	16.5454	26.4404	1.57425	4.63483	0.81579	0	1.24441	4.60501	13.9279	1.79664	2.77218	6.43281	8.79809	0.970796	8.80705	24.5261	0	15.8964	3.23354	9.87429	6.38874	3.37196	4.03054	2.64501	0	6.15838	6.38759	9.63668	0.695165	18.074	0
ENSSSCG00000031550	C1orf105	chromosome 9 C1orf105 homolog	5.7751	-2.1702	0.441421	-4.9164	8.81519e-07	1.47228e-05	0.921528	0	0	9.02579	2.10371	12.5396	6.43433	3.17285	0	6.95224	0	2.27567	2.48882	1.15125	8.70493	2.69496	0	2.4123	8.79809	0.970796	7.82849	6.86731	0	13.4508	6.46708	7.1813	5.59015	6.74393	10.7481	2.64501	0.814573	23.0939	12.7752	15.4187	0.695165	21.947	0.765208
ENSSSCG00000016215		tubulin alpha-1D chain	110.944	-2.16592	0.595543	-3.63689	0.000275949	0.00183892	4.60764	132.539	10.0393	214.613	7.01237	124.612	204.979	10.5762	99.9647	38.2373	110.132	108.095	160.529	9.21002	123.61	7.18655	13.8609	225.148	194.658	7.76637	330.754	20.6019	9.44796	534.365	220.959	433.571	452.802	8.99191	9.4046	111.972	18.7352	32.3315	27.6795	13.4914	6.95165	59.386	6.12166
ENSSSCG00000009543		myosin XVI	8.70147	-2.16393	0.479206	-4.51567	6.31181e-06	7.75151e-05	3.68611	6.41317	2.00787	37.106	0.701237	10.1884	2.75757	1.05762	0.787123	13.9045	0.81579	10.2405	7.46646	5.75626	26.1148	4.4916	1.38609	22.5148	1.09976	0	9.78561	8.8294	1.181	33.0157	16.1677	20.6462	27.1522	1.12399	4.03054	0.88167	1.62915	14.6261	2.1292	9.63668	0	10.328	2.29562
ENSSSCG00000000376	SUOX	sulfite oxidase	216.993	-2.16284	0.224112	-9.65073	4.88053e-22	4.7051e-19	65.4285	275.766	36.1416	454.298	138.845	274.304	284.03	215.754	102.326	413.659	66.079	59.1675	53.5096	81.7389	87.0493	102.408	34.6522	216.303	259.544	56.3062	481.452	519.954	73.8122	545.37	437.606	427.288	346.589	97.787	63.1452	98.7471	87.9738	357.186	409.87	385.467	62.5648	276.274	80.3468
ENSSSCG00000017172	ST6GALNAC1	ST6 N-acetylgalactosaminide alpha-2,6-sialyltransferase 1	6.189	-2.16136	0.588443	-3.67301	0.000239707	0.00165131	0	1.06886	0	9.02579	0.701237	0.783725	3.67676	5.28808	3.93562	6.95224	0.81579	3.41351	2.48882	2.3025	5.22296	1.79664	0	1.6082	4.39904	0	3.91424	14.7157	0	1.2228	14.012	8.97663	1.59719	0	5.37406	0.88167	0	14.6261	14.9044	28.91	4.17099	60.677	1.53042
ENSSSCG00000007909	ABAT	4-aminobutyrate aminotransferase	464.667	-2.15656	0.300227	-7.18308	6.81566e-13	7.78107e-11	103.211	146.434	140.551	415.186	279.794	521.177	615.858	586.977	238.498	1192.31	166.421	76.2351	78.3978	73.6801	113.164	62.8823	131.678	340.939	1077.77	86.4009	970.733	1690.34	66.7262	744.687	1712.7	315.08	223.606	80.9272	64.4887	143.712	87.1593	320.236	451.389	2116.22	148.07	1478.2	130.851
ENSSSCG00000026005	SAMD13	sterile alpha motif domain containing 13	6.89604	-2.15417	0.572891	-3.76017	0.000169796	0.00123645	0.921528	10.6886	0	12.0344	5.6099	21.9443	14.707	4.23047	30.6978	1.15871	2.44737	0	1.24441	1.15125	6.96394	4.4916	4.15827	6.43281	0	3.88319	2.93568	11.7725	2.36199	22.0105	4.31139	8.07897	13.5761	1.12399	0	0	6.51658	6.15838	4.25839	5.78201	11.1226	15.492	6.88687
ENSSSCG00000006106	CDH17	cadherin 17	143.171	-2.14848	0.284476	-7.55243	4.27215e-14	6.39092e-12	44.2334	166.742	35.1377	217.622	38.568	197.499	224.282	281.326	130.662	275.772	105.237	47.7892	75.909	26.4788	245.479	8.98319	24.9496	132.677	170.463	45.6274	292.59	271.749	12.4005	270.239	251.138	149.012	155.726	71.9352	104.794	98.7471	21.9935	264.04	159.69	439.433	43.7954	147.174	47.4429
ENSSSCG00000015767	SPATA4	spermatogenesis associated 4	111.635	-2.1473	0.388046	-5.53363	3.13676e-08	8.75115e-07	10.1368	14.9641	36.1416	50.1433	40.6718	47.0235	36.7676	288.729	144.831	400.913	98.7106	13.654	3.73323	14.9663	20.8918	12.5765	13.8609	66.7404	347.524	71.8389	110.577	259.977	72.6312	118.612	409.582	45.7808	19.1662	8.99191	5.37406	12.3434	18.7352	61.5838	27.6795	557	95.9327	469.924	101.773
ENSSSCG00000026453	ACSM5	acyl-CoA synthetase medium chain family member 5	100.44	-2.14624	0.314881	-6.81604	9.3583e-12	7.38157e-10	5.52917	71.6137	26.1023	127.364	24.5433	116.775	104.788	51.8232	25.1879	191.187	57.1053	53.4783	19.9106	27.6301	66.1574	54.7975	33.2661	50.6584	240.848	21.3575	241.705	384.569	45.4683	306.924	137.964	126.57	94.2339	34.8436	63.1452	29.9768	61.093	263.271	87.297	86.7301	107.751	161.375	113.251
ENSSSCG00000010559		PDZ domain containing 7	1.77462	-2.1418	0.794523	-2.69571	0.00702392	0.0257851	1.84306	1.06886	0	4.01146	0.701237	1.56745	5.51514	0	2.36137	1.15871	0.81579	0	1.24441	0	3.48197	0	0	0.804101	6.59857	0	1.95712	5.88627	1.77149	1.2228	0	1.79533	3.19437	1.12399	0	1.76334	0.814573	3.07919	0	7.70935	4.17099	0	0
ENSSSCG00000051018		-	4.8548	-2.14038	0.562651	-3.80409	0.000142327	0.0010632	1.84306	7.48203	3.0118	4.01146	4.20742	18.8094	5.51514	3.17285	1.57425	0	4.89474	4.55135	1.24441	0	0	0.898319	0	15.2779	4.39904	0	7.82849	9.81044	2.36199	20.7876	0	16.1579	13.5761	0	4.03054	1.76334	3.25829	10.0074	3.19379	0	2.08549	3.873	0
ENSSSCG00000009995	HORMAD2	HORMA domain containing 2	3.12887	-2.1376	0.605499	-3.53032	0.000415065	0.00258529	0.921528	1.06886	0	6.01719	1.40247	3.91863	6.43433	3.17285	3.14849	6.95224	2.44737	0	2.48882	2.3025	0	0.898319	0	3.2164	4.39904	0	1.95712	7.84835	1.181	6.11401	8.62277	3.59065	0.798593	1.12399	0	1.76334	0	6.92818	5.32299	11.564	0.695165	2.582	6.88687
ENSSSCG00000034102	DGAT2	diacylglycerol O-acyltransferase 2	707.814	-2.1332	0.377295	-5.65392	1.56826e-08	4.85099e-07	50.6841	45.9611	209.822	982.808	164.791	343.272	485.333	1418.26	1052.38	1972.12	279	70.5459	72.1758	501.946	175.84	214.698	66.5323	436.627	644.46	296.093	457.967	1354.82	140.538	1526.06	2203.12	956.011	709.15	80.9272	139.725	97.8654	104.265	1257.08	418.387	3282.25	546.399	2838.91	592.271
ENSSSCG00000004510	ACAA2	acetyl-CoA acyltransferase 2	383.935	-2.13088	0.299443	-7.11615	1.10985e-12	1.21894e-10	88.4667	312.108	93.3658	634.814	260.159	325.246	489.928	595.438	802.866	704.494	251.263	79.6486	67.1981	86.3439	193.249	127.561	72.0766	216.303	728.042	190.276	572.458	1190.99	235.609	1615.32	548.624	188.509	285.896	84.2991	114.199	81.9954	142.55	282.516	378.997	1106.29	259.296	509.945	289.249
ENSSSCG00000022258		antileukoproteinase	145.533	-2.12545	0.527282	-4.03096	5.55499e-05	0.000480537	29.4889	41.6856	69.2714	940.688	80.6423	119.126	434.777	12.6914	18.891	4.63483	3.26316	19.3432	49.7764	236.007	123.61	128.46	99.7984	138.305	112.176	13.5911	355.218	32.3745	11.81	1336.52	7.54492	57.4504	577.383	41.5876	16.1222	14.1067	84.7156	23.8637	57.4883	19.2734	18.7694	37.439	16.8346
ENSSSCG00000017781	PIPOX	peroxisomal sarcosine oxidase	21.4124	-2.12458	0.494236	-4.29872	1.71787e-05	0.00017904	2.76458	1.06886	7.02753	13.0372	0.701237	10.9722	15.6262	76.1484	10.2326	56.7767	8.97369	2.27567	2.48882	6.90751	12.1869	0	0	5.62871	42.8907	1.94159	13.6999	77.5025	3.54299	9.78242	35.5689	6.28364	3.19437	5.61994	5.37406	0.88167	0.814573	13.8564	6.38759	156.114	0.695165	172.994	2.29562
ENSSSCG00000023434	PPM1L	protein phosphatase, Mg2+/Mn2+ dependent 1L	155.082	-2.11256	0.353124	-5.98249	2.19749e-09	8.84757e-08	66.35	164.605	101.397	460.315	9.81732	130.098	175.565	70.8603	15.7425	161.06	17.9474	19.3432	49.7764	100.159	722.509	90.7302	24.9496	210.675	178.161	23.2991	136.02	96.1423	26.5724	204.208	66.8265	467.682	191.662	175.342	217.649	47.6102	28.51	645.09	241.664	169.606	12.513	209.142	8.41729
ENSSSCG00000024697	TMEM125	transmembrane protein 125	80.7049	-2.11097	0.363974	-5.79979	6.63979e-09	2.29522e-07	29.4889	106.886	52.2045	110.315	89.7584	161.447	160.858	41.247	29.1236	69.5224	18.7632	10.2405	14.9329	64.4701	26.1148	38.6277	33.2661	73.1732	390.415	33.0071	93.9419	111.839	12.4005	293.473	47.4252	105.924	204.44	16.8598	1.34351	15.8701	37.4703	105.462	96.8784	158.042	26.4163	72.2961	32.1387
ENSSSCG00000000214	GPD1	glycerol-3-phosphate dehydrogenase 1	1464.6	-2.105	0.161212	-13.0574	5.76899e-39	3.33697e-35	516.977	1090.24	494.939	2410.89	400.406	2083.93	2341.18	2493.86	761.148	2065.98	671.395	587.124	542.563	491.585	1791.47	408.735	648.69	868.429	1566.06	777.608	2510.01	2457.52	597.584	3146.27	2736.65	2412.92	1760.1	418.124	506.505	437.309	411.359	2962.18	2106.84	4907	651.369	2481.3	674.148
ENSSSCG00000024429	SIDT1	SID1 transmembrane family member 1	39.3951	-2.09977	0.492358	-4.26472	2.00152e-05	0.000203829	7.37223	9.61975	16.0629	125.358	0	23.5118	30.3333	11.6338	8.65836	34.7612	22.0263	2.27567	22.3994	28.7813	85.3083	3.59328	18.0192	76.3896	7.69833	0.970796	28.3783	18.6398	9.44796	116.166	29.1019	103.231	106.213	28.0997	98.0765	28.2135	10.5894	197.838	78.7802	9.63668	6.25648	50.349	3.82604
ENSSSCG00000031851	CBR2	carbonyl reductase 2	426.719	-2.09593	0.356452	-5.87998	4.10306e-09	1.5149e-07	150.209	397.617	46.1809	262.751	113.6	453.777	438.454	242.194	66.1184	418.293	101.974	185.467	108.264	65.6214	668.538	61.984	408.896	203.438	1006.28	20.3867	1928.74	808.381	15.9434	811.941	149.821	412.925	427.247	614.822	200.184	253.039	175.133	1151.62	1445.72	1360.7	75.0778	490.58	46.6777
ENSSSCG00000004041	SLC22A1	solute carrier family 22 member 1	909.814	-2.09427	0.427842	-4.89497	9.83222e-07	1.62339e-05	94.9174	125.057	168.661	1382.95	5.6099	611.306	255.535	2743.46	24.4008	3078.69	47.3158	200.259	429.321	239.46	1589.52	44.916	23.5635	459.946	624.664	11.6496	654.657	3723.06	29.5249	579.609	5514.26	1929.08	678.804	519.283	431.268	394.988	69.2387	1626.58	614.273	2376.41	15.2936	2334.13	11.4781
ENSSSCG00000033887	PLA2G2E	phospholipase A2 group IIE	6.81209	-2.09089	0.513913	-4.06856	4.73053e-05	0.000421401	0.921528	5.34431	3.0118	46.1318	3.50619	6.2698	17.4646	2.11523	1.57425	4.63483	5.71053	2.27567	7.46646	2.3025	15.6689	0	1.38609	4.82461	1.09976	5.82478	19.5712	8.8294	8.26697	8.55962	5.38923	5.38598	3.99296	4.49595	6.71757	0.88167	0	7.69797	8.51678	11.564	4.17099	1.291	9.18249
ENSSSCG00000021938	UPP2	uridine phosphorylase 2	1063.25	-2.08502	0.507584	-4.10772	3.99577e-05	0.000365902	291.203	1420.52	109.429	2497.13	35.7631	1579.21	1379.7	1402.4	99.1775	4024.19	132.158	1250.48	227.727	199.167	790.407	51.2042	29.1079	778.37	5248.06	52.423	1629.3	1489.23	18.8959	1197.12	904.313	507.18	329.02	1592.69	511.879	882.552	81.4573	2076.91	1958.86	1892.64	31.2824	2603.95	35.1996
ENSSSCG00000000368	MMP19	matrix metallopeptidase 19	152.295	-2.08344	0.337426	-6.17451	6.637e-10	3.10436e-08	53.4486	136.814	41.1613	226.648	71.5262	180.257	253.697	132.202	90.5192	169.171	46.5	20.4811	53.5096	48.3526	22.6328	100.612	15.247	169.665	87.9809	22.3283	514.723	445.394	99.2036	496.458	476.408	301.615	226.8	52.8274	45.6795	59.0719	45.6161	244.026	142.656	375.831	21.5501	121.354	22.9562
ENSSSCG00000006001	ENPP2	ectonucleotide pyrophosphatase/phosphodiesterase 2	181.064	-2.08023	0.331534	-6.27456	3.50632e-10	1.76363e-08	39.6257	105.817	36.1416	138.395	93.9658	191.229	239.909	284.499	281.79	251.44	143.579	72.8216	37.3323	34.5376	34.8197	35.0345	9.70262	167.253	542.182	60.1894	432.524	501.314	119.871	223.773	624.073	74.506	61.4916	55.0754	52.397	93.4571	57.8347	179.363	327.896	508.817	144.594	322.75	119.372
ENSSSCG00000000029	SCUBE1	signal peptide, CUB domain and EGF like domain containing 1	31.1212	-2.07723	0.389964	-5.32671	1.00007e-07	2.34834e-06	6.4507	18.1706	7.02753	72.2063	4.20742	18.0257	42.2828	52.8808	19.6781	83.4269	16.3158	4.55135	3.73323	10.3613	3.48197	5.38992	27.7218	16.8861	32.9928	10.6788	43.0567	66.711	14.7624	101.493	56.048	20.6462	31.9437	0	8.06108	3.52668	28.51	36.9503	36.1963	106.003	27.1114	103.28	10.7129
ENSSSCG00000008453	ABCG8	ATP binding cassette subfamily G member 8	769.039	-2.07674	0.364804	-5.69275	1.25008e-08	3.98763e-07	124.406	429.682	291.141	759.169	371.656	694.381	1146.23	1105.21	1020.9	1811.06	407.079	216.189	350.923	128.94	510.109	30.5429	47.127	347.372	1645.24	107.758	1309.31	2554.64	67.3167	979.465	3084.8	513.463	385.72	78.6792	309.008	267.146	47.2452	591.204	773.962	3342	248.174	2090.13	267.058
ENSSSCG00000016679		gamma-glutamylcyclotransferase	175.408	-2.07673	0.269326	-7.71082	1.25016e-14	2.08597e-12	61.7424	49.1676	54.2124	110.315	58.2027	161.447	228.878	304.594	234.563	487.816	97.8948	22.7567	42.3099	55.2601	102.718	49.4076	55.4436	85.2347	465.199	86.4009	291.611	534.669	72.0407	251.897	447.306	187.612	98.2269	19.1078	42.9924	32.6218	29.3246	233.249	158.625	643.73	85.5052	453.141	94.8858
ENSSSCG00000003062	LYPD3	LY6/PLAUR domain containing 3	55.5407	-2.06888	0.405747	-5.09894	3.41558e-07	6.65961e-06	0.921528	19.2395	47.1849	52.149	24.5433	56.4282	80.8888	49.708	36.2077	165.695	29.3684	4.55135	3.73323	24.1763	6.96394	9.88151	6.93044	18.4943	97.8787	17.4743	77.3063	189.342	8.26697	83.1506	176.767	54.7574	28.7493	5.61994	5.37406	7.05336	14.6623	70.0516	25.5503	360.412	28.5017	143.301	23.7214
ENSSSCG00000018452	sscmir1351	ssc-mir-135-1	1.46924	-2.05732	0.769246	-2.67446	0.00748497	0.0271276	0.921528	2.13772	0	4.01146	0	0.783725	0.91919	1.05762	2.36137	3.47612	0	0	0	0	0	1.79664	0	6.43281	1.09976	0	3.91424	1.96209	0	4.89121	3.23354	2.69299	2.39578	0	2.68703	0.88167	0.814573	0.769797	3.19379	1.92734	0	0	0
ENSSSCG00000015391	CROT	carnitine O-octanoyltransferase	1278.05	-2.05619	0.257941	-7.97155	1.5669e-15	3.44183e-13	339.122	1280.5	359.408	1010.89	612.18	1297.85	1772.2	2119.46	624.976	1804.11	361.395	469.927	538.829	377.611	934.909	408.735	357.611	697.96	6572.17	457.245	2694.96	4675.66	615.889	2389.36	2297.97	842.008	1155.56	214.682	266.016	255.684	325.014	970.714	799.513	3245.63	406.671	3330.78	404.795
ENSSSCG00000027997	NME5	NME/NM23 family member 5	7.15669	-2.05551	0.536359	-3.83234	0.000126932	0.000969475	0	1.06886	0	16.0458	8.41485	7.83725	24.8181	11.6338	9.44548	8.11095	1.63158	0	0	4.60501	1.74099	6.28823	6.93044	4.02051	20.8955	7.76637	6.84993	4.90522	4.13348	14.6736	4.31139	7.1813	15.1733	0	0	1.76334	2.44372	11.547	9.58138	19.2734	7.64681	2.582	11.4781
ENSSSCG00000049508		-	13.5103	-2.05337	0.459117	-4.47243	7.73361e-06	9.14801e-05	10.1368	18.1706	9.0354	26.0745	7.71361	10.9722	52.3939	6.3457	18.891	12.7458	16.3158	0	4.97764	3.45376	6.96394	1.79664	4.15827	0	30.7933	4.85398	40.121	22.564	9.44796	7.33682	18.3234	5.38598	7.18733	3.37196	10.7481	7.93503	0.814573	20.7845	43.6485	23.128	4.17099	24.529	4.59125
ENSSSCG00000015333	ASB4	ankyrin repeat and SOCS box containing 4	84.3419	-2.05079	0.354582	-5.78369	7.30791e-09	2.50127e-07	39.6257	84.4401	6.0236	148.424	42.0742	137.152	80.8888	162.873	85.0093	154.108	59.5527	32.9973	31.1102	12.6638	69.6394	1.79664	2.77218	77.1937	138.57	17.4743	162.441	165.796	11.81	162.633	218.803	91.5616	40.7282	94.415	29.5573	81.1137	13.8477	132.405	117.106	148.405	43.1002	178.158	44.382
ENSSSCG00000030709		2-acylglycerol O-acyltransferase 2-A	415.658	-2.05043	0.390865	-5.24589	1.5553e-07	3.4381e-06	38.7042	214.841	65.2557	365.043	17.5309	127.747	295.979	1610.75	125.153	1567.73	94.6317	167.262	97.0639	58.7139	320.341	12.5765	30.494	116.595	841.317	44.6566	238.769	973.196	36.6109	509.909	907.547	208.258	187.669	206.814	177.344	84.6404	7.33115	359.495	161.819	3515.46	39.6244	1523.38	29.0779
ENSSSCG00000021573	KCNJ5	potassium inwardly rectifying channel subfamily J member 5	3.78354	-2.04553	0.55947	-3.6562	0.000255984	0.00173723	0.921528	0	0	4.01146	1.40247	3.1349	0.91919	5.28808	10.2326	4.63483	3.26316	0	1.24441	0	3.48197	1.79664	1.38609	3.2164	7.69833	12.6204	12.7213	7.84835	11.2195	8.55962	3.23354	6.28364	4.79156	0	0	0.88167	3.25829	5.38858	2.1292	0	2.78066	2.582	3.06083
ENSSSCG00000014047	FGFR4	fibroblast growth factor receptor 4	721.152	-2.04272	0.229778	-8.88999	6.11149e-19	3.02475e-16	140.072	354.862	203.798	701.003	499.982	953.01	1290.54	1073.48	1003.58	1481.99	731.764	170.676	119.463	157.722	257.666	175.172	191.28	561.263	762.134	585.39	1340.63	1572.61	444.645	1308.4	1947.67	755.832	670.019	164.102	127.634	205.429	299.763	1028.45	750.541	2156.69	523.459	1427.85	544.063
ENSSSCG00000010969	GALT	galactose-1-phosphate uridylyltransferase	2269.73	-2.028	0.259978	-7.80066	6.15843e-15	1.12492e-12	407.315	1072.07	683.679	2597.42	1042.74	2370.77	3466.27	3158.04	1233.42	4385.71	974.869	616.708	501.497	683.844	1418.9	552.466	1323.71	1267.26	7292.51	1416.39	3166.62	6139.38	396.814	4151.42	3409.23	1770.19	2011.65	479.943	581.742	537.819	622.334	2671.2	2371.92	11323.1	1005.21	5930.86	945.032
ENSSSCG00000025483	GREB1	growth regulating estrogen receptor binding 1	5.63536	-2.02399	0.585578	-3.4564	0.000547442	0.00325112	0	7.48203	3.0118	4.01146	5.6099	7.05353	8.27271	4.23047	2.36137	2.31741	15.5	2.27567	0	0	3.48197	0.898319	2.77218	41.8133	1.09976	3.88319	4.89281	6.86731	4.72398	1.2228	20.4791	9.87429	5.59015	5.61994	0	2.64501	0.814573	11.547	5.32299	3.85467	4.86615	2.582	1.53042
ENSSSCG00000025783	ENTPD3	ectonucleoside triphosphate diphosphohydrolase 3	32.5022	-2.02105	0.408295	-4.94998	7.42193e-07	1.27518e-05	2.76458	40.6167	8.03147	23.0659	41.373	67.4004	43.2019	17.9795	103.9	33.6025	27.7369	4.55135	1.24441	8.05877	5.22296	7.18655	5.54436	53.8748	29.6935	53.3938	84.1563	70.6352	27.7534	64.8086	78.6828	35.9065	65.4846	2.24798	2.68703	14.9884	20.3643	30.0221	29.8087	19.2734	24.3308	15.492	37.4952
ENSSSCG00000023258	CLEC4F	C-type lectin domain family 4 member F	138.636	-2.01749	0.564584	-3.57341	0.000352365	0.00226802	48.841	20.3084	3.0118	40.1146	14.726	16.4582	36.7676	341.61	282.577	617.591	141.947	9.1027	2.48882	4.60501	5.22296	16.1697	18.0192	33.7723	431.106	534.909	158.527	212.887	563.925	81.9278	431.139	29.6229	15.9719	0	22.8397	1.76334	3.25829	19.2449	10.646	325.72	88.9811	435.067	108.659
ENSSSCG00000042058		-	8.6021	-2.01514	0.478966	-4.20726	2.58486e-05	0.000252704	0.921528	2.13772	3.0118	26.0745	4.20742	9.4047	8.27271	10.5762	11.0197	27.809	6.52632	3.41351	3.73323	2.3025	5.22296	1.79664	0	0.804101	25.2945	4.85398	4.89281	16.6778	1.181	13.4508	25.8683	8.07897	3.99296	2.24798	4.03054	1.76334	0	8.46777	5.32299	19.2734	2.08549	37.439	6.12166
ENSSSCG00000051325		-	4.51359	-2.0079	0.555519	-3.61446	0.000300977	0.0019889	1.84306	3.20658	0	2.00573	0.701237	5.48608	4.59595	4.23047	0.787123	5.79354	1.63158	0	2.48882	2.3025	12.1869	0.898319	1.38609	2.4123	1.09976	0	7.82849	12.7536	0.590498	26.9017	9.70062	13.4649	0.798593	3.37196	2.68703	4.40835	1.62915	3.84899	4.25839	13.4914	4.86615	2.582	0.765208
ENSSSCG00000033412	B4GALNT3	beta-1,4-N-acetyl-galactosaminyltransferase 3	23.304	-2.00764	0.304199	-6.59976	4.11824e-11	2.65933e-09	8.29375	78.0269	13.0511	29.0831	9.11608	42.3212	45.0403	9.51855	18.891	22.0154	20.3948	2.27567	7.46646	19.5713	22.6328	0.898319	4.15827	19.2984	24.1947	26.2115	47.9495	15.6967	21.2579	12.228	28.024	23.3392	21.562	11.2399	22.8397	13.2251	12.2186	49.267	92.62	15.4187	23.6356	15.492	13.7737
ENSSSCG00000034345	SPRY3	sprouty RTK signaling antagonist 3	45.1972	-2.00421	0.391569	-5.11841	3.08125e-07	6.12492e-06	1.84306	14.9641	14.0551	13.0372	48.3854	89.3447	74.4544	117.395	23.6137	76.4747	34.2632	10.2405	1.24441	3.45376	12.1869	14.3731	1.38609	32.164	68.1852	18.4451	72.4135	177.569	22.4389	68.477	183.234	27.8276	33.5409	11.2399	6.71757	18.5151	15.4769	79.2891	35.1317	136.841	12.513	87.7881	13.7737
ENSSSCG00000041094		-	3.02238	-2.00077	0.830799	-2.40825	0.0160293	0.0498399	2.76458	0	0	3.0086	0	2.35118	2.75757	0	7.08411	32.4438	0	0	0	1.15125	0	0	0	1.6082	1.09976	0.970796	0.978561	7.84835	2.36199	1.2228	9.70062	3.59065	1.59719	0	0	0	0	0.769797	1.0646	9.63668	2.08549	14.201	1.53042
ENSSSCG00000010084		stromal cell derived factor 2 like 1	2140.67	-1.99428	0.335404	-5.94592	2.74913e-09	1.07204e-07	916.921	4210.25	394.546	4235.1	794.502	3156.85	4635.48	891.571	162.147	703.335	133.79	473.34	564.962	691.903	3189.48	3701.97	3192.16	614.333	9167.61	238.816	7735.53	2371.18	113.966	6413.6	648.864	3292.63	1946.97	493.431	1094.96	698.283	771.4	4128.42	4674.65	1956.25	152.936	491.871	150.746
ENSSSCG00000006935	CLCA2	chloride channel accessory 2	27.093	-1.9913	0.347355	-5.73275	9.88174e-09	3.22934e-07	5.52917	44.8922	7.02753	72.2063	4.20742	39.97	47.7979	60.2841	28.3364	76.4747	12.2369	12.5162	14.9329	9.21002	10.4459	1.79664	11.0887	12.8656	36.2921	16.5035	20.5498	74.5594	7.08597	79.4822	50.6588	16.1579	46.3184	15.7358	17.4657	4.40835	4.07286	31.5617	36.1963	28.91	1.39033	34.857	8.41729
ENSSSCG00000005701	ASS1	argininosuccinate synthase 1	12958.7	-1.98849	0.289717	-6.86359	6.71528e-12	5.54906e-10	2409.8	4102.29	4157.29	19863.8	4294.38	8269.08	14545.3	13548.1	2699.83	16151.2	2072.92	3288.35	3322.57	5604.3	6208.35	7619.54	2155.37	8064.33	33231.5	1289.22	28878.3	47653.2	1185.13	39788.8	36380.5	12476.6	13901.1	7237.36	3268.77	3524.92	2632.7	13521.5	15586.8	58001.3	1263.81	29965.4	1308.51
ENSSSCG00000011254	XYLB	xylulokinase	97.546	-1.98444	0.326379	-6.08017	1.20054e-09	5.22131e-08	15.666	10.6886	11.0433	56.1604	16.1285	43.1049	90.9998	156.527	60.6085	499.403	23.6579	1.13784	11.1997	29.9326	31.3377	17.0681	18.0192	30.5558	145.168	44.6566	60.6708	225.64	18.8959	134.508	393.414	80.7897	31.9437	21.3558	22.8397	12.3434	21.9935	70.0516	34.0671	439.433	49.3567	639.046	39.7908
ENSSSCG00000009748	RIMBP2	RIMS binding protein 2	2.62768	-1.97613	0.770267	-2.56552	0.0103022	0.0350881	0	1.06886	0	0	2.80495	1.56745	1.83838	3.17285	1.57425	11.5871	2.44737	0	0	1.15125	0	0.898319	0	0.804101	6.59857	7.76637	0.978561	4.90522	5.31448	2.44561	8.62277	0.897663	0.798593	0	0	0	0	6.15838	2.1292	9.63668	2.78066	7.74601	1.53042
ENSSSCG00000009429	TNFSF11	TNF superfamily member 11	5.44982	-1.97301	0.603837	-3.26745	0.00108522	0.00573266	0.921528	5.34431	5.01967	11.0315	1.40247	3.91863	19.303	6.3457	5.50986	0	0.81579	3.41351	6.22205	0	3.48197	2.69496	0	2.4123	28.5938	7.76637	9.78561	16.6778	2.36199	12.228	2.15569	9.87429	0.798593	0	2.68703	0	3.25829	4.61878	7.45218	13.4914	0	1.291	0.765208
ENSSSCG00000007336		neuronatin	206.125	-1.95964	0.276329	-7.09172	1.32455e-12	1.41012e-10	34.0965	109.024	80.3147	117.335	197.749	280.574	258.292	209.408	199.142	180.758	225.158	27.3081	72.1758	21.8738	255.925	39.526	66.5323	418.133	382.717	203.867	311.182	447.356	135.224	438.986	393.414	254.039	321.833	37.0916	145.1	67.007	83.0864	227.09	289.571	212.007	246.783	361.48	275.475
ENSSSCG00000003547	NCMAP	non-compact myelin associated protein	7.28794	-1.95376	0.415104	-4.70668	2.5179e-06	3.60475e-05	0	10.6886	5.01967	21.0602	2.80495	10.9722	8.27271	15.8642	2.36137	3.47612	0.81579	0	2.48882	1.15125	10.4459	2.69496	0	6.43281	5.4988	2.91239	8.80705	15.6967	5.90498	4.89121	18.3234	4.48831	7.18733	3.37196	6.71757	4.40835	4.07286	9.23757	18.0982	32.7647	1.39033	9.03701	2.29562
ENSSSCG00000046741		-	6.47187	-1.94828	0.539141	-3.61368	0.000301883	0.00199261	0	4.27545	1.00393	7.02006	2.10371	7.05353	10.1111	6.3457	6.29699	13.9045	4.07895	3.41351	1.24441	2.3025	1.74099	0	0	8.84511	0	0.970796	0	12.7536	3.54299	8.55962	12.9342	6.28364	6.38874	0	1.34351	7.93503	1.62915	10.0074	1.0646	19.2734	6.25648	47.767	13.0085
ENSSSCG00000030561	LMTK3	lemur tyrosine kinase 3	34.3689	-1.9428	0.400489	-4.85106	1.22803e-06	1.98048e-05	7.37223	18.1706	27.1062	34.0974	11.921	54.8608	43.2019	28.5556	8.65836	61.4115	30.1842	5.68918	3.73323	21.8738	5.22296	22.458	20.7913	52.2666	29.6935	10.6788	107.642	23.5451	5.90498	135.731	25.8683	87.0733	60.693	12.3639	6.71757	33.5035	4.07286	82.3683	30.8733	77.0935	6.95165	71.0051	2.29562
ENSSSCG00000036236	ELOVL6	ELOVL fatty acid elongase 6	863.593	-1.94123	0.255432	-7.59979	2.96616e-14	4.59569e-12	156.66	609.251	215.846	1499.28	284.001	693.597	712.373	1273.37	568.303	1787.89	198.237	224.154	118.219	889.918	1156.01	362.921	138.609	798.472	1346.11	377.64	811.227	1865.95	226.161	1303.51	3218.45	1237.88	736.302	211.31	151.817	464.64	250.888	1480.32	1825.78	2129.71	346.192	1922.3	359.648
ENSSSCG00000050572		-	30.0431	-1.93868	0.315505	-6.14468	8.01234e-10	3.66855e-08	9.21528	20.3084	24.0944	29.0831	16.8297	65.0492	30.3333	32.7861	11.8069	47.507	13.8684	2.27567	7.46646	5.75626	19.1508	8.08487	4.15827	38.5969	29.6935	11.6496	73.3921	51.9954	14.1719	97.8242	57.1259	38.5995	27.9507	6.74393	6.71757	35.2668	28.51	66.9724	57.4883	52.0381	13.9033	49.058	6.12166
ENSSSCG00000025834	FNDC5	fibronectin type III domain containing 5	96.9729	-1.93751	0.552658	-3.50581	0.000455221	0.00278738	28.5674	49.1676	97.3815	155.444	18.2322	46.2398	144.313	174.507	173.167	330.232	17.9474	11.3784	55.9984	46.0501	146.243	1.79664	4.15827	4.82461	161.665	17.4743	58.7137	302.162	18.8959	75.8138	506.588	69.12	19.1662	0	18.8092	10.58	3.25829	125.477	54.2945	379.685	2.78066	251.745	6.12166
ENSSSCG00000017637	MPO	myeloperoxidase	56.6888	-1.93195	0.486396	-3.97198	7.12791e-05	0.000591544	46.9979	102.611	19.0747	40.1146	11.921	38.4025	35.8484	34.9013	44.866	17.3806	3.26316	7.96486	21.155	24.1763	19.1508	6.28823	4.15827	119.007	52.7885	5.82478	581.265	96.1423	46.6493	264.125	51.7366	69.12	126.976	23.6038	17.4657	12.3434	46.4306	10.7772	35.1317	13.4914	7.64681	34.857	3.82604
ENSSSCG00000002013	DHRS4	dehydrogenase/reductase (SDR family) member 4	5112.23	-1.9288	0.271308	-7.10929	1.16644e-12	1.27304e-10	443.255	1726.21	918.599	3140.97	1945.93	3075.34	4204.38	20164.5	3152.43	11212.8	2807.13	1748.86	856.154	527.274	2327.7	799.504	576.613	2064.93	11550.8	3312.36	6978.12	16725.8	3323.91	7301.36	15671.9	2578.99	2878.93	1442.08	1706.26	1123.25	871.593	3507.2	3330.06	27167.7	1746.95	14535.4	1707.18
ENSSSCG00000001906	CYP1A1	cytochrome P450 1A1	3843.25	-1.92497	0.509396	-3.77894	0.000157499	0.0011576	404.551	2524.65	721.828	5296.13	4290.87	18892.5	2393.57	6767.69	5004.53	4940.73	5292.85	312.905	583.628	582.534	621.532	313.513	116.431	757.463	3599.52	1676.57	4150.08	3081.46	1381.76	1184.9	5530.43	3201.96	2263.21	431.611	1065.41	14899.3	941.646	2026.88	22238.4	5544.95	2159.18	4730.23	2274.96
ENSSSCG00000033558	GABRB2	gamma-aminobutyric acid type A receptor beta2 subunit	3.70475	-1.91757	0.692065	-2.77079	0.00559208	0.0214215	2.76458	2.13772	0	3.0086	1.40247	6.2698	1.83838	24.3252	10.2326	19.698	3.26316	0	0	0	0	0	0	2.4123	3.29928	3.88319	0	4.90522	4.72398	1.2228	12.9342	0.897663	0	0	0	0.88167	0	0	4.25839	5.78201	2.78066	10.328	3.82604
ENSSSCG00000030626	ALDH1L1	aldehyde dehydrogenase 1 family member L1	255.281	-1.91731	0.369332	-5.19128	2.0885e-07	4.38231e-06	40.5472	251.182	87.3422	300.86	147.961	429.481	334.585	154.412	28.3364	201.615	50.579	93.3026	55.9984	57.5626	66.1574	107.798	79.0071	467.183	67.0854	43.6858	988.347	749.518	20.6674	1091.96	674.732	412.925	392.109	383.28	71.2062	201.021	185.723	337.941	306.604	156.114	104.97	194.941	108.659
ENSSSCG00000022951	NFASC	neurofascin	11.6412	-1.91717	0.419836	-4.56647	4.96011e-06	6.38048e-05	1.84306	10.6886	3.0118	21.0602	1.40247	3.91863	11.9495	3.17285	5.50986	4.63483	8.1579	1.13784	9.95528	9.21002	26.1148	2.69496	2.77218	23.3189	20.8955	0	8.80705	19.6209	2.95249	6.11401	20.4791	17.9533	19.1662	11.2399	4.03054	6.17169	4.07286	26.9429	7.45218	40.4741	4.17099	58.095	1.53042
ENSSSCG00000033542	VSTM1	V-set and transmembrane domain-containing protein 1	3.33781	-1.91687	0.637681	-3.006	0.00264705	0.011706	0.921528	2.13772	0	5.01433	2.80495	4.70235	2.75757	4.23047	2.36137	8.11095	0.81579	0	3.73323	1.15125	0	0	0	2.4123	6.59857	6.79557	9.78561	6.86731	11.2195	2.44561	9.70062	0.897663	1.59719	0	1.34351	0	0.814573	4.61878	3.19379	3.85467	4.86615	7.74601	0
ENSSSCG00000017492	ORMDL3	ORMDL sphingolipid biosynthesis regulator 3	389.228	-1.91642	0.294869	-6.4992	8.07463e-11	4.7986e-09	209.187	480.988	147.578	759.169	213.176	888.744	641.595	359.59	347.121	460.007	163.158	150.194	95.8195	187.654	186.285	173.376	24.9496	550.809	217.753	32.0363	1116.54	741.67	132.862	918.325	966.828	589.765	517.488	231.542	158.535	251.276	192.239	765.948	638.759	312.228	83.4198	376.972	117.842
ENSSSCG00000005780	KCNG2	potassium voltage-gated channel modifier subfamily G member 2	4.72326	-1.91172	0.504082	-3.79248	0.000149149	0.00110417	4.60764	14.9641	2.00787	17.0487	2.10371	4.70235	10.1111	6.3457	0	13.9045	0	0	1.24441	2.3025	6.96394	5.38992	0	4.02051	7.69833	0	9.78561	21.583	0.590498	4.89121	5.38923	5.38598	3.99296	2.24798	0	0	1.62915	3.84899	6.38759	1.92734	1.39033	0	2.29562
ENSSSCG00000016402	AGXT	alanine--glyoxylate and serine--pyruvate aminotransferase	10690.2	-1.91009	0.249165	-7.66596	1.77497e-14	2.90576e-12	2294.61	13709.2	8943.04	29982.7	3117	15854.8	23304.2	12806.7	3127.24	12322.9	3431.21	3840.2	4345.48	10020.5	23635.6	3154.9	7121.73	6788.22	14123.1	3258.96	19352	13097.9	676.71	24750.8	10192.1	13638.2	17055.5	4628.58	5892.65	2984.45	2150.47	21673.6	16205.3	20283.3	3078.19	11996	2698.12
ENSSSCG00000010589	SFXN2	sideroflexin 2	217.111	-1.90996	0.329834	-5.79067	7.01061e-09	2.40425e-07	87.5452	340.967	34.1337	292.837	245.433	419.293	402.605	203.062	302.255	326.755	173.763	87.6134	36.0879	42.5963	41.7836	78.1538	13.8609	281.435	142.969	66.9849	421.76	371.816	93.8891	540.479	261.917	405.744	424.851	189.954	81.9543	158.701	169.431	407.223	384.32	94.4395	120.959	135.555	149.981
ENSSSCG00000031594		nicolin 1	74.4508	-1.90916	0.354533	-5.38501	7.24417e-08	1.79327e-06	28.5674	64.1317	18.0708	77.2206	53.294	102.668	116.737	92.0126	58.2471	137.886	60.3685	7.96486	7.46646	8.05877	8.70493	22.458	1.38609	75.5855	69.2849	12.6204	156.57	312.953	41.3348	150.405	281.318	82.585	73.4705	34.8436	24.1833	34.3851	57.8347	64.663	66.005	90.5848	32.6727	176.867	51.2689
ENSSSCG00000001045	ELOVL2	ELOVL fatty acid elongase 2	2243.43	-1.90806	0.223096	-8.55262	1.20325e-17	4.63999e-15	606.366	1205.68	461.809	2744.84	1718.73	2862.16	3281.51	3813.76	1926.88	3974.37	636.316	444.894	861.131	413.3	2204.09	779.741	512.853	2594.83	3873.36	1678.51	1953.21	8322.2	891.651	2603.35	8812.47	2534.1	1784.06	300.105	643.543	719.443	510.737	2501.84	2824.38	4833.76	1158.84	4837.38	1180.72
ENSSSCG00000010523	HOGA1	4-hydroxy-2-oxoglutarate aldolase 1	183.467	-1.90048	0.328085	-5.79266	6.92799e-09	2.38535e-07	54.3702	117.575	24.0944	210.602	89.7584	152.826	190.272	260.174	130.662	506.355	104.421	42.1	29.8658	72.5289	5.22296	59.2891	52.6714	134.285	433.306	67.9557	384.575	626.887	50.7828	520.914	568.025	191.202	162.913	59.5714	26.8703	56.4269	86.3447	188.6	110.718	260.19	51.4422	649.374	55.095
ENSSSCG00000038056		beta-1,3-galactosyltransferase 5	10.3571	-1.89997	0.591358	-3.21289	0.00131406	0.00671461	1.84306	8.55089	2.00787	8.02292	7.71361	17.242	9.1919	0	1.57425	1.15871	4.89474	1.13784	4.97764	0	6.96394	2.69496	0	89.2552	0	0.970796	19.5712	20.6019	0.590498	22.0105	30.1797	16.1579	19.1662	23.6038	10.7481	7.93503	4.07286	13.0866	7.45218	3.85467	4.17099	6.45501	5.35645
ENSSSCG00000010432	ASAH2	N-acylsphingosine amidohydrolase 2	104.641	-1.89961	0.447613	-4.24387	2.19698e-05	0.000220882	0	12.8263	9.0354	13.0372	6.31114	14.1071	44.1211	239.021	47.2274	402.071	5.71053	6.82702	6.22205	4.60501	19.1508	3.59328	5.54436	10.4533	150.667	2.91239	41.0996	574.892	9.44796	29.3473	851.499	10.772	5.59015	0	4.03054	3.52668	1.62915	12.3168	2.1292	865.374	2.08549	587.405	4.59125
ENSSSCG00000005166	MLLT3	MLLT3 super elongation complex subunit	128.819	-1.89945	0.201014	-9.44935	3.40939e-21	2.46513e-18	52.5271	106.886	71.2793	247.708	54.6965	176.338	205.899	209.408	96.029	183.076	35.8948	46.6513	58.4872	52.9576	168.876	37.7294	60.9879	184.943	246.346	37.8611	188.862	324.726	25.9819	370.509	164.91	121.184	166.906	42.7116	61.8016	42.3202	35.8412	234.018	97.943	210.08	47.2712	232.38	64.2775
ENSSSCG00000005361	ALDH1B1	aldehyde dehydrogenase 1 family member B1	550.819	-1.89631	0.237091	-7.99824	1.26211e-15	2.88175e-13	143.758	183.844	224.881	951.719	283.3	699.083	591.959	832.344	397.497	1023.14	248	84.1999	105.775	290.116	268.112	280.276	138.609	517.037	893.006	178.627	1001.07	1361.69	175.968	892.646	1604.91	908.435	606.93	178.714	111.512	222.181	203.643	956.858	695.182	1555.36	168.23	1247.11	154.572
ENSSSCG00000043963		-	4.73003	-1.89321	0.615948	-3.07365	0.00211454	0.00981114	5.52917	6.41317	0	1.00287	1.40247	13.3233	23.8989	11.6338	9.44548	12.7458	12.2369	2.27567	0	0	3.48197	0.898319	0	12.8656	0	0.970796	5.87137	7.84835	1.181	1.2228	5.38923	0.897663	3.99296	3.37196	1.34351	5.29002	0	3.84899	7.45218	1.92734	2.08549	5.164	0
ENSSSCG00000043852		-	4.60118	-1.89234	0.552003	-3.42813	0.000607753	0.00354947	0.921528	5.34431	1.00393	12.0344	1.40247	6.2698	11.0303	2.11523	5.50986	13.9045	4.89474	1.13784	0	3.45376	0	0	0	1.6082	9.89785	0	0.978561	3.92418	2.95249	3.66841	9.70062	4.48831	7.18733	5.61994	1.34351	4.40835	0.814573	6.15838	0	11.564	3.47582	18.074	5.35645
ENSSSCG00000010065	GSTT4	glutathione S-transferase theta-4	58.5066	-1.88905	0.449039	-4.20686	2.58939e-05	0.000253005	3.68611	8.55089	5.01967	26.0745	9.81732	8.62098	31.2525	107.877	40.1433	110.077	9.78948	13.654	3.73323	14.9663	40.0427	5.38992	40.1966	21.7107	106.677	8.73717	54.7994	232.508	3.54299	163.856	142.276	13.4649	19.1662	13.4879	12.0916	2.64501	3.25829	29.2523	12.7752	537.727	33.3679	256.909	17.5998
ENSSSCG00000012852	CDHR5	cadherin related family member 5	278.684	-1.88789	0.318101	-5.93487	2.94081e-09	1.13642e-07	24.8813	95.1287	127.5	145.415	80.6423	291.546	694.908	175.564	77.9252	619.908	52.2106	103.543	84.6198	71.3776	214.141	45.8143	24.9496	292.693	506.99	99.0212	681.079	539.574	74.9932	306.924	1042.28	305.205	261.14	339.444	80.6108	219.536	83.901	327.934	303.41	1175.68	74.3826	606.77	59.6862
ENSSSCG00000000981	CRELD2	cysteine rich with EGF like domains 2	4051.89	-1.88462	0.355325	-5.30394	1.13329e-07	2.59878e-06	1331.61	9291.61	1124.41	7644.84	1889.83	6279.21	13352.2	1497.58	476.997	740.414	428.29	814.691	949.484	1321.64	4291.53	7577.32	7846.65	1227.86	10313.6	635.872	20963.7	2041.55	307.059	12158.3	588.504	8210.92	5955.11	709.237	1789.56	1051.83	1792.06	4733.48	7509.67	1763.51	445.601	435.067	429.282
ENSSSCG00000015276	ETNK2	ethanolamine kinase 2	1727.7	-1.87861	0.257201	-7.30407	2.79185e-13	3.43595e-11	369.533	1091.31	1288.05	2951.43	770.66	1515.72	2047.04	1972.45	1387.7	3530.58	812.527	304.94	512.697	1129.38	1185.61	708.774	381.174	1331.59	3043.04	337.837	4027.76	3319.85	363.747	3791.91	2730.18	1914.72	1577.22	758.692	394.993	891.369	664.691	3986.78	2950	5186.46	558.217	3525.72	610.636
ENSSSCG00000005661	ENDOG	endonuclease G	63.1185	-1.8669	0.340314	-5.48581	4.11569e-08	1.10557e-06	23.9597	76.958	16.0629	128.367	50.4891	102.668	129.606	70.8603	19.6781	119.347	32.6316	6.82702	11.1997	37.9913	8.70493	31.4412	1.38609	42.6174	71.4845	10.6788	137.977	139.308	15.3529	176.084	81.9163	33.2135	98.2269	38.2156	24.1833	52.9002	39.9141	100.074	135.204	177.315	6.95165	74.8781	10.7129
ENSSSCG00000015331	PON2	paraoxonase 2	431.875	-1.86085	0.219979	-8.45919	2.69249e-17	9.16132e-15	129.014	444.646	197.775	465.329	331.685	518.042	529.454	750.908	410.091	879.459	248.816	108.095	93.3307	77.1339	201.954	176.071	63.7601	591.014	1104.16	248.524	703.586	732.84	205.493	781.371	1040.12	447.934	420.858	201.194	122.26	218.654	181.65	481.893	529.105	1060.03	192.561	894.664	195.893
ENSSSCG00000009225	HSD17B11	estradiol 17-beta-dehydrogenase 11	2750.91	-1.85795	0.194822	-9.53666	1.47502e-21	1.16346e-18	749.202	1655.67	1292.06	6912.75	1191.4	4844.99	5340.5	4269.6	1491.6	4189.89	1144.55	1440.5	922.107	1325.09	2552.28	819.267	711.064	2356.02	4612.4	970.796	4380.04	5623.35	777.095	5152.89	5154.26	3087.96	2443.69	1020.58	1214.54	2153.92	632.108	4412.48	4397.85	6504.76	998.952	4011.14	1026.14
ENSSSCG00000010267	LRRC20	leucine rich repeat containing 20	6.79105	-1.85617	0.381582	-4.86439	1.14808e-06	1.86542e-05	7.37223	8.55089	3.0118	7.02006	2.10371	10.1884	11.9495	6.3457	9.44548	12.7458	5.71053	1.13784	1.24441	3.45376	6.96394	0	0	8.84511	10.9976	3.88319	10.7642	8.8294	8.26697	14.6736	7.54492	17.0556	8.78452	1.12399	2.68703	5.29002	7.33115	12.3168	12.7752	7.70935	2.08549	0	3.06083
ENSSSCG00000012394	GJB1	gap junction protein beta 1	5242.12	-1.85456	0.187785	-9.87599	5.29066e-23	5.73805e-20	1035.8	4286.14	1610.31	9605.44	2177.34	5449.24	7065.82	5310.29	2302.34	6280.19	2754.11	1811.44	2375.58	1993.97	7477.53	1864.01	1312.63	4932.36	7105.55	2003.72	11749.6	10465.8	1126.08	10308.2	8198.1	7116.67	6272.95	4172.24	3865.29	4008.07	2455.12	10853.4	7504.35	15827.3	1990.26	7476.19	1815.07
ENSSSCG00000034811	QDPR	quinoid dihydropteridine reductase	2397	-1.85085	0.278684	-6.6414	3.10724e-11	2.13122e-09	828.454	1401.28	652.557	2224.35	1937.52	2822.98	3368.83	4668.32	1773.39	5792.38	1048.29	526.819	607.272	499.643	964.506	650.383	184.35	1093.58	5955.2	809.644	2817.28	7135.14	679.072	4218.67	7161.21	1663.37	1439.86	673.269	636.826	917.819	608.486	2675.82	2276.11	11086	439.344	6076.74	374.187
ENSSSCG00000038663		-	215.07	-1.85048	0.326188	-5.67303	1.4029e-08	4.39432e-07	9.21528	5.34431	38.1495	49.1404	37.1656	103.452	116.737	613.418	338.463	275.772	146.026	47.7892	12.4441	34.5376	69.6394	15.2714	16.6331	86.0388	201.256	327.158	152.656	676.921	235.018	166.301	813.774	166.068	82.255	22.4798	18.8092	114.617	61.9075	241.716	87.297	917.412	467.846	715.215	473.664
ENSSSCG00000003368	RNF207	ring finger protein 207	27.3116	-1.84654	0.308429	-5.98693	2.13839e-09	8.681e-08	11.9799	63.0628	11.0433	63.1805	11.921	47.0235	54.2322	8.46093	22.8266	13.9045	7.34211	20.4811	11.1997	39.1426	36.5607	3.59328	23.5635	59.5035	8.79809	1.94159	36.2068	14.7157	7.08597	69.6998	11.8563	83.4827	55.9015	12.3639	9.4046	15.8701	9.77487	82.3683	42.5839	3.85467	8.34198	18.074	9.18249
ENSSSCG00000017261	ARSG	arylsulfatase G	278.108	-1.84247	0.278757	-6.6096	3.85354e-11	2.52342e-09	42.3903	129.332	164.645	412.178	123.418	340.92	423.747	377.569	197.568	604.845	112.579	135.403	126.93	146.209	147.984	47.6109	59.6018	172.078	246.346	58.2478	456.01	694.579	50.1923	487.898	938.804	537.7	208.433	113.523	77.9238	64.3619	49.6889	531.93	393.901	955.959	52.1373	570.622	36.73
ENSSSCG00000026387		receptor accessory protein 6	431.514	-1.83803	0.346145	-5.30999	1.09634e-07	2.52653e-06	14.7445	43.8233	117.46	249.713	47.6841	155.178	201.303	464.294	70.054	659.305	80.7632	109.232	104.53	145.058	670.279	53.0008	62.374	138.305	860.013	224.254	488.302	1391.12	52.5543	325.266	1302.04	254.039	200.447	151.738	104.794	92.5754	29.3246	317.926	216.113	5207.66	64.6503	1247.11	48.9733
ENSSSCG00000032831	BRI3BP	BRI3 binding protein	716.822	-1.8377	0.246079	-7.46794	8.14604e-14	1.13999e-11	140.994	803.784	501.967	924.642	793.801	1601.15	1214.25	975.122	392.775	487.816	242.29	183.192	120.708	399.485	659.833	428.498	235.635	1576.04	570.776	152.415	1398.36	1266.53	210.808	1457.58	1300.96	1651.7	1450.24	200.07	190.779	360.603	439.055	1016.9	1293.49	805.627	196.036	655.829	222.675
ENSSSCG00000045171		-	34.6747	-1.83552	0.41313	-4.44295	8.87331e-06	0.000102615	28.5674	66.2694	7.02753	38.1089	17.5309	47.0235	87.3231	50.7656	5.50986	52.1418	12.2369	14.7919	8.71087	14.9663	5.22296	15.2714	0	122.223	23.095	0	39.1424	88.294	1.77149	96.6014	26.9462	21.5439	37.5339	39.3396	1.34351	19.3968	24.4372	30.0221	67.0696	42.4014	4.86615	123.936	1.53042
ENSSSCG00000041863		-	1.90445	-1.83343	0.681579	-2.68997	0.00714588	0.0261168	0.921528	2.13772	0	7.02006	0.701237	6.2698	0.91919	0	2.36137	0	2.44737	2.27567	0	0	0	4.4916	0	2.4123	5.4988	0.970796	2.93568	0	1.77149	2.44561	3.23354	5.38598	1.59719	0	2.68703	0	0	4.61878	1.0646	0	3.47582	1.291	1.53042
ENSSSCG00000010768	CFAP46	cilia and flagella associated protein 46	12.3528	-1.83317	0.35454	-5.17058	2.33374e-07	4.84419e-06	1.84306	8.55089	6.0236	27.0774	2.10371	20.3769	10.1111	10.5762	7.08411	25.4916	19.579	4.55135	6.22205	2.3025	10.4459	5.38992	1.38609	4.82461	16.4964	13.5911	5.87137	17.6588	7.08597	14.6736	17.2455	12.5673	7.18733	4.49595	5.37406	5.29002	5.70201	28.4825	14.9044	17.346	14.5985	68.4231	6.12166
ENSSSCG00000001419	SLC44A4	solute carrier family 44 member 4	125.965	-1.82733	0.271755	-6.72418	1.7659e-11	1.30398e-09	21.1951	118.644	100.393	264.756	119.21	188.094	317.121	45.4775	25.1879	18.5393	17.1316	21.6189	64.7093	73.6801	198.472	61.984	112.273	210.675	112.176	35.9195	292.59	87.3129	5.90498	350.944	35.5689	259.425	311.451	69.6873	51.0535	81.9954	109.153	352.567	374.738	80.9481	24.3308	29.693	16.0694
ENSSSCG00000006624	SELENBP1	selenium binding protein 1	60.8036	-1.82377	0.364231	-5.00718	5.52321e-07	9.95268e-06	12.9014	22.4461	21.0826	83.2378	22.4396	28.9978	45.9595	77.206	14.1682	199.298	13.0526	17.0676	9.95528	32.2351	66.1574	11.6782	26.3357	15.2779	158.366	37.8611	67.5207	146.176	17.7149	75.8138	59.2815	17.9533	38.3324	2.24798	2.68703	10.58	17.9206	62.3536	53.2299	408.595	13.2081	326.623	13.7737
ENSSSCG00000028604	PRCD	photoreceptor disc component	4.05568	-1.814	0.489016	-3.70949	0.000207674	0.00146079	1.84306	7.48203	1.00393	2.00573	2.10371	10.1884	12.8687	1.05762	0	8.11095	1.63158	2.27567	1.24441	0	6.96394	2.69496	0	11.2574	2.19952	0	4.89281	6.86731	1.181	9.78242	8.62277	7.1813	10.3817	1.12399	1.34351	4.40835	5.70201	6.92818	5.32299	0	1.39033	0	0
ENSSSCG00000014110	DMGDH	dimethylglycine dehydrogenase	291.504	-1.81386	0.488051	-3.71654	0.000201966	0.00142584	30.4104	163.536	194.763	504.441	2.10371	241.387	229.798	673.702	216.459	800.667	181.105	352.729	89.5975	27.6301	604.122	18.8647	26.3357	99.7085	558.679	79.6053	294.547	830.945	72.6312	184.643	1020.72	151.705	72.6719	42.7116	180.031	37.9118	7.33115	545.786	213.984	1048.47	122.349	769.437	94.1206
ENSSSCG00000009488	SLITRK5	SLIT and NTRK like family member 5	2.04786	-1.80868	0.685691	-2.63775	0.00834586	0.0296531	3.68611	1.06886	1.00393	1.00287	0.701237	5.48608	4.59595	5.28808	1.57425	3.47612	0	1.13784	1.24441	0	0	0	0	2.4123	5.4988	1.94159	6.84993	2.94313	1.181	1.2228	7.54492	7.1813	1.59719	0	0	0	0.814573	1.53959	0	1.92734	2.08549	0	0.765208
ENSSSCG00000027975		leucine rich repeat containing 3	5.10203	-1.80866	0.569996	-3.17311	0.00150814	0.0075074	2.76458	12.8263	2.00787	3.0086	2.80495	3.91863	2.75757	1.05762	2.36137	0	0.81579	1.13784	1.24441	0	1.74099	2.69496	0	7.23691	0	2.91239	28.3783	2.94313	4.72398	36.6841	3.23354	15.2603	4.79156	12.3639	0	2.64501	5.70201	9.23757	5.32299	0	2.08549	2.582	1.53042
ENSSSCG00000016196	VIL1	villin 1	824.727	-1.80237	0.21978	-8.20078	2.38829e-16	6.68453e-14	190.756	672.314	225.885	481.375	471.933	1101.13	1900.89	1215.2	1429.42	1303.55	968.343	455.135	349.679	180.747	759.07	110.493	367.314	752.639	1126.16	895.074	814.163	1187.06	347.213	1123.76	1444.31	993.713	774.635	197.822	208.245	337.68	267.18	1018.44	1111.44	2551.79	829.331	1516.93	834.076
ENSSSCG00000009929	TRPV4	transient receptor potential cation channel subfamily V member 4	30.2419	-1.80118	0.209954	-8.57893	9.57621e-18	3.77673e-15	6.4507	33.1347	12.0472	46.1318	16.8297	45.4561	44.1211	26.4404	8.65836	34.7612	11.4211	3.41351	3.73323	16.1175	26.1148	15.2714	30.494	67.5445	30.7933	17.4743	44.0353	37.2797	14.7624	66.0314	44.1917	73.6084	55.9015	16.8598	17.4657	18.5151	20.3643	52.3462	62.8113	40.4741	13.9033	30.984	13.0085
ENSSSCG00000013503	SHD	Src homology 2 domain containing transforming protein D	24.5536	-1.79861	0.345291	-5.20898	1.89884e-07	4.05297e-06	5.52917	50.2365	18.0708	29.0831	9.81732	36.8351	28.4949	11.6338	3.14849	30.1264	18.7632	14.7919	6.22205	23.025	19.1508	7.18655	8.31653	12.8656	46.19	12.6204	54.7994	43.166	3.54299	117.389	18.3234	18.8509	27.1522	21.3558	12.0916	5.29002	6.51658	44.6482	29.8087	44.3287	6.95165	56.804	5.35645
ENSSSCG00000012528	BEX3	brain expressed X-linked 3	346.768	-1.79725	0.277165	-6.48442	8.90729e-11	5.20431e-09	105.054	291.799	108.425	381.089	178.815	355.811	509.231	778.406	619.466	644.241	141.947	116.059	41.0655	185.352	116.646	141.036	41.5827	204.242	549.88	126.204	494.173	969.272	123.414	1033.27	893.535	421.004	412.074	131.507	114.199	134.896	159.656	383.359	351.317	531.945	225.929	509.945	304.553
ENSSSCG00000035912	ABCG5	ATP binding cassette subfamily G member 5	410.587	-1.79712	0.390784	-4.59876	4.25013e-06	5.60429e-05	134.543	470.299	347.361	507.45	199.853	547.04	827.271	516.117	769.807	988.377	222.711	311.767	255.104	69.0751	262.889	30.5429	40.1966	167.253	1084.36	36.8903	615.515	1549.07	79.7172	546.593	1582.28	279.173	169.302	21.3558	81.9543	155.174	17.106	382.589	447.131	715.042	114.702	506.072	140.033
ENSSSCG00000011890	NR1I2	nuclear receptor subfamily 1 group I member 2	605.666	-1.7936	0.228565	-7.84723	4.25329e-15	8.02253e-13	93.9959	384.79	488.916	896.561	245.433	883.258	822.675	969.834	648.59	1691.71	319.79	157.022	261.326	263.637	480.512	108.697	127.52	357.825	1037.07	270.852	885.598	1277.32	113.376	742.241	1369.94	853.677	468.774	136.003	251.237	234.524	196.312	900.663	647.275	1532.23	322.556	1602.13	365.769
ENSSSCG00000043565		-	4.96075	-1.79191	0.643068	-2.78649	0.00532817	0.0205969	0	0	1.00393	0	0.701237	2.35118	5.51514	26.4404	3.93562	11.5871	3.26316	2.27567	4.97764	0	0	0	1.38609	11.2574	4.39904	0	5.87137	25.5072	0	8.55962	16.1677	4.48831	5.59015	0	0	1.76334	1.62915	5.38858	1.0646	5.78201	0.695165	21.947	0
ENSSSCG00000010455	SLC16A12	solute carrier family 16 member 12	1211.44	-1.79133	0.247582	-7.23529	4.64522e-13	5.48058e-11	271.851	772.787	274.074	804.298	809.228	1703.03	1744.62	1532.49	1682.87	1385.81	913.685	856.791	401.944	626.281	1253.51	211.105	170.489	2317.42	2955.06	660.141	2114.67	2302.51	438.149	2102	1761.2	1704.66	1340.84	837.371	549.497	674.478	384.478	1418.74	1903.5	2324.37	1113.65	1372.33	1133.27
ENSSSCG00000035243	RAB27B	RAB27B, member RAS oncogene family	198.612	-1.79006	0.3536	-5.0624	4.14013e-07	7.86606e-06	42.3903	165.674	102.401	238.682	198.45	396.565	348.373	240.079	88.1578	46.3483	48.1316	20.4811	19.9106	96.7052	104.459	212.003	42.9688	661.775	290.337	52.423	606.708	639.641	75.5837	622.407	321.198	411.13	305.062	69.6873	60.4581	33.5035	123	147.031	210.79	165.751	38.2341	51.64	50.5037
ENSSSCG00000022429	KAZALD1	Kazal type serine peptidase inhibitor domain 1	42.2899	-1.78644	0.214973	-8.31007	9.56468e-17	2.91186e-14	31.332	42.7545	10.0393	50.1433	23.1408	77.5888	85.4847	56.0537	55.0986	62.5702	22.0263	13.654	13.6885	13.815	43.5246	12.5765	20.7913	45.8338	35.1923	65.0434	43.0567	54.9385	24.2104	85.5962	57.1259	68.2224	62.2902	8.99191	13.4351	21.1601	21.9935	60.0442	69.1988	79.0208	24.3308	59.386	31.3735
ENSSSCG00000008134	EDAR	ectodysplasin A receptor	5.13944	-1.77286	0.536248	-3.30605	0.000946208	0.00515042	0.921528	2.13772	1.00393	9.02579	1.40247	2.35118	11.0303	5.28808	7.87123	18.5393	8.1579	0	8.71087	2.3025	6.96394	0.898319	0	1.6082	7.69833	3.88319	2.93568	14.7157	1.181	2.44561	9.70062	2.69299	5.59015	0	0	1.76334	0.814573	6.92818	4.25839	3.85467	4.17099	19.365	9.9477
ENSSSCG00000036359	SLC43A1	solute carrier family 43 member 1	37.1607	-1.7718	0.332798	-5.32396	1.01533e-07	2.37133e-06	5.52917	14.9641	13.0511	46.1318	21.7384	22.728	37.6868	31.7285	5.50986	70.6812	2.44737	26.1703	8.71087	9.21002	22.6328	12.5765	20.7913	37.7928	100.078	6.79557	95.899	91.2371	4.72398	123.503	54.9702	14.3626	27.9507	4.49595	10.7481	14.1067	13.8477	49.267	31.9379	136.841	4.17099	176.867	3.06083
ENSSSCG00000004170		-	282.383	-1.7693	0.311751	-5.67535	1.38407e-08	4.35893e-07	97.682	391.203	109.429	887.536	183.724	398.916	740.867	289.787	122.791	136.727	74.2369	160.435	31.1102	143.907	90.5312	107.798	483.745	510.604	430.006	53.3938	774.042	453.242	60.8213	1193.46	341.677	271.094	343.395	120.267	81.9543	78.4687	96.1196	157.039	508.878	244.772	50.747	187.195	40.556
ENSSSCG00000039095		solute carrier family 30 member 10	1378.28	-1.76887	0.321614	-5.49997	3.79856e-08	1.03317e-06	76.4868	179.569	265.038	738.109	634.62	1014.14	1453.24	3848.67	2095.32	5489.96	1030.34	179.778	146.84	667.726	527.519	377.294	199.597	665.796	2378.78	1260.09	851.348	3332.61	277.534	1449.02	2998.57	832.134	614.916	137.127	218.993	410.858	262.292	1538.06	793.125	4502.26	1388.94	6753.23	1406.45
ENSSSCG00000004281	KCNQ5	potassium voltage-gated channel subfamily Q member 5	27.6151	-1.76572	0.328714	-5.37161	7.80382e-08	1.91001e-06	11.0583	22.4461	6.0236	24.0688	1.40247	21.9443	13.7879	63.457	14.9553	44.0309	31.8158	9.1027	16.1773	2.3025	10.4459	4.4916	8.31653	32.164	81.3823	22.3283	49.9066	113.801	29.5249	25.6789	64.6708	26.0322	19.1662	20.2318	12.0916	7.93503	3.25829	43.1086	9.58138	73.2388	14.5985	54.222	13.0085
ENSSSCG00000028996	ALDH1A1	aldehyde dehydrogenase 1 family member A1	6820.93	-1.76455	0.309591	-5.69962	1.20074e-08	3.85859e-07	997.094	1407.69	5454.37	6757.31	4123.27	6172.62	10159.8	14980.1	6363.89	11770.1	4323.69	2466.83	1427.34	1246.81	11286.8	909.099	957.787	4784.4	12888.1	3970.56	8204.26	18148.3	2410.41	6748.65	27846.2	7991.89	3195.17	518.159	3010.81	3156.38	1836.05	9960.41	3851.71	24816.4	2861.3	12453	2917.74
ENSSSCG00000000866	MYBPC1	myosin binding protein C, slow type	23.8566	-1.76441	0.403304	-4.37489	1.21494e-05	0.000133183	3.68611	8.55089	3.0118	4.01146	10.5186	14.8908	28.4949	47.5927	40.9304	39.3961	44.8685	4.55135	1.24441	10.3613	5.22296	1.79664	1.38609	7.23691	60.4868	30.0947	13.6999	44.147	14.1719	18.342	50.6588	12.5673	3.19437	6.74393	6.71757	4.40835	5.70201	21.5543	7.45218	136.841	38.2341	71.0051	58.921
ENSSSCG00000008062	PRSS27	serine protease 27	23.0433	-1.76403	0.419249	-4.20759	2.58113e-05	0.000252482	2.76458	26.7215	24.0944	58.1662	21.0371	19.5931	40.4444	5.28808	4.72274	11.5871	11.4211	10.2405	19.9106	18.42	165.394	10.7798	20.7913	9.64921	20.8955	11.6496	24.464	30.4124	4.13348	15.8964	6.46708	32.3159	8.78452	4.49595	5.37406	6.17169	13.0332	42.3389	114.977	13.4914	4.86615	6.45501	5.35645
ENSSSCG00000021018	GSDMB	gasdermin B	11.429	-1.76353	0.390394	-4.5173	6.26329e-06	7.70829e-05	3.68611	14.9641	12.0472	23.0659	6.31114	14.8908	16.5454	14.8066	20.4652	32.4438	5.71053	2.27567	2.48882	9.21002	8.70493	0.898319	1.38609	7.23691	9.89785	0	15.657	32.3745	2.95249	20.7876	35.5689	6.28364	10.3817	3.37196	2.68703	0.88167	0.814573	9.23757	11.7106	38.5467	1.39033	19.365	3.82604
ENSSSCG00000035958	EVA1A	eva-1 homolog A, regulator of programmed cell death	1319.53	-1.76131	0.221952	-7.93556	2.09551e-15	4.4893e-13	654.285	2170.86	557.183	1141.26	451.597	1805.7	1896.29	2058.12	605.298	1599.02	564.527	375.486	373.323	1108.66	1173.42	646.79	568.296	1095.99	3570.92	377.64	2821.19	1643.25	299.382	2468.84	1900.24	2092.45	1086.88	1253.25	463.512	745.893	313.61	3148.47	2514.58	2370.62	271.809	2309.6	324.448
ENSSSCG00000012202		glycerol kinase	1731.35	-1.76108	0.314996	-5.5908	2.26023e-08	6.60194e-07	495.782	6097.86	764.997	1787.11	2579.85	4579.31	4771.52	1381.25	188.91	650.035	218.632	1383.61	1488.31	236.007	1328.37	377.294	596.018	2464.57	3994.33	90.2841	4116.81	4696.26	132.271	5108.87	1372.1	1503.59	3054.62	934.034	591.146	566.914	555.539	1227.06	2989.39	1083.16	75.7729	512.527	65.8079
ENSSSCG00000036746	RASL10B	RAS like family 10 member B	285.89	-1.75966	0.387784	-4.53774	5.68604e-06	7.1139e-05	90.3098	909.601	59.2321	323.925	173.907	572.903	437.535	82.4941	46.4403	83.4269	54.6579	158.159	113.241	61.0164	144.502	61.984	76.2349	635.24	47.2897	10.6788	944.312	236.432	41.9253	924.439	164.91	447.036	708.352	965.506	141.069	358.84	229.709	364.114	646.211	119.495	20.1598	101.989	20.6606
ENSSSCG00000050868		-	3.04345	-1.75826	0.717027	-2.45215	0.0142005	0.0452981	0.921528	2.13772	0	1.00287	0.701237	2.35118	0.91919	2.11523	17.3167	6.95224	1.63158	0	0	2.3025	3.48197	0	0	0	4.39904	4.85398	0.978561	3.92418	6.49547	1.2228	8.62277	2.69299	2.39578	3.37196	0	1.76334	1.62915	9.23757	6.38759	0	2.08549	0	10.7129
ENSSSCG00000005918	DGAT1	diacylglycerol O-acyltransferase 1	138.829	-1.7575	0.263651	-6.666	2.62861e-11	1.83929e-09	48.841	107.955	55.2163	170.487	63.8126	164.582	241.747	214.696	59.0343	280.407	45.6843	46.6513	36.0879	47.2013	40.0427	52.1025	38.8105	83.6265	96.779	18.4451	376.746	505.238	25.3914	348.499	399.881	185.816	185.274	111.275	56.4276	32.6218	33.3975	164.737	122.429	329.575	38.9292	281.438	26.7823
ENSSSCG00000023627		LY6/PLAUR domain containing 6	7.44395	-1.75686	0.548055	-3.20563	0.00134769	0.0068562	3.68611	2.13772	0	7.02006	1.40247	3.1349	7.35352	6.3457	11.8069	6.95224	8.97369	3.41351	1.24441	5.75626	1.74099	0	0	2.4123	10.9976	24.2699	10.7642	5.88627	5.31448	18.342	8.62277	11.6696	0	5.61994	5.37406	1.76334	0	3.84899	13.8398	21.2007	17.3791	34.857	2.29562
ENSSSCG00000013491	TJP3	tight junction protein 3	68.9688	-1.75576	0.343314	-5.11414	3.15168e-07	6.21489e-06	14.7445	18.1706	19.0747	73.2092	91.1608	149.692	158.101	114.223	52.7373	99.6488	26.9211	6.82702	11.1997	20.7225	26.1148	40.4244	15.247	57.8953	56.0878	79.6053	114.492	77.5025	25.3914	226.219	117.485	125.673	89.4424	30.3477	22.8397	27.3318	53.7618	107.002	57.4883	188.879	32.6727	89.0791	34.4343
ENSSSCG00000011477	ACOX2	acyl-CoA oxidase 2	1404.95	-1.75285	0.283131	-6.19096	5.98006e-10	2.8353e-08	254.342	716.137	871.414	1242.55	1265.03	1139.54	1274	3168.62	1672.64	4602.39	1545.92	161.573	141.863	336.166	504.886	284.767	268.901	1284.15	3032.04	818.381	1855.35	2865.63	325.955	2009.07	3519.17	943.444	850.501	331.577	335.878	554.571	575.088	1280.94	987.946	3334.29	1443.86	4847.71	1336.82
ENSSSCG00000044691		-	5.19816	-1.75177	0.573265	-3.05578	0.00224474	0.0102751	0.921528	3.20658	1.00393	0	1.40247	3.91863	4.59595	2.11523	2.36137	15.0632	1.63158	2.27567	1.24441	0	0	0	0	6.43281	21.9952	0	7.82849	14.7157	1.77149	6.11401	4.31139	7.1813	3.19437	2.24798	10.7481	5.29002	2.44372	8.46777	2.1292	30.8374	1.39033	15.492	0
ENSSSCG00000012845	CEND1	cell cycle exit and neuronal differentiation 1	41.74	-1.74957	0.481477	-3.63376	0.000279324	0.00186069	6.4507	4.27545	11.0433	73.2092	11.2198	32.9165	16.5454	59.2265	2.36137	92.6966	3.26316	2.27567	22.3994	18.42	29.5967	26.0513	12.4748	7.23691	32.9928	69.8973	25.4426	54.9385	4.13348	31.7929	53.8923	63.7341	39.9296	3.37196	4.03054	5.29002	8.14573	78.5193	20.2274	476.052	4.86615	127.809	7.65208
ENSSSCG00000033394	VWA3B	von Willebrand factor A domain containing 3B	37.7961	-1.74189	0.315262	-5.52523	3.29057e-08	9.09255e-07	7.37223	16.0329	12.0472	32.0917	7.71361	35.2676	29.4141	54.9961	10.2326	187.711	7.34211	7.96486	37.3323	12.6638	17.4099	1.79664	4.15827	34.5764	52.7885	18.4451	64.585	44.147	6.49547	24.4561	77.6049	52.0645	27.9507	6.74393	10.7481	14.9884	14.6623	48.4972	40.4547	233.208	15.2936	116.19	13.0085
ENSSSCG00000013380		nucleobindin 2	920.676	-1.74051	0.263273	-6.61106	3.81575e-11	2.50813e-09	458.921	1667.42	457.794	1490.26	549.069	1589.39	2616.94	402.952	176.316	229.424	70.158	282.184	462.92	338.468	1171.68	1488.51	616.81	501.759	1231.73	87.3717	4021.89	776.987	142.9	2507.97	272.695	2366.24	1400.73	336.072	693.253	507.842	487.929	1852.13	1884.34	427.869	150.156	193.65	152.276
ENSSSCG00000002712	LDHD	lactate dehydrogenase D	838.328	-1.73031	0.325195	-5.32085	1.03285e-07	2.40902e-06	95.8389	556.877	202.795	1178.37	224.396	1177.94	1433.94	1658.34	493.526	1162.18	216.184	595.089	587.361	295.872	1149.05	89.8319	108.115	920.696	1156.95	89.3133	1608.75	2054.31	69.0882	2254.85	1591.98	1179.53	951.124	1225.15	718.78	621.578	278.584	1556.53	959.202	1067.74	194.646	1128.33	165.285
ENSSSCG00000010609	CFAP43	cilia and flagella associated protein 43	5.62202	-1.72904	0.460018	-3.75864	0.000170837	0.00124091	1.84306	2.13772	7.02753	6.01719	1.40247	7.83725	6.43433	8.46093	3.14849	16.2219	0.81579	1.13784	0	1.15125	1.74099	1.79664	1.38609	0.804101	12.0974	0.970796	3.91424	9.81044	1.181	7.33682	11.8563	6.28364	3.99296	1.12399	2.68703	3.52668	0	9.23757	7.45218	17.346	1.39033	36.148	2.29562
ENSSSCG00000021767		L-threonine 3-dehydrogenase	2704.03	-1.72715	0.260621	-6.62703	3.425e-11	2.27716e-09	927.979	2646.5	796.119	3619.34	530.135	3810.47	2813.64	5549.31	1031.92	6391.43	360.579	1571.35	842.465	1807.47	2083.96	1466.96	334.047	2524.07	3921.75	387.348	4222.49	5633.16	191.321	6656.94	6511.27	3666.95	2850.98	3271.93	1068.09	868.445	1211.27	4157.68	6655.86	5016.86	647.198	3232.67	769.034
ENSSSCG00000002475	SERPINA6	serpin family A member 6	1329.51	-1.72685	0.349666	-4.93856	7.8701e-07	1.34023e-05	78.3299	282.179	150.59	751.146	426.352	434.184	871.392	3165.45	1164.94	2886.34	360.579	826.07	220.26	323.502	797.371	226.376	97.0262	720.475	1451.68	563.062	824.927	3111.87	102.747	3406.73	2851.98	868.04	964.7	550.754	832.979	549.281	149.067	1783.62	960.267	10382.6	1428.56	3441.81	1184.54
ENSSSCG00000027404	UNC93A	unc-93 homolog A	147.768	-1.72684	0.313011	-5.51686	3.45106e-08	9.49068e-07	47.9195	42.7545	61.2399	111.318	16.1285	94.8307	178.323	300.363	109.41	353.406	44.0527	27.3081	19.9106	32.2351	50.4886	61.0857	67.9184	70.7609	324.429	28.1531	150.698	349.252	21.8484	264.125	268.384	84.3803	80.6579	37.0916	33.5878	59.9536	50.5035	164.737	156.496	1017.63	43.1002	622.263	20.6606
ENSSSCG00000001847	MESP1	mesoderm posterior bHLH transcription factor 1	37.8586	-1.72544	0.30746	-5.61193	2.00086e-08	5.93521e-07	29.4889	34.2036	28.1101	54.1547	32.9581	57.2119	67.1009	51.8232	33.0592	27.809	25.2895	2.27567	2.48882	18.42	19.1508	19.763	16.6331	18.4943	86.8811	62.131	79.2635	39.2418	17.7149	95.3786	28.024	42.1902	30.3465	16.8598	5.37406	15.8701	21.9935	78.5193	63.8759	69.3841	34.0631	40.021	35.1996
ENSSSCG00000031919		UDP-glucuronosyltransferase 2C1	34.3746	-1.71949	0.683206	-2.5168	0.0118427	0.0392187	11.9799	25.6527	15.059	3.0086	53.9953	38.4025	39.5252	50.7656	46.4403	111.236	50.579	0	7.46646	2.3025	1.74099	3.59328	0	0.804101	92.3799	10.6788	43.0567	237.413	24.8009	8.55962	196.168	8.97663	0.798593	1.12399	0	10.58	0	6.92818	24.4857	104.076	9.7323	18.074	11.4781
ENSSSCG00000049017		-	10.1018	-1.71669	0.396658	-4.32789	1.50547e-05	0.000160215	2.76458	4.27545	3.0118	11.0315	9.11608	14.8908	13.7879	26.4404	16.5296	6.95224	4.89474	1.13784	1.24441	8.05877	1.74099	7.18655	1.38609	7.23691	6.59857	5.82478	15.657	26.4882	9.44796	24.4561	22.6348	14.3626	15.9719	3.37196	0	2.64501	4.07286	23.0939	10.646	28.91	5.56132	7.74601	4.59125
ENSSSCG00000039382		-	2.03573	-1.71448	0.547132	-3.13358	0.00172688	0.00834027	0	3.20658	3.0118	2.00573	2.10371	4.70235	8.27271	1.05762	0.787123	0	0	0	0	0	6.96394	2.69496	1.38609	3.2164	3.29928	0	2.93568	0.981044	0	6.11401	0	5.38598	1.59719	1.12399	1.34351	1.76334	1.62915	4.61878	3.19379	1.92734	0	0	0
ENSSSCG00000003891	CYP4A24	cytochrome P450 4A24	382.469	-1.71362	0.3672	-4.66674	3.06019e-06	4.23811e-05	166.797	67.3383	87.3422	337.966	102.381	366.783	262.888	228.445	598.214	346.454	177.026	164.986	116.974	37.9913	229.81	20.6613	34.6522	452.709	593.871	68.9265	667.379	1564.77	76.1742	386.406	1366.71	447.934	259.543	115.771	233.771	286.543	410.545	435.705	665.373	1449.36	405.976	500.908	416.273
ENSSSCG00000007738		argininosuccinate lyase	2895.58	-1.71342	0.308617	-5.55193	2.82537e-08	7.99814e-07	269.086	913.877	1554.09	3726.65	849.198	1335.47	3478.22	6428.19	618.679	5823.66	606.948	966.024	691.892	1216.87	2672.41	909.099	1606.48	1048.55	8823.38	975.65	4421.14	7468.69	332.45	3244.1	7105.16	1538.59	1308.89	586.722	489.039	425.847	456.975	2236.26	1892.85	21277.8	543.619	8795.59	498.15
ENSSSCG00000001901	CYP1A2	cytochrome P450, family 1, subfamily A, polypeptide 2	12.695	-1.70806	0.423347	-4.03467	5.46802e-05	0.000474196	7.37223	6.41317	6.0236	37.106	4.20742	14.1071	5.51514	11.6338	7.87123	30.1264	6.52632	6.82702	2.48882	6.90751	6.96394	2.69496	0	4.82461	31.8931	1.94159	15.657	26.4882	5.90498	18.342	36.6468	9.87429	3.19437	0	2.68703	7.93503	2.44372	9.23757	15.969	61.6748	1.39033	47.767	3.06083
ENSSSCG00000040296	EHHADH	enoyl-CoA hydratase and 3-hydroxyacyl CoA dehydrogenase	2104.11	-1.70747	0.234702	-7.27504	3.46318e-13	4.17338e-11	469.058	1462.2	442.735	2638.54	538.55	1802.57	1805.29	2874.6	772.955	3126.19	368.737	844.275	1184.68	637.794	4667.58	595.586	776.21	3854.06	3831.57	419.384	3971	5009.21	228.523	3405.51	6523.13	2213.64	1535.69	1646.64	1968.25	1326.91	438.24	2474.9	2196.26	6579.93	378.17	4508.18	335.161
ENSSSCG00000039378	SERPINA4	kallistatin	68.3773	-1.7051	0.269857	-6.31854	2.64043e-10	1.37184e-08	13.8229	22.4461	23.0905	18.0516	20.3359	43.8886	73.5352	116.338	34.6334	214.361	34.2632	21.6189	22.3994	16.1175	29.5967	19.763	18.0192	32.164	112.176	22.3283	100.792	143.232	17.1244	128.394	185.39	50.2691	41.5268	19.1078	14.7787	29.9768	13.8477	94.6851	64.9404	424.014	23.6356	247.872	21.4258
ENSSSCG00000014055	CDHR2	cadherin related family member 2	39.2211	-1.70282	0.378191	-4.50253	6.71496e-06	8.13721e-05	2.76458	11.7575	13.0511	69.1977	40.6718	28.2141	119.495	39.1318	18.891	42.8722	15.5	7.96486	7.46646	14.9663	13.9279	15.2714	29.1079	27.3394	70.3847	52.423	87.0919	92.2182	33.6584	105.161	68.9822	31.4182	31.1451	6.74393	8.06108	12.3434	13.8477	11.547	33.0025	152.26	29.1969	61.9681	32.1387
ENSSSCG00000017861	ASPA	aspartoacylase	8.44545	-1.70237	0.51032	-3.33588	0.000850293	0.00472164	0	13.8952	3.0118	7.02006	2.10371	10.1884	10.1111	13.749	3.14849	11.5871	4.07895	2.27567	4.97764	8.05877	59.1935	0	1.38609	5.62871	6.59857	1.94159	1.95712	15.6967	1.181	2.44561	6.46708	8.97663	3.99296	11.2399	17.4657	6.17169	2.44372	24.6335	18.0982	5.78201	0	11.619	5.35645
ENSSSCG00000011404	HYAL1	N(alpha)-acetyltransferase 80, NatH catalytic subunit	120.405	-1.70186	0.317993	-5.35187	8.70493e-08	2.07781e-06	35.9396	44.8922	80.3147	119.341	107.289	177.906	237.151	226.33	85.0093	187.711	75.8685	23.8946	11.1997	41.4451	26.1148	43.1193	30.494	81.2142	105.577	122.32	129.17	293.332	53.1448	338.716	291.019	220.825	167.704	25.8517	14.7787	29.0951	70.0533	132.405	52.1653	352.703	47.9664	295.639	77.286
ENSSSCG00000003789	CTH	cystathionine gamma-lyase	5168.59	-1.69993	0.253915	-6.69488	2.15855e-11	1.54782e-09	623.875	2500.07	2542.96	11173.9	1563.06	5144.37	7450.96	7228.81	794.207	12226.7	631.422	2416.77	1780.75	3017.43	6096.93	3056.98	3322.46	3968.24	13342.3	1292.13	5807.76	11393.8	441.102	10134.6	9016.18	4708.24	4839.47	1152.09	2590.29	1466.22	909.878	4532.57	5314.47	21904.2	1005.9	14818.1	1028.44
ENSSSCG00000041722		-	6.72122	-1.69907	0.433261	-3.92159	8.79683e-05	0.000706719	0.921528	5.34431	2.00787	9.02579	5.6099	12.5396	6.43433	9.51855	7.87123	15.0632	3.26316	4.55135	0	3.45376	26.1148	3.59328	2.77218	8.84511	1.09976	0.970796	3.91424	8.8294	4.72398	20.7876	11.8563	13.4649	11.1803	4.49595	4.03054	2.64501	3.25829	16.1657	6.38759	0	2.78066	5.164	0
ENSSSCG00000002887	MAG	myelin associated glycoprotein	18.0058	-1.69672	0.394166	-4.30457	1.67313e-05	0.000175643	1.84306	11.7575	9.0354	44.1261	4.90866	21.1606	28.4949	2.11523	1.57425	24.3329	4.89474	6.82702	7.46646	24.1763	0	14.3731	23.5635	15.2779	24.1947	7.76637	21.5283	43.166	8.26697	77.0366	26.9462	31.4182	50.3113	7.86792	6.71757	7.05336	1.62915	35.4107	21.292	11.564	2.78066	32.275	3.06083
ENSSSCG00000027415	WWOX	WW domain containing oxidoreductase	16.8111	-1.69453	0.387153	-4.37691	1.20373e-05	0.000132288	5.52917	30.997	7.02753	22.063	23.1408	33.7002	30.3333	21.1523	7.08411	12.7458	4.07895	2.27567	3.73323	8.05877	10.4459	5.38992	1.38609	26.5353	4.39904	1.94159	48.9281	19.6209	5.90498	62.3629	17.2455	47.5761	29.5479	22.4798	8.06108	14.9884	16.2915	30.0221	25.5503	0	3.47582	2.582	5.35645
ENSSSCG00000023415		amine sulfotransferase-like	1458.13	-1.69064	0.325563	-5.19297	2.06962e-07	4.35851e-06	1791.45	850.814	538.108	1548.42	716.664	2208.54	3188.67	3379.08	1039.79	3349.82	2433.5	811.278	217.772	320.048	593.676	304.53	683.342	1427.28	4984.12	292.21	2149.9	2374.13	744.027	1493.04	1968.15	1501.79	1058.14	324.833	239.145	943.387	295.69	2106.94	1227.48	2850.53	228.014	3560.58	205.841
ENSSSCG00000031465	PRRT1B	proline rich transmembrane protein 1B	130.686	-1.68921	0.217184	-7.77779	7.38023e-15	1.33405e-12	25.8028	333.485	118.464	247.708	68.02	287.627	109.384	85.6669	36.9948	46.3483	50.579	69.4081	33.5991	113.974	198.472	59.2891	52.6714	257.312	139.67	39.8026	189.841	103.01	24.8009	174.861	93.7726	328.545	240.376	71.9352	81.9543	152.529	108.338	310.998	306.604	121.422	47.9664	49.058	55.095
ENSSSCG00000025621	CXXC4	CXXC finger protein 4	5.02048	-1.68756	0.566295	-2.98	0.00288247	0.0125111	0	1.06886	3.0118	5.01433	7.71361	3.91863	2.75757	11.6338	18.891	2.31741	15.5	1.13784	0	0	1.74099	0	0	13.6697	2.19952	3.88319	13.6999	3.92418	2.36199	4.89121	6.46708	3.59065	4.79156	1.12399	4.03054	2.64501	1.62915	3.84899	3.19379	1.92734	13.9033	11.619	7.65208
ENSSSCG00000047902		-	14.8083	-1.6862	0.465116	-3.62533	0.000288589	0.00191433	16.5875	67.3383	14.0551	23.0659	10.5186	25.0792	17.4646	4.23047	2.36137	2.31741	6.52632	3.41351	2.48882	8.05877	13.9279	6.28823	1.38609	71.565	2.19952	0	3.91424	3.92418	3.54299	6.11401	8.62277	47.5761	47.117	11.2399	17.4657	20.2784	13.8477	35.4107	11.7106	0	1.39033	3.873	13.0085
ENSSSCG00000021950	TPPP2	tubulin polymerization promoting protein family member 2	3.65891	-1.68502	0.637345	-2.64382	0.00819773	0.0292586	0.921528	0	1.00393	9.02579	0	3.91863	1.83838	6.3457	1.57425	8.11095	0	0	1.24441	3.45376	5.22296	0.898319	0	2.4123	12.0974	0	1.95712	3.92418	0	6.11401	10.7785	4.48831	0.798593	2.24798	6.71757	7.93503	0	5.38858	12.7752	13.4914	0.695165	0	0
ENSSSCG00000039850	SLC6A11	solute carrier family 6 member 11	869.156	-1.6803	0.26324	-6.38315	1.73486e-10	9.61821e-09	257.106	683.003	364.428	758.166	854.107	1278.26	1253.78	1150.69	570.664	2326.68	383.421	256.013	205.328	221.04	327.305	196.732	98.4123	1073.48	664.256	118.437	1163.51	2831.29	144.081	1095.63	4530.19	980.248	611.722	319.213	170.626	484.037	316.869	1347.92	1032.66	1696.06	213.416	1951.99	228.032
ENSSSCG00000023661	GABRA1	gamma-aminobutyric acid type A receptor alpha1 subunit	11.0649	-1.67956	0.604578	-2.77806	0.00546837	0.0210498	1.84306	4.27545	1.00393	2.00573	3.50619	10.1884	13.7879	54.9961	24.4008	50.9831	10.6053	0	1.24441	0	0	3.59328	0	0.804101	25.2945	22.3283	0.978561	7.84835	25.9819	2.44561	32.3354	1.79533	0	0	0	6.17169	1.62915	4.61878	4.25839	17.346	14.5985	30.984	27.5475
ENSSSCG00000041248		zinc finger BED-type containing 3	57.8233	-1.67277	0.311565	-5.36893	7.92045e-08	1.93039e-06	9.21528	28.8593	20.0787	29.0831	16.1285	65.0492	69.8585	205.178	20.4652	84.5856	49.7632	15.9297	14.9329	16.1175	6.96394	10.7798	5.54436	41.8133	62.6864	37.8611	64.585	233.489	23.0294	34.2385	243.593	36.8042	59.0959	5.61994	2.68703	17.6334	8.14573	26.1731	14.9044	370.049	12.513	169.121	6.88687
ENSSSCG00000009789	HCAR1	hydroxycarboxylic acid receptor 1	7.21328	-1.67129	0.575397	-2.90458	0.00367749	0.0152341	2.76458	1.06886	0	5.01433	3.50619	4.70235	2.75757	8.46093	10.2326	19.698	3.26316	0	0	2.3025	1.74099	0	0	2.4123	7.69833	4.85398	3.91424	20.6019	4.72398	13.4508	10.7785	1.79533	2.39578	5.61994	0	0	2.44372	5.38858	0	57.8201	11.8178	42.603	3.06083
ENSSSCG00000015926	ABCB11	ATP binding cassette subfamily B member 11	1594.72	-1.6674	0.387633	-4.3015	1.69644e-05	0.000177447	416.531	712.931	948.717	1146.27	969.11	1576.07	1468.87	2473.76	4175.69	5247.79	1704.19	473.34	810.111	226.797	820.004	117.68	54.0575	464.77	3910.75	930.023	1168.4	4216.53	605.851	928.107	6234.26	988.327	308.257	60.6954	130.321	588.956	76.5698	1309.43	976.236	4055.12	1525.89	5671.37	1512.82
ENSSSCG00000015079	BACE1	beta-secretase 1	643.997	-1.66684	0.218173	-7.64002	2.17187e-14	3.48966e-12	334.515	358.069	411.613	820.344	334.49	833.884	987.21	825.998	857.177	1162.18	420.132	116.059	161.773	177.293	215.882	263.208	194.052	483.265	876.509	456.274	972.69	1092.88	227.932	1241.14	1487.43	797.125	646.86	250.649	245.863	283.898	308.723	842.158	956.009	1936.97	358.01	1541.46	348.17
ENSSSCG00000020941	LTB4R2	leukotriene B4 receptor 2	33.7684	-1.66635	0.246509	-6.75978	1.38202e-11	1.04725e-09	11.9799	11.7575	13.0511	41.1175	21.0371	42.3212	65.2625	66.6298	30.6978	74.1573	31	9.1027	13.6885	13.815	12.1869	8.98319	8.31653	32.9681	63.7861	18.4451	62.6279	82.4077	14.1719	51.3577	74.3714	38.5995	33.5409	22.4798	6.71757	12.3434	12.2186	45.418	31.9379	92.5121	19.4646	45.185	13.7737
ENSSSCG00000010259	TYSND1	trypsin domain containing 1	198.511	-1.66278	0.294068	-5.65439	1.56404e-08	4.84656e-07	73.7223	134.677	40.1573	317.908	137.442	342.488	419.151	174.507	164.509	185.393	128.895	98.9918	72.1758	73.6801	45.2656	168.884	176.033	92.4716	707.146	125.233	395.339	260.958	86.2127	660.314	194.012	201.974	126.178	71.9352	67.1757	94.3387	101.822	311.768	291.7	339.211	114.007	233.671	115.546
ENSSSCG00000031865	AQP8	aquaporin 8	24.9467	-1.65688	0.485296	-3.41416	0.000639784	0.0037131	0	1.06886	3.0118	28.0802	10.5186	10.1884	14.707	28.5556	40.1433	44.0309	39.1579	0	1.24441	2.3025	13.9279	26.9496	11.0887	4.82461	32.9928	60.1894	32.2925	48.0712	91.5271	50.1349	37.7246	9.87429	7.18733	4.49595	1.34351	0.88167	14.6623	51.5764	8.51678	52.0381	50.0519	32.275	57.3906
ENSSSCG00000002479	SERPINA11	serpin family A member 11	1705.95	-1.65555	0.257633	-6.42601	1.31e-10	7.35676e-09	335.436	1466.48	830.253	1660.74	542.056	899.717	2564.54	2428.29	739.109	3755.37	432.369	721.389	1149.83	1025.77	2273.73	305.429	591.86	1151.47	3635.81	215.517	2730.19	4079.18	108.652	4338.5	3335.93	2219.02	2596.22	1290.34	1070.78	675.36	439.869	2602.68	2073.84	4261.34	295.445	3973.7	303.787
ENSSSCG00000031154	ACKR2	atypical chemokine receptor 2	205.607	-1.6555	0.499999	-3.311	0.000929641	0.00507617	117.034	288.593	17.0669	352.006	18.9334	343.272	253.697	20.0947	11.0197	30.1264	16.3158	35.2729	343.457	41.4451	572.784	53.0008	109.501	273.394	104.477	1.94159	214.305	155.005	19.4864	213.99	24.7905	313.284	392.908	394.52	454.108	139.304	52.9472	646.63	228.888	1273.97	9.03714	59.386	11.4781
ENSSSCG00000023054	IDO2	indoleamine 2,3-dioxygenase 2	143.432	-1.65222	0.379812	-4.35012	1.36065e-05	0.000146746	85.7021	67.3383	38.1495	141.404	2.10371	118.343	136.959	163.931	24.4008	231.741	17.9474	11.3784	155.551	65.6214	141.02	26.0513	52.6714	208.262	408.011	8.73717	308.247	346.309	13.5814	206.654	442.995	269.299	95.8311	68.5633	91.3589	50.2552	14.6623	218.622	45.7777	630.239	2.78066	387.3	9.18249
ENSSSCG00000014851	SLCO2B1	solute carrier organic anion transporter family member 2B1	1907.42	-1.65198	0.261184	-6.32498	2.53266e-10	1.32777e-08	298.575	1569.09	1288.05	2540.26	1303.6	2703.07	2925.78	2573.18	1364.87	1858.57	800.29	938.715	652.071	856.532	1084.63	880.353	255.04	3118.3	1723.33	487.34	4944.67	4374.48	472.398	5787.53	3640.96	2464.08	2770.32	1587.07	525.314	1111.79	1088.27	2601.91	1995.06	3823.84	592.975	2929.28	642.775
ENSSSCG00000029945	GCAT	glycine C-acetyltransferase	698.189	-1.65164	0.269206	-6.13523	8.50339e-10	3.86185e-08	155.738	794.164	190.747	644.842	268.574	742.188	915.514	1186.65	415.601	1331.35	175.395	381.175	250.126	244.065	579.748	112.29	259.199	581.365	1432.99	256.29	1676.28	1479.41	79.1267	1557.85	1302.04	569.118	757.864	954.266	266.016	513.132	281.842	960.707	823.998	2320.51	111.226	1115.42	146.155
ENSSSCG00000002012	CARMIL3	capping protein regulator and myosin 1 linker 3	11.1329	-1.65132	0.358534	-4.60575	4.10982e-06	5.43581e-05	3.68611	14.9641	5.01967	8.02292	1.40247	11.7559	9.1919	28.5556	10.2326	52.1418	10.6053	1.13784	3.73323	4.60501	1.74099	2.69496	0	3.2164	6.59857	15.5327	4.89281	28.4503	8.26697	14.6736	34.4911	8.97663	7.18733	4.49595	1.34351	0	4.07286	10.0074	9.58138	42.4014	3.47582	27.111	7.65208
ENSSSCG00000041921		-	6.03676	-1.64963	0.468615	-3.52021	0.000431198	0.00266758	1.84306	1.06886	0	2.00573	1.40247	14.1071	13.7879	6.3457	0.787123	5.79354	3.26316	4.55135	1.24441	2.3025	6.96394	2.69496	2.77218	10.4533	8.79809	0	11.7427	15.6967	2.95249	19.5648	12.9342	5.38598	9.58311	13.4879	0	2.64501	4.88744	3.84899	5.32299	9.63668	6.25648	3.873	5.35645
ENSSSCG00000005740	SARDH	sarcosine dehydrogenase	912.857	-1.64946	0.273462	-6.03175	1.62189e-09	6.84784e-08	78.3299	730.033	598.344	1203.44	514.007	982.008	715.13	1134.82	462.829	2274.54	366.29	210.5	123.197	503.097	847.86	249.733	309.098	604.684	1231.73	246.582	987.368	1454.89	55.5068	1676.46	1253.54	763.014	769.045	361.924	227.054	591.601	521.327	1675.08	1080.57	4359.63	228.709	4110.55	273.179
ENSSSCG00000033185	PPP2R3A	protein phosphatase 2 regulatory subunit B''alpha	511.608	-1.64903	0.301344	-5.47226	4.44323e-08	1.18621e-06	187.992	1019.69	141.555	648.854	554.679	1343.3	985.372	209.408	107.049	72.9986	119.921	408.483	243.904	301.628	416.095	319.802	230.091	2043.22	467.398	33.0071	1785.87	764.234	126.366	1017.37	158.443	1122.98	1134.8	478.819	192.122	313.875	259.034	542.707	763.316	90.5848	127.215	95.5341	101.773
ENSSSCG00000003669	MFSD2A	major facilitator superfamily domain containing 2A	97.8306	-1.64621	0.439347	-3.74695	0.000178994	0.00129259	4.60764	115.437	21.0826	435.243	51.1903	139.503	355.727	2.11523	2.36137	4.63483	3.26316	64.8567	36.0879	58.7139	149.725	362.921	169.103	69.9568	93.4797	4.85398	291.611	32.3745	1.181	240.892	9.70062	194.793	64.686	20.2318	69.8627	16.7517	47.2452	187.831	286.377	1.92734	3.47582	5.164	0.765208
ENSSSCG00000011397	SLC38A3	solute carrier family 38 member 3	3586.89	-1.64309	0.282422	-5.81784	5.96114e-09	2.094e-07	255.263	1661.01	3119.22	4203.01	2908.03	3363.75	4387.3	5530.28	2741.55	10170	2692.92	947.818	838.732	1029.22	2317.25	716.859	468.498	1354.91	4481.53	2902.68	3215.55	4747.27	569.83	4383.75	7800.37	2834.82	2399.77	855.355	1159.45	1634.62	1531.4	6089.1	6796.39	17301.7	2093.14	11242	1970.41
ENSSSCG00000029339	SPATA2L	spermatogenesis associated 2 like	51.3278	-1.64159	0.293411	-5.59484	2.20821e-08	6.48376e-07	27.6458	48.0988	14.0551	55.1576	42.0742	78.3725	109.384	41.247	54.3115	66.0463	33.4474	2.27567	11.1997	24.1763	24.3738	36.8311	15.247	37.7928	46.19	64.0726	138.956	78.4835	40.7443	117.389	67.9043	96.0499	65.4846	30.3477	18.8092	22.0418	25.2518	80.0589	29.8087	127.204	34.0631	76.1691	18.365
ENSSSCG00000043914		-	4.57738	-1.6412	0.552152	-2.97236	0.00295515	0.0127516	2.76458	19.2395	2.00787	4.01146	0.701237	10.1884	9.1919	3.17285	2.36137	19.698	4.07895	1.13784	0	3.45376	6.96394	1.79664	0	0	1.09976	1.94159	0	0.981044	2.95249	2.44561	1.07785	5.38598	3.99296	2.24798	5.37406	4.40835	2.44372	16.1657	6.38759	0	2.08549	18.074	1.53042
ENSSSCG00000031978		-	237.491	-1.63742	0.258904	-6.32445	2.54137e-10	1.32833e-08	63.5854	210.566	161.633	660.888	193.541	380.107	541.403	287.672	58.2471	149.473	21.2105	118.335	77.1534	209.528	174.099	203.918	105.343	410.896	184.76	56.3062	185.927	327.669	32.4774	881.641	187.545	518.849	431.24	85.4231	158.535	81.1137	151.511	555.024	279.989	346.921	61.8697	180.74	52.0341
ENSSSCG00000023142	GAMT	guanidinoacetate N-methyltransferase	5160.83	-1.63305	0.272779	-5.98672	2.14111e-09	8.681e-08	726.164	2031.91	1910.49	5321.2	1837.94	3120.79	6662.29	7735.41	2607.74	8151.51	2152.87	2574.93	1844.21	1691.19	6103.89	822.86	2065.27	2631.82	9768.08	1636.76	8884.36	11653.8	602.308	10495.3	9202.65	3400.35	4026.5	3295.53	2661.5	2570.07	976.673	5378.57	4272.23	34011.7	1721.23	14720	1680.4
ENSSSCG00000009827	HVCN1	hydrogen voltage gated channel 1	41.4316	-1.63127	0.280894	-5.80742	6.34435e-09	2.20628e-07	12.9014	28.8593	24.0944	77.2206	20.3359	53.2933	56.9898	27.498	33.0592	28.9677	11.4211	12.5162	19.9106	55.2601	31.3377	39.526	4.15827	47.442	46.19	18.4451	64.585	79.4646	17.7149	66.0314	82.9942	127.468	102.22	10.1159	16.1222	19.3968	13.8477	69.2818	78.7802	50.1107	13.2081	64.5501	7.65208
ENSSSCG00000001625	PGC	progastricsin	17.3908	-1.62616	0.465935	-3.4901	0.000482847	0.0029266	0	4.27545	10.0393	4.01146	1.40247	13.3233	11.0303	77.206	4.72274	27.809	1.63158	4.55135	1.24441	6.90751	3.48197	0	0	1.6082	9.89785	3.88319	7.82849	23.5451	0.590498	13.4508	38.8025	8.97663	12.7775	4.49595	10.7481	0	3.25829	17.7053	13.8398	148.405	2.78066	148.465	0.765208
ENSSSCG00000003710	TTC39C	tetratricopeptide repeat domain 39C	16.8787	-1.62615	0.339544	-4.78924	1.67418e-06	2.59625e-05	11.9799	11.7575	4.01573	29.0831	3.50619	28.9978	21.1414	31.7285	3.93562	52.1418	1.63158	2.27567	2.48882	10.3613	24.3738	9.88151	2.77218	18.4943	7.69833	4.85398	13.6999	48.0712	7.67647	20.7876	71.1379	22.4416	15.9719	14.6118	0	11.4617	4.88744	33.8711	18.0982	9.63668	2.08549	43.894	3.06083
ENSSSCG00000013760		chromosome 2 C19orf57 homolog	11.7313	-1.62061	0.357043	-4.53898	5.65265e-06	7.08234e-05	0.921528	7.48203	2.00787	22.063	11.921	23.5118	21.1414	8.46093	17.3167	12.7458	12.2369	3.41351	2.48882	4.60501	1.74099	8.98319	1.38609	15.2779	15.3967	24.2699	5.87137	19.6209	10.629	31.7929	15.0898	12.5673	11.1803	3.37196	2.68703	4.40835	8.9603	16.1657	7.45218	15.4187	15.9888	23.238	12.2433
ENSSSCG00000013040	TRPT1	tRNA phosphotransferase 1	63.9691	-1.61687	0.274602	-5.88803	3.90831e-09	1.45851e-07	9.21528	12.8263	32.1259	75.2149	34.3606	47.0235	94.6766	46.5351	33.8463	107.76	24.4737	23.8946	21.155	25.3276	40.0427	30.5429	20.7913	46.6379	112.176	36.8903	143.848	169.721	20.0769	193.203	101.318	93.3569	102.22	30.3477	29.5573	22.0418	57.0201	73.1307	58.5529	152.26	55.6132	131.682	57.3906
ENSSSCG00000013724		G protein subunit gamma 14	9.80368	-1.61102	0.471619	-3.41594	0.00063562	0.00369387	0	2.13772	4.01573	8.02292	3.50619	6.2698	10.1111	22.2099	4.72274	9.26966	4.07895	2.27567	2.48882	1.15125	8.70493	2.69496	8.31653	5.62871	39.5914	13.5911	9.78561	9.81044	1.181	18.342	16.1677	0.897663	9.58311	3.37196	6.71757	6.17169	1.62915	8.46777	4.25839	73.2388	6.25648	21.947	6.12166
ENSSSCG00000037577	CHAC2	ChaC cation transport regulator homolog 2	33.4222	-1.60621	0.236538	-6.79048	1.1176e-11	8.69672e-10	16.5875	28.8593	19.0747	72.2063	26.647	54.8608	63.4241	45.4775	14.9553	41.7135	10.6053	29.5838	3.73323	10.3613	34.8197	17.9664	8.31653	24.9271	83.5818	25.2407	70.4564	49.0522	9.44796	56.2489	39.8803	51.1668	63.0888	16.8598	14.7787	19.3968	19.5497	57.7348	26.6149	50.1107	18.0743	33.566	7.65208
ENSSSCG00000010433	SGMS1	sphingomyelin synthase 1	2509.68	-1.60602	0.281544	-5.70432	1.16807e-08	3.76057e-07	800.808	6220.77	2020.92	6216.76	3403.1	4873.99	2046.12	2410.31	2074.07	729.986	1444.76	1764.79	837.488	1117.87	1897.67	863.285	784.526	5791.94	2794.49	346.574	4074.73	4259.69	494.837	5805.87	1666.35	4276.47	4328.37	1491.53	1093.62	1697.22	1783.1	4507.93	4058.25	923.194	1476.53	947.595	1532.71
ENSSSCG00000012318	MAGED1	MAGE family member D1	7593.17	-1.60119	0.232938	-6.87387	6.2483e-12	5.21282e-10	792.514	4134.36	4205.48	10863	3534.94	7209.49	10069.7	12994.9	6847.97	12197.7	3213.4	3661.56	3753.14	2842.44	11149.3	2592.55	2652.97	6832.45	8818.98	2007.61	7814.79	13427.6	1081.79	19146.6	16443.6	9745.03	8537.75	4866.87	5353.9	5605.66	3061.16	14989.5	12012.9	18714.4	3942.28	11814	4015.05
ENSSSCG00000042150		-	28.4099	-1.6006	0.397189	-4.02981	5.58213e-05	0.000481984	0	22.4461	12.0472	82.2349	13.3235	21.9443	33.0909	80.3789	21.2523	92.6966	8.97369	13.654	16.1773	13.815	15.6689	18.8647	1.38609	11.2574	68.1852	8.73717	10.7642	111.839	8.26697	58.6945	58.2037	38.5995	45.5198	3.37196	28.2138	0.88167	5.70201	30.7919	21.292	38.5467	4.17099	27.111	3.06083
ENSSSCG00000033422		store-operated calcium entry regulator STIMATE	257.349	-1.60047	0.232796	-6.87497	6.20024e-12	5.19772e-10	112.426	326.003	72.2832	331.948	295.922	338.569	534.05	208.35	172.38	206.25	109.316	102.405	109.508	109.369	130.574	96.1202	158.014	354.609	345.325	122.32	726.092	576.854	89.1651	819.278	372.935	380.609	459.191	173.094	84.6414	97.8654	155.583	366.424	271.472	246.699	101.494	253.036	111.72
ENSSSCG00000021998		solute carrier organic anion transporter family member 1B3	1325	-1.59983	0.385568	-4.14929	3.3351e-05	0.000314191	213.795	227.668	298.168	451.289	352.722	884.826	773.958	2831.24	1957.58	3881.67	1108.66	472.202	223.994	111.671	623.273	132.053	48.5131	926.325	3212.4	156.298	920.826	6016.75	252.733	849.848	9546.49	645.42	313.847	277.625	322.443	699.165	308.723	956.088	584.464	4018.5	250.259	3902.7	270.884
ENSSSCG00000041677		regulatory subunit of type II PKA R-subunit domain containing 1	16.805	-1.59931	0.484977	-3.29771	0.000974757	0.00528097	1.84306	6.41317	6.0236	8.02292	1.40247	2.35118	6.43433	20.0947	18.891	37.0786	10.6053	2.27567	2.48882	9.21002	10.4459	0.898319	5.54436	4.82461	61.5866	9.70796	7.82849	22.564	12.4005	9.78242	52.8145	4.48831	0.798593	3.37196	10.7481	1.76334	1.62915	19.2449	3.19379	113.713	15.2936	80.0421	35.9648
ENSSSCG00000017232	SLC9A3R1	SLC9A3 regulator 1	454.559	-1.59858	0.324016	-4.93365	8.07087e-07	1.36905e-05	273.694	361.275	123.484	530.516	298.026	693.597	705.019	511.886	151.128	701.018	138.684	121.749	97.0639	164.629	106.2	288.36	47.127	431.802	205.655	33.9779	1239.84	1081.11	98.0226	1497.93	1239.52	848.291	590.959	460.835	193.466	367.657	277.769	691.278	544.009	1083.16	66.0406	495.744	58.1558
ENSSSCG00000000634	STYK1	serine/threonine/tyrosine kinase 1	31.3702	-1.59726	0.641099	-2.49144	0.0127226	0.0415615	24.8813	35.2724	4.01573	8.02292	1.40247	155.178	34.9292	10.5762	4.72274	5.79354	3.26316	2.27567	26.1326	3.45376	106.2	0.898319	20.7913	16.8861	19.7957	11.6496	68.4993	21.583	1.77149	57.4717	6.46708	121.184	11.9789	52.8274	100.764	90.8121	2.44372	21.5543	62.8113	42.4014	0.695165	1.291	0
ENSSSCG00000051675		-	17.2597	-1.59396	0.506097	-3.14953	0.00163535	0.00799385	9.21528	43.8233	3.0118	38.1089	11.2198	31.349	46.8787	15.8642	31.4849	37.0786	14.6842	20.4811	4.97764	3.45376	3.48197	0.898319	2.77218	16.082	14.2969	0	9.78561	110.858	3.54299	15.8964	63.5929	20.6462	15.1733	0	2.68703	2.64501	0.814573	8.46777	0	3.85467	6.95165	24.529	0
ENSSSCG00000004680	TERB2	telomere repeat binding bouquet formation protein 2	31.5318	-1.58949	0.407207	-3.90341	9.48471e-05	0.0007543	5.52917	23.515	30.118	53.1519	46.2817	87.7772	32.1717	48.6504	36.2077	56.7767	13.0526	0	3.73323	2.3025	3.48197	30.5429	4.15827	48.2461	40.6912	6.79557	46.9709	68.6731	7.67647	45.2437	72.2157	44.8831	53.5057	8.99191	2.68703	21.1601	29.3246	53.8858	39.3901	44.3287	7.64681	40.021	6.88687
ENSSSCG00000011888	GPR156	G protein-coupled receptor 156	284.338	-1.58843	0.400574	-3.96537	7.32807e-05	0.000605543	41.4688	50.2365	115.452	111.318	253.848	144.989	188.434	501.31	700.54	855.126	765.211	26.1703	11.1997	24.1763	19.1508	54.7975	26.3357	111.77	306.833	655.287	242.683	592.551	431.654	293.473	638.085	134.649	140.552	3.37196	5.37406	60.8353	63.5367	171.665	57.4883	518.453	645.113	898.537	658.844
ENSSSCG00000004672	GATM	glycine amidinotransferase	280.96	-1.58801	0.237052	-6.69898	2.09873e-11	1.51117e-09	54.3702	80.1646	86.3383	267.765	56.8002	93.2633	161.778	1019.54	354.993	579.354	152.553	96.7161	72.1758	63.3189	154.948	81.7471	67.9184	186.551	491.593	136.882	280.847	1042.85	215.532	497.681	963.595	200.179	201.245	40.4636	40.3054	59.0719	109.153	167.046	145.85	824.9	103.58	1112.84	131.616
ENSSSCG00000039013	NOTUM	notum, palmitoleoyl-protein carboxylesterase	257.426	-1.58683	0.378079	-4.19709	2.70368e-05	0.000262332	76.4868	505.572	367.44	491.404	645.138	396.565	584.605	147.009	329.018	677.844	312.448	62.581	60.9761	110.52	109.682	30.5429	45.7409	71.565	169.363	85.4301	327.818	373.778	338.946	258.011	578.803	233.392	169.302	14.6118	17.4657	74.0603	83.901	345.639	515.265	443.287	50.0519	369.226	51.2689
ENSSSCG00000023026	CLCN5	chloride voltage-gated channel 5	48.8906	-1.58515	0.275358	-5.7567	8.57728e-09	2.86234e-07	10.1368	21.3772	21.0826	54.1547	37.1656	79.1562	43.2019	48.6504	22.0395	31.2851	21.2105	20.4811	13.6885	10.3613	40.0427	23.3563	11.0887	143.934	45.0902	32.0363	77.3063	120.668	30.7059	92.933	169.222	70.9154	47.117	38.2156	20.1527	29.9768	26.8809	98.5341	53.2299	111.786	11.8178	51.64	28.3127
ENSSSCG00000002258	KLHL25	kelch like family member 25	45.9437	-1.58111	0.489764	-3.22831	0.00124523	0.00643234	28.5674	50.2365	18.0708	26.0745	61.7089	97.1819	56.0706	22.2099	14.9553	31.2851	6.52632	9.1027	8.71087	10.3613	1.74099	8.08487	20.7913	160.82	2.19952	0.970796	196.691	111.839	9.44796	177.306	92.6948	88.8686	121.386	58.4474	9.4046	43.2019	21.1789	60.814	22.3565	11.564	9.7323	19.365	9.9477
ENSSSCG00000041589		-	3.22896	-1.58014	0.623666	-2.53364	0.0112885	0.0376784	3.68611	2.13772	0	3.0086	1.40247	1.56745	4.59595	1.05762	4.72274	12.7458	13.0526	0	0	0	0	0	0	0.804101	3.29928	6.79557	4.89281	1.96209	4.72398	2.44561	3.23354	4.48831	3.99296	0	0	5.29002	0.814573	1.53959	2.1292	3.85467	7.64681	5.164	8.41729
ENSSSCG00000033196	MYORG	myogenesis regulating glycosidase (putative)	536.425	-1.57779	0.311943	-5.05794	4.2381e-07	8.02003e-06	96.7605	312.108	817.202	944.699	307.142	948.307	745.463	604.957	460.467	625.702	240.658	87.6134	95.8195	627.433	313.377	374.599	119.204	573.324	592.771	297.064	883.641	751.48	388.547	919.548	911.858	1117.59	741.893	78.6792	99.42	227.471	152.325	1009.2	775.027	1239.28	240.527	898.537	228.032
ENSSSCG00000006040	DPYS	dihydropyrimidinase	745.534	-1.57733	0.254547	-6.19663	5.76866e-10	2.76529e-08	248.813	137.883	141.555	597.708	161.285	539.987	448.565	1130.59	923.296	2722.96	766.843	94.4405	215.283	89.7977	193.249	218.292	80.3932	448.688	569.676	368.903	749.578	2072.95	235.018	896.314	3092.34	444.343	341.798	242.781	216.306	421.438	156.398	830.611	536.557	2879.44	640.942	3143.59	586.149
ENSSSCG00000001882	NEIL1	nei like DNA glycosylase 1	149.005	-1.57706	0.270329	-5.83387	5.41555e-09	1.95377e-07	43.3118	63.0628	88.3461	243.696	57.5015	159.096	188.434	182.968	140.895	265.344	91.3685	42.1	24.8882	66.7726	57.4525	53.8992	81.7793	73.9773	214.453	45.6274	188.862	312.953	41.9253	316.706	366.468	128.366	115.796	41.5876	40.3054	42.3202	43.1724	176.284	83.0386	824.9	61.1745	464.76	79.5816
ENSSSCG00000024402		pregnancy zone protein	24540.7	-1.5756	0.238801	-6.59797	4.16821e-11	2.67892e-09	9908.27	21910.6	10799.3	25547	11118.8	26079.2	24635.2	31359.4	10768.6	24852	12697.8	13454.9	14733.8	10957.6	26123.5	6323.27	4220.64	54309.8	31687.4	3988.03	67927.8	71571.1	5649.88	47448.4	71946.2	29639	46368.7	19654.1	12634.4	16929	5721.56	31703.3	27085.5	38253.8	6202.95	27862.4	5931.89
ENSSSCG00000033592	TMC8	transmembrane channel like 8	19.9915	-1.5754	0.348909	-4.51523	6.32491e-06	7.757e-05	9.21528	23.515	5.01967	49.1404	23.8421	27.4304	35.8484	6.3457	10.2326	9.26966	7.34211	2.27567	3.73323	17.2688	13.9279	11.6782	5.54436	53.8748	7.69833	2.91239	30.3354	11.7725	4.72398	70.9226	14.012	36.8042	75.0677	19.1078	16.1222	14.1067	32.5829	26.9429	12.7752	9.63668	8.34198	18.074	12.2433
ENSSSCG00000013087	TKFC	triokinase and FMN cyclase	461.914	-1.57308	0.239272	-6.57442	4.88416e-11	3.08199e-09	164.954	298.212	180.708	966.762	366.046	610.522	599.312	344.783	330.592	479.705	218.632	145.643	163.018	505.4	625.014	269.496	227.319	509.8	288.137	216.488	694.778	627.868	130.5	868.19	494.731	1901.25	709.15	258.517	251.237	193.968	313.61	1206.27	478.004	474.125	278.066	429.903	270.118
ENSSSCG00000007501	BMP7	bone morphogenetic protein 7	90.5785	-1.57218	0.430688	-3.65039	0.000261838	0.00176385	6.4507	56.6497	71.2793	265.759	42.0742	227.28	138.798	9.51855	8.65836	3.47612	17.9474	18.2054	23.6438	297.023	506.627	20.6613	83.1653	41.0092	41.7909	54.3646	140.913	26.4882	20.0769	135.731	22.6348	166.965	194.857	73.0592	106.138	14.9884	17.9206	181.672	250.18	17.346	16.684	20.656	10.7129
ENSSSCG00000034882		-	63.7338	-1.57188	0.397453	-3.9549	7.65671e-05	0.000629402	6.4507	35.2724	5.01967	74.212	62.4101	78.3725	96.515	87.7822	35.4206	158.743	11.4211	17.0676	9.95528	11.5125	8.70493	13.4748	18.0192	79.606	41.7909	10.6788	132.106	206.019	9.44796	176.084	232.815	48.4738	71.0747	124.763	12.0916	60.8353	28.51	83.1381	72.3926	84.8028	13.2081	120.063	19.8954
ENSSSCG00000036078	KCNJ3	potassium inwardly rectifying channel subfamily J member 3	6.47966	-1.57069	0.636895	-2.46617	0.0136568	0.0439924	0	2.13772	0	1.00287	2.10371	3.91863	3.67676	9.51855	22.0395	8.11095	9.78948	0	0	0	3.48197	0	0	0.804101	3.29928	2.91239	3.91424	9.81044	10.0385	0	12.9342	2.69299	0	2.24798	5.37406	2.64501	4.88744	7.69797	5.32299	5.78201	43.1002	0	50.5037
ENSSSCG00000027454	QPRT	quinolinate phosphoribosyltransferase	1308.5	-1.56857	0.209943	-7.47143	7.93298e-14	1.1192e-11	329.907	966.251	680.667	1665.76	617.79	1290.01	1518.5	2763.55	1411.31	2702.11	1133.13	722.526	389.5	501.946	658.092	337.768	346.522	948.839	1767.32	409.676	2196.87	3498.4	359.023	2662.04	3356.41	1218.13	1145.98	597.962	399.024	648.028	396.697	1703.56	1328.62	3575.21	536.667	3082.91	547.889
ENSSSCG00000050398		-	117.439	-1.56677	0.341592	-4.58669	4.50335e-06	5.87569e-05	41.4688	137.883	56.2203	109.312	138.845	189.661	184.757	98.3583	57.46	140.204	40.7895	71.6837	44.7987	44.8988	55.7115	47.6109	20.7913	877.274	51.6888	9.70796	209.412	196.209	27.7534	184.643	196.168	143.626	159.719	73.0592	53.7406	85.522	96.1196	137.024	94.7492	80.9481	52.8325	99.4071	35.1996
ENSSSCG00000044318		-	54.4014	-1.5666	0.409801	-3.82284	0.000131924	0.00100187	3.68611	9.61975	53.2085	85.2435	38.568	32.1327	73.5352	147.009	16.5296	142.521	5.71053	21.6189	9.95528	36.8401	60.9345	29.6445	11.0887	7.23691	179.261	12.6204	31.314	161.872	11.2195	132.063	116.407	61.0411	35.1381	5.61994	14.7787	2.64501	8.14573	46.1878	35.1317	281.391	2.08549	87.7881	3.06083
ENSSSCG00000001780	FAH	fumarylacetoacetate hydrolase	2478.87	-1.56286	0.221145	-7.06711	1.58192e-12	1.62433e-10	426.668	1339.28	1272.99	3952.29	1040.64	1846.46	3003.91	4190.28	1161.01	3821.42	949.58	900.029	881.042	1277.89	3130.29	1440.9	1174.02	1601.77	5779.24	1032.93	3539.46	4585.4	303.516	3945.98	4384.68	2277.37	2368.63	1150.96	1436.22	808.492	724.155	3344.77	2829.7	11047.5	1134.51	6483.41	1130.98
ENSSSCG00000013729	GCDH	glutaryl-CoA dehydrogenase	533.187	-1.55878	0.226131	-6.89326	5.45269e-12	4.70749e-10	201.815	366.62	190.747	698.997	391.29	564.282	794.18	685.335	266.048	891.046	192.526	282.184	163.018	212.982	339.492	220.987	219.002	405.267	1159.15	229.108	1326.93	1381.31	124.595	1235.03	993.774	362.656	419.261	223.674	214.962	213.364	183.279	527.311	616.402	2066.1	120.263	1089.6	155.337
ENSSSCG00000039861	HDHD3	haloacid dehalogenase like hydrolase domain containing 3	351.308	-1.5581	0.231924	-6.71815	1.84049e-11	1.34193e-09	121.642	307.832	180.708	665.902	208.267	450.642	612.181	362.762	303.042	485.498	268.395	102.405	87.1087	233.704	120.128	172.477	134.451	152.779	443.204	272.794	558.758	313.934	263.362	563.712	253.294	412.925	352.179	169.722	133.008	281.253	131.961	759.79	524.847	1449.36	334.374	455.723	354.291
ENSSSCG00000003776	ACADM	acyl-CoA dehydrogenase medium chain	1536.82	-1.55158	0.222775	-6.96478	3.28921e-12	3.01998e-10	515.134	1193.92	532.085	1757.02	1508.36	2100.38	1844.82	3240.54	1893.82	2098.42	812.527	507.475	495.275	470.862	705.099	792.318	332.661	2216.1	3578.62	773.725	2370.08	3272.76	1450.26	2522.64	3664.68	1997.3	1427.09	535.018	468.886	718.561	832.493	1592.71	1758.72	3594.48	791.097	1755.76	740.721
ENSSSCG00000014880	AQP11	aquaporin 11	34.7387	-1.55153	0.393183	-3.94608	7.9442e-05	0.000648428	3.68611	17.1018	5.01967	20.0573	40.6718	47.0235	55.1514	42.3047	46.4403	67.205	28.5527	17.0676	9.95528	6.90751	6.96394	20.6613	0	46.6379	68.1852	11.6496	76.3278	115.763	25.3914	111.275	105.629	16.1579	28.7493	15.7358	5.37406	19.3968	20.3643	33.1013	40.4547	48.1834	17.3791	34.857	9.9477
ENSSSCG00000016487	MGAM2	maltase-glucoamylase 2 (putative)	39.3591	-1.54823	0.267962	-5.77779	7.569e-09	2.57539e-07	23.9597	35.2724	23.0905	63.1805	14.726	54.077	89.1615	51.8232	28.3364	40.5548	40.7895	13.654	19.9106	11.5125	10.4459	19.763	18.0192	123.027	52.7885	10.6788	45.9924	75.5404	17.1244	74.591	77.6049	59.2458	60.693	24.7277	16.1222	25.5684	9.77487	26.9429	22.3565	59.7474	27.1114	51.64	36.73
ENSSSCG00000023904		-	15.2316	-1.54785	0.49704	-3.11414	0.00184482	0.00879327	2.76458	3.20658	15.059	19.0544	7.71361	12.5396	12.8687	20.0947	2.36137	16.2219	0.81579	0	0	11.5125	6.96394	16.1697	5.54436	10.4533	32.9928	10.6788	13.6999	28.4503	4.13348	67.2542	14.012	8.07897	33.5409	3.37196	4.03054	0	4.07286	14.6261	12.7752	102.149	0.695165	42.603	3.06083
ENSSSCG00000016606	ASB15	ankyrin repeat and SOCS box containing 15	8.25304	-1.54725	0.381735	-4.05321	5.052e-05	0.000445547	6.4507	5.34431	1.00393	9.02579	3.50619	16.4582	11.9495	9.51855	17.3167	2.31741	7.34211	1.13784	1.24441	3.45376	1.74099	5.38992	1.38609	15.2779	23.095	3.88319	15.657	15.6967	10.0385	12.228	17.2455	17.9533	14.3747	8.99191	5.37406	2.64501	4.07286	6.92818	4.25839	1.92734	6.25648	6.45501	8.41729
ENSSSCG00000015790	SLC25A4	solute carrier family 25 member 4	2871	-1.54683	0.240636	-6.4281	1.29206e-10	7.27958e-09	765.79	1484.65	1447.67	3516.05	2751.65	3724.26	3465.35	6451.46	3446.81	4839.92	1787.4	598.502	563.718	1768.32	1342.3	1756.21	899.572	1772.24	5687.96	2292.05	2662.67	6808.45	1603.2	4250.46	4310.31	3943.43	2830.21	567.614	806.108	992.761	889.513	4969.81	3531.27	6568.36	2317.68	6347.85	2465.5
ENSSSCG00000008233	TMEM150A	transmembrane protein 150A	532.798	-1.54632	0.337173	-4.58615	4.51501e-06	5.88648e-05	144.68	968.389	251.987	632.808	748.22	883.258	702.261	839.747	591.917	724.192	305.106	201.397	146.84	148.512	194.99	146.426	29.1079	751.835	712.645	69.8973	1010.85	1094.85	124.595	1407.45	1046.59	658.885	874.459	671.021	153.161	454.06	493.631	698.206	764.381	427.869	155.022	351.152	133.146
ENSSSCG00000028920	POLDIP2	DNA polymerase delta interacting protein 2	346.152	-1.54615	0.392824	-3.93599	8.28561e-05	0.00067187	141.915	392.272	53.2085	415.186	352.722	688.111	486.252	233.733	153.489	290.836	66.079	110.37	108.264	62.1676	83.5673	166.189	58.2157	613.529	149.567	16.5035	1137.09	855.471	66.7262	1116.42	755.57	627.466	626.895	662.029	147.787	371.183	274.511	491.9	569.56	225.498	31.2824	163.957	42.0864
ENSSSCG00000012761		-	13.104	-1.54371	0.433226	-3.56329	0.000366235	0.0023365	0.921528	5.34431	23.0905	52.149	2.80495	24.2955	45.0403	12.6914	4.72274	11.5871	0	4.55135	3.73323	27.6301	12.1869	6.28823	5.54436	9.64921	15.3967	1.94159	21.5283	10.7915	1.181	62.3629	12.9342	10.772	15.9719	4.49595	4.03054	3.52668	3.25829	16.9355	10.646	25.0554	0.695165	10.328	0.765208
ENSSSCG00000034069		-	6.94965	-1.541	0.467441	-3.29668	0.000978334	0.00529267	0	7.48203	1.00393	7.02006	4.20742	3.1349	11.0303	14.8066	11.8069	8.11095	3.26316	3.41351	1.24441	2.3025	3.48197	0.898319	5.54436	4.82461	19.7957	1.94159	12.7213	21.583	4.72398	14.6736	11.8563	0.897663	3.99296	1.12399	5.37406	2.64501	4.07286	3.84899	4.25839	21.2007	5.56132	6.45501	16.8346
ENSSSCG00000016676	INMT	indolethylamine N-methyltransferase	533.897	-1.53723	0.356945	-4.30664	1.65756e-05	0.000174642	147.445	113.299	82.3225	427.221	396.9	406.753	498.201	686.393	769.02	2009.2	444.606	83.0621	176.706	131.243	266.371	54.7975	30.494	65.1322	1152.55	692.178	456.01	1175.29	380.871	243.338	1540.24	139.138	150.934	75.3072	55.0841	84.6404	64.3512	219.392	193.757	3594.48	304.482	2097.88	345.109
ENSSSCG00000011410	CYB561D2	cytochrome b561 domain-containing protein 2	55.8068	-1.53696	0.306851	-5.00881	5.47688e-07	9.87946e-06	18.4306	52.3742	26.1023	60.1719	65.9163	52.5096	70.7777	52.8808	51.9501	57.9354	31.8158	6.82702	14.9329	16.1175	29.5967	29.6445	13.8609	56.2871	153.967	41.7442	123.299	129.498	25.3914	185.866	111.018	53.8598	41.5268	37.0916	10.7481	28.2135	48.0598	65.4328	70.2634	125.277	27.8066	51.64	26.0171
ENSSSCG00000001755	HYKK	hydroxylysine kinase	70.1839	-1.53649	0.288385	-5.32792	9.93414e-08	2.33904e-06	23.9597	29.9281	20.0787	50.1433	13.3235	61.1306	57.909	253.828	144.044	176.124	49.7632	15.9297	6.22205	27.6301	47.0066	17.0681	16.6331	12.8656	140.769	92.2256	34.2496	161.872	58.4593	73.3682	139.042	46.6785	27.1522	11.2399	17.4657	22.0418	26.0663	72.3609	31.9379	343.066	41.0147	193.65	40.556
ENSSSCG00000030305	SLC15A2	solute carrier family 15 member 2	307.472	-1.53504	0.269808	-5.68939	1.27494e-08	4.0446e-07	60.8209	76.958	73.2871	323.925	56.8002	191.229	250.02	931.76	321.933	1002.28	200.684	169.538	78.3978	142.755	238.515	39.526	55.4436	177.706	623.564	77.6637	193.755	1287.13	77.9457	366.841	1105.87	131.059	135.761	61.8194	91.3589	65.2436	59.4638	234.788	122.429	986.796	196.036	959.214	208.137
ENSSSCG00000025992	ENPP3	ectonucleotide pyrophosphatase/phosphodiesterase 3	890.278	-1.53447	0.336844	-4.55542	5.22803e-06	6.62688e-05	444.177	683.003	512.006	921.633	1262.93	1171.67	1386.14	894.744	396.71	697.542	364.658	227.567	283.725	204.923	261.148	602.772	130.292	1710.32	1202.04	296.093	1934.62	2934.3	472.398	2455.39	3326.23	2581.68	849.703	345.064	347.97	227.471	329.087	818.295	1341.39	911.63	123.044	163.957	123.964
ENSSSCG00000030544	TMEM143	transmembrane protein 143	46.4279	-1.52781	0.223605	-6.83264	8.33683e-12	6.69764e-10	23.9597	36.3413	18.0708	38.1089	28.0495	43.8886	55.1514	68.7451	25.1879	63.7289	14.6842	14.7919	14.9329	14.9663	40.0427	16.1697	40.1966	31.3599	74.7837	33.0071	91.9848	147.157	22.4389	108.829	109.94	49.3715	55.9015	11.2399	20.1527	7.05336	18.7352	65.4328	45.7777	115.64	36.1486	89.0791	26.7823
ENSSSCG00000003472	ARHGEF19	Rho guanine nucleotide exchange factor 19	18.8754	-1.52678	0.333334	-4.58032	4.64271e-06	6.03712e-05	11.0583	12.8263	3.0118	13.0372	14.726	29.7816	30.3333	25.3828	18.891	40.5548	21.2105	3.41351	1.24441	9.21002	3.48197	8.08487	12.4748	12.8656	28.5938	18.4451	30.3354	27.4692	21.8484	41.5753	20.4791	35.0089	18.3676	12.3639	4.03054	2.64501	22.808	35.4107	29.8087	5.78201	28.5017	18.074	25.2519
ENSSSCG00000023267	SCN1B	sodium voltage-gated channel beta subunit 1	33.3158	-1.52372	0.305772	-4.98319	6.25439e-07	1.10974e-05	6.4507	71.6137	47.1849	70.2006	20.3359	66.6166	38.606	29.6133	8.65836	40.5548	8.1579	4.55135	8.71087	33.3863	27.8558	14.3731	16.6331	30.5558	15.3967	18.4451	28.3783	19.6209	11.81	92.933	25.8683	82.585	83.0536	13.4879	14.7787	16.7517	48.0598	48.4972	71.328	28.91	20.8549	34.857	13.0085
ENSSSCG00000008615	VSNL1	visinin like 1	59.6852	-1.52318	0.355033	-4.29026	1.78461e-05	0.000185328	19.3521	13.8952	2.00787	27.0774	15.4272	34.4839	38.606	138.548	81.0737	199.298	35.079	19.3432	18.6661	18.42	8.70493	4.4916	11.0887	9.64921	125.373	72.8097	63.6065	159.91	103.337	36.6841	201.557	22.4416	9.58311	5.61994	14.7787	26.4501	7.33115	63.1234	52.1653	242.844	54.918	200.105	50.5037
ENSSSCG00000011640	TF	transferrin	70422.9	-1.5227	0.324287	-4.69555	2.65892e-06	3.76655e-05	23769	61100.4	17928.2	60195	20650	69582.3	46992.7	196461	66090.8	126460	32269.4	38811.6	30875	26339.5	25502	24761.3	3892.14	88995.5	118453	5997.58	84835.4	202436	9158.62	181086	231765	70822.9	66458.9	77892.4	30693.9	36422.7	14231.4	90512.8	66743.9	219036	23662.7	91426.1	23338.1
ENSSSCG00000039539	DHTKD1	dehydrogenase E1 and transketolase domain containing 1	449.122	-1.52107	0.201087	-7.56422	3.90187e-14	5.93939e-12	107.819	206.29	254.999	762.178	175.309	660.68	628.726	541.5	128.301	809.936	114.211	221.878	182.928	249.822	290.745	232.665	286.92	577.345	863.312	141.736	782.849	931.011	56.0973	732.459	1142.52	544.881	477.558	182.086	157.191	183.387	132.775	464.188	498.232	1511.03	61.8697	1247.11	74.9904
ENSSSCG00000039983	GJA4	gap junction protein alpha 4	123.366	-1.51989	0.29199	-5.20528	1.937e-07	4.12427e-06	61.7424	98.3353	21.0826	99.2837	115.704	150.475	169.131	259.116	142.469	200.456	81.579	26.1703	68.4425	17.2688	60.9345	18.8647	16.6331	75.5855	247.446	229.108	126.234	127.536	213.76	193.203	137.964	161.579	111.004	116.895	29.5573	35.2668	118.113	178.593	157.56	225.498	157.802	158.793	155.337
ENSSSCG00000010337	MAT1A	methionine adenosyltransferase 1A	9017.02	-1.51982	0.219373	-6.92804	4.26719e-12	3.81693e-10	3106.47	10200.1	6517.54	11050.6	8198.16	11702.6	17456.3	12125.6	4528.32	11030.9	4080.58	4992.83	4269.57	3027.79	8306.24	2251.19	2817.92	7370.39	14896.3	1795	21203.5	19799.4	1169.78	22329.6	14427	8594.23	11905.4	8034.27	4328.8	5344.69	3886.33	10501.6	12053.4	21493.7	2919	12969.4	2945.28
ENSSSCG00000023472	FMO3	flavin containing dimethylaniline monoxygenase 3	183.303	-1.51744	0.347081	-4.372	1.23114e-05	0.000134788	53.4486	42.7545	76.2989	250.716	96.0695	114.424	155.343	545.73	315.636	320.962	181.105	79.6486	42.3099	102.461	269.853	85.3403	18.0192	96.4921	857.813	218.429	152.656	401.247	99.2036	189.534	452.695	82.585	55.9015	16.8598	42.9924	85.522	31.7683	140.873	84.1032	558.928	77.1633	263.364	123.964
ENSSSCG00000017888	SLC13A5	solute carrier family 13 member 5	609.157	-1.51654	0.326164	-4.64963	3.3253e-06	4.56518e-05	65.4285	405.099	191.751	1088.11	24.5433	295.464	390.656	612.36	22.0395	776.334	53.0264	805.589	180.439	699.961	1364.93	128.46	363.155	1433.71	1163.55	32.0363	1060.76	2749.87	28.9344	841.288	604.672	764.809	1337.64	613.698	486.352	445.244	240.299	1147.77	904.908	387.395	36.1486	748.781	43.6168
ENSSSCG00000026200	PROK2	prokineticin 2	2.4025	-1.51391	0.607053	-2.49387	0.0126358	0.0413402	0.921528	0	1.00393	6.01719	1.40247	1.56745	0	3.17285	0.787123	1.15871	2.44737	0	1.24441	3.45376	13.9279	0	0	1.6082	0	0.970796	2.93568	0.981044	1.77149	7.33682	1.07785	1.79533	3.99296	3.37196	1.34351	2.64501	1.62915	5.38858	6.38759	1.92734	0.695165	5.164	0.765208
ENSSSCG00000002297	RDH12	retinol dehydrogenase 12	3.91335	-1.50832	0.450384	-3.34896	0.000811152	0.00454684	2.76458	2.13772	3.0118	10.0287	3.50619	10.1884	10.1111	7.40332	0.787123	4.63483	0.81579	0	0	1.15125	3.48197	2.69496	2.77218	4.82461	8.79809	0	2.93568	3.92418	0.590498	8.55962	6.46708	1.79533	5.59015	2.24798	2.68703	0	3.25829	3.84899	3.19379	15.4187	0	5.164	0
ENSSSCG00000027381	GGCX	gamma-glutamyl carboxylase	1025.31	-1.50793	0.151183	-9.97417	1.97746e-23	2.28766e-20	356.631	1219.57	541.12	1613.61	760.842	1350.36	1275.84	1075.6	765.871	1199.26	575.948	543.886	399.455	526.122	1081.15	530.008	401.966	1128.96	1680.43	462.099	1867.09	1852.21	405.672	2866.25	1496.05	1438.06	1293.72	555.25	565.619	778.515	623.963	1657.37	1577.73	1370.34	516.507	1034.09	549.419
ENSSSCG00000004598		myocardial zonula adherens protein	79.7631	-1.50765	0.266351	-5.66039	1.51029e-08	4.68837e-07	30.4104	81.2335	32.1259	88.2521	101.679	130.098	71.6968	145.951	144.044	169.171	60.3685	28.4459	37.3323	11.5125	19.1508	32.3395	18.0192	82.0183	79.1828	23.2991	108.62	111.839	33.0679	143.068	167.066	88.8686	83.0536	24.7277	24.1833	59.9536	50.5035	141.643	177.788	98.2942	59.089	130.391	62.747
ENSSSCG00000028943	ECH1	enoyl-CoA hydratase 1	300.844	-1.50433	0.217701	-6.91006	4.84433e-12	4.26719e-10	71.8792	222.323	91.3579	530.516	185.127	238.252	407.201	380.742	215.672	390.484	199.053	150.194	123.197	134.697	160.171	174.274	108.115	249.271	343.125	97.0796	655.636	668.091	118.1	939.113	533.534	370.735	308.257	195.574	171.97	196.613	178.391	447.252	400.289	688.059	145.985	497.035	143.859
ENSSSCG00000033392	SCML4	Scm polycomb group protein like 4	423.462	-1.50172	0.209577	-7.16548	7.7515e-13	8.79162e-11	103.211	712.931	210.826	799.284	193.541	492.179	502.797	530.923	380.968	509.831	257.79	279.908	322.302	160.024	661.574	120.375	126.134	693.939	536.683	145.619	301.397	610.21	79.7172	820.501	546.468	489.226	461.587	313.593	499.787	290.07	158.842	759.02	608.95	876.938	286.408	579.659	244.866
ENSSSCG00000008237	RETSAT	retinol saturase	708.972	-1.49881	0.257334	-5.8244	5.73182e-09	2.04106e-07	162.189	422.2	244.96	585.673	774.166	830.749	781.312	1292.41	756.426	1473.88	368.737	250.324	158.04	183.049	210.659	223.681	98.4123	717.258	1017.28	333.954	1024.55	2113.17	292.887	1513.83	2368.03	675.043	655.645	283.245	166.596	332.39	395.068	606.6	735.637	1563.07	410.147	1831.93	378.778
ENSSSCG00000045093		-	5.51847	-1.49324	0.499729	-2.98811	0.00280709	0.012239	0	3.20658	2.00787	4.01146	3.50619	3.1349	1.83838	8.46093	8.65836	5.79354	5.71053	0	0	1.15125	1.74099	6.28823	1.38609	7.23691	17.5962	3.88319	9.78561	11.7725	8.26697	17.1192	16.1677	2.69299	3.19437	0	2.68703	0	4.07286	1.53959	4.25839	17.346	5.56132	6.45501	7.65208
ENSSSCG00000009666	EPHX2	epoxide hydrolase 2	881.521	-1.4922	0.220042	-6.78146	1.1897e-11	9.21649e-10	145.601	418.994	377.479	1059.03	640.23	806.453	725.241	1594.89	884.727	1999.93	549.843	253.738	265.059	345.376	579.748	252.428	128.906	539.552	1381.3	472.778	1296.59	2288.78	363.156	1411.11	2954.38	881.505	869.667	510.291	381.558	439.954	341.306	1120.82	956.009	2540.23	386.512	2072.06	381.073
ENSSSCG00000024814	PFKFB1	6-phosphofructo-2-kinase/fructose-2,6-biphosphatase 1	71.2787	-1.49218	0.36872	-4.04692	5.18965e-05	0.000454828	13.8229	25.6527	49.1927	64.1834	37.8668	55.6445	95.5958	80.3789	75.5638	213.202	39.1579	37.5486	31.1102	23.025	53.9705	17.0681	31.88	19.2984	256.244	23.2991	85.1348	173.645	7.08597	63.5857	114.252	30.5205	30.3465	3.37196	28.2138	18.5151	10.5894	79.2891	55.3591	337.284	25.7211	304.676	26.0171
ENSSSCG00000000038	CYB5R3	NADH-cytochrome b5 reductase 3-like	279.905	-1.49105	0.314871	-4.73543	2.18591e-06	3.19562e-05	106.897	153.916	68.2675	269.771	227.902	269.601	408.121	306.709	158.212	400.913	108.5	100.13	93.3307	79.4364	53.9705	144.629	52.6714	230.777	144.069	57.277	722.178	1200.8	138.767	887.755	926.948	387.79	471.968	161.854	94.046	104.919	202.014	347.179	276.795	626.384	82.0294	227.216	62.747
ENSSSCG00000002622	TMEM14A	transmembrane protein 14A	59.2832	-1.49058	0.325743	-4.57595	4.74073e-06	6.1355e-05	26.7243	32.0658	10.0393	69.1977	70.1237	88.5609	78.1312	93.0702	91.3063	130.934	44.8685	9.1027	6.22205	27.6301	13.9279	31.4412	8.31653	36.9887	117.674	32.0363	103.727	122.631	51.9638	125.949	140.12	65.5294	79.8593	14.6118	12.0916	24.6868	58.6492	68.512	45.7777	121.422	38.9292	76.1691	24.4866
ENSSSCG00000026852	NPPC	natriuretic peptide C	5.887	-1.49043	0.521427	-2.85837	0.00425824	0.0171805	1.84306	2.13772	4.01573	2.00573	1.40247	8.62098	7.35352	10.5762	9.44548	5.79354	3.26316	1.13784	0	0	1.74099	3.59328	0	7.23691	9.89785	20.3867	4.89281	11.7725	28.9344	1.2228	10.7785	6.28364	3.19437	2.24798	2.68703	0	0.814573	3.84899	0	9.63668	15.9888	1.291	13.7737
ENSSSCG00000039244	PHYH	phytanoyl-CoA 2-hydroxylase	917.72	-1.48724	0.31013	-4.79554	1.62236e-06	2.52492e-05	156.66	196.671	416.632	1505.3	572.911	561.931	633.322	2913.73	1022.47	1507.48	566.158	142.23	180.439	271.696	224.587	479.702	361.769	367.474	2013.66	651.404	1064.67	2293.68	506.056	1191.01	2781.92	481.147	582.174	89.9191	98.0765	196.613	271.253	735.926	468.423	4157.26	466.455	3159.08	665.731
ENSSSCG00000049444		-	8.88096	-1.48614	0.401884	-3.69792	0.000217372	0.0015213	2.76458	9.61975	5.01967	23.0659	4.90866	10.1884	12.8687	21.1523	7.08411	16.2219	4.89474	2.27567	8.71087	1.15125	8.70493	0.898319	0	10.4533	15.3967	0	12.7213	16.6778	0	8.55962	18.3234	9.87429	2.39578	15.7358	2.68703	8.8167	0.814573	13.8564	10.646	25.0554	2.08549	14.201	0.765208
ENSSSCG00000032721	TRAF3IP3	TRAF3 interacting protein 3	272.183	-1.48563	0.274182	-5.4184	6.01344e-08	1.53008e-06	85.7021	121.85	220.865	314.9	300.13	419.293	246.343	757.253	397.497	563.132	398.921	52.3405	36.0879	105.915	52.2296	114.985	66.5323	176.098	334.327	245.611	496.131	543.499	239.742	402.302	569.103	259.425	325.826	39.3396	30.9008	53.7819	106.709	206.306	193.757	587.838	218.977	587.405	199.719
ENSSSCG00000006873	FRRS1	ferric chelate reductase 1	144.759	-1.48379	0.253142	-5.86148	4.58756e-09	1.67596e-07	50.6841	94.0598	73.2871	230.659	192.139	438.102	284.03	105.762	143.256	83.4269	108.5	73.9594	62.2205	89.7977	167.135	86.2386	34.6522	230.777	156.166	82.5177	165.377	191.304	158.253	364.395	224.192	306.103	171.697	15.7358	72.5498	60.8353	95.305	115.47	184.175	131.059	78.5536	130.391	103.303
ENSSSCG00000008213	CD8B	CD8b molecule	37.8918	-1.4791	0.395431	-3.74047	0.000183674	0.00131761	23.9597	175.293	10.0393	46.1318	9.81732	138.719	100.192	7.40332	8.65836	5.79354	4.89474	19.3432	28.6214	32.2351	71.3804	5.38992	9.70262	8.84511	25.2945	20.3867	43.0567	3.92418	10.0385	18.342	3.23354	47.5761	11.1803	43.8355	44.336	104.037	18.7352	163.967	102.201	11.564	2.78066	14.201	6.88687
ENSSSCG00000005663		kynurenine aminotransferase 1	326.294	-1.47611	0.21572	-6.8427	7.77126e-12	6.30162e-10	159.424	229.805	137.539	495.415	248.939	460.047	533.13	554.191	447.873	655.828	284.711	91.027	79.6422	157.722	106.2	134.748	137.223	180.923	402.512	247.553	437.417	554.29	149.396	629.743	559.402	394.972	369.748	119.143	61.8016	216.891	203.643	507.296	409.87	707.332	169.62	606.77	231.093
ENSSSCG00000015054	NNMT	nicotinamide N-methyltransferase	7638.68	-1.47609	0.286639	-5.14966	2.60963e-07	5.33392e-06	4044.59	20651.5	4155.28	21375.1	3940.95	12054.5	14670.3	2815.38	488.016	1448.38	1855.92	4098.49	2992.8	7570.64	9087.94	7267.4	5221.4	9814.86	8530.84	294.151	17721.7	3345.36	118.69	16765.8	701.678	13505.3	21132.4	10236.2	5587.67	7006.64	6715.34	13657	18426.1	1798.2	1441.77	819.786	1273.31
ENSSSCG00000004889	SERPINB10	serpin family B member 10	10.6842	-1.4758	0.431513	-3.42007	0.000626061	0.0036481	7.37223	8.55089	6.0236	18.0516	20.3359	9.4047	12.8687	2.11523	12.594	8.11095	2.44737	2.27567	1.24441	3.45376	10.4459	1.79664	2.77218	32.164	20.8955	0	54.7994	12.7536	8.85746	11.0052	7.54492	21.5439	18.3676	10.1159	6.71757	3.52668	10.5894	11.547	5.32299	9.63668	2.08549	10.328	7.65208
ENSSSCG00000006780	WNT2B	Wnt family member 2B	61.7707	-1.47344	0.309184	-4.76556	1.88331e-06	2.84927e-05	28.5674	117.575	41.1613	64.1834	37.8668	38.4025	44.1211	53.9384	62.9699	75.316	44.0527	18.2054	13.6885	24.1763	33.0787	26.9496	26.3357	86.0388	92.3799	38.8319	250.512	112.82	59.6403	202.985	56.048	66.4271	85.4494	41.5876	12.0916	14.1067	85.5301	46.1878	46.8423	65.5294	41.7099	94.2431	35.9648
ENSSSCG00000010116	SLC25A1	solute carrier family 25 member 1	1373.49	-1.47175	0.172806	-8.51677	1.64064e-17	6.18913e-15	410.08	1191.78	876.434	2209.31	827.46	1504.75	2087.48	2185.04	1013.81	1924.61	666.501	549.575	411.9	808.179	1169.94	541.687	540.575	949.644	1270.22	896.045	1662.58	2743.98	399.176	2578.89	2486.59	1741.47	2233.66	690.129	785.956	980.418	632.923	2544.95	2134.52	3827.69	832.807	1857.75	650.427
ENSSSCG00000039523		fumarylacetoacetate hydrolase domain-containing protein 2	1620.28	-1.47033	0.170686	-8.61421	7.04225e-18	2.90962e-15	742.752	1879.06	967.792	3343.55	709.652	1876.24	2053.47	2572.12	1053.17	1672.01	772.553	716.837	1068.95	893.372	1770.58	595.586	742.944	1098.4	3226.7	748.484	2302.55	2271.12	443.464	2493.3	1741.8	1702.87	1550.07	873.339	991.513	861.392	667.95	2532.63	2675.33	5907.29	695.86	2917.66	818.007
ENSSSCG00000010545	CPN1	carboxypeptidase N subunit 1	1773.28	-1.46719	0.226532	-6.47674	9.37259e-11	5.4578e-09	621.11	1071	1073.2	2280.52	1429.82	1736.74	1817.24	2462.13	1610.45	2266.43	1309.34	398.243	557.495	501.946	1464.17	940.54	352.067	2772.54	2154.43	797.995	4070.81	4113.52	2380.89	3653.73	4769.47	1800.71	2335.08	889.075	769.833	904.594	1010.07	2019.95	2174.97	3245.63	882.859	2126.28	846.32
ENSSSCG00000028725	TMEM102	transmembrane protein 102	49.5128	-1.46491	0.293327	-4.99413	5.91017e-07	1.0584e-05	31.332	51.3054	4.01573	81.2321	33.6594	61.1306	88.2423	64.5146	24.4008	71.8399	20.3948	18.2054	24.8882	24.1763	31.3377	23.3563	40.1966	32.164	138.57	72.8097	69.4778	48.0712	18.3054	110.052	52.8145	55.6551	54.3043	13.4879	22.8397	28.2135	26.0663	73.1307	28.7441	175.388	26.4163	77.4601	13.7737
ENSSSCG00000015732	TFCP2L1	transcription factor CP2 like 1	151.807	-1.46472	0.363012	-4.03491	5.46224e-05	0.000474168	46.9979	292.868	228.897	377.077	119.912	269.601	198.545	89.8974	29.9107	303.581	24.4737	65.9945	265.059	66.7726	97.4952	64.679	4.15827	78.8019	89.0806	5.82478	119.384	353.176	18.8959	311.815	375.091	336.624	198.85	30.3477	29.5573	42.3202	49.6889	374.891	234.211	179.242	11.1226	222.052	9.9477
ENSSSCG00000008563	KCNK3	potassium two pore domain channel subfamily K member 3	7.38036	-1.46465	0.576121	-2.54225	0.011014	0.0369612	4.60764	13.8952	0	9.02579	9.11608	10.1884	8.27271	6.3457	7.08411	2.31741	3.26316	0	0	1.15125	0	2.69496	0	4.02051	1.09976	8.73717	21.5283	18.6398	25.3914	9.78242	24.7905	9.87429	11.9789	1.12399	1.34351	4.40835	10.5894	7.69797	5.32299	0	7.64681	18.074	3.06083
ENSSSCG00000000132	TEX33	testis expressed 33	35.2715	-1.46334	0.559917	-2.61349	0.00896228	0.0314187	5.52917	5.34431	6.0236	5.01433	0.701237	3.91863	0	94.1279	14.9553	13.9045	17.9474	21.6189	6.22205	4.60501	31.3377	0	4.15827	5.62871	71.4845	6.79557	15.657	153.043	5.31448	8.55962	261.917	5.38598	3.19437	8.99191	0	3.52668	0	35.4107	12.7752	248.626	9.7323	197.523	16.0694
ENSSSCG00000029709		spermatogenesis associated 22	4.81119	-1.46146	0.490632	-2.97872	0.00289451	0.0125414	2.76458	10.6886	5.01967	9.02579	4.90866	7.05353	17.4646	5.28808	3.93562	13.9045	4.07895	0	7.46646	0	3.48197	0	0	3.2164	2.19952	1.94159	6.84993	9.81044	0	3.66841	11.8563	1.79533	5.59015	5.61994	1.34351	0	0.814573	6.92818	6.38759	11.564	0	2.582	0.765208
ENSSSCG00000010185	GALNT2	polypeptide N-acetylgalactosaminyltransferase 2	1447.34	-1.45975	0.157184	-9.28686	1.5891e-20	1.02132e-17	669.029	1945.33	1076.22	2753.87	1162.65	2670.94	2719.88	769.945	844.583	811.095	969.975	580.297	568.695	1171.97	1206.5	998.931	889.869	2031.16	1222.93	1200.88	2728.23	1442.14	1022.15	2774.54	1088.62	3082.57	3051.42	862.099	804.765	670.07	916.394	2437.95	2492.22	1106.29	1029.54	728.125	1049.87
ENSSSCG00000009988	THOC5	THO complex 5	288.877	-1.45945	0.301151	-4.84624	1.25824e-06	2.02357e-05	45.1549	58.7874	99.3894	187.536	147.961	108.938	258.292	766.772	360.502	1035.88	191.711	86.4756	33.5991	72.5289	113.164	63.7807	48.5131	100.513	711.545	185.422	186.905	571.949	89.7556	243.338	642.396	136.445	101.421	37.0916	71.2062	104.037	82.2718	170.125	155.431	1717.26	256.516	1165.77	280.066
ENSSSCG00000014908	CCDC89	coiled-coil domain containing 89	6.28509	-1.45827	0.484346	-3.0108	0.00260558	0.0115668	5.52917	0	3.0118	2.00573	3.50619	2.35118	7.35352	15.8642	17.3167	8.11095	12.2369	0	0	0	6.96394	0.898319	1.38609	4.02051	19.7957	2.91239	7.82849	12.7536	8.85746	7.33682	10.7785	6.28364	5.59015	3.37196	4.03054	0.88167	4.07286	8.46777	1.0646	15.4187	9.7323	5.164	7.65208
ENSSSCG00000031595		serpin A3-8	57058.3	-1.45796	0.383296	-3.80375	0.000142521	0.00106419	16092.6	48843.8	23243.1	84708	22143	67446.6	50079.3	1689.01	210.162	431.039	989.554	30763.7	40326.3	31658.3	44999.2	50218.7	27185.4	104363	94764.2	928.081	166870	31081.4	540.896	254134	831.02	76076.9	86699.2	164172	79980.7	68452	67761	164881	183805	18968.8	2044.48	1940.37	1834.2
ENSSSCG00000039074	TNFRSF13C	TNF receptor superfamily member 13C	106.852	-1.45794	0.232128	-6.28075	3.36942e-10	1.6997e-08	42.3903	154.985	47.1849	110.315	77.1361	179.473	147.07	154.412	94.4548	104.284	45.6843	18.2054	44.7987	43.7476	36.5607	44.0176	60.9879	129.46	202.356	52.423	140.913	147.157	48.4208	112.498	212.336	200.179	168.503	67.4393	42.9924	116.381	100.192	240.947	157.56	200.443	29.8921	143.301	34.4343
ENSSSCG00000017951	ATP1B2	ATPase Na+/K+ transporting subunit beta 2	33.9837	-1.45776	0.268944	-5.42031	5.94965e-08	1.5204e-06	7.37223	35.2724	22.0865	17.0487	18.2322	18.0257	45.9595	64.5146	105.475	72.9986	53.0264	5.68918	7.46646	11.5125	13.9279	6.28823	4.15827	23.3189	30.7933	42.715	29.3568	68.6731	30.1154	64.8086	94.8505	16.1579	36.7353	6.74393	13.4351	9.69838	16.2915	29.2523	23.4211	79.0208	43.1002	47.767	42.0864
ENSSSCG00000012993	SLC25A45	solute carrier family 25 member 45	158.829	-1.45622	0.435482	-3.34394	0.000825988	0.00461325	102.29	6.41317	37.1455	72.2063	99.5757	61.9143	92.8382	276.038	312.488	291.994	107.684	9.1027	14.9329	49.5038	20.8918	23.3563	36.0383	73.9773	267.242	196.101	231.919	503.276	73.8122	305.701	478.564	83.4827	58.2973	16.8598	2.68703	62.5986	13.8477	102.383	40.4547	732.388	194.646	644.21	179.824
ENSSSCG00000040904	CLDN1	claudin 1	1588.07	-1.45274	0.283638	-5.1218	3.02639e-07	6.04984e-06	759.339	1079.55	523.049	1362.89	2600.89	2868.43	2695.99	3255.34	2402.3	1972.12	899.001	653.118	389.5	394.88	804.335	752.792	189.894	2605.29	2093.94	315.509	2458.15	3682.84	471.217	2904.16	3626.95	1771.99	1796.83	890.199	596.52	1130.3	695.645	2528.78	1413.79	2042.98	725.752	2650.43	753.73
ENSSSCG00000024379	PCSK4	proprotein convertase subtilisin/kexin type 4	18.4332	-1.45216	0.417058	-3.48191	0.000497843	0.00299967	5.52917	2.13772	23.0905	38.1089	9.81732	23.5118	22.0606	26.4404	6.29699	35.9199	25.2895	4.55135	6.22205	8.05877	8.70493	2.69496	5.54436	16.8861	31.8931	13.5911	17.6141	37.2797	6.49547	23.2333	44.1917	16.1579	19.1662	3.37196	0	1.76334	4.88744	10.0074	0	80.9481	11.8178	82.6241	6.12166
ENSSSCG00000048855		-	58.0158	-1.44894	0.379834	-3.81466	0.000136371	0.00102488	21.1951	44.8922	12.0472	33.0946	56.099	85.426	50.5555	24.3252	18.1038	17.3806	13.0526	26.1703	21.155	4.60501	64.4165	31.4412	22.1774	316.012	14.2969	11.6496	184.948	88.294	14.1719	130.84	117.485	128.366	108.609	132.631	32.2443	44.0835	26.0663	68.512	57.4883	28.91	14.5985	52.931	28.3127
ENSSSCG00000011119	ECHDC3	enoyl-CoA hydratase domain containing 3	1419.5	-1.44665	0.205989	-7.02294	2.17253e-12	2.10705e-10	363.082	921.359	450.766	1784.1	452.298	1107.4	1289.62	1058.67	824.905	2242.1	567.79	541.61	344.701	1168.52	900.089	589.297	755.419	1386.27	1602.35	713.535	2705.72	2818.54	325.364	2822.23	3501.92	1594.25	1720.17	1510.64	953.895	715.916	487.114	1879.08	2645.52	4099.44	1040.66	3607.06	1029.97
ENSSSCG00000015453	PDIA4	protein disulfide isomerase family A member 4	17217.5	-1.44664	0.22997	-6.29056	3.16332e-10	1.60977e-08	7857.87	34138.4	9198.04	24745.7	10449.8	22704.5	34101	8254.7	5022.63	6102.91	2897.69	6792.89	8230.52	9071.87	22006.1	24179.2	22227.3	10725.1	40881.4	4555.95	70060.1	19589.5	3434.33	43370.4	8215.34	29697.4	23092.9	8737.88	12450.3	10076.6	9302.42	25064.6	32422.3	13859.5	3970.78	5468.68	4090.04
ENSSSCG00000035664	ZBTB45	zinc finger and BTB domain containing 45	194.03	-1.44609	0.247317	-5.84712	5.0016e-09	1.81956e-07	86.6237	147.503	95.3737	332.951	102.381	194.364	207.737	219.984	158.999	422.928	133.79	77.3729	52.2652	156.57	186.285	69.1706	113.659	68.3486	379.417	268.911	174.184	246.242	102.747	355.836	265.15	205.565	129.372	85.4231	47.023	52.0186	79.8281	387.978	224.63	759.37	142.509	335.66	110.955
ENSSSCG00000006289	F5	coagulation factor V	1456.43	-1.44198	0.22722	-6.34619	2.20718e-10	1.17005e-08	682.852	2006.25	712.793	1367.91	936.152	1431.08	1524.02	2987.77	1296.39	3036.97	659.974	787.383	771.534	556.055	1018.48	521.923	243.952	2037.59	2412.88	199.013	2897.52	3398.34	543.848	1875.78	4918.21	1648.11	1210.67	664.277	741.62	947.796	223.193	1828.27	1892.85	2241.49	404.586	2802.76	457.594
ENSSSCG00000001848	MESP2	mesoderm posterior bHLH transcription factor 2	15.3954	-1.44032	0.407747	-3.53238	0.000411844	0.00257169	19.3521	8.55089	0	7.02006	18.2322	26.6467	24.8181	11.6338	36.9948	6.95224	17.1316	1.13784	4.97764	3.45376	0	6.28823	5.54436	10.4533	21.9952	15.5327	18.5927	17.6588	14.7624	51.3577	21.5569	20.6462	19.9648	4.49595	9.4046	7.93503	8.14573	31.5617	7.45218	19.2734	19.4646	32.275	18.365
ENSSSCG00000009322	SLC46A3	solute carrier family 46 member 3	131.913	-1.44027	0.288511	-4.99208	5.97333e-07	1.06532e-05	33.175	42.7545	49.1927	153.438	79.2398	108.938	152.586	156.527	84.2222	414.817	110.132	19.3432	26.1326	23.025	50.4886	49.4076	55.4436	61.9158	300.235	129.116	140.913	205.038	50.1923	90.4874	233.893	71.813	35.9367	33.7196	36.2749	74.0603	64.3512	153.19	96.8784	375.831	171.01	797.839	149.216
ENSSSCG00000008902	PPAT	phosphoribosyl pyrophosphate amidotransferase	616.369	-1.44018	0.219665	-6.55624	5.51831e-11	3.4078e-09	223.01	1212.09	233.916	1093.12	440.377	1023.55	932.978	710.718	331.379	520.26	186.816	386.865	357.146	533.03	649.387	426.702	194.052	1161.12	1059.07	100.963	1196.78	1192.95	121.052	1375.65	663.953	976.657	961.506	826.131	298.26	293.596	267.994	818.295	1065.66	308.374	172.401	304.676	185.18
ENSSSCG00000002627	GSTA4	glutathione S-transferase alpha 4	881.392	-1.43873	0.241828	-5.94942	2.69094e-09	1.05886e-07	190.756	234.081	356.396	468.338	464.92	540.77	983.534	2450.5	647.803	2164.47	691.79	262.84	153.062	218.738	372.571	159.003	88.7097	280.631	1371.4	372.786	818.077	2767.53	328.907	990.47	3340.25	529.621	523.078	255.145	216.306	306.821	345.379	766.718	480.133	4610.19	574.206	2674.95	610.636
ENSSSCG00000017952	SAT2	spermidine/spermine N1-acetyltransferase family member 2	187.478	-1.4374	0.215601	-6.66696	2.61153e-11	1.83473e-09	72.8007	180.638	132.519	366.046	107.991	244.522	244.505	274.98	157.425	369.628	100.342	46.6513	58.4872	110.52	165.394	62.8823	155.242	68.3486	355.223	122.32	191.798	349.252	70.2692	240.892	273.773	177.737	194.857	74.1832	55.0841	119.026	71.6824	443.403	231.018	499.18	88.9811	375.681	83.4076
ENSSSCG00000039715	FAHD1	fumarylacetoacetate hydrolase domain containing 1	22.5801	-1.43512	0.296354	-4.8426	1.28153e-06	2.05341e-05	9.21528	20.3084	11.0433	33.0946	18.9334	30.5653	34.01	31.7285	12.594	27.809	4.89474	0	12.4441	3.45376	17.4099	19.763	13.8609	13.6697	63.7861	19.4159	24.464	28.4503	10.0385	45.2437	25.8683	22.4416	18.3676	6.74393	10.7481	18.5151	8.9603	35.4107	23.4211	69.3841	13.9033	63.2591	12.2433
ENSSSCG00000045465		-	9.28779	-1.43386	0.382978	-3.74397	0.000181134	0.00130424	3.68611	6.41317	6.0236	8.02292	6.31114	8.62098	17.4646	30.6709	10.2326	19.698	9.78948	6.82702	0	2.3025	0	0.898319	0	4.02051	17.5962	2.91239	5.87137	19.6209	1.77149	18.342	22.6348	5.38598	11.1803	2.24798	4.03054	8.8167	2.44372	12.3168	5.32299	26.9827	7.64681	20.656	6.88687
ENSSSCG00000011444	NT5DC2	5'-nucleotidase domain containing 2	10.8591	-1.43066	0.393877	-3.63225	0.000280961	0.00187016	7.37223	8.55089	7.02753	16.0458	15.4272	23.5118	24.8181	9.51855	6.29699	9.26966	10.6053	5.68918	0	4.60501	1.74099	8.08487	8.31653	16.082	2.19952	2.91239	41.0996	25.5072	4.72398	25.6789	19.4012	14.3626	16.7704	3.37196	1.34351	1.76334	8.14573	17.7053	10.646	1.92734	3.47582	15.492	2.29562
ENSSSCG00000012589	RTL4	retrotransposon Gag like 4	16.374	-1.43024	0.412825	-3.46452	0.000531172	0.00317366	7.37223	18.1706	2.00787	14.0401	26.647	14.8908	13.7879	33.8437	20.4652	13.9045	8.1579	10.2405	0	4.60501	5.22296	3.59328	4.15827	60.3076	16.4964	18.4451	30.3354	49.0522	6.49547	29.3473	25.8683	9.87429	12.7775	3.37196	1.34351	7.05336	6.51658	6.92818	8.51678	32.7647	18.0743	37.439	23.7214
ENSSSCG00000010376	GDF10	growth differentiation factor 10	27.4347	-1.42838	0.413865	-3.45132	0.000557855	0.00329492	21.1951	42.7545	8.03147	33.0946	38.568	51.7259	48.7171	20.0947	29.1236	38.2373	18.7632	2.27567	3.73323	11.5125	1.74099	16.1697	1.38609	69.1527	14.2969	10.6788	91.0062	62.7868	53.1448	30.5701	52.8145	33.2135	37.5339	8.99191	4.03054	20.2784	20.3643	27.7127	21.292	26.9827	11.1226	29.693	2.29562
ENSSSCG00000022247		proline and serine rich 2	183.36	-1.42495	0.223786	-6.36747	1.9217e-10	1.0421e-08	60.8209	130.401	79.3107	173.496	173.206	394.214	215.091	222.099	221.969	319.803	79.1316	38.6865	67.1981	81.7389	147.984	138.341	63.7601	203.438	222.152	77.6637	332.711	317.858	60.2308	267.794	414.971	263.913	160.517	118.019	85.9849	114.617	107.524	274.818	413.064	346.921	78.5536	233.671	82.6424
ENSSSCG00000000487	SLC35E3	solute carrier family 35 member E3	136.704	-1.42397	0.278032	-5.12159	3.02963e-07	6.04984e-06	29.4889	64.1317	43.1691	148.424	201.255	219.443	157.182	208.35	156.638	183.076	94.6317	37.5486	27.377	44.8988	81.8263	62.8823	79.0071	158.408	257.344	98.0504	228.983	316.877	100.975	315.483	367.546	181.328	135.761	21.3558	26.8703	65.2436	92.0467	119.319	155.431	181.17	123.739	200.105	72.6947
ENSSSCG00000003428	MTHFR	methylenetetrahydrofolate reductase	287.095	-1.42268	0.191541	-7.42754	1.10639e-13	1.4883e-11	82.9375	223.392	123.484	345.988	123.418	360.514	389.737	226.33	336.102	378.897	214.553	97.854	85.8643	231.402	233.292	192.24	148.312	295.909	195.757	237.845	365.982	440.489	126.957	628.521	635.929	393.176	285.896	107.903	145.1	191.322	147.438	563.492	433.291	566.637	259.296	544.802	262.466
ENSSSCG00000010222	ZNF365	zinc finger protein 365	4.87502	-1.41978	0.502221	-2.82699	0.00469872	0.0186242	6.4507	1.06886	1.00393	6.01719	2.80495	2.35118	10.1111	8.46093	19.6781	9.26966	11.4211	1.13784	0	1.15125	1.74099	0.898319	1.38609	1.6082	8.79809	5.82478	1.95712	4.90522	8.85746	3.66841	8.62277	2.69299	7.18733	0	0	0.88167	1.62915	3.07919	2.1292	5.78201	6.95165	15.492	5.35645
ENSSSCG00000028699	NEIL2	nei like DNA glycosylase 2	47.0111	-1.41526	0.326166	-4.33908	1.43078e-05	0.000153167	26.7243	38.479	23.0905	56.1604	75.0324	82.2911	60.6666	57.1113	88.1578	49.8244	40.7895	17.0676	7.46646	12.6638	10.4459	12.5765	8.31653	47.442	85.7813	42.715	90.0276	69.6541	23.0294	145.514	102.395	58.3481	71.0747	31.4717	5.37406	44.9652	21.1789	42.3389	41.5193	44.3287	25.7211	49.058	30.6083
ENSSSCG00000023014		CD300 molecule like family member g	13.0322	-1.41515	0.444385	-3.18451	0.00144998	0.00726686	6.4507	10.6886	6.0236	9.02579	12.6223	21.1606	16.5454	13.749	9.44548	27.809	14.6842	1.13784	4.97764	2.3025	1.74099	6.28823	2.77218	3.2164	26.3943	39.8026	8.80705	15.6967	8.26697	17.1192	17.2455	9.87429	11.1803	0	0	1.76334	4.07286	3.07919	5.32299	28.91	40.3195	19.365	54.3297
ENSSSCG00000032580	MGST1	microsomal glutathione S-transferase 1	5748.56	-1.41507	0.219025	-6.46076	1.0418e-10	6.00609e-09	2266.96	7292.84	2202.63	8667.76	3168.89	5569.93	6113.54	11554.5	3520.02	8901.19	1864.08	2904.9	3911.18	2254.15	4201	3323.78	1176.79	6452.91	19107.2	1003.8	8100.53	14214.4	1529.39	6665.5	12934.2	6403.93	4960.86	2156.93	3644.95	5124.27	2436.39	9426.17	6404.62	11197.8	1498.77	9057.66	1482.21
ENSSSCG00000003812	PGM1	phosphoglucomutase 1	136.25	-1.4138	0.376876	-3.75135	0.000175882	0.00127276	39.6257	103.68	39.1534	130.372	127.625	189.661	133.283	57.1113	33.8463	71.8399	25.2895	40.9621	14.9329	31.0838	85.3083	97.0185	47.127	503.367	75.8835	10.6788	410.996	430.678	33.0679	449.991	324.432	212.746	346.589	165.226	38.9619	168.399	131.961	137.794	163.948	55.8928	18.0743	63.2591	31.3735
ENSSSCG00000035347	CYP2C42	cytochrome P450 C42	386.84	-1.41316	0.335419	-4.21314	2.51846e-05	0.000247749	153.895	83.3712	119.468	134.384	185.127	364.432	284.949	811.192	160.573	1796	314.895	117.197	164.262	49.5038	200.213	70.0689	42.9688	227.561	1079.97	229.108	531.359	842.717	288.753	202.985	1566.11	368.939	144.545	161.854	122.26	377.355	106.709	625.845	432.227	395.104	115.397	1315.53	126.259
ENSSSCG00000035152	TEF	TEF transcription factor, PAR bZIP family member	372.684	-1.41272	0.253074	-5.58223	2.3746e-08	6.8907e-07	63.5854	180.638	306.2	307.88	118.509	268.034	268.404	294.017	286.513	1166.82	230.869	93.3026	98.3084	188.805	301.19	196.732	241.179	354.609	542.182	231.05	418.824	525.84	121.052	841.288	633.774	432.674	434.434	128.135	85.9849	317.401	152.325	792.121	504.619	1000.29	313.519	1023.76	324.448
ENSSSCG00000003828	FGGY	FGGY carbohydrate kinase domain containing	76.1248	-1.41243	0.25273	-5.58871	2.28759e-08	6.65767e-07	18.4306	56.6497	25.0983	84.2407	74.3311	83.0749	117.656	96.2431	36.2077	171.489	21.2105	30.7216	31.1102	11.5125	88.7902	40.4244	29.1079	82.0183	192.458	22.3283	196.691	155.005	21.8484	162.633	145.509	83.4827	45.5198	78.6792	52.397	51.1369	55.3909	93.9153	114.977	107.931	15.9888	103.28	19.1302
ENSSSCG00000012774	DUSP9	dual specificity phosphatase 9	1140.34	-1.41206	0.312802	-4.51422	6.35502e-06	7.77706e-05	243.283	627.422	755.962	2781.95	312.051	1203.8	1824.59	2077.16	1180.69	1849.3	453.579	541.61	359.634	1469	889.643	694.401	135.837	523.47	533.384	379.581	1281.92	1626.57	236.199	3075.35	1615.69	2216.33	1675.45	992.482	927.025	424.084	328.273	2207.78	1454.24	2611.54	615.916	1540.16	527.228
ENSSSCG00000016867	CCDC152	coiled-coil domain containing 152	56.4459	-1.40756	0.365042	-3.85587	0.000115317	0.000892152	12.9014	6.41317	21.0826	22.063	17.5309	23.5118	57.909	230.56	120.43	215.52	66.8948	11.3784	6.22205	11.5125	26.1148	19.763	1.38609	5.62871	134.171	70.8681	23.4855	104.972	70.8597	20.7876	176.767	15.2603	16.7704	11.2399	2.68703	13.2251	13.0332	38.4899	24.4857	210.08	53.5277	170.412	40.556
ENSSSCG00000045349		-	5.82795	-1.40603	0.522618	-2.69037	0.00713737	0.0260967	0	2.13772	4.01573	10.0287	2.10371	7.05353	15.6262	4.23047	0	4.63483	4.89474	3.41351	1.24441	2.3025	17.4099	7.18655	0	14.4738	2.19952	1.94159	2.93568	18.6398	1.181	0	7.54492	8.97663	7.98593	0	10.7481	6.17169	4.07286	4.61878	10.646	1.92734	6.25648	12.91	6.12166
ENSSSCG00000004017		FERM domain containing 1	48.8267	-1.40566	0.36624	-3.83807	0.000124003	0.000950167	9.21528	9.61975	2.00787	17.0487	4.20742	17.242	20.2222	71.9179	87.3707	375.421	77.5001	5.68918	2.48882	6.90751	3.48197	19.763	5.54436	4.02051	47.2897	54.3646	8.80705	78.4835	28.3439	20.7876	167.066	26.0322	20.7634	7.86792	2.68703	14.1067	10.5894	30.0221	30.8733	200.443	56.3083	220.761	41.3212
ENSSSCG00000004569	LACTB	lactamase beta	637.065	-1.4055	0.168189	-8.35668	6.45087e-17	2.11211e-14	342.808	1180.02	477.872	1218.48	286.105	1162.26	858.524	662.068	364.438	680.161	120.737	486.994	583.628	412.148	668.538	318.903	274.446	929.541	1017.28	110.671	1072.5	1064.43	104.518	995.362	952.816	1229.8	858.487	372.04	373.497	356.195	240.299	1081.57	1033.72	778.644	117.483	680.358	104.068
ENSSSCG00000003353	SLC35E2B	solute carrier family 35 member E2B	741.293	-1.40391	0.18945	-7.41043	1.25893e-13	1.68048e-11	244.205	390.135	560.195	1207.45	401.108	897.365	885.18	622.936	473.848	1286.17	437.264	233.257	270.037	404.09	449.174	459.041	257.813	1018.8	974.388	380.552	1151.77	1802.18	336.584	1672.79	1346.23	1052.06	852.098	440.603	276.764	407.332	483.856	1188.57	841.032	1314.44	385.816	1640.86	381.839
ENSSSCG00000036438	GPX3	glutathione peroxidase 3	453.497	-1.40365	0.220289	-6.37186	1.86745e-10	1.01586e-08	110.583	150.709	109.429	304.871	126.924	199.066	307.01	1051.27	39.3562	1191.15	83.2106	95.5783	179.195	88.6464	363.866	73.6622	169.103	216.303	754.436	184.451	431.545	929.049	63.1832	397.411	1511.14	342.01	240.376	201.194	150.474	151.647	133.59	401.834	293.829	3841.18	84.8101	1713.16	94.1206
ENSSSCG00000015699	ACMSD	aminocarboxymuconate semialdehyde decarboxylase	35.5723	-1.40262	0.356966	-3.92928	8.51997e-05	0.00068766	10.1368	5.34431	18.0708	36.1031	17.5309	25.8629	54.2322	16.9219	13.3811	42.8722	17.9474	13.654	12.4441	18.42	12.1869	47.6109	13.8609	18.4943	111.076	2.91239	99.8132	96.1423	12.4005	92.933	99.1619	43.0878	24.7564	8.99191	13.4351	9.69838	13.8477	43.1086	29.8087	132.986	13.2081	64.5501	9.18249
ENSSSCG00000008307	SFXN5	sideroflexin 5	198.587	-1.39958	0.222764	-6.28281	3.32505e-10	1.68221e-08	44.2334	145.365	177.696	261.748	77.1361	174.771	227.04	298.248	110.984	373.104	99.5264	77.3729	58.4872	135.848	188.026	114.087	91.4819	99.7085	515.788	69.8973	306.29	387.513	50.1923	374.178	397.725	195.691	158.121	68.5633	69.8627	85.522	118.928	264.04	277.86	607.111	72.9923	502.199	70.3991
ENSSSCG00000005650	CERCAM	cerebral endothelial cell adhesion molecule	139.156	-1.39872	0.191109	-7.31895	2.49925e-13	3.14272e-11	63.5854	194.533	104.409	210.602	94.667	228.064	214.171	149.124	166.87	181.917	124	54.6162	53.5096	64.4701	81.8263	77.2555	26.3357	145.542	91.2801	98.0504	221.155	164.815	66.1357	275.131	139.042	219.03	279.507	141.623	56.4276	130.487	91.2321	216.313	191.628	144.55	125.825	156.211	104.833
ENSSSCG00000001484	TINAG	tubulointerstitial nephritis antigen	12.7575	-1.39786	0.580711	-2.40716	0.0160773	0.0499265	9.21528	1.06886	0	0	0	13.3233	3.67676	23.2676	5.50986	10.4284	15.5	4.55135	4.97764	0	1.74099	1.79664	1.38609	24.9271	19.7957	14.5619	44.0353	15.6967	25.3914	13.4508	50.6588	15.2603	14.3747	11.2399	8.06108	15.8701	0.814573	9.23757	12.7752	38.5467	1.39033	38.73	0.765208
ENSSSCG00000005905	SLC39A4	solute carrier family 39 member 4	21.4623	-1.39761	0.471255	-2.96573	0.0030197	0.0129604	18.4306	47.0299	24.0944	18.0516	37.1656	141.071	52.3939	43.3623	3.93562	1.15871	14.6842	6.82702	2.48882	3.45376	1.74099	6.28823	15.247	18.4943	31.8931	6.79557	3.91424	29.4313	2.95249	96.6014	12.9342	14.3626	52.7071	5.61994	12.0916	12.3434	12.2186	8.46777	18.0982	3.85467	4.86615	9.03701	0
ENSSSCG00000001887	SCAMP5	secretory carrier membrane protein 5	569.263	-1.39204	0.187997	-7.40457	1.31575e-13	1.74292e-11	199.05	417.925	381.495	733.094	474.036	812.723	686.635	744.562	502.972	523.736	423.395	139.954	180.439	192.259	473.548	300.937	178.805	737.361	696.149	465.011	852.327	768.158	318.278	859.63	792.217	1265.7	749.879	448.471	423.207	543.991	462.677	1198.57	633.436	1056.18	418.489	579.659	427.751
ENSSSCG00000023215	MAOB	monoamine oxidase B	2740.7	-1.39122	0.273605	-5.08477	3.68064e-07	7.08881e-06	349.259	711.862	1168.58	2285.53	1651.41	1508.67	2439.53	6670.39	2159.87	6606.95	2261.37	809.002	372.078	992.379	1356.23	974.676	785.912	806.513	4634.39	3525.93	3332.98	7919.97	1134.94	3090.02	10242.8	1616.69	1809.61	200.07	644.887	357.958	770.586	1594.25	1581.99	12290.6	2202.28	8506.41	2039.28
ENSSSCG00000033766		electron transfer flavoprotein subunit beta lysine methyltransferase	67.3336	-1.39062	0.229831	-6.05062	1.44289e-09	6.12189e-08	35.9396	33.1347	22.0865	138.395	32.9581	119.91	97.4342	113.165	51.163	100.808	57.1053	21.6189	26.1326	35.6888	50.4886	35.9328	34.6522	42.6174	144.069	60.1894	91.0062	75.5404	20.6674	117.389	112.096	66.4271	46.3184	32.5957	37.6184	37.9118	31.7683	57.7348	69.1988	237.062	47.9664	121.354	35.1996
ENSSSCG00000024990	MPI	mannose phosphate isomerase	78.7774	-1.3894	0.343115	-4.04938	5.13534e-05	0.000450979	31.332	88.7155	21.0826	147.421	50.4891	116.775	111.222	34.9013	20.4652	45.1896	18.7632	22.7567	19.9106	48.3526	50.4886	70.0689	13.8609	81.2142	36.2921	9.70796	173.205	134.403	19.4864	248.229	112.096	201.077	135.761	176.466	61.8016	95.2204	75.7553	196.298	176.723	30.8374	9.03714	23.238	6.12166
ENSSSCG00000032022	GCHFR	GTP cyclohydrolase I feedback regulator	205.646	-1.38853	0.375856	-3.69431	0.000220484	0.00153719	63.5854	126.126	93.3658	170.487	98.8744	112.856	264.727	223.157	116.494	236.376	48.9474	98.9918	74.6646	80.5877	299.449	120.375	298.009	53.0707	1117.36	194.159	268.126	258.996	69.0882	294.695	171.378	98.7429	74.2691	37.0916	51.0535	53.7819	36.6558	169.355	185.24	1252.77	96.6279	481.543	117.842
ENSSSCG00000050692		-	69.9549	-1.38818	0.424521	-3.27001	0.00107545	0.00569668	32.2535	84.4401	35.1377	64.1834	43.4767	101.884	48.7171	38.0742	40.1433	133.251	34.2632	37.5486	17.4217	43.7476	13.9279	23.3563	8.31653	531.511	26.3943	12.6204	156.57	147.157	15.3529	116.166	205.869	52.0645	102.22	48.3315	22.8397	52.0186	70.0533	31.5617	50.0361	5.78201	20.8549	95.5341	25.2519
ENSSSCG00000013377	USH1C	USH1 protein network component harmonin	100.256	-1.38471	0.374496	-3.69754	0.000217697	0.00152204	23.0382	17.1018	58.2281	138.395	84.8497	75.2376	120.414	80.3789	148.766	181.917	39.9737	2.27567	8.71087	59.8651	15.6689	40.4244	24.9496	57.0912	60.4868	177.656	135.041	184.436	86.8032	172.415	244.671	172.351	171.697	44.9595	17.4657	37.0302	88.7884	152.42	58.5529	271.754	129.301	200.105	126.259
ENSSSCG00000004511		myosin VB	180.813	-1.3829	0.295494	-4.67995	2.86948e-06	4.02042e-05	77.4084	312.108	68.2675	178.51	179.517	288.411	180.161	158.642	98.3904	117.029	91.3685	58.0297	58.4872	52.9576	118.387	107.798	47.127	375.515	273.84	37.8611	522.552	333.555	119.871	505.018	321.198	165.17	249.161	352.932	59.1146	111.972	168.617	228.63	248.051	183.097	75.0778	101.989	64.2775
ENSSSCG00000015512	PAPPA2	pappalysin 2	181.86	-1.38263	0.326901	-4.2295	2.34211e-05	0.000232111	23.9597	203.084	67.2635	183.524	249.64	501.584	510.151	79.3212	81.0737	132.093	30.1842	142.23	115.73	96.7052	120.128	104.205	295.237	540.356	106.677	29.1239	291.611	238.394	10.629	793.599	194.012	207.36	422.456	58.4474	76.5803	66.1253	101.007	117.779	237.405	134.914	27.8066	99.4071	39.0256
ENSSSCG00000022282	BDH2	3-hydroxybutyrate dehydrogenase 2	275.033	-1.38131	0.24773	-5.57588	2.46287e-08	7.12302e-07	96.7605	119.713	79.3107	400.143	310.648	394.997	310.686	383.915	306.978	711.446	181.105	121.749	89.5975	74.8314	182.803	162.596	74.8488	139.914	646.659	330.071	309.225	367.892	164.158	314.26	491.498	194.793	255.55	70.8113	83.2979	101.392	145.809	367.193	309.798	792.135	168.925	750.072	170.641
ENSSSCG00000010780	CYP2E1	cytochrome P450, family 2, subfamily E, polypeptide 1	1011.74	-1.38107	0.315887	-4.37206	1.23081e-05	0.000134788	861.629	1076.34	923.619	2418.91	445.987	2361.36	2456.08	466.409	360.502	2667.34	531.079	439.205	532.607	305.082	297.708	344.955	510.081	495.326	643.36	558.208	3189.13	2646.86	694.425	462.219	626.229	1316.87	275.514	375.412	689.223	553.689	437.426	1762.07	1668.22	1757.73	412.233	1520.8	350.465
ENSSSCG00000017089	ANXA6	annexin A6	1395.1	-1.38087	0.272274	-5.07161	3.94471e-07	7.5427e-06	550.152	1655.67	635.49	2057.88	1276.95	2335.5	2075.53	994.159	920.934	1232.86	622.448	502.924	577.406	472.013	477.03	1029.47	386.719	1162.73	1248.23	591.215	4362.43	2994.15	542.077	3346.81	3130.07	2385.99	2271.2	1237.51	605.925	1225.52	1255.26	2133.88	2203.72	1534.16	337.155	930.812	316.796
ENSSSCG00000017337	ACBD4	acyl-CoA binding domain containing 4	64.8741	-1.37974	0.255432	-5.40158	6.6056e-08	1.65407e-06	29.4889	41.6856	44.1731	79.2263	34.3606	82.2911	65.2625	90.955	73.9896	122.823	86.4738	26.1703	7.46646	50.6551	29.5967	21.5597	15.247	60.3076	71.4845	83.4885	52.8423	104.972	17.7149	116.166	113.174	43.9855	58.2973	20.2318	8.06108	25.5684	31.7683	113.16	54.2945	175.388	81.3343	200.105	66.5731
ENSSSCG00000003083	CBLC	Cbl proto-oncogene C	25.4635	-1.3793	0.238851	-5.77472	7.70815e-09	2.61275e-07	18.4306	27.7904	20.0787	43.1232	17.5309	36.8351	31.2525	28.5556	18.1038	40.5548	18.7632	9.1027	16.1773	5.75626	10.4459	8.08487	8.31653	28.9476	57.1876	13.5911	45.0138	36.2986	12.4005	40.3525	25.8683	63.7341	30.3465	10.1159	16.1222	13.2251	35.0266	46.9576	26.6149	28.91	11.1226	28.402	13.0085
ENSSSCG00000012848	EPS8L2	EPS8 like 2	916.398	-1.37839	0.239139	-5.76399	8.21481e-09	2.75728e-07	267.243	841.194	995.902	1111.17	312.051	1048.62	1441.29	754.081	547.838	1505.16	443.79	120.611	256.348	1023.46	1131.64	465.329	482.359	834.657	1026.08	692.178	1615.6	1176.27	245.057	1343.86	1254.61	1753.14	1224.24	418.124	319.756	640.974	607.671	1715.11	1166.8	2316.66	523.459	1806.11	478.255
ENSSSCG00000017131	FN3K	fructosamine 3 kinase	86.2803	-1.37711	0.329525	-4.17908	2.92694e-05	0.000279688	41.4688	32.0658	15.059	57.1633	30.8544	44.6723	47.7979	113.165	54.3115	272.296	50.579	38.6865	13.6885	34.5376	19.1508	13.4748	15.247	32.9681	157.266	42.715	199.626	222.697	33.6584	128.394	203.713	18.8509	60.693	44.9595	24.1833	28.2135	18.7352	72.3609	27.6795	472.197	27.1114	424.739	57.3906
ENSSSCG00000017257	ABCA9	ATP-binding cassette sub-family A member 9	30.883	-1.37599	0.392237	-3.50806	0.000451381	0.00276932	7.37223	7.48203	5.01967	28.0802	37.1656	47.0235	34.9292	67.6875	30.6978	108.918	35.079	7.96486	1.24441	4.60501	5.22296	24.2546	4.15827	37.7928	79.1828	13.5911	23.4855	40.2228	22.4389	18.342	61.4372	17.0556	15.9719	2.24798	8.06108	7.05336	33.3975	31.5617	33.0025	52.0381	28.5017	121.354	39.0256
ENSSSCG00000007199	SLC52A3	solute carrier family 52 member 3	15.0432	-1.37598	0.418646	-3.28674	0.00101354	0.00545026	0.921528	2.13772	2.00787	2.00573	2.10371	4.70235	12.8687	41.247	25.9751	45.1896	13.0526	2.27567	2.48882	3.45376	6.96394	8.08487	4.15827	1.6082	28.5938	26.2115	3.91424	25.5072	32.4774	22.0105	28.024	11.6696	3.19437	4.49595	2.68703	9.69838	4.07286	6.92818	21.292	53.9654	16.684	59.386	14.5389
ENSSSCG00000042664		-	10.6946	-1.37507	0.495347	-2.77597	0.00550376	0.0211579	1.84306	2.13772	2.00787	13.0372	0	0.783725	2.75757	43.3623	0	45.1896	0	6.82702	0	8.05877	26.1148	0.898319	4.15827	8.04101	18.6959	0	4.89281	17.6588	0.590498	7.33682	44.1917	4.48831	4.79156	4.49595	4.03054	4.40835	2.44372	12.3168	0	42.4014	0.695165	55.513	1.53042
ENSSSCG00000031450	MLYCD	malonyl-CoA decarboxylase	271.182	-1.37435	0.247392	-5.55537	2.77025e-08	7.88842e-07	160.346	333.485	44.1731	272.779	246.134	332.299	215.091	314.112	184.974	275.772	114.211	62.581	134.396	69.0751	113.164	164.392	164.945	371.495	566.377	213.575	776.978	510.143	101.566	696.998	402.037	333.033	307.458	222.55	124.947	194.849	182.464	290.214	360.899	503.035	135.557	393.755	143.859
ENSSSCG00000016459	EPHA1	EPH receptor A1	466.435	-1.37408	0.332536	-4.13211	3.59442e-05	0.000333298	212.873	578.254	441.731	552.579	701.938	1013.36	762.928	554.191	506.12	721.875	296.948	199.121	212.794	161.175	41.7836	92.5269	36.0383	650.518	346.425	49.5106	1043.15	1099.75	250.961	961.123	988.385	617.592	741.893	245.029	106.138	311.23	328.273	473.425	481.198	560.855	141.118	601.606	173.702
ENSSSCG00000017226	FADS6	fatty acid desaturase 6	967.482	-1.37329	0.311471	-4.40905	1.03825e-05	0.000116688	80.173	238.356	306.2	584.67	549.069	500.017	958.716	1680.55	660.396	2327.84	653.448	219.603	82.131	191.108	252.443	367.413	270.287	253.292	1944.38	869.833	1152.75	2375.11	598.174	1165.33	3896.41	531.416	505.509	225.922	151.817	226.589	516.439	597.363	383.255	6013.29	585.329	3348.86	533.35
ENSSSCG00000020927	SLC2A2	solute carrier family 2 member 2	2717.81	-1.36934	0.241761	-5.66402	1.47864e-08	4.6149e-07	1143.62	1625.74	1788.01	4738.54	722.274	3494.63	2984.61	4489.58	2104.77	5815.55	1414.58	1057.05	1220.77	2152.84	3447.15	975.575	521.169	4475.63	4678.38	419.384	4148.12	7083.14	1077.07	2935.95	7361.69	3206.45	2636.95	1580.33	2375.33	1197.31	456.161	3373.25	2185.62	4864.6	663.882	5573.25	570.08
ENSSSCG00000012926	PC	pyruvate carboxylase	6017.35	-1.36848	0.261927	-5.22466	1.74472e-07	3.80354e-06	1795.14	8252.68	2298	10714.6	3211.67	8475.2	7640.31	7035.26	2386.56	11058.7	1551.63	4271.44	5767.84	2948.36	5794	1203.75	1936.37	6390.19	6792.12	540.734	11178.1	12397.5	541.486	11961.5	10394.8	7253.12	9605.47	8018.53	3806.17	3827.33	1674.76	9257.58	9834.75	12252.1	501.214	9651.52	421.629
ENSSSCG00000029837	VWA8	von Willebrand factor A domain containing 8	686.814	-1.3682	0.263499	-5.19243	2.07563e-07	4.36058e-06	139.151	266.147	568.226	1319.77	865.327	1197.53	674.686	722.352	366.012	658.146	397.29	309.492	194.128	290.116	362.125	247.936	275.832	822.596	922.699	498.018	1573.53	2248.55	284.62	1166.55	1701.92	743.265	594.952	192.202	259.298	312.111	282.657	842.928	730.314	1757.73	257.906	1101.22	264.762
ENSSSCG00000038619	PAFAH2	platelet activating factor acetylhydrolase 2	338.764	-1.36308	0.219799	-6.20148	5.59354e-10	2.70375e-08	134.543	227.668	179.704	517.478	355.527	629.331	515.666	502.368	254.241	362.675	174.579	98.9918	77.1534	130.092	179.321	298.242	159.4	365.062	621.365	176.685	650.743	557.233	135.814	617.515	689.822	499.101	394.505	174.218	130.321	132.251	207.716	364.884	264.02	822.973	159.193	568.04	205.841
ENSSSCG00000026067	TMPRSS6	transmembrane serine protease 6	2866.63	-1.36209	0.357742	-3.80746	0.000140403	0.00105063	364.925	1874.78	3197.53	10084.8	766.452	2260.26	3349.53	2703.27	996.498	2412.43	526.185	1455.29	1311.61	4504.85	4632.76	1737.35	2370.21	3167.35	1941.08	447.537	2346.59	3288.46	174.787	14952.4	2224.67	5272.87	7960.37	2734.66	2266.51	495.499	878.924	3096.12	1857.72	4631.39	836.978	2152.1	790.46
ENSSSCG00000009185	ADH5	alcohol dehydrogenase 5 (class III), chi polypeptide	2992.42	-1.36186	0.18593	-7.32458	2.3965e-13	3.0355e-11	1077.27	2130.24	1669.54	4911.03	2383.51	4629.46	4138.2	3991.44	2469.99	3873.56	1195.13	1143.53	964.417	1935.26	2815.17	2778.5	1347.28	3956.98	4533.21	713.535	5578.78	5494.83	1160.33	5267.83	4423.48	3882.39	4840.27	2387.35	1699.55	1732.48	1555.02	5705.74	5003.61	3987.66	970.45	3431.48	941.206
ENSSSCG00000031538	RNASE4	angiogenin	3264.21	-1.36157	0.200333	-6.79653	1.0717e-11	8.3771e-10	1092.01	4126.87	1748.85	3729.66	1276.95	2933.48	2533.29	8141.53	2240.94	9895.36	1210.63	2002.59	2247.4	1616.36	4110.47	770.758	575.227	2593.23	5803.44	699.944	4542.48	6596.54	539.124	4118.4	6740.85	2723.51	2772.71	1997.33	1465.77	1775.68	1163.21	4861.27	3621.76	8908.15	1018.42	7618.2	963.397
ENSSSCG00000016159	CPS1	carbamoyl-phosphate synthase 1	27490.8	-1.35953	0.244462	-5.56132	2.67741e-08	7.67951e-07	6605.51	15143.6	21449	41319	15400.6	42999.1	39985.7	52266.3	3375.18	36148.2	1870.61	11378.4	4868.13	16129	21422.8	30292.2	6129.29	32694.8	50659.4	2500.77	46954.3	95180.9	2546.82	49072.3	100284	32586.1	34107.9	16065.2	10216.1	5267.98	14385.4	28800.4	32354.2	53435.4	1257.55	40820.2	1189.13
ENSSSCG00000035893		collectrin, amino acid transport regulator	335.884	-1.35914	0.275756	-4.92876	8.27551e-07	1.39558e-05	48.841	156.054	212.834	611.748	84.1485	449.075	309.767	528.808	185.761	486.657	146.026	278.77	111.997	271.696	531	124.866	95.6401	220.324	534.484	222.312	227.026	801.513	145.853	440.209	807.307	333.931	602.139	125.887	450.077	55.5452	62.7221	470.346	323.638	838.391	141.118	819.786	171.407
ENSSSCG00000003753		PDZK1 interacting protein 1	23.0974	-1.35848	0.421974	-3.21934	0.00128487	0.00660044	5.52917	0	19.0747	57.1633	10.5186	25.8629	32.1717	30.6709	4.72274	11.5871	2.44737	34.1351	6.22205	11.5125	29.5967	7.18655	16.6331	11.2574	108.876	11.6496	101.77	40.2228	4.13348	52.5805	25.8683	12.5673	13.5761	6.74393	29.5573	17.6334	5.70201	12.3168	44.7131	26.9827	4.86615	15.492	3.06083
ENSSSCG00000022196	CCT6B	chaperonin containing TCP1 subunit 6B	11.2801	-1.35593	0.38714	-3.50243	0.000461026	0.002814	5.52917	9.61975	7.02753	27.0774	7.71361	27.4304	19.303	11.6338	3.14849	27.809	3.26316	15.9297	4.97764	0	0	2.69496	4.15827	9.64921	6.59857	3.88319	25.4426	23.5451	1.77149	34.2385	14.012	10.772	14.3747	3.37196	9.4046	9.69838	6.51658	6.92818	18.0982	11.564	1.39033	18.074	10.7129
ENSSSCG00000027796	SLC22A7	solute carrier family 22 member 7	5405.65	-1.35557	0.388313	-3.49093	0.000481338	0.00292255	984.192	3089.01	5158.21	13829.5	421.444	8117.83	6770.76	10618.5	8353.74	6936.02	3958.21	2363.29	2773.79	5184.09	4385.54	689.011	200.983	2614.13	2033.46	1311.55	3309.49	9407.23	883.384	6984.65	9679.06	12369.8	8276.61	4908.46	5832.19	5696.47	1852.34	15191.2	4907.79	8106.38	3907.52	5442.86	3460.27
ENSSSCG00000001849	ANPEP	alanyl aminopeptidase, membrane	2198.12	-1.35516	0.240862	-5.62629	1.84132e-08	5.52809e-07	1219.18	1501.75	999.918	1356.88	1887.03	2538.49	3287.02	1728.15	3304.34	1567.73	2938.48	900.029	1014.19	924.456	779.961	801.301	630.67	2676.85	2905.57	1851.31	5159.95	4215.55	2442.89	4794.61	4847.08	2752.23	2712.02	1128.48	612.642	1601.11	829.235	2673.51	2524.16	4581.28	1668.4	2309.6	1664.33
ENSSSCG00000020780	PRSS57	serine protease 57	5.56586	-1.35409	0.520598	-2.60102	0.00929466	0.0323551	7.37223	8.55089	2.00787	4.01146	0.701237	5.48608	1.83838	5.28808	4.72274	0	1.63158	2.27567	4.97764	6.90751	1.74099	2.69496	0	5.62871	3.29928	1.94159	47.9495	6.86731	4.72398	22.0105	6.46708	2.69299	10.3817	4.49595	0	0.88167	4.88744	3.07919	5.32299	3.85467	2.78066	3.873	4.59125
ENSSSCG00000026947	GMPR2	guanosine monophosphate reductase 2	49.0747	-1.35306	0.445988	-3.03385	0.00241456	0.0108972	24.8813	81.2335	8.03147	70.2006	103.783	122.261	92.8382	24.3252	24.4008	30.1264	23.6579	5.68918	9.95528	5.75626	8.70493	41.3227	6.93044	160.82	6.59857	14.5619	102.749	90.2561	39.5633	99.047	85.1499	83.4827	100.623	48.3315	9.4046	33.5035	66.795	56.1952	78.7802	9.63668	8.34198	27.111	10.7129
ENSSSCG00000033620		solute carrier family 25 member 10	1186.37	-1.35244	0.18291	-7.39401	1.42463e-13	1.87284e-11	404.551	1059.24	1118.38	1787.11	875.144	1625.45	1706.02	1796.89	1127.95	2473.84	1312.61	613.294	301.147	637.794	766.033	363.819	404.738	785.607	1692.53	1194.08	1141	1737.43	485.98	1823.2	1657.73	1178.63	1519.72	482.191	334.535	469.049	559.611	1471.08	1109.31	2750.31	1320.81	2477.43	1331.46
ENSSSCG00000011215	OXSM	3-oxoacyl-ACP synthase, mitochondrial	182.182	-1.35243	0.232023	-5.82887	5.58036e-09	2.00489e-07	58.9778	119.713	37.1455	253.725	210.371	221.011	230.717	266.519	244.008	257.233	159.895	50.0648	51.0208	102.461	100.977	130.256	74.8488	238.818	313.432	110.671	317.054	282.541	91.5271	310.592	366.468	246.857	165.309	61.8194	60.4581	83.7587	91.2321	152.42	157.56	395.104	195.341	318.877	211.963
ENSSSCG00000015661	C4BPB	complement component 4 binding protein beta	685.915	-1.35182	0.303923	-4.44792	8.67058e-06	0.000100575	296.732	540.844	413.621	457.307	138.845	471.803	570.817	1013.2	598.214	1331.35	422.579	461.962	395.722	290.116	966.247	121.273	212.072	575.736	2598.73	191.247	1440.44	1548.09	109.242	881.641	977.607	385.097	424.851	587.846	413.802	566.032	140.107	789.042	729.249	2528.67	225.233	1319.4	244.101
ENSSSCG00000001987	RIPK3	receptor interacting serine/threonine kinase 3	39.0835	-1.35094	0.393099	-3.43665	0.000588962	0.00345746	18.4306	43.8233	12.0472	51.1461	41.373	86.2098	57.909	17.9795	22.8266	28.9677	14.6842	7.96486	16.1773	10.3613	8.70493	22.458	12.4748	70.7609	9.89785	0.970796	111.556	92.2182	18.3054	111.275	84.072	96.9476	70.2762	68.5633	16.1222	23.8051	41.5432	45.418	47.9069	13.4914	9.7323	33.566	6.12166
ENSSSCG00000028019	LRRC59	leucine rich repeat containing 59	520.67	-1.35059	0.370451	-3.64581	0.000266552	0.00178935	216.559	687.278	90.354	491.404	556.081	1294.71	792.342	175.564	103.113	96.1727	92.1843	192.294	241.415	131.243	421.318	309.022	139.995	1470.7	114.375	67.9557	1511.88	910.409	148.215	1258.26	627.307	1111.31	1061.33	1067.79	392.306	682.413	613.373	677.422	1112.5	181.17	63.9551	92.9521	68.1035
ENSSSCG00000009879	TPCN1	two pore segment channel 1	638.585	-1.35056	0.24029	-5.62054	1.90358e-08	5.67574e-07	191.678	477.781	507.99	802.292	668.98	805.669	909.079	1078.77	813.098	752.001	684.448	309.492	207.816	320.048	160.171	239.851	200.983	694.743	621.365	412.588	989.325	964.367	288.753	1588.42	882.756	850.984	930.36	211.31	149.13	415.267	500.962	892.195	669.632	1096.65	693.079	959.214	686.391
ENSSSCG00000000838	SLC41A2	solute carrier family 41 member 2	411.36	-1.34963	0.243607	-5.54018	3.02159e-08	8.47071e-07	314.241	483.125	210.826	775.215	230.006	833.884	691.231	402.952	125.153	504.038	133.79	201.397	370.834	207.225	336.01	252.428	77.621	842.698	225.451	45.6274	766.213	939.841	201.95	574.717	1006.71	808.794	522.28	337.196	249.894	277.726	118.113	592.744	707.957	379.685	72.2971	336.951	63.5122
ENSSSCG00000030906	MPL	MPL proto-oncogene, thrombopoietin receptor	23.9642	-1.34863	0.223422	-6.03621	1.57776e-09	6.67776e-08	15.666	30.997	17.0669	33.0946	14.0247	28.2141	24.8181	21.1523	19.6781	15.0632	12.2369	10.2405	16.1773	21.8738	29.5967	14.3731	13.8609	18.4943	41.7909	27.1823	35.2282	31.3934	7.67647	51.3577	26.9462	31.4182	52.7071	12.3639	17.4657	4.40835	8.9603	36.9503	45.7777	46.2561	16.684	23.238	12.2433
ENSSSCG00000006872	AGL	amylo-alpha-1, 6-glucosidase, 4-alpha-glucanotransferase	316.05	-1.34446	0.20713	-6.49091	8.53196e-11	5.01882e-09	118.877	160.329	208.818	428.223	244.031	460.047	398.929	567.94	350.27	563.132	208.027	138.816	114.486	161.175	167.135	161.697	110.887	255.704	599.37	282.502	257.362	683.788	188.369	352.167	665.031	442.548	294.681	38.2156	81.9543	103.155	108.338	353.337	251.245	898.139	245.393	781.056	248.693
ENSSSCG00000013788		adhesion G protein-coupled receptor E2-like	101.17	-1.33948	0.424866	-3.15272	0.0016176	0.00793162	70.9577	53.4431	25.0983	22.063	50.4891	41.5374	46.8787	271.807	314.062	316.327	261.869	19.3432	11.1997	11.5125	12.1869	10.7798	19.4052	30.5558	305.734	188.334	99.8132	175.607	296.43	23.2333	191.857	14.3626	19.9648	6.74393	0	14.1067	16.2915	10.7772	30.8733	175.388	161.973	285.311	136.972
ENSSSCG00000050649		-	82311.4	-1.33884	0.232865	-5.74943	8.95469e-09	2.96547e-07	15890.8	64006.6	37336.3	126925	27167.3	72460.9	110785	135106	46868.5	165545	37808.6	64572.2	53344.1	49424.4	104330	22564	10444.2	57467.5	84415.4	20993.5	104686	178142	17054.2	123715	209187	107593	83290.8	42446.3	96884.8	51607.7	22318.5	132036	93321.6	214532	38880.6	182341	40031.1
ENSSSCG00000028620	ABCD3	ATP binding cassette subfamily D member 3	2899.31	-1.33833	0.216173	-6.19102	5.97778e-10	2.8353e-08	1165.73	1436.55	1755.88	3051.72	3233.4	3743.07	3207.06	5920.54	3375.97	5872.33	2081.08	510.889	843.71	1110.96	1150.79	1079.78	607.107	2540.16	3785.38	1851.31	3098.12	6320.87	2111.62	3654.96	8535.47	2761.21	2597.02	577.73	1150.05	1611.69	1493.11	4208.48	3892.17	6784.22	2091.06	5787.56	2275.73
ENSSSCG00000048507		-	6.96715	-1.33775	0.470881	-2.84095	0.00449789	0.018005	1.84306	7.48203	3.0118	7.02006	8.41485	18.0257	9.1919	6.3457	1.57425	1.15871	4.89474	4.55135	3.73323	1.15125	0	0.898319	1.38609	18.4943	1.09976	3.88319	11.7427	9.81044	1.77149	26.9017	9.70062	6.28364	19.9648	7.86792	6.71757	7.05336	8.9603	4.61878	3.19379	3.85467	2.08549	11.619	11.4781
ENSSSCG00000028431	HSD17B4	hydroxysteroid 17-beta dehydrogenase 4	2798.99	-1.33445	0.149543	-8.92349	4.51837e-19	2.37598e-16	941.802	2548.17	1320.17	3611.32	1897.55	3087.09	3268.64	4829.08	2331.46	4638.31	1180.45	1777.3	1152.32	1343.51	2588.84	1170.51	986.895	3099.81	5290.95	892.162	4324.26	7689.43	1041.64	4419.21	6714.98	2989.22	2653.72	1480.29	1326.05	1546.45	1193.35	2996.05	3398.2	6042.2	1341.67	5147.22	1302.38
ENSSSCG00000033539	CRYBG2	crystallin beta-gamma domain containing 2	28.9385	-1.33181	0.339252	-3.92573	8.64688e-05	0.000696285	18.4306	10.6886	23.0905	42.1203	4.20742	33.7002	30.3333	46.5351	27.5493	83.4269	10.6053	11.3784	2.48882	14.9663	36.5607	21.5597	19.4052	12.8656	26.3943	32.0363	23.4855	25.5072	10.629	14.6736	71.1379	36.8042	10.3817	4.49595	12.0916	7.05336	3.25829	58.5046	53.2299	88.6575	18.7694	104.571	19.1302
ENSSSCG00000025560	PGLYRP2	peptidoglycan recognition protein 2	1805.9	-1.33172	0.352869	-3.77396	0.000160675	0.00117596	161.267	1648.18	296.16	1636.68	343.606	1072.92	1427.5	4993.01	856.39	5418.12	420.132	1821.68	1795.68	877.254	1152.53	236.258	200.983	1331.59	4362.75	130.087	2498.27	5128.9	98.6131	2945.73	5030.31	1570.91	1301.71	1525.25	1051.97	772.343	240.299	2064.6	1567.09	6248.42	366.352	3849.77	374.952
ENSSSCG00000005781	TARS3	threonyl-tRNA synthetase 3	417.21	-1.32964	0.19364	-6.86658	6.5758e-12	5.4598e-10	236.833	274.697	301.18	388.109	108.692	470.235	379.626	760.426	275.493	1088.03	232.5	145.643	126.93	115.125	233.292	115.883	164.945	459.946	535.584	127.174	559.737	969.272	67.3167	509.909	1255.69	395.869	265.133	216.93	253.924	301.531	120.557	611.219	450.325	1119.78	241.222	1287.13	270.884
ENSSSCG00000017343	GFAP	glial fibrillary acidic protein	45.1895	-1.32894	0.401269	-3.31184	0.000926844	0.00506408	18.4306	23.515	42.1652	31.0888	13.3235	57.9957	66.1817	79.3212	61.3956	128.617	95.4475	21.6189	6.22205	50.6551	38.3017	14.3731	18.0192	19.2984	41.7909	93.1964	31.314	96.1423	28.3439	122.28	81.9163	20.6462	17.569	0	1.34351	3.52668	25.2518	70.0516	37.2609	61.6748	10.4275	122.645	20.6606
ENSSSCG00000003400	NMNAT1	nicotinamide nucleotide adenylyltransferase 1	351.315	-1.32808	0.182711	-7.26871	3.62943e-13	4.34356e-11	121.642	315.314	179.704	462.321	296.623	504.719	437.535	538.327	305.404	425.246	155	134.265	97.0639	223.343	332.528	251.529	230.091	416.524	520.187	204.838	644.872	565.082	102.747	874.304	643.474	475.761	412.074	227.046	118.229	149.002	225.637	454.18	360.899	566.637	187.694	642.919	195.893
ENSSSCG00000051152		-	14.3998	-1.32511	0.433832	-3.05443	0.00225486	0.0103051	2.76458	9.61975	2.00787	8.02292	13.3235	11.7559	13.7879	23.2676	25.9751	55.618	52.2106	2.27567	3.73323	3.45376	3.48197	5.38992	0	7.23691	9.89785	5.82478	11.7427	29.4313	7.08597	13.4508	33.4132	9.87429	9.58311	0	0	5.29002	5.70201	10.0074	2.1292	3.85467	30.5872	61.9681	39.0256
ENSSSCG00000014247	ALDH7A1	aldehyde dehydrogenase 7 family member A1	1325.42	-1.32434	0.201589	-6.56951	5.04801e-11	3.17385e-09	468.136	819.817	548.148	1090.11	911.608	1331.55	1623.29	1966.11	824.118	1618.71	495.185	692.943	445.499	478.921	2231.94	670.146	774.824	1445.77	3358.67	640.726	2628.42	3941.84	423.977	2199.82	2903.72	934.467	1048.55	646.293	777.895	653.318	486.3	785.963	1748.07	3924.06	510.946	2437.41	553.245
ENSSSCG00000013388	PDE3B	phosphodiesterase 3B	308.902	-1.3239	0.199572	-6.63368	3.27422e-11	2.19372e-09	189.835	262.94	120.472	301.862	215.981	573.687	340.1	505.541	275.493	631.496	178.658	211.638	87.1087	115.125	107.941	100.612	105.343	455.121	484.995	140.765	462.859	651.413	111.604	517.246	746.948	327.647	281.903	211.31	108.825	218.654	122.186	334.092	370.48	491.471	164.754	741.035	162.224
ENSSSCG00000049063		-	10.1038	-1.32256	0.367765	-3.59621	0.000322891	0.00210013	3.68611	5.34431	5.01967	15.043	8.41485	6.2698	13.7879	1.05762	8.65836	8.11095	10.6053	3.41351	3.73323	13.815	3.48197	1.79664	1.38609	19.2984	16.4964	6.79557	15.657	12.7536	3.54299	20.7876	10.7785	24.2369	13.5761	7.86792	1.34351	4.40835	14.6623	16.9355	8.51678	23.128	9.7323	9.03701	20.6606
ENSSSCG00000028758	LBP	lipopolysaccharide binding protein	5228.43	-1.3219	0.254219	-5.19983	1.99472e-07	4.20589e-06	3076.06	8720.84	2569.07	8866.33	3983.73	7120.14	7006.07	3638.2	1145.26	3973.21	719.527	2854.83	5500.29	2354.31	5792.26	1812.81	1233.62	6458.54	8374.68	197.072	11480.5	9591.67	276.943	12247.6	3418.93	8378.79	8004.29	7686.96	5861.75	6751.83	3099.45	11656.3	11437	4739.32	545.009	2305.73	573.141
ENSSSCG00000003699	GREB1L	GREB1 like retinoic acid receptor coactivator	27.2069	-1.31707	0.37104	-3.54967	0.000385712	0.00243923	16.5875	13.8952	11.0433	64.1834	2.10371	33.7002	17.4646	17.9795	15.7425	59.0941	27.7369	17.0676	12.4441	13.815	24.3738	14.3731	9.70262	43.4215	5.4988	12.6204	16.6355	73.5783	5.90498	26.9017	92.6948	76.3014	32.7423	14.6118	17.4657	14.1067	9.77487	47.7274	5.32299	17.346	25.7211	87.7881	9.18249
ENSSSCG00000038475		glyoxylate/hydroxypyruvate reductase B	665.052	-1.31591	0.188176	-6.993	2.69077e-12	2.53766e-10	332.672	402.961	473.857	1095.13	446.688	902.068	875.069	911.665	746.98	545.751	554.737	265.116	250.126	514.61	927.945	389.871	245.338	459.142	1000.78	420.355	1016.73	1123.3	526.724	1095.63	1081.08	1363.55	905.604	400.14	368.123	297.123	284.286	977.643	766.51	1403.1	262.077	699.723	274.71
ENSSSCG00000004774	IVD	isovaleryl-CoA dehydrogenase	1076.49	-1.31395	0.250123	-5.25324	1.49447e-07	3.31825e-06	364.925	424.338	391.534	871.49	732.092	752.376	977.099	1813.81	737.535	2538.73	672.211	433.516	231.46	299.326	539.705	471.618	421.371	753.443	2219.32	685.382	2346.59	2773.41	333.631	1947.92	2683.84	579.89	627.694	324.833	294.23	526.357	370.631	776.725	726.055	5124.79	429.612	3217.17	415.508
ENSSSCG00000033251	TREM1	triggering receptor expressed on myeloid cells 1	31.6258	-1.31328	0.342185	-3.83793	0.000124075	0.000950167	13.8229	37.4102	38.1495	31.0888	35.0619	61.1306	125.01	9.51855	1.57425	8.11095	5.71053	11.3784	48.532	33.3863	45.2656	9.88151	37.4244	34.5764	51.6888	12.6204	57.7351	10.7915	4.13348	37.9069	17.2455	52.9621	15.1733	21.3558	21.4962	10.58	7.33115	70.8214	153.302	25.0554	4.17099	6.45501	2.29562
ENSSSCG00000017717	UNC45B	unc-45 myosin chaperone B	699.487	-1.31312	0.159576	-8.22881	1.89087e-16	5.46872e-14	208.265	1339.28	346.357	848.424	419.34	936.552	933.897	1313.56	1095.68	687.113	806.001	468.789	355.901	246.368	551.892	324.293	451.865	791.236	971.089	458.216	626.279	1152.73	444.054	918.325	1361.32	1077.2	927.965	304.601	286.168	432.019	324.2	930.685	740.96	907.775	396.939	1049.58	446.116
ENSSSCG00000030318	SDHC	succinate dehydrogenase complex subunit C	1249.28	-1.31275	0.297193	-4.41716	1.00005e-05	0.000113129	477.352	1718.73	465.825	1473.21	1725.04	2000.07	1462.43	1559.98	1107.48	1453.02	385.869	434.654	418.122	363.796	421.318	752.792	257.813	1786.71	1604.55	257.261	3142.16	2726.32	589.907	3148.72	2719.41	1763.01	1728.95	1447.7	378.871	917.819	1268.29	1588.86	1852.4	1158.33	310.043	1049.58	306.848
ENSSSCG00000017998	GLP2R	glucagon like peptide 2 receptor	39.007	-1.31187	0.289713	-4.52818	5.94937e-06	7.37951e-05	18.4306	11.7575	13.0511	69.1977	25.2445	48.591	69.8585	54.9961	50.3759	63.7289	37.5263	5.68918	19.9106	10.3613	22.6328	9.88151	15.247	23.3189	26.3943	94.1672	27.3997	24.5261	35.4299	41.5753	34.4911	41.2925	59.0959	14.6118	8.06108	33.5035	54.5764	55.4254	57.4883	50.1107	80.6391	20.656	114.016
ENSSSCG00000022635	BEX4	brain expressed X-linked 4	189.211	-1.31135	0.285481	-4.59349	4.359e-06	5.72177e-05	78.3299	188.12	53.2085	224.642	199.853	257.062	173.727	342.668	201.504	361.517	75.8685	81.9243	59.7317	55.2601	52.2296	56.5941	18.0192	147.955	388.216	46.5982	275.954	450.299	109.833	383.96	471.019	184.021	191.662	184.334	80.6108	209.838	140.107	237.098	267.214	344.993	72.2971	242.708	91.8249
ENSSSCG00000010400	MSMB	microseminoprotein beta	18.7898	-1.31082	0.347363	-3.77363	0.000160888	0.00117622	8.29375	24.5838	2.00787	40.1146	20.3359	40.7537	12.8687	12.6914	8.65836	20.8567	8.1579	9.1027	14.9329	12.6638	12.1869	25.1529	0	32.164	3.29928	6.79557	41.0996	22.564	12.9909	22.0105	23.7126	27.8276	31.1451	11.2399	8.06108	26.4501	8.9603	43.8784	61.7467	13.4914	4.86615	14.201	5.35645
ENSSSCG00000045759		-	4.72953	-1.3093	0.446777	-2.93054	0.00338377	0.0142279	1.84306	6.41317	4.01573	7.02006	0.701237	1.56745	3.67676	2.11523	2.36137	1.15871	6.52632	6.82702	1.24441	3.45376	6.96394	0.898319	5.54436	6.43281	12.0974	7.76637	4.89281	0	1.181	6.11401	1.07785	2.69299	7.98593	2.24798	2.68703	0.88167	2.44372	6.15838	7.45218	11.564	11.8178	6.45501	10.7129
ENSSSCG00000024496	NSUN7	NOP2/Sun RNA methyltransferase family member 7	6.40173	-1.30777	0.432148	-3.02621	0.00247642	0.0111071	1.84306	4.27545	1.00393	11.0315	2.10371	3.91863	4.59595	12.6914	11.8069	5.79354	8.1579	9.1027	4.97764	2.3025	6.96394	0	0	3.2164	5.4988	6.79557	3.91424	6.86731	19.4864	1.2228	6.46708	5.38598	10.3817	3.37196	1.34351	2.64501	0.814573	9.23757	5.32299	13.4914	15.2936	2.582	22.9562
ENSSSCG00000015105	SLC37A4	solute carrier family 37 member 4	3702.42	-1.30739	0.166287	-7.86228	3.77206e-15	7.35467e-13	832.14	2601.61	2278.93	4110.74	2335.82	3746.21	5213.65	5509.12	2535.32	6880.4	2248.32	1159.46	1791.95	2421.08	3527.24	1261.24	1404.11	2889.14	4014.13	2841.52	4374.17	6462.14	1069.98	5868.23	6607.2	5438.04	3823.66	2097.36	2196.65	2477.49	1727.71	5909.73	4534.12	12252.1	2627.03	7393.56	2528.25
ENSSSCG00000040267		cystin 1	26.4451	-1.30509	0.340097	-3.83742	0.000124336	0.000951741	1.84306	29.9281	18.0708	16.0458	17.5309	45.4561	15.6262	27.498	16.5296	25.4916	48.1316	6.82702	12.4441	16.1175	1.74099	4.4916	12.4748	25.7312	28.5938	11.6496	58.7137	41.2039	50.7828	39.1297	46.3474	56.5528	39.9296	30.3477	6.71757	15.8701	21.1789	41.5691	25.5503	13.4914	29.1969	49.058	30.6083
ENSSSCG00000024481		myomegalin	285.892	-1.30106	0.241306	-5.39173	6.97824e-08	1.73985e-06	94.9174	264.009	125.492	227.65	317.66	480.424	382.383	268.635	151.915	250.281	197.421	119.473	99.5528	102.461	128.833	263.208	164.945	742.185	201.256	98.0504	571.48	554.29	122.824	635.857	699.522	405.744	440.025	138.251	98.0765	182.506	202.014	360.265	358.769	373.903	173.791	413.12	166.815
ENSSSCG00000004534	CCDC68	coiled-coil domain containing 68	84.214	-1.29939	0.292039	-4.44938	8.61182e-06	0.000100094	22.1167	82.3023	34.1337	141.404	66.6175	89.3447	146.151	64.5146	84.2222	44.0309	27.7369	68.2702	48.532	85.1927	121.869	61.0857	20.7913	187.356	69.2849	24.2699	144.827	108.896	14.1719	245.783	49.5809	218.132	121.386	91.043	53.7406	71.4153	61.093	133.175	87.297	40.4741	87.5907	11.619	86.4685
ENSSSCG00000031640		endogenous retrovirus group V member 2 Env polyprotein	3777.11	-1.28705	0.313384	-4.10695	4.00916e-05	0.000366742	2397.82	2938.3	1801.06	2907.31	2334.42	2395.85	2129.76	10469.3	7957.03	11700.6	4972.24	551.851	403.189	705.718	550.151	1268.43	1013.23	1779.48	8514.35	8807.06	3256.65	7397.07	6953.7	1719.26	8357.62	710.949	1670.66	206.814	284.825	569.559	535.174	1023.83	1452.11	9463.22	4396.22	11147.8	5010.58
ENSSSCG00000012607	TMEM255A	transmembrane protein 255A	12.0626	-1.28692	0.372275	-3.4569	0.000546428	0.00324658	10.1368	7.48203	6.0236	12.0344	2.10371	10.9722	8.27271	13.749	11.0197	19.698	7.34211	3.41351	11.1997	2.3025	13.9279	5.38992	5.54436	1.6082	18.6959	9.70796	6.84993	38.2607	4.13348	28.1245	11.8563	12.5673	12.7775	1.12399	14.7787	1.76334	4.88744	26.9429	12.7752	28.91	17.3791	18.074	24.4866
ENSSSCG00000001582	MDGA1	MAM domain containing glycosylphosphatidylinositol anchor 1	29.2765	-1.28645	0.35593	-3.61434	0.000301117	0.00198907	7.37223	11.7575	0	44.1261	36.4643	23.5118	54.2322	60.2841	51.9501	53.3005	25.2895	9.1027	7.46646	2.3025	5.22296	7.18655	13.8609	8.84511	23.095	33.9779	27.3997	66.711	22.4389	9.78242	73.2936	30.5205	21.562	7.86792	6.71757	6.17169	10.5894	30.7919	10.646	59.7474	50.747	108.444	60.4514
ENSSSCG00000012536	PLP1	proteolipid protein 1	1729.06	-1.28563	0.284202	-4.52364	6.07843e-06	7.51275e-05	1019.21	1675.98	989.878	2139.11	831.667	3742.29	3199.7	2805.86	1438.07	2138.97	1027.9	1046.81	1343.96	1623.27	2144.89	513.839	160.786	1358.93	2021.36	177.656	2666.58	4175.32	698.559	2055.53	3925.52	3103.22	1760.9	939.654	1322.02	754.71	374.703	2564.19	1990.8	3642.67	200.903	2202.45	197.424
ENSSSCG00000004134	PEX3	peroxisomal biogenesis factor 3	208.466	-1.28422	0.175939	-7.29923	2.89426e-13	3.53691e-11	123.485	137.883	90.354	261.748	180.218	275.871	333.666	313.054	312.488	307.057	90.5527	77.3729	78.3978	86.3439	254.184	117.68	117.818	184.139	346.425	230.079	266.169	362.005	155.891	216.436	327.665	320.466	194.058	71.9352	112.855	116.381	61.093	252.494	241.664	427.869	141.118	367.935	158.398
ENSSSCG00000051635		-	8.1568	-1.28374	0.422795	-3.03632	0.00239486	0.0108309	10.1368	11.7575	4.01573	24.0688	3.50619	7.05353	11.9495	0	0	0	1.63158	3.41351	12.4441	3.45376	6.96394	8.08487	0	13.6697	17.5962	0	22.5069	7.84835	0.590498	15.8964	1.07785	10.772	15.1733	11.2399	16.1222	7.93503	0.814573	21.5543	17.0336	13.4914	0	0	0
ENSSSCG00000015106	HYOU1	hypoxia up-regulated 1	4255.83	-1.28093	0.250215	-5.11931	3.06656e-07	6.10952e-06	2136.1	7640.22	1905.47	5950	4005.47	7434.42	7735.91	1395	1049.24	1385.81	1376.24	2218.78	1623.95	2173.56	2897	6914.36	3370.97	4030.16	4273.67	689.265	18536.9	4358.78	1656.94	10657.9	2264.56	9757.6	6550.86	3284.29	2869.75	3472.02	3649.29	5783.49	9304.58	1886.86	1071.25	988.907	1166.18
ENSSSCG00000043454		-	5.35936	-1.2804	0.504681	-2.53705	0.0111791	0.0373705	1.84306	10.6886	1.00393	7.02006	6.31114	14.1071	4.59595	2.11523	8.65836	8.11095	4.89474	4.55135	1.24441	2.3025	1.74099	2.69496	2.77218	22.5148	1.09976	1.94159	3.91424	14.7157	4.13348	3.66841	3.23354	5.38598	7.98593	2.24798	1.34351	1.76334	4.07286	4.61878	0	0	5.56132	15.492	9.9477
ENSSSCG00000038207	sscmir503	ssc-mir-503	4.34443	-1.27994	0.475342	-2.69267	0.00708828	0.0259719	4.60764	4.27545	0	5.01433	2.80495	10.1884	8.27271	2.11523	6.29699	10.4284	7.34211	0	0	3.45376	1.74099	0.898319	0	5.62871	2.19952	0	3.91424	8.8294	2.36199	7.33682	5.38923	9.87429	3.19437	5.61994	2.68703	7.05336	3.25829	6.92818	3.19379	3.85467	0.695165	5.164	6.12166
ENSSSCG00000051033		-	13.2552	-1.27952	0.354558	-3.60877	0.000307656	0.00202076	0	1.06886	1.00393	5.01433	5.6099	2.35118	11.0303	5.28808	13.3811	4.63483	13.8684	3.41351	2.48882	5.75626	6.96394	4.4916	13.8609	7.23691	32.9928	29.1239	26.4212	31.3934	21.2579	31.7929	14.012	8.07897	11.9789	10.1159	10.7481	5.29002	10.5894	22.3241	13.8398	28.91	24.3308	24.529	25.2519
ENSSSCG00000016270	C2orf72	chromosome 15 C2orf72 homolog	728.431	-1.27806	0.243705	-5.24427	1.56903e-07	3.45525e-06	192.599	541.913	357.4	670.917	604.466	840.153	706.857	1237.41	896.534	1605.97	753.79	187.743	80.8866	346.527	215.882	274.886	273.06	689.919	871.011	453.362	1144.92	1467.64	259.228	1435.57	1496.05	612.206	685.991	479.943	232.428	573.967	702.162	922.987	885.745	1713.4	573.511	1354.26	610.636
ENSSSCG00000000493	FRS2	fibroblast growth factor receptor substrate 2	30.768	-1.27783	0.340182	-3.75631	0.000172435	0.00125094	11.0583	37.4102	5.01967	31.0888	34.3606	72.1027	43.2019	16.9219	23.6137	23.1741	14.6842	5.68918	17.4217	16.1175	45.2656	12.5765	15.247	149.563	14.2969	17.4743	64.585	51.0143	21.8484	31.7929	58.2037	70.0177	37.5339	25.8517	29.5573	22.0418	26.8809	19.2449	35.1317	5.78201	11.1226	7.74601	13.7737
ENSSSCG00000050646		-	6.72071	-1.27531	0.500118	-2.55001	0.0107719	0.0363384	7.37223	3.20658	12.0472	11.0315	0.701237	10.1884	5.51514	8.46093	9.44548	13.9045	9.78948	5.68918	0	3.45376	6.96394	0.898319	2.77218	4.02051	3.29928	5.82478	0.978561	12.7536	4.72398	15.8964	28.024	10.772	2.39578	0	1.34351	0.88167	0	6.92818	6.38759	15.4187	2.08549	15.492	0
ENSSSCG00000032942		death associated protein	1723.06	-1.27403	0.157077	-8.11083	5.02746e-16	1.28296e-13	633.09	1818.13	1525.98	2417.91	1382.84	2218.73	2468.03	2353.2	1449.88	2086.83	712.185	846.551	836.243	922.153	1681.79	1160.63	586.316	1454.62	2202.82	610.631	2866.21	2758.7	644.823	3705.09	2650.42	2562.83	2310.33	1028.45	843.727	1169.98	1188.46	2568.81	2710.47	3322.73	882.859	2287.65	883.05
ENSSSCG00000048463		-	48.3625	-1.27398	0.32534	-3.91585	9.00849e-05	0.000720388	33.175	16.0329	11.0433	65.1862	43.4767	50.9421	73.5352	60.2841	46.4403	79.9508	36.7106	4.55135	21.155	16.1175	0	28.7462	20.7913	24.123	72.5842	71.8389	69.4778	60.8248	34.8394	121.057	94.8505	56.5528	30.3465	35.9676	17.4657	29.9768	17.9206	76.9797	57.4883	138.768	38.2341	92.9521	39.0256
ENSSSCG00000026978	ROS1	ROS proto-oncogene 1, receptor tyrosine kinase	30.9621	-1.26925	0.365324	-3.47431	0.000512163	0.00307741	9.21528	19.2395	15.059	13.0372	5.6099	38.4025	27.5757	13.749	13.3811	24.3329	26.1053	6.82702	49.7764	6.90751	47.0066	10.7798	11.0887	129.46	32.9928	14.5619	45.0138	6.86731	14.7624	55.0261	14.012	86.1756	36.7353	64.0673	36.2749	52.0186	30.1392	93.9153	8.51678	28.91	19.4646	27.111	11.4781
ENSSSCG00000039873	DCXR	L-xylulose reductase	2003.91	-1.26918	0.256354	-4.95087	7.38806e-07	1.27062e-05	525.271	1034.66	811.178	2187.25	849.198	1297.85	2224.44	3829.63	1243.65	4601.23	1062.16	1368.82	723.002	703.415	1695.72	555.161	1020.16	780.782	4813.65	933.906	2806.51	3504.29	447.597	2989.75	2927.43	894.072	1155.56	1363.4	777.895	970.719	658.175	2004.55	2206.91	11770.2	608.269	6247.15	550.95
ENSSSCG00000013335	LGR4	leucine rich repeat containing G protein-coupled receptor 4	1255.27	-1.26901	0.179848	-7.05598	1.71394e-12	1.72919e-10	523.428	1093.45	850.332	1830.23	894.779	1821.38	1660.98	1938.61	1779.69	1523.7	810.08	768.04	555.007	848.473	1206.5	553.365	303.553	2011.86	1601.25	520.347	1689.98	2774.39	643.052	1298.62	3195.81	1691.2	1435.87	422.62	682.505	902.831	449.644	1675.08	1537.28	1597.76	727.837	1923.59	701.695
ENSSSCG00000003712	OSBPL1A	oxysterol binding protein like 1A	485.712	-1.26864	0.189028	-6.71139	1.92774e-11	1.39967e-09	285.674	259.733	302.184	563.61	381.473	793.914	464.191	1209.91	436.853	787.921	354.053	164.986	210.305	164.629	236.774	156.308	113.659	429.39	671.954	232.02	723.157	1087.98	452.321	518.468	1505.75	700.177	406.484	189.954	182.718	241.578	215.862	613.528	422.645	1121.71	212.72	904.992	251.753
ENSSSCG00000031082	ATP13A2	ATPase cation transporting 13A2	421.431	-1.26664	0.187371	-6.76009	1.37905e-11	1.04725e-09	192.599	433.958	248.975	459.312	399.004	536.852	585.524	424.104	283.364	539.958	265.948	169.538	141.863	242.914	336.01	195.834	180.192	497.739	354.123	260.173	884.619	699.485	274.581	1056.5	711.379	641.829	713.942	413.628	239.145	256.566	366.558	695.897	666.438	441.36	212.025	391.173	179.824
ENSSSCG00000040905	FAAP24	FA core complex associated protein 24	16.0106	-1.26386	0.27341	-4.62259	3.78977e-06	5.09008e-05	12.9014	13.8952	6.0236	15.043	15.4272	29.7816	22.9798	10.5762	11.8069	23.1741	6.52632	2.27567	2.48882	14.9663	20.8918	17.9664	13.8609	11.2574	23.095	18.4451	25.4426	8.8294	18.8959	23.2333	18.3234	32.3159	31.1451	6.74393	2.68703	7.93503	7.33115	28.4825	19.1628	19.2734	19.4646	12.91	16.8346
ENSSSCG00000003815	ALG6	ALG6 alpha-1,3-glucosyltransferase	104.561	-1.26357	0.134293	-9.40903	5.00746e-21	3.47578e-18	52.5271	117.575	66.2596	246.705	93.2646	144.205	152.586	92.0126	92.0934	93.8553	84.8422	55.754	62.2205	62.1676	142.761	70.0689	54.0575	129.46	169.363	87.3717	115.47	155.986	73.2217	155.296	123.952	154.398	143.747	42.7116	60.4581	63.4803	52.9472	156.269	125.623	131.059	95.9327	71.0051	78.0512
ENSSSCG00000005349	GRHPR	glyoxylate and hydroxypyruvate reductase	1326.43	-1.26313	0.316478	-3.99121	6.57375e-05	0.000554028	283.831	2085.35	445.746	959.742	2461.34	1895.83	1212.41	1307.21	941.4	1792.52	577.579	434.654	331.013	322.351	879.198	416.82	413.055	1748.92	1549.56	459.187	3943.6	2705.72	490.704	4012.02	2521.08	999.997	1448.65	1669.12	532.032	1018.33	1660.91	1468	1689.52	2081.52	403.195	1502.73	413.212
ENSSSCG00000000659		ovostatin homolog 2	46.28	-1.26232	0.319227	-3.9543	7.67587e-05	0.000630679	23.9597	51.3054	29.1141	26.0745	44.8792	39.1863	59.7474	84.6093	102.326	72.9986	123.184	25.0324	14.9329	10.3613	19.1508	5.38992	8.31653	70.7609	36.2921	27.1823	31.314	72.5973	26.5724	39.1297	58.2037	35.0089	55.9015	3.37196	1.34351	21.1601	33.3975	53.8858	13.8398	69.3841	100.799	104.571	117.077
ENSSSCG00000039556	KCNQ1	potassium voltage-gated channel subfamily Q member 1	193.055	-1.26079	0.172812	-7.2957	2.97105e-13	3.60535e-11	59.8993	86.5778	69.2714	313.897	86.2522	152.826	178.323	162.873	145.618	282.725	162.342	93.3026	104.53	115.125	205.436	71.8655	81.7793	163.233	237.548	162.123	280.847	278.617	146.443	262.903	354.611	217.234	331.416	162.978	162.565	117.262	115.669	324.854	236.341	595.547	127.91	378.263	114.016
ENSSSCG00000014347	PROB1	proline rich basic protein 1	29.5075	-1.2605	0.399064	-3.15864	0.00158506	0.00779858	17.509	57.7185	11.0433	23.0659	24.5433	66.6166	44.1211	15.8642	37.7819	16.2219	22.8421	11.3784	3.73323	10.3613	1.74099	23.3563	13.8609	87.647	9.89785	10.6788	81.2206	45.128	19.4864	62.3629	57.1259	42.1902	53.5057	48.3315	9.4046	29.0951	19.5497	38.4899	33.0025	0	11.8178	18.074	13.0085
ENSSSCG00000012594	IL13RA2	interleukin 13 receptor subunit alpha 2	55.6725	-1.26026	0.431044	-2.92373	0.00345869	0.0144867	11.9799	27.7904	10.0393	66.1891	66.6175	42.3212	80.8888	113.165	107.836	92.6966	36.7106	32.9973	23.6438	5.75626	8.70493	15.2714	13.8609	16.8861	183.66	175.714	64.585	125.574	99.2036	45.2437	111.018	5.38598	27.1522	6.74393	8.06108	3.52668	12.2186	1.53959	28.7441	102.149	75.0778	125.227	85.7033
ENSSSCG00000014049	UNC5A	unc-5 netrin receptor A	6.30624	-1.25819	0.358301	-3.51155	0.000445501	0.00273947	6.4507	5.34431	4.01573	7.02006	4.90866	7.83725	10.1111	5.28808	2.36137	5.79354	2.44737	2.27567	3.73323	0	8.70493	8.98319	1.38609	11.2574	7.69833	2.91239	12.7213	1.96209	8.26697	14.6736	6.46708	13.4649	8.78452	6.74393	0	2.64501	5.70201	11.547	9.58138	15.4187	3.47582	2.582	0.765208
ENSSSCG00000017344	FAM187A	coiled-coil domain containing 103	7.52354	-1.25717	0.410314	-3.06393	0.00218449	0.0100844	0	7.48203	6.0236	8.02292	4.20742	10.1884	9.1919	3.17285	12.594	10.4284	18.7632	1.13784	1.24441	8.05877	0	5.38992	2.77218	8.04101	1.09976	22.3283	7.82849	13.7346	16.5339	25.6789	7.54492	7.1813	7.98593	0	1.34351	2.64501	4.88744	6.92818	6.38759	9.63668	5.56132	5.164	9.18249
ENSSSCG00000036067	PDP2	pyruvate dehyrogenase phosphatase catalytic subunit 2	286.299	-1.25714	0.189326	-6.64011	3.13441e-11	2.14139e-09	145.601	456.404	97.3815	481.375	291.715	452.993	273.919	215.754	193.632	289.677	153.369	130.851	179.195	151.965	158.43	215.597	108.115	578.149	278.239	149.503	507.873	501.314	110.423	584.5	422.516	522.44	458.392	260.765	196.153	164.872	194.683	369.503	419.451	325.72	148.07	294.348	110.19
ENSSSCG00000033381	IRF4	interferon regulatory factor 4	35.6182	-1.25348	0.338852	-3.69918	0.000216295	0.0015159	18.4306	45.9611	28.1101	112.321	9.11608	97.1819	13.7879	3.17285	3.14849	16.2219	4.07895	19.3432	37.3323	58.7139	48.7476	23.3563	37.4244	70.7609	61.5866	20.3867	113.513	17.6588	8.85746	29.3473	20.4791	46.6785	80.6579	29.2237	52.397	11.4617	11.404	22.3241	77.7156	13.4914	17.3791	32.275	3.82604
ENSSSCG00000005626	FPGS	folylpolyglutamate synthase	264.662	-1.25138	0.282678	-4.42688	9.56074e-06	0.000109006	164.954	220.185	108.425	316.905	283.3	332.299	368.595	285.556	114.133	237.535	172.948	127.438	110.752	109.369	64.4165	162.596	70.6905	398.834	137.47	46.5982	633.129	586.665	122.233	763.029	462.396	451.524	564.605	302.353	80.6108	233.643	212.603	356.416	351.317	252.481	161.973	302.094	122.433
ENSSSCG00000022009	DDC	Sus scrofa dopa decarboxylase (DDC), mRNA.	1425.21	-1.25092	0.199787	-6.26125	3.81915e-10	1.90442e-08	796.2	1854.47	781.06	1846.27	1675.26	2789.28	2522.26	2169.17	739.896	756.636	1121.71	694.081	622.205	651.609	1218.69	1016.9	557.208	1323.55	2176.43	631.018	2609.82	1594.2	373.785	2465.17	1068.15	2697.48	1990.89	1306.07	1133.93	1466.22	957.937	2511.85	2631.69	2229.93	342.716	1013.44	395.612
ENSSSCG00000011385	APEH	acylaminoacyl-peptide hydrolase	59.243	-1.25066	0.320007	-3.90824	9.29728e-05	0.000742115	29.4889	90.8532	15.059	72.2063	70.1237	122.261	68.0201	47.5927	47.2274	55.618	29.3684	26.1703	16.1773	25.3276	19.1508	29.6445	15.247	126.244	24.1947	14.5619	134.063	120.668	30.1154	111.275	132.575	73.6084	98.2269	77.5552	29.5573	58.1903	73.3115	79.2891	120.3	19.2734	27.8066	34.857	26.7823
ENSSSCG00000006078	POP1	POP1 homolog, ribonuclease P/MRP subunit	128.352	-1.2485	0.170157	-7.33735	2.17872e-13	2.84265e-11	63.5854	126.126	47.1849	143.41	108.692	236.685	213.252	112.107	85.7964	121.664	84.8422	65.9945	74.6646	72.5289	142.761	100.612	72.0766	201.025	119.874	100.963	173.205	230.545	47.8303	169.97	132.575	288.15	214.821	60.6954	106.138	102.274	74.1261	167.046	204.403	109.858	127.91	127.809	117.842
ENSSSCG00000002032	SLC7A8	solute carrier family 7 member 8	57.8223	-1.24687	0.43369	-2.87503	0.00403986	0.016464	12.9014	10.6886	8.03147	28.0802	48.3854	18.8094	32.1717	130.087	119.643	178.441	40.7895	4.55135	3.73323	5.75626	0	17.9664	1.38609	16.8861	126.472	155.327	42.0781	194.247	90.3461	31.7929	260.839	15.2603	17.569	2.24798	5.37406	5.29002	17.106	14.6261	18.0982	156.114	66.0406	187.195	55.095
ENSSSCG00000035629	CA5A	carbonic anhydrase 5A	276.153	-1.24415	0.260865	-4.76933	1.84841e-06	2.80759e-05	28.5674	120.781	109.429	241.691	215.981	163.799	257.373	368.051	433.705	757.795	358.948	86.4756	43.5543	101.31	81.8263	53.0008	60.9879	109.358	359.622	299.976	335.646	677.902	330.679	336.271	916.169	100.538	138.955	69.6873	59.1146	74.942	113.226	178.593	177.788	1052.33	245.393	876.59	281.596
ENSSSCG00000024206	CPPED1	calcineurin like phosphoesterase domain containing 1	131.619	-1.24333	0.161036	-7.72081	1.15589e-14	1.94739e-12	67.2716	119.713	36.1416	158.453	87.6547	124.612	170.969	264.404	69.2669	265.344	64.4474	87.6134	63.4649	66.7726	114.905	72.7639	27.7218	106.141	201.256	73.7805	216.262	195.228	64.3642	211.545	288.863	185.816	156.524	97.787	94.046	58.1903	66.795	171.665	139.462	329.575	98.7134	178.158	74.2252
ENSSSCG00000008633	PDIA6	protein disulfide isomerase family A member 6	6594.82	-1.2425	0.192226	-6.46373	1.02154e-10	5.90891e-09	3346.99	11098	3333.06	9083.95	5574.84	8980.71	12417.3	5487.97	3323.23	5471.42	2315.21	3498.85	3683.45	3633.35	5142.87	7241.35	4594.89	4272.99	9496.43	1889.17	18189.5	11692.1	2349	18987.7	6722.53	9777.34	7948.39	3957.56	4523.61	4442.74	4538.8	8861.91	11053.7	7518.54	2581.84	4358.42	2618.54
ENSSSCG00000012305	USP27X	ubiquitin specific peptidase 27 X-linked	60.8265	-1.24169	0.279151	-4.44811	8.66306e-06	0.000100555	10.1368	37.4102	16.0629	51.1461	25.2445	59.5631	81.8079	174.507	51.9501	190.028	38.3421	7.96486	23.6438	18.42	36.5607	18.8647	11.0887	27.3394	24.1947	16.5035	45.0138	114.782	10.629	84.3734	292.096	37.7018	51.1099	70.8113	28.2138	53.7819	32.5829	57.7348	101.137	67.4568	35.4534	211.724	35.1996
ENSSSCG00000008586	TP53I3	tumor protein p53 inducible protein 3	29.0149	-1.24085	0.291975	-4.24985	2.13912e-05	0.000215459	10.1368	25.6527	21.0826	78.2235	14.726	40.7537	65.2625	33.8437	7.87123	19.698	14.6842	19.3432	3.73323	39.1426	17.4099	28.7462	23.5635	16.082	23.095	35.9195	30.3354	27.4692	20.0769	81.9278	31.2575	54.7574	59.0959	28.0997	10.7481	14.9884	11.404	30.0221	59.6175	21.2007	17.3791	19.365	16.8346
ENSSSCG00000012467	KLHL4	kelch like family member 4	12.0997	-1.23943	0.461438	-2.68602	0.00723085	0.0263552	5.52917	9.61975	0	4.01146	8.41485	13.3233	7.35352	17.9795	27.5493	63.7289	12.2369	1.13784	0	1.15125	0	5.38992	0	10.4533	9.89785	16.5035	13.6999	24.5261	12.9909	7.33682	98.084	8.07897	7.98593	1.12399	1.34351	1.76334	4.07286	2.30939	1.0646	5.78201	15.9888	18.074	9.18249
ENSSSCG00000001347	PPP1R10	protein phosphatase 1 regulatory subunit 10	599.177	-1.23832	0.237225	-5.22002	1.78903e-07	3.87578e-06	225.774	539.775	383.503	664.9	676.694	965.549	1118.65	446.314	455.744	684.796	386.685	269.667	275.015	232.553	287.263	339.565	299.395	1149.06	644.46	400.939	1195.8	1078.17	294.068	1010.04	577.726	973.964	845.71	323.709	198.84	327.1	866.705	1090.03	348.123	526.163	638.161	782.347	646.601
ENSSSCG00000027628	IL6R	interleukin 6 receptor	1239.21	-1.23562	0.230606	-5.35816	8.40746e-08	2.00957e-06	289.36	2241.4	969.8	2381.8	953.683	1812.76	1057.99	576.401	488.804	1044	341	349.316	574.917	979.716	2950.97	897.421	754.032	2592.42	1104.16	232.02	2596.12	1207.67	255.685	2323.33	839.642	2154.39	2327.9	2137.83	1305.9	755.592	1440.16	1555.76	2351.7	545.436	225.929	965.669	270.118
ENSSSCG00000005467	HSDL2	hydroxysteroid dehydrogenase like 2	2654.56	-1.23391	0.185864	-6.63876	3.16327e-11	2.15264e-09	1215.5	1834.17	1250.9	3217.19	2637.35	2740.69	3183.16	4823.79	3224.06	4091.4	1554.9	1443.92	950.729	847.322	2099.63	1022.29	1179.56	2510.4	6100.37	1220.29	3368.21	6341.47	1212.88	4114.73	5078.81	2104.12	2546.71	1283.59	1436.22	1502.37	1176.24	2762.03	3046.88	6248.42	2269.02	4332.6	2246.65
ENSSSCG00000007650	STAG3	stromal antigen 3	54.3739	-1.23363	0.409135	-3.01521	0.00256801	0.0114439	14.7445	14.9641	46.1809	50.1433	23.8421	28.9978	98.3534	95.1855	47.2274	30.1264	22.8421	10.2405	16.1773	27.6301	8.70493	26.0513	65.1462	38.5969	127.572	24.2699	62.6279	286.465	18.8959	289.804	65.7486	55.6551	66.2832	10.1159	14.7787	17.6334	43.1724	61.5838	13.8398	115.64	28.5017	18.074	26.0171
ENSSSCG00000017227	FDXR	ferredoxin reductase	236.634	-1.233	0.198969	-6.19696	5.75627e-10	2.76529e-08	88.4667	256.527	174.684	465.329	214.579	321.327	349.292	302.478	210.949	561.973	209.658	69.4081	51.0208	124.335	100.977	136.545	113.659	168.057	257.344	186.393	338.582	300.2	88.5746	386.406	364.312	319.568	361.762	125.887	92.7025	124.316	206.087	270.199	198.015	395.104	159.193	497.035	164.52
ENSSSCG00000017510	CACNB1	calcium voltage-gated channel auxiliary subunit beta 1	82.6347	-1.23178	0.224854	-5.47813	4.29839e-08	1.14931e-06	36.8611	74.8203	44.1731	94.2693	47.6841	136.368	138.798	29.6133	36.2077	88.0618	55.4737	47.7892	41.0655	37.9913	47.0066	60.1874	77.621	132.677	97.8787	137.853	177.12	119.687	57.2783	194.426	25.8683	118.492	174.892	74.1832	47.023	60.8353	65.9804	137.024	100.072	53.9654	82.0294	50.349	55.8602
ENSSSCG00000001723	PLA2G7	phospholipase A2 group VII	336.275	-1.22863	0.279544	-4.39512	1.10712e-05	0.000122759	116.113	331.347	230.905	210.602	335.893	464.749	210.495	601.784	331.379	314.01	147.658	77.3729	111.997	209.528	107.941	194.037	94.2541	356.217	845.716	98.0504	917.89	1193.93	197.817	485.453	993.774	368.042	402.491	127.011	64.4887	141.067	200.385	304.07	255.503	645.658	111.226	529.31	114.016
ENSSSCG00000010517	PGAM1	phosphoglycerate mutase 1	614.933	-1.2284	0.426314	-2.88144	0.00395864	0.0161897	206.422	777.062	113.444	739.112	1084.11	1408.35	585.524	439.968	195.207	305.899	59.5527	139.954	126.93	139.302	188.026	612.654	171.875	1440.95	156.166	50.4814	1885.69	1162.54	144.672	1694.8	1076.77	1443.44	1397.54	799.156	224.367	552.807	1010.07	922.217	1176.38	102.149	50.0519	129.1	39.7908
ENSSSCG00000000194		tubulin alpha-1C chain	1380.9	-1.2278	0.221019	-5.5552	2.77297e-08	7.88842e-07	259.871	936.323	492.931	1790.11	1056.76	1199.88	2018.54	2710.67	1212.17	1814.54	864.738	731.629	629.671	762.129	1211.73	691.706	623.74	710.825	4153.8	1144.57	1613.65	2406.5	879.251	1453.91	2189.11	1429.98	1050.95	439.479	1053.31	629.513	1175.43	1632.74	1589.44	3891.29	1464.02	1710.58	1467.67
ENSSSCG00000049683		uncharacterized LOC102165634	269.71	-1.2277	0.385793	-3.18229	0.00146117	0.00731342	154.817	91.9221	57.2242	90.2579	456.505	692.813	284.03	710.718	99.1775	229.424	283.895	39.8243	21.155	39.1426	43.5246	184.155	84.5514	336.114	514.688	200.955	410.017	855.471	243.285	533.142	835.331	209.155	297.076	61.8194	60.4581	71.4153	140.107	186.291	73.4572	691.914	90.3714	529.31	75.7556
ENSSSCG00000021624	LAD1	ladinin 1	329.838	-1.22752	0.296677	-4.13757	3.5101e-05	0.000326915	195.364	452.128	325.274	373.066	261.561	367.567	568.06	185.083	89.7321	586.306	111.763	50.0648	69.6869	386.821	174.099	313.513	291.079	299.93	368.42	139.795	689.886	336.498	44.2873	1435.57	236.048	476.659	530.266	247.277	72.5498	205.429	247.63	527.311	564.237	580.128	66.7358	256.909	77.286
ENSSSCG00000006138	ATP6V0D2	ATPase H+ transporting V0 subunit d2	99.85	-1.22747	0.394163	-3.11413	0.00184491	0.00879327	11.0583	16.0329	35.1377	83.2378	50.4891	68.9678	109.384	223.157	146.405	31.2851	68.5264	21.6189	13.6885	44.8988	29.5967	25.1529	8.31653	16.8861	95.6792	139.795	76.3278	65.73	1167.41	42.7981	82.9942	58.3481	43.124	10.1159	18.8092	21.1601	48.8744	62.3536	92.62	113.713	276.676	32.275	241.806
ENSSSCG00000003572	SYTL1	synaptotagmin like 1	25.5889	-1.22652	0.301405	-4.06934	4.71467e-05	0.000420204	7.37223	23.515	15.059	26.0745	9.11608	34.4839	39.5252	20.0947	25.1879	45.1896	14.6842	0	4.97764	8.05877	27.8558	8.98319	52.6714	10.4533	32.9928	23.2991	41.0996	30.4124	12.9909	20.7876	36.6468	39.4972	24.7564	17.9838	16.1222	16.7517	10.5894	39.2597	30.8733	59.7474	31.9776	59.386	28.3127
ENSSSCG00000030271	GSTO2	glutathione S-transferase omega-2	20.3341	-1.22444	0.481478	-2.54309	0.0109876	0.0368921	2.76458	7.48203	6.0236	10.0287	8.41485	7.83725	11.9495	7.40332	2.36137	6.95224	4.89474	3.41351	7.46646	9.21002	6.96394	8.98319	4.15827	5.62871	12.0974	0.970796	15.657	5.88627	3.54299	19.5648	5.38923	16.1579	7.98593	6.74393	6.71757	112.854	4.88744	8.46777	340.671	13.4914	6.25648	40.021	3.06083
ENSSSCG00000017203	GALK1	galactokinase 1	3696.88	-1.22375	0.208578	-5.86713	4.434e-09	1.62327e-07	1293.83	4007.16	2003.85	6646.99	1614.25	4125.53	4976.5	5187.61	1868.63	4157.44	1152.71	2599.96	2594.59	2528.15	4803.38	1439.11	1250.25	2880.29	6678.85	921.286	5881.15	5091.62	421.025	7567.93	3488.99	4621.17	5103.81	6442.7	3909.63	3342.41	1990.82	6753.43	5507.16	7880.88	1218.62	3653.53	1179.19
ENSSSCG00000034625		peroxisomal membrane protein 4	265.924	-1.22227	0.20596	-5.93452	2.94698e-09	1.13642e-07	104.133	193.464	140.551	368.052	257.354	384.809	386.979	387.088	244.795	296.629	152.553	106.957	116.974	127.789	149.725	159.901	58.2157	311.187	309.033	144.649	441.331	471.882	138.176	694.552	440.839	394.972	303.465	240.533	130.321	266.264	168.617	320.236	303.41	485.689	154.327	304.676	179.059
ENSSSCG00000001566	RAB44	RAB44, member RAS oncogene family	4.90315	-1.21893	0.477525	-2.5526	0.0106922	0.0361186	2.76458	10.6886	3.0118	1.00287	5.6099	7.83725	4.59595	2.11523	2.36137	3.47612	2.44737	2.27567	3.73323	5.75626	0	1.79664	1.38609	9.64921	5.4988	0	16.6355	1.96209	4.13348	26.9017	4.31139	1.79533	13.5761	5.61994	0	3.52668	5.70201	6.92818	8.51678	1.92734	0	3.873	0
ENSSSCG00000039009		prune homolog 2 with BCH domain	5.723	-1.21874	0.434196	-2.80689	0.00500226	0.0195726	2.76458	3.20658	0	3.0086	5.6099	9.4047	10.1111	5.28808	1.57425	10.4284	3.26316	6.82702	3.73323	0	1.74099	4.4916	1.38609	9.64921	10.9976	0.970796	9.78561	26.4882	2.95249	12.228	14.012	14.3626	7.98593	2.24798	2.68703	0	4.07286	1.53959	5.32299	3.85467	0	5.164	4.59125
ENSSSCG00000003541	STPG1	sperm tail PG-rich repeat containing 1	3.86801	-1.21833	0.465294	-2.6184	0.0088342	0.0310324	1.84306	8.55089	8.03147	3.0086	0.701237	7.83725	6.43433	6.3457	1.57425	2.31741	3.26316	3.41351	2.48882	5.75626	3.48197	0	0	3.2164	2.19952	0.970796	4.89281	2.94313	2.36199	4.89121	4.31139	8.97663	6.38874	4.49595	4.03054	0	0	3.84899	9.58138	7.70935	2.08549	5.164	0
ENSSSCG00000048659		-	6.729	-1.21763	0.442102	-2.75419	0.00588377	0.0223123	2.76458	1.06886	6.0236	11.0315	8.41485	4.70235	1.83838	11.6338	10.2326	12.7458	13.8684	0	2.48882	1.15125	0	2.69496	1.38609	1.6082	5.4988	6.79557	4.89281	9.81044	8.85746	11.0052	6.46708	7.1813	4.79156	0	1.34351	1.76334	0.814573	10.0074	6.38759	25.0554	12.513	20.656	11.4781
ENSSSCG00000002296		retinol dehydrogenase 11	4067.35	-1.21708	0.218806	-5.56237	2.6613e-08	7.64595e-07	1756.43	3477.01	5692.3	8218.48	3080.54	6895.21	7448.2	6010.43	1242.08	5233.88	1454.55	1467.81	704.336	4115.73	4537.01	4123.29	1997.35	5620.67	7498.17	1062.05	4593.37	5401.63	1164.46	9509.74	6914.38	3670.54	3740.61	1587.07	2126.78	1554.39	2293.02	5704.2	6324.77	6936.48	1200.55	4890.31	1244.23
ENSSSCG00000004456	PGM3	phosphoglucomutase 3	263.97	-1.21708	0.305383	-3.98541	6.73646e-05	0.000563906	139.151	318.521	74.2911	401.146	327.478	510.989	308.848	229.503	199.929	148.315	110.947	143.367	95.8195	88.6464	120.128	297.344	79.0071	476.832	125.373	49.5106	634.108	482.674	143.491	626.075	433.294	511.668	365.755	220.302	143.756	242.459	293.246	331.013	700.505	102.149	75.7729	121.354	94.1206
ENSSSCG00000011880	EAF2	ELL associated factor 2	8.37919	-1.21298	0.489138	-2.47984	0.0131441	0.0426496	6.4507	3.20658	4.01573	18.0516	0.701237	8.62098	21.1414	1.05762	10.2326	16.2219	0.81579	12.5162	8.71087	13.815	59.1935	7.18655	4.15827	7.23691	26.3943	0.970796	5.87137	5.88627	0.590498	7.33682	1.07785	7.1813	10.3817	2.24798	6.71757	0.88167	2.44372	6.92818	7.45218	3.85467	2.78066	3.873	3.82604
ENSSSCG00000011916	ATP6V1A	ATPase H+ transporting V1 subunit A	530.166	-1.21033	0.196912	-6.14656	7.91819e-10	3.64053e-08	334.515	592.149	270.058	943.696	544.861	1073.7	882.423	724.467	431.344	509.831	221.895	201.397	277.503	247.519	336.01	563.246	121.976	930.345	801.726	187.364	706.521	828.982	318.869	907.32	793.295	985.634	713.143	399.016	357.375	329.745	347.823	704.365	743.089	501.107	147.375	467.342	169.111
ENSSSCG00000012885	LRP5	LDL receptor related protein 5	991.19	-1.20994	0.207746	-5.82417	5.73986e-09	2.04106e-07	496.704	933.116	620.431	1108.17	910.907	1501.62	1296.98	528.808	601.362	1166.82	718.711	546.162	410.655	612.466	522.296	497.669	576.613	1473.92	575.175	582.478	2249.71	1618.72	568.649	2591.12	1447.55	1349.19	1642.71	907.059	335.878	720.325	778.731	1415.66	1741.68	1439.72	618.697	1066.37	501.211
ENSSSCG00000011171	CTSV	cathepsin V	7717.28	-1.20974	0.184503	-6.55673	5.50022e-11	3.4078e-09	2889.91	5979.21	3186.48	10764.8	3891.17	6605.24	7724.88	17215.9	7270.66	20944.8	4805.82	3811.75	3819.09	3679.4	4604.91	4483.51	1056.2	5876.37	10389.4	1999.84	9141.72	16581.6	4302.37	10938	15336.7	7806.97	6844.74	4243.06	4596.16	4530.9	4755.48	12412.2	9803.88	20067.4	3320.11	16554.5	3304.17
ENSSSCG00000011662	COPB2	COPI coat complex subunit beta 2	426.751	-1.20938	0.325365	-3.717	0.000201606	0.00142388	267.243	610.32	116.456	513.467	493.671	956.145	443.969	224.215	203.865	237.535	199.053	188.881	186.661	168.083	188.026	347.65	135.837	1354.91	131.971	100.963	1215.37	701.447	227.342	877.972	691.977	797.125	618.909	532.77	212.275	416.148	499.333	484.203	958.138	173.46	101.494	118.772	94.1206
ENSSSCG00000015346	ICA1	islet cell autoantigen 1	168.743	-1.20937	0.169867	-7.11952	1.08307e-12	1.1971e-10	71.8792	192.395	107.421	181.519	90.4596	250.008	302.414	92.0126	97.6033	148.315	64.4474	101.267	70.9313	93.2514	210.659	138.341	153.856	127.048	201.256	108.729	353.261	218.773	59.6403	287.359	157.366	265.708	165.309	98.911	141.069	165.754	173.504	304.07	489.715	213.934	100.104	154.92	90.2945
ENSSSCG00000036572	BCO1	beta-carotene oxygenase 1	523.941	-1.20783	0.264937	-4.55892	5.14183e-06	6.54631e-05	58.0563	160.329	71.2793	220.63	250.342	347.974	423.747	1559.98	1153.14	1610.6	572.685	227.567	151.818	148.512	167.135	67.3739	144.153	203.438	574.075	429.092	384.575	1391.12	221.437	545.37	1565.03	324.954	226.002	128.135	189.435	56.4269	123.815	252.494	209.726	1559.22	1050.39	1537.58	1078.18
ENSSSCG00000004746		inositol-trisphosphate 3-kinase A	97.3252	-1.20725	0.306034	-3.94483	7.98576e-05	0.000650596	68.1931	145.365	78.3068	55.1576	14.0247	108.154	78.1312	139.605	206.226	397.437	84.8422	58.0297	18.6661	88.6464	66.1574	13.4748	23.5635	86.8429	81.3823	43.6858	72.4135	90.2561	20.0769	85.5962	142.276	101.436	81.4565	42.7116	18.8092	71.4153	30.1392	187.831	118.17	117.568	107.751	327.914	129.32
ENSSSCG00000006702	FMO5	flavin containing dimethylaniline monoxygenase 5	42.2757	-1.20679	0.329291	-3.66481	0.000247526	0.00169507	17.509	16.0329	6.0236	32.0917	16.8297	10.9722	22.0606	49.708	32.2721	308.216	33.4474	10.2405	6.22205	14.9663	15.6689	17.0681	5.54436	24.9271	103.378	25.2407	40.121	87.3129	52.5543	51.3577	140.12	24.2369	19.1662	7.86792	9.4046	8.8167	15.4769	20.0147	9.58138	119.495	16.684	157.502	16.0694
ENSSSCG00000012649	SMARCA1	SWI/SNF related, matrix associated, actin dependent regulator of chromatin, subfamily a, member 1	1184.77	-1.20458	0.176249	-6.83454	8.22676e-12	6.63995e-10	365.847	945.943	759.978	1798.14	742.61	1529.05	1311.68	2038.03	1582.12	2112.32	710.553	651.981	401.944	701.113	811.299	677.333	295.237	1365.36	1437.39	404.822	1034.34	3049.09	622.975	1626.33	2884.32	1484.73	1391.15	575.482	671.757	720.325	648.4	1785.16	1302	1821.33	802.915	1879.7	893.763
ENSSSCG00000008877	ETFDH	electron transfer flavoprotein dehydrogenase	1438.41	-1.20333	0.149628	-8.04215	8.82784e-16	2.09849e-13	514.213	1009.01	934.662	1816.19	1297.29	1720.28	1557.11	2561.55	1253.89	2447.19	801.922	621.259	546.296	714.928	1068.96	928.862	709.678	1637.95	2274.31	1073.7	2254.61	3211.94	702.102	2268.3	2965.16	1706.46	1537.29	476.571	568.306	617.169	785.248	1502.64	1729.97	2960.39	988.524	2500.67	956.51
ENSSSCG00000027617	SYNPR	synaptoporin	47.6747	-1.20324	0.410366	-2.93211	0.00336667	0.0141732	11.0583	10.6886	37.1455	43.1232	12.6223	32.9165	51.4747	88.8398	74.7767	158.743	26.1053	7.96486	54.754	25.3276	31.3377	1.79664	5.54436	45.0297	78.083	1.94159	67.5207	169.721	12.4005	106.384	151.976	33.2135	43.9226	6.74393	36.2749	11.4617	5.70201	21.5543	14.9044	106.003	38.2341	98.1161	40.556
ENSSSCG00000036449	G6PC	glucose-6-phosphatase catalytic subunit	12368.7	-1.2028	0.353909	-3.3986	0.000677325	0.00390226	4509.04	6201.54	9121.74	20907.7	2270.61	11052.9	12563.5	26705.9	391.2	36742.6	309.184	1911.57	4563.25	8810.53	9714.7	9671.31	2099.92	4886.52	22733.2	2160.02	7523.18	39273.2	762.923	12667	33457.4	28365.3	10426.4	12940.5	10658.1	984.826	3384.55	15437.5	16764.2	32151.8	247.479	35031.3	240.275
ENSSSCG00000022618	CMTM8	CKLF like MARVEL transmembrane domain containing 8	405.836	-1.20273	0.215082	-5.59194	2.2455e-08	6.57102e-07	260.792	382.652	427.676	629.799	382.174	538.419	567.14	806.961	410.091	679.003	347.527	158.159	204.083	214.133	186.285	163.494	41.5827	402.855	571.876	88.3425	581.265	586.665	357.842	665.205	611.139	454.217	421.657	213.558	190.779	341.206	272.067	612.759	707.957	495.325	248.174	530.601	262.466
ENSSSCG00000005717	UCK1	uridine-cytidine kinase 1	189.153	-1.20164	0.325956	-3.6865	0.000227357	0.00157939	122.563	407.236	130.511	251.719	178.114	375.404	177.404	82.4941	64.5441	84.5856	89.7369	89.8891	78.3978	71.3776	45.2656	88.9336	58.2157	357.825	87.9809	17.4743	543.101	259.977	69.6787	494.012	203.713	373.428	390.512	393.396	111.512	164.872	294.875	352.567	235.276	80.9481	51.4422	68.4231	51.2689
ENSSSCG00000034639	MGAM	maltase-glucoamylase	174.468	-1.20042	0.322812	-3.71865	0.000200294	0.00141519	53.4486	105.817	99.3894	118.338	124.119	143.422	164.535	337.38	125.153	227.107	155.816	59.1675	146.84	153.117	52.2296	26.0513	113.659	439.039	373.919	21.3575	499.066	478.75	49.0113	432.872	377.246	202.872	82.255	110.151	64.4887	49.3735	54.5764	112.39	173.529	402.813	41.7099	245.29	39.0256
ENSSSCG00000021355	SOD1	superoxide dismutase 1	3051.24	-1.20037	0.153008	-7.84517	4.32365e-15	8.06756e-13	1039.48	2262.78	1853.26	3820.92	2361.07	3681.16	5304.65	5418.17	2274	5372.93	1643.82	1806.89	1462.18	1375.75	3927.66	1591.82	1395.79	2012.67	5366.83	2022.17	4033.63	6355.21	1781.53	4274.92	5422.65	2690.3	2559.49	999.226	1886.29	1165.57	1460.53	2933.7	3330.06	8484.13	1731.66	5978.63	1814.31
ENSSSCG00000006871	SLC35A3	solute carrier family 35 member A3	845.076	-1.20009	0.158327	-7.57984	3.45975e-14	5.31301e-12	417.452	702.242	615.411	1782.09	518.916	1300.2	1307.09	1135.88	915.424	667.415	443.79	521.129	363.368	655.063	995.844	615.349	343.75	1297.02	1128.35	490.252	942.354	1802.18	875.708	978.242	1313.89	1326.75	1186.71	370.916	525.314	412.622	430.094	934.534	1092.28	1191.09	453.942	821.077	394.082
ENSSSCG00000029256	AKR1A1	aldo-keto reductase family 1 member A1	1864.24	-1.19958	0.209439	-5.72757	1.0188e-08	3.32318e-07	551.995	1810.65	781.06	2283.52	847.095	1565.1	2035.09	3002.57	1185.41	3030.02	838.632	1413.19	1042.82	828.902	2432.16	1079.78	1494.2	737.361	4249.48	2066.83	2342.68	2563.47	659.586	3308.9	2017.73	2088.86	1644.3	811.52	1614.9	900.186	770.586	2193.15	2530.55	6637.75	1369.47	2971.88	1275.6
ENSSSCG00000003382	TAS1R1	taste 1 receptor member 1	5.13186	-1.19724	0.428294	-2.79537	0.00518411	0.0201208	0	3.20658	1.00393	2.00573	2.80495	3.1349	4.59595	8.46093	8.65836	10.4284	4.89474	2.27567	1.24441	0	0	0.898319	2.77218	1.6082	7.69833	6.79557	8.80705	8.8294	5.31448	6.11401	8.62277	8.97663	5.59015	1.12399	6.71757	3.52668	4.07286	5.38858	2.1292	19.2734	9.03714	7.74601	6.12166
ENSSSCG00000032452	WFS1	wolframin ER transmembrane glycoprotein	615.885	-1.19712	0.213743	-5.60077	2.13404e-08	6.29026e-07	267.243	687.278	376.475	1123.21	262.964	1007.09	955.958	154.412	86.5836	347.612	166.421	250.324	520.163	795.515	1100.3	557.856	819.179	521.058	479.496	200.955	1455.12	727.935	115.147	1274.16	326.587	1339.31	963.901	404.636	609.955	455.824	435.796	1487.25	1321.17	634.094	111.922	336.951	107.894
ENSSSCG00000013455	IZUMO4	IZUMO family member 4	68.4716	-1.19466	0.345919	-3.45359	0.000553172	0.00327774	9.21528	10.6886	15.059	28.0802	39.2693	33.7002	68.0201	109.992	66.9055	266.503	60.3685	36.4108	18.6661	20.7225	22.6328	13.4748	15.247	33.7723	183.66	67.9557	63.6065	159.91	21.2579	84.3734	135.809	14.3626	26.3536	24.7277	14.7787	18.5151	16.2915	26.1731	23.4211	333.429	63.26	327.914	58.921
ENSSSCG00000023791		-	128.51	-1.19407	0.306095	-3.90098	9.58056e-05	0.000760528	57.1347	37.4102	38.1495	70.2006	25.2445	114.424	41.3636	159.7	22.8266	269.979	24.4737	22.7567	54.754	18.42	45.2656	25.1529	27.7218	134.285	130.872	6.79557	229.962	580.778	20.0769	121.057	718.924	141.831	118.99	179.838	69.8627	105.8	38.2849	178.593	90.4908	433.651	18.0743	367.935	13.7737
ENSSSCG00000040007	PIGV	phosphatidylinositol glycan anchor biosynthesis class V	204.567	-1.19335	0.218093	-5.47173	4.45658e-08	1.18794e-06	50.6841	144.296	76.2989	291.834	215.981	304.085	246.343	209.408	187.335	297.788	130.526	54.6162	107.019	93.2514	107.941	145.528	54.0575	252.488	214.453	94.1672	359.132	373.778	142.9	415.753	364.312	289.047	248.362	198.946	163.909	163.109	166.173	323.315	273.602	194.661	140.423	318.877	154.572
ENSSSCG00000003835	C8A	complement C8 alpha chain	4510.62	-1.19319	0.312337	-3.8202	0.000133345	0.00100957	1349.12	2727.73	1702.67	3809.88	689.316	2756.36	2374.27	9150.5	2975.33	9750.52	1755.58	3216.67	3468.17	2764.16	7299.95	494.974	1097.78	3067.65	12374.5	1169.81	7175.79	11336.9	524.952	4636.87	10885.2	2893.17	2121.86	3623.74	3434.02	2353.18	505.85	4749.65	3665.41	18737.6	1480.01	13382.5	1391.15
ENSSSCG00000037905	ITGB5	integrin subunit beta 5	570.112	-1.19184	0.218971	-5.44292	5.24136e-08	1.35954e-06	218.402	875.398	449.762	908.596	284.702	510.989	636.08	355.359	305.404	1072.96	223.527	281.046	696.869	315.443	1361.45	194.037	279.99	428.586	933.697	275.706	1619.52	796.608	258.047	879.195	753.415	596.946	400.095	488.935	530.688	362.367	259.034	890.655	770.769	728.533	164.059	791.384	195.893
ENSSSCG00000023229	ETV5	ETS variant transcription factor 5	295.065	-1.19155	0.268296	-4.44119	8.94634e-06	0.000103222	69.1146	176.362	187.736	227.65	304.337	386.377	397.09	649.377	310.127	479.705	388.316	87.6134	38.5767	70.2264	69.6394	211.105	84.5514	239.622	268.342	429.092	198.648	424.792	413.348	506.24	441.917	193.895	200.447	70.8113	80.6108	233.643	184.908	443.403	540.816	794.063	339.24	463.469	312.205
ENSSSCG00000013030	PRDX5	peroxiredoxin 5	3361.12	-1.19148	0.199316	-5.97787	2.26078e-09	9.03946e-08	1271.71	4518.08	2545.98	6040.26	2147.19	3549.49	4117.97	6040.05	1837.15	4597.75	1075.21	2562.41	2278.51	1835.1	3365.32	1642.13	826.109	2033.57	7638.94	611.602	5415.36	5329.03	418.663	6095.67	4684.32	3969.47	3618.42	3343.87	1741.19	2459.86	2631.88	4530.26	4405.3	7547.45	1152.58	5269.87	1213.62
ENSSSCG00000009625		PDZ and LIM domain 2	168.267	-1.1879	0.243828	-4.87187	1.10545e-06	1.80459e-05	89.3882	159.26	79.3107	190.544	214.579	119.126	182	202.005	203.865	222.472	89.7369	53.4783	69.6869	109.369	120.128	107.798	91.4819	144.738	249.646	87.3717	136.02	209.943	115.738	578.386	176.767	211.848	229.196	97.787	59.1146	57.3086	181.65	337.171	264.02	329.575	137.643	160.084	157.633
ENSSSCG00000008240		SH2 domain containing 6	7.98115	-1.18564	0.363613	-3.26072	0.00111131	0.00584736	3.68611	14.9641	4.01573	6.01719	7.71361	8.62098	7.35352	12.6914	14.1682	17.3806	12.2369	0	0	5.75626	1.74099	2.69496	5.54436	8.84511	6.59857	22.3283	9.78561	10.7915	7.08597	11.0052	9.70062	10.772	15.1733	6.74393	0	0.88167	6.51658	7.69797	5.32299	0	10.4275	10.328	10.7129
ENSSSCG00000008227	ST3GAL5	ST3 beta-galactoside alpha-2,3-sialyltransferase 5	290.18	-1.18316	0.252598	-4.68396	2.81382e-06	3.95691e-05	132.7	288.593	299.172	372.063	257.354	429.481	337.343	358.532	324.295	340.66	145.211	105.819	77.1534	180.747	76.6033	350.345	90.0958	262.137	436.605	104.846	641.936	544.48	174.787	688.438	558.324	375.223	344.992	106.779	84.6414	133.132	150.696	373.352	307.669	549.291	152.241	432.485	148.45
ENSSSCG00000000699	LPAR5	lysophosphatidic acid receptor 5	107.66	-1.18193	0.227272	-5.20052	1.98729e-07	4.20043e-06	65.4285	168.88	49.1927	147.421	98.8744	160.664	159.939	140.663	121.217	180.758	92.1843	44.3756	12.4441	77.1339	48.7476	80.8487	51.2853	93.2757	195.757	71.8389	103.727	127.536	44.2873	189.534	182.156	83.4827	138.157	41.5876	32.2443	74.0603	80.6427	150.88	111.783	258.263	47.9664	219.47	36.73
ENSSSCG00000013100		membrane spanning 4-domains A4A	216.889	-1.17933	0.301929	-3.90598	9.38451e-05	0.000747242	380.591	331.347	110.433	361.031	272.781	358.162	329.07	481.215	232.989	293.153	274.921	59.1675	62.2205	86.3439	33.0787	123.07	73.4627	168.057	531.184	140.765	366.96	246.242	201.36	427.981	148.743	59.2458	148.538	84.2991	32.2443	96.1021	152.325	228.63	200.144	391.249	98.0182	339.533	100.242
ENSSSCG00000009181	C4orf17	chromosome 8 C4orf17 homolog	47.3319	-1.17913	0.321079	-3.67241	0.000240277	0.00165392	6.4507	21.3772	29.1141	92.2636	16.1285	59.5631	59.7474	59.2265	35.4206	180.758	35.8948	59.1675	19.9106	12.6638	43.5246	16.1697	4.15827	53.8748	42.8907	7.76637	82.1991	80.4456	5.90498	46.4665	97.0062	26.9299	54.3043	29.2237	47.023	29.9768	10.5894	53.116	37.2609	86.7301	12.513	179.449	16.0694
ENSSSCG00000028144	EPHX3	epoxide hydrolase 3	11.4316	-1.179	0.368496	-3.19949	0.00137671	0.00696503	2.76458	8.55089	10.0393	9.02579	12.6223	7.83725	20.2222	14.8066	20.4652	37.0786	5.71053	1.13784	1.24441	1.15125	1.74099	7.18655	5.54436	9.64921	15.3967	21.3575	10.7642	13.7346	11.81	19.5648	14.012	11.6696	8.78452	2.24798	4.03054	4.40835	7.33115	13.0866	9.58138	36.6194	18.0743	20.656	3.06083
ENSSSCG00000032916		mitochondrial pyruvate carrier 1	3675.49	-1.17857	0.186255	-6.32771	2.48834e-10	1.30849e-08	1069.89	1780.72	2099.22	5487.68	3362.43	3897.47	3981.01	6935.85	3529.46	8039.11	3137.53	1589.56	1908.92	2301.35	3450.63	2078.71	857.989	2313.4	6245.54	1828.98	3642.2	7544.23	1689.41	5831.55	7513.67	4376.11	3838.04	1576.96	1980.34	1977.59	1878.4	6107.57	4167.9	6998.16	2023.62	6979.15	1972.71
ENSSSCG00000001908	CCDC33	coiled-coil domain containing 33	73.8183	-1.17835	0.407721	-2.89009	0.00385137	0.0158269	6.4507	41.6856	52.2045	136.39	9.81732	51.7259	97.4342	52.8808	0.787123	135.569	0	13.654	69.6869	63.3189	74.8624	40.4244	167.717	87.647	128.672	5.82478	150.698	131.46	3.54299	222.55	56.048	64.6317	84.6508	62.9433	45.6795	2.64501	17.106	87.7569	40.4547	302.592	0	219.47	2.29562
ENSSSCG00000031940	GAS2	growth arrest specific 2	399.414	-1.17807	0.281335	-4.18744	2.82115e-05	0.000271372	119.799	126.126	110.433	303.868	429.858	418.509	353.888	1032.23	754.851	601.369	363.027	161.573	93.3307	71.3776	132.315	116.782	48.5131	395.618	623.564	235.903	564.63	1115.45	610.575	558.821	1251.38	249.55	250.758	160.73	92.7025	223.944	202.014	258.652	238.47	668.786	576.987	659.702	602.218
ENSSSCG00000034632	PDXP	pyridoxal phosphatase	42.0713	-1.1779	0.254689	-4.62487	3.74827e-06	5.04415e-05	22.1167	44.8922	21.0826	53.1519	27.3483	48.591	56.0706	27.498	18.891	42.8722	18.7632	12.5162	14.9329	41.4451	59.1935	61.984	24.9496	21.7107	45.0902	18.4451	54.7994	33.3555	16.5339	96.6014	30.1797	79.892	29.5479	37.0916	29.5573	44.0835	30.9538	153.19	145.85	46.2561	10.4275	24.529	12.2433
ENSSSCG00000038801	NPNT	nephronectin	224.915	-1.17774	0.235626	-4.99836	5.78201e-07	1.03974e-05	57.1347	121.85	145.57	307.88	51.1903	173.203	295.979	462.178	523.437	504.038	237.395	87.6134	108.264	107.066	92.2722	69.1706	60.9879	119.811	459.7	270.852	266.169	379.664	132.862	232.333	457.007	158.886	100.623	83.1751	108.825	118.144	79.0135	159.348	151.173	481.834	213.416	716.506	227.267
ENSSSCG00000037234	CLDN2	claudin 2	330.041	-1.17705	0.27578	-4.26809	1.9715e-05	0.000201599	321.613	299.281	252.991	528.51	206.164	789.211	654.464	464.294	356.567	546.91	142.763	152.47	146.84	268.242	168.876	104.205	205.141	381.144	425.607	39.8026	884.619	580.778	102.156	705.557	322.276	714.54	495.926	379.908	137.038	75.8237	210.16	324.854	298.087	185.024	31.9776	259.491	48.2081
ENSSSCG00000014187	NUDT12	nudix hydrolase 12	216.446	-1.17352	0.230618	-5.08857	3.60767e-07	6.97095e-06	97.682	86.5778	90.354	332.951	164.791	281.357	267.484	394.491	283.364	273.455	162.342	71.6837	70.9313	84.0414	94.0132	209.308	127.52	213.891	509.189	176.685	188.862	350.233	151.758	284.913	444.073	324.954	134.962	58.4474	99.42	113.735	95.305	283.285	168.206	539.654	189.085	444.104	145.389
ENSSSCG00000015492	DARS2	aspartyl-tRNA synthetase 2, mitochondrial	68.3987	-1.17126	0.282386	-4.14772	3.3581e-05	0.000316015	40.5472	63.0628	24.0944	82.2349	90.4596	108.154	120.414	71.9179	85.0093	61.4115	73.4211	20.4811	37.3323	40.2938	13.9279	56.5941	23.5635	144.738	37.3919	35.9195	136.999	123.612	40.7443	139.4	140.12	121.184	117.393	28.0997	14.7787	49.3735	57.8347	59.2744	105.395	44.3287	38.2341	51.64	31.3735
ENSSSCG00000017200	UNC13D	unc-13 homolog D	251.348	-1.17115	0.273372	-4.28408	1.83501e-05	0.000189316	94.9174	219.117	138.543	203.582	132.534	297.816	521.181	245.367	290.449	409.024	184.369	79.6486	59.7317	162.327	121.869	79.0521	213.458	141.522	537.783	185.422	255.404	336.498	125.776	273.908	665.031	103.231	187.669	125.887	52.397	62.5986	125.444	219.392	160.754	1331.79	221.758	569.331	165.285
ENSSSCG00000024800	DSC2	desmocollin 2	532.024	-1.1709	0.273853	-4.27564	1.90587e-05	0.000195695	124.406	258.665	782.064	750.143	396.199	828.398	526.696	703.315	427.408	881.776	299.395	146.781	133.152	513.459	287.263	468.923	145.539	701.176	896.305	237.845	775.02	1114.47	350.756	621.184	1228.74	1023.34	590.959	78.6792	155.848	248.631	307.094	789.042	610.014	1129.42	148.07	800.421	204.31
ENSSSCG00000030262		glycerophosphodiester phosphodiesterase domain containing 1	129.679	-1.1707	0.274034	-4.27211	1.93628e-05	0.000198466	49.7625	54.5119	84.3304	158.453	56.8002	139.503	95.5958	396.606	141.682	351.088	102.79	76.2351	36.0879	34.5376	24.3738	25.1529	6.93044	147.955	182.56	59.2186	104.706	244.28	67.3167	209.099	451.618	134.649	113.4	65.1913	63.1452	126.079	70.0533	100.074	99.0076	229.353	135.557	251.745	108.659
ENSSSCG00000011325	MYL3	myosin light chain 3	6.05975	-1.17031	0.41582	-2.81445	0.00488608	0.0192307	0	3.20658	2.00787	9.02579	1.40247	7.83725	3.67676	3.17285	3.14849	0	4.07895	3.41351	8.71087	1.15125	3.48197	3.59328	5.54436	3.2164	13.1971	9.70796	6.84993	6.86731	4.13348	6.11401	5.38923	6.28364	3.19437	3.37196	4.03054	6.17169	4.88744	17.7053	5.32299	28.91	5.56132	16.783	3.06083
ENSSSCG00000017367	MPP2	membrane palmitoylated protein 2	106.94	-1.16941	0.256726	-4.55508	5.23646e-06	6.63273e-05	19.3521	74.8203	27.1062	74.212	106.588	106.587	110.303	94.1279	82.648	140.204	110.132	38.6865	17.4217	33.3863	40.0427	55.6958	56.8296	107.75	48.3895	194.159	143.848	165.796	99.7941	194.426	215.569	157.091	151.733	64.0673	33.5878	78.4687	118.928	146.261	133.075	190.806	151.546	161.375	211.963
ENSSSCG00000009239		placenta-specific gene 8 protein	47.9564	-1.16846	0.293854	-3.97633	6.99866e-05	0.000582762	63.5854	114.368	39.1534	58.1662	63.1114	76.0213	60.6666	22.2099	10.2326	24.3329	2.44737	11.3784	28.6214	42.5963	47.0066	49.4076	16.6331	71.565	192.458	13.5911	129.17	4.90522	32.4774	103.938	18.3234	57.4504	64.686	31.4717	22.8397	44.9652	43.9869	90.8361	83.0386	7.70935	9.03714	5.164	16.8346
ENSSSCG00000021918	CEP19	centrosomal protein 19	15.6908	-1.16823	0.348012	-3.35687	0.000788292	0.00444419	11.9799	24.5838	3.0118	10.0287	24.5433	32.1327	14.707	20.0947	17.3167	9.26966	13.8684	2.27567	6.22205	4.60501	10.4459	10.7798	4.15827	29.7517	14.2969	4.85398	25.4426	24.5261	7.67647	44.0209	38.8025	19.7486	32.7423	13.4879	2.68703	15.8701	13.0332	11.547	17.0336	3.85467	13.9033	18.074	9.18249
ENSSSCG00000017738	ADAP2	ArfGAP with dual PH domains 2	71.4423	-1.16662	0.247571	-4.71226	2.44982e-06	3.51918e-05	79.2514	75.8892	28.1101	83.2378	79.2398	77.5888	71.6968	108.934	83.4351	141.362	66.079	14.7919	26.1326	47.2013	34.8197	20.6613	23.5635	69.9568	206.755	57.277	158.527	76.5215	70.8597	77.0366	113.174	53.8598	78.2621	46.0835	17.4657	35.2668	47.2452	63.8932	68.1342	106.003	62.5648	109.735	62.747
ENSSSCG00000010311	CAMK2G	calcium/calmodulin dependent protein kinase II gamma	223.192	-1.16479	0.177079	-6.57782	4.77409e-11	3.02353e-09	140.994	258.665	147.578	275.788	231.408	344.839	274.838	289.787	258.964	283.883	150.921	89.8891	92.0863	133.545	113.164	106.9	77.621	253.292	285.938	179.597	509.83	436.565	155.891	391.297	320.12	254.039	297.875	148.366	77.9238	112.854	178.391	264.04	238.47	264.045	167.535	290.475	160.694
ENSSSCG00000011798		DnaJ heat shock protein family (Hsp40) member B11	2883.66	-1.16355	0.208204	-5.5885	2.29046e-08	6.65767e-07	1388.74	4674.13	1599.27	4922.06	2363.87	3842.6	5361.64	1898.42	1119.29	1251.4	750.527	1729.51	1584.13	1981.31	5386.61	4789.84	3535.91	1543.87	6844.91	975.65	7842.19	2630.18	839.097	6625.15	1220.12	4672.34	3137.67	1527.5	2322.94	1744.83	1700.01	3853.61	5208.01	2434.23	1156.06	1116.72	1121.03
ENSSSCG00000002374	DLST	dihydrolipoamide S-succinyltransferase	232.107	-1.16284	0.441425	-2.63429	0.00843144	0.0298837	71.8792	262.94	62.2439	190.544	407.419	550.959	207.737	132.202	110.197	107.76	80.7632	77.3729	53.5096	63.3189	53.9705	157.206	59.6018	690.723	35.1923	25.2407	676.186	527.802	117.509	597.951	531.378	460.501	523.078	343.94	64.4887	203.666	318.498	227.09	353.446	15.4187	68.8213	87.7881	69.6339
ENSSSCG00000010456	PANK1	pantothenate kinase 1	954.974	-1.1587	0.260066	-4.45543	8.37269e-06	9.81035e-05	692.989	488.47	683.679	763.18	1143.72	1266.5	1119.57	1998.9	2221.26	1119.31	851.685	469.927	307.369	346.527	348.197	453.651	185.736	1221.43	1925.68	619.368	1621.48	1769.8	451.14	1792.63	2136.29	623.876	717.136	349.56	292.886	396.752	334.789	884.497	594.045	1697.98	921.788	1480.78	1041.45
ENSSSCG00000022636	DENND5B	DENN domain containing 5B	504.693	-1.15855	0.190633	-6.07736	1.22174e-09	5.287e-08	225.774	428.614	401.573	714.04	316.258	691.246	723.403	820.71	655.674	716.081	332.027	414.173	358.39	179.595	628.496	168.884	115.045	561.263	741.239	158.24	595.944	811.324	174.197	597.951	669.343	523.338	416.865	294.485	311.695	619.814	254.147	821.374	902.779	846.101	391.378	712.633	379.543
ENSSSCG00000012523		transcription elongation factor A like 8	1072.75	-1.158	0.205987	-5.62172	1.89061e-08	5.6565e-07	408.237	751.41	573.246	1135.24	627.607	1069.78	1173.81	1542	1034.28	2332.48	438.895	435.792	603.539	764.432	1189.09	593.789	530.872	545.181	2832.98	882.454	969.754	2350.58	385.595	1653.23	2225.75	1106.82	796.995	286.617	642.2	362.367	392.624	1319.43	792.061	3413.31	561.693	2314.76	652.722
ENSSSCG00000003854	ECHDC2	enoyl-CoA hydratase domain containing 2	1194.96	-1.15765	0.172185	-6.72332	1.77632e-11	1.30612e-09	618.345	829.437	898.52	1677.79	835.174	1144.24	1332.83	1867.75	1192.49	1872.47	1061.34	529.094	347.19	794.364	645.906	552.466	518.397	991.457	2367.79	749.455	1735.97	2121.02	568.059	1562.74	1937.97	1194.79	1218.65	505.795	540.093	816.427	573.459	1644.29	1374.4	3476.91	828.636	2456.78	831.016
ENSSSCG00000028896	DIO1	iodothyronine deiodinase 1	2385.72	-1.15674	0.239387	-4.8321	1.35101e-06	2.14298e-05	1002.62	3501.59	1301.1	2721.78	1869.5	3312.02	2480.89	2966.61	2346.41	2297.72	1618.53	2661.4	1499.51	1144.34	2836.06	310.818	440.776	2452.51	2875.87	1178.55	4044.39	2823.45	549.753	3691.64	2446.71	2956	3413.98	3001.05	2537.9	3314.2	1045.91	3958.3	5473.1	2808.13	1490.43	2379.31	1518.94
ENSSSCG00000013874	OCEL1	occludin/ELL domain containing 1	418.391	-1.15517	0.193742	-5.96241	2.48544e-09	9.847e-08	195.364	305.694	368.444	910.602	242.628	387.944	666.413	470.639	268.409	431.039	167.237	161.573	214.038	345.376	684.207	300.039	324.345	267.766	618.066	294.151	477.538	628.849	139.948	973.351	472.097	495.51	461.587	214.682	317.069	217.773	277.769	753.632	586.593	1002.21	193.256	447.977	196.658
ENSSSCG00000027515		Fc fragment of IgG binding protein	121.216	-1.15508	0.211391	-5.4642	4.64993e-08	1.22816e-06	70.0361	57.7185	66.2596	153.438	68.02	148.124	164.535	106.819	110.197	140.204	86.4738	32.9973	58.4872	74.8314	24.3738	56.5941	67.9184	136.697	130.872	117.466	147.763	227.602	49.0113	218.882	206.946	164.272	181.281	118.019	88.6719	92.5754	67.6095	257.882	163.948	198.516	118.873	179.449	131.616
ENSSSCG00000023710	REEP1	receptor accessory protein 1	56.7763	-1.15462	0.220689	-5.23186	1.67809e-07	3.66748e-06	40.5472	34.2036	33.1298	58.1662	23.8421	59.5631	75.3736	116.338	47.2274	100.808	26.1053	68.2702	24.8882	46.0501	62.6755	22.458	15.247	62.7199	105.577	39.8026	79.2635	102.029	32.4774	59.9173	142.276	60.1434	56.7001	8.99191	17.4657	9.69838	20.3643	70.8214	36.1963	156.114	30.5872	135.555	19.1302
ENSSSCG00000032043	SLC35D1	solute carrier family 35 member D1	440.721	-1.15414	0.272508	-4.23527	2.28278e-05	0.000227503	211.03	569.703	207.814	565.616	542.056	756.295	532.211	561.594	321.933	645.4	261.053	221.878	211.55	140.453	132.315	192.24	83.1653	696.352	333.228	109.7	534.294	904.523	366.109	727.568	1539.16	710.051	637.277	297.857	127.634	435.545	373.889	457.26	745.218	350.775	157.802	506.072	140.033
ENSSSCG00000000528	PKP2	plakophilin 2	98.1725	-1.15304	0.298949	-3.85699	0.000114792	0.000888882	51.6056	76.958	50.1967	79.2263	148.662	190.445	126.848	105.762	126.727	74.1573	91.3685	20.4811	47.2876	35.6888	19.1508	102.408	33.2661	162.428	87.9809	110.671	219.198	140.289	110.423	190.757	205.869	160.682	100.623	26.9757	25.5268	59.0719	87.9738	183.212	118.17	86.7301	54.918	83.9151	36.73
ENSSSCG00000026724	PLBD1	phospholipase B domain containing 1	78.7588	-1.15114	0.207256	-5.55418	2.78923e-08	7.91144e-07	26.7243	81.2335	18.0708	85.2435	70.825	115.991	110.303	151.239	76.351	108.918	88.9211	40.9621	38.5767	32.2351	50.4886	35.0345	22.1774	65.9363	79.1828	62.131	171.248	83.3888	67.9072	121.057	116.407	61.0411	65.4846	86.5471	51.0535	68.7703	56.2055	87.7569	129.881	177.315	53.5277	91.6611	64.2775
ENSSSCG00000001973	SCFD1	sec1 family domain containing 1	462.013	-1.15019	0.156975	-7.32727	2.34891e-13	2.99711e-11	256.185	554.739	169.665	1023.93	424.95	891.096	536.807	419.874	442.363	429.88	238.211	271.943	395.722	222.192	480.512	333.276	200.983	508.996	525.686	218.429	730.007	631.793	281.077	696.998	571.259	700.177	532.661	386.652	400.367	308.585	331.531	691.278	914.489	485.689	234.27	398.919	253.284
ENSSSCG00000007359	LPIN3	lipin 3	228.081	-1.15012	0.275137	-4.18019	2.91271e-05	0.000278481	102.29	95.1287	129.507	186.533	208.267	261.764	264.727	257.001	196.781	491.292	193.342	48.927	33.5991	79.4364	41.7836	106.9	166.331	239.622	249.646	149.503	333.689	585.683	115.147	613.847	333.055	162.477	236.383	113.523	61.8016	121.671	164.544	208.615	220.372	682.277	197.427	609.353	176.763
ENSSSCG00000016836	NADK2	NAD kinase 2, mitochondrial	2145.35	-1.14892	0.243544	-4.71752	2.38732e-06	3.44939e-05	852.414	1608.64	974.819	1654.73	3009.01	2873.92	3423.06	3833.86	10123.2	3118.08	3027.4	948.956	644.604	521.517	825.227	523.72	645.917	1464.27	2213.82	1702.78	1858.29	3803.51	1403.02	2912.72	4842.76	1366.24	1554.86	418.124	489.039	1081.81	654.102	1772.84	1526.63	3399.82	2766.06	2716.27	2822.09
ENSSSCG00000024108	SLC43A2	solute carrier family 43 member 2	2469.46	-1.14674	0.210807	-5.43974	5.33579e-08	1.38197e-06	879.138	2356.84	1832.18	2104.01	3023.73	2925.65	3514.06	2704.33	1450.67	2002.25	1062.16	999.021	1021.66	1930.65	2635.85	1358.26	1724.29	2684.89	3382.86	3308.47	4078.64	4053.68	757.608	5972.17	2703.24	4578.98	4202.99	1335.3	1512.8	1204.36	1454.83	3962.92	2615.72	4031.99	2091.06	1846.13	2066.83
ENSSSCG00000017068	FAXDC2	fatty acid hydroxylase domain containing 2	204.116	-1.14662	0.346972	-3.30466	0.000950932	0.00516965	22.1167	167.811	42.1652	151.433	53.294	169.285	171.889	190.371	29.1236	163.378	13.8684	244.635	399.455	74.8314	531	31.4412	48.5131	303.146	337.627	22.3283	413.931	372.797	14.1719	662.759	157.366	206.462	241.974	537.266	386.932	158.701	52.1327	368.733	176.723	306.446	58.3938	224.634	45.1473
ENSSSCG00000049407		chromobox 7	9.564	-1.14563	0.461563	-2.48207	0.0130623	0.0424469	9.21528	13.8952	0	18.0516	7.01237	10.9722	12.8687	3.17285	5.50986	5.79354	13.0526	4.55135	0	2.3025	0	9.88151	0	25.7312	2.19952	3.88319	14.6784	6.86731	15.9434	12.228	32.3354	8.97663	11.1803	12.3639	1.34351	9.69838	13.0332	13.8564	10.646	9.63668	6.25648	16.783	9.9477
ENSSSCG00000004388	ARMC2	armadillo repeat containing 2	16.8858	-1.14097	0.278858	-4.09158	4.28441e-05	0.000387226	5.52917	23.515	9.0354	10.0287	13.3235	24.2955	24.8181	14.8066	15.7425	44.0309	10.6053	9.1027	7.46646	6.90751	8.70493	11.6782	6.93044	15.2779	24.1947	18.4451	16.6355	31.3934	23.0294	45.2437	30.1797	21.5439	38.3324	5.61994	4.03054	9.69838	14.6623	16.9355	6.38759	11.564	12.513	14.201	18.365
ENSSSCG00000010791		fucose mutarotase	1178.82	-1.14026	0.203169	-5.61239	1.99554e-08	5.92955e-07	444.177	801.646	1126.41	2804.01	983.836	916.175	1310.77	1354.81	1194.07	2030.06	931.632	416.448	431.81	698.81	990.621	629.722	507.309	516.233	1431.89	1469.79	1236.9	1311.66	754.656	2081.21	1587.67	1638.23	1172.33	565.366	569.65	613.643	716.009	1694.32	1259.42	3133.85	1071.25	2183.08	1036.86
ENSSSCG00000010639	HABP2	hyaluronan binding protein 2	1062.58	-1.13732	0.241795	-4.70365	2.55556e-06	3.64392e-05	819.239	633.835	317.243	728.08	327.478	997.682	895.291	1551.52	939.038	1566.57	604.501	276.494	892.242	554.904	1359.71	296.445	306.326	1227.86	2000.46	443.654	1986.48	2227.95	245.647	1235.03	2052.22	1195.69	864.876	1298.21	1172.89	566.914	344.564	1562.69	1065.66	3286.11	560.303	2326.38	585.384
ENSSSCG00000032473	NYNRIN	NYN domain and retroviral integrase containing	192.497	-1.13447	0.266518	-4.25665	2.07516e-05	0.00020985	117.034	70.5449	21.0826	141.404	68.02	208.471	108.464	258.058	140.108	590.941	152.553	61.4432	55.9984	75.9827	43.5246	117.68	66.5323	148.759	233.149	73.7805	208.434	692.617	86.2127	376.623	620.839	252.243	176.489	64.0673	52.397	101.392	91.2321	174.744	74.5218	414.377	67.431	845.606	69.6339
ENSSSCG00000031860	MRPS12	mitochondrial ribosomal protein S12	644.737	-1.13436	0.204731	-5.54074	3.01204e-08	8.45761e-07	280.145	466.024	402.577	1001.86	817.643	924.796	1089.24	895.801	432.918	465.8	325.5	276.494	226.483	382.216	395.204	621.637	300.781	534.727	912.801	521.318	1184.06	845.66	340.127	1244.81	620.839	991.02	1110.04	509.167	335.878	375.592	584.049	1143.92	959.202	1123.64	367.742	482.834	362.708
ENSSSCG00000006561	SLC39A1	solute carrier family 39 member 1	889.955	-1.13397	0.354417	-3.19955	0.00137642	0.00696503	566.74	2232.85	414.625	939.685	1378.63	1831.57	1251.02	500.253	433.705	443.785	230.869	426.689	363.368	186.503	224.587	784.233	103.957	1800.38	580.674	81.5469	2294.73	1307.73	357.251	2640.03	916.169	1435.36	1607.57	1357.78	486.352	938.097	1263.4	1139.3	1538.34	310.301	139.728	286.602	133.911
ENSSSCG00000009931	MVK	mevalonate kinase	223.193	-1.13358	0.268764	-4.21777	2.46735e-05	0.000243272	61.7424	87.6467	40.1573	196.562	82.0448	152.043	217.848	286.614	162.935	397.437	137.869	87.6134	140.618	39.1426	55.7115	74.5605	60.9879	127.852	315.631	87.3717	410.996	433.622	48.4208	360.727	762.037	178.635	110.206	223.674	162.565	261.856	176.762	232.479	234.211	950.177	182.133	547.384	169.876
ENSSSCG00000017865	CTNS	cystinosin, lysosomal cystine transporter	224.49	-1.13173	0.198844	-5.69154	1.25897e-08	4.0086e-07	103.211	197.739	115.452	258.739	115.704	190.445	168.212	243.252	125.94	551.545	118.29	87.6134	151.818	82.8902	546.669	105.103	87.3236	144.738	270.541	222.312	266.169	310.01	119.281	276.353	398.803	274.685	154.927	291.113	124.947	158.701	100.192	449.562	217.178	427.869	161.973	542.22	144.624
ENSSSCG00000022351	GSTO1	glutathione S-transferase omega 1	6949.35	-1.13101	0.166895	-6.77678	1.22881e-11	9.43521e-10	1686.4	8463.25	4897.19	12638.1	5816.06	8557.5	10738	12679.8	3755.37	9437.67	3495.66	4828.98	5206.61	4415.05	5562.45	4619.16	3452.75	5023.22	14344.2	2653.19	11364	10390.2	2664.33	12179.1	8929.96	9601.4	8279.01	4799.43	4104.43	4834.2	4204.82	9790.28	10884.4	11159.3	1904.06	8099.74	1666.62
ENSSSCG00000017876	CYB5D2	neuferricin	89.28	-1.13095	0.256282	-4.41291	1.01992e-05	0.000115001	20.2736	44.8922	39.1534	110.315	89.0571	105.019	113.06	78.2636	82.648	143.68	84.0264	28.4459	41.0655	28.7813	29.5967	63.7807	59.6018	73.1732	108.876	66.0141	189.841	218.773	57.2783	280.022	158.443	98.7429	82.255	52.8274	34.9314	54.6636	78.199	99.3039	89.4262	127.204	72.9923	129.1	69.6339
ENSSSCG00000024926	ASGR1	asialoglycoprotein receptor 1	4711.52	-1.13084	0.209844	-5.38896	7.08665e-08	1.75929e-06	1174.95	4321.41	3124.24	5783.52	3300.02	3092.58	4367.07	9856.99	10148.4	10465.4	6842.03	2962.93	1769.55	2532.76	2750.76	1179.49	730.469	2355.21	5835.33	3332.74	5499.51	8087.73	2374.39	7148.51	9037.74	3208.25	3453.11	2217.63	1776.13	2218.28	1884.92	5285.43	4293.52	10631.2	6176.54	9403.65	5703.86
ENSSSCG00000047338		-	9.15681	-1.12967	0.370611	-3.04813	0.00230267	0.0104932	2.76458	7.48203	1.00393	3.0086	7.71361	6.2698	19.303	22.2099	8.65836	11.5871	17.1316	3.41351	2.48882	0	12.1869	4.4916	1.38609	9.64921	4.39904	3.88319	8.80705	9.81044	4.13348	9.78242	5.38923	8.97663	10.3817	15.7358	5.37406	9.69838	11.404	7.69797	12.7752	7.70935	9.7323	27.111	25.2519
ENSSSCG00000007314		erythrocyte membrane protein band 4.1 like 1	123.674	-1.12951	0.258781	-4.36472	1.27284e-05	0.000138393	44.2334	82.3023	39.1534	84.2407	126.924	177.122	136.959	108.934	100.752	162.219	123.184	26.1703	58.4872	34.5376	66.1574	91.6286	55.4436	388.381	94.5794	166.977	164.398	270.768	134.043	112.498	331.977	124.775	136.559	29.2237	45.6795	59.0719	93.6759	93.1455	99.0076	289.1	82.7246	241.417	99.477
ENSSSCG00000016613	AASS	aminoadipate-semialdehyde synthase	1648.61	-1.12849	0.23185	-4.86731	1.13127e-06	1.84155e-05	371.376	1218.5	1313.14	2838.11	885.663	2202.27	2622.45	1245.87	103.9	2738.03	145.211	1200.42	1055.26	1235.29	1707.91	1985.29	848.286	2159.01	3232.2	265.027	3363.31	3616.13	129.909	3102.25	3971.86	1476.66	1548.47	1074.53	1206.48	498.144	424.392	1353.3	2538	4336.51	71.602	2851.82	61.9818
ENSSSCG00000027439	HAO1	hydroxyacid oxidase 1	1251	-1.1283	0.388016	-2.90787	0.00363895	0.015096	254.342	516.26	466.829	1244.56	16.8297	779.807	668.251	2083.5	639.931	2524.82	323.053	303.802	1153.57	490.433	2033.47	706.079	148.312	1576.84	2197.32	163.094	1598.97	2919.59	194.274	716.562	3681.92	1640.03	640.471	1038.57	2378.02	1919.4	146.623	2930.62	940.04	3316.95	233.575	3441.81	258.64
ENSSSCG00000034987	IQANK1	IQ motif and ankyrin repeat containing 1	6.50361	-1.12829	0.382252	-2.95169	0.00316041	0.0134566	5.52917	9.61975	6.0236	14.0401	2.80495	10.9722	11.9495	12.6914	3.93562	10.4284	8.97369	9.1027	0	1.15125	0	5.38992	6.93044	12.0615	7.69833	0	6.84993	6.86731	5.31448	13.4508	14.012	8.07897	6.38874	1.12399	0	5.29002	2.44372	10.7772	2.1292	1.92734	4.86615	6.45501	5.35645
ENSSSCG00000037459	TCTA	T cell leukemia translocation altered	429.55	-1.12715	0.20661	-5.45545	4.88479e-08	1.27852e-06	186.149	231.943	138.543	452.292	295.922	378.539	534.05	827.056	461.254	736.938	385.869	197.984	223.994	183.049	289.004	144.629	121.976	193.788	857.813	223.283	558.758	926.106	238.561	701.889	932.337	370.735	302.667	350.684	239.145	228.353	170.246	502.678	260.826	1416.59	314.214	952.759	362.708
ENSSSCG00000027827	GALE	UDP-galactose-4-epimerase	2229.26	-1.12438	0.202905	-5.54143	3.0001e-08	8.43771e-07	574.112	1990.22	1629.38	4185.96	1863.89	2715.61	3956.2	2925.37	1616.75	1948.95	1176.37	1443.92	1295.43	1685.43	4319.38	1203.75	2196.95	1404.76	1972.97	2217.3	2483.59	2325.08	770.009	4021.8	1699.76	3230.69	3011.49	904.811	2105.29	1273.13	1363.59	3841.29	3620.7	4270.98	1689.25	1995.89	1552.61
ENSSSCG00000016830	PRLR	prolactin receptor	413.827	-1.12419	0.249296	-4.50946	6.49937e-06	7.90354e-05	208.265	200.946	153.602	671.92	121.314	390.295	349.292	507.656	292.81	534.164	240.658	185.467	414.388	348.829	626.755	122.171	91.4819	443.864	376.118	158.24	346.411	759.328	74.4027	443.877	1002.4	490.124	276.313	479.943	454.108	313.875	107.524	847.547	1069.92	828.755	373.999	663.575	341.283
ENSSSCG00000005240	DOCK8	dedicator of cytokinesis 8	259.551	-1.12252	0.185331	-6.05686	1.38806e-09	5.93276e-08	192.599	195.602	124.488	221.633	197.048	459.263	313.444	355.359	159.786	286.201	135.421	154.746	138.129	117.428	205.436	150.918	94.2541	487.285	254.045	71.8389	616.494	661.224	152.939	325.266	479.642	281.866	315.444	178.714	145.1	208.074	112.411	364.884	255.503	533.872	114.702	446.686	95.651
ENSSSCG00000000171	CKAP4	cytoskeleton associated protein 4	913.732	-1.12093	0.369528	-3.03342	0.00241796	0.0109072	586.092	1841.65	225.885	1741.98	1084.11	2047.09	1474.38	175.564	176.316	199.298	165.605	615.57	695.625	259.032	297.708	918.981	199.597	1449.79	365.121	26.2115	2792.81	1039.91	222.027	2143.57	368.623	1546.67	1667.46	1824.23	784.612	1134.71	1203.94	1524.97	2571	134.914	93.8472	105.862	103.303
ENSSSCG00000006621		cingulin	717.175	-1.12075	0.246977	-4.53788	5.68226e-06	7.1139e-05	427.589	784.544	309.212	491.404	613.583	866.8	828.191	919.069	572.239	1304.7	491.921	384.589	245.149	577.929	146.243	579.416	268.901	1425.67	864.412	204.838	1604.84	1499.04	193.093	1710.7	1530.54	777.376	1094.87	450.719	241.833	531.647	360.041	806.748	749.477	761.298	312.824	1274.22	329.805
ENSSSCG00000042393		-	58.9265	-1.12058	0.332375	-3.37144	0.000747767	0.00425303	24.8813	50.2365	24.0944	60.1719	88.3559	77.5888	85.4847	56.0537	64.5441	63.7289	33.4474	23.8946	24.8882	28.7813	8.70493	53.0008	5.54436	85.2347	21.9952	11.6496	160.484	97.1234	17.7149	127.171	114.252	122.98	102.22	43.8355	40.3054	59.9536	43.9869	82.3683	78.7802	107.931	18.0743	55.513	15.3042
ENSSSCG00000009140	CASP6	caspase 6	1111.72	-1.11967	0.175473	-6.38085	1.76113e-10	9.71093e-09	547.388	1157.58	598.344	1311.75	1196.31	1376.22	1424.75	1793.72	1194.85	1791.36	563.711	537.059	594.828	621.676	736.437	951.32	350.681	1209.37	2823.09	497.048	1560.81	1849.27	671.986	2124.01	1375.33	1296.23	1358.41	623.813	619.36	688.585	606.857	1228.6	1272.19	1672.93	690.994	1572.44	644.305
ENSSSCG00000005662	SPOUT1	SPOUT domain containing methyltransferase 1	149.896	-1.11962	0.218326	-5.12818	2.92553e-07	5.88941e-06	49.7625	211.635	55.2163	180.516	148.662	221.011	266.565	89.8974	59.8214	147.156	74.2369	93.3026	97.0639	49.5038	109.682	114.985	156.628	240.426	163.864	91.2549	409.039	178.55	48.4208	409.639	122.874	141.831	241.175	184.334	73.8933	139.304	131.961	160.118	219.307	185.024	59.089	169.121	51.2689
ENSSSCG00000012875		two pore segment channel 2	196.485	-1.11779	0.280435	-3.98592	6.72205e-05	0.000563516	115.191	330.278	230.905	161.461	323.972	444.372	236.232	180.852	165.296	399.754	170.5	62.581	43.5543	81.7389	34.8197	110.493	62.374	298.322	118.774	137.853	374.789	262.92	99.2036	361.95	224.192	240.574	401.692	109.027	47.023	129.606	205.272	217.083	150.108	169.606	175.877	243.999	147.685
ENSSSCG00000044952	NLRX1	NLR family member X1	111.427	-1.11779	0.252052	-4.43475	9.21811e-06	0.000105795	43.3118	94.0598	22.0865	125.358	107.991	120.694	155.343	95.1855	88.9449	121.664	101.974	17.0676	44.7987	54.1089	55.7115	117.68	54.0575	172.882	106.677	109.7	242.683	162.853	119.281	270.239	196.168	163.375	203.641	97.787	56.4276	75.8237	107.524	118.549	107.524	173.46	48.6615	96.8251	72.6947
ENSSSCG00000009753	TMEM132C	transmembrane protein 132C	17.6191	-1.11769	0.321764	-3.47362	0.000513494	0.00308327	11.0583	6.41317	3.0118	31.0888	9.81732	15.6745	11.0303	26.4404	22.8266	33.6025	16.3158	3.41351	2.48882	17.2688	10.4459	8.08487	18.0192	12.0615	31.8931	32.0363	32.2925	34.3366	22.4389	46.4665	21.5569	9.87429	18.3676	4.49595	6.71757	3.52668	7.33115	10.0074	6.38759	38.5467	29.8921	16.783	19.8954
ENSSSCG00000044342		-	9.71351	-1.11683	0.447032	-2.49833	0.012478	0.0409553	7.37223	18.1706	7.02753	9.02579	3.50619	6.2698	8.27271	17.9795	7.87123	9.26966	3.26316	5.68918	8.71087	1.15125	1.74099	19.763	2.77218	8.04101	31.8931	0	22.5069	19.6209	4.72398	33.0157	18.3234	6.28364	3.19437	4.49595	1.34351	1.76334	1.62915	12.3168	3.19379	26.9827	2.08549	19.365	0.765208
ENSSSCG00000016328	RAB17	RAB17, member RAS oncogene family	370.98	-1.1157	0.232498	-4.79876	1.59653e-06	2.48919e-05	113.348	177.431	193.759	314.9	138.845	309.571	284.03	537.269	497.462	640.765	237.395	98.9918	192.883	231.402	503.145	210.207	350.681	249.271	806.125	344.633	641.936	666.129	190.731	472.002	766.349	320.466	198.85	152.862	237.802	197.494	172.689	768.258	343.865	1150.62	184.914	670.03	159.163
ENSSSCG00000032019	DNASE1L3	deoxyribonuclease 1 like 3	31.8526	-1.11369	0.336112	-3.31347	0.000921476	0.00503793	43.3118	30.997	18.0708	43.1232	11.921	45.4561	17.4646	47.5927	34.6334	79.9508	12.2369	3.41351	18.6661	16.1175	13.9279	11.6782	12.4748	21.7107	43.9904	110.671	43.0567	27.4692	32.4774	55.0261	46.3474	12.5673	9.58311	8.99191	10.7481	21.1601	11.404	55.4254	43.6485	48.1834	27.1114	58.095	29.8431
ENSSSCG00000016230	EPHA4	EPH receptor A4	11.6663	-1.11353	0.352348	-3.16031	0.00157604	0.00776078	8.29375	11.7575	15.059	24.0688	11.921	14.1071	6.43433	12.6914	7.08411	22.0154	6.52632	6.82702	8.71087	1.15125	3.48197	7.18655	2.77218	16.082	4.39904	8.73717	20.5498	15.6967	2.95249	17.1192	31.2575	12.5673	24.7564	5.61994	5.37406	0.88167	10.5894	8.46777	31.9379	7.70935	9.03714	23.238	4.59125
ENSSSCG00000035928	CLDN3	claudin 3	285.184	-1.11117	0.255782	-4.34421	1.39781e-05	0.000149992	149.288	193.464	137.539	278.797	297.325	356.595	515.666	265.462	258.176	390.484	168.053	100.13	103.286	184.2	87.0493	237.156	116.431	161.624	462.999	147.561	605.729	562.138	122.824	888.978	480.719	287.252	273.119	146.118	147.787	240.696	270.438	410.302	409.87	506.889	164.059	311.131	112.486
ENSSSCG00000030228	PIWIL2	piwi like RNA-mediated gene silencing 2	43.1467	-1.10944	0.263493	-4.21051	2.54794e-05	0.00024994	10.1368	25.6527	29.1141	44.1261	21.7384	37.6188	32.1717	54.9961	18.1038	10.4284	13.0526	20.4811	27.377	20.7225	55.7115	30.5429	26.3357	94.0798	43.9904	1.94159	73.3921	34.3366	10.0385	88.0418	25.8683	68.2224	68.679	78.6792	37.6184	52.0186	52.9472	73.9005	107.524	117.568	9.03714	74.8781	5.35645
ENSSSCG00000023915	SLC2A4	solute carrier family 2 member 4	91.6814	-1.10926	0.332149	-3.33963	0.000838906	0.00467336	46.0764	185.982	89.3501	180.516	49.7878	110.505	113.98	56.0537	49.5888	135.569	70.9737	104.681	31.1102	134.697	26.1148	17.9664	76.2349	102.925	78.083	76.6929	350.325	70.6352	15.3529	189.534	49.5809	82.585	148.538	38.2156	25.5268	104.037	30.9538	79.2891	152.237	138.768	19.4646	134.264	26.0171
ENSSSCG00000024205	ARHGEF26	Rho guanine nucleotide exchange factor 26	60.5247	-1.10584	0.353406	-3.12908	0.00175353	0.0084408	32.2535	75.8892	9.0354	25.0716	79.941	49.3747	56.0706	52.8808	97.6033	41.7135	47.3158	46.6513	33.5991	21.8738	36.5607	24.2546	4.15827	102.121	101.178	48.5398	84.1563	205.038	20.0769	132.063	141.198	64.6317	27.9507	67.4393	5.37406	36.1485	17.106	89.2965	57.4883	88.6575	78.5536	76.1691	61.9818
ENSSSCG00000035414	XXYLT1	xyloside xylosyltransferase 1	54.7994	-1.10407	0.204466	-5.39978	6.6722e-08	1.66834e-06	19.3521	35.2724	18.0708	59.169	58.2027	68.1841	90.9998	74.0332	55.8858	68.3637	39.9737	30.7216	33.5991	11.5125	29.5967	26.9496	23.5635	73.1732	76.9833	60.1894	73.3921	95.1613	33.6584	111.275	108.862	76.3014	65.4846	40.4636	36.2749	34.3851	41.5432	56.1952	58.5529	96.3668	43.1002	60.677	42.0864
ENSSSCG00000012676	MBNL3	muscleblind like splicing regulator 3	1057.37	-1.10407	0.263749	-4.18606	2.8384e-05	0.000272578	357.553	1731.56	662.596	2139.11	521.019	1362.9	1262.97	1592.77	970.523	1282.69	811.711	497.235	593.583	866.893	2611.48	546.178	318.8	982.612	577.374	213.575	501.023	1978.77	239.742	1386.66	2213.9	1062.83	1267.37	1091.39	1250.81	989.234	611.744	1714.34	2309.11	861.519	275.98	1205.79	259.405
ENSSSCG00000014258	ISOC1	isochorismatase domain containing 1	760.167	-1.10356	0.16365	-6.7434	1.54721e-11	1.15727e-09	370.454	755.685	458.798	1593.55	773.465	1037.65	1342.94	1028	446.299	480.864	340.185	476.754	347.19	590.592	1169.94	867.776	410.282	1342.85	929.298	208.721	1196.78	1172.35	453.502	1461.25	1021.8	1240.57	1177.13	427.116	523.97	320.046	506.664	765.948	907.037	909.703	239.832	560.294	270.884
ENSSSCG00000004679	SORD	sorbitol dehydrogenase	11337.7	-1.10312	0.201947	-5.46242	4.69696e-08	1.2387e-06	4444.53	8145.79	6226.4	25440.7	4878.51	11586.6	12778.6	15140.8	3272.07	16475.7	2938.48	9627.24	6508.26	13960.1	17246.2	7171.28	5006.55	6929.74	18775.1	2835.7	12193.9	15859.6	1345.74	19855.9	13465.5	16791.7	14471.3	11610.8	10079	6598.42	4888.25	23948.4	15310	30295.8	2637.45	17915.2	2839.69
ENSSSCG00000022333	C16orf87	UPF0547 protein C16orf87 homolog	134.425	-1.10073	0.195273	-5.63688	1.73154e-08	5.25304e-07	53.4486	147.503	98.3855	186.533	117.107	235.901	200.384	213.639	151.128	159.902	46.5	61.4432	90.8419	59.8651	106.2	88.0353	41.5827	154.387	183.66	53.3938	201.584	284.503	109.833	275.131	250.06	149.91	168.503	74.1832	88.6719	94.3387	111.596	179.363	161.819	146.478	47.9664	135.555	44.382
ENSSSCG00000037612	LIN28B	lin-28 homolog B	27.4826	-1.1001	0.370547	-2.96886	0.00298902	0.0128578	12.9014	49.1676	21.0826	27.0774	41.373	82.2911	24.8181	13.749	7.08411	4.63483	17.9474	30.7216	22.3994	8.05877	57.4525	5.38992	22.1774	152.779	7.69833	7.76637	45.9924	40.2228	11.2195	33.0157	33.4132	38.5995	38.3324	5.61994	33.5878	22.0418	11.404	19.2449	38.3255	3.85467	6.95165	7.74601	10.7129
ENSSSCG00000040203		glycine cleavage system protein H	697.152	-1.1001	0.237821	-4.62574	3.73271e-06	5.03293e-05	257.106	426.476	481.888	1207.45	302.934	737.485	1012.95	1061.85	515.566	549.227	323.869	506.337	340.968	714.928	1516.4	400.65	626.512	377.928	1221.83	510.639	647.808	1045.79	273.991	846.18	675.81	839.315	513.495	227.046	593.833	309.466	269.624	1150.08	995.399	2623.1	333.679	992.78	364.239
ENSSSCG00000015125	NECTIN1	nectin cell adhesion molecule 1	503.412	-1.09986	0.195681	-5.62069	1.90198e-08	5.67574e-07	166.797	376.239	451.77	527.507	214.579	540.77	534.969	501.31	436.853	638.448	275.737	248.048	246.393	523.82	470.066	171.579	221.774	525.882	581.773	333.954	1085.22	1124.28	194.274	904.874	1076.77	768.399	598.146	365.296	288.855	461.995	178.391	736.696	595.11	1011.85	295.445	690.686	261.701
ENSSSCG00000040773	TOB1	transducer of ERBB2, 1	274.168	-1.09878	0.347386	-3.163	0.00156155	0.00769598	214.716	173.156	75.295	242.693	133.936	383.242	232.555	290.845	102.326	456.531	52.2106	106.957	248.882	99.0077	99.2362	178.766	33.2661	538.748	419.009	25.2407	536.252	1031.08	109.833	528.251	602.516	492.817	298.674	430.488	260.642	154.292	121.371	244.796	731.378	194.661	13.9033	269.819	16.8346
ENSSSCG00000003434	MFN2	mitofusin 2	425.65	-1.09689	0.210492	-5.21105	1.87776e-07	4.01785e-06	240.519	405.099	216.85	453.295	490.866	796.265	553.353	417.759	358.928	486.657	253.711	152.47	148.085	242.914	193.249	383.582	156.628	748.618	387.116	197.072	883.641	694.579	253.914	913.434	657.486	628.364	624.499	363.048	202.871	304.176	424.392	496.519	556.784	439.433	266.248	533.183	223.441
ENSSSCG00000001073	TPMT	thiopurine S-methyltransferase	244.683	-1.09461	0.240892	-4.54398	5.52013e-06	6.93634e-05	44.2334	160.329	155.61	422.206	248.939	301.734	379.626	326.803	226.692	201.615	124	158.159	205.328	101.31	224.587	172.477	256.426	193.788	566.377	223.283	252.469	391.437	161.206	516.023	254.372	300.717	281.903	75.3072	126.29	58.1903	113.226	218.622	243.793	543.509	158.498	544.802	119.372
ENSSSCG00000004465	BCKDHB	branched chain keto acid dehydrogenase E1 subunit beta	718.267	-1.09341	0.21898	-4.9932	5.9388e-07	1.06243e-05	226.696	429.682	270.058	866.476	602.363	664.599	792.342	1213.09	421.898	945.505	292.053	376.624	378.3	367.249	781.702	462.634	650.076	663.383	2081.85	356.282	1130.24	1188.04	115.147	1072.4	1033.65	541.291	522.28	433.859	442.016	504.316	285.1	745.934	1075.24	2374.48	271.114	1658.94	338.987
ENSSSCG00000029967	PEX1	peroxisomal biogenesis factor 1	106.876	-1.09332	0.178429	-6.1275	8.92734e-10	4.01337e-08	54.3702	92.991	46.1809	133.381	98.1732	118.343	152.586	169.219	140.895	192.345	87.2896	55.754	44.7987	40.2938	43.5246	72.7639	37.4244	118.203	126.472	52.423	176.141	266.844	87.3936	178.529	217.725	117.594	109.407	42.7116	40.3054	62.5986	59.4638	92.3757	99.0076	154.187	82.0294	202.687	87.9989
ENSSSCG00000017198	ACOX1	acyl-CoA oxidase 1	3333.73	-1.09083	0.227981	-4.78476	1.71194e-06	2.6477e-05	1180.48	1694.15	1893.42	5492.69	1952.95	3440.55	3545.32	3837.03	2439.3	8081.98	1916.29	1181.07	984.328	4071.98	1974.28	3578.9	2079.13	3874.96	4910.43	2533.78	3407.35	5610.59	1072.93	4795.83	8655.11	4399.45	3374.85	1054.3	802.078	1187.61	1720.38	3644.99	5542.29	6701.35	1716.36	7345.8	1653.61
ENSSSCG00000010495	ALDH18A1	aldehyde dehydrogenase 18 family member A1	2815.99	-1.09057	0.134544	-8.10567	5.24575e-16	1.31927e-13	1408.1	3002.43	1704.68	3719.63	1438.94	3711.72	3198.78	3419.27	2274	2658.07	1625.87	2474.8	2055.76	1810.92	4803.38	1282.8	1442.92	3778.47	3432.35	1690.16	4125.61	4867.94	1003.85	4360.51	3626.95	4082.57	3765.36	2153.56	2756.89	2316.15	1304.95	3695.8	4033.76	4012.71	2253.72	2589.75	2308.63
ENSSSCG00000014316	TGFBI	transforming growth factor beta induced	664.205	-1.08963	0.185169	-5.88453	3.99194e-09	1.48334e-07	225.774	366.62	222.873	486.39	337.996	434.184	366.757	1700.65	961.865	2418.22	483.764	361.832	190.395	185.352	454.397	309.022	115.045	348.98	626.864	768.871	671.293	1531.41	958.968	1018.59	2327.07	528.723	764.253	191.078	225.71	211.601	288.359	596.593	368.351	1526.45	391.378	1147.7	462.185
ENSSSCG00000004402	METTL24	methyltransferase like 24	15.4237	-1.0888	0.365897	-2.9757	0.00292321	0.0126374	11.0583	14.9641	8.03147	1.00287	9.81732	15.6745	19.303	28.5556	22.8266	34.7612	22.0263	0	8.71087	2.3025	8.70493	1.79664	1.38609	12.8656	40.6912	21.3575	22.5069	17.6588	16.5339	11.0052	38.8025	4.48831	9.58311	15.7358	4.03054	8.8167	12.2186	9.23757	10.646	28.91	17.3791	33.566	23.7214
ENSSSCG00000007079	FLRT3	fibronectin leucine rich transmembrane protein 3	35.9961	-1.0874	0.248531	-4.37531	1.21258e-05	0.000133092	70.9577	39.5479	20.0787	47.1347	37.8668	62.698	87.3231	47.5927	49.5888	52.1418	53.0264	9.1027	13.6885	8.05877	6.96394	19.763	15.247	64.3281	43.9904	36.8903	47.9495	40.2228	37.2014	34.2385	47.4252	41.2925	51.1099	8.99191	9.4046	25.5684	17.106	42.3389	19.1628	28.91	26.4163	34.857	33.6691
ENSSSCG00000007289	TRPC4AP	transient receptor potential cation channel subfamily C member 4 associated protein	304.566	-1.0866	0.36774	-2.9548	0.00312874	0.0133398	222.088	357	136.535	409.169	267.171	571.336	435.696	175.564	127.514	206.25	163.158	179.778	98.3084	100.159	80.0853	200.325	62.374	606.292	41.7909	33.9779	808.292	603.342	174.787	657.868	592.815	656.192	539.05	548.506	153.161	380	384.478	414.151	469.487	73.2388	92.4569	139.428	107.129
ENSSSCG00000013232	MTCH2	mitochondrial carrier 2	1931.03	-1.08638	0.159829	-6.79714	1.06714e-11	8.3771e-10	692.989	1248.43	1144.48	2760.89	1847.06	2325.31	2726.32	3422.45	1836.36	1951.26	1061.34	882.961	664.515	1327.39	1793.21	1610.69	1113.03	2044.83	3225.6	1587.25	2713.55	3470.93	1087.11	3212.3	3153.78	2593.35	2420.53	1075.66	940.46	1087.98	1208.01	2422.55	2189.88	3758.31	1280.49	2281.2	1285.55
ENSSSCG00000003834	C8B	complement C8 beta chain	3580.58	-1.08624	0.267954	-4.05383	5.03867e-05	0.000444741	1452.33	3216.2	1546.06	2775.93	894.077	2432.68	2343.94	7990.29	2499.12	9122.5	1150.26	2164.17	2396.73	2227.67	4338.54	577.619	1262.73	1814.86	9319.37	990.212	5085.58	9558.32	415.12	3785.8	8977.38	1996.4	1851.94	2481.77	2818.69	1870.02	632.923	3165.41	3603.66	13504.8	1213.06	9792.24	1212.85
ENSSSCG00000017215	SLC16A5	solute carrier family 16 member 5	627.11	-1.08516	0.272271	-3.9856	6.73103e-05	0.000563906	209.187	737.515	387.518	543.553	804.319	952.226	837.382	382.857	390.413	1203.9	392.395	187.743	111.997	284.359	149.725	446.465	382.561	653.734	465.199	438.8	1003.03	1011.46	816.068	1220.36	1261.08	879.71	958.311	233.79	190.779	476.984	739.632	816.755	866.582	894.284	583.938	788.802	499.681
ENSSSCG00000007291	EDEM2	ER degradation enhancing alpha-mannosidase like protein 2	501.766	-1.0819	0.188132	-5.75075	8.88495e-09	2.95365e-07	231.304	685.14	299.172	801.289	538.55	709.271	731.676	325.746	313.275	431.039	192.526	219.603	222.749	307.384	363.866	493.177	508.695	461.554	660.956	255.319	1313.23	688.693	209.036	1324.3	449.462	709.154	564.605	356.304	353.344	431.137	412.988	747.473	903.843	535.799	221.758	327.914	263.997
ENSSSCG00000035875	OS9	OS9 endoplasmic reticulum lectin	964.353	-1.0802	0.348389	-3.10056	0.00193156	0.00911074	551.995	1156.51	297.164	788.252	1193.51	1294.71	944.009	968.777	547.838	1200.42	286.342	372.073	321.058	201.469	228.069	739.317	126.134	1682.98	887.507	133.97	2785.96	1877.72	412.758	2622.91	1819.4	1310.59	1491.77	1913.03	343.94	1082.69	1371.74	1522.66	1371.2	755.516	194.646	663.575	218.849
ENSSSCG00000038350	KISS1	KiSS-1 metastasis suppressor	397.733	-1.0797	0.228902	-4.71688	2.3949e-06	3.45747e-05	129.935	168.88	260.019	411.175	234.914	217.092	361.242	604.957	450.235	741.573	316.527	154.746	161.773	234.855	252.443	148.223	121.976	286.26	886.407	172.802	540.166	773.063	203.722	820.501	635.929	361.758	334.61	361.924	149.13	387.935	264.736	538.858	378.997	1279.75	339.935	726.834	302.257
ENSSSCG00000003086		apolipoprotein C2	27422.6	-1.07913	0.255418	-4.22495	2.38993e-05	0.00023631	5580.77	12387	12761	22453.1	5379.89	11668.1	19306.7	55805.1	15873.9	55809.1	12791.6	21307.1	19214.9	15645.5	49163.7	5871.41	12613.4	13188.9	46604.6	16268.6	31612.4	54282.2	5430.81	34587	60733.4	23065.4	19762	9613.47	26288.5	11665.4	4834.49	30895.8	20491.4	140169	19526.5	74355.2	17628.9
ENSSSCG00000047429		-	33.416	-1.07722	0.305595	-3.52499	0.000423494	0.0026293	13.8229	36.3413	26.1023	45.1289	25.2445	43.1049	47.7979	2.11523	8.65836	9.26966	31.8158	13.654	13.6885	24.1763	22.6328	19.763	58.2157	42.6174	91.2801	21.3575	60.6708	6.86731	9.44796	103.938	5.38923	26.0322	55.1029	32.5957	14.7787	44.0835	61.9075	72.3609	91.5554	26.9827	5.56132	11.619	10.7129
ENSSSCG00000011361	SLC26A6	solute carrier family 26 member 6	178.097	-1.07643	0.258886	-4.15795	3.2112e-05	0.000303343	70.0361	106.886	83.3265	238.682	55.3977	157.529	284.03	282.384	44.0789	200.456	48.1316	136.54	133.152	140.453	222.846	70.0689	177.419	82.0183	328.828	81.5469	300.418	273.711	38.3823	294.695	270.539	142.728	146.142	84.2991	94.046	76.7053	52.1327	167.816	142.656	1191.09	51.4422	285.311	33.6691
ENSSSCG00000038383	DYNC2LI1	dynein cytoplasmic 2 light intermediate chain 1	107.203	-1.07609	0.256932	-4.18822	2.81155e-05	0.000270598	70.9577	121.85	227.893	172.493	86.9534	148.908	339.181	186.14	217.246	186.552	116.658	27.3081	37.3323	36.8401	27.8558	57.4924	38.8105	76.3896	84.6816	23.2991	123.299	189.342	50.1923	129.617	255.45	119.389	55.1029	33.7196	32.2443	47.6102	39.0995	105.462	124.558	94.4395	82.7246	121.354	78.0512
ENSSSCG00000011181	NEK11	NIMA related kinase 11	10.8704	-1.07581	0.384743	-2.79619	0.00517089	0.0200739	2.76458	6.41317	5.01967	26.0745	20.3359	14.1071	27.5757	13.749	19.6781	16.2219	7.34211	5.68918	1.24441	8.05877	5.22296	9.88151	1.38609	12.0615	17.5962	13.5911	2.93568	4.90522	9.44796	13.4508	21.5569	17.9533	10.3817	6.74393	1.34351	2.64501	6.51658	8.46777	11.7106	7.70935	2.78066	29.693	9.9477
ENSSSCG00000000133	TST	thiosulfate sulfurtransferase	6283.67	-1.07568	0.252425	-4.26137	2.03176e-05	0.000206036	1518.68	2881.65	2370.29	5782.52	3893.27	4263.46	4187.83	10637.5	5311.51	13153.6	4211.92	2382.63	1622.71	2512.03	4211.44	1831.67	5043.98	2536.94	15235	9874.94	5751	12226.8	2340.14	6682.62	12445.9	2990.12	3612.83	2070.39	1984.37	2568.31	2724.75	6130.67	5258.05	34194.8	4747.97	18444.5	4859.07
ENSSSCG00000016541	SLC35B4	solute carrier family 35 member B4	234.947	-1.07505	0.117116	-9.17937	4.33633e-20	2.68744e-17	126.249	375.17	164.645	473.352	180.218	352.676	322.636	191.429	128.301	155.267	124.816	169.538	133.152	248.67	290.745	200.325	188.508	302.342	313.432	132.999	344.454	318.839	116.919	394.965	184.312	424.595	380.13	119.143	210.932	125.197	161.285	344.099	350.253	202.37	118.873	193.65	128.555
ENSSSCG00000016017	DNAJC10	DnaJ heat shock protein family (Hsp40) member C10	711.538	-1.0742	0.170654	-6.29459	3.08218e-10	1.57773e-08	502.233	1331.8	414.625	660.888	645.138	1018.84	1260.21	673.702	861.9	455.372	413.606	425.551	342.213	391.426	981.916	683.621	525.328	636.044	1118.46	399.968	1723.25	1190.01	537.353	1434.35	699.522	1107.72	814.565	319.213	495.757	436.427	498.518	726.689	900.649	497.253	399.024	402.792	400.969
ENSSSCG00000005440		actin binding transcription modulator	301.368	-1.07404	0.173876	-6.17705	6.53108e-10	3.06307e-08	199.972	278.973	190.747	518.481	347.814	429.481	397.09	276.038	204.652	319.803	208.027	124.024	111.997	196.864	266.371	247.038	119.204	323.249	412.41	145.619	454.052	393.399	199.588	416.976	351.378	496.408	376.137	312.469	130.321	186.914	372.26	509.606	700.505	339.211	178.657	263.364	151.511
ENSSSCG00000015973	ATP5MC3	ATP synthase membrane subunit c locus 3	1459.3	-1.07347	0.215583	-4.97936	6.37937e-07	1.1296e-05	669.951	1579.78	501.967	2046.85	1998.53	2103.52	1777.71	2741.34	1260.18	1760.08	878.606	849.964	615.983	777.095	649.387	1246.87	282.762	1637.15	1908.09	575.682	2590.25	2743	830.83	2728.07	2619.17	2102.33	2035.61	916.05	654.291	856.984	1241.41	1569.62	1633.09	2503.61	908.58	1479.49	720.06
ENSSSCG00000009815	CAMKK2	calcium/calmodulin dependent protein kinase kinase 2	207.583	-1.07279	0.180376	-5.94753	2.7222e-09	1.06633e-07	93.9959	115.437	89.3501	240.688	127.625	206.12	239.909	269.692	213.31	425.246	225.158	133.127	58.4872	122.033	80.0853	130.256	81.7793	205.046	228.75	282.502	246.597	288.427	233.837	287.359	436.528	195.691	198.85	55.0754	55.0841	115.499	109.153	239.407	201.209	483.761	193.256	601.606	170.641
ENSSSCG00000005619	TOR2A	torsin family 2 member A	81.293	-1.07212	0.278063	-3.85566	0.000115419	0.00089254	74.6438	87.6467	48.1888	71.2034	83.4472	83.8586	175.565	53.9384	73.9896	113.553	53.8422	22.7567	14.9329	50.6551	31.3377	86.2386	29.1079	67.5445	45.0902	25.2407	135.041	88.294	56.0973	248.229	79.7606	152.603	108.609	78.6792	38.9619	53.7819	109.153	120.088	163.948	125.277	38.2341	80.0421	38.2604
ENSSSCG00000024070		cyclin dependent kinase 5	82.826	-1.06947	0.290279	-3.68429	0.000229337	0.0015906	42.3903	36.3413	26.1023	109.312	94.667	105.019	119.495	77.206	107.049	62.5702	80.7632	21.6189	32.3546	56.4114	17.4099	88.0353	67.9184	57.0912	196.857	89.3133	150.698	119.687	68.4977	193.203	90.5391	95.1523	87.0466	24.7277	32.2443	33.5035	40.7286	80.8287	68.1342	233.208	57.6987	147.174	53.5645
ENSSSCG00000035561		SLX1 homolog A, structure-specific endonuclease subunit	240.813	-1.06944	0.155492	-6.87778	6.07916e-12	5.14593e-10	169.561	288.593	134.527	421.203	208.267	308.788	314.363	285.556	171.593	326.755	110.132	98.9918	185.417	130.092	215.882	160.799	102.571	170.469	377.218	135.911	421.76	384.569	81.4887	483.007	362.156	253.141	285.098	167.474	145.1	180.742	188.166	339.481	337.477	472.197	95.9327	313.713	81.8772
ENSSSCG00000009145	OSTC	oligosaccharyltransferase complex non-catalytic subunit	2716.36	-1.06884	0.204935	-5.2155	1.83322e-07	3.94689e-06	1439.43	4770.33	1960.68	4888.97	2858.94	4591.06	3708.93	2353.2	1592.35	1767.03	725.237	1614.59	1703.6	1786.74	2773.39	2687.77	706.905	3344.26	3689.7	392.202	5502.45	3894.75	967.826	6225.29	2461.8	4071.8	3577.7	2831.33	2629.26	2925.38	2114.63	4317.02	5180.33	1719.18	762.596	1172.23	796.581
ENSSSCG00000026499	NMT2	N-myristoyltransferase 2	23.6755	-1.06874	0.343202	-3.11404	0.00184547	0.00879327	14.7445	21.3772	5.01967	26.0745	20.3359	43.8886	24.8181	13.749	24.4008	59.0941	22.8421	21.6189	3.73323	5.75626	10.4459	7.18655	13.8609	65.1322	6.59857	7.76637	49.9066	51.0143	5.90498	35.4613	39.8803	28.7252	23.1592	28.0997	12.0916	24.6868	23.6226	25.4033	23.4211	11.564	13.2081	36.148	25.2519
ENSSSCG00000010723	ACADSB	acyl-CoA dehydrogenase short/branched chain	3060.36	-1.06861	0.184349	-5.79665	6.76545e-09	2.33401e-07	1263.42	2649.71	2290.98	3307.45	2431.89	3674.1	4080.29	4589	2093.75	2528.3	2234.45	2317.77	1852.93	2142.48	3856.28	1595.41	1574.6	2144.54	7139.65	2022.17	5104.18	4601.1	1300.28	3447.08	4238.09	3343.79	2566.68	1451.07	1968.25	1654.9	1209.64	3792.79	4022.05	10517.5	1755.29	4385.53	2085.96
ENSSSCG00000008394	FANCL	FA complementation group L	7.9204	-1.06813	0.359652	-2.96989	0.00297903	0.0128244	8.29375	7.48203	5.01967	12.0344	10.5186	18.0257	10.1111	7.40332	11.0197	4.63483	2.44737	5.68918	2.48882	3.45376	0	1.79664	6.93044	26.5353	4.39904	8.73717	17.6141	13.7346	5.90498	9.78242	17.2455	12.5673	11.9789	5.61994	2.68703	2.64501	4.88744	6.15838	10.646	1.92734	4.17099	3.873	4.59125
ENSSSCG00000017569	CHAD	chondroadherin	8.33434	-1.06721	0.400426	-2.66518	0.0076946	0.0277655	1.84306	6.41317	5.01967	6.01719	11.2198	14.8908	17.4646	4.23047	7.08411	11.5871	7.34211	3.41351	0	3.45376	0	0.898319	6.93044	26.5353	5.4988	4.85398	10.7642	12.7536	12.4005	14.6736	18.3234	16.1579	11.9789	10.1159	2.68703	6.17169	7.33115	6.15838	3.19379	7.70935	5.56132	7.74601	9.9477
ENSSSCG00000021891		zinc finger DHHC-type containing 24	218.646	-1.0671	0.207653	-5.13889	2.76373e-07	5.60924e-06	112.426	178.5	106.417	204.584	179.517	214.741	269.323	207.293	157.425	172.647	166.421	64.8567	70.9313	110.52	114.905	132.951	92.868	348.176	208.955	120.379	421.76	405.171	123.414	506.24	404.192	302.512	281.903	174.218	188.092	212.483	254.961	237.867	250.18	393.177	198.122	236.253	265.527
ENSSSCG00000002868	PEPD	peptidase D	1247.72	-1.06703	0.187713	-5.68438	1.31286e-08	4.15731e-07	505.919	805.922	443.739	1189.4	1046.25	1204.59	1537.81	2629.23	706.837	1801.79	580.027	849.964	520.163	529.576	1333.59	688.113	353.453	1169.16	1608.95	392.202	2321.15	3721.1	558.611	2512.86	3324.08	1487.43	1434.27	1166.7	673.1	797.03	888.699	1524.2	1174.25	2064.18	522.764	1496.27	602.218
ENSSSCG00000025023	PGGHG	protein-glucosylgalactosylhydroxylysine glucosidase	434.514	-1.06669	0.17092	-6.24083	4.35248e-10	2.1457e-08	203.658	452.128	330.294	753.152	309.246	521.961	587.363	716.006	452.596	855.126	442.974	376.624	185.417	195.713	576.266	103.307	123.362	324.053	486.094	291.239	311.182	545.461	134.043	643.194	424.671	385.097	424.053	408.008	311.695	323.573	275.326	682.04	440.743	834.537	426.136	729.416	491.263
ENSSSCG00000040796	IPP	intracisternal A particle-promoted polypeptide	81.3164	-1.06362	0.222861	-4.77257	1.81887e-06	2.78087e-05	44.2334	74.8203	28.1101	157.45	125.521	133.233	138.798	137.49	121.217	113.553	56.2895	23.8946	24.8882	34.5376	34.8197	72.7639	31.88	73.1732	172.662	42.715	100.792	96.1423	52.5543	107.607	115.33	87.0733	83.0536	39.3396	44.336	58.1903	65.9804	80.0589	89.4262	92.5121	67.431	114.899	71.9295
ENSSSCG00000037706	PRKAR2B	protein kinase cAMP-dependent type II regulatory subunit beta	555.249	-1.06328	0.176463	-6.02552	1.68564e-09	7.08254e-08	434.961	363.413	380.491	860.458	316.258	728.081	833.706	1104.15	848.519	690.59	513.948	279.908	222.749	270.544	219.364	242.546	173.261	467.183	893.006	533.938	644.872	1113.49	552.706	755.692	980.84	499.998	448.01	200.07	255.268	404.687	215.047	594.284	431.162	1243.13	440.039	925.648	462.185
ENSSSCG00000001435	AGPAT1	1-acylglycerol-3-phosphate O-acyltransferase 1	397.988	-1.06313	0.210019	-5.06205	4.14766e-07	7.86606e-06	175.09	234.081	263.031	468.338	290.312	460.83	477.06	357.474	227.479	330.232	241.474	170.676	160.529	285.511	219.364	291.055	203.755	435.019	221.052	273.765	870.919	700.466	298.792	1039.38	618.684	793.534	703.56	396.768	264.672	298.005	375.518	689.738	542.945	564.71	228.709	380.845	172.172
ENSSSCG00000011379	KLHDC8B	kelch domain containing 8B	316.002	-1.06271	0.177095	-6.00079	1.96361e-09	8.03646e-08	146.523	272.56	248.975	545.559	166.894	405.97	568.06	392.376	376.245	443.785	239.027	209.362	145.596	255.578	289.004	175.172	135.837	131.873	544.382	291.239	276.933	347.29	187.778	501.349	370.779	519.747	309.854	211.31	194.81	232.761	195.497	490.361	301.281	655.294	279.456	396.337	237.214
ENSSSCG00000015616	HSD11B1	hydroxysteroid 11-beta dehydrogenase 1	1487.84	-1.06235	0.178657	-5.94633	2.74224e-09	1.07176e-07	400.865	2107.8	1353.3	3069.77	1391.96	1365.25	1583.77	1440.47	643.867	1648.84	485.395	772.591	1170.99	1108.66	2468.72	989.049	1570.44	1781.89	2328.19	934.877	2229.16	2327.04	628.289	2754.97	1538.09	1686.71	1982.91	577.73	798.047	766.172	910.692	1227.06	2437.93	2852.46	694.469	2274.74	746.843
ENSSSCG00000023166	RNF227	ring finger protein 227	152.681	-1.06227	0.202689	-5.24091	1.59789e-07	3.51435e-06	52.5271	74.8203	102.401	174.499	127.625	167.717	181.081	168.161	145.618	271.138	98.7106	70.5459	63.4649	84.0414	240.256	64.679	67.9184	77.1937	136.37	224.254	132.106	185.417	73.8122	265.348	177.845	163.375	169.302	68.5633	150.474	86.4037	94.4904	262.501	160.754	445.215	187.694	253.036	179.824
ENSSSCG00000040735	DDAH1	dimethylarginine dimethylaminohydrolase 1	882.536	-1.06224	0.264671	-4.01345	5.98368e-05	0.000509494	325.299	477.781	855.351	1901.43	219.487	958.496	773.039	896.859	189.697	1844.66	270.027	519.991	486.564	965.901	976.693	234.461	311.87	344.959	882.008	559.179	529.402	1382.29	198.998	1005.14	1850.66	1385.99	959.11	668.773	834.322	375.592	287.544	1825.96	1286.03	2998.94	241.917	2539.4	290.014
ENSSSCG00000008997	FGB	fibrinogen beta chain	339058	-1.06185	0.250722	-4.23517	2.28381e-05	0.000227503	246912	693481	228353	556735	199527	513540	360167	211568	76211.6	191146	64321	247775	398597	206633	546408	149688	138845	580501	495077	12415.5	678594	439799	15980.6	680301	157319	439866	469335	634416	464367	399805	171326	648820	758100	248135	24057.6	170812	26217.5
ENSSSCG00000015403	HGF	hepatocyte growth factor	453.032	-1.06148	0.292831	-3.6249	0.000289075	0.00191609	558.446	1351.04	244.96	627.794	650.748	898.149	434.777	1177.13	682.436	638.448	366.29	134.265	85.8643	183.049	94.0132	202.122	102.571	759.072	490.493	215.517	520.595	878.035	657.814	375.4	686.588	602.332	574.188	150.614	94.046	181.624	486.3	307.149	315.121	202.37	297.53	286.602	248.693
ENSSSCG00000034887	HAPLN4	hyaluronan and proteoglycan link protein 4	315.863	-1.0607	0.26382	-4.02057	5.80586e-05	0.000497772	66.35	211.635	373.463	592.693	130.43	373.053	318.04	316.227	182.613	360.358	339.369	127.438	94.5751	276.301	222.846	205.715	374.244	385.164	240.848	173.773	333.689	430.678	109.242	549.038	704.912	395.869	446.413	86.5471	100.764	149.002	134.404	501.908	239.534	799.845	177.962	1000.53	161.459
ENSSSCG00000035706		very-long-chain 3-oxoacyl-CoA reductase-B-like	228.523	-1.06063	0.340704	-3.11307	0.00185151	0.00881705	17.509	17.1018	15.059	18.0516	39.9705	55.6445	79.9696	529.866	709.985	1589.75	153.369	18.2054	18.6661	18.42	26.1148	41.3227	31.88	38.5969	425.607	113.583	97.8561	431.66	59.6403	103.938	1219.04	42.1902	36.7353	15.7358	13.4351	27.3318	53.7618	49.267	52.1653	769.007	190.475	1513.05	164.52
ENSSSCG00000006354	TOMM40L	translocase of outer mitochondrial membrane 40 like	103.007	-1.05996	0.223376	-4.7452	2.08301e-06	3.08681e-05	35.9396	111.162	74.2911	131.375	87.6547	144.205	131.444	181.91	166.083	127.458	111.763	48.927	52.2652	54.1089	50.4886	74.5605	83.1653	54.6789	292.536	72.8097	137.977	108.896	32.4774	139.4	116.407	118.492	106.213	51.7035	36.2749	67.8886	61.093	127.786	102.201	181.17	73.6874	171.703	91.0597
ENSSSCG00000000591	PIK3C2G	phosphatidylinositol-4-phosphate 3-kinase catalytic subunit type 2 gamma	126.335	-1.05782	0.335536	-3.15263	0.00161804	0.00793162	76.4868	78.0269	65.2557	67.192	42.0742	149.692	139.717	204.12	224.33	107.76	284.711	121.749	54.754	20.7225	113.164	16.1697	36.0383	213.087	181.461	30.0947	312.161	145.195	40.1538	147.959	107.785	88.8686	83.0536	201.194	128.977	215.128	74.1261	201.687	140.527	194.661	72.9923	209.142	84.1729
ENSSSCG00000012135	VEGFD	vascular endothelial growth factor D	22.934	-1.05704	0.422057	-2.5045	0.0122624	0.0403699	23.9597	4.27545	6.0236	22.063	11.921	14.1071	28.4949	62.3994	36.9948	64.8876	36.7106	2.27567	0	3.45376	6.96394	12.5765	6.93044	4.82461	63.7861	39.8026	13.6999	41.2039	34.2489	9.78242	60.3594	16.1579	17.569	0	1.34351	6.17169	16.2915	12.3168	3.19379	36.6194	28.5017	78.7511	19.8954
ENSSSCG00000029521	CD82	CD82 molecule	782.499	-1.05648	0.147913	-7.14256	9.16101e-13	1.01904e-10	419.295	584.667	482.892	1115.19	527.33	947.524	1009.27	714.949	605.298	1100.77	357.316	593.951	538.829	612.466	821.745	477.906	356.225	845.914	1038.17	232.02	1518.73	1651.1	281.077	1243.59	1387.19	1145.42	968.693	464.207	526.657	438.19	529.472	1105.43	1158.28	1457.07	273.2	1106.39	316.031
ENSSSCG00000049711		chromosome 17 C20orf173 homolog	9.70543	-1.05638	0.351821	-3.00262	0.0026767	0.0118078	3.68611	9.61975	15.059	10.0287	7.01237	20.3769	4.59595	6.3457	13.3811	16.2219	17.9474	3.41351	3.73323	4.60501	3.48197	8.08487	0	9.64921	14.2969	21.3575	4.89281	6.86731	12.9909	11.0052	2.15569	17.9533	3.99296	1.12399	4.03054	4.40835	4.88744	10.7772	11.7106	7.70935	22.2453	14.201	25.2519
ENSSSCG00000025592	TP63	tumor protein p63	25.1337	-1.05613	0.410614	-2.57208	0.0101089	0.034579	1.84306	2.13772	6.0236	11.0315	24.5433	11.7559	19.303	108.934	87.3707	30.1264	45.6843	3.41351	1.24441	4.60501	3.48197	5.38992	0	15.2779	21.9952	60.1894	21.5283	20.6019	25.3914	15.8964	46.3474	8.97663	19.9648	1.12399	5.37406	12.3434	18.7352	11.547	8.51678	28.91	86.2004	60.677	73.4599
ENSSSCG00000016821	SLC45A2	solute carrier family 45 member 2	52.4398	-1.05606	0.221699	-4.7635	1.90264e-06	2.87351e-05	18.4306	22.4461	18.0708	71.2034	24.5433	44.6723	87.3231	87.7822	28.3364	107.76	29.3684	31.8594	31.1102	33.3863	33.0787	40.4244	9.70262	41.8133	84.6816	57.277	61.6494	106.934	18.3054	74.591	82.9942	44.8831	67.8804	33.7196	24.1833	44.9652	19.5497	50.0368	41.5193	131.059	37.5389	170.412	26.7823
ENSSSCG00000011250	ACAA1	acetyl-CoA acyltransferase 1	2947.14	-1.05587	0.30396	-3.47371	0.000513324	0.00308327	611.895	1503.89	1758.89	3404.73	1047.65	1743.79	2276.83	5295.49	1322.37	6115.66	819.053	1731.79	2422.87	1264.08	5806.19	734.825	2572.58	1162.73	9679	1864.9	1801.53	3901.61	349.575	2843.02	3439.41	2299.81	1823.19	1164.45	3158.6	1418.61	762.44	3335.53	2597.62	14175.6	1598.88	9575.35	1659.74
ENSSSCG00000011555	RPUSD3	RNA pseudouridine synthase D3	92.1844	-1.05495	0.22651	-4.65741	3.20209e-06	4.4135e-05	38.7042	75.8892	49.1927	174.499	109.393	152.826	151.666	71.9179	110.984	70.6812	54.6579	37.5486	36.0879	40.2938	50.4886	146.426	59.6018	88.4511	177.061	88.3425	103.727	92.2182	69.0882	150.405	74.3714	172.351	137.358	53.9514	44.336	81.9954	77.3844	172.435	155.431	86.7301	52.1373	55.513	46.6777
ENSSSCG00000031617	SFT2D2	SFT2 domain containing 2	443.971	-1.05388	0.203213	-5.18607	2.14776e-07	4.50123e-06	206.422	222.323	393.542	514.47	335.893	493.747	486.252	748.792	513.204	616.432	380.158	125.162	109.508	298.174	208.918	328.785	137.223	450.297	638.961	251.436	625.301	891.769	459.998	595.505	1083.24	715.437	474.364	159.606	180.031	267.146	277.769	508.836	466.294	919.339	319.081	645.501	378.013
ENSSSCG00000020962	DYNLL2	dynein light chain LC8-type 2	1653.05	-1.05386	0.16607	-6.34588	2.21158e-10	1.17005e-08	786.064	1419.45	975.823	2129.08	1671.75	2480.49	2595.79	2009.47	1086.23	1572.37	927.553	815.829	503.986	823.145	1234.36	1401.38	1103.33	1966.03	2530.55	1227.09	2555.02	3082.44	1065.26	2962.85	2768.99	2310.58	2221.68	1095.89	730.872	1208.77	1366.04	1884.46	2132.39	3097.23	697.25	1910.68	812.651
ENSSSCG00000016436	CHPF2	chondroitin polymerizing factor 2	189.278	-1.05385	0.25108	-4.19729	2.70124e-05	0.000262332	105.054	296.075	56.2203	326.934	176.011	389.511	271.161	106.819	70.8411	132.093	137.053	96.7161	128.174	88.6464	81.8263	143.731	62.374	184.139	64.8859	115.525	277.911	195.228	170.654	280.022	144.431	369.837	374.54	257.393	188.092	225.708	286.73	356.416	415.193	84.8028	107.751	95.5341	139.268
ENSSSCG00000011968	NIT2	nitrilase family member 2	472.302	-1.05317	0.184998	-5.69286	1.2493e-08	3.98763e-07	177.855	154.985	233.916	677.937	307.843	351.109	470.625	1010.02	625.763	981.425	458.474	207.086	159.284	142.755	424.8	266.801	200.983	297.517	755.536	361.136	380.66	934.935	355.48	585.723	1076.77	359.065	288.292	140.499	184.061	208.074	217.491	400.295	360.899	1769.29	342.716	1235.49	369.595
ENSSSCG00000015267	FMO2	flavin containing dimethylaniline monoxygenase 2	7.97104	-1.05301	0.387514	-2.71733	0.00658102	0.0244575	0	14.9641	15.059	14.0401	1.40247	14.8908	6.43433	11.6338	3.93562	30.1264	1.63158	3.41351	2.48882	6.90751	5.22296	4.4916	5.54436	13.6697	7.69833	3.88319	6.84993	15.6967	6.49547	3.66841	10.7785	7.1813	2.39578	2.24798	1.34351	5.29002	4.88744	13.8564	7.45218	9.63668	5.56132	14.201	9.9477
ENSSSCG00000015535	QSOX1	quiescin sulfhydryl oxidase 1	4327.38	-1.05148	0.174641	-6.0208	1.73562e-09	7.27491e-08	1496.56	7314.22	3096.13	4306.3	4448.65	4161.58	8599.03	4250.56	3281.52	6087.85	3179.95	2057.21	2150.34	2068.8	3703.08	3056.08	1509.45	4032.57	4270.37	2965.78	8866.74	5640.02	2400.96	8094.95	5308.39	6037.68	5050.3	4317.24	2900.65	3904.92	4337.6	5738.84	4912.05	5704.92	2784.13	4550.78	3526.84
ENSSSCG00000008582		family with sequence similarity 228 member A	6.04447	-1.05147	0.373872	-2.81237	0.00491775	0.0193116	3.68611	10.6886	4.01573	5.01433	2.10371	12.5396	8.27271	7.40332	5.50986	13.9045	8.97369	5.68918	0	2.3025	1.74099	6.28823	8.31653	5.62871	13.1971	1.94159	2.93568	5.88627	4.13348	8.55962	7.54492	9.87429	7.18733	1.12399	1.34351	1.76334	4.07286	3.84899	4.25839	13.4914	3.47582	7.74601	9.18249
ENSSSCG00000025408	ULK4	unc-51 like kinase 4	40.8721	-1.05046	0.215189	-4.88159	1.05236e-06	1.73095e-05	17.509	20.3084	14.0551	30.086	29.452	25.8629	28.4949	49.708	25.1879	38.2373	26.1053	4.55135	7.46646	23.025	41.7836	25.1529	34.6522	56.2871	50.589	34.9487	59.6922	84.3698	29.5249	74.591	123.952	50.2691	42.3254	21.3558	21.4962	14.9884	35.0266	48.4972	43.6485	71.3114	42.405	131.682	33.6691
ENSSSCG00000001822	RCCD1	RCC1 domain containing 1	120.283	-1.05038	0.204759	-5.12984	2.89984e-07	5.84448e-06	46.0764	156.054	63.2478	170.487	107.991	181.041	193.949	145.951	158.212	150.632	80.7632	35.2729	42.3099	89.7977	57.4525	82.6454	97.0262	117.399	138.57	79.6053	163.42	200.133	68.4977	253.12	280.24	114.003	126.976	83.1751	30.9008	63.4803	77.3844	124.707	102.201	223.571	61.8697	206.56	75.7556
ENSSSCG00000003770	MIGA1	mitoguardin 1	47.4369	-1.05022	0.210746	-4.98334	6.24954e-07	1.10974e-05	28.5674	54.5119	29.1141	58.1662	61.0076	83.0749	78.1312	53.9384	74.7767	27.809	47.3158	22.7567	21.155	18.42	29.5967	32.3395	26.3357	109.358	74.7837	56.3062	70.4564	72.5973	38.9728	57.4717	71.1379	61.9387	63.8874	16.8598	22.8397	30.8585	40.7286	46.9576	54.2945	32.7647	38.9292	27.111	19.8954
ENSSSCG00000016877	NNT	nicotinamide nucleotide transhydrogenase	816.392	-1.04956	0.201777	-5.20158	1.97597e-07	4.18159e-06	420.217	803.784	382.499	700	863.924	948.307	720.645	1125.3	798.93	969.838	284.711	369.797	294.925	429.417	485.735	575.823	281.376	1227.86	1678.24	332.012	1361.18	2271.12	451.731	1293.73	1909.94	858.166	973.484	577.73	291.543	515.777	506.664	735.156	881.487	1738.46	424.746	1263.89	458.359
ENSSSCG00000021867	HPN	hepsin	1633.59	-1.04894	0.349317	-3.00282	0.00267488	0.0118055	791.593	2602.68	730.864	1236.53	3029.34	2328.45	1569.98	1608.63	1336.54	1967.49	1032.79	914.821	348.435	457.047	217.623	692.604	478.201	2987.24	1269.12	347.545	4219.56	2851.9	626.518	5519.73	2532.94	1494.61	2485.22	2567.19	511.879	1363.94	2455.12	1715.88	1765.1	973.305	745.912	1840.97	825.659
ENSSSCG00000048177		-	8.45308	-1.04858	0.368625	-2.84457	0.00444714	0.0178225	0	9.61975	5.01967	13.0372	1.40247	3.91863	17.4646	7.40332	7.87123	6.95224	3.26316	2.27567	7.46646	9.21002	10.4459	4.4916	13.8609	5.62871	18.6959	5.82478	7.82849	8.8294	5.90498	20.7876	14.012	3.59065	7.18733	1.12399	8.06108	3.52668	10.5894	13.0866	5.32299	15.4187	9.7323	15.492	8.41729
ENSSSCG00000033193	TPO	thyroid peroxidase	13.0007	-1.04819	0.363525	-2.8834	0.00393403	0.0161008	6.4507	11.7575	27.1062	39.1117	12.6223	19.5931	14.707	19.0371	3.93562	12.7458	7.34211	10.2405	1.24441	4.60501	3.48197	13.4748	8.31653	10.4533	14.2969	8.73717	7.82849	19.6209	12.9909	6.11401	4.31139	24.2369	32.7423	11.2399	4.03054	8.8167	2.44372	34.6409	23.4211	13.4914	5.56132	10.328	9.9477
ENSSSCG00000030425	SPHK2	sphingosine kinase 2	534.081	-1.04749	0.187182	-5.59608	2.19249e-08	6.44853e-07	249.734	586.805	384.507	573.639	507.696	648.141	682.039	535.154	365.225	855.126	328.763	225.292	214.038	338.468	205.436	339.565	436.618	538.748	726.942	546.558	941.376	673.977	211.989	935.444	546.468	791.739	832.134	357.428	212.275	305.058	518.883	805.208	688.795	973.305	399.024	837.86	441.525
ENSSSCG00000016695	HIBADH	3-hydroxyisobutyrate dehydrogenase	799.601	-1.04689	0.222315	-4.70902	2.48914e-06	3.5668e-05	206.422	306.763	218.857	636.819	732.793	684.192	732.595	1483.84	567.516	1507.48	422.579	525.681	308.614	199.167	402.168	322.497	156.628	636.848	1365.9	319.392	1280.94	2489.89	465.312	1082.18	2764.68	655.294	559.015	447.347	420.52	465.522	368.187	655.867	736.701	2380.26	412.233	2215.36	449.177
ENSSSCG00000013895	MAST3	microtubule associated serine/threonine kinase 3	504.238	-1.04669	0.193588	-5.40682	6.4153e-08	1.62045e-06	326.221	462.817	336.318	486.39	213.877	500.017	583.686	706.488	327.443	1086.87	265.132	266.254	187.906	466.257	323.823	215.597	460.182	714.846	542.182	185.422	680.1	799.551	121.643	1113.97	530.3	505.384	716.338	222.55	237.802	394.107	279.398	725.919	538.686	969.45	300.311	1516.93	346.639
ENSSSCG00000034569		obscurin, cytoskeletal calmodulin and titin-interacting RhoGEF	119.529	-1.04573	0.355106	-2.94483	0.0032313	0.0137164	48.841	66.2694	26.1023	59.169	69.4225	68.1841	145.232	189.313	262.899	258.392	116.658	46.6513	9.95528	27.6301	6.96394	16.1697	22.1774	55.483	183.66	92.2256	59.6922	385.55	96.8416	59.9173	753.415	40.3948	47.117	6.74393	13.4351	28.2135	30.9538	31.5617	15.969	152.26	56.3083	773.31	99.477
ENSSSCG00000007287	GSS	glutathione synthetase	637.96	-1.04406	0.149538	-6.98187	2.91272e-12	2.71744e-10	288.438	453.197	333.306	859.455	532.94	662.248	818.999	657.837	623.402	662.781	460.921	253.738	284.97	376.46	616.309	549.771	293.851	582.169	715.944	457.245	1029.45	873.129	553.296	1122.53	868.744	1100.53	838.522	541.762	485.009	420.557	525.399	1062.32	679.213	1241.2	508.165	752.654	518.046
ENSSSCG00000017864		sedoheptulokinase	174.792	-1.04369	0.2151	-4.85212	1.22151e-06	1.97364e-05	53.4486	176.362	127.5	194.556	136.04	218.659	154.424	248.54	118.856	413.659	114.211	78.5108	67.1981	97.8564	114.905	81.7471	116.431	170.469	260.643	71.8389	327.818	298.237	42.5158	326.488	298.563	149.91	115.796	249.525	61.8016	145.476	92.8613	357.186	202.274	264.045	77.8584	365.353	75.7556
ENSSSCG00000017906		ring finger protein 167	334.777	-1.04368	0.327326	-3.18851	0.00143008	0.00719309	236.833	365.551	142.559	433.238	481.049	527.447	515.666	265.462	209.375	266.503	273.29	155.884	99.5528	117.428	83.5673	222.783	72.0766	469.595	130.872	58.2478	787.742	667.11	304.697	932.999	524.911	574.504	645.263	499.051	146.443	298.886	364.114	407.223	408.805	198.516	185.609	160.084	153.807
ENSSSCG00000003567	KDF1	keratinocyte differentiation factor 1	48.7466	-1.04276	0.223217	-4.67152	2.98976e-06	4.15051e-05	15.666	38.479	24.0944	54.1547	18.2322	47.0235	61.5858	61.3418	43.2918	89.2205	51.3948	21.6189	43.5543	12.6638	50.4886	13.4748	26.3357	20.9066	57.1876	40.7734	59.6922	69.6541	24.8009	59.9173	74.3714	50.2691	59.0959	57.3234	48.3665	66.1253	15.4769	96.2247	64.9404	117.568	29.1969	83.9151	35.1996
ENSSSCG00000040989	GPRC5C	G protein-coupled receptor class C group 5 member C	1746.12	-1.04266	0.21152	-4.92938	8.24901e-07	1.39246e-05	677.323	2055.42	1079.23	1372.92	2309.88	1652.09	1989.13	1832.85	2098.47	2267.59	1359.92	750.972	511.452	1329.7	1023.7	1095.05	909.274	1737.66	2459.07	1648.41	3080.51	2962.75	1132.57	4795.83	1912.1	2277.37	2192.94	1379.13	691.91	893.132	1328.57	2399.46	2015.28	2848.6	1548.83	1540.16	1447.01
ENSSSCG00000007952	TRAP1	TNF receptor associated protein 1	364.529	-1.04243	0.391088	-2.66546	0.00768824	0.0277541	173.247	443.578	129.507	360.029	594.649	611.306	433.858	272.865	207.801	206.25	160.711	147.919	92.0863	84.0414	71.3804	222.783	80.3932	749.422	69.2849	82.5177	1161.55	643.565	183.645	1173.89	718.924	635.545	701.963	715.981	146.443	321.81	540.062	414.921	443.937	148.405	102.189	152.338	88.7641
ENSSSCG00000038693	RAB19	RAB19, member RAS oncogene family	39.9683	-1.04228	0.226072	-4.6104	4.01896e-06	5.33596e-05	41.4688	56.6497	32.1259	86.2464	11.2198	72.1027	42.2828	17.9795	14.1682	20.8567	12.2369	17.0676	36.0879	31.0838	64.4165	20.6613	41.5827	41.8133	41.7909	7.76637	59.6922	33.3555	20.6674	48.9121	17.2455	115.799	51.9085	60.6954	40.3054	41.4385	35.8412	110.851	68.1342	21.2007	6.25648	15.492	21.4258
ENSSSCG00000022906		sialic acid-binding Ig-like lectin 10	318.947	-1.04223	0.250915	-4.15372	3.27116e-05	0.000308335	146.523	594.287	277.086	278.797	415.834	393.43	250.02	423.047	294.384	323.279	133.79	114.922	145.596	178.444	149.725	182.359	117.818	353	422.308	105.817	639	390.456	139.357	666.428	410.659	463.194	458.392	302.353	161.222	198.376	641.883	614.298	684.536	246.699	155.022	203.978	124.729
ENSSSCG00000012757		centrin 2	518.687	-1.04223	0.204047	-5.10779	3.2595e-07	6.39121e-06	227.617	473.506	357.4	724.069	490.866	633.25	685.716	496.022	288.087	345.295	188.448	188.881	167.995	387.972	595.417	673.739	514.239	360.237	1221.83	285.414	1092.07	886.864	239.742	1047.94	480.719	752.242	586.167	257.393	309.008	332.39	439.869	676.652	914.489	875.011	273.2	445.395	276.24
ENSSSCG00000036632		nuclear receptor coactivator 5-like	14.3482	-1.04215	0.364336	-2.86042	0.00423083	0.0170938	18.4306	16.0329	6.0236	29.0831	26.647	22.728	23.8989	35.959	25.9751	19.698	8.97369	2.27567	4.97764	3.45376	0	10.7798	1.38609	22.5148	5.4988	10.6788	25.4426	21.583	17.1244	17.1192	11.8563	3.59065	21.562	6.74393	1.34351	4.40835	11.404	9.23757	18.0982	26.9827	6.95165	23.238	9.18249
ENSSSCG00000000856	PAH	phenylalanine hydroxylase	6608.99	-1.04214	0.235441	-4.42632	9.58526e-06	0.000109214	1683.63	1883.33	3134.28	5347.28	4367.31	4312.06	4152.9	15283.6	10265.7	20665.5	6181.24	2021.94	1487.07	1853.52	3194.71	2723.7	1404.11	2890.74	12469.1	4377.32	4208.79	15134.6	2744.63	3695.31	23489.5	3470.37	2676.88	1310.57	2242.32	2970.35	2093.45	5438.62	5169.69	28989.1	4556.8	22238.8	4403.77
ENSSSCG00000035238	ELOVL1	ELOVL fatty acid elongase 1	1116.82	-1.04197	0.18467	-5.64233	1.6776e-08	5.15245e-07	519.742	1504.96	1038.07	2005.73	1000.67	1589.39	1383.38	1206.74	441.576	922.331	501.711	647.429	492.786	1116.71	741.66	1164.22	537.803	1236.71	1121.76	575.682	1824.04	888.826	435.197	2702.39	750.181	2112.2	2456.47	1093.64	626.077	739.722	1384.77	1854.44	2329.34	815.263	433.088	731.998	395.612
ENSSSCG00000040147	SHISA3	shisa family member 3	29.0525	-1.04121	0.286578	-3.63325	0.000279869	0.00186361	38.7042	37.4102	9.0354	34.0974	28.0495	45.4561	64.3433	40.1894	33.8463	63.7289	25.2895	10.2405	11.1997	21.8738	20.8918	7.18655	9.70262	27.3394	24.1947	19.4159	49.9066	40.2228	27.7534	9.78242	24.7905	7.1813	54.3043	7.86792	9.4046	14.9884	31.7683	34.6409	23.4211	26.9827	38.9292	67.1321	33.6691
ENSSSCG00000004089	RMND1	required for meiotic nuclear division 1 homolog	179.233	-1.04068	0.175754	-5.92121	3.19583e-09	1.21617e-07	116.113	158.192	128.503	176.504	140.247	247.657	193.949	229.503	236.137	256.074	138.684	73.9594	57.2428	110.52	130.574	114.087	109.501	135.893	371.719	271.823	257.362	293.332	132.862	286.136	309.342	180.43	154.128	66.3153	60.4581	70.5336	90.4176	168.586	149.044	375.831	180.743	280.147	179.059
ENSSSCG00000005586	LHX2	LIM homeobox 2	88.3552	-1.04066	0.273617	-3.80335	0.000142752	0.0010652	97.682	56.6497	59.2321	160.458	83.4472	144.205	211.414	106.819	86.5836	155.267	118.29	34.1351	29.8658	40.2938	24.3738	59.2891	41.5827	61.9158	84.6816	123.291	178.098	172.664	80.3077	77.0366	113.174	94.2546	135.761	10.1159	22.8397	54.6636	38.2849	100.843	19.1628	117.568	52.8325	180.74	41.3212
ENSSSCG00000033538	SMLR1	small leucine rich protein 1	650.914	-1.04041	0.314268	-3.31058	0.000931035	0.00508218	82.016	154.985	284.113	481.375	121.314	363.648	513.827	1396.05	828.841	2006.88	262.684	372.073	352.168	382.216	572.784	234.461	56.8296	253.292	1310.91	221.342	354.239	1147.82	110.423	615.07	1434.61	362.656	221.21	194.45	593.833	372.947	155.583	700.516	667.503	2771.51	593.671	2897.01	638.948
ENSSSCG00000014128	CKMT2	creatine kinase, mitochondrial 2	35.7157	-1.03979	0.312932	-3.32274	0.000891372	0.00490508	6.4507	18.1706	25.0983	31.0888	20.3359	41.5374	45.9595	77.206	29.1236	126.299	39.1579	9.1027	6.22205	33.3863	22.6328	27.8479	8.31653	30.5558	49.4892	71.8389	21.5283	81.4267	22.4389	11.0052	36.6468	37.7018	17.569	1.12399	17.4657	7.93503	13.8477	44.6482	27.6795	92.5121	31.2824	116.19	20.6606
ENSSSCG00000039057	ALKAL2	ALK and LTK ligand 2	13.2788	-1.03902	0.342619	-3.03259	0.00242464	0.0109342	22.1167	32.0658	3.0118	22.063	10.5186	18.8094	11.9495	32.7861	7.08411	41.7135	17.1316	10.2405	6.22205	9.21002	1.74099	2.69496	1.38609	13.6697	13.1971	11.6496	23.4855	21.583	12.9909	13.4508	10.7785	3.59065	11.9789	4.49595	0	8.8167	4.88744	9.23757	15.969	13.4914	20.8549	14.201	12.2433
ENSSSCG00000003217	ASPDH	aspartate dehydrogenase domain containing	1705.04	-1.03839	0.209317	-4.96082	7.01953e-07	1.21932e-05	619.267	839.056	1067.18	1930.52	546.264	1172.45	1746.46	2926.42	1125.59	2865.48	1278.34	995.607	816.333	1123.62	1784.51	485.092	1473.41	935.974	2649.32	1511.53	1937.55	2806.77	550.934	2177.81	2806.71	1434.47	1344.83	653.037	767.146	668.306	600.34	2166.98	1414.85	8659.52	1417.44	4373.91	1413.34
ENSSSCG00000004875	CYB5A	cytochrome b5 type A (microsomal)	7212.89	-1.03663	0.250376	-4.14028	3.46879e-05	0.000324321	3356.21	4226.28	5316.83	6149.57	5677.92	8450.12	8186.31	11664.5	8586.73	12697.1	5837.79	6276.31	5251.41	3931.53	8720.59	2341.02	1781.12	3797.77	21241.9	2460	10308.2	14911.9	3035.16	6880.71	14352.6	5655.28	3506.62	2762.76	3880.07	5130.44	2325.6	9590.13	9651.64	20229.3	3162.3	12508.5	3034.81
ENSSSCG00000006480	NAXE	NAD(P)HX epimerase	228.115	-1.03475	0.291797	-3.54614	0.000390916	0.00246496	127.171	162.467	44.1731	298.854	183.023	326.03	313.444	210.466	129.875	256.074	115.026	131.989	128.174	136.999	85.3083	154.511	38.8105	270.982	111.076	61.1602	578.33	436.565	118.69	608.956	400.959	446.138	410.477	337.196	141.069	261.856	285.915	270.199	323.638	219.716	56.3083	189.777	68.8687
ENSSSCG00000003289	ISOC2	isochorismatase domain containing 2	332.362	-1.03473	0.16151	-6.40657	1.48833e-10	8.27787e-09	180.62	392.272	190.747	553.582	315.557	541.554	494.524	401.894	241.647	358.041	213.737	194.57	190.395	160.024	186.285	260.513	101.184	415.72	310.133	149.503	493.195	527.802	115.147	522.137	439.761	505.384	512.696	330.453	236.458	318.283	312.796	538.088	420.516	402.813	218.282	325.332	225.736
ENSSSCG00000003063	PHLDB3	pleckstrin homology like domain family B member 3	44.7158	-1.03409	0.315967	-3.27277	0.001065	0.00565685	16.5875	34.2036	39.1534	45.1289	56.099	65.8329	74.4544	43.3623	54.3115	81.1095	47.3158	15.9297	3.73323	23.025	6.96394	32.3395	20.7913	41.0092	65.9857	28.1531	91.0062	89.275	24.8009	112.498	98.084	38.5995	37.5339	8.99191	5.37406	29.9768	46.4306	38.4899	29.8087	57.8201	32.6727	87.7881	29.8431
ENSSSCG00000009405	SUCLA2	succinate-CoA ligase ADP-forming beta subunit	1925.92	-1.03355	0.19411	-5.32457	1.01192e-07	2.37133e-06	525.271	2077.87	2075.13	3936.25	1157.04	1514.94	2054.39	2335.22	857.177	1813.38	497.632	1215.21	1152.32	1535.77	3119.85	1227.1	713.836	4232.79	1574.86	443.654	3241.97	3857.47	566.287	2841.79	2437.01	3335.72	3224.72	1623.04	2214.11	1782.74	1265.03	2059.98	2597.62	2781.15	611.05	2094	665.731
ENSSSCG00000008702	DOK7	docking protein 7	150.956	-1.03302	0.255012	-4.05086	5.10302e-05	0.00044905	114.269	160.329	116.456	139.398	209.67	318.192	301.494	93.0702	103.9	147.156	143.579	40.9621	57.2428	95.5539	64.4165	120.375	91.4819	129.46	74.7837	85.4301	245.619	101.048	114.557	267.794	169.222	338.419	209.231	111.275	57.7711	177.216	177.577	407.223	279.989	106.003	84.8101	68.4231	61.9818
ENSSSCG00000017311	MAPT	microtubule associated protein tau	119.637	-1.03101	0.334128	-3.08568	0.00203089	0.00948384	117.956	94.0598	87.3422	252.722	166.193	234.334	280.353	173.449	218.033	150.632	192.526	77.3729	38.5767	20.7225	29.5967	42.221	19.4052	33.7723	50.589	91.2549	148.741	158.929	104.518	322.82	156.288	253.141	166.906	51.7035	40.3054	35.2668	146.623	56.965	56.4237	161.896	38.9292	95.5341	60.4514
ENSSSCG00000004765	RMDN3	regulator of microtubule dynamics 3	29.4887	-1.03004	0.329521	-3.12588	0.00177273	0.0085143	22.1167	32.0658	2.00787	13.0372	27.3483	48.591	53.313	27.498	16.5296	44.0309	19.579	12.5162	23.6438	13.815	8.70493	19.763	5.54436	46.6379	8.79809	7.76637	63.6065	64.7489	19.4864	70.9226	46.3474	54.7574	47.117	26.9757	18.8092	38.7935	29.3246	36.9503	35.1317	19.2734	6.95165	34.857	23.7214
ENSSSCG00000003498	UBXN10	UBX domain protein 10	69.9376	-1.02948	0.339816	-3.02951	0.00244949	0.0110178	50.6841	47.0299	32.1259	78.2235	91.8621	72.8864	90.0807	65.5722	81.8608	92.6966	87.2896	3.41351	22.3994	32.2351	22.6328	53.8992	22.1774	53.0707	37.3919	150.473	48.9281	17.6588	50.7828	39.1297	16.1677	184.919	123.782	49.4555	64.4887	38.7935	90.4176	186.291	72.3926	179.242	75.0778	78.7511	83.4076
ENSSSCG00000008646	RNF144A	ring finger protein 144A	128.217	-1.02889	0.281927	-3.64949	0.000262758	0.00176798	80.173	161.398	62.2439	79.2263	138.144	201.417	136.959	162.873	159.786	319.803	137.869	25.0324	44.7987	36.8401	29.5967	71.8655	24.9496	177.706	57.1876	65.0434	168.313	216.811	118.69	220.105	428.983	149.91	111.803	96.663	25.5268	98.7471	112.411	117.779	132.01	98.2942	108.446	280.147	86.4685
ENSSSCG00000029304	STEAP3	STEAP3 metalloreductase	356.908	-1.02881	0.212805	-4.83451	1.33476e-06	2.1227e-05	118.877	361.275	158.621	388.109	329.581	442.021	570.817	237.964	210.949	147.156	159.079	314.043	377.056	215.284	306.413	228.173	162.172	579.757	654.358	110.671	1077.4	591.57	108.061	820.501	476.408	421.004	628.492	378.784	271.39	303.295	263.922	364.884	343.865	495.325	151.546	281.438	155.337
ENSSSCG00000013665		complement C3	631.621	-1.02677	0.351713	-2.91934	0.00350768	0.0146566	312.398	680.865	321.259	684.957	861.119	855.828	1033.17	311.997	90.5192	297.788	430.737	424.413	194.128	178.444	170.617	409.634	322.959	2401.05	1092.06	69.8973	1941.47	530.745	67.9072	1438.02	322.276	471.273	994.248	1462.31	349.314	1262.55	821.089	695.897	716.474	547.364	75.7729	454.432	74.9904
ENSSSCG00000006337	HSD17B7	hydroxysteroid 17-beta dehydrogenase 7	524.376	-1.02674	0.228298	-4.49734	6.88075e-06	8.29754e-05	163.11	1006.87	317.243	362.034	592.545	507.07	693.07	932.818	699.753	446.102	332.842	485.856	364.612	239.46	517.073	292.852	356.225	677.053	1231.73	254.349	1239.84	982.025	124.005	785.039	793.295	497.305	613.319	329.329	264.672	210.719	282.657	415.691	503.555	770.935	304.482	438.94	373.421
ENSSSCG00000025252	PEX5	peroxisomal biogenesis factor 5	923.426	-1.02619	0.177895	-5.76853	7.99662e-09	2.69971e-07	532.643	987.628	515.018	1004.87	885.663	1483.59	1324.55	1153.86	1315.28	1443.75	570.237	576.883	324.791	672.331	452.656	620.739	361.769	1098.4	856.714	478.603	1351.39	1519.64	480.665	1589.64	1502.52	1337.52	1062.93	608.078	357.375	739.722	638.625	1393.33	1074.18	1485.98	474.102	1368.46	522.637
ENSSSCG00000009674	ELP3	elongator acetyltransferase complex subunit 3	438.631	-1.02584	0.154188	-6.65318	2.86826e-11	1.98069e-09	237.754	366.62	190.747	578.653	434.066	700.65	720.645	449.487	423.472	447.261	319.79	208.224	206.572	226.797	367.348	379.989	198.211	575.736	356.323	288.326	627.258	532.707	285.801	689.661	536.767	758.525	593.354	468.703	317.069	432.019	356.783	722.84	635.565	570.492	303.787	422.157	299.196
ENSSSCG00000002349	ACOT4	acyl-coenzyme A thioesterase 4	1434.37	-1.02565	0.142652	-7.18989	6.48428e-13	7.50145e-11	613.738	1275.15	832.261	1733.95	1520.98	1843.32	1987.29	2198.78	1243.65	1237.5	1119.26	791.935	785.222	739.104	1385.82	888.438	530.872	1315.51	2269.91	797.995	1990.39	2669.42	945.387	1999.28	2332.46	1964.98	1661.07	1018.33	943.147	1189.37	1100.49	1974.53	2150.49	2428.44	832.112	1811.27	949.623
ENSSSCG00000037508	GSN	gelsolin	72397.4	-1.02371	0.276088	-3.7079	0.000208989	0.00146885	15670.6	33571.9	58720.1	82577.9	16211.2	40561.7	38404.7	194458	63117.1	178308	41902.2	57727	61375.5	34165.7	124996	16677.3	19408	49023.6	113326	48424.3	48795	142265	11433.2	85763.7	163696	72464.7	52747	36692.6	55565	39269.6	11246.8	119723	59017	247907	48427.9	147133	47928.8
ENSSSCG00000005016	L2HGDH	L-2-hydroxyglutarate dehydrogenase	183.532	-1.02318	0.181506	-5.6372	1.72842e-08	5.25277e-07	117.034	192.395	167.657	293.839	178.815	248.441	208.656	265.462	251.092	227.107	199.869	118.335	64.7093	128.94	69.6394	127.561	52.6714	285.456	270.541	144.649	277.911	302.162	142.9	277.576	312.575	221.723	187.669	58.4474	76.5803	107.564	117.298	207.845	215.049	152.26	162.669	167.83	189.772
ENSSSCG00000001596	MOCS1	molybdenum cofactor synthesis 1	80.3288	-1.02242	0.270993	-3.77285	0.000161391	0.00117921	44.2334	86.5778	38.1495	102.292	45.5804	82.2911	157.182	69.8027	32.2721	127.458	53.0264	38.6865	48.532	21.8738	53.9705	60.1874	52.6714	95.688	41.7909	24.2699	243.662	102.029	32.4774	185.866	139.042	90.664	118.99	101.159	47.023	86.4037	69.2387	60.814	94.7492	206.225	16.684	92.9521	7.65208
ENSSSCG00000004203	L3MBTL3	L3MBTL histone methyl-lysine binding protein 3	240.053	-1.02085	0.145965	-6.99381	2.67515e-12	2.53671e-10	167.718	166.742	164.645	319.914	128.326	292.329	239.909	357.474	236.924	307.057	176.211	79.6486	92.0863	164.629	167.135	140.138	182.964	296.713	274.94	183.48	333.689	413.02	215.532	232.333	369.701	382.404	206.836	127.011	134.351	144.594	125.444	428.777	221.436	454.851	218.977	457.014	277.005
ENSSSCG00000032369	HSD3B7	hydroxy-delta-5-steroid dehydrogenase, 3 beta- and steroid delta-isomerase 7	2206.07	-1.01918	0.207584	-4.90972	9.12068e-07	1.51892e-05	794.357	2044.73	1597.26	3051.72	1914.38	2445.22	3071.02	2527.7	1092.53	1785.57	558	870.445	1810.62	2120.61	2552.28	1596.31	1071.45	2393.01	2007.06	525.201	5069.93	4042.88	314.735	5326.53	3421.08	3690.29	3490.65	2762.76	1956.16	1334.85	1104.56	3091.51	3184.21	3866.24	476.883	2092.71	569.315
ENSSSCG00000029874	DUSP14	dual specificity phosphatase 14	54.9922	-1.01823	0.183897	-5.53695	3.07783e-08	8.61444e-07	46.0764	45.9611	15.059	44.1261	42.7755	73.6702	71.6968	78.2636	44.866	66.0463	62.8158	32.9973	26.1326	41.4451	38.3017	37.7294	37.4244	57.8953	37.3919	58.2478	85.1348	74.5594	59.0498	108.829	65.7486	80.7897	101.421	25.8517	13.4351	44.0835	31.7683	76.2099	62.8113	80.9481	47.2712	65.8411	52.0341
ENSSSCG00000011366	SLC25A20	solute carrier family 25 member 20	834.224	-1.01709	0.184834	-5.50271	3.74005e-08	1.02046e-06	537.251	831.574	461.809	811.318	987.342	1219.48	1131.52	983.583	901.256	921.172	584.922	300.389	272.526	443.232	487.476	656.671	537.803	882.099	1420.89	792.17	1461.97	1180.2	546.801	1505.27	1092.94	884.198	884.042	410.256	303.634	558.097	704.605	896.814	962.396	1667.15	748.692	1039.26	855.502
ENSSSCG00000017152	SGSH	N-sulfoglucosamine sulfohydrolase	168.268	-1.01678	0.191469	-5.31044	1.09364e-07	2.52366e-06	102.29	105.817	104.409	201.576	114.302	131.666	231.636	230.56	222.756	259.55	156.632	47.7892	62.2205	67.9239	102.718	94.3235	115.045	95.688	185.86	191.247	241.705	321.783	148.805	311.815	236.048	171.454	162.913	62.9433	68.5192	63.4803	126.259	175.514	128.816	474.125	134.167	393.755	179.824
ENSSSCG00000002690	GAN	gigaxonin	14.0482	-1.01672	0.3811	-2.66786	0.00763368	0.0275859	9.21528	23.515	15.059	10.0287	16.1285	29.7816	22.0606	9.51855	3.93562	15.0632	8.97369	6.82702	4.97764	1.15125	8.70493	10.7798	4.15827	75.5855	7.69833	10.6788	8.80705	11.7725	16.5339	17.1192	19.4012	21.5439	15.1733	13.4879	13.4351	13.2251	13.8477	15.3959	20.2274	0	2.78066	19.365	3.82604
ENSSSCG00000013746	CALR	calreticulin	16546.9	-1.01296	0.174062	-5.81952	5.90152e-09	2.08769e-07	7832.07	16488.3	11667.7	24317.5	10961	18809.4	25716.2	11038.3	6774.77	9078.47	6167.37	10538.6	10135.7	12565.9	30521.2	19696.5	21367.9	11202.7	27843.7	9471.09	38873.3	19164.7	6056.14	34897.6	12300.4	27889.5	18789.3	10229.4	16298.2	10376.4	9852.26	24387.2	27320.8	26179	7997.87	10652	8778.46
ENSSSCG00000013088	LRRC10B	leucine rich repeat containing 10B	8.67909	-1.01219	0.394444	-2.56613	0.0102841	0.0350541	0.921528	7.48203	5.01967	7.02006	4.20742	13.3233	12.8687	13.749	2.36137	13.9045	12.2369	3.41351	4.97764	1.15125	8.70493	9.88151	6.93044	5.62871	14.2969	15.5327	5.87137	6.86731	4.13348	11.0052	7.54492	6.28364	5.59015	4.49595	8.06108	0	19.5497	13.8564	29.8087	7.70935	11.8178	10.328	4.59125
ENSSSCG00000035364		vitamin K epoxide reductase complex subunit 1	3352.59	-1.01204	0.205219	-4.93149	8.16055e-07	1.38156e-05	1996.95	4030.68	3719.57	5289.11	2147.19	3673.32	4647.43	3681.56	2913.14	3494.66	1911.4	1831.92	2254.87	2729.62	6036	2091.29	1036.79	1349.28	3890.95	1333.87	3492.48	4503.97	1550.65	5248.27	3672.22	3959.59	2741.57	1723.07	4319.4	2198.89	1462.97	8202.96	5530.58	8214.31	1726.09	3697.43	1741.61
ENSSSCG00000009373	SLC25A15	solute carrier family 25 member 15	1745.54	-1.01189	0.192851	-5.24703	1.54571e-07	3.42564e-06	738.144	1965.64	1358.32	3164.04	898.285	2685.83	2016.7	1507.1	343.973	3097.22	273.29	1067.29	1011.7	2000.88	1784.51	1752.62	537.803	1732.03	1830	567.916	2598.08	2623.31	188.959	2706.06	2633.18	3319.56	2334.29	2279.45	1358.29	1141.76	1348.12	3216.21	3565.34	2393.75	268.334	2003.63	273.179
ENSSSCG00000032606		-	8.93356	-1.01169	0.344954	-2.93284	0.00335881	0.0141463	7.37223	4.27545	8.03147	19.0544	9.81732	15.6745	20.2222	10.5762	6.29699	13.9045	6.52632	0	1.24441	4.60501	3.48197	10.7798	6.93044	4.02051	7.69833	12.6204	8.80705	6.86731	7.67647	18.342	4.31139	8.97663	9.58311	6.74393	0	5.29002	6.51658	17.7053	9.58138	23.128	6.95165	7.74601	9.18249
ENSSSCG00000002298	ZFYVE26	zinc finger FYVE-type containing 26	274.373	-1.01153	0.201734	-5.01421	5.32518e-07	9.64591e-06	161.267	308.901	168.661	564.613	241.927	427.13	457.757	164.988	133.024	195.822	193.342	133.127	226.483	153.117	118.387	161.697	216.23	561.263	501.491	215.517	424.696	415.963	200.179	657.868	381.558	245.96	342.596	215.806	142.412	194.849	250.888	264.04	215.049	339.211	175.181	187.195	193.598
ENSSSCG00000016585	IMPDH1	inosine monophosphate dehydrogenase 1	173.964	-1.01029	0.179135	-5.6398	1.70249e-08	5.20597e-07	130.857	321.727	59.2321	297.851	119.21	253.927	271.161	83.5517	66.9055	104.284	73.4211	190.019	159.284	138.15	405.65	141.934	133.065	119.811	87.9809	103.875	248.555	106.934	76.1742	222.55	65.7486	331.238	313.048	134.879	171.97	158.701	184.908	310.998	394.966	132.986	120.959	100.698	99.477
ENSSSCG00000039318	HS3ST3B1	heparan sulfate-glucosamine 3-sulfotransferase 3B1	665.105	-1.0098	0.201502	-5.01139	5.40387e-07	9.75867e-06	366.768	1216.36	557.183	1453.15	434.767	1023.55	414.555	405.067	292.81	352.247	189.263	405.07	328.524	746.011	1232.62	521.025	489.289	1480.35	382.717	276.677	1782.94	779.93	285.801	1472.25	563.714	1116.69	1382.36	615.946	642.2	575.731	417.876	795.97	577.012	397.031	133.472	355.025	146.92
ENSSSCG00000006452		CD1d molecule	25.3361	-1.00942	0.365097	-2.7648	0.00569574	0.0217466	30.4104	22.4461	4.01573	19.0544	10.5186	21.9443	22.9798	58.1689	60.6085	68.3637	26.9211	3.41351	2.48882	8.05877	0	8.98319	9.70262	18.4943	64.8859	52.423	32.2925	38.2607	66.7262	46.4665	74.3714	11.6696	21.562	13.4879	5.37406	5.29002	12.2186	9.23757	8.51678	15.4187	17.3791	32.275	13.0085
ENSSSCG00000001697	TMEM63B	transmembrane protein 63B	848.086	-1.00794	0.204087	-4.9388	7.86066e-07	1.33994e-05	336.358	602.838	912.576	939.685	800.813	1015.71	891.615	909.55	726.515	1139.01	491.921	422.138	260.082	684.995	680.725	416.82	618.196	849.131	1145.95	857.213	1449.25	1616.76	425.158	1649.56	1713.78	1044.88	1219.45	279.873	240.489	267.146	597.896	967.635	718.603	1869.52	497.738	1596.97	522.637
ENSSSCG00000028501		aldehyde dehydrogenase 3 family member B1	99.1568	-1.00792	0.365462	-2.75792	0.00581696	0.0221073	33.175	100.473	28.1101	184.527	122.717	139.503	142.475	139.605	69.2669	168.013	48.1316	38.6865	11.1997	55.2601	6.96394	38.6277	29.1079	146.346	19.7957	31.0655	148.741	99.0855	37.7918	259.234	182.156	166.965	75.0677	153.986	47.023	135.777	237.855	77.7495	86.2324	86.7301	79.2488	151.047	91.0597
ENSSSCG00000021443	SGK1	serum/glucocorticoid regulated kinase 1	2211.14	-1.00665	0.28149	-3.57614	0.000348708	0.00224782	2924.01	5759.03	958.756	2493.12	3013.92	3460.15	4124.41	2975.08	880.004	1740.38	595.527	1888.81	1363.87	1662.41	1063.74	645.892	1269.66	6309.78	1992.77	455.303	3485.64	3168.77	635.966	5380.33	720.001	2393.17	2894.9	4039.61	885.376	879.025	1593.3	2087.69	4790.69	697.696	495.652	1649.9	437.699
ENSSSCG00000016400		mab-21 like 4	46.1287	-1.00584	0.347276	-2.89638	0.00377497	0.0155762	7.37223	34.2036	39.1534	83.2378	26.647	68.1841	71.6968	125.856	5.50986	208.567	10.6053	7.96486	11.1997	55.2601	20.8918	24.2546	19.4052	20.1025	48.3895	7.76637	9.78561	37.2797	9.44796	37.9069	82.9942	48.4738	59.0959	29.2237	8.06108	7.05336	12.2186	36.1805	33.0025	186.952	6.25648	206.56	0
ENSSSCG00000001773	TMED3	transmembrane p24 trafficking protein 3	3353.83	-1.00565	0.221062	-4.54918	5.38561e-06	6.78697e-05	811.866	2856	1297.08	4577.08	2027.98	2276.72	2149.99	5479.51	3675.08	3538.69	2974.37	2140.27	2580.91	1504.69	3617.77	2820.72	2504.66	2844.91	7353	5694.69	3121.61	3085.38	780.047	2762.31	4658.45	4885.98	3140.07	1635.4	2536.55	1910.58	1338.34	5149.94	4082.73	6880.59	4677.76	5834.03	4885.85
ENSSSCG00000002283	FUT8	fucosyltransferase 8	407.372	-1.00557	0.132979	-7.56182	3.97475e-14	5.99773e-12	314.241	637.042	363.424	752.149	277.69	703.001	546.918	431.508	164.509	278.09	178.658	318.594	375.812	253.276	607.604	327.887	128.906	559.654	553.18	137.853	684.993	580.778	150.577	564.935	493.654	502.691	634.881	414.752	364.092	298.005	240.299	720.53	528.04	318.01	167.535	342.115	156.868
ENSSSCG00000046578		-	11.7138	-1.00199	0.347549	-2.88303	0.00393868	0.016116	2.76458	3.20658	3.0118	8.02292	7.01237	10.9722	12.8687	12.6914	5.50986	42.8722	4.07895	2.27567	8.71087	1.15125	10.4459	6.28823	8.31653	3.2164	26.3943	12.6204	9.78561	45.128	5.90498	6.11401	44.1917	11.6696	8.78452	3.37196	5.37406	0.88167	6.51658	8.46777	7.45218	32.7647	2.78066	38.73	3.06083
ENSSSCG00000040524	ISYNA1	inositol-3-phosphate synthase 1	3003.53	-1.00185	0.329749	-3.03822	0.00237983	0.0107713	447.863	3931.27	2046.02	5592.98	4663.23	2374.69	5869.95	5000.41	6082.1	3391.54	1960.34	2305.26	1365.12	2524.7	4160.95	851.607	2194.18	913.459	1563.86	3433.71	1424.79	3161.91	938.891	11518.8	1514.37	2275.58	3780.54	1209.41	2482.81	1071.23	1470.3	3406.35	2831.83	4020.42	4176.55	1480.78	3692.89
ENSSSCG00000000105	KDELR3	KDEL endoplasmic reticulum protein retention receptor 3	654.513	-1.00178	0.16068	-6.23464	4.52811e-10	2.21902e-08	433.118	1111.62	721.828	1129.23	603.765	631.682	908.16	408.24	363.651	385.85	212.105	481.305	424.344	499.643	802.594	647.688	352.067	453.513	871.011	282.502	1161.55	467.958	281.077	1639.78	362.156	1105.02	905.604	393.396	600.551	650.673	485.485	1199.34	1349.91	759.37	394.854	353.734	382.604
ENSSSCG00000022659	CLTC	clathrin heavy chain	1184.98	-0.999571	0.331667	-3.01378	0.00258015	0.0114833	728.007	1695.21	345.353	1344.84	1767.82	2969.53	1185.76	883.11	709.198	707.97	532.711	519.991	507.719	414.451	370.83	1219.02	507.309	3448.79	651.058	289.297	2477.72	1959.15	982.588	2221.83	2105.03	2035.9	1808.81	1293.71	433.955	1041.25	1702.46	1294.8	2228.2	250.554	409.452	397.628	403.264
ENSSSCG00000036050	CD302	CD302 molecule	335.463	-0.999092	0.181715	-5.49813	3.83844e-08	1.04239e-06	250.656	415.787	176.692	352.006	235.616	365.216	341.939	721.294	377.819	922.331	314.079	180.916	121.952	115.125	170.617	128.46	79.0071	319.228	495.992	127.174	421.76	728.916	291.706	475.67	868.744	262.118	280.306	116.895	173.313	284.78	227.266	287.904	321.508	506.889	176.572	565.458	210.432
ENSSSCG00000012482	SRPX2	sushi repeat containing protein X-linked 2	120.833	-0.998839	0.250901	-3.98101	6.86232e-05	0.000573059	81.0945	91.9221	79.3107	299.857	37.8668	146.557	121.333	35.959	9.44548	24.3329	16.3158	65.9945	139.374	43.7476	146.243	81.7471	232.863	194.592	64.8859	22.3283	279.869	37.2797	14.7624	328.934	31.2575	293.536	311.451	212.434	176	138.422	121.371	290.214	167.142	44.3287	32.6727	23.238	32.1387
ENSSSCG00000015035	C11orf52	chromosome 9 C11orf52 homolog	81.3418	-0.998706	0.181086	-5.5151	3.4859e-08	9.57135e-07	45.1549	55.5808	75.295	134.384	61.0076	86.9935	104.788	81.4365	55.0986	117.029	50.579	27.3081	73.4202	51.8064	71.3804	35.0345	47.127	59.5035	145.168	42.715	123.299	96.1423	30.1154	110.052	89.4612	105.924	79.0607	35.9676	71.2062	71.4153	65.1658	184.751	92.62	188.879	54.2228	148.465	42.0864
ENSSSCG00000009889	ALDH2	aldehyde dehydrogenase 2 family member	2699.48	-0.998055	0.212609	-4.69432	2.67496e-06	3.78618e-05	1526.05	3873.55	1422.57	4313.32	2007.64	3173.3	2437.69	2919.02	1477.43	4213.06	1242.45	2117.51	2085.63	1319.34	3233.01	1207.34	593.246	3284.75	3575.32	560.149	5303.8	4771.8	1317.4	2822.23	5628.51	3702.86	3015.49	3098.84	2447.88	2906.87	1599.82	4092.24	4470.24	3746.74	494.262	3462.46	417.038
ENSSSCG00000021610	CHPF	chondroitin polymerizing factor	662.415	-0.996922	0.262528	-3.7974	0.000146223	0.00108653	279.223	1154.37	272.066	684.957	813.435	973.387	818.999	305.651	404.581	769.382	360.579	329.973	288.703	286.662	370.83	592.891	286.92	729.32	610.367	191.247	1753.58	947.689	311.783	1826.87	890.301	889.584	818.557	1040.81	353.344	685.058	980.746	859.864	1286.03	487.616	240.527	422.157	191.302
ENSSSCG00000002355	ENTPD5	ectonucleoside triphosphate diphosphohydrolase 5 (inactive)	66.7629	-0.996776	0.252826	-3.94254	8.06229e-05	0.000655599	22.1167	40.6167	26.1023	62.1776	59.6052	54.8608	82.7271	61.3418	82.648	90.3792	81.579	19.3432	17.4217	35.6888	15.6689	52.1025	27.7218	102.121	67.0854	50.4814	115.47	210.925	86.2127	100.27	293.174	73.6084	104.616	20.2318	18.8092	36.1485	25.2518	40.7993	34.0671	109.858	43.7954	72.2961	32.9039
ENSSSCG00000006571	INTS3	integrator complex subunit 3	377.705	-0.99544	0.235346	-4.22969	2.34018e-05	0.000232052	177.855	216.979	177.696	368.052	296.623	472.586	565.302	250.655	265.261	373.104	310.816	210.5	155.551	292.418	85.3083	334.175	257.813	554.026	416.809	259.203	937.462	847.622	225.57	969.683	513.055	553.858	539.849	247.277	154.504	192.204	334.789	328.703	283.183	535.799	349.668	615.808	305.318
ENSSSCG00000009112	SEC24D	SEC24 homolog D, COPII coat complex component	808.042	-0.994578	0.195025	-5.09975	3.40095e-07	6.63855e-06	463.529	1141.54	568.226	1685.82	603.064	1742.22	1020.3	345.841	380.968	447.261	199.869	593.951	657.048	530.727	1143.83	1107.63	632.057	808.926	863.312	197.072	1294.64	1113.49	200.769	1285.17	726.468	1388.68	777.031	554.126	804.765	704.455	761.625	1342.53	2500.74	506.889	212.72	320.168	270.118
ENSSSCG00000035849	PTPRF	protein tyrosine phosphatase receptor type F	1394.52	-0.994455	0.236755	-4.20036	2.66491e-05	0.000259361	756.575	1299.74	1125.41	1449.14	1292.38	1726.55	2026.81	1253.28	1394	1674.33	1580.19	516.578	344.701	1115.56	325.564	1001.63	643.145	2348.78	939.196	1074.67	2042.26	1837.5	1566	3025.21	2387.43	2092.45	2283.18	762.064	373.497	923.991	1388.03	1641.21	1144.44	1445.5	1684.38	1586.64	1525.06
ENSSSCG00000006518	HCN3	hyperpolarization activated cyclic nucleotide gated potassium channel 3	12.8562	-0.994397	0.377347	-2.63523	0.00840793	0.0298318	4.60764	5.34431	5.01967	16.0458	14.0247	22.728	10.1111	10.5762	11.8069	13.9045	22.8421	2.27567	3.73323	3.45376	12.1869	15.2714	1.38609	31.3599	2.19952	5.82478	19.5712	40.2228	24.8009	9.78242	28.024	16.1579	16.7704	7.86792	2.68703	6.17169	13.8477	13.0866	10.646	7.70935	6.95165	16.783	19.8954
ENSSSCG00000047654	SAPCD1	suppressor APC domain containing 1	17.0136	-0.993883	0.32408	-3.06678	0.00216375	0.010002	9.21528	10.6886	19.0747	14.0401	9.11608	13.3233	18.3838	23.2676	33.0592	50.9831	27.7369	6.82702	3.73323	2.3025	10.4459	4.4916	2.77218	5.62871	26.3943	45.6274	9.78561	15.6967	17.1244	9.78242	14.012	15.2603	12.7775	4.49595	5.37406	5.29002	5.70201	13.0866	2.1292	21.2007	42.405	47.767	50.5037
ENSSSCG00000009532	POGLUT2	protein O-glucosyltransferase 2	290.366	-0.992595	0.313339	-3.16779	0.00153601	0.00760466	156.66	580.392	136.535	352.006	523.824	525.88	475.221	186.14	159.786	126.299	95.4475	118.335	113.241	127.789	107.941	353.938	54.0575	469.595	273.84	25.2407	757.406	285.484	131.09	624.852	293.174	551.165	420.858	383.28	186.748	360.603	421.134	397.215	644.081	129.132	62.5648	81.3331	51.2689
ENSSSCG00000022303	SLC25A16	solute carrier family 25 member 16	127.629	-0.992469	0.197765	-5.01843	5.20949e-07	9.51582e-06	70.0361	151.778	113.444	256.733	159.181	189.661	198.545	160.758	180.251	147.156	84.0264	53.4783	48.532	51.8064	66.1574	99.7134	47.127	113.378	163.864	60.1894	119.384	206.019	144.672	141.845	171.378	193.895	127.775	59.5714	76.5803	92.5754	128.702	176.284	229.953	152.26	91.7617	122.645	71.1643
ENSSSCG00000011280	VIPR1	vasoactive intestinal peptide receptor 1	165.514	-0.992458	0.248881	-3.98769	6.6721e-05	0.000560411	176.012	116.506	77.3029	132.378	89.7584	173.203	205.899	211.523	298.32	524.894	411.974	29.5838	73.4202	33.3863	41.7836	16.1697	33.2661	64.3281	162.765	404.822	131.127	301.181	196.636	80.705	161.677	65.5294	85.4494	31.4717	30.9008	106.682	78.199	153.959	138.398	344.993	285.017	380.845	273.944
ENSSSCG00000027114	SCP2	sterol carrier protein 2	3460.27	-0.991018	0.280682	-3.53075	0.000414391	0.00258202	991.564	1465.41	1773.95	4176.93	1062.37	2392.71	3396.41	6635.49	7665.79	6586.09	2537.92	3628.56	2287.22	1436.76	5962.87	1038.46	1266.89	1532.62	6925.19	4218.11	2572.64	6243.37	1548.88	3555.91	6041.33	2397.66	1852.74	729.468	2703.15	925.754	579.976	2531.09	1696.97	10679.4	4043.77	8768.48	4178.03
ENSSSCG00000023666	CTSB	cathepsin B	2835.11	-0.990276	0.367298	-2.69611	0.00701543	0.0257703	2072.52	3108.25	871.414	2866.19	3072.12	3704.67	3068.26	3176.02	1172.03	2666.19	974.869	934.164	1159.79	1390.71	1065.48	1861.32	486.517	4268.97	622.465	354.341	7347.04	8105.39	4839.13	5432.91	8704.69	5466.77	3957.03	3068.49	1234.69	2480.14	2490.96	3390.19	4939.73	1817.48	535.277	1718.32	474.429
ENSSSCG00000005939	FAM135B	family with sequence similarity 135 member B	45.2342	-0.989625	0.345454	-2.86471	0.00417396	0.0169151	10.1368	14.9641	19.0747	22.063	55.3977	28.9978	55.1514	16.9219	14.9553	34.7612	30.1842	14.7919	14.9329	29.9326	24.3738	11.6782	15.247	57.0912	67.0854	36.8903	108.62	112.82	6.49547	100.27	143.354	99.6406	88.6438	35.9676	51.0535	27.3318	28.51	26.1731	47.9069	65.5294	9.7323	131.682	15.3042
ENSSSCG00000014124	ANKRD34B	ankyrin repeat domain 34B	16.7307	-0.989387	0.320754	-3.08457	0.00203849	0.00950913	7.37223	22.4461	26.1023	41.1175	20.3359	43.8886	27.5757	10.5762	11.8069	13.9045	10.6053	3.41351	1.24441	20.7225	6.96394	11.6782	8.31653	34.5764	8.79809	10.6788	15.657	13.7346	18.3054	15.8964	16.1677	32.3159	31.1451	6.74393	4.03054	14.9884	25.2518	24.6335	26.6149	1.92734	7.64681	14.201	7.65208
ENSSSCG00000025357	LDAH	lipid droplet associated hydrolase	30.5453	-0.985057	0.301988	-3.26191	0.00110665	0.00582813	16.5875	27.7904	14.0551	32.0917	42.0742	50.9421	49.6363	20.0947	13.3811	20.8567	20.3948	13.654	19.9106	11.5125	8.70493	10.7798	5.54436	82.0183	38.4916	18.4451	74.3707	59.8437	17.7149	53.8033	25.8683	35.0089	36.7353	44.9595	29.5573	28.2135	39.0995	19.2449	28.7441	23.128	42.405	36.148	18.365
ENSSSCG00000037950	NIPAL1	NIPA like domain containing 1	435.991	-0.983994	0.334242	-2.94396	0.00324047	0.0137486	70.0361	424.338	161.633	389.112	789.593	786.86	785.908	511.886	423.472	473.911	286.342	186.605	44.7987	70.2264	167.135	547.975	396.421	815.359	351.923	335.896	563.651	1076.21	193.093	820.501	1059.52	625.671	376.936	186.582	119.573	135.777	407.286	330.243	480.133	516.526	441.43	387.3	391.786
ENSSSCG00000016334	SCLY	selenocysteine lyase	244.767	-0.983496	0.207149	-4.74777	2.05669e-06	3.06087e-05	125.328	243.7	88.3461	383.094	222.993	296.248	288.626	235.848	142.469	280.407	141.132	201.397	83.3754	224.494	280.299	262.309	255.04	229.169	303.534	48.5398	565.608	319.82	112.785	619.961	219.881	307.001	285.896	240.533	99.42	221.299	123	323.315	453.519	383.54	118.178	213.015	113.251
ENSSSCG00000000849	HSP90B1	heat shock protein 90 beta family member 1	27726.1	-0.983379	0.180199	-5.45717	4.8377e-08	1.27195e-06	19716.1	43728.2	19743.4	39703.4	19814.9	38270.9	50502.2	15778.6	11861.2	10800.3	9068.32	15630.5	20252.8	21511.1	30058.1	50204.4	25860.3	21899.7	56925.8	11166.1	79178.3	30944.1	13684.2	56760.1	15720.4	46849.9	34936	16692.3	23272.3	18845.7	16223.8	36952.6	44286.2	23145.4	12034	12140.6	11704.6
ENSSSCG00000016416	SHH	sonic hedgehog signaling molecule	54.8684	-0.98311	0.24623	-3.99265	6.53398e-05	0.00055148	33.175	22.4461	22.0865	78.2235	38.568	84.6423	56.0706	65.5722	34.6334	37.0786	45.6843	18.2054	11.1997	19.5713	34.8197	29.6445	63.7601	57.8953	37.3919	50.4814	103.727	129.498	50.1923	138.177	74.3714	84.3803	52.7071	46.0835	36.2749	59.9536	41.5432	60.814	61.7467	88.6575	42.405	71.0051	47.4429
ENSSSCG00000013873	NR2F6	nuclear receptor subfamily 2 group F member 6	2048.83	-0.981558	0.192885	-5.08883	3.60286e-07	6.96995e-06	855.178	2217.89	1674.56	2191.26	1953.65	2351.96	2578.33	2495.97	1560.08	2020.79	983.027	1028.6	515.186	1429.86	1653.94	1277.41	1783.9	1956.38	3370.77	1975.57	4165.74	2791.07	836.735	4419.21	2559.89	2215.43	2922.05	2191.78	897.467	1373.64	1420.61	2428.71	2386.83	4180.39	1157.45	2677.54	1307.74
ENSSSCG00000001433	PPT2	palmitoyl-protein thioesterase 2	284.542	-0.980258	0.194305	-5.04495	4.5364e-07	8.5103e-06	170.483	382.652	337.322	465.329	244.031	408.321	334.585	320.458	181.038	491.292	132.974	180.916	129.419	302.779	113.164	212.003	105.343	302.342	224.351	90.2841	540.166	393.399	97.4321	607.733	356.767	419.209	456.795	210.186	163.909	216.009	152.325	401.834	529.105	358.485	73.6874	340.824	81.112
ENSSSCG00000036568	MVB12A	multivesicular body subunit 12A	865.867	-0.979073	0.187619	-5.21842	1.80455e-07	3.89967e-06	546.466	1465.41	527.065	1268.62	815.539	1031.38	1146.23	742.447	497.462	682.479	258.605	435.792	414.388	564.114	830.45	799.504	543.347	527.49	2024.66	313.567	1607.78	611.191	360.794	1864.77	721.079	1359.06	984.665	1206.04	667.726	1117.96	931.871	1723.58	1303.07	1114	313.519	440.231	274.71
ENSSSCG00000035532	ATP5F1D	ATP synthase F1 subunit delta	3848.46	-0.978761	0.17698	-5.53034	3.19605e-08	8.88798e-07	2077.12	4016.78	2800.97	4779.66	4107.85	4692.95	4946.16	5485.86	3130.39	3827.21	1905.69	2280.23	1875.33	2380.79	2106.59	2857.55	1711.82	3579.86	6408.31	2160.99	7676.81	6374.83	1900.81	8460.57	5374.14	4929.07	5207.62	3265.19	1700.89	2404.32	3591.45	4786.6	4723.62	7260.28	1897.1	3854.93	1852.57
ENSSSCG00000004912	SEC11C	SEC11 homolog C, signal peptidase complex subunit	1954.48	-0.978009	0.178803	-5.46977	4.50621e-08	1.19749e-06	1336.22	2888.06	1266.96	2573.35	1252.41	2265.75	2725.4	2376.46	1236.57	1629.14	457.658	1421.16	2010.97	1424.1	2547.06	1870.3	1042.34	1137.8	5490.01	735.864	3089.32	2524.23	719.817	3824.93	1551.02	2609.51	1768.08	1266.73	1816.43	1672.53	1379.89	2917.53	3476.98	2636.6	1000.34	1403.32	971.049
ENSSSCG00000038726	RANGRF	RAN guanine nucleotide release factor	152.663	-0.977526	0.227825	-4.29069	1.78118e-05	0.000185082	64.507	231.943	59.2321	181.519	220.188	209.255	243.585	182.968	115.707	165.695	75.8685	108.095	70.9313	94.4027	62.6755	107.798	26.3357	127.852	199.057	84.4593	315.097	249.185	60.8213	254.343	229.581	143.626	212.426	118.019	77.9238	141.067	157.213	181.672	225.695	316.083	56.3083	220.761	56.6254
ENSSSCG00000002305	EXD2	exonuclease 3'-5' domain containing 2	69.0206	-0.977029	0.187486	-5.21122	1.87604e-07	4.01785e-06	48.841	61.994	35.1377	48.1375	75.0324	97.9656	83.6463	65.5722	96.8162	82.2682	89.7369	32.9973	24.8882	39.1426	33.0787	56.5941	30.494	97.2962	81.3823	67.9557	132.106	96.1423	56.0973	88.0418	100.24	97.8453	83.8522	40.4636	21.4962	35.2668	46.4306	83.1381	62.8113	106.003	74.3826	116.19	64.2775
ENSSSCG00000032446	C1orf116	chromosome 9 C1orf116 homolog	94.9443	-0.976681	0.222718	-4.38528	1.15838e-05	0.00012779	30.4104	23.515	33.1298	69.1977	54.6965	95.6145	121.333	204.12	81.8608	170.33	89.7369	45.5135	37.3323	55.2601	40.0427	49.4076	42.9688	35.3805	126.472	123.291	125.256	207	59.6403	132.063	226.348	70.0177	87.0466	28.0997	53.7406	51.1369	45.6161	107.772	86.2324	319.938	56.3083	282.729	44.382
ENSSSCG00000013767	PALM3	paralemmin 3	2120.23	-0.976316	0.240805	-4.05438	5.02675e-05	0.00044414	1107.68	1501.75	1270.98	1577.51	1274.85	1579.21	2192.27	5367.4	3452.32	4527.07	2909.92	1889.95	606.027	1496.63	973.211	685.418	673.639	1116.9	3133.22	1861.99	3065.83	4807.12	958.378	2664.49	4376.06	1407.54	1526.11	522.655	311.695	864.037	379.591	2143.12	1076.31	7586	1411.18	4846.42	1303.91
ENSSSCG00000023273	SH3YL1	SH3 and SYLF domain containing 1	51.6792	-0.976249	0.243742	-4.00525	6.19526e-05	0.00052596	19.3521	19.2395	52.2045	80.2292	28.7507	70.5353	49.6363	70.8603	88.9449	137.886	29.3684	23.8946	16.1773	32.2351	31.3377	34.1361	16.6331	28.9476	83.5818	24.2699	62.6279	104.972	30.7059	59.9173	156.288	51.1668	39.9296	8.99191	25.5268	26.4501	33.3975	56.965	53.2299	94.4395	29.1969	111.026	29.0779
ENSSSCG00000017608		phosphatidylcholine transfer protein	1319.25	-0.975072	0.276053	-3.5322	0.000412122	0.0025725	681.931	1209.95	265.038	905.587	990.848	1822.94	1616.86	1912.17	560.432	1089.18	600.422	1462.12	563.718	405.241	837.414	460.838	358.997	1248.77	2201.72	512.58	2145.01	3348.3	876.889	2428.49	1764.43	1286.35	935.152	3273.05	1039.88	1739.54	614.188	2777.43	2447.51	1998.65	733.399	990.198	707.052
ENSSSCG00000032632	CMTM4	CKLF like MARVEL transmembrane domain containing 4	50.1763	-0.974285	0.376559	-2.58733	0.00967215	0.0333547	25.8028	80.1646	22.0865	37.106	28.7507	108.938	45.0403	41.247	14.1682	26.6503	23.6579	12.5162	7.46646	26.4788	40.0427	42.221	23.5635	164.037	12.0974	7.76637	74.3707	137.346	43.1063	61.1401	246.827	87.0733	68.679	59.5714	20.1527	64.3619	43.1724	36.1805	51.1007	28.91	6.95165	23.238	14.5389
ENSSSCG00000035795		small ubiquitin like modifier 3	478.771	-0.972844	0.21687	-4.48583	7.26296e-06	8.6681e-05	416.531	504.503	310.215	840.401	466.323	756.295	796.019	554.191	333.74	673.209	283.079	323.146	281.237	234.855	179.321	325.192	97.0262	472.007	232.05	128.145	740.771	595.494	219.075	951.341	681.199	735.186	780.225	449.595	311.695	528.121	520.512	925.296	726.055	560.855	223.148	388.591	169.876
ENSSSCG00000001418	NEU1	neuraminidase 1	611.676	-0.972516	0.139579	-6.96749	3.22654e-12	2.9782e-10	269.086	699.036	406.593	1031.95	679.499	632.466	705.019	654.665	397.497	601.369	256.974	316.319	329.769	439.778	776.479	524.618	382.561	545.985	814.923	496.077	991.283	899.618	364.928	1033.27	847.187	865.347	839.321	476.571	330.504	440.835	498.518	971.484	949.621	894.284	261.382	688.104	319.092
ENSSSCG00000002269	MTHFD1	methylenetetrahydrofolate dehydrogenase, cyclohydrolase and formyltetrahydrofolate synthetase 1	2330.94	-0.972459	0.145809	-6.66941	2.56834e-11	1.81172e-09	1313.18	1636.43	1067.18	2732.81	2025.17	2615.29	3103.19	3048.05	2553.43	3048.56	1654.42	1481.46	1314.1	1912.23	2623.66	1320.53	1298.77	2166.25	2760.4	1595.02	3032.56	3953.61	993.808	4854.53	3539.65	2915.61	3294.99	1512.89	1608.19	1577.31	1001.92	2811.3	2580.58	4781.72	1784.49	3106.15	1625.3
ENSSSCG00000013896	MPV17L2	MPV17 mitochondrial inner membrane protein like 2	776.224	-0.972377	0.248177	-3.91809	8.92541e-05	0.000715393	503.154	801.646	399.566	877.507	942.463	703.785	1413.71	680.047	417.963	716.081	296.948	278.77	267.548	440.93	477.03	938.744	564.138	414.916	1760.72	414.53	2347.57	650.432	192.502	1881.89	627.307	1105.02	725.122	795.784	529.344	995.406	676.91	1230.14	1096.54	1351.06	354.534	472.506	378.013
ENSSSCG00000016959	MARVELD2	MARVEL domain containing 2	112.792	-0.97203	0.306857	-3.1677	0.00153649	0.0076049	22.1167	99.4041	59.2321	86.2464	72.2274	76.0213	60.6666	82.4941	66.1184	158.743	57.9211	54.6162	46.0432	42.5963	252.443	96.1202	38.8105	102.925	48.3895	6.79557	72.4135	200.133	63.7737	236.001	265.15	192.998	146.142	184.334	91.3589	163.991	158.027	258.652	282.118	79.0208	68.8213	91.6611	88.7641
ENSSSCG00000037568	RAB43	RAB43, member RAS oncogene family	704.576	-0.971085	0.222285	-4.36864	1.25022e-05	0.000136361	387.963	784.544	441.731	752.149	955.786	1045.49	917.352	640.916	582.471	845.856	458.474	293.562	334.746	390.275	283.781	611.755	256.426	1011.56	687.351	265.998	1506.01	1156.65	481.846	1795.07	1078.92	1003.59	875.258	482.191	267.359	633.039	777.917	892.195	864.453	875.011	316.3	810.749	304.553
ENSSSCG00000013751	NACC1	nucleus accumbens associated 1	236.488	-0.970657	0.309654	-3.13465	0.00172057	0.0083144	158.503	392.272	109.429	216.619	366.747	398.916	361.242	155.47	112.559	99.6488	197.421	121.749	93.3307	85.1927	125.351	167.087	90.0958	548.397	38.4916	122.32	502.98	324.726	254.504	469.556	269.462	451.524	551.029	296.733	124.947	230.116	280.213	222.471	338.542	117.568	145.985	58.095	150.746
ENSSSCG00000025087	ASPH	aspartate beta-hydroxylase	446.226	-0.970635	0.153999	-6.30285	2.92223e-10	1.50473e-08	232.225	585.736	387.518	676.934	403.211	721.027	587.363	368.051	381.755	405.548	236.579	374.348	260.082	276.301	572.784	336.87	184.35	455.925	524.586	127.174	730.007	690.655	158.844	756.915	688.744	631.955	561.411	342.816	405.741	425.847	304.65	632.773	784.608	431.723	199.512	404.083	261.701
ENSSSCG00000022947		AFG3 like matrix AAA peptidase subunit 2	323.674	-0.970356	0.344946	-2.81307	0.00490715	0.0192874	136.386	369.826	101.397	337.966	502.086	669.301	360.323	310.939	218.033	314.01	199.053	130.851	83.3754	123.184	45.2656	287.462	103.957	689.115	128.672	53.3938	676.186	722.049	218.484	679.878	659.642	469.478	558.216	430.488	137.038	299.768	461.048	379.51	486.521	158.042	111.922	220.761	142.329
ENSSSCG00000007371	HNF4A	hepatocyte nuclear factor 4 alpha	1955.58	-0.969787	0.232928	-4.16346	3.13461e-05	0.000297402	426.668	2274.54	455.786	1509.31	1253.11	2345.69	1265.73	1658.34	1284.59	4297.65	947.132	679.289	1437.29	977.413	2550.54	1253.16	1359.75	1862.3	2801.09	1018.37	3002.23	2702.78	487.751	3090.02	3910.43	1992.81	1593.19	3872.14	1174.23	1532.34	2398.92	2628.86	4526.67	3187.81	889.116	2770.49	938.91
ENSSSCG00000016295	NGEF	neuronal guanine nucleotide exchange factor	535.278	-0.969259	0.223967	-4.3277	1.50678e-05	0.000160215	165.875	345.242	370.451	520.487	692.822	663.815	611.262	775.233	682.436	680.161	751.343	291.286	100.797	286.662	146.243	270.394	295.237	381.948	511.389	629.076	581.265	639.641	409.805	884.086	519.522	643.624	672.415	221.426	186.748	277.726	404.028	676.652	587.658	948.249	1076.81	872.717	1030.73
ENSSSCG00000008239	CAPG	capping actin protein, gelsolin like	350.988	-0.968695	0.176454	-5.48978	4.02433e-08	1.08438e-06	165.875	318.521	288.129	657.88	305.739	397.349	577.252	406.125	220.395	332.549	145.211	145.643	177.951	244.065	398.686	396.159	270.287	229.973	498.192	311.626	439.374	310.991	174.197	629.743	393.414	520.645	451.205	243.905	251.237	198.376	336.419	648.939	553.591	676.495	171.01	335.66	163.754
ENSSSCG00000013244	PACSIN3	protein kinase C and casein kinase substrate in neurons 3	684.257	-0.968116	0.228199	-4.24242	2.21122e-05	0.000222056	305.026	744.997	623.443	730.086	333.789	709.271	823.595	1130.59	624.976	1198.1	376.079	263.978	131.907	537.635	398.686	435.685	602.949	442.256	1166.85	481.515	1062.72	907.466	224.389	1192.23	940.96	659.782	478.357	355.18	220.336	642.738	435.796	929.145	838.903	2224.15	251.65	1613.75	278.536
ENSSSCG00000038757		thiosulfate sulfurtransferase like domain containing 3	171.227	-0.967515	0.2225	-4.34837	1.3715e-05	0.000147733	62.6639	112.23	134.527	249.713	208.969	199.066	195.788	233.733	225.904	215.52	129.711	54.6162	41.0655	111.671	69.6394	121.273	70.6905	191.376	204.556	140.765	168.313	236.432	152.939	237.224	364.312	210.053	184.475	30.3477	80.6108	137.541	144.994	207.075	248.051	296.81	150.851	313.713	198.189
ENSSSCG00000010450	LIPA	lipase A, lysosomal acid type	1061.06	-0.96679	0.169228	-5.71294	1.11043e-08	3.59501e-07	582.406	985.49	716.808	1225.5	1043.44	1195.18	1095.67	2044.37	1066.55	1748.49	429.106	459.686	592.339	466.257	628.496	604.569	314.642	1142.63	1214.14	521.318	1434.57	3053.01	735.76	1576.19	3127.91	1336.62	1206.67	621.566	545.467	689.466	554.724	1237.06	1242.39	1443.57	526.935	1341.35	508.863
ENSSSCG00000035987	EHD3	EH domain containing 3	221.824	-0.96665	0.309636	-3.1219	0.0017969	0.00860182	217.481	210.566	50.1967	279.799	596.052	326.813	256.454	323.631	235.35	301.264	175.395	93.3026	84.6198	101.31	80.0853	86.2386	37.4244	320.032	288.137	223.283	521.573	378.683	287.572	437.763	268.384	136.445	310.653	78.6792	37.6184	96.1021	128.702	150.88	87.297	318.01	182.133	347.279	152.276
ENSSSCG00000001546	FANCE	FA complementation group E	28.2051	-0.96642	0.353784	-2.73167	0.0063015	0.0235922	23.0382	43.8233	18.0708	24.0688	30.8544	52.5096	47.7979	26.4404	19.6781	50.9831	39.1579	15.9297	2.48882	11.5125	3.48197	14.3731	9.70262	39.401	2.19952	9.70796	50.8852	50.0333	29.5249	63.5857	63.5929	43.0878	39.9296	28.0997	9.4046	24.6868	30.9538	21.5543	44.7131	19.2734	9.7323	19.365	9.9477
ENSSSCG00000033123	TMEM97	transmembrane protein 97	1722.84	-0.966341	0.180003	-5.36848	7.94037e-08	1.93253e-06	876.373	1140.48	804.151	1826.22	1086.22	1380.92	2174.8	2583.76	1763.16	4099.51	1310.16	1140.11	857.398	834.658	1211.73	798.606	759.577	778.37	3680.9	1297.95	1558.85	3005.92	775.914	2355.12	3148.39	1216.33	1103.66	1054.3	925.681	1367.47	846.341	2319.4	2497.55	4082.1	1175.52	4748.3	1159.29
ENSSSCG00000006560	CREB3L4	cAMP responsive element binding protein 3 like 4	45.4187	-0.965626	0.248113	-3.89188	9.94722e-05	0.000785323	44.2334	24.5838	26.1023	61.1748	35.7631	65.8329	92.8382	49.708	22.8266	35.9199	33.4474	14.7919	34.8435	18.42	33.0787	45.8143	38.8105	34.5764	102.278	11.6496	97.8561	78.4835	14.7624	72.1454	36.6468	32.3159	38.3324	35.9676	25.5268	22.9234	30.1392	65.4328	47.9069	117.568	29.1969	78.7511	29.8431
ENSSSCG00000013226	PTPMT1	protein tyrosine phosphatase mitochondrial 1	1049.75	-0.964206	0.148183	-6.50684	7.67471e-11	4.60828e-09	452.47	861.502	771.021	1648.71	1004.87	1424.81	1417.39	1421.44	894.172	903.792	599.606	802.175	582.384	734.499	779.961	893.828	429.688	964.921	1737.62	488.311	1319.1	1489.23	643.642	1768.17	1448.63	1444.34	1524.51	684.509	652.948	863.155	766.513	1529.59	1559.64	1686.42	747.997	1127.04	772.095
ENSSSCG00000012138	ACE2	angiotensin I converting enzyme 2	68.8034	-0.963988	0.295223	-3.26528	0.00109355	0.00577103	15.666	27.7904	29.1141	66.1891	59.6052	47.0235	51.4747	62.3994	44.866	161.06	58.7369	42.1	18.6661	34.5376	13.9279	17.9664	15.247	37.7928	60.4868	45.6274	104.706	229.564	46.0588	61.1401	272.695	18.8509	131.768	26.9757	55.0841	17.6334	26.0663	78.5193	45.7777	134.914	99.4085	197.523	88.7641
ENSSSCG00000016618	CPED1	cadherin like and PC-esterase domain containing 1	437.042	-0.961815	0.195421	-4.92176	8.57689e-07	1.43802e-05	236.833	453.197	236.928	523.496	230.006	423.212	488.09	709.661	856.39	712.605	213.737	286.735	266.304	381.065	238.515	192.24	109.501	689.115	599.37	279.589	516.68	1086.02	344.851	742.241	1161.92	403.051	404.886	189.954	236.458	185.151	138.477	282.516	282.118	618.675	441.43	650.665	358.882
ENSSSCG00000035887	C8orf34	chromosome 4 C8orf34 homolog	30.7338	-0.961701	0.275644	-3.48893	0.000484958	0.00293723	10.1368	23.515	9.0354	33.0946	32.2569	61.9143	41.3636	60.2841	43.2918	31.2851	29.3684	13.654	16.1773	14.9663	17.4099	33.2378	9.70262	47.442	32.9928	6.79557	23.4855	56.9006	24.8009	42.7981	56.048	61.9387	36.7353	14.6118	29.5573	18.5151	17.9206	29.2523	19.1628	26.9827	37.5389	23.238	49.7385
ENSSSCG00000014948	C11orf54	chromosome 9 C11orf54 homolog	431.749	-0.96138	0.177541	-5.41497	6.12987e-08	1.55287e-06	151.131	309.97	281.101	858.453	382.876	421.644	556.11	647.261	552.561	560.814	169.684	253.738	282.481	282.057	579.748	374.599	227.319	300.734	713.745	398.026	335.646	554.29	445.235	506.24	559.402	595.151	431.24	176.466	279.451	283.898	276.955	563.492	685.601	732.388	348.277	577.077	319.857
ENSSSCG00000004181	VNN1	vanin 1	414.381	-0.961073	0.267992	-3.5862	0.000335533	0.00217664	322.535	121.85	185.728	242.693	328.88	339.353	374.11	781.579	701.327	1026.61	303.474	105.819	115.73	103.613	71.3804	114.985	148.312	340.135	654.358	483.457	430.567	1190.01	466.493	667.65	1676.05	261.22	358.568	98.911	53.7406	195.731	203.643	279.436	215.049	851.883	384.426	716.506	416.273
ENSSSCG00000028203		transferrin	1484.74	-0.960829	0.269908	-3.55984	0.000371076	0.00236477	621.11	1318.98	437.715	1347.85	687.914	1300.98	1260.21	2945.46	1260.18	3058.99	684.448	1121.91	944.507	590.592	409.132	673.739	139.995	1374.21	1449.48	299.976	2186.11	3594.55	451.14	3230.65	4414.86	1527.82	1416.7	2291.81	984.796	1279.3	751.036	2041.5	1385.04	3575.21	636.771	2529.07	711.643
ENSSSCG00000036091	MORC4	MORC family CW-type zinc finger 4	1261.59	-0.960001	0.220093	-4.36179	1.29001e-05	0.000140085	574.112	1608.64	1091.28	1668.77	598.155	1807.27	1916.51	1338.94	1225.55	2441.4	841.08	928.475	907.175	1195	1934.23	484.194	748.488	1376.62	1369.2	295.122	2358.33	2314.28	283.439	1493.04	2164.32	1367.14	1506.94	1434.21	900.154	670.07	500.148	1660.45	1847.08	1950.46	196.732	1465.29	216.554
ENSSSCG00000004873	FBXO15	F-box protein 15	15.9696	-0.959234	0.33318	-2.87902	0.00398912	0.0162916	3.68611	8.55089	6.0236	16.0458	20.3359	29.7816	18.3838	22.2099	18.1038	11.5871	8.1579	1.13784	14.9329	11.5125	12.1869	12.5765	2.77218	7.23691	40.6912	14.5619	23.4855	23.5451	7.08597	12.228	20.4791	9.87429	6.38874	4.49595	16.1222	15.8701	18.7352	31.5617	40.4547	34.6921	10.4275	21.947	13.0085
ENSSSCG00000004573		C2 calcium-dependent domain-containing protein 4A	615.018	-0.955444	0.220266	-4.33768	1.43996e-05	0.000153676	423.903	690.485	353.385	663.897	753.83	916.958	1110.38	510.829	258.964	216.678	219.448	401.656	299.903	295.872	661.574	388.074	881.553	896.573	1019.48	618.397	660.529	602.361	233.837	1653.23	425.749	1124.77	868.07	428.24	450.077	372.065	695.645	1033.84	724.991	909.703	385.816	220.761	384.134
ENSSSCG00000003148	DBP	D-box binding PAR bZIP transcription factor	87.6852	-0.955215	0.316342	-3.01956	0.0025314	0.0113069	15.666	22.4461	112.441	93.2665	31.5557	63.4817	84.5655	151.239	70.054	260.709	59.5527	18.2054	12.4441	70.2264	83.5673	63.7807	67.9184	44.2256	112.176	138.824	66.5422	60.8248	51.9638	133.286	88.3834	76.3014	80.6579	15.7358	40.3054	28.2135	43.9869	144.722	83.0386	279.464	72.2971	318.877	83.4076
ENSSSCG00000022309	GPR34	G protein-coupled receptor 34	27.5195	-0.951724	0.388024	-2.45275	0.014177	0.0452398	6.4507	1.06886	4.01573	17.0487	8.41485	7.83725	4.59595	88.8398	121.217	110.077	27.7369	3.41351	6.22205	10.3613	3.48197	4.4916	4.15827	8.84511	37.3919	42.715	13.6999	40.2228	105.699	6.11401	93.7726	2.69299	7.98593	4.49595	1.34351	5.29002	5.70201	17.7053	10.646	48.1834	37.5389	65.8411	32.9039
ENSSSCG00000051205	P2RX4	purinergic receptor P2X 4	218.142	-0.951401	0.311302	-3.0562	0.00224158	0.0102661	114.269	173.156	58.2281	247.708	183.023	281.357	324.474	207.293	235.35	246.805	161.526	88.7513	87.1087	63.3189	59.1935	157.206	56.8296	374.711	109.976	77.6637	403.167	362.986	115.147	611.401	431.139	255.834	245.168	499.051	112.855	186.914	360.856	280.976	178.852	258.263	146.68	171.703	142.329
ENSSSCG00000015120	USP2	ubiquitin specific peptidase 2	195.126	-0.950697	0.250249	-3.79901	0.000145276	0.00108223	58.0563	134.677	119.468	200.573	90.4596	168.501	130.525	169.219	75.5638	656.987	125.632	60.3054	140.618	158.873	208.918	44.916	163.559	93.2757	356.323	211.634	187.884	280.579	97.4321	147.959	383.713	187.612	90.241	104.531	75.2368	104.037	60.2784	313.308	221.436	869.229	90.3714	530.601	107.129
ENSSSCG00000032562	TMC6	transmembrane channel like 6	563.462	-0.950684	0.297133	-3.19952	0.00137657	0.00696503	307.79	395.479	1163.56	1270.63	519.617	593.28	680.201	363.82	486.442	414.817	408.711	105.819	220.26	684.995	494.44	324.293	261.971	677.053	192.458	331.042	380.66	355.138	246.238	1744.94	350.3	1275.58	1352.02	418.124	408.428	313.875	571.015	1058.47	355.576	439.433	633.99	404.083	643.54
ENSSSCG00000035762		CDGSH iron sulfur domain 1	473.223	-0.950206	0.262725	-3.61673	0.000298345	0.00197377	140.994	116.506	221.869	413.18	474.036	426.346	489.928	1185.59	846.945	498.244	470.711	207.086	92.0863	184.2	282.04	379.091	278.604	277.415	1126.16	721.302	463.838	968.291	427.52	396.188	908.624	412.925	366.554	78.6792	135.695	151.647	157.213	366.424	270.408	1620.89	522.764	892.082	537.176
ENSSSCG00000017316	NSF	N-ethylmaleimide sensitive factor, vesicle fusing ATPase	190.491	-0.94993	0.162146	-5.8585	4.67072e-09	1.70275e-07	76.4868	189.189	155.61	339.971	183.023	337.002	260.131	162.873	98.3904	172.647	76.6843	120.611	134.396	130.092	196.731	196.732	85.9375	242.839	160.565	70.8681	255.404	286.465	101.566	266.571	279.162	357.27	273.119	121.391	155.848	186.032	180.835	274.048	414.128	179.242	83.4198	151.047	91.8249
ENSSSCG00000012618	SOWAHD	sosondowah ankyrin repeat domain family member D	15.9552	-0.949054	0.282324	-3.36158	0.000774987	0.00438057	23.0382	26.7215	8.03147	24.0688	17.5309	28.9978	34.9292	21.1523	15.7425	27.809	12.2369	3.41351	3.73323	12.6638	1.74099	9.88151	12.4748	20.1025	17.5962	13.5911	39.1424	16.6778	25.9819	20.7876	19.4012	12.5673	28.7493	4.49595	4.03054	7.05336	13.0332	14.6261	6.38759	15.4187	6.25648	10.328	9.9477
ENSSSCG00000035628	CCDC115	coiled-coil domain containing 115	244.266	-0.947806	0.212602	-4.45812	8.26804e-06	9.70739e-05	146.523	165.674	165.649	332.951	192.139	222.578	301.494	475.927	334.527	432.198	155	128.576	146.84	150.814	189.767	108.697	127.52	106.141	697.248	210.663	220.176	293.332	168.882	287.359	273.773	178.635	142.149	100.035	103.451	175.452	117.298	307.919	261.891	576.274	230.795	602.897	206.606
ENSSSCG00000040275	HEBP1	heme binding protein 1	1044.61	-0.947283	0.211147	-4.48637	7.24455e-06	8.65208e-05	564.897	748.203	505.982	1249.57	1006.28	849.558	1060.75	2230.51	1771.81	1577	1338.71	854.516	457.943	683.844	1129.9	503.059	421.371	713.238	1334.01	458.216	1212.44	1735.47	360.794	1433.12	1835.57	1051.16	1034.98	486.687	472.917	502.552	435.796	1414.12	1115.7	3461.5	417.794	1844.84	375.717
ENSSSCG00000017761	UNC119	unc-119 lipid binding chaperone	147.895	-0.946988	0.16928	-5.59422	2.2162e-08	6.49624e-07	91.2313	88.7155	128.503	267.765	82.0448	139.503	207.737	274.98	177.103	339.501	123.184	84.1999	63.4649	119.73	151.466	97.0185	92.868	85.2347	193.558	118.437	166.355	187.379	86.8032	264.125	219.881	168.761	145.344	87.6711	76.5803	62.5986	82.2718	227.86	153.302	267.9	91.0666	176.867	81.112
ENSSSCG00000034358	KCNJ16	potassium inwardly rectifying channel subfamily J member 16	56.6895	-0.945362	0.27519	-3.4353	0.000591891	0.00347015	7.37223	26.7215	11.0433	15.043	31.5557	34.4839	46.8787	153.354	107.049	177.282	96.2632	27.3081	22.3994	6.90751	15.6689	10.7798	4.15827	15.2779	47.2897	39.8026	42.0781	251.147	51.9638	55.0261	205.869	26.9299	23.9578	12.3639	9.4046	20.2784	30.1392	33.8711	30.8733	158.042	42.405	161.375	45.1473
ENSSSCG00000008010	CHTF18	chromosome transmission fidelity factor 18	75.7232	-0.94522	0.203886	-4.63601	3.55196e-06	4.81797e-05	53.4486	71.6137	30.118	100.287	83.4472	91.6958	85.4847	82.4941	43.2918	126.299	59.5527	44.3756	27.377	63.3189	73.1214	42.221	36.0383	42.6174	90.1804	142.707	122.32	108.896	60.8213	125.949	77.6049	81.6873	97.4283	33.7196	30.9008	34.3851	48.0598	81.5985	57.4883	163.824	91.7617	125.227	70.3991
ENSSSCG00000015293		membrane cofactor protein-like	21.7266	-0.945068	0.270852	-3.48925	0.000484386	0.0029349	8.29375	9.61975	13.0511	30.086	14.0247	21.9443	31.2525	19.0371	46.4403	25.4916	15.5	3.41351	16.1773	11.5125	17.4099	24.2546	12.4748	16.8861	39.5914	22.3283	9.78561	44.147	34.2489	20.7876	25.8683	23.3392	24.7564	3.37196	18.8092	7.05336	8.14573	20.0147	27.6795	32.7647	38.2341	23.238	42.8516
ENSSSCG00000033997		zinc finger and SCAN domain-containing protein 2-like	10.909	-0.944732	0.392347	-2.4079	0.0160447	0.0498699	7.37223	3.20658	5.01967	12.0344	4.90866	6.2698	11.9495	20.0947	9.44548	38.2373	11.4211	2.27567	6.22205	3.45376	0	8.08487	9.70262	9.64921	29.6935	9.70796	13.6999	15.6967	7.67647	12.228	18.3234	5.38598	6.38874	0	2.68703	0.88167	4.07286	3.84899	5.32299	32.7647	5.56132	54.222	6.12166
ENSSSCG00000002486		serpin A3-5	86714.8	-0.94377	0.28163	-3.3511	0.000804926	0.00451889	105329	132265	81979.2	179298	59267.9	126411	123915	11371.5	1887.52	6035.71	6058.87	80695.4	44024.7	111598	194290	45234.9	58736.9	109945	69410.3	1589.19	218971	17283.1	918.814	271522	4830.91	138166	147525	151089	192727	124095	67505.3	138861	127340	41564.9	4877.27	7267.04	4562.17
ENSSSCG00000000734	TSPAN11	tetraspanin 11	209.446	-0.942025	0.309519	-3.04351	0.00233835	0.0106196	147.445	160.329	77.3029	151.433	148.662	137.936	181.081	391.318	340.037	417.135	217.816	18.2054	23.6438	103.613	40.0427	120.375	62.374	85.2347	394.814	821.294	279.869	304.124	327.136	169.97	412.815	61.0411	145.344	30.3477	40.3054	67.007	96.1196	120.088	94.7492	580.128	267.638	447.977	264.762
ENSSSCG00000006388	DCAF8	DDB1 and CUL4 associated factor 8	348.507	-0.94179	0.258503	-3.64324	0.000269227	0.00180452	189.835	349.518	114.448	392.12	480.348	692.029	452.242	298.248	324.295	404.389	314.079	223.016	186.661	99.0077	168.876	182.359	106.729	592.623	238.648	240.757	666.4	718.124	213.76	518.468	781.439	517.952	496.725	379.908	186.748	335.035	317.683	300.991	464.165	136.841	243.308	334.369	232.623
ENSSSCG00000039148	P4HB	prolyl 4-hydroxylase subunit beta	22412.7	-0.941402	0.182559	-5.15671	2.5132e-07	5.16114e-06	14363.9	26820.9	9950.99	23320.6	19800.8	25883.3	31015.3	21970.9	10453	21324.9	10123.1	13020.3	15532.7	12077.8	16078	22138.2	11978.6	18162.2	24205.7	10282.7	63052.6	34110.9	10042.6	51897	26360.9	37235.1	29140.6	27362.4	15110.5	22707.4	20619.3	32983.5	35245.6	29330.2	11081.6	14683.8	9800.78
ENSSSCG00000004195	ARG1	arginase 1	16624.5	-0.940937	0.195428	-4.81476	1.47377e-06	2.31024e-05	7464.38	18775.6	13044.1	38373.6	14887.3	26533.8	28536.3	17725.7	2096.9	18598.4	2782.66	11806.2	9109.08	19810.7	15917.8	29841.3	9762.22	19929.6	23660.3	5636.44	20478.4	17391	3306.79	26350.2	15913.3	29595.9	29306	12371.7	10498.2	6370.07	14906.7	26441	32271.1	19092.2	2004.85	12516.3	1998.72
ENSSSCG00000011437	ALAS1	aminolevulinate, delta-, synthase 1 pseudogene	1001.76	-0.940777	0.173266	-5.42966	5.64603e-08	1.44507e-06	740.909	1150.1	438.719	1126.22	455.103	1072.92	978.938	1213.09	507.695	2754.25	462.553	563.229	1151.08	498.492	1229.14	397.955	536.416	811.338	2026.86	308.713	1723.25	1863	366.109	1191.01	1780.6	798.92	853.696	702.493	702.658	771.462	563.684	1034.61	1505.34	2389.9	369.132	1737.69	287.718
ENSSSCG00000023996	CASC4	cancer susceptibility 4	316.709	-0.940342	0.142421	-6.60257	4.04096e-11	2.6362e-09	161.267	319.59	251.987	526.504	371.656	394.997	372.272	386.03	403.794	393.961	197.421	178.64	186.661	174.99	423.059	229.97	116.431	309.579	388.216	285.414	314.118	409.095	252.733	386.406	438.683	490.124	324.229	129.259	216.306	213.364	232.153	397.985	430.097	416.305	320.471	299.512	374.952
ENSSSCG00000007845	UQCRC2	cytochrome b-c1 complex subunit 2, mitochondrial	882.119	-0.940067	0.27985	-3.35919	0.000781716	0.00441286	544.623	997.248	577.262	936.676	1424.21	1507.1	877.827	1195.11	748.554	848.174	312.448	312.905	263.815	400.636	323.823	722.249	277.218	1554.33	969.989	268.911	2104.89	1660.91	573.964	2015.18	1734.25	1220.82	1306.5	950.894	229.741	609.234	1074.42	825.223	1166.8	855.737	223.148	735.871	287.718
ENSSSCG00000040931	SLC17A9	solute carrier family 17 member 9	947.214	-0.939417	0.213777	-4.39439	1.11086e-05	0.000123095	739.066	2178.34	702.753	1256.59	1225.06	1583.91	1697.74	575.343	861.113	679.003	1016.47	846.551	364.612	566.416	529.259	773.453	640.373	983.416	846.816	335.896	2537.41	888.826	358.432	2440.71	460.24	1195.69	1384.76	849.735	581.742	661.253	1058.94	1030.76	1481.92	364.267	519.983	298.221	531.819
ENSSSCG00000010108		kelch like family member 22	120.389	-0.937183	0.173364	-5.40586	6.44983e-08	1.62475e-06	78.3299	123.988	38.1495	176.504	87.6547	115.991	143.394	120.568	105.475	166.854	101.158	58.0297	48.532	80.5877	90.5312	101.51	121.976	78.8019	167.164	70.8681	178.098	196.209	85.6222	222.55	173.533	158.886	128.573	65.1913	55.0841	57.3086	108.338	130.866	138.398	258.263	99.4085	219.47	102.538
ENSSSCG00000006358	NDUFS2	NADH:ubiquinone oxidoreductase core subunit S2	934.847	-0.936417	0.20437	-4.58198	4.60598e-06	5.99606e-05	656.128	1056.04	382.499	1317.76	1372.32	1510.24	1136.12	1400.28	966.587	1213.17	584.922	497.235	466.654	539.937	289.004	747.402	266.129	1171.58	1303.22	439.771	1541.23	1543.18	538.534	1477.15	1465.87	1303.41	1389.55	744.08	420.52	718.561	818.646	1057.7	1250.9	1058.11	503.994	948.886	492.029
ENSSSCG00000014079	ANKRD31	ankyrin repeat domain 31	6.37385	-0.935175	0.38083	-2.45562	0.0140641	0.0449705	2.76458	5.34431	3.0118	7.02006	2.80495	10.9722	5.51514	5.28808	6.29699	12.7458	12.2369	10.2405	3.73323	3.45376	3.48197	1.79664	4.15827	6.43281	7.69833	5.82478	0.978561	3.92418	2.36199	7.33682	9.70062	8.97663	3.19437	3.37196	2.68703	7.93503	2.44372	10.7772	17.0336	0	10.4275	11.619	12.2433
ENSSSCG00000023936	MYRFL	myelin regulatory factor like	7.1631	-0.935067	0.381166	-2.45318	0.0141601	0.0451941	2.76458	5.34431	14.0551	8.02292	1.40247	6.2698	14.707	3.17285	0.787123	2.31741	1.63158	6.82702	3.73323	3.45376	12.1869	0.898319	16.6331	4.82461	14.2969	0	14.6784	15.6967	0.590498	14.6736	7.54492	20.6462	9.58311	5.61994	1.34351	9.69838	4.88744	14.6261	9.58138	3.85467	0.695165	6.45501	1.53042
ENSSSCG00000032053	ST8SIA5	ST8 alpha-N-acetyl-neuraminide alpha-2,8-sialyltransferase 5	34.544	-0.934121	0.312556	-2.98865	0.00280215	0.0122267	26.7243	38.479	18.0708	38.1089	55.3977	39.1863	38.606	35.959	48.8016	54.4592	26.1053	6.82702	6.22205	19.5713	1.74099	21.5597	5.54436	29.7517	83.5818	61.1602	54.7994	53.9574	44.8778	40.3525	38.8025	16.1579	51.1099	14.6118	10.7481	20.2784	26.0663	22.3241	26.6149	59.7474	33.3679	67.1321	41.3212
ENSSSCG00000047361		-	8.60415	-0.93371	0.3595	-2.59725	0.00939744	0.0326082	6.4507	4.27545	4.01573	9.02579	3.50619	0.783725	7.35352	11.6338	7.08411	12.7458	17.1316	3.41351	1.24441	6.90751	8.70493	2.69496	2.77218	5.62871	15.3967	24.2699	10.7642	13.7346	12.4005	14.6736	14.012	8.97663	7.98593	0	2.68703	3.52668	5.70201	4.61878	2.1292	23.128	19.4646	10.328	9.18249
[truncated: 4,593 more rows]

## Sheet: SEhvslsingleplot
group	GeneName	SULT1B1		HPD	SGK2		ACSM4	R3HDML	SLC13A2	FAM177B	GLOD5	DAO			SPOCK1	BHMT	ELMOD1	SLC23A3	C3orf85	P2RY4	SLC51A			PITX3	CYP8B1	UPB1		RGN	SULT1A3	UROC1	LPO	OTC		SFTPD	COL11A2		PDZK1	CIDEC	APOA2		ETNPPL	ATP6V1B1	DGKK	PLCH2	GNMT	HMGCS2	SLC16A6
[truncated: 37 more rows]
[truncated: 5,000 more columns]

## Sheet: DEG_CONHighvsLow
ENSID	GeneName	GeneDescription	baseMean	log2FoldChange	lfcSE	stat	pvalue	padj	IAIPSliver1	IAIPSliver2	IAIPSliver3	IAIPSliver4	IAIPSliver5	IAIPSliver6	IAIPSliver7	IAIPSliver8	IAIPSliver9	IAIPSliver10	IAIPSliver11	IAIPSliver12	IAIPSliver13	IAIPSliver14	IAIPSliver15	IAIPSliver16	IAIPSliver17	IAIPSliver18	IAIPSliver19	IAIPSliver20	IAIPSliver21	IAIPSliver22	IAIPSliver23	IAIPSliver24	IAIPSliver25	IAIPSliver26	IAIPSliver27	IAIPSliver29	IAIPSliver30	IAIPSliver31	IAIPSliver32	IAIPSliver34	IAIPSliver35	IAIPSliver36	IAIPSliver37	IAIPSliver38	IAIPSliver39
[truncated: 4,356 more rows]

[truncated: 6 more sheets: HighSEvsHighCON, overlapped, PEforoverlap, LowSEvsLowCon, Sheet2, Sheet3]
