# Supplementary material for: Altered hepatic metabolism mediates sepsis preventive effects of reduced glucose supply in infected preterm newborns
Source: eLife. 2025 Feb 24;13:RP97830. doi: 10.7554/eLife.97830 (PMC11850001; doi:10.7554/eLife.97830)
Supplement: Figure 3—source data 1. [file elife-97830-fig3-data1.xlsx]

## Sheet: OCCURANCE OF METABOLITES
0	intervals_class(1=Known,2=Unk,3=bin,4=left_out)	1	1	1	1	1	1	1	1	1	1	1	1	1	1	1	1	1	1	1	1	1	1	1	1	1	1	1	1	1	1	1	1	1	1	1	1	1	1	1	1	1	1	1	1	1	1	1	1
0	mean_ppm	0.000670079	0.666727	0.871327	0.976301	0.989442	1.01939	1.05163	1.08265	1.13491	1.15416	1.17326	1.17739	1.18365	1.1893	1.27839	1.3389	1.41682	1.49109	1.57757	1.92198	2.1466	2.36434	2.40743	2.65237	2.6947	2.75398	3.04522	3.29123	3.35632	3.36029	3.36824	3.66987	3.89479	3.93314	4.07586	4.12216	4.22255	4.90648	5.191	5.20979	5.23959	5.31293	5.43746	6.52388	6.87211	7.00734	7.06723	7.18275
0	signal_to_noise	83.686	21.7007	52.4153	47.7423	50.8823	25.026	53.8242	23.3778	16.9831	38.6425	44.8026	31.1443	45.7292	31.931	19.7526	47.9491	34.7613	55.8559	30.0194	33.3297	43.8421	47.9524	45.0341	46.2299	15.5659	39.0437	28.2271	49.6576	23.9465	34.4018	33.9918	40.4612	60.5255	20.8003	65.5726	54.1251	33.1681	21.3123	20.378	17.7516	57.1258	45.7181	47.7515	6.85146	14.5139	13.8823	26.203	16.1666
0	occurance	1	1	1	1	1	1	1	1	1	1	1	1	1	1	1	1	1	1	1	1	1	1	1	1	1	1	1	1	1	1	1	1	1	1	1	1	1	1	1	1	1	1	1	1	1	1	1	1
0	std_ppm	6.70725e-05	0.00227825	0.0166065	0.000160878	8.37112e-05	0.00594959	0.00438218	0.00523863	0.0057497	0.0050147	9.28017e-05	0.000803219	9.05395e-05	0.00232074	0.00736059	0.00482637	0.00400918	0.00343971	0.00884563	7.68955e-05	6.76779e-05	0.0021549	7.62889e-05	0.000325917	0.00219357	0.00493781	0.000224755	7.29013e-05	0.000196977	7.52871e-05	8.98359e-05	0.00238677	0.000660031	0.000444225	7.94326e-05	5.0224e-05	0.00594669	0.000763347	0.00106835	0.00275023	0.00234594	0.00788119	0.00386056	0.00228292	0.00531838	0.00383005	0.000238055	0.000305041
0	max_ppm_difference	0.0001528	0.00657042	0.0290321	0.000611202	0.000305601	0.0148216	0.0119184	0.0119184	0.0169609	0.0110016	0.000305601	0.00244481	0.000305601	0.0160441	0.0297961	0.0116128	0.0149744	0.0120712	0.056689	0.0001528	0.0001528	0.0155856	0.0001528	0.00229201	0.00397281	0.0102376	0.00168081	0.0001528	0.000764002	0.0001528	0.0001528	0.00733442	0.00397281	0.00168081	0.0001528	0.0001528	0.0149744	0.00183361	0.00550082	0.014516	0.00626482	0.0247537	0.00977923	0.0105432	0.0146688	0.0236841	0.000764002	0.0010696
0	mean_signal	2.26761e+06	4579.17	38894	9388.83	39851	12549.9	35784.6	5103.28	2969.42	18109.1	11556.7	4491.44	11746.6	10750.1	110964	773888	19680.6	107038	16086.2	27886.2	114878	29503.5	29748.3	31092.8	1873.05	20876.3	9323.91	270327	7948.05	15229.1	5319.66	43374	241039	7744.26	251286	142567	34897.7	1763.73	1793.5	2222.38	168404	28525.5	24720.5	1529.42	2950.98	1815.24	10271	2111.86
0	noise	202185	2.08261e+07	2.55492e+06	21029	274905	1.10942e+07	114140	2.29244e+06	3.32592e+06	782367	31050.6	106351	26242.8	1.15062e+06	1.48471e+10	1.61844e+08	1.01021e+07	624715	4.77831e+07	2.7319e+06	4.4348e+06	664397	233795	547444	3.26146e+06	6.49474e+06	1.05273e+06	1.32659e+07	5.35663e+06	661735	96496.1	3.88946e+06	1.88759e+06	5.20304e+06	355020	1.55669e+06	1.08822e+07	452169	626729	5.20408e+06	1.53626e+06	3.28587e+06	302824	6.3283e+06	8.02269e+06	7.80655e+06	6.10847e+06	1.57388e+06
0	number_of_iter_align	1	1	5	1	1	1	1	1	1	1	1	5	1	1	1	1	1	1	5	1	1	1	1	1	1	1	5	1	5	1	1	1	1	5	1	1	5	1	1	5	1	5	5	5	1	5	1	1
0	mcr_exp_variation	99.9988	99.9878	99.8568	99.9968	99.9891	99.9849	99.9987	99.9914	99.9779	99.994	99.9942	99.9863	99.9952	99.9467	99.9257	99.9972	99.9943	99.9987	99.9922	99.9945	99.9982	99.9961	99.9945	99.9928	99.7865	99.9734	99.9935	99.9986	99.9698	99.9957	99.9953	99.9782	99.9852	99.9768	99.9983	99.9961	99.9973	99.9892	99.9726	99.9715	99.9989	99.9842	99.9994	99.9015	99.9817	99.9577	99.9972	99.9734
0	ss_corr	0.996405	0.741647	0.788986	0.394199	0.686555	0.550477	0.717546	0.402375	0.259007	0.649555	0.65765	0.199163	0.62582	0.600233	0.601279	0.5286	0.633294	0.655815	0.541854	0.351969	0.861178	0.713817	0.315503	0.872068	0.71962	0.727425	0.455917	0.974668	0.649139	0.852392	0.726365	0.66435	0.640709	0.370963	0.96432	0.572365	0.50534	0.55176	0.523116	0.187354	0.515339	0.644482	0.496308	0.432287	0.536959	0.492385	0.74097	0.509676
0	intervals_name	TSP	cholesterol	LP (CH3)	leucine 1	Valine 1	isoleucine 1	valine 2	isobutyric acid	2-oxoisovaleric acid	propylene glycol	2-propanol 1	ethanol 1	2-propanol 2	ethanol 2	LP (CH2)	lactate 1	lysine	alanine	LP (CH2CCO) 1	acetate	methionine	glutamate	succinate	methionine 2	aspartic acid 1	LP (C=CCH2C=C)	creatine 1	myo-Inositol 1	proline 1	methanol	proline 2	isoleucine 2	glucose 1	creatine 2	myo-Inositol 2	lactate 2	sucrose 1	β-mannose	α-mannose	LP (CHOCOR)	glucose 2	LP (CH of unsaturated lipids)	sucrose 2	fumarate	tyrosine 1	1-methylhistidine 1	histidine 1	tyrosine 2
0	Variable #	1	2	3	4	5	6	7	8	9	10	11	12	13	14	15	16	17	18	19	20	21	22	23	24	25	26	27	28	29	30	31	32	33	34	35	36	37	38	39	40	41	42	43	44	45	46	47	48
Samples #	Samples Names	0	0	0	0	0	0	0	0	0	0	0	0	0	0	0	0	0	0	0	0	0	0	0	0	0	0	0	0	0	0	0	0	0	0	0	0	0	0	0	0	0	0	0	0	0	0	0	0
1	TITLE 1	0.999175	0.860417	0.947965	0.136367	0.612355	0.376508	0.671856	0.170489	0.0748154	0.287673	0.842684	0.00897905	0.799733	0.418937	0.964518	0.560236	0.585899	0.828531	0.762585	0.251743	0.690718	0.235303	0.371922	0.738815	0.637516	0.920267	0.104702	0.994609	0.518551	0.92581	0.53494	0.402485	0.739724	0.116187	0.993695	0.57186	0.0390782	0.229299	0.444667	0.546184	0.766897	0.965675	0.00824874	0.398482	0.763967	0.401289	0.851711	0.758044
2	TITLE 1	0.999458	0.852855	0.947129	0.136172	0.612379	0.372137	0.674238	0.14952	0.0724	0.288416	0.854183	0.0108613	0.798196	0.420339	0.96408	0.565458	0.588185	0.831755	0.758726	0.257214	0.700434	0.236922	0.377077	0.736969	0.62652	0.920594	0.107528	0.994535	0.534189	0.930602	0.532904	0.40589	0.740308	0.0969641	0.992477	0.584025	0.0210392	0.211123	0.441314	0.506909	0.771134	0.965221	0.0168647	0.350304	0.762272	0.431254	0.86024	0.662693
3	TITLE 2	0.997079	0.458174	0.653643	0.520765	0.725844	0.629158	0.719371	0.141322	0.0103493	0.40973	0.357892	0.00285261	0.288589	0.150541	0.357634	0.598937	0.54112	0.68377	0.415613	0.368621	0.922796	0.972978	0.411328	0.910806	0.863094	0.456427	0.441022	0.97561	0.527941	0.700708	0.35794	0.73357	0.442061	0.0215565	0.974251	0.642102	0.0558338	0.662081	0.367214	0.0388707	0.412637	0.34586	0.0282193	0.593097	0.420852	0.156079	0.724287	0.286455
4	TITLE 2	0.998966	0.450025	0.65852	0.51622	0.725247	0.627026	0.71976	0.144523	0.0103571	0.417488	0.378776	0.002319	0.288351	0.156155	0.358487	0.59369	0.539937	0.679432	0.416702	0.359571	0.916414	0.974089	0.406505	0.910067	0.851215	0.459691	0.457287	0.973945	0.5239	0.708334	0.362474	0.731685	0.442158	0.0139271	0.975169	0.627879	0.0553702	0.700332	0.374786	0.0372457	0.408848	0.344845	0.0225623	0.588792	0.422438	0.146072	0.718622	0.257507
5	TITLE 3	0.999279	0.578277	0.838329	0.511664	0.860736	0.825225	0.939282	0.0812805	0.0469309	0.755793	0.913135	0.20025	0.942577	0.895266	0.938475	0.269496	0.664227	0.801007	0.664083	0.320137	0.946936	0.536951	0.218791	0.930018	0.676737	0.805815	0.686687	0.951852	0.75586	0.789998	0.862421	0.735073	0.395927	0.529471	0.934839	0.32327	0.110273	0.525392	0.835618	0.475065	0.275869	0.933082	0.00558765	0.211715	0.289453	0.226568	0.852835	0.161485
6	TITLE 3	0.998104	0.577547	0.839468	0.482805	0.862576	0.83121	0.942423	0.0818097	0.0481514	0.754326	0.894086	0.202138	0.941884	0.903592	0.939313	0.271186	0.668189	0.803405	0.669898	0.320989	0.954757	0.534823	0.223723	0.930019	0.675297	0.809227	0.744525	0.952979	0.749433	0.803134	0.863813	0.73808	0.396881	0.550175	0.93629	0.328199	0.0899014	0.590803	0.851219	0.538927	0.277334	0.935077	0.00929467	0.101301	0.180817	0.243248	0.853235	0.274143
7	TITLE 4	0.997698	0.653334	0.933887	0.849804	0.918965	0.909631	0.933746	0.280346	0.0658861	0.626079	0.729824	0.121839	0.718416	0.431433	0.891586	0.66607	0.529272	0.819965	0.871041	0.912755	0.974413	0.547743	0.848076	0.980908	0.863713	0.963235	0.723464	0.982376	0.711625	0.857013	0.663435	0.633466	0.646917	0.59889	0.958824	0.663333	0.0622959	0.661265	0.565379	0.356727	0.613652	0.908407	0.0134382	0.643355	0.545107	0.615869	0.867219	0.47335
8	TITLE 4	0.998021	0.667208	0.940096	0.849924	0.920687	0.915527	0.932416	0.295539	0.0658075	0.661232	0.723672	0.132577	0.705467	0.475637	0.903534	0.662758	0.538269	0.815971	0.885775	0.904483	0.970467	0.556829	0.84091	0.979236	0.857141	0.96473	0.704806	0.983238	0.694142	0.835194	0.612703	0.624618	0.646572	0.6156	0.95995	0.6509	0.0575885	0.636192	0.528565	0.379608	0.608039	0.914076	0.000183326	0.635086	0.554656	0.674538	0.861113	0.391193
9	TITLE 5	0.999217	0.723316	0.944442	0.539219	0.893502	0.850636	0.960018	0.196534	0.097103	0.781659	0.77331	0.110255	0.740431	0.551667	0.766292	0.789957	0.595004	0.991573	0.712343	0.317525	0.960162	0.936562	0.206431	0.962586	0.699899	0.97573	0.104364	0.993485	0.967426	0.824328	0.931665	0.96487	0.471458	0.108453	0.9925	0.855978	0.547936	0.246502	0.37464	0.688497	0.0672502	0.86902	0.575147	0.249522	0.398424	0.262717	0.869668	0.336989
10	TITLE 5	0.997234	0.724396	0.94504	0.529812	0.895946	0.845138	0.961801	0.205273	0.0944604	0.78523	0.756468	0.0991505	0.730912	0.537228	0.75469	0.796028	0.606453	0.992744	0.717473	0.325119	0.956324	0.933287	0.213454	0.962503	0.734482	0.965872	0.104129	0.993131	0.973315	0.82572	0.916708	0.967445	0.473522	0.108092	0.993642	0.866499	0.549386	0.423828	0.379074	0.613988	0.0673747	0.86046	0.577935	0.269187	0.401262	0.260547	0.878975	0.330205
11	TITLE 6	0.997993	0.946933	0.746767	0.0868083	0.228583	0.164485	0.216096	0.916511	0.192441	0.872758	0.509076	0.15919	0.415988	0.476246	0.365033	0.429832	0.432194	0.193811	0.218436	0.157547	0.313186	0.151999	0.0783439	0.410087	0.751903	0.57235	0.188265	0.998647	0.294948	0.900438	0.437484	0.446027	0.856262	0.168075	0.993707	0.529185	0.652704	0.69315	0.829189	0.0740349	0.878821	0.396204	0.64503	0.361274	0.926737	0.661957	0.460749	0.938298
12	TITLE 6	0.996594	0.945926	0.746226	0.0846844	0.227095	0.160658	0.217377	0.926665	0.194033	0.868163	0.507011	0.166084	0.421801	0.476691	0.364796	0.432818	0.427177	0.195737	0.217329	0.156566	0.316641	0.150602	0.0786947	0.406876	0.751807	0.568405	0.172627	0.998301	0.275412	0.899942	0.470127	0.44743	0.856408	0.184788	0.993669	0.538505	0.652354	0.758207	0.835647	0.0692835	0.875568	0.396783	0.645879	0.168234	0.928391	0.640874	0.468732	0.954011
13	TITLE 7	0.997983	0.803688	0.855156	0.252018	0.779404	0.452758	0.704409	0.481462	0.70251	0.948106	0.729071	0.164903	0.638403	0.798758	0.326899	0.481566	0.802304	0.458155	0.346819	0.217618	0.910218	0.630477	0.14352	0.911938	0.84236	0.601995	0.792301	0.974891	0.406575	0.686236	0.494234	0.320247	0.43118	0.623338	0.975458	0.576444	0.69414	0.830403	0.166713	0.00784911	0.181147	0.375784	0.699164	0.307593	0.401294	0.501984	0.687099	0.618199
14	TITLE 7	0.998345	0.808816	0.855964	0.249794	0.78128	0.470441	0.700954	0.468999	0.607041	0.953559	0.735808	0.186492	0.662181	0.800686	0.328042	0.485289	0.803371	0.463035	0.345869	0.229057	0.916669	0.634692	0.143155	0.911866	0.871122	0.601853	0.77267	0.976525	0.391357	0.687979	0.50778	0.316855	0.433943	0.613273	0.975668	0.588091	0.69134	0.664956	0.165098	0.012092	0.180933	0.378834	0.698123	0.398595	0.470473	0.456382	0.694681	0.486211
15	TITLE 9	0.999357	0.716035	0.898511	0.602331	0.905634	0.81531	0.929236	0.222972	0.0808088	0.818996	0.939028	0.233624	0.964392	0.783887	0.73762	0.254302	0.893407	0.642592	0.755701	0.353044	0.944784	0.612557	0.126884	0.972578	0.842538	0.918679	0.710511	0.995527	0.829501	0.953854	0.886998	0.856345	0.565347	0.246311	0.980143	0.322441	0.627231	0.582171	0.861028	0.0527037	0.33861	0.928802	0.635464	0.298442	0.576658	0.377934	0.40292	0.572376
16	TITLE 9	0.996666	0.700744	0.896406	0.61266	0.904714	0.809426	0.933113	0.226323	0.0825793	0.808903	0.947074	0.227922	0.956638	0.774623	0.735663	0.257112	0.892689	0.647983	0.755531	0.358312	0.937213	0.610054	0.126476	0.972432	0.826881	0.91855	0.780494	0.992785	0.830907	0.951754	0.883287	0.861518	0.56912	0.240487	0.979873	0.329768	0.629074	0.590139	0.850611	0.00292594	0.340993	0.928095	0.637451	0.393535	0.576138	0.434866	0.386946	0.509823
17	TITLE 11	0.999404	0.486489	0.731257	0.357199	0.723384	0.666605	0.837686	0.0515243	0.0241997	0.487524	0.396489	0.0481818	0.447123	0.458672	0.791999	0.335526	0.529016	0.638635	0.487636	0.321184	0.95819	0.845731	0.117366	0.964834	0.655739	0.775703	0.527187	0.987368	0.679476	0.947244	0.762894	0.749753	0.463598	0.214947	0.992073	0.410698	0.632627	0.405218	0.662376	0.0847911	0.244946	0.926936	0.704244	0.278643	0.377636	0.268735	0.46563	0.348585
18	TITLE 11	0.996913	0.485122	0.729933	0.339239	0.724658	0.665567	0.839021	0.0510133	0.0240675	0.476705	0.406694	0.0461779	0.43695	0.451418	0.789892	0.337062	0.530642	0.639389	0.48852	0.330703	0.955527	0.844185	0.115738	0.967213	0.641698	0.775676	0.498937	0.986282	0.661609	0.947661	0.786776	0.756683	0.464156	0.220626	0.992557	0.418315	0.63372	0.447494	0.722624	0.0664355	0.245228	0.92619	0.705523	0.221374	0.3682	0.253833	0.502319	0.370694
19	TITLE 12	0.998021	0.890135	0.746334	0.135512	0.408989	0.21066	0.410101	0.864981	0.105754	0.269096	0.134173	0.0441324	0.124292	0.526963	0.230927	0.343448	0.464365	0.311693	0.0749364	0.214645	0.570927	0.4369	0.0911032	0.603265	0.716093	0.674766	0.301149	0.835344	0.266077	0.677845	0.486946	0.378838	0.602149	0.399788	0.806569	0.418767	0.71079	0.460898	0.135321	0.0062944	0.473167	0.353933	0.706714	0.286908	0.716477	0.575752	0.533751	0.823231
20	TITLE 12	0.998047	0.895507	0.744896	0.136827	0.411478	0.214868	0.405095	0.853176	0.10103	0.273073	0.141871	0.0445185	0.119288	0.516	0.232418	0.345778	0.462205	0.313785	0.0712694	0.21241	0.581223	0.429435	0.0951372	0.597324	0.690009	0.671558	0.299708	0.838411	0.246132	0.663936	0.514798	0.384801	0.603332	0.408741	0.811118	0.427292	0.707443	0.580718	0.121348	0.0023316	0.477275	0.335625	0.703359	0.356395	0.690558	0.568236	0.54511	0.783413
21	TITLE 13	0.998734	0.836766	0.667776	0.361768	0.86627	0.626009	0.910133	0.109985	0.0475578	0.672378	0.51986	0.255557	0.484054	0.381411	0.367865	0.975115	0.887886	0.834976	0.397204	0.443656	0.736089	0.967795	0.997248	0.754903	0.69679	0.46455	0.117896	0.999344	0.825301	0.991867	0.847648	0.852392	0.905682	0.0563421	0.995692	0.995127	0.0329067	0.818317	0.459042	0.0336981	0.876627	0.38819	0.0160751	0.734701	0.558756	0.495405	0.866879	0.383472
22	TITLE 13	0.999269	0.838045	0.668456	0.357482	0.862491	0.624557	0.906341	0.109332	0.0452531	0.666282	0.516145	0.248229	0.476505	0.366833	0.370579	0.973599	0.894485	0.838608	0.399863	0.458551	0.744221	0.966928	0.996357	0.754467	0.694675	0.464992	0.144924	0.998241	0.831488	0.989655	0.85568	0.85936	0.904942	0.0609977	0.994573	0.993353	0.0335603	0.779957	0.46843	0.0360844	0.87291	0.389165	0.0057267	0.688398	0.546764	0.515248	0.864699	0.449033
23	TITLE 14	0.988917	0.497759	0.920269	0.127186	0.608226	0.320797	0.753493	0.135932	0.0310824	0.127853	0.464822	0.00608195	0.392004	0.186251	0.75577	0.834155	0.541584	0.990909	0.77062	0.1565	0.904258	0.819853	0.373545	0.868332	0.20208	0.929976	0.0534006	0.987567	0.834987	0.962395	0.818382	0.640828	0.723404	0.0377679	0.975879	0.808708	0.0597326	0.188546	0.614256	0.560009	0.783405	0.905685	0.0084604	0.437135	0.437268	0.203602	0.857013	0.373722
24	TITLE 14	0.985458	0.495007	0.921061	0.122258	0.603071	0.32486	0.750117	0.139751	0.0328586	0.134651	0.474801	0.00679912	0.398294	0.191183	0.759415	0.83727	0.538026	0.990423	0.773349	0.160658	0.904492	0.825731	0.389881	0.872132	0.190132	0.928581	0.0525056	0.988723	0.846998	0.955761	0.827765	0.640192	0.721688	0.0374389	0.973995	0.820487	0.0660236	0.236755	0.664076	0.549547	0.788776	0.909364	0.0106084	0.521719	0.436961	0.195281	0.863045	0.369007
25	TITLE 15	0.996281	0.969593	0.797759	0.83855	0.972563	0.90432	0.973916	0.75923	0.780573	0.404884	0.819694	0.148151	0.687473	0.601657	0.459577	0.964143	0.267935	0.907494	0.467013	0.311126	0.83763	0.399501	0.281928	0.890896	0.898253	0.722251	0.193657	0.97364	0.851114	0.986853	0.861446	0.979058	0.921027	0.148248	0.963688	0.971572	0.0677717	0.932395	0.624806	0.0476888	0.887588	0.565752	0.0201354	0.581358	0.72471	0.856933	0.979372	0.644067
26	TITLE 15	0.995416	0.974185	0.800491	0.828044	0.974124	0.904246	0.976022	0.74786	0.761967	0.409405	0.811305	0.124414	0.672075	0.57155	0.461884	0.963816	0.267816	0.910047	0.471952	0.319119	0.845874	0.410552	0.283415	0.896402	0.914586	0.725914	0.189554	0.973129	0.875867	0.983268	0.851458	0.983478	0.920992	0.148106	0.963935	0.97587	0.0632528	0.935973	0.618752	0.0506848	0.883325	0.571972	0.0171824	0.593202	0.764368	0.866807	0.97789	0.726483
27	TITLE 16	0.999752	0.987842	0.30326	0.294011	0.598341	0.494983	0.626199	0.879589	0.243734	0.908252	0.980115	0.207911	0.959976	0.760422	0.148983	0.507855	0.323381	0.565826	0.152133	0.46416	0.610752	0.443775	0.637328	0.667552	0.436112	0.178052	0.164572	0.933534	0.393143	0.785183	0.359011	0.743992	0.529165	0.600488	0.830659	0.574798	0.17806	0.200267	0.518449	0.0155069	0.44134	0.149538	0.0290954	0.624626	0.930471	0.361167	0.747047	0.701725
28	TITLE 16	0.998242	0.986333	0.301558	0.287446	0.594746	0.491923	0.623857	0.874772	0.31834	0.92864	0.97447	0.23611	0.971016	0.780339	0.148503	0.501802	0.310138	0.560475	0.151648	0.452337	0.599378	0.439633	0.630466	0.664253	0.435516	0.177844	0.16023	0.931203	0.388079	0.756791	0.350529	0.736526	0.531982	0.595724	0.825678	0.560389	0.175493	0.164859	0.53474	0.0156781	0.448323	0.148189	0.0274596	0.593577	0.92599	0.352905	0.743809	0.78856
29	TITLE 17	0.997995	0.74494	0.43328	0.0397469	0.212364	0.081187	0.258415	0.187046	0.0408566	0.500128	0.205154	0.0344006	0.158944	0.304728	0.218616	0.820186	0.149601	0.70279	0.0937733	0.181127	0.743094	0.482763	0.210273	0.774788	0.321628	0.279515	0.0666046	0.990594	0.405394	0.949919	0.398168	0.385924	0.580155	0.0406756	0.990049	0.887794	0.697865	0.30103	0.24912	0.0322074	0.399436	0.208534	0.634579	0.310214	0.745958	0.41774	0.713399	0.69291
30	TITLE 17	0.996469	0.739222	0.431156	0.0424763	0.210302	0.0831609	0.26046	0.188697	0.040433	0.511668	0.208924	0.0316596	0.149927	0.30921	0.217563	0.822761	0.149447	0.705689	0.0919772	0.179783	0.750068	0.474854	0.213437	0.777758	0.331014	0.277364	0.0660535	0.99193	0.413855	0.950505	0.421764	0.390524	0.584169	0.0448446	0.989912	0.895532	0.697123	0.359256	0.23395	0.0505869	0.401469	0.207237	0.632514	0.442302	0.732607	0.430123	0.722915	0.678217
31	TITLE 18	0.988606	0.357705	0.650702	0.0238372	0.202174	0.0727928	0.266173	0.0334492	0.0087832	0.260374	0.117343	0.00842944	0.0912057	0.0919877	0.674671	0.58042	0.218815	0.485202	0.262244	0.184685	0.477026	0.102307	0.285894	0.481877	0.112678	0.388264	0.0403258	0.991334	0.264132	0.901189	0.23311	0.132633	0.472039	0.0233855	0.991911	0.561146	0.772343	0.0469989	0.0876926	0.0352525	0.400748	0.482969	0.690107	0.0862762	0.330551	0.126906	0.646942	0.251346
32	TITLE 18	0.984397	0.34983	0.646794	0.025559	0.202608	0.0708668	0.265745	0.0334404	0.00737818	0.25956	0.12755	0.006973	0.0902125	0.0915555	0.670019	0.583274	0.217974	0.487192	0.258595	0.188015	0.48744	0.0996933	0.28597	0.49243	0.112401	0.388463	0.0439604	0.993731	0.406241	0.91072	0.204948	0.132336	0.472697	0.0250043	0.995887	0.571779	0.767431	0.0725028	0.0991465	0.0302192	0.404172	0.483649	0.694161	0.11257	0.368793	0.11675	0.650289	0.298815
33	TITLE 19	0.990157	0.976551	0.698862	0.110248	0.589879	0.323626	0.590616	0.509096	0.088404	0.749349	0.413257	0.0262899	0.320975	0.298239	0.330923	0.332437	0.358018	0.398448	0.187177	0.242403	0.937059	0.801011	0.155702	0.886663	0.458196	0.414502	0.553176	0.994937	0.385163	0.933718	0.415446	0.282247	0.441721	0.616275	0.99605	0.39808	0.834747	0.230459	0.0946835	0.0125717	0.231622	0.327773	0.79994	0.419302	0.585513	0.688505	0.774134	0.533556
34	TITLE 19	0.989028	0.972146	0.699459	0.109434	0.594442	0.322137	0.589176	0.510979	0.098167	0.760156	0.415627	0.0278213	0.325512	0.295599	0.332642	0.334529	0.357678	0.400314	0.188707	0.245624	0.94703	0.802043	0.15436	0.886419	0.483914	0.409024	0.560682	0.993246	0.380593	0.93612	0.412909	0.283361	0.445849	0.606222	0.99591	0.405303	0.832022	0.361653	0.114481	0.0101184	0.233588	0.32873	0.796849	0.361433	0.535728	0.728929	0.779942	0.63267
35	TITLE 20	0.999522	0.57219	0.846934	0.543526	0.853922	0.627551	0.873193	0.155713	0.130326	0.956811	0.970721	0.718749	0.938196	0.936061	0.454505	0.0691563	0.785357	0.274578	0.68281	0.25251	0.983604	0.960569	0.125246	0.959589	0.963607	0.751526	0.589195	0.994859	0.494459	0.95669	0.630249	0.420009	0.419136	0.379062	0.996992	0.107847	0.618605	0.275122	0.129295	0.00683449	0.168487	0.51652	0.657357	0.368097	0.338791	0.34241	0.63736	0.207613
36	TITLE 20	0.998912	0.56391	0.847516	0.566385	0.858222	0.622451	0.875378	0.160667	0.12726	0.957623	0.965506	0.691787	0.946285	0.930607	0.455672	0.0699564	0.785221	0.272729	0.679742	0.256476	0.986845	0.960162	0.124583	0.960771	0.959089	0.747812	0.588585	0.994364	0.501487	0.953342	0.602615	0.422866	0.42144	0.381275	0.997472	0.109394	0.619667	0.619806	0.129634	0.00995655	0.170112	0.522117	0.658872	0.234025	0.241939	0.364829	0.630125	0.222847
37	TITLE 21	0.991574	0.824287	0.860805	0.226451	0.776214	0.620004	0.750452	0.214332	0.0835661	0.876302	0.692579	0.354509	0.549269	0.913658	0.715333	0.0983532	0.734473	0.442251	0.741465	0.196543	0.99417	0.893156	0.0586209	0.994244	0.679548	0.786717	0.730157	0.956447	0.41337	0.853197	0.424098	0.498846	0.375194	0.528976	0.953395	0.134671	0.856149	0.69389	0.227894	0.0429721	0.237442	0.806238	0.819497	0.420908	0.495659	0.849462	0.612569	0.621094
38	TITLE 21	0.989838	0.813939	0.859287	0.231163	0.779954	0.628974	0.75576	0.197011	0.0699152	0.854311	0.71468	0.455433	0.562815	0.931406	0.721121	0.0990339	0.738646	0.444785	0.749527	0.20877	0.993402	0.887066	0.0636664	0.994287	0.697455	0.801388	0.71009	0.959056	0.445743	0.858821	0.417101	0.508306	0.377146	0.533887	0.955476	0.13737	0.853766	0.885206	0.19558	0.0292542	0.239931	0.809387	0.819279	0.302468	0.466737	0.854661	0.613001	0.540125
39	TITLE 22	0.997426	0.910578	0.716207	0.175176	0.301371	0.213099	0.267118	0.976497	0.245251	0.758903	0.417269	0.0667452	0.332449	0.452245	0.330053	0.29578	0.564758	0.372687	0.266709	0.17952	0.642725	0.732696	0.104755	0.673497	0.466006	0.561607	0.102584	0.996503	0.245223	0.879408	0.338312	0.585189	0.811807	0.191473	0.994471	0.379246	0.689329	0.909787	0.180991	0.0263965	0.718146	0.299885	0.695135	0.493765	0.608267	0.679097	0.789504	0.596524
40	TITLE 22	0.998453	0.901857	0.719234	0.180963	0.300661	0.218946	0.269967	0.981877	0.271627	0.757001	0.430312	0.0655211	0.329887	0.457633	0.331103	0.298123	0.567147	0.374625	0.261082	0.188468	0.651126	0.735612	0.111077	0.682053	0.438201	0.562835	0.112799	0.996895	0.263728	0.877998	0.377702	0.587421	0.81215	0.199741	0.993219	0.386246	0.687176	0.824902	0.202918	0.0223913	0.721411	0.293946	0.691636	0.39445	0.581095	0.633499	0.796553	0.561838
41	TITLE 23	0.994189	0.625412	0.834333	0.309488	0.555506	0.445775	0.513763	0.245852	0.297614	0.993886	0.881451	0.477883	0.942715	0.876509	0.308551	0.0450242	0.753435	0.17483	0.453605	0.209784	0.908779	0.98789	0.0430556	0.874455	0.9478	0.714059	0.658654	0.927156	0.263017	0.956179	0.415884	0.274523	0.27138	0.767489	0.920686	0.0738233	0.727056	0.49029	0.0629053	0.00979211	0.0626687	0.415597	0.768023	0.145185	0.168362	0.215498	0.427366	0.273586
42	TITLE 23	0.994921	0.629678	0.83098	0.305381	0.56345	0.434121	0.51698	0.257341	0.350446	0.991006	0.893363	0.539746	0.939067	0.879286	0.309947	0.0452878	0.755739	0.173639	0.457619	0.222182	0.91459	0.987286	0.0424839	0.87672	0.943704	0.70927	0.647818	0.927361	0.250398	0.949277	0.469522	0.274597	0.271495	0.764226	0.922743	0.0767956	0.726724	0.47601	0.0526973	0.00976573	0.0639903	0.415267	0.76697	0.0897964	0.22104	0.241048	0.40478	0.277108
43	TITLE 24	0.993934	0.860908	0.875236	0.231389	0.719418	0.516525	0.667001	0.275989	0.118327	0.890651	0.882591	0.227984	0.83015	0.760548	0.737774	0.0993201	0.850414	0.319802	0.783921	0.208737	0.973904	0.827768	0.0300395	0.992042	0.838166	0.812365	0.866847	0.985844	0.48401	0.961004	0.460455	0.640506	0.378064	0.765398	0.990408	0.133798	0.843558	0.684882	0.329362	0.0497226	0.212346	0.843241	0.799578	0.313499	0.767763	0.740271	0.400946	0.80351
44	TITLE 24	0.992818	0.861851	0.876704	0.251592	0.74313	0.530839	0.689793	0.295272	0.100978	0.874306	0.895744	0.217012	0.837184	0.724969	0.73583	0.104048	0.852767	0.331054	0.781811	0.226705	0.961675	0.818906	0.0379822	0.988861	0.771219	0.813643	0.855004	0.990056	0.488116	0.966666	0.520152	0.66149	0.389778	0.734299	0.992711	0.1392	0.830654	0.621241	0.336424	0.0459196	0.219297	0.834034	0.796868	0.190616	0.864867	0.780548	0.44184	0.9358
45	TITLE 25	0.993507	0.602605	0.804917	0.593608	0.721948	0.541517	0.690196	0.358755	0.400256	0.839657	0.635633	0.204114	0.576112	0.470458	0.401821	0.290064	0.820124	0.582977	0.578964	0.306991	0.958461	0.234684	0.0855516	0.96114	0.953783	0.760422	0.134848	0.951015	0.496787	0.938627	0.870757	0.645727	0.718017	0.401198	0.946115	0.392316	0.574709	0.686219	0.119219	0.0158587	0.527881	0.330674	0.645982	0.391337	0.410202	0.229401	0.872816	0.369176
46	TITLE 25	0.994363	0.606077	0.805051	0.597334	0.724981	0.536383	0.688657	0.337878	0.388083	0.854965	0.639528	0.196138	0.59355	0.454226	0.404188	0.293481	0.816512	0.583374	0.5895	0.311493	0.964449	0.236326	0.076959	0.962888	0.958255	0.757952	0.0851618	0.953914	0.519474	0.947436	0.868357	0.644168	0.720919	0.332549	0.949541	0.400676	0.573435	0.66743	0.137049	0.0202183	0.532729	0.328004	0.645369	0.44719	0.391936	0.167411	0.862741	0.365478
47	TITLE 26	0.998263	0.628376	0.825793	0.461826	0.830749	0.665432	0.825857	0.108494	0.0468132	0.846183	0.806652	0.246739	0.776309	0.799502	0.693158	0.251376	0.887209	0.420708	0.791201	0.315484	0.996245	0.961119	0.121122	0.99123	0.942027	0.790179	0.483103	0.936308	0.458669	0.935236	0.604668	0.616315	0.477914	0.408522	0.93062	0.317168	0.614748	0.628951	0.21462	0.0421574	0.195025	0.694094	0.621042	0.358044	0.558013	0.330764	0.564264	0.371159
48	TITLE 26	0.997725	0.632199	0.82479	0.445413	0.83412	0.671562	0.830103	0.103079	0.0521807	0.850744	0.803734	0.247094	0.774821	0.798065	0.693689	0.25349	0.884587	0.422106	0.786405	0.322588	0.995127	0.961224	0.127505	0.990962	0.946262	0.791446	0.481445	0.940095	0.47463	0.943625	0.697323	0.62494	0.482784	0.391979	0.933343	0.324228	0.612819	0.630398	0.193328	0.0414077	0.196675	0.688736	0.620612	0.386699	0.514461	0.28421	0.584049	0.399765
49	TITLE 27	0.998067	0.669977	0.843442	0.468413	0.872382	0.659283	0.872837	0.135481	0.0428776	0.593587	0.705996	0.0701003	0.738929	0.718503	0.801851	0.186304	0.925677	0.455549	0.74841	0.199993	0.973466	0.95328	0.0776007	0.979878	0.922074	0.876234	0.162175	0.976022	0.521157	0.953135	0.594741	0.810664	0.44949	0.760371	0.97671	0.240328	0.727658	0.78609	0.580323	0.16017	0.276967	0.88171	0.747135	0.464029	0.662321	0.502197	0.625568	0.571287
50	TITLE 27	0.998518	0.663889	0.843351	0.447095	0.873644	0.660586	0.876861	0.143769	0.0415691	0.593861	0.70006	0.0824748	0.756574	0.707282	0.803241	0.187484	0.923179	0.456337	0.747298	0.209087	0.972122	0.952469	0.0888336	0.980826	0.926091	0.872094	0.197659	0.976147	0.524717	0.960964	0.582689	0.817096	0.450219	0.774028	0.976947	0.245388	0.727411	0.600219	0.574495	0.0924036	0.280325	0.879275	0.751235	0.225254	0.624759	0.257429	0.615015	0.55153
51	TITLE 28	0.999245	0.506235	0.845125	0.31415	0.53646	0.404593	0.62394	0.143588	0.0602944	0.610309	0.544017	0.0359169	0.540858	0.421837	0.517444	0.994669	0.49241	0.762489	0.521462	0.548691	0.98125	0.890528	0.768657	0.926846	0.375211	0.866732	0.33095	0.997132	0.855682	0.941765	0.755657	0.533613	0.61546	0.00593429	0.9835	0.98204	0.430584	0.243579	0.663769	0.234861	0.670087	0.515069	0.487503	0.286443	0.187997	0.174026	0.847817	0.152421
52	TITLE 28	0.999055	0.516409	0.848347	0.330121	0.544076	0.407194	0.61951	0.148638	0.0628448	0.595618	0.553658	0.0407472	0.521124	0.412063	0.518054	0.994537	0.487595	0.76579	0.527593	0.561246	0.98345	0.887303	0.772898	0.930212	0.396301	0.860958	0.430576	0.998667	0.860802	0.946681	0.783928	0.535067	0.615109	-0.00187385	0.985205	0.977689	0.428554	0.21722	0.643272	0.280961	0.666217	0.514235	0.485886	0.256981	0.184082	0.178755	0.853294	0.149988
53	TITLE 29	0.998995	0.908897	0.841992	0.488915	0.915237	0.778811	0.903061	0.261939	0.0563058	0.62323	0.612858	0.0629632	0.59844	0.452205	0.754046	0.743426	0.634074	0.889483	0.678861	0.327044	0.987234	0.788682	0.289051	0.98838	0.881448	0.865953	0.364504	0.990033	0.942754	0.948216	0.958801	0.985706	0.573675	0.469823	0.992451	0.74726	0.656951	0.812854	0.882311	0.150676	0.319858	0.828763	0.610396	0.449628	0.856531	0.830428	0.912141	0.873188
54	TITLE 29	0.999031	0.906558	0.844751	0.481675	0.917396	0.780244	0.90117	0.258795	0.0588508	0.627491	0.602872	0.0626433	0.575967	0.442569	0.757668	0.744891	0.636349	0.890823	0.680049	0.331639	0.981269	0.791733	0.293094	0.986012	0.87644	0.865416	0.368158	0.991731	0.934881	0.952898	0.966498	0.983315	0.574261	0.48882	0.991947	0.759783	0.657106	0.77009	0.868886	0.1265	0.322297	0.831743	0.614147	0.48831	0.906871	0.867029	0.91958	0.896171
55	TITLE 30	0.998909	0.702577	0.869042	0.495637	0.84663	0.703672	0.832959	0.162796	0.0653991	0.693608	0.495575	0.16456	0.449632	0.954432	0.661654	0.412807	0.897201	0.510773	0.784498	0.263755	0.998566	0.895705	0.256168	0.985293	0.910562	0.870502	0.874369	0.987871	0.640732	0.833352	0.800057	0.684918	0.39216	0.818326	0.989292	0.485062	0.677001	0.665808	0.267288	0.00609047	0.13766	0.802726	0.685013	0.390805	0.56849	0.406254	0.846304	0.46627
56	TITLE 30	0.997774	0.716578	0.871073	0.50588	0.847556	0.703266	0.833253	0.16301	0.0765083	0.687252	0.484221	0.125134	0.445681	0.956761	0.660978	0.417215	0.895547	0.512545	0.778185	0.272241	0.999177	0.899007	0.257635	0.985129	0.940458	0.870048	0.882313	0.988103	0.628805	0.839456	0.804711	0.692854	0.393515	0.803894	0.990835	0.496215	0.675437	0.636689	0.267709	0.0383223	0.138206	0.804613	0.683487	0.461174	0.551383	0.35888	0.845206	0.437905
57	TITLE 31	0.999835	0.992511	0.796499	0.631295	0.963528	0.7951	0.942367	0.932793	0.710812	0.656728	0.965829	0.274914	0.969897	0.95941	0.545328	0.682687	0.331193	0.933194	0.509375	0.295223	0.969194	0.489806	0.323172	0.945428	0.830016	0.668926	0.786861	0.993653	0.721069	0.851544	0.795559	0.514457	0.342523	0.550797	0.99577	0.670485	0.103017	0.237694	0.879446	0.0966918	0.153166	0.611535	0.0167884	0.687608	0.413945	0.848806	0.673766	0.31055
58	TITLE 31	0.9974	0.992977	0.793713	0.629188	0.970427	0.805597	0.93983	0.936197	0.701387	0.668762	0.972279	0.341768	0.979365	0.960494	0.54288	0.688804	0.319383	0.937409	0.504393	0.310665	0.972552	0.486947	0.315613	0.94794	0.812578	0.667315	0.810636	0.994421	0.715838	0.851989	0.79248	0.534278	0.346326	0.57866	0.995869	0.684807	0.12175	0.144621	0.861467	0.0993296	0.154246	0.607623	0.0175726	0.827294	0.419989	0.79317	0.679909	0.262257
59	TITLE 32	0.99958	0.885417	0.380537	0.464645	0.874497	0.868317	0.976817	0.29904	0.0877238	0.64108	0.269864	0.0219941	0.187368	0.0548121	0.18439	0.812849	0.0675193	0.98321	0.164499	0.823178	0.917936	0.655703	0.983662	0.941279	0.607001	0.26055	0.873073	0.98687	0.950395	0.82735	0.791556	0.728594	0.837539	0.670246	0.983775	0.906354	0.0985989	0.630445	0.239956	0.0151982	0.828178	0.203541	0.0246485	0.61113	0.692474	0.652905	0.923054	0.766944
60	TITLE 32	0.997936	0.883357	0.379057	0.441485	0.870286	0.86343	0.974627	0.287768	0.0845859	0.626489	0.266176	0.0213544	0.1817	0.0533132	0.183928	0.807667	0.0661457	0.981811	0.164192	0.835261	0.923146	0.653011	0.985061	0.944328	0.604329	0.261023	0.871647	0.987289	0.953336	0.824645	0.768592	0.725055	0.8357	0.687053	0.982239	0.895911	0.109332	0.603051	0.230567	0.0153637	0.82252	0.202721	0.0334854	0.581098	0.735598	0.642792	0.933553	0.708297
61	TITLE 33	0.996958	0.9248	0.460776	0.63651	0.912673	0.889689	0.94271	0.634977	0.592338	0.977011	0.972295	0.447822	0.973527	0.965045	0.248858	0.294219	0.253729	0.868773	0.233598	0.317359	0.905636	0.644815	0.182848	0.923813	0.888015	0.302169	0.874271	0.940611	0.810257	0.986209	0.81783	0.652626	0.464348	0.921763	0.850594	0.293053	0.104392	0.821251	0.60291	0.0264785	0.292471	0.265286	0.0175891	0.502095	0.544065	0.624373	0.831361	0.60473
62	TITLE 33	0.996135	0.931191	0.46005	0.645186	0.917359	0.893318	0.944468	0.635088	0.636107	0.969694	0.978635	0.439089	0.982847	0.966343	0.248727	0.298057	0.25618	0.872252	0.234344	0.323588	0.915843	0.642338	0.193725	0.925592	0.868149	0.301989	0.914168	0.938891	0.803219	0.983432	0.876111	0.663536	0.467335	0.926653	0.847943	0.301836	0.0919738	0.854682	0.604575	0.0265715	0.295847	0.264639	0.0140141	0.582699	0.505774	0.715113	0.836737	0.52682
63	TITLE 34	0.998478	0.693946	0.817278	0.0941448	0.621392	0.263316	0.668357	0.0946075	0.0531286	0.696137	0.692487	0.0699749	0.636745	0.37438	0.506	0.528332	0.810127	0.939792	0.559542	0.207869	0.803511	0.63173	0.127871	0.797768	0.356198	0.848809	0.220115	0.970044	0.727156	0.836533	0.803542	0.33873	0.839907	0.141987	0.950631	0.524562	0.0679877	0.810033	0.693235	0.0870823	0.804122	0.632255	0.0138909	0.127545	0.606187	0.343338	0.88162	0.511198
64	TITLE 34	0.997549	0.68254	0.819422	0.0919803	0.62287	0.268115	0.66105	0.0953311	0.0509909	0.693791	0.691716	0.079077	0.623813	0.371621	0.506025	0.534956	0.801732	0.942193	0.559423	0.209414	0.815854	0.639106	0.128885	0.803155	0.356353	0.852656	0.219227	0.971715	0.718622	0.8206	0.815699	0.344002	0.83769	0.166771	0.948977	0.536963	0.0795705	0.745086	0.671378	0.0861828	0.798715	0.632402	0.0229925	0.116179	0.642511	0.417444	0.888976	0.564801
65	TITLE 35	0.99886	0.912249	0.913269	0.53989	0.756338	0.508802	0.754095	0.710732	0.60352	0.424124	0.935658	0.238872	0.934744	0.87668	0.845071	0.892936	0.778244	0.886577	0.765098	0.301143	0.750213	0.972731	0.499756	0.850394	0.968629	0.925477	0.392329	0.992436	0.805512	0.893247	0.87307	0.926097	0.863578	0.426134	0.981621	0.888663	0.0861557	0.514061	0.783289	0.407202	0.862324	0.927693	0.0199664	0.666149	0.688963	0.666469	0.846678	0.793072
66	TITLE 35	0.999002	0.908401	0.912626	0.534327	0.760471	0.498228	0.757147	0.690629	0.549609	0.421426	0.936599	0.181871	0.931299	0.888918	0.844565	0.884676	0.772543	0.890598	0.765255	0.316458	0.762244	0.973994	0.504455	0.852303	0.97407	0.9289	0.404631	0.994321	0.810069	0.904504	0.874628	0.930125	0.861586	0.547648	0.984132	0.876086	0.0802426	0.61428	0.798082	0.406282	0.858236	0.929273	0.00816393	0.73101	0.652412	0.652378	0.839598	0.796339
67	TITLE 36	0.981452	0.591193	0.809668	0.152592	0.562479	0.340607	0.702468	0.222848	0.0472621	0.224054	0.578519	0.113309	0.509368	0.415661	0.476906	0.821968	0.714311	0.987202	0.548084	0.219362	0.85181	0.919366	0.494233	0.857594	0.3824	0.822615	0.324742	0.946168	0.853553	0.743103	0.895263	0.677938	0.910529	0.0603311	0.901504	0.861141	0.0366368	0.665864	0.903021	0.10007	0.881994	0.606002	0.00831692	0.55108	0.401465	0.357552	0.795306	0.304237
68	TITLE 36	0.976849	0.587495	0.808646	0.147265	0.571459	0.341219	0.709861	0.232479	0.0490306	0.225928	0.589287	0.122304	0.529026	0.429067	0.473264	0.816863	0.720627	0.989741	0.545075	0.223261	0.859248	0.921084	0.502384	0.86454	0.365225	0.822766	0.32092	0.946707	0.851757	0.742571	0.937713	0.698651	0.908333	0.0668492	0.910017	0.850688	0.0535044	0.641407	0.869754	0.098642	0.875297	0.600812	0.0109068	0.53803	0.464227	0.340191	0.805372	0.332223
69	TITLE 37	0.994497	0.822771	0.825167	0.0978533	0.536293	0.25358	0.577703	0.376701	0.092473	0.611884	0.825337	0.0230759	0.809264	0.36518	0.523274	0.600097	0.860471	0.789824	0.580322	0.176114	0.766663	0.695422	0.103418	0.76816	0.386741	0.793056	0.14286	0.895954	0.542863	0.487759	0.572812	0.455353	0.937143	0.0718108	0.837558	0.5795	0.0421107	0.810929	0.847954	0.113972	0.916187	0.617064	0.0132721	0.295588	0.599628	0.483123	0.81293	0.460105
70	TITLE 37	0.993946	0.818975	0.828238	0.0910441	0.537162	0.251417	0.579194	0.375477	0.0969506	0.610049	0.814422	0.0280506	0.807213	0.368288	0.525411	0.602959	0.860749	0.790789	0.582107	0.17068	0.781351	0.696981	0.110179	0.772293	0.358703	0.797321	0.133093	0.89798	0.553467	0.460546	0.556484	0.457639	0.938683	0.0653061	0.842774	0.591966	0.0500844	0.833317	0.852008	0.118305	0.911038	0.616213	3.23241e-05	0.294608	0.63802	0.469535	0.813278	0.465155
71	TITLE 38	0.99708	0.984946	0.913856	0.239388	0.492308	0.257755	0.531076	0.840883	0.805125	0.89314	0.917747	0.371985	0.922384	0.815315	0.350438	0.932969	0.856469	0.885412	0.351374	0.284232	0.793625	0.410193	0.364676	0.870914	0.939237	0.658918	0.298249	0.976146	0.82071	0.968333	0.862074	0.909128	0.528035	0.0775885	0.957263	0.879158	0.577694	0.301728	0.452937	0.189362	0.545352	0.509134	0.56701	0.647824	0.512069	0.731098	0.959772	0.507539
72	TITLE 38	0.994118	0.982933	0.911858	0.224742	0.492477	0.264784	0.530872	0.843666	0.84221	0.885714	0.909024	0.371272	0.90052	0.806105	0.350065	0.929137	0.850571	0.888582	0.349278	0.294222	0.804072	0.402858	0.36498	0.870416	0.917042	0.655119	0.295494	0.975276	0.833482	0.970852	0.856974	0.911841	0.527214	0.0378694	0.956919	0.870055	0.577055	0.282044	0.439795	0.197195	0.541524	0.507975	0.566919	0.754691	0.484917	0.772243	0.963024	0.465953
73	TITLE 39	0.998714	0.510674	0.795067	0.321983	0.653423	0.511805	0.645454	0.0983653	0.0421141	0.834902	0.62625	0.174134	0.569232	0.743239	0.643709	0.240142	0.725498	0.397723	0.701382	0.249907	0.96093	0.570821	0.0686196	0.93712	0.846688	0.873661	0.382019	0.977203	0.567855	0.976398	0.919235	0.639456	0.485381	0.158673	0.936918	0.320866	0.521179	0.398629	0.250258	0.0356047	0.196057	0.613328	0.553766	0.261534	0.278355	0.209231	0.593856	0.332735
74	TITLE 39	0.996675	0.51063	0.79257	0.343392	0.661941	0.510609	0.646454	0.0988117	0.0432115	0.830462	0.614595	0.162956	0.557975	0.748103	0.644657	0.242568	0.720495	0.397957	0.710681	0.258212	0.968454	0.569437	0.0739357	0.940709	0.836344	0.874091	0.387446	0.976124	0.554612	0.973898	0.928984	0.646314	0.487249	0.164266	0.936617	0.327592	0.521521	0.326198	0.26437	0.0197011	0.196342	0.612907	0.554285	0.218436	0.269524	0.218396	0.618496	0.320323
75	TITLE 40	0.998949	0.231187	0.482253	0.0533062	0.334193	0.231253	0.616845	0.022414	0.00537201	0.114775	0.231413	0.0117224	0.195848	0.164814	0.856992	0.214686	0.161788	0.592417	0.163657	0.340986	0.901503	0.451002	0.0597298	0.894813	0.294546	0.446773	0.190002	0.899495	0.542185	0.454247	0.871565	0.309686	0.60609	0.0555303	0.909366	0.29966	0.399561	0.0889059	0.788406	0.206115	0.307014	0.898505	0.541131	0.0428753	0.0472187	0.0756002	0.325473	0.0576374
76	TITLE 40	0.998302	0.231513	0.484488	0.0513074	0.335843	0.230414	0.614919	0.0219863	0.00545015	0.117932	0.228136	0.0125932	0.201878	0.165876	0.856923	0.216789	0.161249	0.592694	0.164002	0.342474	0.897935	0.450748	0.0576609	0.895046	0.294156	0.444393	0.190005	0.900325	0.53124	0.456959	0.855357	0.312817	0.608048	0.0555538	0.911531	0.309063	0.401376	0.0944013	0.78393	0.165541	0.308556	0.897311	0.539691	0.0390032	0.0493577	0.0839352	0.316146	0.0376405
77	TITLE 41	0.998263	0.600323	0.845302	0.439137	0.824924	0.737112	0.925332	0.0805918	0.0356489	0.407367	0.413985	0.0389955	0.356571	0.411911	0.701002	0.422239	0.526801	0.779677	0.544382	0.285562	0.941431	0.922461	0.0871333	0.95439	0.789154	0.889135	0.128287	0.984303	0.956956	0.710166	0.962176	0.916474	0.575436	0.137919	0.983293	0.51914	0.611535	0.308082	0.611909	0.246945	0.271216	0.759325	0.628831	0.11387	0.34528	0.296237	0.845073	0.305549
78	TITLE 41	0.996839	0.585206	0.842034	0.437695	0.821858	0.726414	0.922911	0.084971	0.0357946	0.385726	0.399738	0.0351815	0.344034	0.393634	0.705888	0.426741	0.521674	0.784231	0.544959	0.308744	0.934894	0.92133	0.0871575	0.951007	0.802064	0.887434	0.126943	0.983426	0.971337	0.727801	0.964645	0.920575	0.579728	0.139727	0.983951	0.529652	0.613904	0.372716	0.681819	0.320455	0.27444	0.770549	0.62921	0.198946	0.326422	0.289227	0.84662	0.329126
79	TITLE 42	0.997897	0.916057	0.78228	0.410613	0.856043	0.543535	0.854632	0.721115	0.784686	0.427586	0.62534	0.0378231	0.575478	0.661504	0.381893	0.933717	0.629786	0.619425	0.353743	0.24498	0.929171	0.89626	0.27217	0.905916	0.845002	0.561542	0.502162	0.979738	0.728924	0.594762	0.862437	0.488591	0.410995	0.598348	0.97769	0.976102	0.687923	0.246392	0.0836625	0.0146703	0.107662	0.37684	0.651556	0.707525	0.532269	0.764008	0.808711	0.69065
80	TITLE 42	0.995789	0.913866	0.78205	0.421071	0.860029	0.55061	0.854227	0.722312	0.810925	0.428498	0.647896	0.0463712	0.5768	0.661224	0.382189	0.936323	0.62316	0.622941	0.357274	0.254688	0.93614	0.896828	0.27762	0.912486	0.821743	0.568453	0.486434	0.979683	0.738049	0.598937	0.904926	0.491418	0.412998	0.603121	0.979615	0.982201	0.690863	0.180404	0.0451747	0.0136477	0.106435	0.379993	0.656797	0.736371	0.579441	0.803798	0.826547	0.659907
81	TITLE 43	0.998931	0.341641	0.587419	0.0872897	0.443387	0.365441	0.684491	0.0380552	0.00979393	0.329327	0.341487	0.0296881	0.369049	0.280367	0.853911	0.172591	0.241807	0.566862	0.284374	0.282024	0.872899	0.477744	0.0850255	0.905955	0.509663	0.644807	0.289646	0.993362	0.737965	0.757147	0.932412	0.619132	0.539005	0.085582	0.993322	0.245911	0.488581	0.131663	0.481301	0.113441	0.234837	0.932184	0.577122	0.121558	0.168671	0.139706	0.40745	0.155778
82	TITLE 43	0.996851	0.336931	0.58754	0.0837949	0.447055	0.366016	0.687173	0.0390071	0.00927621	0.329229	0.356558	0.0281139	0.35813	0.272956	0.854519	0.173274	0.241733	0.568559	0.283223	0.287434	0.865378	0.4774	0.0865565	0.90435	0.529288	0.652554	0.289837	0.991837	0.744053	0.762719	0.950262	0.620981	0.54001	0.0889695	0.992909	0.249195	0.487605	0.167996	0.415694	0.139674	0.233853	0.9332	0.577208	0.0579516	0.169001	0.14092	0.401734	0.155997
83	TITLE 44	0.997743	0.757701	0.717489	0.380404	0.391981	0.278964	0.348191	0.826885	0.541043	0.649058	0.311966	0.345168	0.237996	0.675402	0.302767	0.374803	0.779722	0.351986	0.335916	0.212541	0.536656	0.346194	0.103644	0.620352	0.793217	0.422294	0.284537	0.990656	0.512739	0.716973	0.84849	0.709461	0.937946	0.0634912	0.988404	0.484928	0.508254	0.543612	0.585462	0.0437347	0.978114	0.268452	0.534388	0.519706	0.368103	0.355751	0.772335	0.363226
84	TITLE 44	0.998042	0.74176	0.720707	0.391555	0.400456	0.280415	0.346831	0.808586	0.571173	0.65834	0.309022	0.366624	0.241347	0.677828	0.304657	0.379531	0.786072	0.353712	0.347287	0.221276	0.546623	0.345782	0.102291	0.623234	0.791415	0.423954	0.328476	0.992083	0.559165	0.717397	0.83757	0.717335	0.935978	0.0668291	0.990455	0.495781	0.510548	0.62067	0.574198	0.0453325	0.976838	0.267998	0.534006	0.535921	0.357587	0.351968	0.776276	0.350182
85	TITLE 45	0.998272	0.466209	0.715808	0.236489	0.64073	0.553664	0.783328	0.0720116	0.026147	0.450096	0.538585	0.0274977	0.581503	0.52893	0.82589	0.24744	0.441456	0.53571	0.459586	0.25623	0.975864	0.588394	0.137033	0.97246	0.588899	0.845953	0.202892	0.995786	0.771937	0.97641	0.945602	0.806153	0.64179	0.170758	0.980036	0.326009	0.506901	0.425047	0.501047	0.096241	0.362744	0.868368	0.548609	0.265278	0.147549	0.211425	0.597733	0.170813
86	TITLE 45	0.997216	0.462041	0.716868	0.23292	0.639643	0.551905	0.784298	0.0728846	0.0248339	0.459054	0.54153	0.0311008	0.588382	0.53123	0.826996	0.249215	0.439964	0.53481	0.464308	0.253152	0.975535	0.588513	0.134665	0.975713	0.602547	0.845387	0.200516	0.994752	0.781142	0.973578	0.953463	0.804376	0.644406	0.171878	0.979504	0.331235	0.50694	0.454872	0.622666	0.0720406	0.364425	0.870343	0.547979	0.339324	0.165996	0.228418	0.602118	0.0671543
87	TITLE 46	0.997587	0.72456	0.817686	0.399776	0.377316	0.440154	0.346644	0.443888	0.609245	0.699176	0.713632	0.297291	0.620151	0.80071	0.405505	0.527664	0.815311	0.358891	0.466935	0.185006	0.678991	0.983846	0.192099	0.730978	0.857394	0.788349	0.576164	0.977865	0.463395	0.665141	0.719818	0.768289	0.975041	0.0988192	0.978088	0.647031	0.566611	0.509728	0.585134	0.0492673	0.949605	0.394621	0.602163	0.6097	0.34381	0.393548	0.809068	0.323623
88	TITLE 46	0.996584	0.716066	0.819319	0.433817	0.377783	0.448279	0.349389	0.447115	0.651286	0.705502	0.728709	0.281531	0.634778	0.802405	0.405883	0.53355	0.816114	0.36164	0.464994	0.184438	0.688513	0.983338	0.194895	0.73155	0.857154	0.781668	0.588704	0.977884	0.468415	0.679154	0.74254	0.771654	0.975576	0.0475798	0.979607	0.656872	0.567984	0.621293	0.600592	0.0432824	0.952205	0.395362	0.602182	0.655844	0.342164	0.44268	0.809624	0.320338
89	TITLE 47	0.994899	0.471775	0.738078	0.233071	0.661255	0.542334	0.781849	0.0652274	0.0256407	0.1276	0.57125	0.0521756	0.654624	0.615889	0.796992	0.140024	0.467422	0.466864	0.47673	0.237486	0.984756	0.784545	0.12599	0.987918	0.798086	0.853022	0.466559	0.973549	0.648161	0.661529	0.87588	0.860466	0.479422	0.245247	0.97881	0.187469	0.617006	0.449756	0.374986	0.0674498	0.214604	0.880263	0.666145	0.19324	0.281727	0.250558	0.477073	0.284598
90	TITLE 47	0.995342	0.470838	0.734828	0.219048	0.65866	0.536223	0.781474	0.0616083	0.0274324	0.125782	0.547494	0.0587996	0.648	0.599055	0.800008	0.140749	0.459869	0.473162	0.473396	0.234491	0.982579	0.778705	0.128155	0.984855	0.806578	0.851595	0.464172	0.976655	0.66409	0.668719	0.911829	0.858357	0.482885	0.239643	0.979293	0.191911	0.615636	0.380208	0.489261	0.0648217	0.215919	0.87813	0.662455	0.250112	0.29366	0.269961	0.49621	0.210638
91	TITLE 48	0.994916	0.770911	0.924212	0.369441	0.268193	0.316646	0.257344	0.263853	0.0701632	0.558356	0.628864	0.0823686	0.547703	0.420877	0.560995	0.382965	0.801752	0.356066	0.550567	0.242587	0.559273	0.958898	0.113068	0.659737	0.834541	0.861136	0.435432	0.98994	0.546522	0.611332	0.672452	0.948996	0.902798	0.108107	0.987935	0.47152	0.599398	0.361549	0.761283	0.303453	0.938515	0.614984	0.60287	0.332052	0.387562	0.478431	0.806107	0.340514
92	TITLE 48	0.994485	0.781219	0.923932	0.40298	0.275655	0.297179	0.249412	0.256847	0.0690034	0.550794	0.60557	0.0756434	0.533582	0.414791	0.560137	0.386474	0.807978	0.356801	0.545475	0.254517	0.569744	0.958026	0.109153	0.66167	0.80909	0.858238	0.385877	0.990762	0.550031	0.640058	0.748465	0.95448	0.902622	0.08325	0.989272	0.482365	0.597399	0.384006	0.737876	0.258096	0.934857	0.611046	0.602711	0.330229	0.35791	0.488769	0.807555	0.330623
93	TITLE P1	1	1	1	1	1	1	1	1	1	1	1	1	1	1	1	1	1	1	1	1	1	1	1	1	1	1	1	1	1	1	1	1	1	1	1	1	1	1	1	1	1	1	1	1	1	1	1	1
94	TITLE P1	0.998006	0.997362	0.999618	0.999106	0.99747	0.997579	0.998022	0.989177	0.950121	0.995274	0.995762	0.956872	0.995569	0.997529	0.999064	0.996998	0.997789	0.998144	0.99833	0.99526	0.995865	0.998757	0.996442	0.998355	0.992437	0.998223	0.99558	0.998094	0.99506	0.995251	0.994694	0.996618	0.998617	0.991287	0.998343	0.996767	0.997027	0.967972	0.980497	0.763043	0.999047	0.999035	0.998832	0.874557	0.953039	0.940832	0.997945	0.937208
95	TITLE P2	0.996902	0.994225	0.999431	0.99157	0.997376	0.996047	0.998161	0.972641	0.860429	0.990233	0.986129	0.795443	0.98687	0.982052	0.99973	0.997028	0.994846	0.998528	0.995968	0.994807	0.99595	0.998408	0.996701	0.998733	0.993158	0.998558	0.993773	0.998908	0.995887	0.9963	0.992916	0.994249	0.998887	0.980437	0.998833	0.997388	0.994866	0.939123	0.985862	0.878327	0.999293	0.999436	0.998591	0.830682	0.943342	0.929252	0.997591	0.9249
96	TITLE P2	0.998367	0.995007	0.999158	0.991391	0.99653	0.996119	0.996598	0.961345	0.802349	0.989713	0.987287	0.749675	0.984021	0.975758	0.998557	0.997139	0.994376	0.9977	0.99516	0.994419	0.995352	0.997366	0.996791	0.997748	0.992929	0.997324	0.988899	0.997237	0.99617	0.995519	0.991452	0.992911	0.998421	0.972172	0.997878	0.996882	0.996474	0.973373	0.993428	0.767056	0.998302	0.998447	0.998048	0.88507	0.941996	0.948575	0.996654	0.936047
97	TITLE p3	0.99851	0.991493	0.998575	0.977165	0.995947	0.99191	0.997307	0.913412	0.705772	0.975708	0.976306	0.536052	0.96779	0.951623	0.999072	0.998022	0.979089	0.998366	0.990968	0.994741	0.99676	0.995893	0.997182	0.997582	0.985389	0.998402	0.985013	0.998773	0.992556	0.996858	0.983789	0.987157	0.998282	0.887192	0.998737	0.997349	0.994505	0.969808	0.991465	0.848867	0.999053	0.998832	0.996543	0.837542	0.945147	0.941662	0.995899	0.909779
98	TITLE p3	0.996795	0.990213	0.998271	0.975083	0.995256	0.990997	0.99706	0.914638	0.648919	0.968792	0.957597	0.491704	0.951429	0.939185	0.996998	0.996371	0.979867	0.998094	0.990051	0.990951	0.99239	0.995577	0.995693	0.99786	0.981568	0.996285	0.971282	0.998566	0.993429	0.990509	0.975707	0.983942	0.998489	0.877873	0.998498	0.996615	0.994461	0.966568	0.98799	0.850229	0.999112	0.996412	0.99813	0.870469	0.914705	0.956645	0.994683	0.944685
99	TITLE p4	0.999646	0.992419	0.998837	0.980901	0.997512	0.994665	0.998524	0.935102	0.679816	0.979292	0.964101	0.556115	0.966845	0.948888	0.998353	0.999473	0.971006	0.999201	0.991963	0.997747	0.998418	0.997168	0.998907	0.998607	0.987014	0.998258	0.982628	0.999646	0.994587	0.998993	0.986614	0.986728	0.999358	0.939399	0.999477	0.999336	0.995746	0.972191	0.991975	0.901396	0.999678	0.996634	0.997727	0.886459	0.947478	0.957144	0.99638	0.940608
100	TITLE p4	0.997989	0.992217	0.998526	0.980362	0.995431	0.990387	0.996395	0.927131	0.637813	0.97579	0.969011	0.497271	0.967022	0.943527	0.996364	0.996825	0.972021	0.997629	0.98955	0.992	0.995128	0.995952	0.995992	0.997062	0.989361	0.995273	0.979619	0.997267	0.99442	0.99533	0.97783	0.982561	0.997901	0.925878	0.99763	0.995184	0.991988	0.971341	0.99252	0.828763	0.998264	0.994168	0.996723	0.843759	0.947931	0.959997	0.997205	0.946109
101	TITLE p5	0.994062	0.99142	0.98449	0.282341	0.768139	0.487412	0.730828	0.917825	0.669973	0.895311	0.952036	0.218875	0.935148	0.779104	0.947264	0.479717	0.975679	0.64829	0.920398	0.244709	0.917226	0.976254	0.215094	0.893487	0.747305	0.950475	0.755147	0.979278	0.537596	0.813692	0.616684	0.627718	0.701978	0.421505	0.973062	0.503608	0.985496	0.811052	0.651603	0.194538	0.633161	0.945164	0.987774	0.393072	0.874404	0.888865	0.68724	0.846781
102	TITLE p5	0.993789	0.990931	0.983349	0.270263	0.76046	0.492006	0.726532	0.939041	0.668614	0.903554	0.945755	0.234881	0.931051	0.778198	0.941833	0.483248	0.976553	0.652358	0.914614	0.254519	0.928831	0.975909	0.219963	0.890817	0.712377	0.942964	0.776277	0.977845	0.553039	0.819385	0.598204	0.632103	0.702889	0.441169	0.973646	0.512343	0.985772	0.775653	0.659048	0.171148	0.636366	0.939588	0.990014	0.450211	0.920138	0.89408	0.710119	0.908648
[truncated: 38 more columns]

## Sheet: METABOLITE TABLE
0	intervals_class(1=Known,2=Unk,3=bin,4=left_out)	1	1	1	1	1	1	1	1	1	1	1	1	1	1	1	1	1	1	1	1	1	1	1	1	1	1	1	1	1	1	1	1	1	1	1	1	1	1	1	1	1	1	1	1	1	1	1	1
0	mean_ppm	0.000670079	0.666727	0.871327	0.976301	0.989442	1.01939	1.05163	1.08265	1.13491	1.15416	1.17326	1.17739	1.18365	1.1893	1.27839	1.3389	1.41682	1.49109	1.57757	1.92198	2.1466	2.36434	2.40743	2.65237	2.6947	2.75398	3.04522	3.29123	3.35632	3.36029	3.36824	3.66987	3.89479	3.93314	4.07586	4.12216	4.22255	4.90648	5.191	5.20979	5.23959	5.31293	5.43746	6.52388	6.87211	7.00734	7.06723	7.18275
0	signal_to_noise	83.686	21.7007	52.4153	47.7423	50.8823	25.026	53.8242	23.3778	16.9831	38.6425	44.8026	31.1443	45.7292	31.931	19.7526	47.9491	34.7613	55.8559	30.0194	33.3297	43.8421	47.9524	45.0341	46.2299	15.5659	39.0437	28.2271	49.6576	23.9465	34.4018	33.9918	40.4612	60.5255	20.8003	65.5726	54.1251	33.1681	21.3123	20.378	17.7516	57.1258	45.7181	47.7515	6.85146	14.5139	13.8823	26.203	16.1666
0	occurance	1	1	1	1	1	1	1	1	1	1	1	1	1	1	1	1	1	1	1	1	1	1	1	1	1	1	1	1	1	1	1	1	1	1	1	1	1	1	1	1	1	1	1	1	1	1	1	1
0	std_ppm	6.70725e-05	0.00227825	0.0166065	0.000160878	8.37112e-05	0.00594959	0.00438218	0.00523863	0.0057497	0.0050147	9.28017e-05	0.000803219	9.05395e-05	0.00232074	0.00736059	0.00482637	0.00400918	0.00343971	0.00884563	7.68955e-05	6.76779e-05	0.0021549	7.62889e-05	0.000325917	0.00219357	0.00493781	0.000224755	7.29013e-05	0.000196977	7.52871e-05	8.98359e-05	0.00238677	0.000660031	0.000444225	7.94326e-05	5.0224e-05	0.00594669	0.000763347	0.00106835	0.00275023	0.00234594	0.00788119	0.00386056	0.00228292	0.00531838	0.00383005	0.000238055	0.000305041
0	max_ppm_difference	0.0001528	0.00657042	0.0290321	0.000611202	0.000305601	0.0148216	0.0119184	0.0119184	0.0169609	0.0110016	0.000305601	0.00244481	0.000305601	0.0160441	0.0297961	0.0116128	0.0149744	0.0120712	0.056689	0.0001528	0.0001528	0.0155856	0.0001528	0.00229201	0.00397281	0.0102376	0.00168081	0.0001528	0.000764002	0.0001528	0.0001528	0.00733442	0.00397281	0.00168081	0.0001528	0.0001528	0.0149744	0.00183361	0.00550082	0.014516	0.00626482	0.0247537	0.00977923	0.0105432	0.0146688	0.0236841	0.000764002	0.0010696
0	mean_signal	2.26761e+06	4579.17	38894	9388.83	39851	12549.9	35784.6	5103.28	2969.42	18109.1	11556.7	4491.44	11746.6	10750.1	110964	773888	19680.6	107038	16086.2	27886.2	114878	29503.5	29748.3	31092.8	1873.05	20876.3	9323.91	270327	7948.05	15229.1	5319.66	43374	241039	7744.26	251286	142567	34897.7	1763.73	1793.5	2222.38	168404	28525.5	24720.5	1529.42	2950.98	1815.24	10271	2111.86
0	noise	202185	2.08261e+07	2.55492e+06	21029	274905	1.10942e+07	114140	2.29244e+06	3.32592e+06	782367	31050.6	106351	26242.8	1.15062e+06	1.48471e+10	1.61844e+08	1.01021e+07	624715	4.77831e+07	2.7319e+06	4.4348e+06	664397	233795	547444	3.26146e+06	6.49474e+06	1.05273e+06	1.32659e+07	5.35663e+06	661735	96496.1	3.88946e+06	1.88759e+06	5.20304e+06	355020	1.55669e+06	1.08822e+07	452169	626729	5.20408e+06	1.53626e+06	3.28587e+06	302824	6.3283e+06	8.02269e+06	7.80655e+06	6.10847e+06	1.57388e+06
0	number_of_iter_align	1	1	5	1	1	1	1	1	1	1	1	5	1	1	1	1	1	1	5	1	1	1	1	1	1	1	5	1	5	1	1	1	1	5	1	1	5	1	1	5	1	5	5	5	1	5	1	1
0	mcr_exp_variation	99.9988	99.9878	99.8568	99.9968	99.9891	99.9849	99.9987	99.9914	99.9779	99.994	99.9942	99.9863	99.9952	99.9467	99.9257	99.9972	99.9943	99.9987	99.9922	99.9945	99.9982	99.9961	99.9945	99.9928	99.7865	99.9734	99.9935	99.9986	99.9698	99.9957	99.9953	99.9782	99.9852	99.9768	99.9983	99.9961	99.9973	99.9892	99.9726	99.9715	99.9989	99.9842	99.9994	99.9015	99.9817	99.9577	99.9972	99.9734
0	ss_corr	0.996405	0.741647	0.788986	0.394199	0.686555	0.550477	0.717546	0.402375	0.259007	0.649555	0.65765	0.199163	0.62582	0.600233	0.601279	0.5286	0.633294	0.655815	0.541854	0.351969	0.861178	0.713817	0.315503	0.872068	0.71962	0.727425	0.455917	0.974668	0.649139	0.852392	0.726365	0.66435	0.640709	0.370963	0.96432	0.572365	0.50534	0.55176	0.523116	0.187354	0.515339	0.644482	0.496308	0.432287	0.536959	0.492385	0.74097	0.509676
0	intervals_name	TSP	cholesterol	LP (CH3)	leucine 1	Valine 1	isoleucine 1	valine 2	isobutyric acid	2-oxoisovaleric acid	propylene glycol	2-propanol 1	ethanol 1	2-propanol 2	ethanol 2	LP (CH2)	lactate 1	lysine	alanine	LP (CH2CCO) 1	acetate	methionine	glutamate	succinate	methionine 2	aspartic acid 1	LP (C=CCH2C=C)	creatine 1	myo-Inositol 1	proline 1	methanol	proline 2	isoleucine 2	glucose 1	creatine 2	myo-Inositol 2	lactate 2	sucrose 1	β-mannose	α-mannose	LP (CHOCOR)	glucose 2	LP (CH of unsaturated lipids)	sucrose 2	fumarate	tyrosine 1	1-methylhistidine 1	histidine 1	tyrosine 2
0	Variable #	1	2	3	4	5	6	7	8	9	10	11	12	13	14	15	16	17	18	19	20	21	22	23	24	25	26	27	28	29	30	31	32	33	34	35	36	37	38	39	40	41	42	43	44	45	46	47	48
Samples #	Samples Names	0	0	0	0	0	0	0	0	0	0	0	0	0	0	0	0	0	0	0	0	0	0	0	0	0	0	0	0	0	0	0	0	0	0	0	0	0	0	0	0	0	0	0	0	0	0	0	0
1	TITLE 1	6.60403e+06	45137	539614	24159.2	154516	50158	140101	13758.5	10020.3	28095	37923.7	2471.57	37918.3	7212.32	1.0159e+06	1.94001e+06	132352	512418	204326	44151.7	219982	57134	57529.3	107452	4664.53	206386	4250.09	1.29902e+06	27333.3	72750.2	11760.5	161756	1.0004e+06	9238.99	1.29784e+06	393031	10458.9	4263.13	5543.05	14502.7	643802	313643	2197.59	4522.5	16646.9	10225.7	51583.5	10362.4
2	TITLE 1	6.72675e+06	44328.9	537145	24277.5	153798	49916.7	138921	12589.9	10390	27668	37446.3	3264.7	37155	7953.26	1.00991e+06	1.96024e+06	129978	515750	200473	45881.8	222319	57158.1	58275.9	108792	4946.96	202042	3642.81	1.3041e+06	29114.2	71816.1	12455.8	163172	1.00062e+06	9071.16	1.30201e+06	402632	6696.22	4379.01	4370.8	14541.6	648519	312582	3360.75	4541.74	17340.9	12519.2	52941.8	8744.88
3	TITLE 2	6.44872e+06	27726.9	1.17416e+06	195183	546242	309053	574314	29809.3	8499.72	66327.6	25059.6	1412.76	25541	16735.3	2.5322e+06	1.26951e+07	93989	1.84831e+06	661604	705060	528979	204849	877447	259065	12487.4	477009	17296.1	1.03542e+06	94760.9	26860.7	33907.3	321836	5.46171e+06	6592.19	994590	2.36643e+06	12775	21518.4	24508.2	55478.1	4.33263e+06	896362	3820.08	14473.2	13937.6	6540.32	181096	7982.17
4	TITLE 2	6.57043e+06	26879.5	1.16513e+06	195351	547228	309542	574849	30556.2	6972.35	66394.8	26181.9	3358.36	25735.2	17738.7	2.51126e+06	1.28194e+07	87826.4	1.85713e+06	656227	722678	537848	206705	890217	260621	14709	473169	16515.9	1.03872e+06	100312	27481.3	33604.1	318002	5.457e+06	7089.74	997244	2.42526e+06	11761.4	19086.8	21006.7	48511.8	4.36314e+06	894553	2264.64	15477.6	12330.3	5376.26	182086	6484.37
5	TITLE 3	6.74083e+06	67082.8	729637	27589	217553	65201	193319	12260.4	9230.21	41624.7	20036.3	1994.01	19334.2	11343.1	1.21419e+06	948986	192016	433175	199866	34739.1	294811	77506.7	30073.6	126997	10518.7	264772	8340.49	945371	33481.1	33932.1	14342.5	148716	494644	13106.2	948124	218659	9668.18	5171.6	5811.29	22441.9	223696	409351	2775.15	3482.01	6076.23	12527.5	47488.4	3274.11
6	TITLE 3	6.82379e+06	67154.7	726110	25201.8	216363	64458.1	195953	12377.5	9644.79	42911.1	18526.9	1718.52	18384.8	12481.1	1.20771e+06	954498	190664	435386	200983	35479.4	299223	75973.2	30372.5	127721	11521.3	260006	9021.71	949247	30775.1	35116.6	15026.5	148340	494276	13798.4	948250	220794	8754.4	5457.96	7247.6	22878.4	224637	406900	2132.29	1957.12	5099.03	14168.5	48141.1	3269.98
7	TITLE 4	6.81647e+06	32362.1	589618	101452	365977	153944	376075	33383.4	12844.1	63077.7	72763	9397.97	74864.5	39641.6	1.04878e+06	1.20754e+07	100445	1.46611e+06	256694	268347	457559	96903.9	384595	208450	4045.65	212397	13956	1.04078e+06	79719	27977.5	26202.4	472232	3.80455e+06	13297.1	1.01977e+06	2.3215e+06	13957.8	18850.6	20851.1	9045.03	2.90793e+06	372400	2060.84	13755.3	10530.6	12525.1	136111	8318.99
8	TITLE 4	6.92909e+06	28493.4	572690	101832	364177	153833	376945	32246.7	13561.7	66368.4	72858	8977.02	74636.8	43779.2	1.03773e+06	1.21778e+07	96918.2	1.47269e+06	248499	273918	463845	98782.6	387500	211855	3871.22	204275	13765.8	1.04401e+06	82415.6	26813.6	27066.6	476653	3.80632e+06	12406.9	1.02347e+06	2.36557e+06	11134	20226.1	22887.7	8532.2	2.93141e+06	357063	4011.03	13765	11182.4	12585	137984	6605.56
9	TITLE 5	6.73304e+06	51073.6	442282	26360	231350	63262.5	208215	21721.1	17415.3	58054.8	22120.4	11133.7	23216.8	35011.2	723361	3.00826e+06	209326	724254	85404.9	33720.1	443910	203632	29390.8	188112	12302.9	171890	138865	1.10765e+06	53450.9	30516.7	26139.8	240143	638928	115206	1.14268e+06	614259	241722	2333.08	2880.87	11183	57338.5	232945	223599	3329.32	23767.1	15361	50607.4	12003
10	TITLE 5	6.83767e+06	47816.8	438095	25173.3	228216	61824.7	208446	20226.1	17437.1	57456.6	21742.9	10448.3	22244.4	36524.4	719756	3.04565e+06	207089	731031	85898.3	35413.7	452542	203394	30731.8	189023	11404.7	167498	136638	1.11149e+06	52597.3	30024	26362.4	240444	642116	116612	1.14571e+06	627492	242346	2979.98	2886.38	11824.2	56966.7	232046	221700	4622.3	24447.1	16547.9	51513.5	13005.3
11	TITLE 6	6.80497e+06	54331.3	353223	12093.1	70115.7	15116.9	42236.4	21314.1	11017.3	117902	22939.3	16600.6	22348.1	47072.9	590590	1.65268e+06	170757	112975	44191.9	27586.4	102338	42487.2	13424.8	60990.9	4579.98	128125	5486.32	1.21113e+06	18243.3	43587.6	6960.7	137550	2.60852e+06	3645.04	1.24832e+06	354672	231148	13845.6	16506.2	12544.7	1.85882e+06	116527	206932	2760.47	13724.3	12031.4	22046.2	7081.66
12	TITLE 6	6.90257e+06	54712.6	353393	10814.2	69362.3	14120.9	44149.5	20557.4	9974.07	119611	22807.7	16340.6	22248.9	48268.9	590414	1.66783e+06	171791	113930	44859.8	27272.9	103726	40601.5	14121.9	60704.9	5519.34	129861	5875.01	1.21529e+06	17777.8	45577.6	8022.08	139693	2.60571e+06	4770.83	1.2505e+06	361622	233414	12220.4	16180.1	11884.9	1.87032e+06	115784	207640	2363.8	14808.5	13813.5	21851.8	8243.01
13	TITLE 7	6.51473e+06	52476.2	392123	17224.4	148532	35563.7	119723	17280.2	8603.76	59056.1	21910.7	7579	22085.6	26725.2	488068	1.84276e+06	189321	243861	41032.4	32941.3	284446	95131.5	21790.9	131532	10700.8	127139	32895.6	1.02849e+06	22041.7	33629.3	11490.5	109130	607331	22264.2	1.06765e+06	387897	210279	5005.9	3893.48	3926.6	153919	124977	190629	2910.72	5202.56	7765.67	32669.6	4362.19
14	TITLE 7	6.6154e+06	53843.2	392122	17249.5	150355	37227	118661	17116.6	11693.1	61949.7	21948.9	8781.63	23335.6	29727.9	489994	1.85668e+06	193262	245234	40487.9	33290.6	288488	95582.8	22006.6	132072	10544.5	128171	33835.7	1.03217e+06	21794.9	33618.8	10962.6	107143	610130	24377.6	1.06996e+06	395968	211378	3836.89	4244.36	4067.51	153503	128932	189657	3738.44	5426.81	10157.7	32854.6	2167.61
15	TITLE 9	6.82545e+06	66724.4	554637	25512	204569	57607.6	180437	28384.3	13475.7	80211.9	23111.9	17188.9	23022.8	54498.1	926114	925210	176820	330669	91177.6	40378.6	452769	395931	19153.7	198532	16831.1	172252	13481.8	1.28998e+06	37414	64275.3	14270.2	200113	751383	14914.4	1.33176e+06	220879	218411	6096.55	6199.81	4258.38	269726	268765	202055	3449.09	16919.2	13383.3	18800.2	8613.9
16	TITLE 9	6.93356e+06	69560.5	555950	26064.7	203359	54959.5	182482	27758.2	14150.1	80931.2	23958.3	18605.4	23619.9	55886	928108	935369	175545	334616	91263.9	40955.1	460575	401372	19374.1	198688	17968.6	171865	13948.1	1.29512e+06	34901	64454.7	14753.5	202819	754467	15140.8	1.33622e+06	227915	221115	5544.24	6110.21	5926.34	271594	268862	202059	4174.04	16367.7	15087.7	18107.7	9864.06
17	TITLE 11	6.8325e+06	81796.8	667169	23697.5	180645	48333.7	149082	21128.5	17882.7	79673.6	5918.58	7177.87	6182.97	30527.8	1.05268e+06	1.21681e+06	202110	315490	101503	36145.3	428204	223470	17546.7	188977	14752.1	172352	31227	1.07644e+06	28310.6	44137.1	13315.5	170708	621600	40645.1	1.11434e+06	268523	201303	3808.07	4153.82	4184.07	195847	296030	179436	3967.41	11077.8	12778.2	21716.9	5917.1
18	TITLE 11	6.91436e+06	82290.1	668669	24251.6	180741	48902.8	149608	18728.7	18777.4	82734.3	6716.66	7436.71	7050.87	29512.9	1.05444e+06	1.22294e+06	199536	314377	102281	36856.3	435938	224387	17741.2	189787	14036.7	172666	31287.6	1.07725e+06	27051.4	44956.8	12178.5	172837	622970	41395.4	1.115e+06	273398	201699	5116.44	2692.65	5009.46	195502	292275	179067	3476.8	12511.6	14474.1	22642.5	5833.07
19	TITLE 12	6.52343e+06	45246.5	314645	14335	96113.6	15029.5	72638.3	19582.4	10573.4	27988.3	7706.75	9031.81	8743.81	28242.8	444675	1.31945e+06	179530	174213	21928.5	34615.8	173293	79181.8	15105.7	84541.6	8949.4	149505	8908.14	742105	18046	34738.4	11895.3	126703	804450	9390.79	781509	285004	213154	3030.53	4419.92	4537.04	387060	128955	191199	3232.64	17803.3	13189.5	24034.6	9008.82
20	TITLE 12	6.62544e+06	45310.2	313982	15287.4	96492	16155.2	72538.7	20303.9	11194.4	28830.9	8054.52	9473.6	8489.91	26037.5	448123	1.3301e+06	180888	176045	21601.5	33749.7	175902	75918.6	14728.8	84951.8	9114.61	148296	8877.37	744654	18111.2	35071.6	11786	127558	805859	9433.82	784470	290563	212020	4795.04	2872.41	5755.63	390263	120069	192881	3490.34	18443.2	12680.7	24778.4	9014.61
21	TITLE 13	6.65729e+06	42453.4	1.1641e+06	38534.8	212117	78760.9	209400	8933.24	8676.37	178155	100419	38980.6	103717	120483	2.33224e+06	5.15422e+06	122686	501102	646051	66956.2	220828	241987	226145	109331	8363.72	489300	4544.33	1.18084e+06	38336.4	51976.4	13182	239862	2.49704e+06	9413.35	1.1621e+06	986762	16152.8	15134.7	18184.5	52285.8	1.84947e+06	875367	3274.3	8870.2	12134	12693.4	54906.3	5757.53
22	TITLE 13	6.77323e+06	39175.8	1.16343e+06	37414.2	211740	79261.9	208196	11164.3	8471.02	180169	100007	39019.6	103867	122600	2.32426e+06	5.18929e+06	121668	504980	640546	69159.1	223391	242318	229263	113105	8331.96	491267	5180.99	1.18742e+06	40341.2	52387.5	13617.7	243197	2.48888e+06	10208.9	1.16155e+06	1.00736e+06	16945.1	14330.4	18273.8	53391.7	1.86029e+06	872951	2649.57	8985.26	13136	12295	53851.5	6649.53
23	TITLE 14	7.58371e+06	33771.1	662339	35664.8	181532	57828.6	180753	24477.9	13060.9	22429.3	29517.5	2117.08	29097.8	7976.93	1.22613e+06	2.98714e+06	88538.5	818985	348627	33532.1	314371	156615	60732.1	144854	4430.66	246384	3236.46	1.09269e+06	49772.6	62205	20721.2	243117	1.02935e+06	13144.1	1.09852e+06	580110	18293.3	5864.28	6755.97	12978	662725	406124	2137.44	5400.6	15433.4	11170.2	61181.3	10406.5
24	TITLE 14	7.69513e+06	31874.4	656973	34297	181067	58095	179011	23790.5	12735.5	23859.2	29859.4	2343.87	28831.7	9836.7	1.21881e+06	3.00865e+06	86829	821584	348088	33177.9	317408	156337	62607	145247	4937	242602	3438.8	1.09456e+06	50974.1	63076.7	21147.2	244817	1.02611e+06	12752.8	1.09843e+06	592991	17402.1	6964.79	7518.01	13730	667416	400763	2071.39	6608.15	15367.7	10277.9	63140	8339.99
25	TITLE 15	6.30947e+06	39229.7	861390	51322.6	224170	85969.8	224479	19180.5	17135.3	20355	31322.5	10227.3	33681.7	40781.7	1.6823e+06	4.2269e+06	117224	547904	442692	44561.7	249969	70767.2	43157.5	127089	6672.84	319234	6359	983352	38679.2	43579.6	12257.5	255905	2.38518e+06	9090.01	1.00736e+06	818615	12437.8	10909.1	9305.66	16994.4	1.75508e+06	535145	2358.87	3881.67	10460.3	11232.1	68614.8	4199.96
26	TITLE 15	6.41069e+06	38475.6	852945	51617.8	225466	85572.7	223611	19355	17322.3	20167.1	32401.7	9977.54	34297.5	42536.3	1.6696e+06	4.26623e+06	115899	551411	441420	45328.2	253643	73813.6	43567	130170	6113.87	315974	6444.16	988468	38034.9	42608.5	12210.2	257247	2.38249e+06	10448.8	1.01143e+06	839317	12458.2	10965.1	9633.97	17179.3	1.76917e+06	529762	2521.63	3712.37	10807.6	13408.7	68923.7	5476.35
27	TITLE 16	6.54432e+06	50316.3	2.30977e+06	189345	577558	327313	611018	36676.6	8153.19	65494.4	32660.4	4581.24	32970	27930.8	5.07316e+06	1.38882e+07	125167	2.19752e+06	1.31749e+06	535962	757235	535345	538414	358387	16603.3	907127	56920.1	1.58361e+06	126622	55104	49784.4	362361	704781	46286.6	1.57753e+06	2.58386e+06	16548.3	2353.73	5105.98	144767	346779	1.78411e+06	3475.73	13499	13212.9	6293.6	165924	6313.92
28	TITLE 16	6.6618e+06	51021	2.31441e+06	190136	576840	327882	612274	37543.7	10050.4	68273.3	32883.4	4820.94	34476.7	28406.4	5.08907e+06	1.40127e+07	121914	2.21325e+06	1.31994e+06	552223	775747	539244	546049	361140	16458.5	907766	58242	1.59306e+06	129692	55607.2	51360.3	364233	706353	47889.4	1.58052e+06	2.64858e+06	17260	2002.57	4745.15	147597	351822	1.78876e+06	4623.79	15448.7	13225.6	5453.91	167435	7575.91
29	TITLE 17	6.8801e+06	44846	230385	13419.6	79807.1	9981.59	60519.2	19222.1	8705.49	54674	10514	7347.74	10339	24371	471035	3.44719e+06	133627	434065	34731.4	35986.3	240596	97516.3	35177.4	118923	4698.97	93538.8	2638.53	1.11163e+06	26391.5	57977.4	11559	173445	844244	9171.23	1.15731e+06	699278	233645	4779.56	5217.49	6887.85	326110	73462.6	215963	4004.33	28660.1	12980.1	40770.3	15835.6
30	TITLE 17	6.97832e+06	44590.4	227513	13707.7	79096	8763.62	61017.2	19148.6	10252	55320.7	9997.78	6102.77	9740.38	23986.6	467904	3.46989e+06	134851	435614	40281.7	36264.6	243519	97270.7	35069.2	118721	5320.04	92546.3	3156.17	1.11568e+06	26168.8	57645.2	11120	173919	847040	10513.8	1.15973e+06	713845	233883	5944.56	5509.39	7473.98	328060	71516.6	216589	4046.39	29432.7	12329.5	40645.4	15240.6
31	TITLE 18	7.6818e+06	31377.2	377789	13333.4	95002.2	16616.9	74866.6	12068.4	6516.38	55074.9	11661	4954.29	11339.6	19992.6	652476	2.06364e+06	110352	301037	149488	45398.2	174374	43829	49460.8	85735.1	3594.32	130613	2926.33	1.16522e+06	22909.1	76373.6	10588.9	117520	738297	9061.84	1.19251e+06	396918	216913	3017.8	3423.77	6056.77	329139	182170	198501	3397.49	15768.8	10776	44820.8	7727.45
32	TITLE 18	7.77974e+06	32005.6	374755	13490.8	92792.6	14421.9	75892.4	12260.2	5592.32	55445	13317.6	4063.62	10818	20108.9	651983	2.07798e+06	109408	302593	151124	46307.2	177872	43169.6	49646.4	87121.1	3775.64	132276	2956.15	1.16908e+06	56772.3	75462.6	9434.16	119271	737618	9502.63	1.19615e+06	404236	217851	4682.35	3782.82	5143.96	331434	181182	198412	3863.35	15952.3	12160.7	44828.3	10277.9
33	TITLE 19	7.49625e+06	56728.6	345414	16906.1	139572	35158.6	112576	15440.3	7335.25	69662.9	19983.6	5309.44	20802.9	13768.8	581678	1.29619e+06	164247	225814	48864.5	40291.4	321042	140984	25630.4	136875	5057.88	116754	58659.6	1.17837e+06	25612.4	61328.2	11303.7	121303	632097	49731.2	1.20667e+06	280467	186187	3903.36	3776.63	5604.56	194465	118765	167000	3733.5	10015.3	11479	41182.1	5659.56
34	TITLE 19	7.61887e+06	56853.3	343973	17048.1	137750	34696	114815	13460.1	9368.6	70093.2	20866.5	5276.87	20667.6	19218.7	585961	1.30464e+06	167482	227433	49273.9	40547.1	327477	141659	24622.3	135821	6259.34	113638	56537.2	1.18087e+06	24543.4	60855.7	12212.1	122093	634992	50706.2	1.20985e+06	282691	186536	3927.69	3421.34	5401.61	196654	120097	168714	3209.04	9633.45	13884.2	41777.9	5424.24
35	TITLE 20	6.56911e+06	62644	462158	25813.5	188367	33117.7	156411	18511.1	13668.9	72822.9	21868.5	12103.2	21901.7	46306.8	583511	287431	222405	140168	59892.7	31299.7	330989	200870	18764.6	140844	14024.4	137899	40023.3	1.17128e+06	22497.3	64251.5	11479.6	109726	581679	33891	1.20428e+06	84886.4	223145	2314.09	2128.61	3515.05	141237	155611	202576	2919.3	6917.99	15309	29355.9	3202.81
36	TITLE 20	6.66331e+06	64958.8	465625	25671.1	187895	32159.5	156661	16834.9	14308.4	74688.7	22661.9	12596	23104.6	48661.7	589273	290232	223678	138807	59997.7	31968.7	335663	200263	18573.4	142243	15266.4	135349	40167.6	1.17548e+06	23752.4	64203.9	10595	110481	584429	34366.7	1.2066e+06	86684.2	222485	4173.5	2912.48	3546.58	143025	157434	202789	2878.32	6459.94	15603.4	29543	3351.87
37	TITLE 21	7.36311e+06	74748	586875	16544.6	149560	44372.4	125801	17838.6	11908.1	79208.7	9356.71	2652.66	8051.91	15937.2	866467	393538	138932	227726	73181.4	28695.3	388559	270661	10519.9	174123	14337.1	135990	13373.2	970737	22897.4	43570.5	10713.3	144880	553306	25107.8	1.00994e+06	108948	168457	4683.71	2715.39	6441.65	195510	215946	153191	3138.8	6907.55	11661.7	29770.1	3654.98
38	TITLE 21	7.48977e+06	74545.6	591296	16532.5	147742	42987.3	127500	17647.3	9991.27	79718.2	9456.06	2855.22	8313.5	17118.8	868614	396978	139742	229090	74364.2	30156.8	395720	272146	10684.4	174423	13739.1	138762	12903	978185	23561.3	43297.4	10427.3	147053	555970	25689.7	1.01609e+06	110712	169234	5337.24	3849.6	4176.34	196259	214057	153632	2655.98	5723.66	11516.1	29385.8	2909.08
39	TITLE 22	6.84857e+06	56076	319832	15643.5	81067.4	17022.1	50089.6	23981.3	11113.2	148850	19077.3	9080.5	19365.4	33454.9	648922	1.17615e+06	198635	205408	44488.9	28946.2	191334	116954	16661.1	94415.6	6548.42	135889	4475.9	1.24233e+06	16669.5	48491.8	7421.05	161550	1.08875e+06	7376.57	1.27923e+06	259755	220838	6719.09	4091.4	6669.45	601622	105031	195016	4229.49	26217.9	13629.6	40685.7	14306.5
40	TITLE 22	6.96807e+06	55293.5	321731	16657	82180.2	17326.7	50201.3	24970.7	12072.3	149566	19477.7	9032.98	18617.9	35342.9	649484	1.18691e+06	200043	207261	48878.2	30880.1	194668	116185	17910.8	96998.5	7642.89	133654	4713.04	1.24772e+06	17146.1	46948.6	9226.38	161173	1.09048e+06	7484.09	1.28019e+06	265747	219735	5144.36	5032.52	7951.93	607276	103894	197107	4030.18	26519	12906.8	40636.1	12950
41	TITLE 23	6.21353e+06	56865.2	399004	17808.4	111573	29875.6	80359.2	12967.6	8056.26	69672.1	22474	6482.67	23380.5	31765.2	449089	193833	194169	94372.6	48453	29568	272312	189173	8620.56	117702	13803.7	133297	9323.52	895341	15849.3	62295.5	9171.71	89536	414722	11971.1	936221	66146.1	190457	3414.1	3142.92	4328.44	54124.8	132030	173733	2853.65	3940.3	12650.1	19451.4	3213.44
42	TITLE 23	6.3006e+06	56721.4	396024	17166.1	114369	29566.4	82195.6	13344.1	8836.98	71518.9	23881.9	6968.28	24457.2	33320.1	447852	194368	194324	94146.9	49330.7	30663.1	276972	191100	8665.51	119655	12306.9	134307	9726.9	898718	16731	62628.1	9774.47	92641.1	411973	12298.4	939742	67917.5	192824	2979.38	2311.61	3423.8	55442.9	134229	174615	2211.5	5311.73	15536.5	18812.8	3218.67
43	TITLE 24	6.6441e+06	67666	525267	14949.5	141618	29043.2	113864	16335.4	9137.94	76609	14820.4	19732.9	15931.1	64383.5	873743	396709	168411	170448	89524.5	29236.7	414848	295812	6188.65	182343	11859.4	128927	26936.1	1.09227e+06	23376.4	51481.7	10706.4	178180	552690	20211.1	1.15977e+06	107374	159982	4513.15	2276.12	5385.76	175365	225686	156004	3553.72	10304.3	12960.8	18325.4	6236.05
44	TITLE 24	6.92678e+06	68962	528573	15820.1	143851	30123.2	116983	18098	8199.04	82454.3	15955.2	21898	14561.1	67831.4	875827	414405	170167	175487	90235.3	31462.8	438067	307342	8331.02	191053	12363.3	129833	27299.5	1.13342e+06	25822.4	55087.6	11428.5	184648	566990	20203.5	1.18338e+06	113119	168352	3984.74	2835.11	5605.33	180380	226402	158938	2860.76	11561.2	13369.1	20552.3	6819.49
45	TITLE 25	6.0576e+06	55236.8	347632	25052.5	139276	32181.2	110473	29054.4	17412.8	48749.8	14986	41994.6	14349	119608	694852	1.15289e+06	215079	302553	51445.8	37677.6	314054	46692.1	14193.5	147835	10806.9	149133	2907.54	940395	25354.9	46838.5	14926.5	182232	925895	7767.53	971498	261319	236226	3943.88	3178.36	6010.48	427551	107929	208409	4302.17	25537.7	14810.3	50690.8	12438.6
46	TITLE 25	6.14677e+06	55441.1	349261	24654.5	136775	34019.8	109182	27511.8	18424.5	48197.9	14871.2	42494.7	14957.8	121375	700655	1.16528e+06	217449	302041	51257.3	38818.4	319724	48125.1	14046	146496	11533.4	149514	1207.4	942768	25128.1	46947.7	14750.5	182300	928663	7298.68	974497	266545	235838	3635.89	3394.67	6831.85	431031	107817	209245	3303.12	25519.5	12191.4	50002.7	13555.1
47	TITLE 26	6.81936e+06	77271	535809	19459	167129	40215.2	140551	16149.1	11352.8	55005.3	37483.5	8494.6	40767.1	36717.9	875013	963424	190378	214835	80062.1	38795.7	386047	207643	18085.9	162025	10323.1	133920	42811.1	905486	22960.5	50838.9	11778.3	148078	653335	43917.2	947801	216404	234818	4502.1	3629.95	5580.16	158795	177992	214233	3075.47	13894	14284	25729.8	5827.34
48	TITLE 26	6.9353e+06	77659	533273	18189.4	167436	41177	141925	17718	11909.8	56155	38823.7	9382.87	40418.3	37557.3	879084	972084	189142	214202	79648.6	40289.9	392497	208232	18436.8	164401	10192.4	136370	44083.3	911490	22405.9	52901.1	12354.2	148857	657016	43939.3	950137	221218	233250	3645.94	4142.28	6639.15	159571	172906	213318	4403.56	12951.9	15771.1	27266.3	7234.57
49	TITLE 27	6.71139e+06	71411.4	550659	19838.9	183774	43419.3	157428	26437.9	14203.6	33649.8	12120.2	4173.75	12873.6	23296.1	874395	706850	167211	228906	84947.9	27096.3	427746	205298	12819.7	189328	14368.4	142127	4415.98	1.02391e+06	25119.5	50038.8	10586.9	187582	620414	25178.5	1.05512e+06	169207	187041	5388.52	3651.76	5420.68	221436	234578	170786	4203.16	13314	12270.8	28634.8	8772.86
50	TITLE 27	6.81519e+06	69806.9	551171	18323.9	181970	42668.6	157937	26889.4	14173.4	33953.7	12273.7	4815.96	12060.5	22454.7	874531	712878	164943	228804	84593.4	27952.5	435774	207336	14508.4	190379	12087.7	143946	5566.94	1.02719e+06	23444.1	50650.5	10294.8	189764	622585	26160.2	1.05685e+06	172181	189056	3511.22	4103.39	4906.23	223777	237379	169747	2533.88	14029.8	14221.7	27730	8286.1
51	TITLE 28	6.62961e+06	56285.9	322441	24491.6	125786	24815.9	95108.4	43988.5	36362.5	45333.9	16663.6	4517.6	17690.8	21612.3	541167	5.43789e+06	257874	403524	53937.8	57643.8	313378	167416	107974	166260	13603.3	143317	3080.94	1.17385e+06	34622.1	33616	11787.2	342080	3.6479e+06	2362.75	1.21394e+06	1.10689e+06	286120	16397.9	9321.04	15950.7	2.63156e+06	97393.7	260506	19934.5	49362	21565.2	64200.3	24600.5
52	TITLE 28	6.73456e+06	57873.4	322464	24386.1	128710	23530	94318.6	45613.2	38264.5	44134	17399.7	5784.6	17359.6	23627.3	542446	5.49504e+06	257856	406290	53036.7	59174.6	319163	167563	109088	164519	15407	145881	3503.03	1.18101e+06	36523	36149.2	13623	342575	3.64694e+06	1745.32	1.2157e+06	1.13144e+06	288202	17149.3	10646.1	12253.8	2.64955e+06	94438.2	260824	20266.5	51404.7	19239.9	65187.3	25286.6
53	TITLE 29	6.71991e+06	47052.8	816424	24033.3	180947	49272.9	169480	22604.1	11016.9	34629.4	22728.7	11753.8	24049.6	42131.9	1.41261e+06	2.58506e+06	146454	520448	256637	40684.1	423591	111054	40964.9	181715	9162.93	240959	64338.8	1.08757e+06	45115.9	41770.4	20298.3	262373	792681	58630.6	1.1266e+06	515925	217409	4367.22	5069.19	22310.6	250684	436475	204238	4324.2	15845.4	12965	52671.5	8793.52
54	TITLE 29	6.81142e+06	49147.9	807295	23979.7	179885	48348.5	167713	23425.1	11792.6	35426.6	22706.8	11966.6	22693.1	44841.7	1.39348e+06	2.59838e+06	147103	521845	257580	40729.1	429184	111902	42337.3	182480	8399.48	235730	64850.2	1.08897e+06	43603.5	43267.7	19876.2	262657	794174	57855	1.12571e+06	527114	216021	4595.89	3690.52	20564.6	253008	431311	203593	3609.77	15922.2	13023.6	54054.6	8828.06
55	TITLE 30	6.84161e+06	72877.1	536597	21544.3	165858	43220.9	146452	16380.4	10098	114511	73484	3401.8	78062.7	23881.4	833585	1.5185e+06	185660	261048	81944.5	31979.2	373192	133025	36235.7	159685	8819.27	137818	26404.8	1.07428e+06	28322.1	37848.1	15007.4	158205	564653	25576.6	1.11587e+06	324066	205676	3521.67	3178.39	4487.33	115105	224645	191764	3052.66	14902.2	17807.8	45704.2	7829.92
56	TITLE 30	6.94797e+06	73652.4	537627	23171.2	165649	42671.5	145988	15075.5	10421.5	115890	75875.4	3101.58	78816.1	23963.1	835202	1.53403e+06	185761	262911	77790.7	33233.6	381306	133693	36802.7	158170	9177.52	139379	27600.8	1.0783e+06	28140.8	38081.9	14388.2	158031	566545	26959.5	1.11908e+06	330487	203755	3257.7	2861.66	4350.25	114725	222612	192392	3556.8	16102.6	13515.7	44630.2	7064.36
57	TITLE 31	6.67827e+06	43414	839977	29544.6	212284	64260	199472	20362.2	16348.9	38175.7	25347.2	3491.5	26130.8	20564.5	1.59554e+06	2.24551e+06	160330	586278	418688	37668.1	305938	529920	47517.9	148012	20409.5	356491	12200.4	1.13388e+06	33449.5	36429.7	16926.2	152032	488190	17944.3	1.131e+06	452851	10545.7	2842.56	6154.01	46267.9	127339	598734	2809.68	5475.35	6255.52	15997.9	34537.9	3864.07
58	TITLE 31	6.80415e+06	45620.9	845750	28941.6	213867	65930.3	198184	19932.7	15523.8	38722.9	27227.4	4301.49	26643.8	21583.6	1.58849e+06	2.26929e+06	159509	592543	419090	39825.5	311635	532545	45884.4	147759	21329.5	356534	12244.6	1.14389e+06	33827.7	38017.1	17071.5	155213	489234	18640	1.1368e+06	462440	12429.7	2214.98	5343.46	46454.5	129470	602191	3167.85	5630.76	10354.3	14821.3	33584.4	2695.72
59	TITLE 32	6.73209e+06	41663.5	1.61481e+06	46869.7	241980	96609.2	228341	25528.8	14555.6	93110.6	83181.9	121952	86984.7	333703	3.32369e+06	6.98697e+06	157595	744485	947999	100809	255127	332100	190779	140359	17240.2	631676	13578.4	1.03414e+06	41287.3	25423.9	21067.7	326778	2.73215e+06	13496.4	1.01519e+06	1.33071e+06	15042.3	14263.9	17308.2	77403.6	1.95917e+06	1.20661e+06	2048.41	10893.8	10708.5	14086.8	54671.5	5275.26
60	TITLE 32	6.84713e+06	42144.7	1.61665e+06	46116	243026	96135.8	227994	25518.9	13855.1	93261.6	84496.3	125464	91040.9	342832	3.31297e+06	7.04633e+06	158664	749005	947074	102158	259805	333039	194554	142649	16066.4	630518	13564.9	1.04052e+06	42376.1	25792.2	19978.3	331569	2.73368e+06	13733	1.01896e+06	1.35906e+06	12919.3	13821.6	18126.2	79721.8	1.97585e+06	1.20554e+06	3190.53	11844.6	9284.1	13378.4	56622.2	5038.73
61	TITLE 33	6.44583e+06	49798.4	1.49034e+06	26900.8	218683	75615.6	194772	15206.7	12191.7	59112.2	25784.3	2011.21	26668.9	19315.8	3.06965e+06	971111	158190	500811	818178	39963.2	262481	376904	27078.1	134804	17587.9	614877	13006	1.60042e+06	36295	52981.7	14883.3	155061	609497	22363.8	1.59512e+06	211346	11577.4	5247.41	8964.32	83626.6	236499	1.12955e+06	3133.37	4017.72	6467.35	14432.9	44297.5	3656.06
62	TITLE 33	6.55146e+06	51940.2	1.49427e+06	27580.6	215752	77000	193763	16712.4	11926.4	57591.9	26476.4	1904.02	28083.2	20088.1	3.07904e+06	981296	160305	503869	816812	40144.2	267063	378080	28739.3	136051	18979.8	616212	13657.9	1.60848e+06	35455.6	53821.6	15992.5	155646	611718	22393.2	1.59824e+06	216295	10629	5941.83	10343.3	86395	239193	1.12854e+06	3188.62	4336.23	9219.19	14010.9	44570.3	3787.29
63	TITLE 34	6.82192e+06	37742.9	898661	20012.5	161625	34254.1	148382	14585.7	12070.5	79339.6	32466.6	7628.58	31418.6	30166.4	1.86024e+06	1.69371e+06	117242	645527	508285	39003.5	258945	120686	22254.4	122482	4832.92	301479	9091.52	997928	37929.1	31866.9	13443.9	167199	2.84646e+06	14480	1.00424e+06	344403	10833.3	14314.6	17761.3	17710	2.09624e+06	585270	2718.54	3119	15263.9	12408.3	58486.2	7699.07
64	TITLE 34	6.9502e+06	36308.3	893990	19892.9	161487	34792	146221	14697.2	11716.9	80534.8	32680.1	8602.64	31314	32178.5	1.85557e+06	1.71307e+06	116616	649037	507429	38604.1	263722	122048	22259.8	124023	6182.61	301320	9758.56	999075	39285.2	31869.9	14012.6	170412	2.8448e+06	15290.3	1.00607e+06	351434	12319.3	16567.8	19606.7	17562.7	2.11563e+06	582124	3074.9	2475.27	14292.4	12816.2	59362.8	8729.97
65	TITLE 35	6.72459e+06	50270.7	714421	24232.6	151595	32083.9	131223	21312.4	18025	22609.7	42395.4	3437.12	42630.6	17690.4	1.22419e+06	7.96307e+06	187114	533174	278136	42688	209117	164804	70194.6	121959	9603.48	257926	9435.82	1.08443e+06	37005.7	32399.3	11815.7	218627	2.62871e+06	8262.31	1.08614e+06	1.51262e+06	12407.3	15075.1	15087.8	13491.6	1.89053e+06	402704	3013.43	7918.06	10452.4	17094.7	45488.4	6194.55
66	TITLE 35	6.86933e+06	52329	709042	24977.3	151488	31680.6	131992	20362.1	17564.1	22210.9	41167.8	2659.69	43208.2	19706.5	1.22145e+06	8.06115e+06	187762	539040	278369	44165.7	211792	163346	71573.7	121512	11264.1	260456	9218.74	1.09264e+06	37015.5	34103.7	11698.3	219002	2.6317e+06	8882.05	1.09353e+06	1.55148e+06	9175.06	15794.9	13107.2	15083.1	1.91071e+06	402432	1920.82	7812.87	11177.6	13806.6	45561.7	5305.3
67	TITLE 36	8.00338e+06	28914.3	938778	33362.8	163391	53186.9	158814	33402	12351.9	30111.3	28960.2	13281.4	29412	43213.5	1.80063e+06	8.57151e+06	100337	778000	517738	44128	266206	187526	79651.1	139708	4920.93	314015	15081.9	915592	48630.9	25627.1	16122.7	262664	2.51689e+06	10217.9	916308	1.60421e+06	9407.05	11997.1	15881	20016.2	1.81052e+06	591077	1828.9	7865.33	11508.5	12886.9	53064.9	5968.34
68	TITLE 36	8.14555e+06	28531.8	936715	32584.3	164484	53821.3	158387	31900.9	12807.7	29593.6	29730.4	12843.1	30203.8	46030.4	1.79397e+06	8.67204e+06	102322	783699	517596	45675	270413	187832	79585.7	141312	5484.76	311816	16468.3	918938	48950.7	25738.7	16411.9	265999	2.5164e+06	10628.6	922330	1.64778e+06	13277.2	11118.8	14815.8	19688	1.82844e+06	590798	2498.78	6278.41	12962	11960.2	53183.7	6076.11
69	TITLE 37	7.15651e+06	43031.6	936007	18402.4	133419	30187.9	119014	25666.8	12217.9	57648.6	55202.7	3236.73	55100.4	9477.35	1.87116e+06	1.93912e+06	120766	470401	477084	33281.8	240936	126625	17363.5	114952	5522.22	325436	8481.61	818374	31999.2	20912.8	11418.7	185127	2.33102e+06	10648	815340	378931	13053.6	12776.4	16109.7	24869.7	1.69044e+06	587622	3146.46	3612.63	13221.7	12781.3	48941.7	6953.86
70	TITLE 37	7.27901e+06	45184.4	928825	16101.6	131088	29890.9	120601	24858.2	12059	57821.6	55218.9	3900.93	55848.7	10684.9	1.84331e+06	1.94985e+06	120910	471499	474046	31497.4	244851	125041	18601.7	116864	5824	322123	7973.79	821195	31000.4	20735.5	11258.6	183760	2.3324e+06	10468.5	818062	385951	13580.3	11579.8	16596.4	21866.9	1.70053e+06	584465	2426.29	3560.2	13733.6	11356.8	48886.1	7229.5
71	TITLE 38	7.06539e+06	45134.8	384968	22284.5	112012	16726.2	94150.3	32798.4	13815.6	95445.1	38733	18711.7	40030.1	62968.4	577392	7.61411e+06	179744	549708	55738.2	42322.8	240559	74156.9	53871.9	125677	5802.01	126187	6917.23	1.39721e+06	35898.1	47745.2	11330.3	261049	4.44589e+06	7875.35	1.42674e+06	1.54624e+06	248485	23754.8	25434.6	19415.5	3.29886e+06	118582	224814	4950.09	31463.5	17272.9	62255.9	15669.6
72	TITLE 38	7.16361e+06	45455.5	384701	20607.9	110634	16495.5	93734.9	33172.6	13080.3	96412.3	40130.7	19256.4	41795.5	64867.9	579121	7.67904e+06	178623	553592	54182.9	43082.2	244351	72970.4	53540.2	124558	5659.11	123842	8058.53	1.40266e+06	36239	47701.9	11649.5	266399	4.4373e+06	3287.03	1.4297e+06	1.5792e+06	250780	25451.9	25533	20512.4	3.32068e+06	116964	224200	5358.97	32044.8	15507.6	62456.3	16841.7
73	TITLE 39	6.91369e+06	77121.6	496780	17112.6	127153	21239.4	99135.5	19513.8	10589.5	51898.7	54870.8	8197.73	57332.7	37323.3	881661	933584	221246	197749	67597.2	28473	291554	414736	11855.3	132280	15395.7	171665	46597	1.43319e+06	23326.5	50105.4	16167.4	149542	658047	32987.4	1.48542e+06	213200	257238	4879.46	4398.39	7513.37	162582	163943	236876	3950.65	9091.57	14753.3	27563.1	6310.76
74	TITLE 39	7.01644e+06	77019.6	495076	18642	128948	21251.4	99628.1	19893.6	10951.5	52185.6	56283.2	9744.57	56181.3	38904.6	884902	943558	221967	197367	67233.9	29408	297598	416326	12374.6	133224	15769.5	174825	46001.7	1.44085e+06	22581.1	50892.8	16538.1	151194	660886	32285.2	1.4903e+06	216658	257338	4670.15	4790.98	4563.69	162480	162095	236608	3380.45	10478.6	16530.1	28666.8	5402.22
75	TITLE 40	6.49446e+06	101092	757218	26519.1	158598	31077.5	126750	26279	13617.6	24682.7	57825.7	8325.22	61293	36311.4	1.24763e+06	784404	286562	274764	113120	32256.2	408762	397749	10032	180252	11058.2	230916	63983.1	811693	21719.7	15949.2	12925.8	187824	768011	48260.8	870512	190722	246916	7277.68	4386.85	6716.57	237665	296583	225629	2779	6477.89	21472.9	18189	5277.09
76	TITLE 40	6.58462e+06	97300.1	758935	26431.6	156775	33123.8	126229	25400.9	13141.9	25533.7	59898.1	9251.37	62663.2	36783	1.25168e+06	791557	284970	274184	112987	33163.8	415860	398132	9384.41	179126	11383.9	230176	65671.8	813817	23525.2	16113	12580	191807	767208	48951.1	871605	196401	246252	7093.3	5341.81	5049.06	238979	298359	226628	3367.09	6931.93	19025.2	18437	4412.48
77	TITLE 41	6.97052e+06	66887.6	486637	27822.8	203456	56761.9	187455	19733.1	18032.1	25078.9	59042.8	7362.41	62584.9	30953.9	742168	1.54043e+06	214054	410380	70789.3	28483.9	463571	200322	13246	196278	12784.7	159743	138005	1.03721e+06	41580.6	26030.6	22370.3	255577	766521	111652	1.07716e+06	340125	215095	4892.21	3729.34	5178.71	214275	180136	199732	2521.47	10789.1	15945	47677.3	6657.25
78	TITLE 41	7.08384e+06	66432.2	489289	27379.9	205395	55642.3	186683	21448.1	18973.7	24533	61208.1	7754.62	63213.2	31984.2	747129	1.55505e+06	214241	414120	72327.3	30858.9	472188	200571	12924.7	199099	13120	159454	141366	1.04331e+06	43896.4	27204.5	21577.7	256625	770139	112560	1.07858e+06	346252	214720	4343.87	4155.42	5925.63	217630	183442	200245	2996.72	11575.7	14861.5	48205.8	6667.27
79	TITLE 42	6.86862e+06	61495	372361	28614.9	170029	44335.1	164241	20755.6	16786.7	28748.7	20976.6	3364.21	22854.9	12004.1	617094	4.28626e+06	176790	339644	52984.9	34241.8	299172	144517	40947	130209	6903.78	128713	49623.5	1.0373e+06	35277.9	25234.4	19096.2	152404	605383	49628.6	1.08911e+06	872051	218479	2263.3	2782.86	4906.39	92514	122254	205624	4753.12	6933.15	13167.8	42417.9	5280.88
80	TITLE 42	6.96988e+06	61774	375282	29167.1	171266	44217.9	163000	22461.7	15567.8	28088.4	22212.8	4639.09	23541.9	11815	617232	4.32337e+06	176862	341279	51309.1	34512.7	303394	144654	41670.4	133682	4641.73	128892	50610.8	1.04118e+06	35271.8	25908.9	18503.6	151396	606813	49202.3	1.09087e+06	890660	216919	2389.34	2321.71	4529.14	91209.5	124696	204994	5420.55	6987.35	14247.2	44236.3	4103.59
81	TITLE 43	6.89289e+06	94431.2	644826	21869.1	158641	26531.8	115488	25443.9	13007.3	54178.4	17969	9408.12	18635.5	31815.4	983439	646973	277543	265388	98242.6	26612.1	481401	433538	12621.3	208196	17808.1	193443	50381.3	1.10708e+06	26724.2	28581.5	14440.3	175017	693811	35288.9	1.15234e+06	164106	238854	3787.01	4330.66	5722.27	186307	256835	215559	3565.74	9863.83	17350.5	19423.7	5436.21
82	TITLE 43	6.97824e+06	94109.8	649408	20953.6	158771	28376.5	114918	25687.4	10280.3	55045.7	18667.4	8979.45	18716	32606	981879	651090	275793	267145	96103.2	27883.7	488546	435455	13531	208823	17181.1	193142	50914	1.10577e+06	26657.9	29237.6	15747.2	175068	696474	35392.4	1.15488e+06	166207	239857	5418.84	2767.27	5428.88	185714	257638	216471	3461.65	10701.8	16833	19867.4	5819.17
83	TITLE 44	6.84182e+06	52741.3	268846	18436.8	77943.5	15322.6	58933.5	24893.9	17043.3	49047.8	10842.4	24273	11347.8	72510	622732	1.46246e+06	234018	189626	42224.4	29659.3	159115	62140.6	16110.7	84977.6	10991.8	106210	5280.39	1.09858e+06	24205.4	29083.7	12276.7	171211	2.14727e+06	7439.23	1.12696e+06	321928	277120	9594.8	12524.6	11133.5	1.43713e+06	86126.2	249462	4172.28	30997.4	16410.5	39077.9	16991
84	TITLE 44	6.96877e+06	52958.3	271580	18042.1	79240.1	16509.7	59818.5	25724.5	16044.6	49533.1	10483.6	24751.9	10979.3	73822.9	628271	1.48067e+06	236806	190263	41994.7	30750.3	162304	61619.8	16569	84117.8	8672.91	107342	5936.31	1.10225e+06	24405	28553.2	11763.7	172592	2.15042e+06	7443.64	1.13387e+06	330563	274924	10798.5	12335.6	11577.8	1.4508e+06	87322.6	249433	4530.85	32691.4	16653.3	38577.7	17879.4
85	TITLE 45	6.92187e+06	78224	567063	25747.9	167767	33610	130710	27629.7	17896.1	46138.3	18591	3430.2	17827.4	21379.7	972346	918993	231744	259074	83211.2	27515.9	382666	373949	18892.7	172762	15956.5	150273	87009	1.27738e+06	28053	58640	15628.1	191022	841837	65591.4	1.31803e+06	216990	252181	6115.12	4703.06	7278.24	286596	219725	231939	4709.35	5854.22	16162.3	28701.7	3568.23
86	TITLE 45	7.01381e+06	78339.3	566716	24860.4	166398	34772.9	131683	28294.8	16806.4	47621.2	18176.6	3902.6	17696	20960.4	970963	926347	234878	257197	84588.3	27367.6	388607	374896	19241.4	172617	16562.6	151203	85819	1.27813e+06	27410.6	58456.3	15697.9	189766	843347	67914.6	1.31888e+06	220658	253823	5941.06	5049.16	5728.28	288079	219777	233090	4167.02	5593.61	16342.5	29009.8	2869.41
87	TITLE 46	7.04764e+06	58413.5	349618	17091.8	85285.4	26720.8	56499.2	25152.8	12571	39301.1	21159.6	11414.1	21710.4	39863.7	660849	2.01707e+06	243660	189701	50493.7	25313	186342	191571	27229.9	97414.1	12412	159379	8645.76	1.01414e+06	22107.1	28525.4	11056.5	184526	1.59261e+06	6746.09	1.06376e+06	428879	245244	8599.98	10648.5	7779.35	932187	112246	217971	5394.75	31568	15959.6	42500.8	16074
88	TITLE 46	7.16444e+06	60663	352295	18507.7	83857.7	28304.8	57107.7	25931.4	11010	41003.5	22794.3	11424.4	23165.5	39248.6	659122	2.04137e+06	245180	191414	50820.2	25924.6	190034	192544	28036.4	96236.9	11193.8	159375	9591.11	1.01905e+06	21324.6	27865.5	11282.6	186950	1.59228e+06	6437.52	1.06629e+06	438132	245194	8284.9	9739.3	7956.62	939380	116545	219513	5680.77	31806.2	16080.5	42435.8	16485.5
89	TITLE 47	7.12862e+06	81234.3	561111	21090	160890	30209.8	129473	22750.7	13521.5	674186	12984.2	3992.27	12762.6	21526.2	914799	534217	234567	223585	78471.6	24594.1	395961	266107	17742	170176	15844	161404	45102.6	1.01406e+06	26115.5	27318.5	14944.1	187403	635531	34533.6	1.05284e+06	133052	210530	5453.36	2681.85	5657.68	173669	233585	192784	4407.28	8917.55	15209.3	21840.2	6560.38
90	TITLE 47	7.25404e+06	82583.6	566103	21114.4	162570	30143.3	130708	20333.6	16429.2	679490	12887.5	5176.65	11971.6	18227.7	920212	536643	236370	226501	78899.2	25962	402077	265332	17513	173076	15550.3	164082	44303.5	1.02127e+06	24885.4	27596.1	14743.2	186374	637962	34249.9	1.05654e+06	136103	210473	4192.55	5165.89	4978.57	174685	235379	192860	3565.23	8128.14	13764.1	23023.2	4074.48
91	TITLE 48	7.1886e+06	53170.7	382834	15325.5	72198.4	19098.8	42052.5	27641.1	9817.57	137850	35665.4	16067.1	36066.4	51302.6	565896	1.4103e+06	219774	182942	49761	31054.8	148153	229341	17912	82787.6	10832.7	152609	10176.2	1.06737e+06	23764.3	22712.6	9440.24	259353	2.36804e+06	6680.42	1.11007e+06	310914	234511	14042.1	13774.2	10766.4	1.59937e+06	134229	210648	4041.43	28567.4	15737.7	41668.6	15004.8
92	TITLE 48	7.30684e+06	57362.1	384165	15553.9	72065.6	18454.2	41002.9	25364.2	10884.6	138677	34743.6	15356.6	36861.5	51123.3	563948	1.42272e+06	219248	184544	47571.8	32673.9	151296	229865	17303.1	83697.5	10471.3	156262	8922.42	1.07162e+06	24273.9	25283.3	10888.4	259161	2.36752e+06	5929.02	1.1102e+06	317112	233421	16055.8	15298.7	14019.8	1.60998e+06	130616	208942	3847.47	30046.2	15900.7	42465.8	14262.1
93	TITLE P1	6.62346e+06	45447.5	562556	71638.3	259757	114994	264030	22675.6	8913.64	71687.5	27940.2	6720.12	28438.9	32254.1	1.00479e+06	5.37762e+06	146383	818543	166935	176689	380162	195174	225122	178378	10634.4	197372	20511.9	1.18519e+06	50007.3	46669.2	18990	282901	1.76475e+06	21512	1.20715e+06	1.00783e+06	103584	7810.9	9112.88	10594.2	1.19318e+06	305868	94104.3	6846.51	15206	14660.8	79558.4	7341.42
94	TITLE P1	6.72049e+06	47290	552055	71556.6	259959	112233	264058	25022.2	11679.3	73166.2	27865.6	7243.47	27951.1	33638.4	979643	5.42054e+06	144486	822374	163647	182829	384546	197247	227520	178910	11435.5	193687	21076.4	1.18815e+06	51534.2	48146.1	18231.8	282338	1.76282e+06	21498.8	1.21047e+06	1.03094e+06	102615	8508.65	8797.09	10878.7	1.2028e+06	297319	95087.7	7897.92	15362.4	14182.1	82229.9	7006.3
95	TITLE P2	6.4342e+06	47959.3	563530	71289.8	261280	112839	261799	23192.3	9583.58	71777.2	25400.1	7251.7	26108.5	32380.7	987639	5.33157e+06	148666	816981	164445	174684	376162	197000	221636	178622	11389.1	199063	19526	1.18401e+06	51394.7	47732.9	18817.3	285649	1.77123e+06	20252.9	1.21389e+06	1.00414e+06	103319	8420.63	8450.96	10016.8	1.1994e+06	303219	94153.1	7684.39	14362.3	13411.2	81606.4	10027.1
96	TITLE P2	6.57076e+06	45403.4	554801	71007.9	257034	112401	263396	22707.4	11064.6	73322.5	27500.4	6652.57	26694.8	33281.4	967580	5.40589e+06	144961	823144	158318	181343	381835	196936	225989	177280	9995.24	193272	19797.5	1.18916e+06	50297	46647.4	19194.7	285258	1.77171e+06	19733.7	1.21792e+06	1.03002e+06	104638	7895.74	8038.96	8451.88	1.20941e+06	297580	94610	6741.65	13760.1	14148.5	81907.1	7781.57
97	TITLE p3	6.5068e+06	48365.6	560149	71180.5	260344	112856	265488	22138.1	12554.8	73631.5	26574.2	6734.9	27691.8	33899.6	972794	5.38607e+06	150564	824013	157534	176775	379018	199496	225580	176847	10962.5	193721	19450.5	1.19257e+06	49330.9	47647.1	19179.5	287696	1.79307e+06	20809.6	1.22392e+06	1.01393e+06	105083	8462.94	8643.22	10407.7	1.20977e+06	296073	95972	5875.67	14846.6	15938.4	82445.4	7611.79
98	TITLE p3	6.61585e+06	43899.7	548846	72958.6	260344	113139	266039	24292.5	11176.9	73539.9	27068.5	6803.36	28059.1	33597.3	952583	5.44484e+06	148593	829356	154542	181286	385402	200338	227795	180644	10345.5	190122	19107.4	1.19849e+06	49864.8	47276.5	20299.9	291698	1.79483e+06	20562.5	1.22943e+06	1.04175e+06	104688	7319.51	9690.87	8671.83	1.2227e+06	288605	96063.7	7322.8	14128.3	14490.3	83517.9	7488.12
99	TITLE p4	6.66009e+06	46279.7	556709	72638.8	264183	115169	267980	24068.6	9813.84	74914	27987.4	6953.21	28286.9	33432.8	960869	5.45695e+06	148789	830056	155539	180809	385185	199461	228136	181681	10562.9	192133	21067.2	1.20383e+06	51737.6	47096.5	19065	294714	1.79565e+06	22407.3	1.23022e+06	1.02838e+06	106795	8469.56	9068.79	8594	1.21558e+06	288975	97467.7	7504.59	15479.8	13705.7	81715.1	8445.49
100	TITLE p4	6.78609e+06	47046.9	546116	73687.9	262742	117081	268698	22804.7	10396.5	73888.6	28174.1	7861.03	29058.1	33902.8	942366	5.52212e+06	150029	835450	149292	186907	393782	200252	232298	182752	11038.9	184538	20863.6	1.2108e+06	51173.1	48808.2	19598.4	297484	1.79633e+06	19813.4	1.23519e+06	1.05374e+06	107552	9094.14	9348.21	8247.07	1.2291e+06	282755	97230.1	6057.54	14401.1	14916.8	82429.7	7996.4
101	TITLE p5	7.12024e+06	54073.4	517267	24275.3	153355	38836.8	136990	19822.5	12752.6	60558	36994.5	6621.22	37172.8	24044.7	917332	1.65561e+06	160729	353066	141583	34643.8	288728	233845	32784.8	129469	8156.48	180539	19789	1.04373e+06	27498.1	40351	13681.2	184951	937349	21678.5	1.05675e+06	340026	114521	6558.3	8371.24	7585.18	508362	270972	104778	3878.54	13031.9	14943.5	34698.5	6572.23
102	TITLE p5	7.25116e+06	54127.3	514783	24460.9	152867	38949.1	135222	19677.8	12329	61843.7	36734.5	6643.71	38243.8	25663.2	906270	1.67122e+06	159539	356165	141298	36800.5	294842	233279	32983.1	128356	8786.2	181788	20463.6	1.04595e+06	29744.2	39455.3	12818.1	185265	937863	22753.5	1.05601e+06	345369	115124	6256.63	6720.8	7351.38	511053	264986	105176	3833.43	13225.5	14641.5	35899.4	6415.16
[truncated: 38 more columns]

## Sheet: rawdata
0	intervals_name	TSP	cholesterol	LP (CH3)	leucine 1	Valine 1	isoleucine 1	valine 2	isobutyric acid	2-oxoisovaleric acid	propylene glycol	2-propanol 1	ethanol 1	2-propanol 2	ethanol 2	LP (CH2)	lactate 1	lysine	alanine	LP (CH2CCO) 1	acetate	methionine	glutamate	succinate	methionine 2	aspartic acid 1	LP (C=CCH2C=C)	creatine 1	myo-Inositol 1	proline 1	methanol	proline 2	isoleucine 2	glucose 1	creatine 2	myo-Inositol 2	lactate 2	sucrose 1	β-mannose	α-mannose	LP (CHOCOR)	glucose 2	LP (CH of unsaturated lipids)	sucrose 2	fumarate	tyrosine 1	1-methylhistidine 1	histidine 1	tyrosine 2
1	TITLE 1	6.60403e+06	45137	539614	24159.2	154516	50158	140101	13758.5	10020.3	28095	37923.7	2471.57	37918.3	7212.32	1.0159e+06	1.94001e+06	132352	512418	204326	44151.7	219982	57134	57529.3	107452	4664.53	206386	4250.09	1.29902e+06	27333.3	72750.2	11760.5	161756	1.0004e+06	9238.99	1.29784e+06	393031	10458.9	4263.13	5543.05	14502.7	643802	313643	2197.59	4522.5	16646.9	10225.7	51583.5	10362.4
2	TITLE 1	6.72675e+06	44328.9	537145	24277.5	153798	49916.7	138921	12589.9	10390	27668	37446.3	3264.7	37155	7953.26	1.00991e+06	1.96024e+06	129978	515750	200473	45881.8	222319	57158.1	58275.9	108792	4946.96	202042	3642.81	1.3041e+06	29114.2	71816.1	12455.8	163172	1.00062e+06	9071.16	1.30201e+06	402632	6696.22	4379.01	4370.8	14541.6	648519	312582	3360.75	4541.74	17340.9	12519.2	52941.8	8744.88
3	TITLE 2	6.44872e+06	27726.9	1.17416e+06	195183	546242	309053	574314	29809.3	8499.72	66327.6	25059.6	1412.76	25541	16735.3	2.5322e+06	1.26951e+07	93989	1.84831e+06	661604	705060	528979	204849	877447	259065	12487.4	477009	17296.1	1.03542e+06	94760.9	26860.7	33907.3	321836	5.46171e+06	6592.19	994590	2.36643e+06	12775	21518.4	24508.2	55478.1	4.33263e+06	896362	3820.08	14473.2	13937.6	6540.32	181096	7982.17
4	TITLE 2	6.57043e+06	26879.5	1.16513e+06	195351	547228	309542	574849	30556.2	6972.35	66394.8	26181.9	3358.36	25735.2	17738.7	2.51126e+06	1.28194e+07	87826.4	1.85713e+06	656227	722678	537848	206705	890217	260621	14709	473169	16515.9	1.03872e+06	100312	27481.3	33604.1	318002	5.457e+06	7089.74	997244	2.42526e+06	11761.4	19086.8	21006.7	48511.8	4.36314e+06	894553	2264.64	15477.6	12330.3	5376.26	182086	6484.37
5	TITLE 3	6.74083e+06	67082.8	729637	27589	217553	65201	193319	12260.4	9230.21	41624.7	20036.3	1994.01	19334.2	11343.1	1.21419e+06	948986	192016	433175	199866	34739.1	294811	77506.7	30073.6	126997	10518.7	264772	8340.49	945371	33481.1	33932.1	14342.5	148716	494644	13106.2	948124	218659	9668.18	5171.6	5811.29	22441.9	223696	409351	2775.15	3482.01	6076.23	12527.5	47488.4	3274.11
6	TITLE 3	6.82379e+06	67154.7	726110	25201.8	216363	64458.1	195953	12377.5	9644.79	42911.1	18526.9	1718.52	18384.8	12481.1	1.20771e+06	954498	190664	435386	200983	35479.4	299223	75973.2	30372.5	127721	11521.3	260006	9021.71	949247	30775.1	35116.6	15026.5	148340	494276	13798.4	948250	220794	8754.4	5457.96	7247.6	22878.4	224637	406900	2132.29	1957.12	5099.03	14168.5	48141.1	3269.98
7	TITLE 4	6.81647e+06	32362.1	589618	101452	365977	153944	376075	33383.4	12844.1	63077.7	72763	9397.97	74864.5	39641.6	1.04878e+06	1.20754e+07	100445	1.46611e+06	256694	268347	457559	96903.9	384595	208450	4045.65	212397	13956	1.04078e+06	79719	27977.5	26202.4	472232	3.80455e+06	13297.1	1.01977e+06	2.3215e+06	13957.8	18850.6	20851.1	9045.03	2.90793e+06	372400	2060.84	13755.3	10530.6	12525.1	136111	8318.99
8	TITLE 4	6.92909e+06	28493.4	572690	101832	364177	153833	376945	32246.7	13561.7	66368.4	72858	8977.02	74636.8	43779.2	1.03773e+06	1.21778e+07	96918.2	1.47269e+06	248499	273918	463845	98782.6	387500	211855	3871.22	204275	13765.8	1.04401e+06	82415.6	26813.6	27066.6	476653	3.80632e+06	12406.9	1.02347e+06	2.36557e+06	11134	20226.1	22887.7	8532.2	2.93141e+06	357063	4011.03	13765	11182.4	12585	137984	6605.56
9	TITLE 5	6.73304e+06	51073.6	442282	26360	231350	63262.5	208215	21721.1	17415.3	58054.8	22120.4	11133.7	23216.8	35011.2	723361	3.00826e+06	209326	724254	85404.9	33720.1	443910	203632	29390.8	188112	12302.9	171890	138865	1.10765e+06	53450.9	30516.7	26139.8	240143	638928	115206	1.14268e+06	614259	241722	2333.08	2880.87	11183	57338.5	232945	223599	3329.32	23767.1	15361	50607.4	12003
10	TITLE 5	6.83767e+06	47816.8	438095	25173.3	228216	61824.7	208446	20226.1	17437.1	57456.6	21742.9	10448.3	22244.4	36524.4	719756	3.04565e+06	207089	731031	85898.3	35413.7	452542	203394	30731.8	189023	11404.7	167498	136638	1.11149e+06	52597.3	30024	26362.4	240444	642116	116612	1.14571e+06	627492	242346	2979.98	2886.38	11824.2	56966.7	232046	221700	4622.3	24447.1	16547.9	51513.5	13005.3
11	TITLE 6	6.80497e+06	54331.3	353223	12093.1	70115.7	15116.9	42236.4	21314.1	11017.3	117902	22939.3	16600.6	22348.1	47072.9	590590	1.65268e+06	170757	112975	44191.9	27586.4	102338	42487.2	13424.8	60990.9	4579.98	128125	5486.32	1.21113e+06	18243.3	43587.6	6960.7	137550	2.60852e+06	3645.04	1.24832e+06	354672	231148	13845.6	16506.2	12544.7	1.85882e+06	116527	206932	2760.47	13724.3	12031.4	22046.2	7081.66
12	TITLE 6	6.90257e+06	54712.6	353393	10814.2	69362.3	14120.9	44149.5	20557.4	9974.07	119611	22807.7	16340.6	22248.9	48268.9	590414	1.66783e+06	171791	113930	44859.8	27272.9	103726	40601.5	14121.9	60704.9	5519.34	129861	5875.01	1.21529e+06	17777.8	45577.6	8022.08	139693	2.60571e+06	4770.83	1.2505e+06	361622	233414	12220.4	16180.1	11884.9	1.87032e+06	115784	207640	2363.8	14808.5	13813.5	21851.8	8243.01
13	TITLE 7	6.51473e+06	52476.2	392123	17224.4	148532	35563.7	119723	17280.2	8603.76	59056.1	21910.7	7579	22085.6	26725.2	488068	1.84276e+06	189321	243861	41032.4	32941.3	284446	95131.5	21790.9	131532	10700.8	127139	32895.6	1.02849e+06	22041.7	33629.3	11490.5	109130	607331	22264.2	1.06765e+06	387897	210279	5005.9	3893.48	3926.6	153919	124977	190629	2910.72	5202.56	7765.67	32669.6	4362.19
14	TITLE 7	6.6154e+06	53843.2	392122	17249.5	150355	37227	118661	17116.6	11693.1	61949.7	21948.9	8781.63	23335.6	29727.9	489994	1.85668e+06	193262	245234	40487.9	33290.6	288488	95582.8	22006.6	132072	10544.5	128171	33835.7	1.03217e+06	21794.9	33618.8	10962.6	107143	610130	24377.6	1.06996e+06	395968	211378	3836.89	4244.36	4067.51	153503	128932	189657	3738.44	5426.81	10157.7	32854.6	2167.61
15	TITLE 9	6.82545e+06	66724.4	554637	25512	204569	57607.6	180437	28384.3	13475.7	80211.9	23111.9	17188.9	23022.8	54498.1	926114	925210	176820	330669	91177.6	40378.6	452769	395931	19153.7	198532	16831.1	172252	13481.8	1.28998e+06	37414	64275.3	14270.2	200113	751383	14914.4	1.33176e+06	220879	218411	6096.55	6199.81	4258.38	269726	268765	202055	3449.09	16919.2	13383.3	18800.2	8613.9
16	TITLE 9	6.93356e+06	69560.5	555950	26064.7	203359	54959.5	182482	27758.2	14150.1	80931.2	23958.3	18605.4	23619.9	55886	928108	935369	175545	334616	91263.9	40955.1	460575	401372	19374.1	198688	17968.6	171865	13948.1	1.29512e+06	34901	64454.7	14753.5	202819	754467	15140.8	1.33622e+06	227915	221115	5544.24	6110.21	5926.34	271594	268862	202059	4174.04	16367.7	15087.7	18107.7	9864.06
17	TITLE 11	6.8325e+06	81796.8	667169	23697.5	180645	48333.7	149082	21128.5	17882.7	79673.6	5918.58	7177.87	6182.97	30527.8	1.05268e+06	1.21681e+06	202110	315490	101503	36145.3	428204	223470	17546.7	188977	14752.1	172352	31227	1.07644e+06	28310.6	44137.1	13315.5	170708	621600	40645.1	1.11434e+06	268523	201303	3808.07	4153.82	4184.07	195847	296030	179436	3967.41	11077.8	12778.2	21716.9	5917.1
18	TITLE 11	6.91436e+06	82290.1	668669	24251.6	180741	48902.8	149608	18728.7	18777.4	82734.3	6716.66	7436.71	7050.87	29512.9	1.05444e+06	1.22294e+06	199536	314377	102281	36856.3	435938	224387	17741.2	189787	14036.7	172666	31287.6	1.07725e+06	27051.4	44956.8	12178.5	172837	622970	41395.4	1.115e+06	273398	201699	5116.44	2692.65	5009.46	195502	292275	179067	3476.8	12511.6	14474.1	22642.5	5833.07
19	TITLE 12	6.52343e+06	45246.5	314645	14335	96113.6	15029.5	72638.3	19582.4	10573.4	27988.3	7706.75	9031.81	8743.81	28242.8	444675	1.31945e+06	179530	174213	21928.5	34615.8	173293	79181.8	15105.7	84541.6	8949.4	149505	8908.14	742105	18046	34738.4	11895.3	126703	804450	9390.79	781509	285004	213154	3030.53	4419.92	4537.04	387060	128955	191199	3232.64	17803.3	13189.5	24034.6	9008.82
20	TITLE 12	6.62544e+06	45310.2	313982	15287.4	96492	16155.2	72538.7	20303.9	11194.4	28830.9	8054.52	9473.6	8489.91	26037.5	448123	1.3301e+06	180888	176045	21601.5	33749.7	175902	75918.6	14728.8	84951.8	9114.61	148296	8877.37	744654	18111.2	35071.6	11786	127558	805859	9433.82	784470	290563	212020	4795.04	2872.41	5755.63	390263	120069	192881	3490.34	18443.2	12680.7	24778.4	9014.61
21	TITLE 13	6.65729e+06	42453.4	1.1641e+06	38534.8	212117	78760.9	209400	8933.24	8676.37	178155	100419	38980.6	103717	120483	2.33224e+06	5.15422e+06	122686	501102	646051	66956.2	220828	241987	226145	109331	8363.72	489300	4544.33	1.18084e+06	38336.4	51976.4	13182	239862	2.49704e+06	9413.35	1.1621e+06	986762	16152.8	15134.7	18184.5	52285.8	1.84947e+06	875367	3274.3	8870.2	12134	12693.4	54906.3	5757.53
22	TITLE 13	6.77323e+06	39175.8	1.16343e+06	37414.2	211740	79261.9	208196	11164.3	8471.02	180169	100007	39019.6	103867	122600	2.32426e+06	5.18929e+06	121668	504980	640546	69159.1	223391	242318	229263	113105	8331.96	491267	5180.99	1.18742e+06	40341.2	52387.5	13617.7	243197	2.48888e+06	10208.9	1.16155e+06	1.00736e+06	16945.1	14330.4	18273.8	53391.7	1.86029e+06	872951	2649.57	8985.26	13136	12295	53851.5	6649.53
23	TITLE 14	7.58371e+06	33771.1	662339	35664.8	181532	57828.6	180753	24477.9	13060.9	22429.3	29517.5	2117.08	29097.8	7976.93	1.22613e+06	2.98714e+06	88538.5	818985	348627	33532.1	314371	156615	60732.1	144854	4430.66	246384	3236.46	1.09269e+06	49772.6	62205	20721.2	243117	1.02935e+06	13144.1	1.09852e+06	580110	18293.3	5864.28	6755.97	12978	662725	406124	2137.44	5400.6	15433.4	11170.2	61181.3	10406.5
24	TITLE 14	7.69513e+06	31874.4	656973	34297	181067	58095	179011	23790.5	12735.5	23859.2	29859.4	2343.87	28831.7	9836.7	1.21881e+06	3.00865e+06	86829	821584	348088	33177.9	317408	156337	62607	145247	4937	242602	3438.8	1.09456e+06	50974.1	63076.7	21147.2	244817	1.02611e+06	12752.8	1.09843e+06	592991	17402.1	6964.79	7518.01	13730	667416	400763	2071.39	6608.15	15367.7	10277.9	63140	8339.99
25	TITLE 15	6.30947e+06	39229.7	861390	51322.6	224170	85969.8	224479	19180.5	17135.3	20355	31322.5	10227.3	33681.7	40781.7	1.6823e+06	4.2269e+06	117224	547904	442692	44561.7	249969	70767.2	43157.5	127089	6672.84	319234	6359	983352	38679.2	43579.6	12257.5	255905	2.38518e+06	9090.01	1.00736e+06	818615	12437.8	10909.1	9305.66	16994.4	1.75508e+06	535145	2358.87	3881.67	10460.3	11232.1	68614.8	4199.96
26	TITLE 15	6.41069e+06	38475.6	852945	51617.8	225466	85572.7	223611	19355	17322.3	20167.1	32401.7	9977.54	34297.5	42536.3	1.6696e+06	4.26623e+06	115899	551411	441420	45328.2	253643	73813.6	43567	130170	6113.87	315974	6444.16	988468	38034.9	42608.5	12210.2	257247	2.38249e+06	10448.8	1.01143e+06	839317	12458.2	10965.1	9633.97	17179.3	1.76917e+06	529762	2521.63	3712.37	10807.6	13408.7	68923.7	5476.35
27	TITLE 16	6.54432e+06	50316.3	2.30977e+06	189345	577558	327313	611018	36676.6	8153.19	65494.4	32660.4	4581.24	32970	27930.8	5.07316e+06	1.38882e+07	125167	2.19752e+06	1.31749e+06	535962	757235	535345	538414	358387	16603.3	907127	56920.1	1.58361e+06	126622	55104	49784.4	362361	704781	46286.6	1.57753e+06	2.58386e+06	16548.3	2353.73	5105.98	144767	346779	1.78411e+06	3475.73	13499	13212.9	6293.6	165924	6313.92
28	TITLE 16	6.6618e+06	51021	2.31441e+06	190136	576840	327882	612274	37543.7	10050.4	68273.3	32883.4	4820.94	34476.7	28406.4	5.08907e+06	1.40127e+07	121914	2.21325e+06	1.31994e+06	552223	775747	539244	546049	361140	16458.5	907766	58242	1.59306e+06	129692	55607.2	51360.3	364233	706353	47889.4	1.58052e+06	2.64858e+06	17260	2002.57	4745.15	147597	351822	1.78876e+06	4623.79	15448.7	13225.6	5453.91	167435	7575.91
29	TITLE 17	6.8801e+06	44846	230385	13419.6	79807.1	9981.59	60519.2	19222.1	8705.49	54674	10514	7347.74	10339	24371	471035	3.44719e+06	133627	434065	34731.4	35986.3	240596	97516.3	35177.4	118923	4698.97	93538.8	2638.53	1.11163e+06	26391.5	57977.4	11559	173445	844244	9171.23	1.15731e+06	699278	233645	4779.56	5217.49	6887.85	326110	73462.6	215963	4004.33	28660.1	12980.1	40770.3	15835.6
30	TITLE 17	6.97832e+06	44590.4	227513	13707.7	79096	8763.62	61017.2	19148.6	10252	55320.7	9997.78	6102.77	9740.38	23986.6	467904	3.46989e+06	134851	435614	40281.7	36264.6	243519	97270.7	35069.2	118721	5320.04	92546.3	3156.17	1.11568e+06	26168.8	57645.2	11120	173919	847040	10513.8	1.15973e+06	713845	233883	5944.56	5509.39	7473.98	328060	71516.6	216589	4046.39	29432.7	12329.5	40645.4	15240.6
31	TITLE 18	7.6818e+06	31377.2	377789	13333.4	95002.2	16616.9	74866.6	12068.4	6516.38	55074.9	11661	4954.29	11339.6	19992.6	652476	2.06364e+06	110352	301037	149488	45398.2	174374	43829	49460.8	85735.1	3594.32	130613	2926.33	1.16522e+06	22909.1	76373.6	10588.9	117520	738297	9061.84	1.19251e+06	396918	216913	3017.8	3423.77	6056.77	329139	182170	198501	3397.49	15768.8	10776	44820.8	7727.45
32	TITLE 18	7.77974e+06	32005.6	374755	13490.8	92792.6	14421.9	75892.4	12260.2	5592.32	55445	13317.6	4063.62	10818	20108.9	651983	2.07798e+06	109408	302593	151124	46307.2	177872	43169.6	49646.4	87121.1	3775.64	132276	2956.15	1.16908e+06	56772.3	75462.6	9434.16	119271	737618	9502.63	1.19615e+06	404236	217851	4682.35	3782.82	5143.96	331434	181182	198412	3863.35	15952.3	12160.7	44828.3	10277.9
33	TITLE 19	7.49625e+06	56728.6	345414	16906.1	139572	35158.6	112576	15440.3	7335.25	69662.9	19983.6	5309.44	20802.9	13768.8	581678	1.29619e+06	164247	225814	48864.5	40291.4	321042	140984	25630.4	136875	5057.88	116754	58659.6	1.17837e+06	25612.4	61328.2	11303.7	121303	632097	49731.2	1.20667e+06	280467	186187	3903.36	3776.63	5604.56	194465	118765	167000	3733.5	10015.3	11479	41182.1	5659.56
34	TITLE 19	7.61887e+06	56853.3	343973	17048.1	137750	34696	114815	13460.1	9368.6	70093.2	20866.5	5276.87	20667.6	19218.7	585961	1.30464e+06	167482	227433	49273.9	40547.1	327477	141659	24622.3	135821	6259.34	113638	56537.2	1.18087e+06	24543.4	60855.7	12212.1	122093	634992	50706.2	1.20985e+06	282691	186536	3927.69	3421.34	5401.61	196654	120097	168714	3209.04	9633.45	13884.2	41777.9	5424.24
35	TITLE 20	6.56911e+06	62644	462158	25813.5	188367	33117.7	156411	18511.1	13668.9	72822.9	21868.5	12103.2	21901.7	46306.8	583511	287431	222405	140168	59892.7	31299.7	330989	200870	18764.6	140844	14024.4	137899	40023.3	1.17128e+06	22497.3	64251.5	11479.6	109726	581679	33891	1.20428e+06	84886.4	223145	2314.09	2128.61	3515.05	141237	155611	202576	2919.3	6917.99	15309	29355.9	3202.81
36	TITLE 20	6.66331e+06	64958.8	465625	25671.1	187895	32159.5	156661	16834.9	14308.4	74688.7	22661.9	12596	23104.6	48661.7	589273	290232	223678	138807	59997.7	31968.7	335663	200263	18573.4	142243	15266.4	135349	40167.6	1.17548e+06	23752.4	64203.9	10595	110481	584429	34366.7	1.2066e+06	86684.2	222485	4173.5	2912.48	3546.58	143025	157434	202789	2878.32	6459.94	15603.4	29543	3351.87
37	TITLE 21	7.36311e+06	74748	586875	16544.6	149560	44372.4	125801	17838.6	11908.1	79208.7	9356.71	2652.66	8051.91	15937.2	866467	393538	138932	227726	73181.4	28695.3	388559	270661	10519.9	174123	14337.1	135990	13373.2	970737	22897.4	43570.5	10713.3	144880	553306	25107.8	1.00994e+06	108948	168457	4683.71	2715.39	6441.65	195510	215946	153191	3138.8	6907.55	11661.7	29770.1	3654.98
38	TITLE 21	7.48977e+06	74545.6	591296	16532.5	147742	42987.3	127500	17647.3	9991.27	79718.2	9456.06	2855.22	8313.5	17118.8	868614	396978	139742	229090	74364.2	30156.8	395720	272146	10684.4	174423	13739.1	138762	12903	978185	23561.3	43297.4	10427.3	147053	555970	25689.7	1.01609e+06	110712	169234	5337.24	3849.6	4176.34	196259	214057	153632	2655.98	5723.66	11516.1	29385.8	2909.08
39	TITLE 22	6.84857e+06	56076	319832	15643.5	81067.4	17022.1	50089.6	23981.3	11113.2	148850	19077.3	9080.5	19365.4	33454.9	648922	1.17615e+06	198635	205408	44488.9	28946.2	191334	116954	16661.1	94415.6	6548.42	135889	4475.9	1.24233e+06	16669.5	48491.8	7421.05	161550	1.08875e+06	7376.57	1.27923e+06	259755	220838	6719.09	4091.4	6669.45	601622	105031	195016	4229.49	26217.9	13629.6	40685.7	14306.5
40	TITLE 22	6.96807e+06	55293.5	321731	16657	82180.2	17326.7	50201.3	24970.7	12072.3	149566	19477.7	9032.98	18617.9	35342.9	649484	1.18691e+06	200043	207261	48878.2	30880.1	194668	116185	17910.8	96998.5	7642.89	133654	4713.04	1.24772e+06	17146.1	46948.6	9226.38	161173	1.09048e+06	7484.09	1.28019e+06	265747	219735	5144.36	5032.52	7951.93	607276	103894	197107	4030.18	26519	12906.8	40636.1	12950
41	TITLE 23	6.21353e+06	56865.2	399004	17808.4	111573	29875.6	80359.2	12967.6	8056.26	69672.1	22474	6482.67	23380.5	31765.2	449089	193833	194169	94372.6	48453	29568	272312	189173	8620.56	117702	13803.7	133297	9323.52	895341	15849.3	62295.5	9171.71	89536	414722	11971.1	936221	66146.1	190457	3414.1	3142.92	4328.44	54124.8	132030	173733	2853.65	3940.3	12650.1	19451.4	3213.44
42	TITLE 23	6.3006e+06	56721.4	396024	17166.1	114369	29566.4	82195.6	13344.1	8836.98	71518.9	23881.9	6968.28	24457.2	33320.1	447852	194368	194324	94146.9	49330.7	30663.1	276972	191100	8665.51	119655	12306.9	134307	9726.9	898718	16731	62628.1	9774.47	92641.1	411973	12298.4	939742	67917.5	192824	2979.38	2311.61	3423.8	55442.9	134229	174615	2211.5	5311.73	15536.5	18812.8	3218.67
43	TITLE 24	6.6441e+06	67666	525267	14949.5	141618	29043.2	113864	16335.4	9137.94	76609	14820.4	19732.9	15931.1	64383.5	873743	396709	168411	170448	89524.5	29236.7	414848	295812	6188.65	182343	11859.4	128927	26936.1	1.09227e+06	23376.4	51481.7	10706.4	178180	552690	20211.1	1.15977e+06	107374	159982	4513.15	2276.12	5385.76	175365	225686	156004	3553.72	10304.3	12960.8	18325.4	6236.05
44	TITLE 24	6.92678e+06	68962	528573	15820.1	143851	30123.2	116983	18098	8199.04	82454.3	15955.2	21898	14561.1	67831.4	875827	414405	170167	175487	90235.3	31462.8	438067	307342	8331.02	191053	12363.3	129833	27299.5	1.13342e+06	25822.4	55087.6	11428.5	184648	566990	20203.5	1.18338e+06	113119	168352	3984.74	2835.11	5605.33	180380	226402	158938	2860.76	11561.2	13369.1	20552.3	6819.49
45	TITLE 25	6.0576e+06	55236.8	347632	25052.5	139276	32181.2	110473	29054.4	17412.8	48749.8	14986	41994.6	14349	119608	694852	1.15289e+06	215079	302553	51445.8	37677.6	314054	46692.1	14193.5	147835	10806.9	149133	2907.54	940395	25354.9	46838.5	14926.5	182232	925895	7767.53	971498	261319	236226	3943.88	3178.36	6010.48	427551	107929	208409	4302.17	25537.7	14810.3	50690.8	12438.6
46	TITLE 25	6.14677e+06	55441.1	349261	24654.5	136775	34019.8	109182	27511.8	18424.5	48197.9	14871.2	42494.7	14957.8	121375	700655	1.16528e+06	217449	302041	51257.3	38818.4	319724	48125.1	14046	146496	11533.4	149514	1207.4	942768	25128.1	46947.7	14750.5	182300	928663	7298.68	974497	266545	235838	3635.89	3394.67	6831.85	431031	107817	209245	3303.12	25519.5	12191.4	50002.7	13555.1
47	TITLE 26	6.81936e+06	77271	535809	19459	167129	40215.2	140551	16149.1	11352.8	55005.3	37483.5	8494.6	40767.1	36717.9	875013	963424	190378	214835	80062.1	38795.7	386047	207643	18085.9	162025	10323.1	133920	42811.1	905486	22960.5	50838.9	11778.3	148078	653335	43917.2	947801	216404	234818	4502.1	3629.95	5580.16	158795	177992	214233	3075.47	13894	14284	25729.8	5827.34
48	TITLE 26	6.9353e+06	77659	533273	18189.4	167436	41177	141925	17718	11909.8	56155	38823.7	9382.87	40418.3	37557.3	879084	972084	189142	214202	79648.6	40289.9	392497	208232	18436.8	164401	10192.4	136370	44083.3	911490	22405.9	52901.1	12354.2	148857	657016	43939.3	950137	221218	233250	3645.94	4142.28	6639.15	159571	172906	213318	4403.56	12951.9	15771.1	27266.3	7234.57
49	TITLE 27	6.71139e+06	71411.4	550659	19838.9	183774	43419.3	157428	26437.9	14203.6	33649.8	12120.2	4173.75	12873.6	23296.1	874395	706850	167211	228906	84947.9	27096.3	427746	205298	12819.7	189328	14368.4	142127	4415.98	1.02391e+06	25119.5	50038.8	10586.9	187582	620414	25178.5	1.05512e+06	169207	187041	5388.52	3651.76	5420.68	221436	234578	170786	4203.16	13314	12270.8	28634.8	8772.86
50	TITLE 27	6.81519e+06	69806.9	551171	18323.9	181970	42668.6	157937	26889.4	14173.4	33953.7	12273.7	4815.96	12060.5	22454.7	874531	712878	164943	228804	84593.4	27952.5	435774	207336	14508.4	190379	12087.7	143946	5566.94	1.02719e+06	23444.1	50650.5	10294.8	189764	622585	26160.2	1.05685e+06	172181	189056	3511.22	4103.39	4906.23	223777	237379	169747	2533.88	14029.8	14221.7	27730	8286.1
51	TITLE 28	6.62961e+06	56285.9	322441	24491.6	125786	24815.9	95108.4	43988.5	36362.5	45333.9	16663.6	4517.6	17690.8	21612.3	541167	5.43789e+06	257874	403524	53937.8	57643.8	313378	167416	107974	166260	13603.3	143317	3080.94	1.17385e+06	34622.1	33616	11787.2	342080	3.6479e+06	2362.75	1.21394e+06	1.10689e+06	286120	16397.9	9321.04	15950.7	2.63156e+06	97393.7	260506	19934.5	49362	21565.2	64200.3	24600.5
52	TITLE 28	6.73456e+06	57873.4	322464	24386.1	128710	23530	94318.6	45613.2	38264.5	44134	17399.7	5784.6	17359.6	23627.3	542446	5.49504e+06	257856	406290	53036.7	59174.6	319163	167563	109088	164519	15407	145881	3503.03	1.18101e+06	36523	36149.2	13623	342575	3.64694e+06	1745.32	1.2157e+06	1.13144e+06	288202	17149.3	10646.1	12253.8	2.64955e+06	94438.2	260824	20266.5	51404.7	19239.9	65187.3	25286.6
53	TITLE 29	6.71991e+06	47052.8	816424	24033.3	180947	49272.9	169480	22604.1	11016.9	34629.4	22728.7	11753.8	24049.6	42131.9	1.41261e+06	2.58506e+06	146454	520448	256637	40684.1	423591	111054	40964.9	181715	9162.93	240959	64338.8	1.08757e+06	45115.9	41770.4	20298.3	262373	792681	58630.6	1.1266e+06	515925	217409	4367.22	5069.19	22310.6	250684	436475	204238	4324.2	15845.4	12965	52671.5	8793.52
54	TITLE 29	6.81142e+06	49147.9	807295	23979.7	179885	48348.5	167713	23425.1	11792.6	35426.6	22706.8	11966.6	22693.1	44841.7	1.39348e+06	2.59838e+06	147103	521845	257580	40729.1	429184	111902	42337.3	182480	8399.48	235730	64850.2	1.08897e+06	43603.5	43267.7	19876.2	262657	794174	57855	1.12571e+06	527114	216021	4595.89	3690.52	20564.6	253008	431311	203593	3609.77	15922.2	13023.6	54054.6	8828.06
55	TITLE 30	6.84161e+06	72877.1	536597	21544.3	165858	43220.9	146452	16380.4	10098	114511	73484	3401.8	78062.7	23881.4	833585	1.5185e+06	185660	261048	81944.5	31979.2	373192	133025	36235.7	159685	8819.27	137818	26404.8	1.07428e+06	28322.1	37848.1	15007.4	158205	564653	25576.6	1.11587e+06	324066	205676	3521.67	3178.39	4487.33	115105	224645	191764	3052.66	14902.2	17807.8	45704.2	7829.92
56	TITLE 30	6.94797e+06	73652.4	537627	23171.2	165649	42671.5	145988	15075.5	10421.5	115890	75875.4	3101.58	78816.1	23963.1	835202	1.53403e+06	185761	262911	77790.7	33233.6	381306	133693	36802.7	158170	9177.52	139379	27600.8	1.0783e+06	28140.8	38081.9	14388.2	158031	566545	26959.5	1.11908e+06	330487	203755	3257.7	2861.66	4350.25	114725	222612	192392	3556.8	16102.6	13515.7	44630.2	7064.36
57	TITLE 31	6.67827e+06	43414	839977	29544.6	212284	64260	199472	20362.2	16348.9	38175.7	25347.2	3491.5	26130.8	20564.5	1.59554e+06	2.24551e+06	160330	586278	418688	37668.1	305938	529920	47517.9	148012	20409.5	356491	12200.4	1.13388e+06	33449.5	36429.7	16926.2	152032	488190	17944.3	1.131e+06	452851	10545.7	2842.56	6154.01	46267.9	127339	598734	2809.68	5475.35	6255.52	15997.9	34537.9	3864.07
58	TITLE 31	6.80415e+06	45620.9	845750	28941.6	213867	65930.3	198184	19932.7	15523.8	38722.9	27227.4	4301.49	26643.8	21583.6	1.58849e+06	2.26929e+06	159509	592543	419090	39825.5	311635	532545	45884.4	147759	21329.5	356534	12244.6	1.14389e+06	33827.7	38017.1	17071.5	155213	489234	18640	1.1368e+06	462440	12429.7	2214.98	5343.46	46454.5	129470	602191	3167.85	5630.76	10354.3	14821.3	33584.4	2695.72
59	TITLE 32	6.73209e+06	41663.5	1.61481e+06	46869.7	241980	96609.2	228341	25528.8	14555.6	93110.6	83181.9	121952	86984.7	333703	3.32369e+06	6.98697e+06	157595	744485	947999	100809	255127	332100	190779	140359	17240.2	631676	13578.4	1.03414e+06	41287.3	25423.9	21067.7	326778	2.73215e+06	13496.4	1.01519e+06	1.33071e+06	15042.3	14263.9	17308.2	77403.6	1.95917e+06	1.20661e+06	2048.41	10893.8	10708.5	14086.8	54671.5	5275.26
60	TITLE 32	6.84713e+06	42144.7	1.61665e+06	46116	243026	96135.8	227994	25518.9	13855.1	93261.6	84496.3	125464	91040.9	342832	3.31297e+06	7.04633e+06	158664	749005	947074	102158	259805	333039	194554	142649	16066.4	630518	13564.9	1.04052e+06	42376.1	25792.2	19978.3	331569	2.73368e+06	13733	1.01896e+06	1.35906e+06	12919.3	13821.6	18126.2	79721.8	1.97585e+06	1.20554e+06	3190.53	11844.6	9284.1	13378.4	56622.2	5038.73
61	TITLE 33	6.44583e+06	49798.4	1.49034e+06	26900.8	218683	75615.6	194772	15206.7	12191.7	59112.2	25784.3	2011.21	26668.9	19315.8	3.06965e+06	971111	158190	500811	818178	39963.2	262481	376904	27078.1	134804	17587.9	614877	13006	1.60042e+06	36295	52981.7	14883.3	155061	609497	22363.8	1.59512e+06	211346	11577.4	5247.41	8964.32	83626.6	236499	1.12955e+06	3133.37	4017.72	6467.35	14432.9	44297.5	3656.06
62	TITLE 33	6.55146e+06	51940.2	1.49427e+06	27580.6	215752	77000	193763	16712.4	11926.4	57591.9	26476.4	1904.02	28083.2	20088.1	3.07904e+06	981296	160305	503869	816812	40144.2	267063	378080	28739.3	136051	18979.8	616212	13657.9	1.60848e+06	35455.6	53821.6	15992.5	155646	611718	22393.2	1.59824e+06	216295	10629	5941.83	10343.3	86395	239193	1.12854e+06	3188.62	4336.23	9219.19	14010.9	44570.3	3787.29
63	TITLE 34	6.82192e+06	37742.9	898661	20012.5	161625	34254.1	148382	14585.7	12070.5	79339.6	32466.6	7628.58	31418.6	30166.4	1.86024e+06	1.69371e+06	117242	645527	508285	39003.5	258945	120686	22254.4	122482	4832.92	301479	9091.52	997928	37929.1	31866.9	13443.9	167199	2.84646e+06	14480	1.00424e+06	344403	10833.3	14314.6	17761.3	17710	2.09624e+06	585270	2718.54	3119	15263.9	12408.3	58486.2	7699.07
64	TITLE 34	6.9502e+06	36308.3	893990	19892.9	161487	34792	146221	14697.2	11716.9	80534.8	32680.1	8602.64	31314	32178.5	1.85557e+06	1.71307e+06	116616	649037	507429	38604.1	263722	122048	22259.8	124023	6182.61	301320	9758.56	999075	39285.2	31869.9	14012.6	170412	2.8448e+06	15290.3	1.00607e+06	351434	12319.3	16567.8	19606.7	17562.7	2.11563e+06	582124	3074.9	2475.27	14292.4	12816.2	59362.8	8729.97
65	TITLE 35	6.72459e+06	50270.7	714421	24232.6	151595	32083.9	131223	21312.4	18025	22609.7	42395.4	3437.12	42630.6	17690.4	1.22419e+06	7.96307e+06	187114	533174	278136	42688	209117	164804	70194.6	121959	9603.48	257926	9435.82	1.08443e+06	37005.7	32399.3	11815.7	218627	2.62871e+06	8262.31	1.08614e+06	1.51262e+06	12407.3	15075.1	15087.8	13491.6	1.89053e+06	402704	3013.43	7918.06	10452.4	17094.7	45488.4	6194.55
66	TITLE 35	6.86933e+06	52329	709042	24977.3	151488	31680.6	131992	20362.1	17564.1	22210.9	41167.8	2659.69	43208.2	19706.5	1.22145e+06	8.06115e+06	187762	539040	278369	44165.7	211792	163346	71573.7	121512	11264.1	260456	9218.74	1.09264e+06	37015.5	34103.7	11698.3	219002	2.6317e+06	8882.05	1.09353e+06	1.55148e+06	9175.06	15794.9	13107.2	15083.1	1.91071e+06	402432	1920.82	7812.87	11177.6	13806.6	45561.7	5305.3
67	TITLE 36	8.00338e+06	28914.3	938778	33362.8	163391	53186.9	158814	33402	12351.9	30111.3	28960.2	13281.4	29412	43213.5	1.80063e+06	8.57151e+06	100337	778000	517738	44128	266206	187526	79651.1	139708	4920.93	314015	15081.9	915592	48630.9	25627.1	16122.7	262664	2.51689e+06	10217.9	916308	1.60421e+06	9407.05	11997.1	15881	20016.2	1.81052e+06	591077	1828.9	7865.33	11508.5	12886.9	53064.9	5968.34
68	TITLE 36	8.14555e+06	28531.8	936715	32584.3	164484	53821.3	158387	31900.9	12807.7	29593.6	29730.4	12843.1	30203.8	46030.4	1.79397e+06	8.67204e+06	102322	783699	517596	45675	270413	187832	79585.7	141312	5484.76	311816	16468.3	918938	48950.7	25738.7	16411.9	265999	2.5164e+06	10628.6	922330	1.64778e+06	13277.2	11118.8	14815.8	19688	1.82844e+06	590798	2498.78	6278.41	12962	11960.2	53183.7	6076.11
69	TITLE 37	7.15651e+06	43031.6	936007	18402.4	133419	30187.9	119014	25666.8	12217.9	57648.6	55202.7	3236.73	55100.4	9477.35	1.87116e+06	1.93912e+06	120766	470401	477084	33281.8	240936	126625	17363.5	114952	5522.22	325436	8481.61	818374	31999.2	20912.8	11418.7	185127	2.33102e+06	10648	815340	378931	13053.6	12776.4	16109.7	24869.7	1.69044e+06	587622	3146.46	3612.63	13221.7	12781.3	48941.7	6953.86
70	TITLE 37	7.27901e+06	45184.4	928825	16101.6	131088	29890.9	120601	24858.2	12059	57821.6	55218.9	3900.93	55848.7	10684.9	1.84331e+06	1.94985e+06	120910	471499	474046	31497.4	244851	125041	18601.7	116864	5824	322123	7973.79	821195	31000.4	20735.5	11258.6	183760	2.3324e+06	10468.5	818062	385951	13580.3	11579.8	16596.4	21866.9	1.70053e+06	584465	2426.29	3560.2	13733.6	11356.8	48886.1	7229.5
71	TITLE 38	7.06539e+06	45134.8	384968	22284.5	112012	16726.2	94150.3	32798.4	13815.6	95445.1	38733	18711.7	40030.1	62968.4	577392	7.61411e+06	179744	549708	55738.2	42322.8	240559	74156.9	53871.9	125677	5802.01	126187	6917.23	1.39721e+06	35898.1	47745.2	11330.3	261049	4.44589e+06	7875.35	1.42674e+06	1.54624e+06	248485	23754.8	25434.6	19415.5	3.29886e+06	118582	224814	4950.09	31463.5	17272.9	62255.9	15669.6
72	TITLE 38	7.16361e+06	45455.5	384701	20607.9	110634	16495.5	93734.9	33172.6	13080.3	96412.3	40130.7	19256.4	41795.5	64867.9	579121	7.67904e+06	178623	553592	54182.9	43082.2	244351	72970.4	53540.2	124558	5659.11	123842	8058.53	1.40266e+06	36239	47701.9	11649.5	266399	4.4373e+06	3287.03	1.4297e+06	1.5792e+06	250780	25451.9	25533	20512.4	3.32068e+06	116964	224200	5358.97	32044.8	15507.6	62456.3	16841.7
73	TITLE 39	6.91369e+06	77121.6	496780	17112.6	127153	21239.4	99135.5	19513.8	10589.5	51898.7	54870.8	8197.73	57332.7	37323.3	881661	933584	221246	197749	67597.2	28473	291554	414736	11855.3	132280	15395.7	171665	46597	1.43319e+06	23326.5	50105.4	16167.4	149542	658047	32987.4	1.48542e+06	213200	257238	4879.46	4398.39	7513.37	162582	163943	236876	3950.65	9091.57	14753.3	27563.1	6310.76
74	TITLE 39	7.01644e+06	77019.6	495076	18642	128948	21251.4	99628.1	19893.6	10951.5	52185.6	56283.2	9744.57	56181.3	38904.6	884902	943558	221967	197367	67233.9	29408	297598	416326	12374.6	133224	15769.5	174825	46001.7	1.44085e+06	22581.1	50892.8	16538.1	151194	660886	32285.2	1.4903e+06	216658	257338	4670.15	4790.98	4563.69	162480	162095	236608	3380.45	10478.6	16530.1	28666.8	5402.22
75	TITLE 40	6.49446e+06	101092	757218	26519.1	158598	31077.5	126750	26279	13617.6	24682.7	57825.7	8325.22	61293	36311.4	1.24763e+06	784404	286562	274764	113120	32256.2	408762	397749	10032	180252	11058.2	230916	63983.1	811693	21719.7	15949.2	12925.8	187824	768011	48260.8	870512	190722	246916	7277.68	4386.85	6716.57	237665	296583	225629	2779	6477.89	21472.9	18189	5277.09
76	TITLE 40	6.58462e+06	97300.1	758935	26431.6	156775	33123.8	126229	25400.9	13141.9	25533.7	59898.1	9251.37	62663.2	36783	1.25168e+06	791557	284970	274184	112987	33163.8	415860	398132	9384.41	179126	11383.9	230176	65671.8	813817	23525.2	16113	12580	191807	767208	48951.1	871605	196401	246252	7093.3	5341.81	5049.06	238979	298359	226628	3367.09	6931.93	19025.2	18437	4412.48
77	TITLE 41	6.97052e+06	66887.6	486637	27822.8	203456	56761.9	187455	19733.1	18032.1	25078.9	59042.8	7362.41	62584.9	30953.9	742168	1.54043e+06	214054	410380	70789.3	28483.9	463571	200322	13246	196278	12784.7	159743	138005	1.03721e+06	41580.6	26030.6	22370.3	255577	766521	111652	1.07716e+06	340125	215095	4892.21	3729.34	5178.71	214275	180136	199732	2521.47	10789.1	15945	47677.3	6657.25
78	TITLE 41	7.08384e+06	66432.2	489289	27379.9	205395	55642.3	186683	21448.1	18973.7	24533	61208.1	7754.62	63213.2	31984.2	747129	1.55505e+06	214241	414120	72327.3	30858.9	472188	200571	12924.7	199099	13120	159454	141366	1.04331e+06	43896.4	27204.5	21577.7	256625	770139	112560	1.07858e+06	346252	214720	4343.87	4155.42	5925.63	217630	183442	200245	2996.72	11575.7	14861.5	48205.8	6667.27
79	TITLE 42	6.86862e+06	61495	372361	28614.9	170029	44335.1	164241	20755.6	16786.7	28748.7	20976.6	3364.21	22854.9	12004.1	617094	4.28626e+06	176790	339644	52984.9	34241.8	299172	144517	40947	130209	6903.78	128713	49623.5	1.0373e+06	35277.9	25234.4	19096.2	152404	605383	49628.6	1.08911e+06	872051	218479	2263.3	2782.86	4906.39	92514	122254	205624	4753.12	6933.15	13167.8	42417.9	5280.88
80	TITLE 42	6.96988e+06	61774	375282	29167.1	171266	44217.9	163000	22461.7	15567.8	28088.4	22212.8	4639.09	23541.9	11815	617232	4.32337e+06	176862	341279	51309.1	34512.7	303394	144654	41670.4	133682	4641.73	128892	50610.8	1.04118e+06	35271.8	25908.9	18503.6	151396	606813	49202.3	1.09087e+06	890660	216919	2389.34	2321.71	4529.14	91209.5	124696	204994	5420.55	6987.35	14247.2	44236.3	4103.59
81	TITLE 43	6.89289e+06	94431.2	644826	21869.1	158641	26531.8	115488	25443.9	13007.3	54178.4	17969	9408.12	18635.5	31815.4	983439	646973	277543	265388	98242.6	26612.1	481401	433538	12621.3	208196	17808.1	193443	50381.3	1.10708e+06	26724.2	28581.5	14440.3	175017	693811	35288.9	1.15234e+06	164106	238854	3787.01	4330.66	5722.27	186307	256835	215559	3565.74	9863.83	17350.5	19423.7	5436.21
82	TITLE 43	6.97824e+06	94109.8	649408	20953.6	158771	28376.5	114918	25687.4	10280.3	55045.7	18667.4	8979.45	18716	32606	981879	651090	275793	267145	96103.2	27883.7	488546	435455	13531	208823	17181.1	193142	50914	1.10577e+06	26657.9	29237.6	15747.2	175068	696474	35392.4	1.15488e+06	166207	239857	5418.84	2767.27	5428.88	185714	257638	216471	3461.65	10701.8	16833	19867.4	5819.17
83	TITLE 44	6.84182e+06	52741.3	268846	18436.8	77943.5	15322.6	58933.5	24893.9	17043.3	49047.8	10842.4	24273	11347.8	72510	622732	1.46246e+06	234018	189626	42224.4	29659.3	159115	62140.6	16110.7	84977.6	10991.8	106210	5280.39	1.09858e+06	24205.4	29083.7	12276.7	171211	2.14727e+06	7439.23	1.12696e+06	321928	277120	9594.8	12524.6	11133.5	1.43713e+06	86126.2	249462	4172.28	30997.4	16410.5	39077.9	16991
84	TITLE 44	6.96877e+06	52958.3	271580	18042.1	79240.1	16509.7	59818.5	25724.5	16044.6	49533.1	10483.6	24751.9	10979.3	73822.9	628271	1.48067e+06	236806	190263	41994.7	30750.3	162304	61619.8	16569	84117.8	8672.91	107342	5936.31	1.10225e+06	24405	28553.2	11763.7	172592	2.15042e+06	7443.64	1.13387e+06	330563	274924	10798.5	12335.6	11577.8	1.4508e+06	87322.6	249433	4530.85	32691.4	16653.3	38577.7	17879.4
85	TITLE 45	6.92187e+06	78224	567063	25747.9	167767	33610	130710	27629.7	17896.1	46138.3	18591	3430.2	17827.4	21379.7	972346	918993	231744	259074	83211.2	27515.9	382666	373949	18892.7	172762	15956.5	150273	87009	1.27738e+06	28053	58640	15628.1	191022	841837	65591.4	1.31803e+06	216990	252181	6115.12	4703.06	7278.24	286596	219725	231939	4709.35	5854.22	16162.3	28701.7	3568.23
86	TITLE 45	7.01381e+06	78339.3	566716	24860.4	166398	34772.9	131683	28294.8	16806.4	47621.2	18176.6	3902.6	17696	20960.4	970963	926347	234878	257197	84588.3	27367.6	388607	374896	19241.4	172617	16562.6	151203	85819	1.27813e+06	27410.6	58456.3	15697.9	189766	843347	67914.6	1.31888e+06	220658	253823	5941.06	5049.16	5728.28	288079	219777	233090	4167.02	5593.61	16342.5	29009.8	2869.41
87	TITLE 46	7.04764e+06	58413.5	349618	17091.8	85285.4	26720.8	56499.2	25152.8	12571	39301.1	21159.6	11414.1	21710.4	39863.7	660849	2.01707e+06	243660	189701	50493.7	25313	186342	191571	27229.9	97414.1	12412	159379	8645.76	1.01414e+06	22107.1	28525.4	11056.5	184526	1.59261e+06	6746.09	1.06376e+06	428879	245244	8599.98	10648.5	7779.35	932187	112246	217971	5394.75	31568	15959.6	42500.8	16074
88	TITLE 46	7.16444e+06	60663	352295	18507.7	83857.7	28304.8	57107.7	25931.4	11010	41003.5	22794.3	11424.4	23165.5	39248.6	659122	2.04137e+06	245180	191414	50820.2	25924.6	190034	192544	28036.4	96236.9	11193.8	159375	9591.11	1.01905e+06	21324.6	27865.5	11282.6	186950	1.59228e+06	6437.52	1.06629e+06	438132	245194	8284.9	9739.3	7956.62	939380	116545	219513	5680.77	31806.2	16080.5	42435.8	16485.5
89	TITLE 47	7.12862e+06	81234.3	561111	21090	160890	30209.8	129473	22750.7	13521.5	674186	12984.2	3992.27	12762.6	21526.2	914799	534217	234567	223585	78471.6	24594.1	395961	266107	17742	170176	15844	161404	45102.6	1.01406e+06	26115.5	27318.5	14944.1	187403	635531	34533.6	1.05284e+06	133052	210530	5453.36	2681.85	5657.68	173669	233585	192784	4407.28	8917.55	15209.3	21840.2	6560.38
90	TITLE 47	7.25404e+06	82583.6	566103	21114.4	162570	30143.3	130708	20333.6	16429.2	679490	12887.5	5176.65	11971.6	18227.7	920212	536643	236370	226501	78899.2	25962	402077	265332	17513	173076	15550.3	164082	44303.5	1.02127e+06	24885.4	27596.1	14743.2	186374	637962	34249.9	1.05654e+06	136103	210473	4192.55	5165.89	4978.57	174685	235379	192860	3565.23	8128.14	13764.1	23023.2	4074.48
91	TITLE 48	7.1886e+06	53170.7	382834	15325.5	72198.4	19098.8	42052.5	27641.1	9817.57	137850	35665.4	16067.1	36066.4	51302.6	565896	1.4103e+06	219774	182942	49761	31054.8	148153	229341	17912	82787.6	10832.7	152609	10176.2	1.06737e+06	23764.3	22712.6	9440.24	259353	2.36804e+06	6680.42	1.11007e+06	310914	234511	14042.1	13774.2	10766.4	1.59937e+06	134229	210648	4041.43	28567.4	15737.7	41668.6	15004.8
92	TITLE 48	7.30684e+06	57362.1	384165	15553.9	72065.6	18454.2	41002.9	25364.2	10884.6	138677	34743.6	15356.6	36861.5	51123.3	563948	1.42272e+06	219248	184544	47571.8	32673.9	151296	229865	17303.1	83697.5	10471.3	156262	8922.42	1.07162e+06	24273.9	25283.3	10888.4	259161	2.36752e+06	5929.02	1.1102e+06	317112	233421	16055.8	15298.7	14019.8	1.60998e+06	130616	208942	3847.47	30046.2	15900.7	42465.8	14262.1
93	TITLE P1	6.62346e+06	45447.5	562556	71638.3	259757	114994	264030	22675.6	8913.64	71687.5	27940.2	6720.12	28438.9	32254.1	1.00479e+06	5.37762e+06	146383	818543	166935	176689	380162	195174	225122	178378	10634.4	197372	20511.9	1.18519e+06	50007.3	46669.2	18990	282901	1.76475e+06	21512	1.20715e+06	1.00783e+06	103584	7810.9	9112.88	10594.2	1.19318e+06	305868	94104.3	6846.51	15206	14660.8	79558.4	7341.42
94	TITLE P1	6.72049e+06	47290	552055	71556.6	259959	112233	264058	25022.2	11679.3	73166.2	27865.6	7243.47	27951.1	33638.4	979643	5.42054e+06	144486	822374	163647	182829	384546	197247	227520	178910	11435.5	193687	21076.4	1.18815e+06	51534.2	48146.1	18231.8	282338	1.76282e+06	21498.8	1.21047e+06	1.03094e+06	102615	8508.65	8797.09	10878.7	1.2028e+06	297319	95087.7	7897.92	15362.4	14182.1	82229.9	7006.3
95	TITLE P2	6.4342e+06	47959.3	563530	71289.8	261280	112839	261799	23192.3	9583.58	71777.2	25400.1	7251.7	26108.5	32380.7	987639	5.33157e+06	148666	816981	164445	174684	376162	197000	221636	178622	11389.1	199063	19526	1.18401e+06	51394.7	47732.9	18817.3	285649	1.77123e+06	20252.9	1.21389e+06	1.00414e+06	103319	8420.63	8450.96	10016.8	1.1994e+06	303219	94153.1	7684.39	14362.3	13411.2	81606.4	10027.1
96	TITLE P2	6.57076e+06	45403.4	554801	71007.9	257034	112401	263396	22707.4	11064.6	73322.5	27500.4	6652.57	26694.8	33281.4	967580	5.40589e+06	144961	823144	158318	181343	381835	196936	225989	177280	9995.24	193272	19797.5	1.18916e+06	50297	46647.4	19194.7	285258	1.77171e+06	19733.7	1.21792e+06	1.03002e+06	104638	7895.74	8038.96	8451.88	1.20941e+06	297580	94610	6741.65	13760.1	14148.5	81907.1	7781.57
97	TITLE p3	6.5068e+06	48365.6	560149	71180.5	260344	112856	265488	22138.1	12554.8	73631.5	26574.2	6734.9	27691.8	33899.6	972794	5.38607e+06	150564	824013	157534	176775	379018	199496	225580	176847	10962.5	193721	19450.5	1.19257e+06	49330.9	47647.1	19179.5	287696	1.79307e+06	20809.6	1.22392e+06	1.01393e+06	105083	8462.94	8643.22	10407.7	1.20977e+06	296073	95972	5875.67	14846.6	15938.4	82445.4	7611.79
98	TITLE p3	6.61585e+06	43899.7	548846	72958.6	260344	113139	266039	24292.5	11176.9	73539.9	27068.5	6803.36	28059.1	33597.3	952583	5.44484e+06	148593	829356	154542	181286	385402	200338	227795	180644	10345.5	190122	19107.4	1.19849e+06	49864.8	47276.5	20299.9	291698	1.79483e+06	20562.5	1.22943e+06	1.04175e+06	104688	7319.51	9690.87	8671.83	1.2227e+06	288605	96063.7	7322.8	14128.3	14490.3	83517.9	7488.12
99	TITLE p4	6.66009e+06	46279.7	556709	72638.8	264183	115169	267980	24068.6	9813.84	74914	27987.4	6953.21	28286.9	33432.8	960869	5.45695e+06	148789	830056	155539	180809	385185	199461	228136	181681	10562.9	192133	21067.2	1.20383e+06	51737.6	47096.5	19065	294714	1.79565e+06	22407.3	1.23022e+06	1.02838e+06	106795	8469.56	9068.79	8594	1.21558e+06	288975	97467.7	7504.59	15479.8	13705.7	81715.1	8445.49
100	TITLE p4	6.78609e+06	47046.9	546116	73687.9	262742	117081	268698	22804.7	10396.5	73888.6	28174.1	7861.03	29058.1	33902.8	942366	5.52212e+06	150029	835450	149292	186907	393782	200252	232298	182752	11038.9	184538	20863.6	1.2108e+06	51173.1	48808.2	19598.4	297484	1.79633e+06	19813.4	1.23519e+06	1.05374e+06	107552	9094.14	9348.21	8247.07	1.2291e+06	282755	97230.1	6057.54	14401.1	14916.8	82429.7	7996.4
101	TITLE p5	7.12024e+06	54073.4	517267	24275.3	153355	38836.8	136990	19822.5	12752.6	60558	36994.5	6621.22	37172.8	24044.7	917332	1.65561e+06	160729	353066	141583	34643.8	288728	233845	32784.8	129469	8156.48	180539	19789	1.04373e+06	27498.1	40351	13681.2	184951	937349	21678.5	1.05675e+06	340026	114521	6558.3	8371.24	7585.18	508362	270972	104778	3878.54	13031.9	14943.5	34698.5	6572.23
102	TITLE p5	7.25116e+06	54127.3	514783	24460.9	152867	38949.1	135222	19677.8	12329	61843.7	36734.5	6643.71	38243.8	25663.2	906270	1.67122e+06	159539	356165	141298	36800.5	294842	233279	32983.1	128356	8786.2	181788	20463.6	1.04595e+06	29744.2	39455.3	12818.1	185265	937863	22753.5	1.05601e+06	345369	115124	6256.63	6720.8	7351.38	511053	264986	105176	3833.43	13225.5	14641.5	35899.4	6415.16
[truncated: 38 more columns]

## Sheet: cleanrawdata
0	intervals_name	TSP	cholesterol	LP (CH3)	leucine	Valine	isoleucine	isobutyric acid	2-oxoisovaleric acid	propylene glycol	2-propanol	ethanol	LP (CH2)	lactate	lysine	alanine	LP (CH2CCO)	acetate	methionine	glutamate	succinate	aspartic acid	LP (C=CCH2C=C)	creatine	myo-Inositol	proline	methanol	glucose	sucrose	β-mannose	α-mannose	LP (CHOCOR)	LP (CH of unsaturated lipids)	fumarate	tyrosine	-methylhistidine	histidine	tyramine	phenylalanine	hypoxanthine	formate	UNK 1	UNK 2	UNK 3	UNK 4	UNK 5	UNK 6	bin-isoleucine-leucine	bin-arginine-lysine
1	TITLE 1	6.60403e+06	45137	539614	24159.2	154516	50158	13758.5	10020.3	28095	37923.7	2471.57	1.0159e+06	1.94001e+06	132352	512418	204326	44151.7	219982	57134	57529.3	4664.53	206386	4250.09	1.29902e+06	27333.3	72750.2	1.0004e+06	10458.9	4263.13	5543.05	14502.7	313643	4522.5	16646.9	10225.7	51583.5	15068.5	107606	4780.26	7509.08	6276.98	11001	505978	223608	32168.7	2290.36	1.17321e+07	2.51994e+07
2	TITLE 1	6.72675e+06	44328.9	537145	24277.5	153798	49916.7	12589.9	10390	27668	37446.3	3264.7	1.00991e+06	1.96024e+06	129978	515750	200473	45881.8	222319	57158.1	58275.9	4946.96	202042	3642.81	1.3041e+06	29114.2	71816.1	1.00062e+06	6696.22	4379.01	4370.8	14541.6	312582	4541.74	17340.9	12519.2	52941.8	14213	109075	4058.19	8458.34	6344.44	11312.6	515172	222377	34123.4	2097.78	1.17327e+07	2.51536e+07
3	TITLE 2	6.44872e+06	27726.9	1.17416e+06	195183	546242	309053	29809.3	8499.72	66327.6	25059.6	1412.76	2.5322e+06	1.26951e+07	93989	1.84831e+06	661604	705060	528979	204849	877447	12487.4	477009	17296.1	1.03542e+06	94760.9	26860.7	5.46171e+06	12775	21518.4	24508.2	55478.1	896362	14473.2	13937.6	6540.32	181096	27430.8	357058	45150.6	14200.2	43746.1	14980	1.54366e+06	670826	51489	3313.64	1.71464e+07	2.89521e+07
4	TITLE 2	6.57043e+06	26879.5	1.16513e+06	195351	547228	309542	30556.2	6972.35	66394.8	26181.9	3358.36	2.51126e+06	1.28194e+07	87826.4	1.85713e+06	656227	722678	537848	206705	890217	14709	473169	16515.9	1.03872e+06	100312	27481.3	5.457e+06	11761.4	19086.8	21006.7	48511.8	894553	15477.6	12330.3	5376.26	182086	29556	362831	45605.9	13056.9	43304.5	14335.7	1.56569e+06	674976	51441.2	2340.49	1.71946e+07	2.90028e+07
5	TITLE 3	6.74083e+06	67082.8	729637	27589	217553	65201	12260.4	9230.21	41624.7	20036.3	1994.01	1.21419e+06	948986	192016	433175	199866	34739.1	294811	77506.7	30073.6	10518.7	264772	8340.49	945371	33481.1	33932.1	494644	9668.18	5171.6	5811.29	22441.9	409351	3482.01	6076.23	12527.5	47488.4	25008.2	103705	5732.48	6504.67	3455.04	24462.6	604373	149277	32777.7	3354.48	1.62012e+07	3.59473e+07
6	TITLE 3	6.82379e+06	67154.7	726110	25201.8	216363	64458.1	12377.5	9644.79	42911.1	18526.9	1718.52	1.20771e+06	954498	190664	435386	200983	35479.4	299223	75973.2	30372.5	11521.3	260006	9021.71	949247	30775.1	35116.6	494276	8754.4	5457.96	7247.6	22878.4	406900	1957.12	5099.03	14168.5	48141.1	26080.8	104073	4830.97	7019.46	4047.99	23002.5	612406	149541	33951	3771.48	1.61901e+07	3.59046e+07
7	TITLE 4	6.81647e+06	32362.1	589618	101452	365977	153944	33383.4	12844.1	63077.7	72763	9397.97	1.04878e+06	1.20754e+07	100445	1.46611e+06	256694	268347	457559	96903.9	384595	4045.65	212397	13956	1.04078e+06	79719	27977.5	3.80455e+06	13957.8	18850.6	20851.1	9045.03	372400	13755.3	10530.6	12525.1	136111	18048.6	266107	37575.3	15693	41001.3	31150.7	1.20927e+06	771860	36865.4	1790.93	1.35493e+07	2.69e+07
8	TITLE 4	6.92909e+06	28493.4	572690	101832	364177	153833	32246.7	13561.7	66368.4	72858	8977.02	1.03773e+06	1.21778e+07	96918.2	1.47269e+06	248499	273918	463845	98782.6	387500	3871.22	204275	13765.8	1.04401e+06	82415.6	26813.6	3.80632e+06	11134	20226.1	22887.7	8532.2	357063	13765	11182.4	12585	137984	19556.1	269658	36794.2	16252.1	41896.6	31897.3	1.21944e+06	779208	36926.3	2875.98	1.36152e+07	2.69033e+07
9	TITLE 5	6.73304e+06	51073.6	442282	26360	231350	63262.5	21721.1	17415.3	58054.8	22120.4	11133.7	723361	3.00826e+06	209326	724254	85404.9	33720.1	443910	203632	29390.8	12302.9	171890	138865	1.10765e+06	53450.9	30516.7	638928	241722	2333.08	2880.87	11183	232945	3329.32	23767.1	15361	50607.4	59348.1	137918	4669.95	8490.34	12218.1	32254.8	980416	267214	409928	224207	1.60016e+07	3.53059e+07
10	TITLE 5	6.83767e+06	47816.8	438095	25173.3	228216	61824.7	20226.1	17437.1	57456.6	21742.9	10448.3	719756	3.04565e+06	207089	731031	85898.3	35413.7	452542	203394	30731.8	11404.7	167498	136638	1.11149e+06	52597.3	30024	642116	242346	2979.98	2886.38	11824.2	232046	4622.3	24447.1	16547.9	51513.5	59254.3	141783	3878.13	9317.24	9995.59	33163.6	999334	268195	411759	225441	1.59788e+07	3.52499e+07
11	TITLE 6	6.80497e+06	54331.3	353223	12093.1	70115.7	15116.9	21314.1	11017.3	117902	22939.3	16600.6	590590	1.65268e+06	170757	112975	44191.9	27586.4	102338	42487.2	13424.8	4579.98	128125	5486.32	1.21113e+06	18243.3	43587.6	2.60852e+06	231148	13845.6	16506.2	12544.7	116527	2760.47	13724.3	12031.4	22046.2	15983	49127.5	2614.57	13002.7	8090.77	13886.2	283764	174836	392770	211061	1.22317e+07	2.8621e+07
12	TITLE 6	6.90257e+06	54712.6	353393	10814.2	69362.3	14120.9	20557.4	9974.07	119611	22807.7	16340.6	590414	1.66783e+06	171791	113930	44859.8	27272.9	103726	40601.5	14121.9	5519.34	129861	5875.01	1.21529e+06	17777.8	45577.6	2.60571e+06	233414	12220.4	16180.1	11884.9	115784	2363.8	14808.5	13813.5	21851.8	14814.5	52551.8	2966.78	14325.1	7374.58	14256.1	287981	173563	393070	210438	1.22017e+07	2.85725e+07
13	TITLE 7	6.51473e+06	52476.2	392123	17224.4	148532	35563.7	17280.2	8603.76	59056.1	21910.7	7579	488068	1.84276e+06	189321	243861	41032.4	32941.3	284446	95131.5	21790.9	10700.8	127139	32895.6	1.02849e+06	22041.7	33629.3	607331	210279	5005.9	3893.48	3926.6	124977	2910.72	5202.56	7765.67	32669.6	23612.1	77646.3	6880.87	9029.13	5214.76	18859.5	445920	128304	361226	192739	1.36742e+07	3.11983e+07
14	TITLE 7	6.6154e+06	53843.2	392122	17249.5	150355	37227	17116.6	11693.1	61949.7	21948.9	8781.63	489994	1.85668e+06	193262	245234	40487.9	33290.6	288488	95582.8	22006.6	10544.5	128171	33835.7	1.03217e+06	21794.9	33618.8	610130	211378	3836.89	4244.36	4067.51	128932	3738.44	5426.81	10157.7	32854.6	23700.8	80600.1	5350.85	11015.4	6339.41	20107.6	456138	131074	360100	193738	1.37065e+07	3.11828e+07
15	TITLE 9	6.82545e+06	66724.4	554637	25512	204569	57607.6	28384.3	13475.7	80211.9	23111.9	17188.9	926114	925210	176820	330669	91177.6	40378.6	452769	395931	19153.7	16831.1	172252	13481.8	1.28998e+06	37414	64275.3	751383	218411	6096.55	6199.81	4258.38	268765	3449.09	16919.2	13383.3	18800.2	99326.3	78517.8	4786.7	8469.92	2873.2	27021.7	751794	215877	382202	203427	1.51007e+07	3.36729e+07
16	TITLE 9	6.93356e+06	69560.5	555950	26064.7	203359	54959.5	27758.2	14150.1	80931.2	23958.3	18605.4	928108	935369	175545	334616	91263.9	40955.1	460575	401372	19374.1	17968.6	171865	13948.1	1.29512e+06	34901	64454.7	754467	221115	5544.24	6110.21	5926.34	268862	4174.04	16367.7	15087.7	18107.7	100557	78809.3	3002.42	9978.25	3006.94	24814.7	762253	215570	380899	205299	1.51263e+07	3.3686e+07
17	TITLE 11	6.8325e+06	81796.8	667169	23697.5	180645	48333.7	21128.5	17882.7	79673.6	5918.58	7177.87	1.05268e+06	1.21681e+06	202110	315490	101503	36145.3	428204	223470	17546.7	14752.1	172352	31227	1.07644e+06	28310.6	44137.1	621600	201303	3808.07	4153.82	4184.07	296030	3967.41	11077.8	12778.2	21716.9	83804	61490.4	4407.73	10848.7	3584.32	28207.4	689743	215201	337083	181269	1.63826e+07	3.64189e+07
18	TITLE 11	6.91436e+06	82290.1	668669	24251.6	180741	48902.8	18728.7	18777.4	82734.3	6716.66	7436.71	1.05444e+06	1.22294e+06	199536	314377	102281	36856.3	435938	224387	17741.2	14036.7	172666	31287.6	1.07725e+06	27051.4	44956.8	622970	201699	5116.44	2692.65	5009.46	292275	3476.8	12511.6	14474.1	22642.5	85170.2	62660.4	4178.75	11794.1	3768.54	29036.1	704357	218375	336258	180788	1.63762e+07	3.6407e+07
19	TITLE 12	6.52343e+06	45246.5	314645	14335	96113.6	15029.5	19582.4	10573.4	27988.3	7706.75	9031.81	444675	1.31945e+06	179530	174213	21928.5	34615.8	173293	79181.8	15105.7	8949.4	149505	8908.14	742105	18046	34738.4	804450	213154	3030.53	4419.92	4537.04	128955	3232.64	17803.3	13189.5	24034.6	34547.1	52156.5	3431.49	10323.8	4754.68	19507.9	431573	157285	364728	196113	1.27427e+07	2.92132e+07
20	TITLE 12	6.62544e+06	45310.2	313982	15287.4	96492	16155.2	20303.9	11194.4	28830.9	8054.52	9473.6	448123	1.3301e+06	180888	176045	21601.5	33749.7	175902	75918.6	14728.8	9114.61	148296	8877.37	744654	18111.2	35071.6	805859	212020	4795.04	2872.41	5755.63	120069	3490.34	18443.2	12680.7	24778.4	36674.5	51432.8	2959.69	12420.5	4505.78	20091.6	437562	159919	364190	196009	1.27447e+07	2.92265e+07
21	TITLE 13	6.65729e+06	42453.4	1.1641e+06	38534.8	212117	78760.9	8933.24	8676.37	178155	100419	38980.6	2.33224e+06	5.15422e+06	122686	501102	646051	66956.2	220828	241987	226145	8363.72	489300	4544.33	1.18084e+06	38336.4	51976.4	2.49704e+06	16152.8	15134.7	18184.5	52285.8	875367	8870.2	12134	12693.4	54906.3	20452.2	111629	8373.77	9378.16	17254.7	23282.7	586465	352991	35943.7	2881.93	1.30639e+07	2.59867e+07
22	TITLE 13	6.77323e+06	39175.8	1.16343e+06	37414.2	211740	79261.9	11164.3	8471.02	180169	100007	39019.6	2.32426e+06	5.18929e+06	121668	504980	640546	69159.1	223391	242318	229263	8331.96	491267	5180.99	1.18742e+06	40341.2	52387.5	2.48888e+06	16945.1	14330.4	18273.8	53391.7	872951	8985.26	13136	12295	53851.5	21427.7	113556	7973.02	10046.2	18866.4	22867.7	593675	355163	36568.9	2492.74	1.30415e+07	2.59023e+07
23	TITLE 14	7.58371e+06	33771.1	662339	35664.8	181532	57828.6	24477.9	13060.9	22429.3	29517.5	2117.08	1.22613e+06	2.98714e+06	88538.5	818985	348627	33532.1	314371	156615	60732.1	4430.66	246384	3236.46	1.09269e+06	49772.6	62205	1.02935e+06	18293.3	5864.28	6755.97	12978	406124	5400.6	15433.4	11170.2	61181.3	11814.4	150437	2891.65	7379.27	9642.02	21525.6	678696	391036	34208.2	2989.63	1.04648e+07	22647046
24	TITLE 14	7.69513e+06	31874.4	656973	34297	181067	58095	23790.5	12735.5	23859.2	29859.4	2343.87	1.21881e+06	3.00865e+06	86829	821584	348088	33177.9	317408	156337	62607	4937	242602	3438.8	1.09456e+06	50974.1	63076.7	1.02611e+06	17402.1	6964.79	7518.01	13730	400763	6608.15	15367.7	10277.9	63140	13372.1	150888	2117.05	7258.59	9389.22	23357.8	684988	394153	32266.7	2380.15	1.04605e+07	2.26241e+07
25	TITLE 15	6.30947e+06	39229.7	861390	51322.6	224170	85969.8	19180.5	17135.3	20355	31322.5	10227.3	1.6823e+06	4.2269e+06	117224	547904	442692	44561.7	249969	70767.2	43157.5	6672.84	319234	6359	983352	38679.2	43579.6	2.38518e+06	12437.8	10909.1	9305.66	16994.4	535145	3881.67	10460.3	11232.1	68614.8	10329.1	149097	2740.36	8409.08	13595.3	14788.2	595996	384405	30534.9	3000.18	1.42045e+07	2.92205e+07
26	TITLE 15	6.41069e+06	38475.6	852945	51617.8	225466	85572.7	19355	17322.3	20167.1	32401.7	9977.54	1.6696e+06	4.26623e+06	115899	551411	441420	45328.2	253643	73813.6	43567	6113.87	315974	6444.16	988468	38034.9	42608.5	2.38249e+06	12458.2	10965.1	9633.97	17179.3	529762	3712.37	10807.6	13408.7	68923.7	10883.7	151531	2669.92	10204.5	13877.9	14530.9	604943	383256	31577.1	1828.12	1.42174e+07	2.91798e+07
27	TITLE 16	6.54432e+06	50316.3	2.30977e+06	189345	577558	327313	36676.6	8153.19	65494.4	32660.4	4581.24	5.07316e+06	1.38882e+07	125167	2.19752e+06	1.31749e+06	535962	757235	535345	538414	16603.3	907127	56920.1	1.58361e+06	126622	55104	704781	16548.3	2353.73	5105.98	144767	1.78411e+06	13499	13212.9	6293.6	165924	38068.5	351386	43429.4	17463.9	47823.2	34890.8	1.54634e+06	585868	34486.3	2066.42	2.06839e+07	3.609e+07
28	TITLE 16	6.6618e+06	51021	2.31441e+06	190136	576840	327882	37543.7	10050.4	68273.3	32883.4	4820.94	5.08907e+06	1.40127e+07	121914	2.21325e+06	1.31994e+06	552223	775747	539244	546049	16458.5	907766	58242	1.59306e+06	129692	55607.2	706353	17260	2002.57	4745.15	147597	1.78876e+06	15448.7	13225.6	5453.91	167435	38831.1	357099	43343.6	16929.6	48306.2	37551.8	1.58171e+06	590258	36684.4	3789.8	2.07557e+07	3.62007e+07
29	TITLE 17	6.8801e+06	44846	230385	13419.6	79807.1	9981.59	19222.1	8705.49	54674	10514	7347.74	471035	3.44719e+06	133627	434065	34731.4	35986.3	240596	97516.3	35177.4	4698.97	93538.8	2638.53	1.11163e+06	26391.5	57977.4	844244	233645	4779.56	5217.49	6887.85	73462.6	4004.33	28660.1	12980.1	40770.3	16577.6	102507	2423.7	12189.3	12081.7	21649.8	484256	249814	392280	215689	9.99857e+06	2.33064e+07
30	TITLE 17	6.97832e+06	44590.4	227513	13707.7	79096	8763.62	19148.6	10252	55320.7	9997.78	6102.77	467904	3.46989e+06	134851	435614	40281.7	36264.6	243519	97270.7	35069.2	5320.04	92546.3	3156.17	1.11568e+06	26168.8	57645.2	847040	233883	5944.56	5509.39	7473.98	71516.6	4046.39	29432.7	12329.5	40645.4	16896.6	102552	2562.87	13328.4	12036.4	20755.7	489363	249058	394177	217753	9.97381e+06	2.32863e+07
31	TITLE 18	7.6818e+06	31377.2	377789	13333.4	95002.2	16616.9	12068.4	6516.38	55074.9	11661	4954.29	652476	2.06364e+06	110352	301037	149488	45398.2	174374	43829	49460.8	3594.32	130613	2926.33	1.16522e+06	22909.1	76373.6	738297	216913	3017.8	3423.77	6056.77	182170	3397.49	15768.8	10776	44820.8	13399.2	75293	3078.53	11127.5	7368.47	14638	410543	160900	350339	198898	8.82525e+06	1.87761e+07
32	TITLE 18	7.77974e+06	32005.6	374755	13490.8	92792.6	14421.9	12260.2	5592.32	55445	13317.6	4063.62	651983	2.07798e+06	109408	302593	151124	46307.2	177872	43169.6	49646.4	3775.64	132276	2956.15	1.16908e+06	56772.3	75462.6	737618	217851	4682.35	3782.82	5143.96	181182	3863.35	15952.3	12160.7	44828.3	13598.9	75808.3	3354.9	12510.6	8004.3	14996.5	413441	159688	348929	198586	8.82796e+06	1.8708e+07
33	TITLE 19	7.49625e+06	56728.6	345414	16906.1	139572	35158.6	15440.3	7335.25	69662.9	19983.6	5309.44	581678	1.29619e+06	164247	225814	48864.5	40291.4	321042	140984	25630.4	5057.88	116754	58659.6	1.17837e+06	25612.4	61328.2	632097	186187	3903.36	3776.63	5604.56	118765	3733.5	10015.3	11479	41182.1	38174.9	71039.9	5032.87	11218.2	5965.85	16119	515707	147756	301355	168148	1.17759e+07	2.66814e+07
34	TITLE 19	7.61887e+06	56853.3	343973	17048.1	137750	34696	13460.1	9368.6	70093.2	20866.5	5276.87	585961	1.30464e+06	167482	227433	49273.9	40547.1	327477	141659	24622.3	6259.34	113638	56537.2	1.18087e+06	24543.4	60855.7	634992	186536	3927.69	3421.34	5401.61	120097	3209.04	9633.45	13884.2	41777.9	39687.6	73655.3	5065.34	10466.7	4527.67	19321	527625	145505	301639	167792	1.17781e+07	2.66765e+07
35	TITLE 20	6.56911e+06	62644	462158	25813.5	188367	33117.7	18511.1	13668.9	72822.9	21868.5	12103.2	583511	287431	222405	140168	59892.7	31299.7	330989	200870	18764.6	14024.4	137899	40023.3	1.17128e+06	22497.3	64251.5	581679	223145	2314.09	2128.61	3515.05	155611	2919.3	6917.99	15309	29355.9	38273.6	48551.7	5730.55	9774.84	2801.42	26088.1	532162	107032	367901	202418	1.54064e+07	3.40704e+07
36	TITLE 20	6.66331e+06	64958.8	465625	25671.1	187895	32159.5	16834.9	14308.4	74688.7	22661.9	12596	589273	290232	223678	138807	59997.7	31968.7	335663	200263	18573.4	15266.4	135349	40167.6	1.17548e+06	23752.4	64203.9	584429	222485	4173.5	2912.48	3546.58	157434	2878.32	6459.94	15603.4	29543	36694.4	50288.7	4955.07	9654.6	2581.08	30387.9	539560	107065	366131	201801	1.53954e+07	3.40621e+07
37	TITLE 21	7.36311e+06	74748	586875	16544.6	149560	44372.4	17838.6	11908.1	79208.7	9356.71	2652.66	866467	393538	138932	227726	73181.4	28695.3	388559	270661	10519.9	14337.1	135990	13373.2	970737	22897.4	43570.5	553306	168457	4683.71	2715.39	6441.65	215946	3138.8	6907.55	11661.7	29770.1	67656.5	58995.3	2039.4	10367.2	2167.13	23243.5	494559	179579	278112	153492	1.29836e+07	3.02795e+07
38	TITLE 21	7.48977e+06	74545.6	591296	16532.5	147742	42987.3	17647.3	9991.27	79718.2	9456.06	2855.22	868614	396978	139742	229090	74364.2	30156.8	395720	272146	10684.4	13739.1	138762	12903	978185	23561.3	43297.4	555970	169234	5337.24	3849.6	4176.34	214057	2655.98	5723.66	11516.1	29385.8	68576.6	59640.9	2984.84	11450	2119.71	23343.5	501708	178809	278880	154578	1.30145e+07	3.03551e+07
39	TITLE 22	6.84857e+06	56076	319832	15643.5	81067.4	17022.1	23981.3	11113.2	148850	19077.3	9080.5	648922	1.17615e+06	198635	205408	44488.9	28946.2	191334	116954	16661.1	6548.42	135889	4475.9	1.24233e+06	16669.5	48491.8	1.08875e+06	220838	6719.09	4091.4	6669.45	105031	4229.49	26217.9	13629.6	40685.7	36682	60949.3	2028.68	13015.7	4481.88	32077.5	421524	224676	367183	196199	1.29226e+07	2.86846e+07
40	TITLE 22	6.96807e+06	55293.5	321731	16657	82180.2	17326.7	24970.7	12072.3	149566	19477.7	9032.98	649484	1.18691e+06	200043	207261	48878.2	30880.1	194668	116185	17910.8	7642.89	133654	4713.04	1.24772e+06	17146.1	46948.6	1.09048e+06	219735	5144.36	5032.52	7951.93	103894	4030.18	26519	12906.8	40636.1	38897.2	61438.6	2751.96	13788	4054.92	31758.5	428069	225379	368273	196129	1.29356e+07	2.86883e+07
41	TITLE 23	6.21353e+06	56865.2	399004	17808.4	111573	29875.6	12967.6	8056.26	69672.1	22474	6482.67	449089	193833	194169	94372.6	48453	29568	272312	189173	8620.56	13803.7	133297	9323.52	895341	15849.3	62295.5	414722	190457	3414.1	3142.92	4328.44	132030	2853.65	3940.3	12650.1	19451.4	21854	55369	4453.55	10869.3	2244.59	17680.5	364292	84274.5	316045	175956	1.40417e+07	3.31652e+07
42	TITLE 23	6.3006e+06	56721.4	396024	17166.1	114369	29566.4	13344.1	8836.98	71518.9	23881.9	6968.28	447852	194368	194324	94146.9	49330.7	30663.1	276972	191100	8665.51	12306.9	134307	9726.9	898718	16731	62628.1	411973	192824	2979.38	2311.61	3423.8	134229	2211.5	5311.73	15536.5	18812.8	21129.4	51660.9	4371.77	12700.7	2487.13	16217.6	368788	88340.1	314741	174317	1.40513e+07	3.31041e+07
43	TITLE 24	6.6441e+06	67666	525267	14949.5	141618	29043.2	16335.4	9137.94	76609	14820.4	19732.9	873743	396709	168411	170448	89524.5	29236.7	414848	295812	6188.65	11859.4	128927	26936.1	1.09227e+06	23376.4	51481.7	552690	159982	4513.15	2276.12	5385.76	225686	3553.72	10304.3	12960.8	18325.4	92467.8	55180.7	4148.98	8352.06	2170.93	23374.1	481769	199500	281216	157676	1.33923e+07	2.98982e+07
44	TITLE 24	6.92678e+06	68962	528573	15820.1	143851	30123.2	18098	8199.04	82454.3	15955.2	21898	875827	414405	170167	175487	90235.3	31462.8	438067	307342	8331.02	12363.3	129833	27299.5	1.13342e+06	25822.4	55087.6	566990	168352	3984.74	2835.11	5605.33	226402	2860.76	11561.2	13369.1	20552.3	96741.7	59300.9	4269.92	8752.56	2591.52	21791.9	511856	212345	293666	160580	1.34326e+07	2.98657e+07
45	TITLE 25	6.0576e+06	55236.8	347632	25052.5	139276	32181.2	29054.4	17412.8	48749.8	14986	41994.6	694852	1.15289e+06	215079	302553	51445.8	37677.6	314054	46692.1	14193.5	10806.9	149133	2907.54	940395	25354.9	46838.5	925895	236226	3943.88	3178.36	6010.48	107929	4302.17	25537.7	14810.3	50690.8	17284.9	153124	2178.37	13384.8	3824.95	16322.5	618290	222650	372558	208104	1.50288e+07	3.44118e+07
46	TITLE 25	6.14677e+06	55441.1	349261	24654.5	136775	34019.8	27511.8	18424.5	48197.9	14871.2	42494.7	700655	1.16528e+06	217449	302041	51257.3	38818.4	319724	48125.1	14046	11533.4	149514	1207.4	942768	25128.1	46947.7	928663	235838	3635.89	3394.67	6831.85	107817	3303.12	25519.5	12191.4	50002.7	17886	156439	2541.58	15318.6	3848.35	17024.2	629608	224132	375107	208144	1.50279e+07	3.44473e+07
47	TITLE 26	6.81936e+06	77271	535809	19459	167129	40215.2	16149.1	11352.8	55005.3	37483.5	8494.6	875013	963424	190378	214835	80062.1	38795.7	386047	207643	18085.9	10323.1	133920	42811.1	905486	22960.5	50838.9	653335	234818	4502.1	3629.95	5580.16	177992	3075.47	13894	14284	25729.8	43219.6	99114.3	7056.63	11070.3	5609.16	21603.7	654293	169241	393894	214807	1.46787e+07	3.32087e+07
48	TITLE 26	6.9353e+06	77659	533273	18189.4	167436	41177	17718	11909.8	56155	38823.7	9382.87	879084	972084	189142	214202	79648.6	40289.9	392497	208232	18436.8	10192.4	136370	44083.3	911490	22405.9	52901.1	657016	233250	3645.94	4142.28	6639.15	172906	4403.56	12951.9	15771.1	27266.3	41382.6	98870.2	7228.97	10260.5	4024.77	21665.5	666555	166940	393050	214044	1.47171e+07	3.31683e+07
49	TITLE 27	6.71139e+06	71411.4	550659	19838.9	183774	43419.3	26437.9	14203.6	33649.8	12120.2	4173.75	874395	706850	167211	228906	84947.9	27096.3	427746	205298	12819.7	14368.4	142127	4415.98	1.02391e+06	25119.5	50038.8	620414	187041	5388.52	3651.76	5420.68	234578	4203.16	13314	12270.8	28634.8	100232	69928.6	2794.21	11590.9	2716.22	27423.7	519681	251104	317682	169324	1.43906e+07	3.29037e+07
50	TITLE 27	6.81519e+06	69806.9	551171	18323.9	181970	42668.6	26889.4	14173.4	33953.7	12273.7	4815.96	874531	712878	164943	228804	84593.4	27952.5	435774	207336	14508.4	12087.7	143946	5566.94	1.02719e+06	23444.1	50650.5	622585	189056	3511.22	4103.39	4906.23	237379	2533.88	14029.8	14221.7	27730	99972.4	70930.2	2221.98	12238.2	2431.79	26233	525450	257528	316375	169046	1.43937e+07	3.28561e+07
51	TITLE 28	6.62961e+06	56285.9	322441	24491.6	125786	24815.9	43988.5	36362.5	45333.9	16663.6	4517.6	541167	5.43789e+06	257874	403524	53937.8	57643.8	313378	167416	107974	13603.3	143317	3080.94	1.17385e+06	34622.1	33616	3.6479e+06	286120	16397.9	9321.04	15950.7	97393.7	19934.5	49362	21565.2	64200.3	44124.8	92242.7	3065.12	13202.8	17911.7	61184.7	792614	520019	488012	262329	1.66956e+07	3.63327e+07
52	TITLE 28	6.73456e+06	57873.4	322464	24386.1	128710	23530	45613.2	38264.5	44134	17399.7	5784.6	542446	5.49504e+06	257856	406290	53036.7	59174.6	319163	167563	109088	15407	145881	3503.03	1.18101e+06	36523	36149.2	3.64694e+06	288202	17149.3	10646.1	12253.8	94438.2	20266.5	51404.7	19239.9	65187.3	45250.2	93556.6	2940.59	13662.7	18020.1	63181.5	801802	517787	487569	261023	1.67125e+07	3.63042e+07
53	TITLE 29	6.71991e+06	47052.8	816424	24033.3	180947	49272.9	22604.1	11016.9	34629.4	22728.7	11753.8	1.41261e+06	2.58506e+06	146454	520448	256637	40684.1	423591	111054	40964.9	9162.93	240959	64338.8	1.08757e+06	45115.9	41770.4	792681	217409	4367.22	5069.19	22310.6	436475	4324.2	15845.4	12965	52671.5	23520.5	139237	3781.03	10163.7	8098.52	18548.4	697601	347006	369205	203392	1.41675e+07	3.14977e+07
54	TITLE 29	6.81142e+06	49147.9	807295	23979.7	179885	48348.5	23425.1	11792.6	35426.6	22706.8	11966.6	1.39348e+06	2.59838e+06	147103	521845	257580	40729.1	429184	111902	42337.3	8399.48	235730	64850.2	1.08897e+06	43603.5	43267.7	794174	216021	4595.89	3690.52	20564.6	431311	3609.77	15922.2	13023.6	54054.6	24303.4	141157	2755.47	9505.08	8004.05	22655.2	707429	349540	370925	205850	1.41696e+07	3.1502e+07
55	TITLE 30	6.84161e+06	72877.1	536597	21544.3	165858	43220.9	16380.4	10098	114511	73484	3401.8	833585	1.5185e+06	185660	261048	81944.5	31979.2	373192	133025	36235.7	8819.27	137818	26404.8	1.07428e+06	28322.1	37848.1	564653	205676	3521.67	3178.39	4487.33	224645	3052.66	14902.2	17807.8	45704.2	38757.9	93643.8	6128.56	10406.9	3720.06	22084.3	621312	200994	349712	194061	1.44802e+07	3.25012e+07
56	TITLE 30	6.94797e+06	73652.4	537627	23171.2	165649	42671.5	15075.5	10421.5	115890	75875.4	3101.58	835202	1.53403e+06	185761	262911	77790.7	33233.6	381306	133693	36802.7	9177.52	139379	27600.8	1.0783e+06	28140.8	38081.9	566545	203755	3257.7	2861.66	4350.25	222612	3556.8	16102.6	13515.7	44630.2	39363.9	96760.7	6512.64	12802	5446.23	22616.7	634930	202974	349187	192621	1.44933e+07	3.25489e+07
57	TITLE 31	6.67827e+06	43414	839977	29544.6	212284	64260	20362.2	16348.9	38175.7	25347.2	3491.5	1.59554e+06	2.24551e+06	160330	586278	418688	37668.1	305938	529920	47517.9	20409.5	356491	12200.4	1.13388e+06	33449.5	36429.7	488190	10545.7	2842.56	6154.01	46267.9	598734	5475.35	6255.52	15997.9	34537.9	38000	104044	4553.24	10391.8	7539.61	36215.3	716127	212198	37905.1	3135.22	1.48095e+07	2.9716e+07
58	TITLE 31	6.80415e+06	45620.9	845750	28941.6	213867	65930.3	19932.7	15523.8	38722.9	27227.4	4301.49	1.58849e+06	2.26929e+06	159509	592543	419090	39825.5	311635	532545	45884.4	21329.5	356534	12244.6	1.14389e+06	33827.7	38017.1	489234	12429.7	2214.98	5343.46	46454.5	602191	5630.76	10354.3	14821.3	33584.4	38563	104299	4280.06	10886.7	7072.08	38329.4	732990	214426	35549.3	2965.41	1.48464e+07	2.97689e+07
59	TITLE 32	6.73209e+06	41663.5	1.61481e+06	46869.7	241980	96609.2	25528.8	14555.6	93110.6	83181.9	121952	3.32369e+06	6.98697e+06	157595	744485	947999	100809	255127	332100	190779	17240.2	631676	13578.4	1.03414e+06	41287.3	25423.9	2.73215e+06	15042.3	14263.9	17308.2	77403.6	1.20661e+06	10893.8	10708.5	14086.8	54671.5	20876.4	131679	5559.26	11725.7	23032.4	36814.4	684496	397981	36159.7	3356.98	1.77638e+07	3.31672e+07
60	TITLE 32	6.84713e+06	42144.7	1.61665e+06	46116	243026	96135.8	25518.9	13855.1	93261.6	84496.3	125464	3.31297e+06	7.04633e+06	158664	749005	947074	102158	259805	333039	194554	16066.4	630518	13564.9	1.04052e+06	42376.1	25792.2	2.73368e+06	12919.3	13821.6	18126.2	79721.8	1.20554e+06	11844.6	9284.1	13378.4	56622.2	21221.6	136450	6085.78	14233.5	23869.2	36222.6	694682	397571	38798.2	2880.34	1.78016e+07	3.31834e+07
61	TITLE 33	6.44583e+06	49798.4	1.49034e+06	26900.8	218683	75615.6	15206.7	12191.7	59112.2	25784.3	2011.21	3.06965e+06	971111	158190	500811	818178	39963.2	262481	376904	27078.1	17587.9	614877	13006	1.60042e+06	36295	52981.7	609497	11577.4	5247.41	8964.32	83626.6	1.12955e+06	4017.72	6467.35	14432.9	44297.5	37473	101019	5359.98	10019.7	2068.08	25007.8	592546	198397	40865.9	2673.61	1.60828e+07	3.1985e+07
62	TITLE 33	6.55146e+06	51940.2	1.49427e+06	27580.6	215752	77000	16712.4	11926.4	57591.9	26476.4	1904.02	3.07904e+06	981296	160305	503869	816812	40144.2	267063	378080	28739.3	18979.8	616212	13657.9	1.60848e+06	35455.6	53821.6	611718	10629	5941.83	10343.3	86395	1.12854e+06	4336.23	9219.19	14010.9	44570.3	38260.8	102949	5486.37	11482.3	3132.13	26694.5	600848	198294	39997.2	2924.92	1.60531e+07	3.19753e+07
63	TITLE 34	6.82192e+06	37742.9	898661	20012.5	161625	34254.1	14585.7	12070.5	79339.6	32466.6	7628.58	1.86024e+06	1.69371e+06	117242	645527	508285	39003.5	258945	120686	22254.4	4832.92	301479	9091.52	997928	37929.1	31866.9	2.84646e+06	10833.3	14314.6	17761.3	17710	585270	3119	15263.9	12408.3	58486.2	19819.5	108601	2467.27	7898.85	5476.86	15507.9	567271	266082	34751.8	2560.48	1.14365e+07	2.30533e+07
64	TITLE 34	6.9502e+06	36308.3	893990	19892.9	161487	34792	14697.2	11716.9	80534.8	32680.1	8602.64	1.85557e+06	1.71307e+06	116616	649037	507429	38604.1	263722	122048	22259.8	6182.61	301320	9758.56	999075	39285.2	31869.9	2.8448e+06	12319.3	16567.8	19606.7	17562.7	582124	2475.27	14292.4	12816.2	59362.8	21656.7	109010	2597.61	8189.16	5385.35	16083.3	577646	267370	35178.5	2935.43	1.14267e+07	2.30304e+07
65	TITLE 35	6.72459e+06	50270.7	714421	24232.6	151595	32083.9	21312.4	18025	22609.7	42395.4	3437.12	1.22419e+06	7.96307e+06	187114	533174	278136	42688	209117	164804	70194.6	9603.48	257926	9435.82	1.08443e+06	37005.7	32399.3	2.62871e+06	12407.3	15075.1	15087.8	13491.6	402704	7918.06	10452.4	17094.7	45488.4	9143.62	110930	2532.56	7631.18	28407.1	35613.8	468092	335892	36661.3	2960.9	1.4454e+07	3.00061e+07
66	TITLE 35	6.86933e+06	52329	709042	24977.3	151488	31680.6	20362.1	17564.1	22210.9	41167.8	2659.69	1.22145e+06	8.06115e+06	187762	539040	278369	44165.7	211792	163346	71573.7	11264.1	260456	9218.74	1.09264e+06	37015.5	34103.7	2.6317e+06	9175.06	15794.9	13107.2	15083.1	402432	7812.87	11177.6	13806.6	45561.7	10190	111813	3036.55	8134.77	27784.2	35261.2	472107	335768	34759	2877.35	1.4467e+07	2.9989e+07
67	TITLE 36	8.00338e+06	28914.3	938778	33362.8	163391	53186.9	33402	12351.9	30111.3	28960.2	13281.4	1.80063e+06	8.57151e+06	100337	778000	517738	44128	266206	187526	79651.1	4920.93	314015	15081.9	915592	48630.9	25627.1	2.51689e+06	9407.05	11997.1	15881	20016.2	591077	7865.33	11508.5	12886.9	53064.9	9084.73	127048	4140.84	9375.44	29670.8	25779.7	584813	383468	22208	3901.33	1.12925e+07	2.25408e+07
68	TITLE 36	8.14555e+06	28531.8	936715	32584.3	164484	53821.3	31900.9	12807.7	29593.6	29730.4	12843.1	1.79397e+06	8.67204e+06	102322	783699	517596	45675	270413	187832	79585.7	5484.76	311816	16468.3	918938	48950.7	25738.7	2.5164e+06	13277.2	11118.8	14815.8	19688	590798	6278.41	12962	11960.2	53183.7	11151.6	129901	5314.8	10673.5	30173.7	24277.6	595157	387750	24956.8	2369.28	1.13187e+07	2.25912e+07
69	TITLE 37	7.15651e+06	43031.6	936007	18402.4	133419	30187.9	25666.8	12217.9	57648.6	55202.7	3236.73	1.87116e+06	1.93912e+06	120766	470401	477084	33281.8	240936	126625	17363.5	5522.22	325436	8481.61	818374	31999.2	20912.8	2.33102e+06	13053.6	12776.4	16109.7	24869.7	587622	3612.63	13221.7	12781.3	48941.7	21544.4	94329.8	1702.94	10552.4	6779.72	20898.8	437335	285840	35167.6	2853.09	1.17994e+07	2.42751e+07
70	TITLE 37	7.27901e+06	45184.4	928825	16101.6	131088	29890.9	24858.2	12059	57821.6	55218.9	3900.93	1.84331e+06	1.94985e+06	120910	471499	474046	31497.4	244851	125041	18601.7	5824	322123	7973.79	821195	31000.4	20735.5	2.3324e+06	13580.3	11579.8	16596.4	21866.9	584465	3560.2	13733.6	11356.8	48886.1	20359.4	96204.3	2184.59	10510.9	6288.58	19494.2	445521	289376	34925.5	2215.4	1.18061e+07	2.42482e+07
71	TITLE 38	7.06539e+06	45134.8	384968	22284.5	112012	16726.2	32798.4	13815.6	95445.1	38733	18711.7	577392	7.61411e+06	179744	549708	55738.2	42322.8	240559	74156.9	53871.9	5802.01	126187	6917.23	1.39721e+06	35898.1	47745.2	4.44589e+06	248485	23754.8	25434.6	19415.5	118582	4950.09	31463.5	17272.9	62255.9	26589.4	102494	4402.22	12608.9	26083.2	21113.3	623060	389839	415510	227906	1.29189e+07	2.85183e+07
72	TITLE 38	7.16361e+06	45455.5	384701	20607.9	110634	16495.5	33172.6	13080.3	96412.3	40130.7	19256.4	579121	7.67904e+06	178623	553592	54182.9	43082.2	244351	72970.4	53540.2	5659.11	123842	8058.53	1.40266e+06	36239	47701.9	4.4373e+06	250780	25451.9	25533	20512.4	116964	5358.97	32044.8	15507.6	62456.3	26561.7	102008	3776.14	12920.6	26556.3	22562	627642	389376	412032	229744	1.28999e+07	2.84752e+07
73	TITLE 39	6.91369e+06	77121.6	496780	17112.6	127153	21239.4	19513.8	10589.5	51898.7	54870.8	8197.73	881661	933584	221246	197749	67597.2	28473	291554	414736	11855.3	15395.7	171665	46597	1.43319e+06	23326.5	50105.4	658047	257238	4879.46	4398.39	7513.37	163943	3950.65	9091.57	14753.3	27563.1	67815.2	55121.1	5494.78	11844.4	3195.71	36406.8	367985	174421	434719	237515	1.58526e+07	3.57706e+07
74	TITLE 39	7.01644e+06	77019.6	495076	18642	128948	21251.4	19893.6	10951.5	52185.6	56283.2	9744.57	884902	943558	221967	197367	67233.9	29408	297598	416326	12374.6	15769.5	174825	46001.7	1.44085e+06	22581.1	50892.8	660886	257338	4670.15	4790.98	4563.69	162095	3380.45	10478.6	16530.1	28666.8	68048.3	55056.5	5334.78	11755.1	3959.09	37845.1	373149	175129	435687	237512	1.5851e+07	3.57596e+07
75	TITLE 40	6.49446e+06	101092	757218	26519.1	158598	31077.5	26279	13617.6	24682.7	57825.7	8325.22	1.24763e+06	784404	286562	274764	113120	32256.2	408762	397749	10032	11058.2	230916	63983.1	811693	21719.7	15949.2	768011	246916	7277.68	4386.85	6716.57	296583	2779	6477.89	21472.9	18189	87693.5	68081.4	6028.1	13859	2978.58	30964.8	423512	224771	398978	229111	2.08583e+07	4.58943e+07
76	TITLE 40	6.58462e+06	97300.1	758935	26431.6	156775	33123.8	25400.9	13141.9	25533.7	59898.1	9251.37	1.25168e+06	791557	284970	274184	112987	33163.8	415860	398132	9384.41	11383.9	230176	65671.8	813817	23525.2	16113	767208	246252	7093.3	5341.81	5049.06	298359	3367.09	6931.93	19025.2	18437	89918.8	67368.1	6501.95	13938.2	4147.56	32269.3	428573	221423	397692	229764	2.08425e+07	4.58725e+07
77	TITLE 41	6.97052e+06	66887.6	486637	27822.8	203456	56761.9	19733.1	18032.1	25078.9	59042.8	7362.41	742168	1.54043e+06	214054	410380	70789.3	28483.9	463571	200322	13246	12784.7	159743	138005	1.03721e+06	41580.6	26030.6	766521	215095	4892.21	3729.34	5178.71	180136	2521.47	10789.1	15945	47677.3	29503.9	137158	4094.4	9567.56	5657.8	27597.4	582749	335328	369765	201218	1.62014e+07	3.57157e+07
78	TITLE 41	7.08384e+06	66432.2	489289	27379.9	205395	55642.3	21448.1	18973.7	24533	61208.1	7754.62	747129	1.55505e+06	214241	414120	72327.3	30858.9	472188	200571	12924.7	13120	159454	141366	1.04331e+06	43896.4	27204.5	770139	214720	4343.87	4155.42	5925.63	183442	2996.72	11575.7	14861.5	48205.8	30090.7	144572	5378.92	9555.66	4932.04	27335.6	588055	338080	372395	201847	1.62492e+07	3.5768e+07
79	TITLE 42	6.86862e+06	61495	372361	28614.9	170029	44335.1	20755.6	16786.7	28748.7	20976.6	3364.21	617094	4.28626e+06	176790	339644	52984.9	34241.8	299172	144517	40947	6903.78	128713	49623.5	1.0373e+06	35277.9	25234.4	605383	218479	2263.3	2782.86	4906.39	122254	4753.12	6933.15	13167.8	42417.9	15952.4	102034	8838.54	9578.91	14960.7	30963.9	466561	198391	379385	207219	1.3343e+07	2.98481e+07
80	TITLE 42	6.96988e+06	61774	375282	29167.1	171266	44217.9	22461.7	15567.8	28088.4	22212.8	4639.09	617232	4.32337e+06	176862	341279	51309.1	34512.7	303394	144654	41670.4	4641.73	128892	50610.8	1.04118e+06	35271.8	25908.9	606813	216919	2389.34	2321.71	4529.14	124696	5420.55	6987.35	14247.2	44236.3	15157.9	103864	8772.18	10733.9	14711.2	31311.4	471143	199384	379981	207668	1.33333e+07	2.98127e+07
81	TITLE 43	6.89289e+06	94431.2	644826	21869.1	158641	26531.8	25443.9	13007.3	54178.4	17969	9408.12	983439	646973	277543	265388	98242.6	26612.1	481401	433538	12621.3	17808.1	193443	50381.3	1.10708e+06	26724.2	28581.5	693811	238854	3787.01	4330.66	5722.27	256835	3565.74	9863.83	17350.5	19423.7	94404.6	60993.2	3746.43	13617.6	2539.19	37740	501987	217169	399309	218710	1.91022e+07	4.00919e+07
82	TITLE 43	6.97824e+06	94109.8	649408	20953.6	158771	28376.5	25687.4	10280.3	55045.7	18667.4	8979.45	981879	651090	275793	267145	96103.2	27883.7	488546	435455	13531	17181.1	193142	50914	1.10577e+06	26657.9	29237.6	696474	239857	5418.84	2767.27	5428.88	257638	3461.65	10701.8	16833	19867.4	94746.2	60994.2	4243.09	13927.5	3240.34	38071.8	508072	217822	401135	217434	1.90926e+07	4.01002e+07
83	TITLE 44	6.84182e+06	52741.3	268846	18436.8	77943.5	15322.6	24893.9	17043.3	49047.8	10842.4	24273	622732	1.46246e+06	234018	189626	42224.4	29659.3	159115	62140.6	16110.7	10991.8	106210	5280.39	1.09858e+06	24205.4	29083.7	2.14727e+06	277120	9594.8	12524.6	11133.5	86126.2	4172.28	30997.4	16410.5	39077.9	34387.6	67456.9	2831.18	15025.7	5754.32	28374.7	375668	260056	455732	252993	1.44616e+07	3.08457e+07
84	TITLE 44	6.96877e+06	52958.3	271580	18042.1	79240.1	16509.7	25724.5	16044.6	49533.1	10483.6	24751.9	628271	1.48067e+06	236806	190263	41994.7	30750.3	162304	61619.8	16569	8672.91	107342	5936.31	1.10225e+06	24405	28553.2	2.15042e+06	274924	10798.5	12335.6	11577.8	87322.6	4530.85	32691.4	16653.3	38577.7	33284.9	67850.9	2411.77	16041.4	5036.86	29634.5	377166	255646	454579	253998	1.45158e+07	3.09416e+07
85	TITLE 45	6.92187e+06	78224	567063	25747.9	167767	33610	27629.7	17896.1	46138.3	18591	3430.2	972346	918993	231744	259074	83211.2	27515.9	382666	373949	18892.7	15956.5	150273	87009	1.27738e+06	28053	58640	841837	252181	6115.12	4703.06	7278.24	219725	4709.35	5854.22	16162.3	28701.7	47778.1	60369.4	5389.72	12420.5	3254.85	51104.5	432689	240689	429737	234357	1.702e+07	3.69425e+07
86	TITLE 45	7.01381e+06	78339.3	566716	24860.4	166398	34772.9	28294.8	16806.4	47621.2	18176.6	3902.6	970963	926347	234878	257197	84588.3	27367.6	388607	374896	19241.4	16562.6	151203	85819	1.27813e+06	27410.6	58456.3	843347	253823	5941.06	5049.16	5728.28	219777	4167.02	5593.61	16342.5	29009.8	48558.9	59292.3	4990.31	12773.2	3618.38	51331.9	437990	242233	428992	236428	1.70129e+07	3.68885e+07
87	TITLE 46	7.04764e+06	58413.5	349618	17091.8	85285.4	26720.8	25152.8	12571	39301.1	21159.6	11414.1	660849	2.01707e+06	243660	189701	50493.7	25313	186342	191571	27229.9	12412	159379	8645.76	1.01414e+06	22107.1	28525.4	1.59261e+06	245244	8599.98	10648.5	7779.35	112246	5394.75	31568	15959.6	42500.8	53881.6	54413.7	3389.48	13702.2	7052.7	48740.4	508437	302324	424891	223050	1.48681e+07	3.19151e+07
88	TITLE 46	7.16444e+06	60663	352295	18507.7	83857.7	28304.8	25931.4	11010	41003.5	22794.3	11424.4	659122	2.04137e+06	245180	191414	50820.2	25924.6	190034	192544	28036.4	11193.8	159375	9591.11	1.01905e+06	21324.6	27865.5	1.59228e+06	245194	8284.9	9739.3	7956.62	116545	5680.77	31806.2	16080.5	42435.8	57217.3	57316.1	1884.85	12083.9	6545.92	47990.4	513728	303464	423176	221630	1.48691e+07	3.18911e+07
89	TITLE 47	7.12862e+06	81234.3	561111	21090	160890	30209.8	22750.7	13521.5	674186	12984.2	3992.27	914799	534217	234567	223585	78471.6	24594.1	395961	266107	17742	15844	161404	45102.6	1.01406e+06	26115.5	27318.5	635531	210530	5453.36	2681.85	5657.68	233585	4407.28	8917.55	15209.3	21840.2	71716.6	62870.9	2197.04	13618	2667.17	35174.4	502816	239279	359133	193876	1.68247e+07	3.59701e+07
90	TITLE 47	7.25404e+06	82583.6	566103	21114.4	162570	30143.3	20333.6	16429.2	679490	12887.5	5176.65	920212	536643	236370	226501	78899.2	25962	402077	265332	17513	15550.3	164082	44303.5	1.02127e+06	24885.4	27596.1	637962	210473	4192.55	5165.89	4978.57	235379	3565.23	8128.14	13764.1	23023.2	70668.3	63517	2220.2	13169.6	3331.98	36436.2	512497	241771	359914	195472	1.68988e+07	3.60724e+07
91	TITLE 48	7.1886e+06	53170.7	382834	15325.5	72198.4	19098.8	27641.1	9817.57	137850	35665.4	16067.1	565896	1.4103e+06	219774	182942	49761	31054.8	148153	229341	17912	10832.7	152609	10176.2	1.06737e+06	23764.3	22712.6	2.36804e+06	234511	14042.1	13774.2	10766.4	134229	4041.43	28567.4	15737.7	41668.6	43062	57053	1828.5	17871.1	4934.6	37495.9	492082	399596	401611	213407	14773334	3.09229e+07
92	TITLE 48	7.30684e+06	57362.1	384165	15553.9	72065.6	18454.2	25364.2	10884.6	138677	34743.6	15356.6	563948	1.42272e+06	219248	184544	47571.8	32673.9	151296	229865	17303.1	10471.3	156262	8922.42	1.07162e+06	24273.9	25283.3	2.36752e+06	233421	16055.8	15298.7	14019.8	130616	3847.47	30046.2	15900.7	42465.8	43190.4	55544.8	2312.84	18030.9	4493.84	38253.6	496657	399477	401220	213483	1.47666e+07	3.09299e+07
93	TITLE P1	6.62346e+06	45447.5	562556	71638.3	259757	114994	22675.6	8913.64	71687.5	27940.2	6720.12	1.00479e+06	5.37762e+06	146383	818543	166935	176689	380162	195174	225122	10634.4	197372	20511.9	1.18519e+06	50007.3	46669.2	1.76475e+06	103584	7810.9	9112.88	10594.2	305868	6846.51	15206	14660.8	79558.4	32476.3	162252	14997.4	10820.2	18145.1	23682.9	844379	409875	172838	95607.2	1.47563e+07	3.0453e+07
94	TITLE P1	6.72049e+06	47290	552055	71556.6	259959	112233	25022.2	11679.3	73166.2	27865.6	7243.47	979643	5.42054e+06	144486	822374	163647	182829	384546	197247	227520	11435.5	193687	21076.4	1.18815e+06	51534.2	48146.1	1.76282e+06	102615	8508.65	8797.09	10878.7	297319	7897.92	15362.4	14182.1	82229.9	33010.9	163066	15205	13157.9	19248.5	24109.2	860446	416591	171030	95762.7	1.4746e+07	3.04129e+07
95	TITLE P2	6.4342e+06	47959.3	563530	71289.8	261280	112839	23192.3	9583.58	71777.2	25400.1	7251.7	987639	5.33157e+06	148666	816981	164445	174684	376162	197000	221636	11389.1	199063	19526	1.18401e+06	51394.7	47732.9	1.77123e+06	103319	8420.63	8450.96	10016.8	303219	7684.39	14362.3	13411.2	81606.4	34085.2	161381	15576.9	11925	18002.4	22433.3	845633	414148	170541	97260.5	1.49546e+07	3.08743e+07
96	TITLE P2	6.57076e+06	45403.4	554801	71007.9	257034	112401	22707.4	11064.6	73322.5	27500.4	6652.57	967580	5.40589e+06	144961	823144	158318	181343	381835	196936	225989	9995.24	193272	19797.5	1.18916e+06	50297	46647.4	1.77171e+06	104638	7895.74	8038.96	8451.88	297580	6741.65	13760.1	14148.5	81907.1	32171.7	166538	16184.1	10949.1	17477.1	22766.6	859445	418412	174881	95651	1.4985e+07	3.08584e+07
97	TITLE p3	6.5068e+06	48365.6	560149	71180.5	260344	112856	22138.1	12554.8	73631.5	26574.2	6734.9	972794	5.38607e+06	150564	824013	157534	176775	379018	199496	225580	10962.5	193721	19450.5	1.19257e+06	49330.9	47647.1	1.79307e+06	105083	8462.94	8643.22	10407.7	296073	5875.67	14846.6	15938.4	82445.4	33022.4	165817	16870.5	12854.2	17866.8	22939	857170	421119	177726	98002.5	1.50988e+07	3.12217e+07
98	TITLE p3	6.61585e+06	43899.7	548846	72958.6	260344	113139	24292.5	11176.9	73539.9	27068.5	6803.36	952583	5.44484e+06	148593	829356	154542	181286	385402	200338	227795	10345.5	190122	19107.4	1.19849e+06	49864.8	47276.5	1.79483e+06	104688	7319.51	9690.87	8671.83	288605	7322.8	14128.3	14490.3	83517.9	34023.2	166565	15610.4	13519.4	17093.2	23607.1	866967	422451	175234	97510.7	1.51166e+07	3.12308e+07
99	TITLE p4	6.66009e+06	46279.7	556709	72638.8	264183	115169	24068.6	9813.84	74914	27987.4	6953.21	960869	5.45695e+06	148789	830056	155539	180809	385185	199461	228136	10562.9	192133	21067.2	1.20383e+06	51737.6	47096.5	1.79565e+06	106795	8469.56	9068.79	8594	288975	7504.59	15479.8	13705.7	81715.1	32580.9	163915	15298.7	11775.7	18313.4	24618.5	862648	431330	175762	97026	1.50501e+07	3.11446e+07
100	TITLE p4	6.78609e+06	47046.9	546116	73687.9	262742	117081	22804.7	10396.5	73888.6	28174.1	7861.03	942366	5.52212e+06	150029	835450	149292	186907	393782	200252	232298	11038.9	184538	20863.6	1.2108e+06	51173.1	48808.2	1.79633e+06	107552	9094.14	9348.21	8247.07	282755	6057.54	14401.1	14916.8	82429.7	34510.4	169992	16774.8	13548.3	18576.3	24855.8	880385	432537	174214	97732.8	1.50609e+07	3.11037e+07
101	TITLE p5	7.12024e+06	54073.4	517267	24275.3	153355	38836.8	19822.5	12752.6	60558	36994.5	6621.22	917332	1.65561e+06	160729	353066	141583	34643.8	288728	233845	32784.8	8156.48	180539	19789	1.04373e+06	27498.1	40351	937349	114521	6558.3	8371.24	7585.18	270972	3878.54	13031.9	14943.5	34698.5	33561.1	83778.5	5072.57	11311.7	6035.37	25936.6	542381	261397	198964	105543	1.30874e+07	2.83447e+07
102	TITLE p5	7.25116e+06	54127.3	514783	24460.9	152867	38949.1	19677.8	12329	61843.7	36734.5	6643.71	906270	1.67122e+06	159539	356165	141298	36800.5	294842	233279	32983.1	8786.2	181788	20463.6	1.04595e+06	29744.2	39455.3	937863	115124	6256.63	6720.8	7351.38	264986	3833.43	13225.5	14641.5	35899.4	35755.3	84789.9	4758.78	11682	5392.64	27103.5	544406	261753	198705	106755	1.30905e+07	2.82922e+07
[truncated: 22 more columns]

## Sheet: ID
intervals_name	ID	KillID	Litter	Group	Sex	volume
TITLE 1	B1	101	1	High_SE	F	500
TITLE 2	N1	102	1	High_SE	M	500
TITLE 3	O1	103	1	Low_SE	M	500
TITLE 4	F1	105	1	High_SE	F	500
TITLE 5	G1	106	1	Low_SE	F	500
TITLE 6	I1	107	1	High_SE	M	500
TITLE 7	E1	108	1	Low_SE	M	500
TITLE 8	C1	109	1	Low_SE	F	500
TITLE 9	K1	110	1	Low_CON	M	500
TITLE 10	H1	111	1	High_CON	M	250
TITLE 11	S1	112	1	Low_CON	F	500
TITLE 12	L1	113	1	High_CON	F	500
TITLE 13	N2	115	2	High_SE	M	500
TITLE 14	R2	118	2	High_SE	F	500
TITLE 15	F2	119	2	High_SE	M	500
TITLE 16	U2	121	2	Low_SE	M	500
TITLE 17	Y2	122	2	High_SE	M	500
TITLE 18	Q2	124	2	High_SE	F	500
TITLE 19	V2	127	2	Low_SE	M	500
TITLE 20	Å2	130	2	Low_SE	M	500
TITLE 21	L2	131	2	Low_CON	M	250
TITLE 22	I2	132	2	High_CON	M	500
TITLE 23	E2	133	2	Low_SE	F	500
TITLE 24	O2	134	2	Low_CON	M	500
TITLE 25	G2	135	2	High_CON	F	500
TITLE 26	D2	136	2	Low_SE	F	500
TITLE 27	Ø2	137	2	Low_CON	F	250
TITLE 28	T2	138	2	High_CON	M	500
TITLE 29	X2	139	2	Low_SE	M	500
TITLE 30	K2	141	2	Low_SE	M	500
TITLE 31	U3	142	3	Low_SE	F	500
TITLE 32	B3	143	3	High_SE	F	500
TITLE 33	T3	144	3	Low_SE	M	500
TITLE 34	D3	145	3	High_SE	M	500
TITLE 35	H3	146	3	High_SE	F	500
TITLE 36	GAMMA3	148	3	High_SE	M	500
TITLE 37	A3	150	3	High_SE	F	500
TITLE 38	J3	155	3	High_SE	M	500
TITLE 39	Y3	156	3	Low_SE	F	500
TITLE 40	O3	157	3	Low_SE	F	500
TITLE 41	V3	158	3	Low_SE	F	500
TITLE 42	N3	159	3	Low_SE	M	500
TITLE 43	R3	160	3	Low_CON	M	500
TITLE 44	K3	161	3	High_CON	F	500
TITLE 45	X3	162	3	Low_CON	F	500
TITLE 46	Æ3	163	3	High_CON	F	500
TITLE 47	G3	164	3	Low_CON	F	500
TITLE 48	Q3	165	3	High_CON	M	500
TITLE P1	pool	pool	pool	pool	pool	500
TITLE P2	pool	pool	pool	pool	pool	500
TITLE p3	pool	pool	pool	pool	pool	500
TITLE p4	pool	pool	pool	pool	pool	500
TITLE p5	pool	pool	pool	pool	pool	500

## Sheet: tRawdata
intervals_class(1=Known,2=Unk,3=bin,4=left_out)	mean_ppm	signal_to_noise	occurance	std_ppm	max_ppm_difference	mean_signal	noise	number_of_iter_align	mcr_exp_variation	ss_corr	intervals_name	Variable #	Samples Names	TITLE 1	TITLE 1	TITLE 2	TITLE 2	TITLE 3	TITLE 3	TITLE 4	TITLE 4	TITLE 5	TITLE 5	TITLE 6	TITLE 6	TITLE 7	TITLE 7	TITLE 9	TITLE 9	TITLE 11	TITLE 11	TITLE 12	TITLE 12	TITLE 13	TITLE 13	TITLE 14	TITLE 14	TITLE 15	TITLE 15	TITLE 16	TITLE 16	TITLE 17	TITLE 17	TITLE 18	TITLE 18	TITLE 19	TITLE 19	TITLE 20	TITLE 20
1	0.000670079	83.686	1	6.70725e-05	0.0001528	2.26761e+06	202185	1	99.9988	0.996405	TSP	1	0	6.60403e+06	6.72675e+06	6.44872e+06	6.57043e+06	6.74083e+06	6.82379e+06	6.81647e+06	6.92909e+06	6.73304e+06	6.83767e+06	6.80497e+06	6.90257e+06	6.51473e+06	6.6154e+06	6.82545e+06	6.93356e+06	6.8325e+06	6.91436e+06	6.52343e+06	6.62544e+06	6.65729e+06	6.77323e+06	7.58371e+06	7.69513e+06	6.30947e+06	6.41069e+06	6.54432e+06	6.6618e+06	6.8801e+06	6.97832e+06	7.6818e+06	7.77974e+06	7.49625e+06	7.61887e+06	6.56911e+06	6.66331e+06
1	0.666727	21.7007	1	0.00227825	0.00657042	4579.17	2.08261e+07	1	99.9878	0.741647	cholesterol	2	0	45137	44328.9	27726.9	26879.5	67082.8	67154.7	32362.1	28493.4	51073.6	47816.8	54331.3	54712.6	52476.2	53843.2	66724.4	69560.5	81796.8	82290.1	45246.5	45310.2	42453.4	39175.8	33771.1	31874.4	39229.7	38475.6	50316.3	51021	44846	44590.4	31377.2	32005.6	56728.6	56853.3	62644	64958.8
1	0.871327	52.4153	1	0.0166065	0.0290321	38894	2.55492e+06	5	99.8568	0.788986	LP (CH3)	3	0	539614	537145	1.17416e+06	1.16513e+06	729637	726110	589618	572690	442282	438095	353223	353393	392123	392122	554637	555950	667169	668669	314645	313982	1.1641e+06	1.16343e+06	662339	656973	861390	852945	2.30977e+06	2.31441e+06	230385	227513	377789	374755	345414	343973	462158	465625
1	0.976301	47.7423	1	0.000160878	0.000611202	9388.83	21029	1	99.9968	0.394199	leucine 1	4	0	24159.2	24277.5	195183	195351	27589	25201.8	101452	101832	26360	25173.3	12093.1	10814.2	17224.4	17249.5	25512	26064.7	23697.5	24251.6	14335	15287.4	38534.8	37414.2	35664.8	34297	51322.6	51617.8	189345	190136	13419.6	13707.7	13333.4	13490.8	16906.1	17048.1	25813.5	25671.1
1	0.989442	50.8823	1	8.37112e-05	0.000305601	39851	274905	1	99.9891	0.686555	Valine 1	5	0	154516	153798	546242	547228	217553	216363	365977	364177	231350	228216	70115.7	69362.3	148532	150355	204569	203359	180645	180741	96113.6	96492	212117	211740	181532	181067	224170	225466	577558	576840	79807.1	79096	95002.2	92792.6	139572	137750	188367	187895
1	1.01939	25.026	1	0.00594959	0.0148216	12549.9	1.10942e+07	1	99.9849	0.550477	isoleucine 1	6	0	50158	49916.7	309053	309542	65201	64458.1	153944	153833	63262.5	61824.7	15116.9	14120.9	35563.7	37227	57607.6	54959.5	48333.7	48902.8	15029.5	16155.2	78760.9	79261.9	57828.6	58095	85969.8	85572.7	327313	327882	9981.59	8763.62	16616.9	14421.9	35158.6	34696	33117.7	32159.5
1	1.05163	53.8242	1	0.00438218	0.0119184	35784.6	114140	1	99.9987	0.717546	valine 2	7	0	140101	138921	574314	574849	193319	195953	376075	376945	208215	208446	42236.4	44149.5	119723	118661	180437	182482	149082	149608	72638.3	72538.7	209400	208196	180753	179011	224479	223611	611018	612274	60519.2	61017.2	74866.6	75892.4	112576	114815	156411	156661
1	1.08265	23.3778	1	0.00523863	0.0119184	5103.28	2.29244e+06	1	99.9914	0.402375	isobutyric acid	8	0	13758.5	12589.9	29809.3	30556.2	12260.4	12377.5	33383.4	32246.7	21721.1	20226.1	21314.1	20557.4	17280.2	17116.6	28384.3	27758.2	21128.5	18728.7	19582.4	20303.9	8933.24	11164.3	24477.9	23790.5	19180.5	19355	36676.6	37543.7	19222.1	19148.6	12068.4	12260.2	15440.3	13460.1	18511.1	16834.9
1	1.13491	16.9831	1	0.0057497	0.0169609	2969.42	3.32592e+06	1	99.9779	0.259007	2-oxoisovaleric acid	9	0	10020.3	10390	8499.72	6972.35	9230.21	9644.79	12844.1	13561.7	17415.3	17437.1	11017.3	9974.07	8603.76	11693.1	13475.7	14150.1	17882.7	18777.4	10573.4	11194.4	8676.37	8471.02	13060.9	12735.5	17135.3	17322.3	8153.19	10050.4	8705.49	10252	6516.38	5592.32	7335.25	9368.6	13668.9	14308.4
1	1.15416	38.6425	1	0.0050147	0.0110016	18109.1	782367	1	99.994	0.649555	propylene glycol	10	0	28095	27668	66327.6	66394.8	41624.7	42911.1	63077.7	66368.4	58054.8	57456.6	117902	119611	59056.1	61949.7	80211.9	80931.2	79673.6	82734.3	27988.3	28830.9	178155	180169	22429.3	23859.2	20355	20167.1	65494.4	68273.3	54674	55320.7	55074.9	55445	69662.9	70093.2	72822.9	74688.7
1	1.17326	44.8026	1	9.28017e-05	0.000305601	11556.7	31050.6	1	99.9942	0.65765	2-propanol 1	11	0	37923.7	37446.3	25059.6	26181.9	20036.3	18526.9	72763	72858	22120.4	21742.9	22939.3	22807.7	21910.7	21948.9	23111.9	23958.3	5918.58	6716.66	7706.75	8054.52	100419	100007	29517.5	29859.4	31322.5	32401.7	32660.4	32883.4	10514	9997.78	11661	13317.6	19983.6	20866.5	21868.5	22661.9
1	1.17739	31.1443	1	0.000803219	0.00244481	4491.44	106351	5	99.9863	0.199163	ethanol 1	12	0	2471.57	3264.7	1412.76	3358.36	1994.01	1718.52	9397.97	8977.02	11133.7	10448.3	16600.6	16340.6	7579	8781.63	17188.9	18605.4	7177.87	7436.71	9031.81	9473.6	38980.6	39019.6	2117.08	2343.87	10227.3	9977.54	4581.24	4820.94	7347.74	6102.77	4954.29	4063.62	5309.44	5276.87	12103.2	12596
1	1.18365	45.7292	1	9.05395e-05	0.000305601	11746.6	26242.8	1	99.9952	0.62582	2-propanol 2	13	0	37918.3	37155	25541	25735.2	19334.2	18384.8	74864.5	74636.8	23216.8	22244.4	22348.1	22248.9	22085.6	23335.6	23022.8	23619.9	6182.97	7050.87	8743.81	8489.91	103717	103867	29097.8	28831.7	33681.7	34297.5	32970	34476.7	10339	9740.38	11339.6	10818	20802.9	20667.6	21901.7	23104.6
1	1.1893	31.931	1	0.00232074	0.0160441	10750.1	1.15062e+06	1	99.9467	0.600233	ethanol 2	14	0	7212.32	7953.26	16735.3	17738.7	11343.1	12481.1	39641.6	43779.2	35011.2	36524.4	47072.9	48268.9	26725.2	29727.9	54498.1	55886	30527.8	29512.9	28242.8	26037.5	120483	122600	7976.93	9836.7	40781.7	42536.3	27930.8	28406.4	24371	23986.6	19992.6	20108.9	13768.8	19218.7	46306.8	48661.7
1	1.27839	19.7526	1	0.00736059	0.0297961	110964	1.48471e+10	1	99.9257	0.601279	LP (CH2)	15	0	1.0159e+06	1.00991e+06	2.5322e+06	2.51126e+06	1.21419e+06	1.20771e+06	1.04878e+06	1.03773e+06	723361	719756	590590	590414	488068	489994	926114	928108	1.05268e+06	1.05444e+06	444675	448123	2.33224e+06	2.32426e+06	1.22613e+06	1.21881e+06	1.6823e+06	1.6696e+06	5.07316e+06	5.08907e+06	471035	467904	652476	651983	581678	585961	583511	589273
1	1.3389	47.9491	1	0.00482637	0.0116128	773888	1.61844e+08	1	99.9972	0.5286	lactate 1	16	0	1.94001e+06	1.96024e+06	1.26951e+07	1.28194e+07	948986	954498	1.20754e+07	1.21778e+07	3.00826e+06	3.04565e+06	1.65268e+06	1.66783e+06	1.84276e+06	1.85668e+06	925210	935369	1.21681e+06	1.22294e+06	1.31945e+06	1.3301e+06	5.15422e+06	5.18929e+06	2.98714e+06	3.00865e+06	4.2269e+06	4.26623e+06	1.38882e+07	1.40127e+07	3.44719e+06	3.46989e+06	2.06364e+06	2.07798e+06	1.29619e+06	1.30464e+06	287431	290232
1	1.41682	34.7613	1	0.00400918	0.0149744	19680.6	1.01021e+07	1	99.9943	0.633294	lysine	17	0	132352	129978	93989	87826.4	192016	190664	100445	96918.2	209326	207089	170757	171791	189321	193262	176820	175545	202110	199536	179530	180888	122686	121668	88538.5	86829	117224	115899	125167	121914	133627	134851	110352	109408	164247	167482	222405	223678
1	1.49109	55.8559	1	0.00343971	0.0120712	107038	624715	1	99.9987	0.655815	alanine	18	0	512418	515750	1.84831e+06	1.85713e+06	433175	435386	1.46611e+06	1.47269e+06	724254	731031	112975	113930	243861	245234	330669	334616	315490	314377	174213	176045	501102	504980	818985	821584	547904	551411	2.19752e+06	2.21325e+06	434065	435614	301037	302593	225814	227433	140168	138807
1	1.57757	30.0194	1	0.00884563	0.056689	16086.2	4.77831e+07	5	99.9922	0.541854	LP (CH2CCO) 1	19	0	204326	200473	661604	656227	199866	200983	256694	248499	85404.9	85898.3	44191.9	44859.8	41032.4	40487.9	91177.6	91263.9	101503	102281	21928.5	21601.5	646051	640546	348627	348088	442692	441420	1.31749e+06	1.31994e+06	34731.4	40281.7	149488	151124	48864.5	49273.9	59892.7	59997.7
1	1.92198	33.3297	1	7.68955e-05	0.0001528	27886.2	2.7319e+06	1	99.9945	0.351969	acetate	20	0	44151.7	45881.8	705060	722678	34739.1	35479.4	268347	273918	33720.1	35413.7	27586.4	27272.9	32941.3	33290.6	40378.6	40955.1	36145.3	36856.3	34615.8	33749.7	66956.2	69159.1	33532.1	33177.9	44561.7	45328.2	535962	552223	35986.3	36264.6	45398.2	46307.2	40291.4	40547.1	31299.7	31968.7
1	2.1466	43.8421	1	6.76779e-05	0.0001528	114878	4.4348e+06	1	99.9982	0.861178	methionine	21	0	219982	222319	528979	537848	294811	299223	457559	463845	443910	452542	102338	103726	284446	288488	452769	460575	428204	435938	173293	175902	220828	223391	314371	317408	249969	253643	757235	775747	240596	243519	174374	177872	321042	327477	330989	335663
1	2.36434	47.9524	1	0.0021549	0.0155856	29503.5	664397	1	99.9961	0.713817	glutamate	22	0	57134	57158.1	204849	206705	77506.7	75973.2	96903.9	98782.6	203632	203394	42487.2	40601.5	95131.5	95582.8	395931	401372	223470	224387	79181.8	75918.6	241987	242318	156615	156337	70767.2	73813.6	535345	539244	97516.3	97270.7	43829	43169.6	140984	141659	200870	200263
1	2.40743	45.0341	1	7.62889e-05	0.0001528	29748.3	233795	1	99.9945	0.315503	succinate	23	0	57529.3	58275.9	877447	890217	30073.6	30372.5	384595	387500	29390.8	30731.8	13424.8	14121.9	21790.9	22006.6	19153.7	19374.1	17546.7	17741.2	15105.7	14728.8	226145	229263	60732.1	62607	43157.5	43567	538414	546049	35177.4	35069.2	49460.8	49646.4	25630.4	24622.3	18764.6	18573.4
1	2.65237	46.2299	1	0.000325917	0.00229201	31092.8	547444	1	99.9928	0.872068	methionine 2	24	0	107452	108792	259065	260621	126997	127721	208450	211855	188112	189023	60990.9	60704.9	131532	132072	198532	198688	188977	189787	84541.6	84951.8	109331	113105	144854	145247	127089	130170	358387	361140	118923	118721	85735.1	87121.1	136875	135821	140844	142243
1	2.6947	15.5659	1	0.00219357	0.00397281	1873.05	3.26146e+06	1	99.7865	0.71962	aspartic acid 1	25	0	4664.53	4946.96	12487.4	14709	10518.7	11521.3	4045.65	3871.22	12302.9	11404.7	4579.98	5519.34	10700.8	10544.5	16831.1	17968.6	14752.1	14036.7	8949.4	9114.61	8363.72	8331.96	4430.66	4937	6672.84	6113.87	16603.3	16458.5	4698.97	5320.04	3594.32	3775.64	5057.88	6259.34	14024.4	15266.4
1	2.75398	39.0437	1	0.00493781	0.0102376	20876.3	6.49474e+06	1	99.9734	0.727425	LP (C=CCH2C=C)	26	0	206386	202042	477009	473169	264772	260006	212397	204275	171890	167498	128125	129861	127139	128171	172252	171865	172352	172666	149505	148296	489300	491267	246384	242602	319234	315974	907127	907766	93538.8	92546.3	130613	132276	116754	113638	137899	135349
1	3.04522	28.2271	1	0.000224755	0.00168081	9323.91	1.05273e+06	5	99.9935	0.455917	creatine 1	27	0	4250.09	3642.81	17296.1	16515.9	8340.49	9021.71	13956	13765.8	138865	136638	5486.32	5875.01	32895.6	33835.7	13481.8	13948.1	31227	31287.6	8908.14	8877.37	4544.33	5180.99	3236.46	3438.8	6359	6444.16	56920.1	58242	2638.53	3156.17	2926.33	2956.15	58659.6	56537.2	40023.3	40167.6
1	3.29123	49.6576	1	7.29013e-05	0.0001528	270327	1.32659e+07	1	99.9986	0.974668	myo-Inositol 1	28	0	1.29902e+06	1.3041e+06	1.03542e+06	1.03872e+06	945371	949247	1.04078e+06	1.04401e+06	1.10765e+06	1.11149e+06	1.21113e+06	1.21529e+06	1.02849e+06	1.03217e+06	1.28998e+06	1.29512e+06	1.07644e+06	1.07725e+06	742105	744654	1.18084e+06	1.18742e+06	1.09269e+06	1.09456e+06	983352	988468	1.58361e+06	1.59306e+06	1.11163e+06	1.11568e+06	1.16522e+06	1.16908e+06	1.17837e+06	1.18087e+06	1.17128e+06	1.17548e+06
1	3.35632	23.9465	1	0.000196977	0.000764002	7948.05	5.35663e+06	5	99.9698	0.649139	proline 1	29	0	27333.3	29114.2	94760.9	100312	33481.1	30775.1	79719	82415.6	53450.9	52597.3	18243.3	17777.8	22041.7	21794.9	37414	34901	28310.6	27051.4	18046	18111.2	38336.4	40341.2	49772.6	50974.1	38679.2	38034.9	126622	129692	26391.5	26168.8	22909.1	56772.3	25612.4	24543.4	22497.3	23752.4
1	3.36029	34.4018	1	7.52871e-05	0.0001528	15229.1	661735	1	99.9957	0.852392	methanol	30	0	72750.2	71816.1	26860.7	27481.3	33932.1	35116.6	27977.5	26813.6	30516.7	30024	43587.6	45577.6	33629.3	33618.8	64275.3	64454.7	44137.1	44956.8	34738.4	35071.6	51976.4	52387.5	62205	63076.7	43579.6	42608.5	55104	55607.2	57977.4	57645.2	76373.6	75462.6	61328.2	60855.7	64251.5	64203.9
1	3.36824	33.9918	1	8.98359e-05	0.0001528	5319.66	96496.1	1	99.9953	0.726365	proline 2	31	0	11760.5	12455.8	33907.3	33604.1	14342.5	15026.5	26202.4	27066.6	26139.8	26362.4	6960.7	8022.08	11490.5	10962.6	14270.2	14753.5	13315.5	12178.5	11895.3	11786	13182	13617.7	20721.2	21147.2	12257.5	12210.2	49784.4	51360.3	11559	11120	10588.9	9434.16	11303.7	12212.1	11479.6	10595
1	3.66987	40.4612	1	0.00238677	0.00733442	43374	3.88946e+06	1	99.9782	0.66435	isoleucine 2	32	0	161756	163172	321836	318002	148716	148340	472232	476653	240143	240444	137550	139693	109130	107143	200113	202819	170708	172837	126703	127558	239862	243197	243117	244817	255905	257247	362361	364233	173445	173919	117520	119271	121303	122093	109726	110481
1	3.89479	60.5255	1	0.000660031	0.00397281	241039	1.88759e+06	1	99.9852	0.640709	glucose 1	33	0	1.0004e+06	1.00062e+06	5.46171e+06	5.457e+06	494644	494276	3.80455e+06	3.80632e+06	638928	642116	2.60852e+06	2.60571e+06	607331	610130	751383	754467	621600	622970	804450	805859	2.49704e+06	2.48888e+06	1.02935e+06	1.02611e+06	2.38518e+06	2.38249e+06	704781	706353	844244	847040	738297	737618	632097	634992	581679	584429
1	3.93314	20.8003	1	0.000444225	0.00168081	7744.26	5.20304e+06	5	99.9768	0.370963	creatine 2	34	0	9238.99	9071.16	6592.19	7089.74	13106.2	13798.4	13297.1	12406.9	115206	116612	3645.04	4770.83	22264.2	24377.6	14914.4	15140.8	40645.1	41395.4	9390.79	9433.82	9413.35	10208.9	13144.1	12752.8	9090.01	10448.8	46286.6	47889.4	9171.23	10513.8	9061.84	9502.63	49731.2	50706.2	33891	34366.7
1	4.07586	65.5726	1	7.94326e-05	0.0001528	251286	355020	1	99.9983	0.96432	myo-Inositol 2	35	0	1.29784e+06	1.30201e+06	994590	997244	948124	948250	1.01977e+06	1.02347e+06	1.14268e+06	1.14571e+06	1.24832e+06	1.2505e+06	1.06765e+06	1.06996e+06	1.33176e+06	1.33622e+06	1.11434e+06	1.115e+06	781509	784470	1.1621e+06	1.16155e+06	1.09852e+06	1.09843e+06	1.00736e+06	1.01143e+06	1.57753e+06	1.58052e+06	1.15731e+06	1.15973e+06	1.19251e+06	1.19615e+06	1.20667e+06	1.20985e+06	1.20428e+06	1.2066e+06
1	4.12216	54.1251	1	5.0224e-05	0.0001528	142567	1.55669e+06	1	99.9961	0.572365	lactate 2	36	0	393031	402632	2.36643e+06	2.42526e+06	218659	220794	2.3215e+06	2.36557e+06	614259	627492	354672	361622	387897	395968	220879	227915	268523	273398	285004	290563	986762	1.00736e+06	580110	592991	818615	839317	2.58386e+06	2.64858e+06	699278	713845	396918	404236	280467	282691	84886.4	86684.2
1	4.22255	33.1681	1	0.00594669	0.0149744	34897.7	1.08822e+07	5	99.9973	0.50534	sucrose 1	37	0	10458.9	6696.22	12775	11761.4	9668.18	8754.4	13957.8	11134	241722	242346	231148	233414	210279	211378	218411	221115	201303	201699	213154	212020	16152.8	16945.1	18293.3	17402.1	12437.8	12458.2	16548.3	17260	233645	233883	216913	217851	186187	186536	223145	222485
1	4.90648	21.3123	1	0.000763347	0.00183361	1763.73	452169	1	99.9892	0.55176	β-mannose	38	0	4263.13	4379.01	21518.4	19086.8	5171.6	5457.96	18850.6	20226.1	2333.08	2979.98	13845.6	12220.4	5005.9	3836.89	6096.55	5544.24	3808.07	5116.44	3030.53	4795.04	15134.7	14330.4	5864.28	6964.79	10909.1	10965.1	2353.73	2002.57	4779.56	5944.56	3017.8	4682.35	3903.36	3927.69	2314.09	4173.5
1	5.191	20.378	1	0.00106835	0.00550082	1793.5	626729	1	99.9726	0.523116	α-mannose	39	0	5543.05	4370.8	24508.2	21006.7	5811.29	7247.6	20851.1	22887.7	2880.87	2886.38	16506.2	16180.1	3893.48	4244.36	6199.81	6110.21	4153.82	2692.65	4419.92	2872.41	18184.5	18273.8	6755.97	7518.01	9305.66	9633.97	5105.98	4745.15	5217.49	5509.39	3423.77	3782.82	3776.63	3421.34	2128.61	2912.48
1	5.20979	17.7516	1	0.00275023	0.014516	2222.38	5.20408e+06	5	99.9715	0.187354	LP (CHOCOR)	40	0	14502.7	14541.6	55478.1	48511.8	22441.9	22878.4	9045.03	8532.2	11183	11824.2	12544.7	11884.9	3926.6	4067.51	4258.38	5926.34	4184.07	5009.46	4537.04	5755.63	52285.8	53391.7	12978	13730	16994.4	17179.3	144767	147597	6887.85	7473.98	6056.77	5143.96	5604.56	5401.61	3515.05	3546.58
1	5.23959	57.1258	1	0.00234594	0.00626482	168404	1.53626e+06	1	99.9989	0.515339	glucose 2	41	0	643802	648519	4.33263e+06	4.36314e+06	223696	224637	2.90793e+06	2.93141e+06	57338.5	56966.7	1.85882e+06	1.87032e+06	153919	153503	269726	271594	195847	195502	387060	390263	1.84947e+06	1.86029e+06	662725	667416	1.75508e+06	1.76917e+06	346779	351822	326110	328060	329139	331434	194465	196654	141237	143025
1	5.31293	45.7181	1	0.00788119	0.0247537	28525.5	3.28587e+06	5	99.9842	0.644482	LP (CH of unsaturated lipids)	42	0	313643	312582	896362	894553	409351	406900	372400	357063	232945	232046	116527	115784	124977	128932	268765	268862	296030	292275	128955	120069	875367	872951	406124	400763	535145	529762	1.78411e+06	1.78876e+06	73462.6	71516.6	182170	181182	118765	120097	155611	157434
1	5.43746	47.7515	1	0.00386056	0.00977923	24720.5	302824	5	99.9994	0.496308	sucrose 2	43	0	2197.59	3360.75	3820.08	2264.64	2775.15	2132.29	2060.84	4011.03	223599	221700	206932	207640	190629	189657	202055	202059	179436	179067	191199	192881	3274.3	2649.57	2137.44	2071.39	2358.87	2521.63	3475.73	4623.79	215963	216589	198501	198412	167000	168714	202576	202789
1	6.52388	6.85146	1	0.00228292	0.0105432	1529.42	6.3283e+06	5	99.9015	0.432287	fumarate	44	0	4522.5	4541.74	14473.2	15477.6	3482.01	1957.12	13755.3	13765	3329.32	4622.3	2760.47	2363.8	2910.72	3738.44	3449.09	4174.04	3967.41	3476.8	3232.64	3490.34	8870.2	8985.26	5400.6	6608.15	3881.67	3712.37	13499	15448.7	4004.33	4046.39	3397.49	3863.35	3733.5	3209.04	2919.3	2878.32
1	6.87211	14.5139	1	0.00531838	0.0146688	2950.98	8.02269e+06	1	99.9817	0.536959	tyrosine 1	45	0	16646.9	17340.9	13937.6	12330.3	6076.23	5099.03	10530.6	11182.4	23767.1	24447.1	13724.3	14808.5	5202.56	5426.81	16919.2	16367.7	11077.8	12511.6	17803.3	18443.2	12134	13136	15433.4	15367.7	10460.3	10807.6	13212.9	13225.6	28660.1	29432.7	15768.8	15952.3	10015.3	9633.45	6917.99	6459.94
1	7.00734	13.8823	1	0.00383005	0.0236841	1815.24	7.80655e+06	5	99.9577	0.492385	1-methylhistidine 1	46	0	10225.7	12519.2	6540.32	5376.26	12527.5	14168.5	12525.1	12585	15361	16547.9	12031.4	13813.5	7765.67	10157.7	13383.3	15087.7	12778.2	14474.1	13189.5	12680.7	12693.4	12295	11170.2	10277.9	11232.1	13408.7	6293.6	5453.91	12980.1	12329.5	10776	12160.7	11479	13884.2	15309	15603.4
1	7.06723	26.203	1	0.000238055	0.000764002	10271	6.10847e+06	1	99.9972	0.74097	histidine 1	47	0	51583.5	52941.8	181096	182086	47488.4	48141.1	136111	137984	50607.4	51513.5	22046.2	21851.8	32669.6	32854.6	18800.2	18107.7	21716.9	22642.5	24034.6	24778.4	54906.3	53851.5	61181.3	63140	68614.8	68923.7	165924	167435	40770.3	40645.4	44820.8	44828.3	41182.1	41777.9	29355.9	29543
1	7.18275	16.1666	1	0.000305041	0.0010696	2111.86	1.57388e+06	1	99.9734	0.509676	tyrosine 2	48	0	10362.4	8744.88	7982.17	6484.37	3274.11	3269.98	8318.99	6605.56	12003	13005.3	7081.66	8243.01	4362.19	2167.61	8613.9	9864.06	5917.1	5833.07	9008.82	9014.61	5757.53	6649.53	10406.5	8339.99	4199.96	5476.35	6313.92	7575.91	15835.6	15240.6	7727.45	10277.9	5659.56	5424.24	3202.81	3351.87
1	7.19559	23.606	1	0.00050627	0.00168081	7088.01	6.6488e+06	1	99.9846	0.657422	tyramine	49	0	15068.5	14213	27430.8	29556	25008.2	26080.8	18048.6	19556.1	59348.1	59254.3	15983	14814.5	23612.1	23700.8	99326.3	100557	83804	85170.2	34547.1	36674.5	20452.2	21427.7	11814.4	13372.1	10329.1	10883.7	38068.5	38831.1	16577.6	16896.6	13399.2	13598.9	38174.9	39687.6	38273.6	36694.4
1	7.43854	28.5162	1	0.0325985	0.105127	11887.2	1.71346e+07	1	99.9926	0.746193	phenylalanine	50	0	107606	109075	357058	362831	103705	104073	266107	269658	137918	141783	49127.5	52551.8	77646.3	80600.1	78517.8	78809.3	61490.4	62660.4	52156.5	51432.8	111629	113556	150437	150888	149097	151531	351386	357099	102507	102552	75293	75808.3	71039.9	73655.3	48551.7	50288.7
1	7.67584	6.18643	1	0.000549179	0.00168081	1191.1	8.91007e+06	1	99.9488	0.37972	1-methylhistidine 2	51	0	6374.47	5702.28	6219.2	5551.45	4762.64	4795.52	8106.04	7260.58	6923.08	8145.38	6024.67	7038.1	5731.04	5202.24	6326.27	6097.56	5057.78	4256.07	6014.44	6280.1	4565.36	5525.33	5891.71	5423.42	4136.16	5220.44	6290.13	6072.38	6156.07	6987.6	6779.92	6895.5	4632.95	5268.58	5189.92	5317.23
1	7.79059	17.6219	1	0.00828825	0.0598978	9158.8	3.95723e+07	5	99.9755	0.722155	histidine 2	52	0	51183.9	51605.8	174183	175775	47128.9	48335.3	132884	134293	52123.8	51575.7	24358.6	25938.2	32555.4	32455.1	20463.4	21270	24336.1	23543.5	27201	27906.1	51790.8	50746.2	60942.9	61646.3	63916.2	64664.5	1836.26	4528.39	41990.8	42459.6	43015.6	44190.7	41325	40886.3	33356	32892.3
1	8.19307	11.8686	1	0.00162574	0.00962643	1991.73	3.67075e+06	5	99.9533	0.363203	hypoxanthine 1	53	0	4780.26	4058.19	45150.6	45605.9	5732.48	4830.97	37575.3	36794.2	4669.95	3878.13	2614.57	2966.78	6880.87	5350.85	4786.7	3002.42	4407.73	4178.75	3431.49	2959.69	8373.77	7973.02	2891.65	2117.05	2740.36	2669.92	43429.4	43343.6	2423.7	2562.87	3078.53	3354.9	5032.87	5065.34	5730.55	4955.07
1	8.21079	16.6933	1	0.00239074	0.00977923	1652.82	861489	5	99.9392	0.33286	hypoxanthine 2	54	0	3119.59	3281.18	36417.7	38344.5	3710.65	3793.81	30731.9	30758.7	3314.99	1385.51	2213.04	2288.08	2053.09	1526.9	3129.63	2327.23	2530.51	1890.28	2973.55	2292.84	6432.55	7362.64	1568.98	1909.41	2851.48	3061.24	35998.2	36203.5	2266.54	1841.78	3308.34	1455.53	5217.88	4618.04	4779.14	4889.59
1	8.46322	15.6386	1	7.47433e-05	0.0001528	3836.97	3.6531e+06	1	99.984	0.719838	formate	55	0	7509.08	8458.34	14200.2	13056.9	6504.67	7019.46	15693	16252.1	8490.34	9317.24	13002.7	14325.1	9029.13	11015.4	8469.92	9978.25	10848.7	11794.1	10323.8	12420.5	9378.16	10046.2	7379.27	7258.59	8409.08	10204.5	17463.9	16929.6	12189.3	13328.4	11127.5	12510.6	11218.2	10466.7	9774.84	9654.6
2	1.44295	27.9915	1	0.000351865	0.00259761	3768.07	193656	4	99.9878		UNK 1	56	0	6276.98	6344.44	43746.1	43304.5	3455.04	4047.99	41001.3	41896.6	12218.1	9995.59	8090.77	7374.58	5214.76	6339.41	2873.2	3006.94	3584.32	3768.54	4754.68	4505.78	17254.7	18866.4	9642.02	9389.22	13595.3	13877.9	47823.2	48306.2	12081.7	12036.4	7368.47	8004.3	5965.85	4527.67	2801.42	2581.08
2	2.44288	21.4889	1	0.00290197	0.0120712	6109.96	5.15031e+06	4	99.9513		UNK 2	57	0	11001	11312.6	14980	14335.7	24462.6	23002.5	31150.7	31897.3	32254.8	33163.6	13886.2	14256.1	18859.5	20107.6	27021.7	24814.7	28207.4	29036.1	19507.9	20091.6	23282.7	22867.7	21525.6	23357.8	14788.2	14530.9	34890.8	37551.8	21649.8	20755.7	14638	14996.5	16119	19321	26088.1	30387.9
2	3.56566	59.0162	1	0.000107056	0.000305601	202418	494885	2	99.9879		UNK 3	58	0	505978	515172	1.54366e+06	1.56569e+06	604373	612406	1.20927e+06	1.21944e+06	980416	999334	283764	287981	445920	456138	751794	762253	689743	704357	431573	437562	586465	593675	678696	684988	595996	604943	1.54634e+06	1.58171e+06	484256	489363	410543	413441	515707	527625	532162	539560
2	3.58766	40.9361	1	0.0051254	0.0108488	61654.9	6.84458e+06	2	99.9687		UNK 4	59	0	223608	222377	670826	674976	149277	149541	771860	779208	267214	268195	174836	173563	128304	131074	215877	215570	215201	218375	157285	159919	352991	355163	391036	394153	384405	383256	585868	590258	249814	249058	160900	159688	147756	145505	107032	107065
2	3.69248	38.2904	1	0.00149587	0.00565362	45477.2	9.7817e+06	4	99.993		UNK 5	60	0	32168.7	34123.4	51489	51441.2	32777.7	33951	36865.4	36926.3	409928	411759	392770	393070	361226	360100	382202	380899	337083	336258	364728	364190	35943.7	36568.9	34208.2	32266.7	30534.9	31577.1	34486.3	36684.4	392280	394177	350339	348929	301355	301639	367901	366131
2	5.00504	46.0154	1	0.00548847	0.0131408	23826.8	459417	6	99.9989		UNK 6	61	0	2290.36	2097.78	3313.64	2340.49	3354.48	3771.48	1790.93	2875.98	224207	225441	211061	210438	192739	193738	203427	205299	181269	180788	196113	196009	2881.93	2492.74	2989.63	2380.15	3000.18	1828.12	2066.42	3789.8	215689	217753	198898	198586	168148	167792	202418	201801
3	0.965147	18.0247	1	0.0118663	0.0267401	14759.8	1.13227e+08	0	0		bin-isoleucine-leucine	62	0	1.17321e+07	1.17327e+07	1.71464e+07	1.71946e+07	1.62012e+07	1.61901e+07	1.35493e+07	1.36152e+07	1.60016e+07	1.59788e+07	1.22317e+07	1.22017e+07	1.36742e+07	1.37065e+07	1.51007e+07	1.51263e+07	1.63826e+07	1.63762e+07	1.27427e+07	1.27447e+07	1.30639e+07	1.30415e+07	1.04648e+07	1.04605e+07	1.42045e+07	1.42174e+07	2.06839e+07	2.07557e+07	9.99857e+06	9.97381e+06	8.82525e+06	8.82796e+06	1.17759e+07	1.17781e+07	1.54064e+07	1.53954e+07
3	1.71922	31.7288	1	0.00047386	0.001528	19956.7	3.69406e+07	0	0		bin-arginine-lysine	63	0	2.51994e+07	2.51536e+07	2.89521e+07	2.90028e+07	3.59473e+07	3.59046e+07	2.69e+07	2.69033e+07	3.53059e+07	3.52499e+07	2.8621e+07	2.85725e+07	3.11983e+07	3.11828e+07	3.36729e+07	3.3686e+07	3.64189e+07	3.6407e+07	2.92132e+07	2.92265e+07	2.59867e+07	2.59023e+07	22647046	2.26241e+07	2.92205e+07	2.91798e+07	3.609e+07	3.62007e+07	2.33064e+07	2.32863e+07	1.87761e+07	1.8708e+07	2.66814e+07	2.66765e+07	3.40704e+07	3.40621e+07
3	2.04697	45.4094	1	0.000499709	0.00168081	273800	1.16161e+08	0	0		bin-glycoprotein (acetyls)-proline-glutamic acid	64	0	5.79605e+07	5.78842e+07	7.19566e+07	7.20363e+07	7.75045e+07	7.74852e+07	5.98577e+07	5.99783e+07	7.2627e+07	7.25437e+07	5.83759e+07	5.83535e+07	6.04641e+07	6.04633e+07	7.31227e+07	7.32252e+07	7.60964e+07	7.61008e+07	5.91642e+07	5.9201e+07	7.38073e+07	7.36508e+07	5.75672e+07	5.74952e+07	7.39694e+07	7.39751e+07	1.11275e+08	1.11649e+08	4.65113e+07	4.64997e+07	43427691	4.34074e+07	5.32496e+07	5.32675e+07	6.69946e+07	6.70307e+07
3	2.24164	18.761	1	0.014749	0.0369777	19969.4	4.89767e+08	0	0		bin-lipid-valine-acetoacetate	65	0	1.24962e+07	1.24572e+07	2.20727e+07	2.20636e+07	1.51456e+07	1.51281e+07	1.41084e+07	1.40527e+07	1.34694e+07	1.34241e+07	8.6455e+06	8.62358e+06	9.64759e+06	9.67252e+06	1.29429e+07	1.29544e+07	1.30264e+07	1.30105e+07	9.18768e+06	9.21065e+06	2.16641e+07	2.15579e+07	1.49991e+07	1.49574e+07	1.91615e+07	1.91285e+07	3.66905e+07	3.67824e+07	7.315e+06	7.30667e+06	9.45734e+06	9.43288e+06	8.18266e+06	8.16435e+06	1.03389e+07	1.03468e+07
3	2.37672	30.337	1	0.000424823	0.0013752	18236.4	3.12276e+06	0	0		bin-glutamate-pyruvate	66	0	766050	770478	963782	970741	952912	951345	927310	934097	1.23315e+06	1.23643e+06	908549	913865	920369	928755	1.48832e+06	1.49091e+06	1.25841e+06	1.26473e+06	913309	921673	1.07496e+06	1.073e+06	917243	918887	1.04445e+06	1.06203e+06	1.87067e+06	1.88096e+06	998255	1.00503e+06	641482	647789	851089	858075	1.16707e+06	1.16687e+06
3	2.56588	72.0414	1	0.000366389	0.000916803	309136	127672	0	0		EDTA (Ca)	67	0	1.39994e+07	1.39824e+07	1.57014e+07	1.5703e+07	1.37034e+07	1.36927e+07	1.62138e+07	1.62582e+07	1.44916e+07	1.44607e+07	1.44873e+07	1.44723e+07	1.28153e+07	1.28065e+07	1.407e+07	1.4084e+07	1.39641e+07	1.39341e+07	1.29134e+07	1.29165e+07	1.50635e+07	1.50382e+07	1.22377e+07	1.22085e+07	1.40843e+07	1.40746e+07	1.66263e+07	1.66445e+07	1.35304e+07	1.35319e+07	1.09717e+07	1.09605e+07	1.17261e+07	1.17178e+07	1.40254e+07	1.40143e+07
3	2.67407	24.4535	1	0.0024073	0.00809843	4992.28	2.02361e+06	0	0		bin-aspartic acid-citritate	68	0	1.51639e+06	1.51135e+06	1.53748e+06	1.53202e+06	2.00798e+06	2.00635e+06	1.54369e+06	1.56049e+06	2.02036e+06	2.0266e+06	1.64428e+06	1.64659e+06	1.7326e+06	1.73191e+06	1.95653e+06	1.96705e+06	2.0535e+06	2.05763e+06	1.67836e+06	1.67899e+06	1.51768e+06	1.51049e+06	1.34235e+06	1.35098e+06	1.77172e+06	1.77299e+06	1.92094e+06	1.93113e+06	1.46358e+06	1.45994e+06	1.0904e+06	1.09268e+06	1.50066e+06	1.5034e+06	1.88338e+06	1.88229e+06
3	2.70677	60.7783	1	0.000350454	0.000916803	91303.3	148156	0	0		EDTA (Mg)	69	0	6.58919e+06	6.58882e+06	7.33242e+06	7.34485e+06	6.74433e+06	6.73075e+06	8.09122e+06	8.14194e+06	6.72555e+06	6726479	5.89697e+06	5.89561e+06	6.20334e+06	6.19846e+06	6.09133e+06	6.09823e+06	6.38358e+06	6.37643e+06	5.28127e+06	5.2837e+06	6.70598e+06	6.69251e+06	5.0921e+06	5.08526e+06	5.99303e+06	5.99918e+06	8.49841e+06	8.52413e+06	5.97005e+06	5.95801e+06	5.11793e+06	5.11886e+06	5.1349e+06	5.11945e+06	5.56197e+06	5.55868e+06
3	2.80074	17.4379	1	0.0243884	0.0708994	3407.73	1.48965e+07	0	0		bin-asparagine-aspartic acid	70	0	3.64327e+06	3.6381e+06	3.97609e+06	3.99744e+06	4.92576e+06	4.92793e+06	3.62766e+06	3.64989e+06	4.82132e+06	4.80567e+06	3.74599e+06	3.75539e+06	4.08982e+06	4.10958e+06	5.01234e+06	5.00288e+06	5.3578e+06	5.33079e+06	3.9132e+06	3.90567e+06	4.01876e+06	4.02426e+06	3.32515e+06	3352459	4.30077e+06	4.33283e+06	5.22647e+06	5.2462e+06	3.26748e+06	3.26836e+06	2.74833e+06	2.72945e+06	3.50331e+06	3.49465e+06	4.52182e+06	4.51795e+06
3	2.92986	19.2588	1	0.000909781	0.00305601	7793.1	1.43836e+07	0	0		bin-dimethylglycine-asparagine	71	0	2.83716e+06	2.83807e+06	2.39372e+06	2.38064e+06	3.85598e+06	3.83436e+06	2.52735e+06	2.54894e+06	3.90018e+06	3.88134e+06	3.16046e+06	3.16775e+06	3.45022e+06	3.44439e+06	3.59614e+06	3.61688e+06	3.84251e+06	3.82839e+06	3.20112e+06	3.19064e+06	2.78258e+06	2.8003e+06	2.44937e+06	2.44455e+06	3.08343e+06	3.09825e+06	3.1349e+06	3.15889e+06	2.74989e+06	2.75797e+06	2.30883e+06	2289019	3.04581e+06	3.04162e+06	3.79871e+06	3.81455e+06
3	3.02566	24.9503	1	0.0127321	0.0206281	8489.15	1.89642e+07	0	0		bin-lysine-tyrosine-cysteine	72	0	5.01431e+06	5.01101e+06	6.37229e+06	6.32475e+06	7.05122e+06	7.07255e+06	5.73446e+06	5.7569e+06	7.80253e+06	7.81345e+06	5.6515e+06	5.64659e+06	6.25685e+06	6.2516e+06	6.88762e+06	6.8986e+06	7.20626e+06	7.2041e+06	5.92807e+06	5.90555e+06	5.21952e+06	5.2052e+06	4.60661e+06	4.61623e+06	5.56181e+06	5.56957e+06	7.50336e+06	7.52463e+06	4.73436e+06	4.71135e+06	3.77857e+06	3.76235e+06	5.26111e+06	5.26052e+06	6.71826e+06	6.71188e+06
3	3.04889	28.6916	1	0.000808645	0.00320881	13177.5	5.61147e+06	0	0		bin-lysine-tyrosine	73	0	2.3994e+06	2.39177e+06	3.33272e+06	3.35296e+06	3.28947e+06	3.28495e+06	3.27317e+06	3.29434e+06	3.88431e+06	3.8899e+06	2.55814e+06	2.55995e+06	2.81447e+06	2.83073e+06	3.31101e+06	3.32622e+06	3.33836e+06	3.32304e+06	2.58594e+06	2.58434e+06	2.57785e+06	2.55719e+06	2.17917e+06	2.16649e+06	2.51806e+06	2.5233e+06	3.93719e+06	3.96609e+06	2.1499e+06	2.16331e+06	1.80603e+06	1.80046e+06	2.43266e+06	2.44289e+06	3.06939e+06	3.07457e+06
3	3.14393	52.0202	1	0.0126763	0.0267401	139860	7.80287e+06	0	0		EDTA (Ca)	74	0	2.36001e+07	2.35618e+07	2.90817e+07	2.90189e+07	2.3248e+07	2.32271e+07	2.8897e+07	2.89385e+07	2.47861e+07	2.47409e+07	2.40185e+07	2.40007e+07	2.15804e+07	2.1562e+07	2.32184e+07	2.323e+07	2.29723e+07	2.29365e+07	2.14464e+07	2.14156e+07	2.57337e+07	2.56804e+07	2.09285e+07	2.08782e+07	2.40333e+07	2.40422e+07	3.00015e+07	3.00454e+07	2.25724e+07	2.25397e+07	1.85809e+07	1.8531e+07	1.98614e+07	1.98458e+07	2.36531e+07	2.36618e+07
3	3.21758	33.4884	1	0.00516949	0.0166553	324528	2.15487e+09	0	0		bin-choline-L-acetylcarnitine	75	0	2.48278e+07	2.47728e+07	1.65627e+07	1.63624e+07	3.58777e+07	3.58549e+07	2.2702e+07	2.26929e+07	2.77783e+07	2.77349e+07	3.65237e+07	3.64998e+07	3.56263e+07	3.55782e+07	2.44322e+07	2.44478e+07	4.06811e+07	4.06529e+07	3.32789e+07	3.32619e+07	3.9172e+07	3.90302e+07	2.20604e+07	2.20047e+07	3.49429e+07	3.49311e+07	1.61332e+07	1.61874e+07	2.90767e+07	2.90827e+07	5.30252e+07	5.29525e+07	4.20657e+07	4.20468e+07	4.16744e+07	4.16097e+07
3	3.26724	45.5785	1	0.00189889	0.012988	327002	8.6924e+07	0	0		bin-β-glucose-taurine	76	0	2.11368e+07	2.12435e+07	8.26332e+07	8.32326e+07	1.49782e+07	1.50127e+07	6.09183e+07	6.13729e+07	1.9499e+07	1.95631e+07	3.60835e+07	3.62382e+07	1.5642e+07	1.57278e+07	1.77238e+07	1.78181e+07	1.60193e+07	1.60551e+07	1.34185e+07	1.34607e+07	3.91872e+07	3.93654e+07	2.00879e+07	2.01607e+07	3.82629e+07	3.85115e+07	4.14615e+07	4.16225e+07	1.89644e+07	1.90427e+07	1.49345e+07	1.50439e+07	1.60736e+07	1.61777e+07	1.41435e+07	1.41907e+07
3	3.42905	65.5036	1	0.000414322	0.0013752	248296	599485	0	0		bin-β-glucose-taurine 2	77	0	1.6963e+07	1.69924e+07	1.01837e+08	1.02258e+08	7.77629e+06	7.79646e+06	6.81458e+07	6.85978e+07	4.56815e+06	4.58237e+06	4.36476e+07	4.38271e+07	5.94375e+06	5.95291e+06	8.83481e+06	8.87815e+06	7.18952e+06	7.2188e+06	1.08199e+07	1.08485e+07	4.39743e+07	4.40669e+07	1.74109e+07	1.74926e+07	4.27294e+07	4.2972e+07	1.23872e+07	1.24584e+07	9.75784e+06	9.78756e+06	9.4213e+06	9.45464e+06	6.70103e+06	6.75769e+06	5.9424e+06	5958279
3	3.4998	46.7508	1	0.000448412	0.001528	299412	5.97967e+07	0	0		bin-glucose	78	0	2.34884e+07	2.35619e+07	1.34942e+08	1.35346e+08	1.11422e+07	1.11753e+07	9.11225e+07	9.15909e+07	6.59533e+06	6.61241e+06	5.9477e+07	5.96572e+07	8.80742e+06	8.77201e+06	1.25183e+07	1.25866e+07	1.05561e+07	1.06176e+07	1.56607e+07	1.56706e+07	5.95171e+07	5.96464e+07	2.34952e+07	2.35532e+07	5.76891e+07	5.7902e+07	1.58489e+07	1.59351e+07	1.36471e+07	1.36616e+07	1.37593e+07	1.37515e+07	9.55831e+06	9.56834e+06	8.95515e+06	8.99979e+06
3	3.54839	57.723	1	0.00240762	0.00611202	340322	8.28121e+06	0	0		bin-a-glucose-myo-Inositol	79	0	3.31313e+07	3.31565e+07	59472868	5.96776e+07	2.37531e+07	2.37982e+07	4.78034e+07	4.80265e+07	2.73871e+07	2.73938e+07	4.33282e+07	4.34193e+07	2.577e+07	2.57553e+07	3.20157e+07	3.21211e+07	2.72993e+07	2.7327e+07	2.21877e+07	2.22093e+07	4.11398e+07	4.11682e+07	2.93028e+07	2.93601e+07	3.7895e+07	3.8025e+07	3.69564e+07	3.71176e+07	2.85074e+07	2.85725e+07	2.85343e+07	2.85547e+07	2.77806e+07	2.78385e+07	2.81604e+07	2.81885e+07
3	3.61593	40.7309	1	0.00248627	0.00672322	856564	2.51239e+09	0	0		EDTA	80	0	4.17952e+07	41791493	2.38202e+07	2.36181e+07	6.17401e+07	6.17452e+07	3.20719e+07	3.2088e+07	4.82146e+07	4.81887e+07	6.47396e+07	6.46935e+07	6.11289e+07	6.11591e+07	4.03839e+07	4.0461e+07	6.90786e+07	6.9005e+07	5.85616e+07	5.85708e+07	6.932e+07	6.91567e+07	3.86535e+07	3.85977e+07	6.37414e+07	6.37356e+07	2.33214e+07	2.33884e+07	4.99721e+07	4.9976e+07	1.01066e+08	1.00995e+08	7.66448e+07	7.66118e+07	7.63525e+07	7.63128e+07
3	3.63518	48.6046	1	0.000393989	0.0010696	419514	4.74325e+07	0	0		bin-myo-Inositol	81	0	2.42988e+07	2.43858e+07	2.83181e+07	2.85763e+07	2.11795e+07	2.11707e+07	2.69976e+07	2.71824e+07	2.35936e+07	2.36757e+07	2.43368e+07	2.44032e+07	2.1344e+07	2.13811e+07	2.55962e+07	2.57421e+07	2.32017e+07	2.32497e+07	1.75765e+07	1.76565e+07	2.4266e+07	2.43518e+07	2.1766e+07	2.18269e+07	2.30607e+07	2.31186e+07	5.84602e+07	58684832	2.22844e+07	2.23373e+07	2.18922e+07	2.20738e+07	2.28718e+07	2.29604e+07	2.39551e+07	2.40493e+07
3	3.7397	23.3086	1	0.0146786	0.048285	229413	1.26064e+10	0	0		bin-glucose-mannose-galactose-lysine	82	0	4.95321e+07	4.95412e+07	1.68419e+08	1.68627e+08	4.26839e+07	4.27039e+07	1.24257e+08	1.2471e+08	4.82427e+07	4.82072e+07	9.70087e+07	9.70016e+07	4.40354e+07	4.40058e+07	5.34775e+07	5.35713e+07	5.04426e+07	5.04076e+07	5.11439e+07	5.12046e+07	8.79622e+07	8.79154e+07	4.82804e+07	4.83015e+07	8.72361e+07	8.73395e+07	5.3185e+07	5.34644e+07	4.49629e+07	4.4989e+07	4.05888e+07	4.06125e+07	4.01321e+07	4.01248e+07	4.69073e+07	4.69013e+07
3	3.84192	29.7591	1	0.0103942	0.0449233	171673	1.3414e+09	0	0		bin-mannose-galactose	83	0	3.55585e+07	3.55643e+07	1.05088e+08	1.0541e+08	3.4116e+07	3.4115e+07	8.04035e+07	8.07331e+07	3.54563e+07	3.54701e+07	6.37302e+07	6.37295e+07	3.35389e+07	3.35822e+07	3.81427e+07	3.82397e+07	3.74475e+07	3.74236e+07	3.74734e+07	3.75581e+07	5.74947e+07	5.74498e+07	3.42105e+07	3.4253e+07	5.83021e+07	5.84059e+07	3.65114e+07	3.6694e+07	3.25187e+07	3.25487e+07	2.79034e+07	2.79715e+07	2.98633e+07	2.98689e+07	3.47146e+07	3.4724e+07
3	4.05859	22.5679	1	0.0294942	0.079609	28696.3	5.88329e+08	0	0		bin-mannose-galactose-sucrose-tyrosine-asparagine	84	0	1.81261e+07	1.81003e+07	2.19954e+07	2.21114e+07	2.15313e+07	2.15466e+07	2.2274e+07	2.23518e+07	2.77164e+07	2.77021e+07	2.65195e+07	2.65005e+07	2.47184e+07	2.47283e+07	2.63476e+07	2.63803e+07	2.66285e+07	2.65984e+07	2.50154e+07	2.50247e+07	1.97359e+07	1.97117e+07	1.67017e+07	1.67139e+07	2.10364e+07	2.1026e+07	2.19147e+07	2.20135e+07	2.26175e+07	2.26169e+07	1.89091e+07	1.89322e+07	2.15305e+07	2.15319e+07	2.63261e+07	2.6334e+07
3	4.269	19.6097	1	0.0238509	0.054397	6440.58	1.24087e+08	0	0		bin-LP (CH2OCOR)-threonine	85	0	1.03462e+07	1.03359e+07	1.39153e+07	1.39889e+07	1.32178e+07	1.32011e+07	1.13422e+07	1.13671e+07	1.26559e+07	1.26267e+07	1.04211e+07	1.03937e+07	1.08312e+07	1.08312e+07	1.18867e+07	1.18697e+07	1.27372e+07	1.27381e+07	1.03919e+07	1.04624e+07	1.34269e+07	1.34068e+07	1.04569e+07	1.04444e+07	1.31302e+07	1.30635e+07	1.9072e+07	1.91225e+07	8.39476e+06	8.43373e+06	7.90525e+06	7.94838e+06	9.14414e+06	9.11984e+06	1.17753e+07	1.17755e+07
3	6.91321	21.4739	1	0.00532427	0.0146688	6005.83	8.48415e+06	0	0		bin-tyrosine-tyramine	86	0	1.04601e+06	1.06747e+06	983312	1.00017e+06	1.72343e+06	1.73165e+06	1.04998e+06	1.04567e+06	2.04195e+06	2.02504e+06	1.31397e+06	1.3454e+06	1.57205e+06	1.57464e+06	2.39393e+06	2.41061e+06	2.35604e+06	2.37929e+06	1.61387e+06	1.62578e+06	1.12414e+06	1.1338e+06	859251	849882	1.11279e+06	1.10909e+06	1.37749e+06	1.39346e+06	1.03292e+06	1.037e+06	822521	812201	1.51273e+06	1.53204e+06	1.83014e+06	1.8407e+06
[truncated: 66 more columns]
