# Supplementary material for: Altered hepatic metabolism mediates sepsis preventive effects of reduced glucose supply in infected preterm newborns
Source: eLife. 2025 Feb 24;13:RP97830. doi: 10.7554/eLife.97830 (PMC11850001; doi:10.7554/eLife.97830)
Supplement: Figure 5—source data 1. [file elife-97830-fig5-data1.xlsx]

## Sheet: overview
plasma proteome
Table 1	DEPs between High_SE vs High_control at 12hours
Table 2	DEPs between low_control vs High_control at 12hours
Table 3	DEPs between High_SE vs Low_SE at 12hours
Table 4	DEPs between Low_SE VS Low_control at 12hours
Table 5	DEPs between High_SE VS High_control at 22hours
Table 6	DEPs between low_control vs High_control at 22hours
Table 7	DEPs between High_SE vs Low_SE at 22hours
Table 8	DEPs between Low_SE VS Low_control at 22hours

## Sheet: 12h_High_SEvsHigh_CON
Accession ID	Gene ID	Protein Name	Protein Description	rawP	adjp	log2FC	HIGH_CON	HIGH_CON	HIGH_CON	HIGH_CON	HIGH_CON	HIGH_CON	HIGH_SE	HIGH_SE	HIGH_SE	HIGH_SE	HIGH_SE	HIGH_SE	LOW_CON	LOW_CON	LOW_CON	LOW_CON	LOW_CON	LOW_CON	LOW_SE	LOW_SE	LOW_SE	LOW_SE	LOW_SE	LOW_SE
F1SCC7	LOC396684	F1SCC7_PIG	SERPIN domain-containing protein	0	0	1.41265	20.6341	20.4938	20.6618	20.5395	20.2238	21.1501	21.9668	21.7451	21.971	22.4455	21.8747	22.1759	20.7206	20.8835	19.7971	21.122	20.4341	20.2626	22.1982	22.341	22.6927	22.3293	21.9582	22.1525
A0A5S6HM44;Q8SPS7	HP	A0A5S6HM44_PIG;HPT_PIG	Haptoglobin	4.92939e-12	0	2.61694	19.7719	17.6183	18.6835	18.4046	18.3115	20.1801	20.8623	22.1451	21.6702	22.1871	20.2716	21.5354	21.2338	19.5738	19.7373	21.3209	20.4315	20.0251	22.3094	21.9958	22.6981	22.5007	22.2207	22.1373
P14287	SPP1	OSTP_PIG	Osteopontin	2.81175e-12	0	1.02884	18.9897	18.4138	18.1699	17.7032	18.2447	18.1799	19.5846	19.0014	19.1318	19.1335	19.7069	19.316	18.1509	18.4799	18.1791	17.9005	18.7114	17.9788	18.3223	18.64	18.8163	18.414	18.4366	18.2719
A0A286ZIU5;A0A287ARJ8;F1SCC6	SERPINA3-2	A0A286ZIU5_PIG;A0A287ARJ8_PIG;F1SCC6_PIG	SERPIN domain-containing protein	3.88578e-14	0	3.26397	17.2784	17.4144	18.6547	16.371	18.5128	18.3724	21.6311	21.3394	19.8912	21.5598	20.782	20.9841	16.7637	17.992	16.5262	18.048	15.2896	18.7067	21.0307	21.0801	21.6745	21.5729	20.7248	20.4525
A0A5G2QKI1;Q8MJ39	MGP	A0A5G2QKI1_PIG;MGP_PIG	Matrix Gla protein	0	0	1.51499	18.4215	18.3704	18.2237	17.9555	17.9824	18.1678	19.8921	19.5982	20.0348	19.5617	19.814	19.3103	18.1826	17.957	17.9383	17.7582	18.1293	17.785	19.0567	19.3257	18.8466	19.0899	18.9597	18.7904
I3LVL5	CRISP3	I3LVL5_PIG	Cysteine rich secretory protein 3	5.81757e-14	0	0.895424	16.8723	17.2615	16.9371	17.2611	16.9785	16.7444	18.1934	17.5982	17.931	17.6107	17.9476	18.1466	16.9767	17.0131	16.9583	16.6631	17.0574	17.0738	17.1401	17.2978	17.5602	17.7663	17.4687	17.0735
A0A287BEY3	LOC100624077	A0A287BEY3_PIG	Endogenous retrovirus group V member 2 Env polyprotein	8.88178e-16	0	-1.03252	17.1642	17.2117	16.7008	17.1749	16.8532	17.0825	16.1303	16.3387	15.8689	15.2927	16.1731	16.1884	17.8098	17.3888	17.4363	17.3091	17.6254	17.5367	16.4458	16.4084	16.2754	15.9783	16.352	15.9848
F1S567	VCAM1	F1S567_PIG	Uncharacterized protein	1.5938e-09	0	0.703826	16.9208	16.969	16.9588	16.5987	16.5535	16.7031	17.4327	17.3752	17.3289	17.6458	17.6792	17.4651	16.7101	16.6081	16.7994	16.3168	17.3742	16.7086	16.9018	17.1094	17.3044	17.2348	17.1899	17.1493
A0A287BBJ9	PCSK9	A0A287BBJ9_PIG	Proprotein convertase subtilisin/kexin type 9	4.07717e-11	0	-1.32882	16.6074	15.6935	16.6132	16.344	16.4041	16.2687	14.6824	15.3376	14.2628	15.2238	15.264	15.1873	16.327	16.8218	16.772	16.9383	17.0364	16.2489	15.6001	15.063	15.2947	15.5981	14.7849	14.6789
A0A286ZVN0	LOC106504547	A0A286ZVN0_PIG	SERPIN domain-containing protein	8.12203e-11	0	3.5245	16.1707	16.3764	15.9349	17.6793	15.8145	18.73	20.8854	20.7598	19.1926	20.225	19.6484	21.1415	16.1003	18.1351	13.3584	17.3446	15.7219	15.4221	20.5671	20.794	21.9038	21.5748	21.3566	20.2718
F1RWV2;P35624	TIMP1	F1RWV2_PIG;TIMP1_PIG	Metalloproteinase inhibitor 1	2.39134e-08	0	1.21815	16.1842	15.6968	16.1187	16.1719	15.907	16.4331	17.1738	17.1429	18.1757	17.1656	17.9393	16.223	15.028	15.4073	15.9274	15.63	15.5942	15.8687	16.6596	16.7362	16.3239	17.0277	16.3172	16.2692
P04404	CHGA	CMGA_PIG	Chromogranin-A (Fragment)	0	0	1.87091	15.6488	15.6835	15.8098	15.375	15.7945	15.1036	17.3752	18.3451	17.288	17.271	17.3659	16.9955	15.3038	15.6543	15.7531	15.5925	16.026	16.0347	15.987	16.7349	16.2713	17.5237	17.0885	16.1085
A0A287BJ65;F1RRX1	LCN2	A0A287BJ65_PIG;F1RRX1_PIG	Lipocln_cytosolic_FA-bd_dom domain-containing protein	8.88178e-16	0	1.2263	15.4122	15.4802	15.537	15.6314	15.4355	15.8423	16.6492	16.1997	16.979	16.7486	17.1635	16.9564	15.0519	15.6809	15.3407	14.926	15.7342	15.4176	15.9525	16.6343	16.874	16.6359	16.2797	16.1848
F1RWA3;G9K122;K7GPB4	MRC1	F1RWA3_PIG;G9K122_PIG;K7GPB4_PIG	Uncharacterized protein;Macrophage mannose receptor 1;Uncharacterized protein	2.62013e-14	0	0.867084	15.6498	15.5634	15.0372	15.1393	15.0634	15.4302	16.007	16.1456	16.65	15.9407	16.3415	16.0009	15.2701	15.0863	14.8912	15.1766	15.6071	15.1051	15.3992	15.9705	15.9334	15.8522	16.0152	16.0112
A0A5G2QN51;I3LC80	SEMA7A	A0A5G2QN51_PIG;I3LC80_PIG	Semaphorin 7A (John Milton Hagen blood group)	7.1704e-08	0	0.654424	15.6408	15.0546	14.8632	14.7938	14.7581	15.0809	15.601	15.7801	15.8237	15.3695	16.0723	15.4712	14.2179	14.9955	14.873	14.3786	14.5885	14.2549	14.6045	14.762	14.9783	14.9767	14.9438	14.9
A0A286ZYQ4	LCP1	A0A286ZYQ4_PIG	Lymphocyte cytosolic protein 1	1.88178e-10	0	1.33606	14.48	15.3734	14.6827	15.1144	14.889	15.4457	15.9984	17.3186	16.6346	15.8857	16.3836	15.7809	15.0423	14.4144	15.3446	15.1757	15.1681	14.9843	15.376	16.0391	15.5155	15.7115	15.9311	15.5908
A0A480KNV0;A0A5G2QFI9;Q2HXZ9	SAA3	A0A480KNV0_PIG;A0A5G2QFI9_PIG;Q2HXZ9_PIG	Serum amyloid A protein	0	0	3.60872	14.2838	10.5628	15.4292	13.0693	14.3941	13.6291	17.366	16.9756	17.9598	17.3829	17.6341	15.7023	15.051	14.6071	14.8209	14.9182	15.11	15.1674	15.7732	17.4208	17.8986	17.3471	16.414	16.5726
A0A5G2Q6W7;F1S3J9	ICAM1	A0A5G2Q6W7_PIG;F1S3J9_PIG	Uncharacterized protein;Intercellular adhesion molecule 1	1.47732e-10	0	0.835421	14.3454	14.6018	14.5547	14.0303	14.5463	14.1577	15.4648	15.3232	15.2548	15.3497	14.9957	14.8605	14.0695	14.0214	14.5546	14.5081	14.4089	14.1188	15.0027	14.9231	14.5864	15.0746	14.641	14.4422
A0A287BPW3;P32196	LOC102159373;NPG3	A0A287BPW3_PIG;PG3_PIG	Uncharacterized protein;Protegrin-3	0	0	3.9224	13.71	14.6204	13.9904	13.7721	13.7085	14.6257	18.0545	17.4219	18.3486	17.8038	18.4729	17.8598	14.3545	13.6258	14.407	15.0699	14.661	13.5294	17.4224	17.5616	17.9198	17.9766	17.3588	16.7784
F1SJM0	PTX3	F1SJM0_PIG	Pentraxin-3	1.06048e-07	0	1.54224	14.1609	14.4653	14.0478	14.4633	13.9927	13.7478	14.9583	15.771	16.5278	15.9933	16.6237	14.2572	14.2854	13.9883	14.3539	13.7298	14.1325	14.1343	14.1754	14.7769	14.4975	14.074	13.5726	13.4823
A0A5G2QW05;F1SKB1;K7GKN3;K7GMZ8	CP	A0A5G2QW05_PIG;F1SKB1_PIG;K7GKN3_PIG;K7GMZ8_PIG	Ceruloplasmin	3.60691e-11	0	2.20969	13.0195	14.0086	12.6397	13.8701	13.6941	15.1904	16.4915	16.0065	16.0736	15.9648	15.3287	15.8153	13.1099	12.4862	13.0769	13.3737	13.1855	12.6665	15.0116	14.8357	16.5415	16.2934	15.2218	14.8745
Q6QR67	RETN	Q6QR67_PIG	Resistin	0	0	2.88992	14.4165	12.6506	13.1463	13.5178	13.2273	12.7652	16.3114	16.0126	16.2769	16.0689	16.6883	15.7051	11.6435	14.1942	12.6108	12.5151	12.9346	13.1577	15.0177	16.0727	15.4861	16.211	15.4544	14.8616
A0A5G2R5F2;F1SD66	CHGA	A0A5G2R5F2_PIG;F1SD66_PIG	Chromogranin-A	1.33227e-15	0	2.45486	12.7816	12.6104	11.5834	12.3706	12.4814	13.1343	15.1264	15.8131	14.8171	14.9273	14.4994	14.5077	11.9592	12.8957	12.8072	13.4609	13.4946	13.252	13.3754	14.639	13.346	14.9442	14.5311	14.6728
P51525	NA	PF12_PIG	Prophenin-2	1.11022e-16	0	2.46074	13.1736	12.981	12.4626	12.484	11.7812	12.4023	14.9592	14.7739	15.2795	14.7125	15.8448	14.4793	11.785	13.3912	11.8115	13.4633	11.2585	10.9168	13.443	13.9497	14.5061	14.6957	13.865	13.8052
P12067;P12068;P12069	NA	LYSC1_PIG;LYSC2_PIG;LYSC3_PIG	Lysozyme C-1;Lysozyme C-2;Lysozyme C-3	6.39528e-10	0	1.92439	11.4988	11.7031	12.1784	12.6861	12.7018	11.4407	14.6875	13.8695	13.7801	13.3882	14.6926	13.3374	12.7934	11.6277	13.2751	12.9758	12.1149	13.0863	13.6504	13.7903	13.5484	14.3552	12.8217	13.4374
Q29056	IL1RN	IL1RA_PIG	Interleukin-1 receptor antagonist protein	0	0	4.67136	12.3123	9.762	12.6299	10.9753	11.4426	10.7916	13.8969	17.4586	16.8138	15.2877	17.067	15.4178	9.91533	9.79857	11.4603	10.9463	9.98964	9.47443	14.0381	16.417	15.1865	17.4175	16.415	16.1052
F2Z5B1;P80229	SERPINB1	F2Z5B1_PIG;ILEU_PIG	Leukocyte elastase inhibitor	1.24759e-08	0	1.66643	11.4873	12.4616	12.3506	12.2096	12.626	12.4483	13.7358	14.4461	13.9401	13.7038	14.3927	13.3635	12.2654	11.6088	13.1233	13.7692	12.9683	12.814	13.7736	13.9821	14.0186	13.0794	13.3573	12.7492
A0A286ZTY5	CFAP99	A0A286ZTY5_PIG	Cilia and flagella associated protein 99	0	0	4.23614	10.8501	10.0049	12.2034	12.3497	11.4599	13.8488	16.2689	16.1065	15.2134	16.8208	15.3191	16.4049	12.1188	10.1909	10.9474	13.222	11.7291	10.6564	16.1805	16.5852	15.518	17.131	16.875	16.2453
A0A287BPH0;P00998	SPINK1	A0A287BPH0_PIG;ISK1_PIG	Serine protease inhibitor Kazal-type 1	4.56178e-09	0	1.63184	11.1467	11.1432	10.4181	9.60005	11.3598	9.73404	12.9268	12.4284	11.8841	11.4749	12.7967	11.6819	10.9263	11.0785	11.4284	10.5277	10.7882	10.2379	11.4154	11.1086	11.1049	11.4384	11.6298	11.7165
F1SL22	VWF	F1SL22_PIG	von Willebrand factor	4.55801e-07	1e-05	1.23769	19.5997	18.9744	18.7017	19.1089	18.7349	18.4778	19.5306	21.123	20.4217	20.0523	20.5956	19.3002	19.3088	19.094	18.5943	18.924	19.204	18.6835	18.9863	19.5846	19.5618	19.7941	19.872	19.3452
P79335	SERPINE1	PAI1_PIG	Plasminogen activator inhibitor 1	3.80794e-07	1e-05	4.40996	9.36285	12.6122	12.451	11.3525	12.1795	12.1874	16.3302	15.9962	17.1157	15.3376	17.0555	14.7699	11.0802	16.3619	12.5494	17.1126	12.6113	11.9103	14.2975	16.1539	13.5816	16.0712	16.29	15.0725
F1S7Z7	ANGPTL3	F1S7Z7_PIG	Fibrinogen C-terminal domain-containing protein	5.83527e-07	2e-05	-0.988289	15.5469	15.1901	14.6012	15.5173	14.7621	15.1827	14.4132	14.5401	14.1775	13.0631	14.3453	14.3313	14.9409	14.9847	15.3193	15.2002	15.1681	15.4198	14.6098	14.837	14.6521	14.83	14.6862	15.2094
E0A8P1	IGFBP1	E0A8P1_PIG	Insulin-like growth factor-binding protein 1	8.72465e-07	2e-05	2.93857	12.342	13.8054	11.1269	12.3395	11.6742	14.4462	13.5293	17.4535	14.6822	15.4926	16.2656	15.9424	15.0788	14.1206	15.1849	13.3527	15.8827	14.7181	13.7752	15.6263	14.4246	15.4427	14.4114	14.8322
K7GP14;P31936	IBSP	K7GP14_PIG;SIAL_PIG	Bone sialoprotein 2	7.19601e-07	2e-05	1.7011	14.1994	13.8989	13.5664	13.9574	13.3385	13.4115	15.0621	15.8574	16.248	14.7197	16.4897	14.2016	13.7778	13.9859	12.9055	12.3871	12.8464	13.8453	13.6178	13.8677	14.5366	13.5648	14.1554	13.667
A0A286ZVG0;A0A287A0D2	PSAP	A0A286ZVG0_PIG;A0A287A0D2_PIG	Saposin-B-Val;Prosaposin	1.19104e-06	3e-05	0.52652	15.4425	14.774	14.779	14.3882	14.5216	14.6863	15.1956	15.4388	15.1864	15.0238	15.6154	15.2908	14.8837	15.0351	14.6684	14.6842	15.0815	14.9474	14.7348	15.0024	15.2634	14.9499	15.0457	15.0473
F1RQW7	C2	F1RQW7_PIG	Uncharacterized protein	1.87479e-06	4e-05	0.528372	14.3655	14.1522	13.8078	14.4409	13.7887	14.9901	14.715	14.6105	15.1783	14.4259	15.1223	14.6633	13.846	14.0345	13.3223	13.7538	13.9403	13.4992	14.2288	14.8979	15.6178	14.912	14.8945	14.7473
A0A287AXI8	FSTL3	A0A287AXI8_PIG	Follistatin like 3	1.83071e-06	4e-05	1.00477	14.5742	13.647	12.8658	12.4006	13.0502	13.477	14.5544	14.0884	14.7718	13.8149	14.544	14.27	13.0875	13.6835	13.0872	12.7921	12.9735	13.6607	13.8517	13.8695	14.1941	14.0264	13.2905	13.9357
A0A287BPE2	CSF1	A0A287BPE2_PIG	Colony stimulating factor 1	3.58455e-06	8e-05	1.38237	12.704	13.1723	12.7187	12.913	13.08	13.4117	14.459	14.2311	14.944	14.2284	14.9396	13.4918	12.7623	13.2791	12.9639	12.4763	13.3852	14.9345	13.4314	13.609	13.5063	13.4796	13.6683	13.2554
A0A287ALH4;A0A287AQG0;A0A287B901;A0A2C9F3C8;K7GNA9;K7GPI3;K7GS31;Q95242	PECAM1	A0A287ALH4_PIG;A0A287AQG0_PIG;A0A287B901_PIG;A0A2C9F3C8_PIG;K7GNA9_PIG;K7GPI3_PIG;K7GS31_PIG;PECA1_PIG	Platelet endothelial cell adhesion molecule	4.00568e-06	9e-05	0.450893	17.3135	16.965	16.7755	17.0342	16.6783	16.9242	17.5074	17.2462	17.6717	17.1007	17.3621	17.5079	17.0598	17.0198	17.0113	16.8006	17.1313	17.0638	16.8549	16.7526	16.9021	17.2162	17.2065	16.8304
A0A287AU22;A0A287B8K4	PLVAP	A0A287AU22_PIG;A0A287B8K4_PIG	Plasmalemma vesicle associated protein	5.40503e-06	0.00012	0.864108	13.9704	13.6862	13.9741	14.2	13.706	13.227	14.5477	14.7781	14.9189	14.3345	15.0729	14.2962	14.2048	13.9379	14.4471	14.0131	14.1432	14.4451	13.6527	13.2119	13.6104	14.4993	13.634	13.4041
A0A286ZR66;A0A286ZVK1	F11	A0A286ZR66_PIG;A0A286ZVK1_PIG	Coagulation factor XI	6.98176e-06	0.00015	2.13778	16.6688	14.0283	15.3748	15.4234	14.4679	17.2236	16.8877	18.6962	17.9829	18.6476	16.0203	17.7788	17.1358	16.2395	16.1421	17.3403	17.1082	16.1029	18.3729	18.4175	19.0659	18.9811	18.7225	18.6157
A0A287BKG2;F1S7U3	CHI3L1	A0A287BKG2_PIG;F1S7U3_PIG	Chitinase-3-like protein 1	9.66584e-06	0.0002	1.99864	12.4487	13.4807	11.6882	13.2101	12.8929	13.599	15.1261	14.7658	15.4896	14.1138	15.6765	14.1395	11.3446	14.0874	13.4381	12.8745	12.7286	13.3515	13.0852	15.3723	14.9579	14.4755	13.7919	14.3735
A0A287BEU8;A0A5K1UL09;K7GPV8;Q9GKE2	CXCL16	A0A287BEU8_PIG;A0A5K1UL09_PIG;K7GPV8_PIG;CXL16_PIG	C-X-C motif chemokine 16	1.58261e-05	0.00032	1.43999	12.2716	11.1512	10.6876	12.1131	10.9171	11.4384	13.0313	13.026	12.1621	12.7214	13.1721	13.106	10.9867	11.8509	12.5694	12.423	11.3479	12.2735	12.2641	11.8411	13.7705	12.7817	12.9864	12.3671
F1SS26	THBS1	F1SS26_PIG	Uncharacterized protein	1.88563e-05	0.00036	1.1241	15.6375	16.071	16.6652	15.6678	16.2343	16.1375	16.9505	17.23	17.756	17.0094	17.6766	16.5352	16.0968	15.4114	15.9807	17.5988	15.7894	16.1953	16.3658	16.8041	16.9713	16.8302	16.2382	16.3722
A0A287BKI9	B3GNT7	A0A287BKI9_PIG	Hexosyltransferase	1.83981e-05	0.00036	0.382389	15.2995	14.7748	15.0621	15.0613	14.6308	15.1003	15.5013	15.1089	15.3876	15.4786	15.3319	15.4149	14.6916	15.1322	14.97	14.6116	14.6312	15.0286	14.6529	14.8227	15.3321	15.0557	14.9733	14.6891
A0A287B7B9;A0A287BEM9;A0A5G2QVI0;A0A5S6FYV9;A0A5S6I1G3;Q07717	B2M	A0A287B7B9_PIG;A0A287BEM9_PIG;A0A5G2QVI0_PIG;A0A5S6FYV9_PIG;A0A5S6I1G3_PIG;B2MG_PIG	Beta-2-microglobulin	2.17067e-05	0.0004	0.782794	15.9496	15.4185	15.3603	15.5253	14.9845	16.3965	16.3673	16.3824	16.5217	16.3312	16.7837	15.9452	15.4986	15.1118	15.6082	14.8885	15.5975	14.6435	15.8707	16.6535	16.1115	16.5098	16.2928	16.6288
B9UJD6	C1QTNF3	B9UJD6_PIG	C1q and tumor necrosis factor related protein 3 isoform b	2.39141e-05	0.00044	-0.6431	16.9647	16.9318	16.8402	17.0236	16.7284	16.5646	16.4999	15.9836	16.3416	16.2311	16.291	15.8476	16.9104	16.7243	16.6491	16.7014	17.0601	17.0318	16.854	16.735	15.7465	16.5437	16.4538	16.3273
A0A287A016;A0A287BE48	PLXDC2	A0A287A016_PIG;A0A287BE48_PIG	Plexin domain containing 2	3.139e-05	0.00055	0.304159	17.7787	17.3746	17.331	17.5928	17.1874	17.3872	17.6579	17.6318	17.9799	17.5127	17.8135	17.8808	17.601	17.5388	17.3323	17.1668	17.7241	17.2759	17.1548	17.4256	17.482	17.4718	17.7014	17.4181
A0A286ZVG3;Q95274	LOC110257905;TMSB4	A0A286ZVG3_PIG;TYB4_PIG	Thymosin beta;Thymosin beta-4	3.22714e-05	0.00055	1.05269	15.8914	15.1287	14.7286	15.372	15.306	15.2186	15.9702	17.1416	16.4402	16.0267	16.6856	15.697	15.9473	15.1566	15.2795	16.7358	15.449	15.5519	15.4398	15.7779	15.8895	15.8934	15.8789	15.6098
A0A5G2QM06	FBN2	A0A5G2QM06_PIG	Fibrillin 2	3.05054e-05	0.00055	-0.324987	15.112	14.9429	15.165	15.3886	14.951	15.0642	14.9512	14.6864	14.7855	14.8241	14.6794	14.7471	14.7732	14.8588	14.7183	14.752	15.1313	14.7884	14.6188	14.8839	14.4852	14.7599	14.6567	14.6292
A0A286ZUJ1;A0A480QHS7	CORO1A	A0A286ZUJ1_PIG;A0A480QHS7_PIG	Coronin	3.36053e-05	0.00055	1.31399	12.7457	13.1919	13.7278	13.9359	13.2	13.9275	14.3094	16.2183	14.8011	14.144	15.4303	13.7098	13.2168	12.7192	13.4123	14.2009	13.2629	13.6222	13.6377	14.2081	14.0895	14.252	14.4183	13.8176
F1S6S9	PRTN3	F1S6S9_PIG	Proteinase 3	3.31099e-05	0.00055	2.70851	10.6882	12.7581	13.1358	14.2306	13.075	13.6827	15.5895	15.2019	16.4163	15.4977	15.9883	15.1278	10.7334	12.115	13.5187	12.464	12.0895	15.7004	14.6514	15.5237	15.0485	16.0611	15.2296	14.8893
B8YGC1	REG3G	B8YGC1_PIG	Regenerating islet-derived family member 3 isoform 2	3.52066e-05	0.00057	3.07773	13.5585	10.4775	11.1069	9.56929	12.7237	13.6866	13.0314	15.1157	15.3461	15.3915	15.7839	14.9202	11.5371	12.2956	12.3106	12.3303	12.8159	12.5558	11.803	14.7935	12.3948	14.5417	14.3855	10.7887
P04366	AMBP	AMBP_PIG	Protein AMBP (Fragment)	3.96979e-05	0.00063	-0.509906	23.1483	22.7668	23.2625	22.9996	23.1227	23.0055	22.5002	22.7382	22.2106	22.7933	22.2641	22.7396	22.9673	23.4309	23.4603	22.9388	23.3876	23.214	23.1973	22.8967	23.0255	22.8076	23.1361	22.4924
F1REZ2;I3LFP3;K7GLS1	VCAN	F1REZ2_PIG;I3LFP3_PIG;K7GLS1_PIG	Versican	8.66807e-05	0.00135	1.43003	12.5307	12.8734	12.997	12.7267	12.9485	13.165	13.5985	14.0655	15.4779	13.45	16.0244	13.2053	13.2425	13.628	12.721	12.6978	13.021	13.4329	12.7243	13.3828	13.4361	12.5963	13.1975	12.7798
A0A287AE47;A0A287B310	STOM	A0A287AE47_PIG;A0A287B310_PIG	Stomatin	9.21553e-05	0.00141	1.17279	13.0437	13.9711	13.5274	13.528	13.0656	13.9039	13.8637	14.7889	15.4496	14.5084	15.1688	14.2971	15.633	12.9391	13.5524	16.0419	14.5687	13.5702	14.143	14.2635	12.6334	14.4552	14.1356	14.3108
A0A287A0A9;F1S3P6;O19113	CCN2	A0A287A0A9_PIG;F1S3P6_PIG;CCN2_PIG	CCN family member 2	0.000100803	0.00152	1.03846	13.8492	13.8452	13.0058	13.4102	12.4936	13.9845	14.391	14.7033	14.2497	14.1516	15.048	14.2756	13.8985	13.9297	14.2434	15.125	13.9761	13.5378	14.2568	14.4264	15.1872	14.2577	14.212	14.1268
Q69DK8	NA	C1S_PIG	Complement C1s subcomponent	0.000106617	0.00158	0.549617	17.5771	17.8879	17.285	17.8811	17.6187	17.7575	18.388	17.765	18.3332	18.1184	18.5595	18.1409	17.5031	17.4806	17.4704	17.5467	17.6097	18.0815	18.1462	18.4151	18.6731	18.479	17.9866	18.3127
A0A5G2QHN7;A0A5G2RDZ7;A0A5G2REB0;A0A5K1UD05;A0A5S8KXS2;Q29221	CAPZA2;CAPZA2;CAPZA2;CAPZA1;CAPZA2;CAPZA2	A0A5G2QHN7_PIG;A0A5G2RDZ7_PIG;A0A5G2REB0_PIG;A0A5K1UD05_PIG;A0A5S8KXS2_PIG;CAZA2_PIG	F-actin-capping protein subunit alpha;F-actin-capping protein subunit alpha;F-actin-capping protein subunit alpha;F-actin-capping protein subunit alpha;F-actin-capping protein subunit alpha;F-actin-capping protein subunit alpha-2	0.000112241	0.00161	2.8785	11.6156	10.6433	15.7027	12.1892	12.0461	12.4164	15.935	15.996	15.1253	13.2164	15.4086	16.203	14.7802	12.2212	11.6091	14.2759	16.0013	13.2231	11.9717	12.2447	12.6263	12.9143	12.3182	12.3926
A2TLM1;F1STC1	RPIA	RPIA_PIG;F1STC1_PIG	Ribose-5-phosphate isomerase	0.000111296	0.00161	1.10521	12.0316	12.4263	11.3115	11.9925	11.8556	12.3053	12.5487	14.2021	13.2913	12.7098	13.1445	12.6576	13.3452	12.6249	12.3074	13.8928	12.7463	12.5902	12.6566	12.6879	12.349	12.5384	11.7232	12.1918
F1SLL1;K7GRW1	IL6ST	F1SLL1_PIG;K7GRW1_PIG	Interleukin 6 signal transducer	0.000120234	0.00169	0.405811	14.9034	14.8346	14.8291	14.8695	14.9121	14.8119	15.2122	15.1075	15.2879	15.3592	15.2199	15.4086	14.4833	15.0616	14.7512	15.1728	14.975	15.3568	14.9356	15.1182	15.2071	15.3409	15.2048	14.9697
A0A286ZJ21;A0A287ADL0;I3LEW0	COLEC11	A0A286ZJ21_PIG;A0A287ADL0_PIG;I3LEW0_PIG	Collectin subfamily member 11	0.000150469	0.00208	-0.347601	17.2025	16.9531	16.9932	16.8296	16.9196	17.1232	16.7237	16.7212	16.6636	16.632	16.425	16.7702	16.8247	17.1647	16.6652	16.5948	16.9055	16.5136	16.3926	16.5339	16.605	16.4567	16.5268	16.2827
A0A287BLX2;A0A5G2RMJ1;I3LDJ1	FOLR1	A0A287BLX2_PIG;A0A5G2RMJ1_PIG;I3LDJ1_PIG	Folate receptor alpha	0.000158474	0.00216	0.661064	16.3489	16.7599	15.8458	16.4553	15.9467	16.2546	16.7644	16.9905	16.5798	16.522	17.1391	17.5818	16.9806	16.3496	16.3731	16.2786	16.5533	16.5927	16.5938	16.8226	17.2294	16.7513	16.8522	16.5416
A0A286ZI97	PGLYRP1	A0A286ZI97_PIG	Peptidoglycan-recognition protein	0.000172749	0.00232	1.77763	12.9223	12.2211	11.506	10.9336	12.0757	11.8641	13.725	13.2032	14.2593	13.1991	13.9343	13.8675	8.9678	13.323	11.7166	11.6339	12.0917	10.7305	13.111	13.4237	13.2498	13.4672	12.9188	12.6699
A0A286ZIL9;A0A5G2R4W0	COL18A1	A0A286ZIL9_PIG;A0A5G2R4W0_PIG	Collagen type XVIII alpha 1 chain	0.000187366	0.00247	0.320907	16.4089	15.9441	15.8731	16.0673	15.7437	15.9511	16.2287	16.0726	16.2668	16.3839	16.5272	16.4342	15.7783	16.2794	16.0917	15.5337	15.9873	16.013	15.9388	16.0574	16.659	16.3865	16.0466	15.9227
A0A287ALA0	BASP1	A0A287ALA0_PIG	Uncharacterized protein	0.00020057	0.00261	0.862444	12.4762	12.4484	11.3258	11.8788	11.902	12.1294	12.6813	13.1823	13.1435	12.5108	13.3825	12.4348	12.032	12.1452	11.4903	12.7431	12.1772	11.8943	12.7701	11.9319	12.6317	12.0733	12.1016	12.7187
A0A5G2QF97;A0A5G2QVW3;A0A5S6GJ84;O02837	CSF3	A0A5G2QF97_PIG;A0A5G2QVW3_PIG;A0A5S6GJ84_PIG;CSF3_PIG	Granulocyte colony-stimulating factor	0.000240816	0.00308	2.16397	11.0529	11.6161	12.8019	9.94959	10.3941	11.3897	12.9137	12.7478	15.7593	12.4271	14.6318	11.7082	13.1472	11.5683	10.5777	11.6134	12.2121	10.8691	10.5491	13.0161	11.4441	13.3813	12.0153	11.7106
F1RF79;P24259	NPPB;NPPA	F1RF79_PIG;ANF_PIG	Natriuretic peptides B;Natriuretic peptides A	0.000270188	0.00341	1.15847	14.0261	14.457	13.2878	14.1049	14.0299	14.5252	15.6527	14.4427	15.6815	14.9912	15.2707	15.3427	14.1453	13.3946	13.9766	14.1161	15.2339	14.596	15.0041	15.1455	15.3528	15.9644	14.7292	14.1646
A0A5G2QJT3;F1RHA9	LECT2	A0A5G2QJT3_PIG;F1RHA9_PIG	Leukocyte cell-derived chemotaxin-2;Leukocyte cell derived chemotaxin 2	0.000288866	0.00359	-1.0671	12.2563	10.3146	10.9596	11.3869	10.9525	11.4562	10.5743	10.6745	9.75638	9.84768	8.9929	11.0779	11.7101	12.4126	11.7594	11.7012	12.3475	11.6239	11.9882	11.5141	11.8336	11.4578	11.5063	11.6732
F1SJZ1	STC2	F1SJZ1_PIG	Stanniocalcin-2	0.00029752	0.00365	0.442103	14.9424	14.6326	14.4917	14.356	14.2612	14.781	14.8279	14.8672	15.1554	15.2899	14.9203	15.0569	13.785	14.2156	14.0469	13.9392	14.0068	14.2454	14.0098	13.9119	14.3311	14.4529	14.0256	14.2275
A0A287BRL8	MARCKS	A0A287BRL8_PIG	Myristoylated alanine rich protein kinase C substrate	0.000305405	0.00369	0.774398	13.4184	13.4929	12.9786	13.3685	13.1542	13.6471	13.9659	14.5503	14.3225	13.5765	14.6433	13.6474	12.9769	12.9169	13.1889	13.2146	13.1894	13.6255	13.358	14.0275	13.5984	13.2624	12.6581	13.4456
P49930	PMAP23	PMP23_PIG	Antibacterial peptide PMAP-23	0.000371059	0.00442	2.77758	11.9628	10.8529	9.05339	8.1207	8.13444	9.28377	12.1169	12.4196	13.4975	10.182	13.5329	12.3248	8.93355	8.73251	7.74512	9.35034	7.73419	9.95281	12.3402	12.3167	13.511	13.1043	11.4988	8.72439
A0A286ZNV0;I3LUD1	SOD3	A0A286ZNV0_PIG;I3LUD1_PIG	Superoxide dismutase [Cu-Zn]	0.000423495	0.00498	0.691024	15.3221	15.4053	14.8665	15.1274	14.9373	15.3422	16.3324	15.9144	15.5312	15.6956	15.9098	15.7636	14.8577	15.0953	15.5061	14.8733	14.4566	15.5365	15.3474	15.373	15.794	15.7996	14.6524	15.3304
A0A287BLU7;A0A288CG53;A0A5G2QWH2;A0A5G2QYA4;A0A5G2R8N1	SELL	A0A287BLU7_PIG;A0A288CG53_PIG;A0A5G2QWH2_PIG;A0A5G2QYA4_PIG;A0A5G2R8N1_PIG	L-selectin;Selectin L;Selectin L;L-selectin;L-selectin	0.00048975	0.00568	0.387943	15.8185	16.2401	15.571	15.7221	15.3027	15.6193	16.2116	15.6436	16.4156	15.7391	16.0151	16.5764	16.0996	15.795	15.4203	15.3962	15.8126	15.364	15.6315	15.8224	16.2722	16.0948	16.1931	15.9527
A0A5G2R9A9	PFN1	A0A5G2R9A9_PIG	Profilin	0.000606151	0.00693	1.22903	14.9879	14.6302	14.1298	14.7875	14.6395	14.7818	15.4641	16.6767	16.0974	15.5064	16.5779	15.0084	15.1	14.4985	14.6004	16.9734	14.5135	15.2599	14.9014	15.4649	15.2812	15.2589	14.9652	14.7762
A0A287AKU7;A0A287AVF2;A0A287BQB6;F1SMI5;I3LDR6;I3LUI4	TNC	A0A287AKU7_PIG;A0A287AVF2_PIG;A0A287BQB6_PIG;F1SMI5_PIG;I3LDR6_PIG;I3LUI4_PIG	Tenascin	0.000701936	0.00783	0.883845	16.6291	16.0829	15.5147	15.8268	15.1077	15.9409	16.3666	16.43	16.7336	16.7292	17.8408	16.3052	15.6465	15.6766	15.5049	15.3605	15.8621	16.0559	15.7485	16.1351	15.5935	16.4735	15.5185	15.9216
P42831	CCL2	CCL2_PIG	C-C motif chemokine 2	0.00070304	0.00783	1.9004	9.86987	10.4429	11.5222	12.1183	11.7122	10.9656	13.9858	12.6144	14.2819	11.7104	14.2192	11.2217	10.0422	11.3599	11.7892	10.9882	11.489	11.2387	12.7265	14.1001	11.8511	14.6071	13.3453	13.5052
F1SFI5	HRG	F1SFI5_PIG	Uncharacterized protein	0.000834265	0.00912	-0.438461	25.1235	24.9107	25.2597	25.0348	25.2665	25.1884	24.7655	24.545	24.501	24.8245	24.4661	25.0507	24.8633	25.0268	25.1948	24.3627	25.1829	25.1061	25.0127	25.1118	24.7128	24.9695	24.9485	24.6182
F1RVL7	TREML1	F1RVL7_PIG	Triggering receptor expressed on myeloid cells like 1	0.000839308	0.00912	1.05184	13.4438	12.6564	13.7516	13.3641	12.7743	12.7082	13.9049	14.4712	14.5003	14.08	14.6015	13.4516	13.4805	12.7345	13.6525	15.0312	12.5942	12.5655	13.2485	13.8269	14.2185	14.2647	13.6894	13.5447
A0A287BIL8	HSPA5	A0A287BIL8_PIG	Endoplasmic reticulum chaperone BiP	0.000855212	0.00917	0.509981	15.6184	15.4752	15.3285	15.6235	15.2596	15.7556	15.9307	16.3287	16.2301	15.515	16.2438	15.8722	15.0168	15.3175	15.0253	15.1575	15.1413	15.3596	15.1945	15.4858	15.8968	15.9814	15.9467	15.9759
Q9GLP1	F5	FA5_PIG	Coagulation factor V	0.000937883	0.00993	-0.480204	17.668	17.8084	17.9916	17.5296	17.6478	17.4644	17.5125	17.1319	16.673	17.3671	16.9584	17.5856	17.8665	18.0577	18.234	18.3566	17.9158	17.7649	17.9874	17.9245	17.6181	17.493	17.7503	17.7164
F1RM45	APOE	F1RM45_PIG	Apolipoprotein E	0.000962316	0.01007	-0.654333	18.4324	18.0177	17.7913	18.0182	17.8278	18.5979	17.391	17.7685	17.3098	17.3499	16.6934	18.2467	18.8975	19.3105	18.9152	19.0256	19.0653	19.0722	18.5006	18.3846	18.8456	18.6561	18.6623	18.8232
A0A286ZXX3;F6QA36	ACTR2	A0A286ZXX3_PIG;F6QA36_PIG	Actin-related protein 2	0.00104961	0.01085	1.08765	14.6173	14.0958	14.3071	13.5096	14.3162	14.5912	14.7913	16.4272	15.7748	14.842	15.8832	14.2447	14.7941	14.0489	14.7	15.0821	13.9216	14.6268	14.9664	14.756	14.9217	13.9718	14.1926	14.2316
A2SW51	CD14	A2SW51_PIG	Monocyte differentiation antigen CD14	0.00109456	0.01118	0.272085	17.0883	17.1894	17.347	17.2313	17.1606	17.1976	17.1586	17.2786	17.4857	17.7357	17.72	17.4679	17.0754	17.3332	17.0789	17.4073	17.3244	17.0092	17.391	17.7243	17.8228	17.6536	17.8899	17.6563
F1SNF3	PODXL	F1SNF3_PIG	Podocalyxin	0.00119866	0.0121	0.445649	15.6243	15.9461	15.7592	15.8647	15.6053	15.9508	15.8475	16.0269	16.8016	16.1641	15.886	16.6982	15.8462	15.9767	15.6442	15.7494	16.7199	15.1641	16.2099	16.2015	15.5963	15.5917	16.2369	16.2344
F1RS37	POSTN	F1RS37_PIG	Periostin	0.00128437	0.01281	-1.07326	21.4438	21.3743	19.4928	20.7693	20.0729	20.4918	19.4708	19.0392	19.1078	19.5459	20.5875	19.4539	19.7032	20.644	19.7008	19.6849	20.382	21.1056	19.6823	19.0358	18.801	18.6959	18.2673	19.1288
A0A480K168;F8S329	NA	A0A480K168_PIG;F8S329_PIG	Endogenous retrovirus group S71 member 1 Env polyprotein-like;Env protein	0.00143057	0.01411	0.604786	14.6386	14.6611	14.172	14.8134	14.5564	14.6002	14.7179	15.2309	15.4756	15.3037	15.3105	15.0319	13.4297	13.8877	14.0684	13.711	12.9846	13.9507	13.8216	14.1064	14.521	14.7596	14.0903	14.0925
A0A287AC25;A0A2C9F362;A0A2C9F3F9;A0A5G2QR94;F1SRJ7;I3LBI3;K7GM05;K7GR74;P16545	IGF1	A0A287AC25_PIG;A0A2C9F362_PIG;A0A2C9F3F9_PIG;A0A5G2QR94_PIG;F1SRJ7_PIG;I3LBI3_PIG;K7GM05_PIG;K7GR74_PIG;IGF1_PIG	Insulin-like growth factor I;Insulin-like growth factor I;Insulin-like growth factor I;Insulin-like growth factor I;Insulin-like growth factor 1 transcript variant 6;Insulin-like growth factor I;Insulin-like growth factor I;Insulin-like growth factor I;Insulin-like growth factor I	0.00147168	0.01419	-0.659159	14.7104	14.5432	14.906	14.7802	15.1318	14.9083	14.9378	14.2041	14.0721	14.4249	14.4828	12.9033	13.232	13.9527	14.2356	14.1969	14.0701	14.4089	14.0331	14.208	12.992	14.1128	14.1585	14.2052
A0A287AEY7;A0A287BHG5;A0A5G2QIS5;A0A5G2QTD7;A0A5G2QV88	VSIG4	A0A287AEY7_PIG;A0A287BHG5_PIG;A0A5G2QIS5_PIG;A0A5G2QTD7_PIG;A0A5G2QV88_PIG	V-set and immunoglobulin domain containing 4	0.00146707	0.01419	1.1481	10.5519	11.6163	11.5021	11.6598	11.7797	11.1685	12.726	13.2265	12.1444	12.6741	13.0257	11.37	11.1358	9.99451	11.6846	11.1769	11.7617	12.1388	11.6984	12.4698	11.8439	12.3757	11.6799	11.449
A0A287AL17;A0A287BJV9;F1S8X2;I3LPI4	CRTAC1	A0A287AL17_PIG;A0A287BJV9_PIG;F1S8X2_PIG;I3LPI4_PIG	Cartilage acidic protein 1	0.00169863	0.01616	-0.625677	15.6737	15.8411	15.8194	16.2537	15.9746	16.1682	15.3788	15.1025	15.1753	15.31	14.9388	16.0713	15.6117	15.8208	15.1554	14.8562	16.0066	15.5968	15.3814	15.5732	15.4726	15.6883	15.9247	15.4251
Q6R953	DEFB1	Q6R953_PIG	Beta-defensin 1	0.00171379	0.01616	1.04594	14.5929	14.7377	14.3195	14.6293	14.5969	14.3918	15.8215	14.9163	15.0345	16.535	15.4643	15.7721	14.5176	15.5574	14.2646	14.7406	14.0346	14.9294	15.2579	14.7682	14.7168	16.3646	14.024	15.302
A0A287B3S3	ITIH1	A0A287B3S3_PIG	Inter-alpha-trypsin inhibitor heavy chain H1	0.00207809	0.01918	-0.591517	21.3307	21.385	21.5173	21.8741	21.6398	20.8713	21.0055	21.0939	20.2369	20.9819	20.5549	21.196	21.2752	21.6744	21.8865	21.4432	21.7741	21.507	21.722	21.4407	21.5089	21.0024	21.6656	20.769
F1RW71	MMRN1	F1RW71_PIG	Multimerin 1	0.0020791	0.01918	0.678458	14.9279	15.1267	15.0282	14.2065	14.9965	14.4698	15.7046	15.1814	15.4166	15.4985	15.4853	15.54	14.4198	15.3058	15.1771	14.4648	13.6584	14.9009	14.6599	14.7129	15.2096	15.2681	14.6836	14.5457
F1RQ17	ADGRF5	F1RQ17_PIG	Adhesion G protein-coupled receptor F5	0.00248453	0.02268	0.413751	15.4373	15.4202	15.4954	15.668	15.2614	15.0806	15.8939	15.87	16.2312	15.7348	15.7853	15.3303	15.3195	15.4351	15.4472	15.2018	14.7794	15.1027	15.0869	15.3559	15.2257	15.0495	15.3232	15.0924
A0A287AS68;A0A5G2QR79;Q29042	FCN1	A0A287AS68_PIG;A0A5G2QR79_PIG;FCN1_PIG	Ficolin-1	0.00253257	0.02287	1.95394	13.9922	13.3268	14.8247	14.143	14.0597	14.1448	18.4202	14.6073	14.4819	16.8782	16.825	15.0022	13.1459	14.1489	13.2111	13.2262	16.291	12.8827	13.6343	14.2883	14.3266	14.6016	14.0492	13.3967
K7GPT9	CFB	K7GPT9_PIG	Complement factor B	0.00261864	0.0234	0.373024	21.4956	21.8899	22.0165	21.7075	21.8809	21.5833	22.3069	21.9145	21.9815	22.3792	22.1022	22.1274	21.6647	21.8425	21.745	22.1217	21.5825	22.0023	22.3561	22.2112	22.4542	22.3828	22.0993	21.85
A0A5G2QSF4;A0A5G2R164;A0A5G2RIA8;A0A5G2RJM5	PROC	A0A5G2QSF4_PIG;A0A5G2R164_PIG;A0A5G2RIA8_PIG;A0A5G2RJM5_PIG	Vitamin K-dependent protein C	0.00275748	0.02439	-0.574773	20.2226	19.5833	20.3833	19.7595	20.1139	20.3693	19.9008	19.4756	18.8237	20.0806	19.2925	19.41	19.9945	20.2081	20.3149	20.4689	20.3835	20.0366	19.7104	20.222	20.2665	19.73	20.39	19.5418
O18831	MSTN	GDF8_PIG	Growth/differentiation factor 8	0.0028568	0.02501	-0.484461	14.3646	14.73	14.6695	14.7337	15.326	13.5045	14.5487	14.1288	13.4983	14.409	14.1425	13.6942	13.7398	13.175	14.3793	14.1887	14.4671	15.2234	14.6478	14.6463	13.2119	14.2564	14.3298	13.3396
I3LCH7	GALNT5	I3LCH7_PIG	Polypeptide N-acetylgalactosaminyltransferase	0.00297915	0.02582	-0.494367	14.5304	14.0963	14.2026	14.6895	14.208	14.3624	13.8177	13.9115	14.0873	13.8113	13.884	13.611	13.3852	13.8969	14.2041	13.6733	14.1425	14.4771	13.8686	14.0842	13.3712	13.9849	13.866	13.7072
A0A287ATV4;A0A287B4G4;A0A5G2QQK3;A0A5G2R1K1;A0A5G2R6S0;I3LKU0	RAC3;RAC1;RAC1;RAC2;RAC2;RAC2	A0A287ATV4_PIG;A0A287B4G4_PIG;A0A5G2QQK3_PIG;A0A5G2R1K1_PIG;A0A5G2R6S0_PIG;I3LKU0_PIG	Rac family small GTPase 3;Rac family small GTPase 1;Rac family small GTPase 1;Rac family small GTPase 2;Rac family small GTPase 2;Rac family small GTPase 2	0.00349412	0.02998	1.08372	13.088	14.2948	13.5637	14.1027	13.645	14.3937	14.2002	15.6439	15.7625	15.096	15.4392	13.4485	14.3796	14.054	14.3993	16.1813	14.4457	14.6975	13.8356	14.496	13.8889	14.719	13.9427	14.4412
F1SFI4	KNG1	F1SFI4_PIG	Kininogen 1	0.00362538	0.0308	-0.346864	17.8497	17.5671	17.6925	17.48	17.6428	18.0378	17.2521	17.2743	16.9115	17.7373	17.3662	17.6473	17.526	17.5574	17.5249	17.6584	17.444	17.4955	17.4469	17.2455	17.5258	17.5658	17.4992	17.5276
A0A287AK21;A0A287BK36;F1RJ93	TAGLN2	A0A287AK21_PIG;A0A287BK36_PIG;F1RJ93_PIG	Transgelin	0.00371431	0.03124	1.13423	13.5391	13.1282	12.0027	13.1716	13.0441	13.1691	13.6272	15.0475	14.3894	13.7534	14.6497	13.393	13.7544	13.4187	13.1969	15.4553	13.3703	13.7959	12.8806	13.789	14.0103	14.0107	13.9688	13.0913
A0A5G2QC96	F13B	A0A5G2QC96_PIG	Coagulation factor XIII B chain	0.00376084	0.03133	-0.460619	19.1794	19.3561	18.6615	19.1353	18.937	19.0416	18.5189	18.77	18.9282	18.2435	18.3396	18.747	18.9655	19.5159	18.8446	18.8834	18.9869	18.5858	18.6416	18.6301	18.8425	18.8939	18.5993	19.0631
P48819	VTN	VTNC_PIG	Vitronectin	0.00380321	0.03138	-0.465296	22.0039	22.0113	22.3238	22.7308	22.4833	22.4462	21.797	22.1852	21.6768	22.3093	21.4834	21.7555	21.9898	22.3195	22.6574	22.3839	22.6206	22.6073	22.3137	22.3764	22.0917	22.5725	22.2388	22.1848
A0A5G2R8D7;K9IVR7	WDR1	A0A5G2R8D7_PIG;K9IVR7_PIG	WD repeat domain 1	0.00478852	0.03913	0.771509	14.6913	14.2633	14.6661	15.2249	15.0096	15.3158	15.0817	16.6599	15.7189	15.1354	15.7252	15.479	15.0473	14.6307	15.1341	15.8785	14.9616	15.2566	15.0837	15.4436	14.4275	14.8851	15.3657	14.9967
A0A286ZYP5;A0A287AAB2;A0A287AEH7;A0A287AFM5;A0A287AJS8;A0A287AQG3;A0A287B220;A0A287BBX0;F1S1N1;K7GLN3	SLA-2;SLA-11;SLA-2;SLA-2;SLA-2;SLA-2;SLA-2;SLA-2;SLA-2;	A0A286ZYP5_PIG;A0A287AAB2_PIG;A0A287AEH7_PIG;A0A287AFM5_PIG;A0A287AJS8_PIG;A0A287AQG3_PIG;A0A287B220_PIG;A0A287BBX0_PIG;F1S1N1_PIG;K7GLN3_PIG	Ig-like domain-containing protein;Histocompatibility antigen, class I;Ig-like domain-containing protein;Ig-like domain-containing protein;Ig-like domain-containing protein;Ig-like domain-containing protein;Ig-like domain-containing protein;Ig-like domain-containing protein;Ig-like domain-containing protein;Ig-like domain-containing protein	0.00559156	0.04526	1.02686	13.1092	12.9859	12.5457	11.4946	12.3138	12.4053	13.5546	14.1433	14.1792	13.2612	14.0261	11.8514	12.5397	12.2694	12.5576	12.1556	12.729	11.8148	12.4247	13.726	13.0469	13.7285	13.0517	13.5103
A0A287B1U6;A0A5G2QRA1;F1SGY4	NELL2	A0A287B1U6_PIG;A0A5G2QRA1_PIG;F1SGY4_PIG	Neural EGFL like 2	0.00587734	0.04713	-0.233984	17.7188	17.6468	17.6961	17.74	17.6175	17.8155	17.4682	17.3171	17.6939	17.5717	17.1649	17.6149	17.3932	17.6631	17.5871	17.427	17.6309	17.4134	17.3854	17.1279	17.3193	17.3981	17.2526	17.3837
A0A5G2Q956;O97763	NPC2	A0A5G2Q956_PIG;NPC2_PIG	NPC intracellular cholesterol transporter 2	0.00595496	0.04731	0.451018	16.6921	16.0443	16.0584	15.6797	15.9605	15.8397	16.5989	16.3592	16.1571	16.2512	16.9228	16.6916	16.0611	16.1956	16.0073	16.1635	16.1011	16.1151	15.8072	16.0356	16.2061	16.4223	15.6556	16.1721
A0A287AAH4;A0A5G2R543;B8XH67;F6PYE5	SLC9A3R1	A0A287AAH4_PIG;A0A5G2R543_PIG;B8XH67_PIG;F6PYE5_PIG	Na(+)/H(+) exchange regulatory cofactor NHE-RF	0.0065424	0.0515	1.87974	14.5228	11.3679	11.1064	10.7048	11.1958	12.7584	14.5985	14.361	13.1318	13.2503	14.0148	13.5783	10.614	11.0909	11.7856	13.7324	11.1289	11.2312	11.5132	12.6859	14.4939	13.8382	12.9955	12.335
A0A287AU27	DSPP	A0A287AU27_PIG	Uncharacterized protein	0.00677002	0.05281	0.797534	14.2976	13.9507	14.1794	14.3058	14.3846	14.8922	14.6984	15.2828	15.6067	14.3386	16.0726	14.7965	14.4877	13.7851	14.0133	13.0762	14.6287	14.0375	14.0373	13.9201	13.2808	13.9352	14.1037	14.2501
A0A287A4X6;A0A5G2QL34;A0A5G2QTJ9;I3LU56	ICOSLG	A0A287A4X6_PIG;A0A5G2QL34_PIG;A0A5G2QTJ9_PIG;I3LU56_PIG	Ig-like domain-containing protein	0.00692974	0.05357	0.350997	17.2812	17.2619	17.048	17.0798	16.9618	17.0213	17.4914	17.4278	17.2914	17.4866	17.5139	17.549	16.5029	16.9978	17.3081	16.5819	16.9836	17.3565	16.8238	16.9158	17.1184	17.2245	16.892	16.9167
K7GN89	IL18BP	K7GN89_PIG	Interleukin 18 binding protein	0.00735404	0.05634	5.87736	12.2634	12.3905	0	12.5142	10.4353	13.0754	16.0405	15.675	16.1751	16.2651	16.9281	14.8593	6.88809	13.3419	12.1486	0	11.665	11.0718	14.4016	15.6361	15.1145	15.4554	15.33	14.382
A0A5G2R9F7	FKBP1A	A0A5G2R9F7_PIG	Uncharacterized protein	0.00763199	0.05795	0.906935	15.2324	15.8921	14.9748	15.0361	14.8259	15.262	15.8363	16.7878	16.0953	16.109	16.5737	15.2628	16.1132	15.6471	15.0738	17.3354	15.4647	15.7685	15.0631	15.3508	15.709	15.7351	14.831	15.095
A0A286ZYQ3	FGL1	A0A286ZYQ3_PIG	Fibrinogen like 1	0.00792053	0.05961	0.522538	16.4769	16.2101	16.4894	16.2321	16.1745	16.7354	16.7413	17.8061	16.7071	16.8516	16.9028	16.4446	17.0589	16.2417	16.4445	16.8712	16.6664	16.5636	17.3343	17.299	17.6355	17.5326	16.9998	17.3149
O02668	ITIH2	ITIH2_PIG	Inter-alpha-trypsin inhibitor heavy chain H2	0.00816063	0.06089	-0.551991	22.1589	22.0368	22.3426	22.1533	22.1669	21.4062	21.6419	21.9565	20.9733	21.5748	20.9218	21.8845	21.9255	22.3725	22.64	21.9362	22.4648	22.0353	22.2527	22.2391	22.1309	21.7325	22.4026	21.5681
A0A5G2QTR9	YWHAB	A0A5G2QTR9_PIG	Tyrosine 3-monooxygenase/tryptophan 5-monooxygenase activation protein beta	0.0086265	0.06381	0.838619	15.5783	15.5611	14.2197	14.842	14.8814	14.9978	15.1914	17.099	15.7807	15.2861	16.5771	15.1779	15.2184	15.1494	15.1092	15.8263	15.5593	15.474	15.3277	15.5552	15.4626	15.0412	15.0634	15.2454
P18650	APOE	APOE_PIG	Apolipoprotein E	0.0087618	0.06425	-0.440584	22.0825	21.9966	21.7747	21.8904	21.7308	22.4575	21.6694	21.997	21.3529	21.6052	20.8291	21.8351	22.6456	23.1451	22.8979	23.1874	23.2556	23.1135	22.7856	22.4231	22.4865	22.8382	22.5788	22.4347
A0A287A5G1;A0A287AA77;A0A287AAR4;A0A5G2QZX1;I3LVD5;Q6QAQ1	ACTG1;ACTG1;ACTB;ACTG1;ACTG1;ACTB	A0A287A5G1_PIG;A0A287AA77_PIG;A0A287AAR4_PIG;A0A5G2QZX1_PIG;I3LVD5_PIG;ACTB_PIG	Actin gamma 1;Actin gamma 1;Actin, cytoplasmic 1;Actin gamma 1;Actin gamma 1;Actin, cytoplasmic 1	0.00912917	0.06638	1.05992	17.5088	17.4052	16.5181	16.9871	17.104	17.2257	17.4835	18.9685	18.6461	17.6322	19.254	17.124	17.3802	16.7557	17.3183	19.0386	16.8231	18.0464	17.2446	17.4592	17.5544	17.6096	17.3417	17.2337
F1RU34	CST6	F1RU34_PIG	Cystatin E/M	0.00932539	0.06724	0.42103	16.9997	15.8137	16.455	15.7632	15.9925	16.0452	16.7254	16.7367	16.1198	16.7275	16.624	16.6621	15.7697	16.3329	16.0159	15.7996	16.1157	16.0959	15.6572	15.3373	16.3463	16.3332	15.8754	15.8562
A0A5G2QGA4	CRP	A0A5G2QGA4_PIG	C-reactive protein	0.0100849	0.07151	1.04713	16.0089	15.9187	17.4004	16.6615	16.1493	16.7073	17.6445	17.6402	16.4271	18.8602	17.0056	17.5513	15.5525	16.1612	16.8622	16.5341	14.9496	15.6017	16.8846	17.2209	17.545	16.8603	16.5409	16.9429
A0A5G2QR34;F1RIF8	PGD	A0A5G2QR34_PIG;F1RIF8_PIG	6-phosphogluconate dehydrogenase, decarboxylating;6-phosphogluconate dehydrogenase, decarboxylating	0.0100547	0.07151	0.786111	14.8562	14.79	14.4926	14.4472	14.1631	14.7537	14.8771	16.495	15.6572	15.2387	15.8142	14.1372	14.6706	13.9031	14.6665	15.2864	14.404	14.8112	14.5833	14.812	14.477	14.7453	14.4992	14.5215
A0A286ZWK2;F1S9Q1;F1S9Q3	HSPA8	A0A286ZWK2_PIG;F1S9Q1_PIG;F1S9Q3_PIG	Uncharacterized protein	0.0104678	0.07362	1.06365	14.8617	15.1624	14.4888	14.6333	14.9753	15.2216	15.1798	17.5078	16.4096	15.284	16.6406	14.7032	15.7911	15.3261	15.5399	17.0287	15.2108	15.9624	15.1044	15.0686	15.246	15.4533	15.0461	14.8905
A0A287AD21;A0A5G2QGH3;A0A5G2QJK4;P61958	SUMO3;SUMO2;SUMO2;SUMO2	A0A287AD21_PIG;A0A5G2QGH3_PIG;A0A5G2QJK4_PIG;SUMO2_PIG	Small ubiquitin-related modifier;Small ubiquitin-related modifier 2;Small ubiquitin-related modifier;Small ubiquitin-related modifier 2	0.0107352	0.07488	1.14236	12.6961	12.0971	11.0992	12.2649	10.9005	12.3384	12.2009	14.5186	13.2245	12.7637	13.7139	11.8287	12.5692	12.2402	12.6195	14.0223	12.9812	12.9713	11.3931	12.0862	12.4596	12.6666	12.4218	11.906
F6Q469	SERPINA3-2	F6Q469_PIG	SERPIN domain-containing protein	0.0111959	0.07564	-0.51996	21.1765	22.1676	21.6847	22.6551	21.577	22.0315	21.7466	21.0938	21.4115	21.0806	20.9786	21.8617	22.0499	21.6389	21.2317	21.9219	21.9993	21.4622	21.918	22.4813	21.0042	22.3414	22.4094	22.1414
A0A286ZS39;A0A286ZW89;A0A287AN50;A0A287B6G6;A0A287BRA3;I3LGD9	AGRN	A0A286ZS39_PIG;A0A286ZW89_PIG;A0A287AN50_PIG;A0A287B6G6_PIG;A0A287BRA3_PIG;I3LGD9_PIG	Agrin	0.0109528	0.07564	0.549378	15.3847	14.4179	14.0606	14.2687	14.4054	14.2022	15.0589	15.1177	15.0619	14.2638	15.5201	15.0133	14.414	14.7888	14.6289	14.256	14.8177	14.7255	14.3677	14.4784	14.8439	14.9642	14.3986	14.5413
A0A286ZVH7;F1SL26;P50555	TNFRSF1A	A0A286ZVH7_PIG;F1SL26_PIG;TNR1A_PIG	Tumor necrosis factor receptor superfamily member 1A	0.0110987	0.07564	0.710131	12.4256	12.3805	11.2431	11.905	11.9042	12.2044	12.9192	12.6876	12.9481	12.1018	12.9624	12.7045	12.0036	12.0175	11.9913	12.141	11.8633	12.1168	12.3344	12.5751	10.9038	12.9823	12.5211	13.2211
A0A287AWS9;P32394	HMOX1	A0A287AWS9_PIG;HMOX1_PIG	Heme oxygenase;Heme oxygenase 1	0.0111388	0.07564	4.21262	0	12.4539	12.1947	12.7835	12.6139	14.0962	15.0013	15.4942	15.4443	13.8285	15.2512	14.3984	12.013	10.9674	13.8527	13.2638	12.661	11.5869	14.0508	14.709	13.1557	15.0335	14.6559	14.6391
A0A5G2QNX5	DSC2	A0A5G2QNX5_PIG	Desmocollin 2	0.0114105	0.07649	0.291566	16.4675	15.7412	15.6139	15.7147	15.3567	15.5423	16.212	15.873	15.5876	16.2125	15.981	16.3194	15.6378	16.2347	15.7655	15.6496	15.7631	15.4635	15.2965	15.4924	15.9126	15.9151	15.1513	15.2781
Q9N178	COL10A1	Q9N178_PIG	Type X collagen	0.0116795	0.07768	-1.27348	15.5934	14.7423	15.0474	14.6334	14.74	14.4063	14.0939	13.821	14.0025	14.0304	13.9091	11.6651	14.2214	14.2512	14.8455	14.3228	13.9559	14.6011	14.8011	13.0123	11.6446	13.9266	13.6761	14.6198
O11780	TGFBI	BGH3_PIG	Transforming growth factor-beta-induced protein ig-h3	0.0122755	0.08102	-0.768372	18.9657	19.1558	18.8097	18.9796	19.264	19.2779	18.4924	18.2214	18.3878	17.7602	19.3933	17.5874	19.2468	18.9513	18.9774	18.3257	18.3695	19.811	18.9586	18.2672	17.9999	17.9745	17.5563	18.1191
A0A5K1UCV8;F1RG45	AGT	A0A5K1UCV8_PIG;F1RG45_PIG	Angiotensinogen	0.0124409	0.08148	0.334846	22.6163	21.9464	22.7297	22.3019	22.5081	22.5925	22.6141	22.8548	22.6258	23.0663	22.8262	22.7169	22.414	22.9944	22.7672	22.3146	22.5609	22.377	22.6507	22.5964	22.6206	22.8548	22.5255	22.6565
A0A287B8M8;F1RVH7	IGFBP7	A0A287B8M8_PIG;F1RVH7_PIG	Uncharacterized protein	0.0130445	0.08479	0.421676	15.2117	14.8428	14.5225	14.6762	14.5751	14.6912	15.2746	15.21	14.9065	14.7785	15.5395	15.3405	14.483	14.9977	14.4823	14.4951	14.6792	15.0911	14.8234	14.9406	15.1021	14.7167	14.0152	14.7526
A0A286ZM84;A0A286ZTU7;A0A287AJE3	LOC106504547	A0A286ZM84_PIG;A0A286ZTU7_PIG;A0A287AJE3_PIG	SERPIN domain-containing protein	0.0138345	0.08925	2.50446	17.867	19.1596	13.02	17.3762	13.75	17.1432	19.9111	18.2334	19.1319	16.6492	20.5263	18.8908	18.7473	18.2926	20.234	20.9011	20.4416	20.863	18.3415	20.5868	20.4815	19.0844	19.7266	18.5164
A0A286ZMI3;A0A480TBA9;I3LIF2	CLSTN1	A0A286ZMI3_PIG;A0A480TBA9_PIG;I3LIF2_PIG	Calsyntenin 1	0.0146208	0.09362	-0.569872	14.9688	14.1135	14.0428	15.0102	14.0823	14.9638	13.9194	14.2408	14.1943	13.4195	13.746	14.2421	14.4955	14.0457	14.3081	13.9927	14.581	14.2799	13.9331	13.9639	14.4509	14.2218	13.9829	14.3905
A0A287BP22;A0A5G2QC98	FSTL1	A0A287BP22_PIG;A0A5G2QC98_PIG	Follistatin like 1	0.0149949	0.0953	0.454687	16.5281	16.8462	16.4881	16.3521	16.542	16.2927	16.9255	17.1399	16.8674	16.9493	17.3311	16.5641	16.8691	16.5101	16.7947	16.5259	16.5603	16.9913	16.6066	16.8635	16.845	16.5398	15.8114	16.0254
A0A5G2R274;P80276	AKR1B1	A0A5G2R274_PIG;ALDR_PIG	Aldo-keto reductase family 1 member B1	0.015168	0.09569	0.998947	12.8177	12.0178	12.2622	12.1667	12.7591	12.7793	12.8696	14.9249	13.8787	12.7035	14.0704	12.3493	12.5267	12.5826	12.8237	13.27	12.4033	13.0833	12.4031	13.0136	12.6359	13.2928	11.5686	13.1777
A0A287AXU0;A0A5G2R699;I3LP72	ELN	A0A287AXU0_PIG;A0A5G2R699_PIG;I3LP72_PIG	Elastin	0.0158808	0.09946	0.70538	14.9785	14.8395	15.2147	15.0356	15.729	14.9585	15.9025	16.44	15.5225	15.5553	16.496	15.0718	14.5977	14.6302	15.6552	14.5804	15.0019	15.5687	15.0845	15.6977	15.5099	15.3235	14.7757	14.9794

## Sheet: 12h_LOW_CON - HIGH_CON
Accession ID	Gene ID	Protein Name	Protein Description	rawP	adjp	log2FC	HIGH_CON	HIGH_CON	HIGH_CON	HIGH_CON	HIGH_CON	HIGH_CON	HIGH_SE	HIGH_SE	HIGH_SE	HIGH_SE	HIGH_SE	HIGH_SE	LOW_CON	LOW_CON	LOW_CON	LOW_CON	LOW_CON	LOW_CON	LOW_SE	LOW_SE	LOW_SE	LOW_SE	LOW_SE	LOW_SE
F1RM45	APOE	F1RM45_PIG	Apolipoprotein E	2.74776e-10	0	0.93349	18.4324	18.0177	17.7913	18.0182	17.8278	18.5979	17.391	17.7685	17.3098	17.3499	16.6934	18.2467	18.8975	19.3105	18.9152	19.0256	19.0653	19.0722	18.5006	18.3846	18.8456	18.6561	18.6623	18.8232
P18650	APOE	APOE_PIG	Apolipoprotein E	2.74225e-14	0	1.0521	22.0825	21.9966	21.7747	21.8904	21.7308	22.4575	21.6694	21.997	21.3529	21.6052	20.8291	21.8351	22.6456	23.1451	22.8979	23.1874	23.2556	23.1135	22.7856	22.4231	22.4865	22.8382	22.5788	22.4347
F1SFA7	COL1A2	F1SFA7_PIG	Fibrillar collagen NC1 domain-containing protein	1.11456e-08	0	-0.908764	18.879	19.2081	18.3815	19.2832	19.0747	18.9238	18.4356	18.7312	18.8649	18.5155	18.8806	18.0097	18.2716	17.9065	17.7874	17.9057	18.0094	18.417	17.5696	17.5011	17.7701	17.0747	17.1962	17.4864
F1S268	CREG1	F1S268_PIG	Cellular repressor of E1A stimulated genes 1	2.59792e-14	0	0.838798	14.4955	13.9305	14.4198	14.172	14.0006	14.2216	13.6944	13.9211	13.9948	13.9094	13.7016	14.3319	14.7558	15.1893	14.866	15.3038	15.2979	14.86	14.4616	14.3512	14.6726	14.6371	14.6524	14.2771
P20305	GSN	GELS_PIG	Gelsolin (Fragment)	1.12133e-14	0	0.579446	21.9642	22.1771	22.3991	21.9724	22.2593	22.0402	22.3266	21.912	21.8711	22.1581	22.1245	22.2274	22.503	22.7167	22.9563	22.7842	22.5853	22.7433	22.7135	22.4032	22.3884	22.628	22.4322	22.3914
A0A5G2QLU1;P27917	APOC3	A0A5G2QLU1_PIG;APOC3_PIG	Apolipoprotein C-III	1.07692e-14	0	1.19123	21.8064	21.5443	22	21.6764	22.0949	21.6066	21.6644	22.22	21.6798	21.8263	21.6657	22.1417	22.8368	22.9552	22.5761	23.3176	23.3601	22.8301	23.2507	22.6854	22.4168	23.3622	23.1026	22.5627
A0A286ZN92;A0A287AGI2;A0A287B8T0;A0A287BJL7;A0A5S6H3C2;A0A5S6I4J7;P23695	IGF2	A0A286ZN92_PIG;A0A287AGI2_PIG;A0A287B8T0_PIG;A0A287BJL7_PIG;A0A5S6H3C2_PIG;A0A5S6I4J7_PIG;IGF2_PIG	Insulin-like growth factor II	2.63313e-08	0	1.0193	17.8677	16.5972	16.9991	17.3398	16.7309	17.4111	16.8767	17.037	16.5418	16.9655	17.0931	17.2735	18.0587	18.1446	18.0761	18.3828	18.4845	17.9151	17.3088	17.101	17.8049	17.9449	17.3699	17.7631
F1SCE6;I3LMU0	SERPINA11	F1SCE6_PIG;I3LMU0_PIG	Serpin family A member 11	4.97283e-11	0	1.51899	13.689	13.0981	14.1211	12.5207	14.0028	13.7532	13.0544	14.0534	14.0631	13.4267	13.6509	13.1419	15.102	15.0565	14.6766	15.2995	15.0459	15.1185	14.8867	15.1077	14.6955	15.1134	14.171	14.682
C6JWG4	FGF21	C6JWG4_PIG	Fibroblast growth factor	0	0	-4.44153	16.1996	16.6355	14.5159	15.769	14.7292	15.2622	15.0653	15.1876	14.3242	15.2444	15.5799	15.7094	11.1495	11.5652	11.0434	11.4546	10.4291	10.8205	10.2195	12.8412	13.4388	12.7678	12.7982	12.7945
A0A480K168;F8S329	NA	A0A480K168_PIG;F8S329_PIG	Endogenous retrovirus group S71 member 1 Env polyprotein-like;Env protein	2.01036e-07	2e-05	-0.90157	14.6386	14.6611	14.172	14.8134	14.5564	14.6002	14.7179	15.2309	15.4756	15.3037	15.3105	15.0319	13.4297	13.8877	14.0684	13.711	12.9846	13.9507	13.8216	14.1064	14.521	14.7596	14.0903	14.0925
F6PSJ3	APOC2	F6PSJ3_PIG	Uncharacterized protein	5.23378e-07	4e-05	1.28577	19.2161	18.101	19.0846	18.9408	19.4116	18.6837	17.9019	19.3269	17.753	18.4789	18.4366	18.5526	20.0459	19.9013	19.9773	20.4218	20.5827	20.2233	19.6615	19.7261	19.1126	20.4226	20.2858	19.9317
A0A287ATG1	UCMA	A0A287ATG1_PIG	Upper zone of growth plate and cartilage matrix associated	8.34496e-07	6e-05	0.95121	14.832	14.2287	13.5923	14.1541	13.7687	13.7214	14.2333	14.3501	14.685	14.4067	14.8616	14.8204	14.9925	15.1412	14.6327	14.3071	15.242	15.6888	14.6065	14.3418	14.485	14.9739	14.5865	14.6016
A0A5G2QZ16;F1RWJ5	KPNB1	A0A5G2QZ16_PIG;F1RWJ5_PIG	Karyopherin subunit beta 1;Importin subunit beta-1	1.62913e-06	0.00012	1.30592	13.1585	13.6041	13.119	12.9522	13.1525	13.0948	13.3174	13.9304	13.9628	12.8556	13.0163	12.8415	13.6769	14.5436	14.1516	15.8291	14.3977	14.3177	12.863	13.3604	12.678	13.2983	13.1377	13.4121
A0A5G2QSL2;I3LJ52	CTRB2	A0A5G2QSL2_PIG;I3LJ52_PIG	Peptidase S1 domain-containing protein	4.03745e-06	0.00025	-1.44397	12.3531	11.9939	13.2951	12.3994	13.6739	11.6505	13.0036	13.7414	13.224	13.5805	14.2592	11.8474	10.6762	11.744	10.8012	11.2219	10.8331	11.4257	12.2924	12.1047	11.3603	12.0172	11.9208	11.1692
P24853	IGFBP2	IBP2_PIG	Insulin-like growth factor-binding protein 2	3.88054e-06	0.00025	1.1451	19.5176	18.0953	17.77	18.4785	17.9263	18.7298	18.286	18.4979	18.5501	18.4844	18.5336	19.1424	19.4493	19.8528	18.997	19.5036	20.0175	19.5679	18.281	18.5361	19.4553	20.0664	19.0015	19.4596
F1SJZ1	STC2	F1SJZ1_PIG	Stanniocalcin-2	5.20024e-06	0.0003	-0.537672	14.9424	14.6326	14.4917	14.356	14.2612	14.781	14.8279	14.8672	15.1554	15.2899	14.9203	15.0569	13.785	14.2156	14.0469	13.9392	14.0068	14.2454	14.0098	13.9119	14.3311	14.4529	14.0256	14.2275
A0A287A1S6;A0A287BLD2;A0A5G2QQE9	COL1A1	A0A287A1S6_PIG;A0A287BLD2_PIG;A0A5G2QQE9_PIG	Collagen alpha-1(I) chain preproprotein;Collagen type I alpha 1 chain;Collagen type I alpha 1 chain	1.26701e-05	0.00069	-0.788516	19.9652	20.3157	19.3152	20.4432	19.5755	20.0729	19.2656	19.696	19.8276	19.5324	20.0668	19.4119	19.284	19.1532	18.9231	19.1803	18.9675	19.4486	18.6021	18.2742	19.1308	18.4242	18.365	18.6217
O46409	APOA4	APOA4_PIG	Apolipoprotein A-IV	2.21596e-05	0.00108	-0.75215	18.8055	19.5111	18.9868	19.5551	18.8378	18.9096	19.6152	19.6528	19.4814	19.4633	19.0149	19.0774	18.273	18.4742	18.483	18.1659	18.2687	18.4282	18.0989	17.8173	18.4464	18.5614	18.8745	18.8606
I3LQH7	BLVRB	I3LQH7_PIG	Biliverdin reductase B	2.10219e-05	0.00108	0.998293	17.294	18.1727	17.3186	18.0794	17.55	17.5878	17.7804	18.1577	17.9305	18.1079	17.5349	17.5417	18.3301	18.5328	18.187	19.9969	18.5704	18.3751	17.515	17.5219	17.0982	17.6974	17.2429	17.712
A0A5G2Q6R4	HMCN2	A0A5G2Q6R4_PIG	Hemicentin 2	2.76307e-05	0.00128	-0.82741	16.5428	15.8282	16.3855	16.3789	15.901	16.4721	15.473	15.6756	16.2425	15.0692	16.49	15.2809	15.4543	15.853	15.8182	14.952	15.3953	15.0712	14.259	14.9044	15.5538	15.1215	15.7053	15.4215
A0A287A690;A0A287AJ76	PRDX2	A0A287A690_PIG;A0A287AJ76_PIG	Peroxiredoxin-2;Peroxiredoxin	2.96188e-05	0.00131	0.943332	19.0881	19.7638	19.0342	19.6203	19.2826	19.6117	19.2556	20.0164	19.9983	19.5828	19.0726	18.8382	20.0804	20.168	20.1221	21.3181	20.1698	20.2022	19.3139	19.4018	18.5296	19.1218	19.1139	19.4884
A0A287AWY5	PCDHGA4	A0A287AWY5_PIG	Protocadherin gamma subfamily A, 4	3.16644e-05	0.00134	-0.477641	15.8765	15.7004	15.6711	15.9018	15.6887	15.714	15.6402	15.7732	15.8209	15.8671	15.8239	15.384	14.9399	15.5247	15.4556	14.8907	15.4211	15.4545	15.0303	15.4282	15.6067	15.8308	15.5913	15.4238
A0A286ZIH0;A0A286ZZF0;A0A287BGS6;F1SAI8	HYOU1	A0A286ZIH0_PIG;A0A286ZZF0_PIG;A0A287BGS6_PIG;F1SAI8_PIG	Hypoxia up-regulated 1	4.53875e-05	0.00182	-1.37073	13.4337	14.0319	14.3195	14.3096	13.3625	14.1963	14.0655	13.7101	14.0125	13.2206	13.7006	12.146	11.9475	10.7617	13.4875	12.3798	13.6702	13.1825	13.6998	13.5867	11.803	13.157	13.3396	13.2759
A0A287BFI2;A0A5G2R5L4;K9J4M9	COLEC12	A0A287BFI2_PIG;A0A5G2R5L4_PIG;K9J4M9_PIG	Collectin subfamily member 12;Collectin subfamily member 12;Collectin sub-family member 12	4.69892e-05	0.00182	-1.57415	14.3876	13.6471	13.4186	13.9227	13.5567	13.4197	13.597	13.4244	13.7205	13.6421	14.0449	13.4091	12.577	10.0161	13.2148	11.9043	12.3786	12.8167	11.7166	11.7692	13.4375	12.9148	13.5586	13.5249
A0A480P2B4	SERPINA5	A0A480P2B4_PIG	Plasma serine protease inhibitor preproprotein	7.52742e-05	0.00279	0.551414	19.3621	19.2464	19.719	19.3035	19.7049	19.2363	19.3268	19.0236	18.7795	19.4847	18.984	19.5679	19.8008	19.7261	20.0409	20.0836	20.1799	20.0493	19.9113	19.7283	19.4471	19.92	19.5255	19.2717
F1RQW7	C2	F1RQW7_PIG	Uncharacterized protein	9.2226e-05	0.00329	-0.524849	14.3655	14.1522	13.8078	14.4409	13.7887	14.9901	14.715	14.6105	15.1783	14.4259	15.1223	14.6633	13.846	14.0345	13.3223	13.7538	13.9403	13.4992	14.2288	14.8979	15.6178	14.912	14.8945	14.7473
A0A286ZM84;A0A286ZTU7;A0A287AJE3	LOC106504547	A0A286ZM84_PIG;A0A286ZTU7_PIG;A0A287AJE3_PIG	SERPIN domain-containing protein	0.000131825	0.00453	3.52727	17.867	19.1596	13.02	17.3762	13.75	17.1432	19.9111	18.2334	19.1319	16.6492	20.5263	18.8908	18.7473	18.2926	20.234	20.9011	20.4416	20.863	18.3415	20.5868	20.4815	19.0844	19.7266	18.5164
P20112	SPARC	SPRC_PIG	SPARC	0.000158264	0.00525	-0.72529	15.3685	15.4725	15.1499	16.042	15.4591	15.4169	14.9591	15.3552	15.4799	15.0806	15.5134	14.707	14.364	14.7829	14.9948	14.2762	15.1613	14.9781	14.8612	14.9467	14.8352	13.999	14.5051	14.6562
A7YX24	SNCG	A7YX24_PIG	Gamma-synuclein	0.00017862	0.00572	1.48711	13.183	12.9209	12.958	13.347	12.3698	13.1582	13.0698	13.9972	12.2498	13.0321	13.3347	11.4778	14.5831	13.3544	15.0308	15.2994	14.948	13.6438	13.7391	13.9562	12.4129	13.8922	13.6396	13.8252
A0A5G2QEW1	ITIH4	A0A5G2QEW1_PIG	Inter-alpha-trypsin inhibitor heavy chain H4	0.000199598	0.00617	-0.448544	21.7388	21.9284	22.0343	22.5279	21.9005	22.0812	22.2219	21.8522	22.0869	22.1864	21.9285	22.2906	21.6921	21.6501	21.3315	22.1684	21.6593	21.0182	22.0002	22.4702	22.4737	22.1566	22.5111	22.3923
A0A287AB01;A0A5G2QBI5;A0A5G2QRV2;I3LNI2	TFG	A0A287AB01_PIG;A0A5G2QBI5_PIG;A0A5G2QRV2_PIG;I3LNI2_PIG	Trafficking from ER to golgi regulator	0.000245279	0.00734	3.82824	13.9393	15.9835	15.0548	14.0694	17.4791	14.8347	16.011	15.8164	14.6324	14.2325	15.7704	14.9426	15.5109	22.5156	16.5481	15.2494	22.3552	22.151	14.5301	17.5349	14.8736	12.5984	14.0671	14.3801
A0A287BEY3	LOC100624077	A0A287BEY3_PIG	Endogenous retrovirus group V member 2 Env polyprotein	0.000305923	0.00887	0.486494	17.1642	17.2117	16.7008	17.1749	16.8532	17.0825	16.1303	16.3387	15.8689	15.2927	16.1731	16.1884	17.8098	17.3888	17.4363	17.3091	17.6254	17.5367	16.4458	16.4084	16.2754	15.9783	16.352	15.9848
A0A5S6HM44;Q8SPS7	HP	A0A5S6HM44_PIG;HPT_PIG	Haptoglobin	0.00033413	0.0094	1.55873	19.7719	17.6183	18.6835	18.4046	18.3115	20.1801	20.8623	22.1451	21.6702	22.1871	20.2716	21.5354	21.2338	19.5738	19.7373	21.3209	20.4315	20.0251	22.3094	21.9958	22.6981	22.5007	22.2207	22.1373
A0A5G2QN51;I3LC80	SEMA7A	A0A5G2QN51_PIG;I3LC80_PIG	Semaphorin 7A (John Milton Hagen blood group)	0.000382213	0.00987	-0.480493	15.6408	15.0546	14.8632	14.7938	14.7581	15.0809	15.601	15.7801	15.8237	15.3695	16.0723	15.4712	14.2179	14.9955	14.873	14.3786	14.5885	14.2549	14.6045	14.762	14.9783	14.9767	14.9438	14.9
F1SB08;I3LVI7	NOTCH2	F1SB08_PIG;I3LVI7_PIG	Neurogenic locus notch homolog protein 2 isoform 1 preproprotein;Notch receptor 2	0.000394981	0.00987	-0.368967	16.347	16.0038	16.2213	16.4606	16.1835	16.2133	16.0756	15.7963	16.23	15.9801	15.7676	16.0555	15.7449	16.087	15.9009	15.494	16.1156	15.8734	15.6838	15.8363	15.6965	15.9225	16.0222	15.8717
F1S0Y1	HMCN2	F1S0Y1_PIG	Hemicentin 2	0.000397601	0.00987	-0.611206	16.6476	16.3026	16.4304	16.7154	16.1703	16.7383	15.7883	15.8513	16.7254	15.6337	16.5216	15.9154	15.9464	16.5081	16.2633	15.3636	15.6801	15.5757	15.2966	15.4684	16.0078	15.6873	15.8915	16.0476
Q711S8	SPP2	SPP24_PIG	Secreted phosphoprotein 24	0.000370159	0.00987	0.486451	18.0751	17.3539	18.0945	17.9277	18.2015	17.9709	17.6416	18.059	17.4673	18.0242	17.8311	18.0751	18.2416	18.5291	18.3632	18.5013	18.6771	18.2299	18.4311	18.6173	18.6348	18.4785	18.347	18.2535
A0A287A6K7	APMAP	A0A287A6K7_PIG	Adipocyte plasma membrane associated protein	0.000404128	0.00987	-0.786127	17.8276	17.9914	18.0807	17.9597	17.6676	17.7419	17.833	17.6049	17.6263	17.8031	17.4823	17.1253	16.1281	17.0714	17.8117	16.9667	17.8846	16.6896	17.6321	17.9538	17.3403	17.9	17.8595	17.6512
Q2LE37	APOM	APOM_PIG	Apolipoprotein M	0.000468361	0.01114	0.295965	21.7397	21.8821	21.8937	21.4358	21.6457	21.5033	21.4938	21.4521	21.4863	21.5741	21.4557	21.6881	21.7757	21.8726	21.9725	22.1551	22.2256	21.8747	21.8421	21.8254	21.737	21.7789	21.7722	21.5892
A0A286ZMU5;A0A287BBM1;A0A287BHL0;A0A480Q0J7;A0A5G2Q7Y5;A0A5G2QDP8;A0A5G2QGE1;A0A5G2QU32;A0A5G2QVL8;A0A5G2R625;A0A5G2R731;A0A5G2REH8;F1SFQ4;I3LEC2;I3LRF8	PCBP3;PCBP3;PCBP2;PCBP2;PCBP3;PCBP2;PCBP2;PCBP2;PCBP2;PCBP2;PCBP3;PCBP2;PCBP2;PCBP1;PCBP3	A0A286ZMU5_PIG;A0A287BBM1_PIG;A0A287BHL0_PIG;A0A480Q0J7_PIG;A0A5G2Q7Y5_PIG;A0A5G2QDP8_PIG;A0A5G2QGE1_PIG;A0A5G2QU32_PIG;A0A5G2QVL8_PIG;A0A5G2R625_PIG;A0A5G2R731_PIG;A0A5G2REH8_PIG;F1SFQ4_PIG;I3LEC2_PIG;I3LRF8_PIG	Uncharacterized protein;Uncharacterized protein;Poly(rC) binding protein 2;Poly(RC)-binding protein 2 isoform a;Uncharacterized protein;Poly(rC) binding protein 2;Poly(rC) binding protein 2;Poly(rC) binding protein 2;Poly(rC) binding protein 2;Poly(rC) binding protein 2;Uncharacterized protein;Poly(rC) binding protein 2;Poly(rC) binding protein 2;Poly(rC) binding protein 1;Uncharacterized protein	0.000551567	0.0128	1.32834	13.6681	13.3807	11.4553	12.9247	13.2786	12.9524	13.3535	14.518	13.9545	12.8914	14.0306	12.8128	13.5175	14.0409	13.8972	15.9353	13.8743	14.3647	13.5716	13.5461	13.6571	13.414	13.7457	13.6753
A0A287ALI8	SCRG1	A0A287ALI8_PIG	Stimulator of chondrogenesis 1	0.000567465	0.01284	0.531949	15.3823	14.9387	15.0792	14.9685	15.1466	14.7688	15.508	15.1633	14.9596	15.0784	15.4952	15.789	15.7066	15.522	15.7914	15.332	15.8583	15.2655	15.8922	15.5022	15.4379	15.5576	15.1444	15.0086
A0A287AW67;F1SD70	LGMN	A0A287AW67_PIG;F1SD70_PIG	Legumain	0.000594825	0.0129	0.567005	15.1664	14.5281	15.154	14.7626	14.871	14.2771	14.7651	15.1247	15.1974	15.0928	15.1421	14.6561	15.1108	15.3742	15.2598	15.337	16.0269	15.0527	14.5859	14.8585	15.2447	14.7808	14.8414	14.7179
P82460	TXN	THIO_PIG	Thioredoxin	0.000597651	0.0129	0.81227	13.8767	13.9058	13.2288	13.6781	13.4896	13.498	14.136	14.369	13.8128	13.9319	14.0906	13.2271	14.2317	14.101	14	15.5215	14.4916	14.2049	13.9939	13.8598	13.3249	13.5288	13.5451	14.1106
A0A286ZND5;F1S3U9	PRDX1	A0A286ZND5_PIG;F1S3U9_PIG	Peroxiredoxin	0.000631598	0.01302	0.754685	15.6377	15.4706	15.5818	15.5009	15.4955	15.3716	15.7599	16.613	15.8505	15.8521	16.0203	15.4224	16.0007	16.0417	15.866	17.4574	16.0033	16.2171	15.2038	15.4299	15.3593	15.3856	15.3078	15.5763
A0A5G2RCQ0;I3LB80	SLC3A2	A0A5G2RCQ0_PIG;I3LB80_PIG	Solute carrier family 3 member 2	0.0006299	0.01302	-0.323687	14.8942	15.1388	14.9501	15.0807	15.0143	15.2354	15.1642	15.0399	15.3944	15.3394	15.1555	14.5041	14.9194	14.6776	14.8598	14.8326	14.8207	14.2612	14.7203	14.6742	14.8048	14.6357	14.7775	14.6251
A0A5G2QM06	FBN2	A0A5G2QM06_PIG	Fibrillin 2	0.000682285	0.01376	-0.26695	15.112	14.9429	15.165	15.3886	14.951	15.0642	14.9512	14.6864	14.7855	14.8241	14.6794	14.7471	14.7732	14.8588	14.7183	14.752	15.1313	14.7884	14.6188	14.8839	14.4852	14.7599	14.6567	14.6292
F1RGX4	LOC100737768	F1RGX4_PIG	GLOBIN domain-containing protein	0.000780863	0.01542	0.809065	24.5387	25.3894	24.8745	25.1645	25.1017	25.1839	25.007	25.4418	25.5011	25.2466	24.5755	24.4316	25.8644	25.414	25.6527	26.8764	25.4598	25.8399	24.9756	24.839	24.4139	24.7649	24.4519	24.711
A0A5G2RJ79	APOC2	A0A5G2RJ79_PIG	Uncharacterized protein	0.000820548	0.01586	1.01928	14.4954	14.7104	14.8991	14.065	15.4529	13.8189	15.1244	15.1116	13.3947	15.3392	14.8537	13.1147	15.3697	15.8524	15.4022	15.6389	15.4411	15.8531	15.8078	15.3493	13.7043	15.2965	14.4768	14.6278
Q8HZW2	MYOC	Q8HZW2_PIG	Myocilin	0.00098285	0.01861	-0.639169	16.6016	16.4395	15.8236	16.5826	16.3374	16.107	15.6912	16.5103	16.298	15.6688	16.4737	16.5318	15.912	15.9449	15.0268	15.2939	16.007	15.8722	16.1132	16.1331	16.263	15.7235	15.7276	15.8067
A0A287AC25;A0A2C9F362;A0A2C9F3F9;A0A5G2QR94;F1SRJ7;I3LBI3;K7GM05;K7GR74;P16545	IGF1	A0A287AC25_PIG;A0A2C9F362_PIG;A0A2C9F3F9_PIG;A0A5G2QR94_PIG;F1SRJ7_PIG;I3LBI3_PIG;K7GM05_PIG;K7GR74_PIG;IGF1_PIG	Insulin-like growth factor I;Insulin-like growth factor I;Insulin-like growth factor I;Insulin-like growth factor I;Insulin-like growth factor 1 transcript variant 6;Insulin-like growth factor I;Insulin-like growth factor I;Insulin-like growth factor I;Insulin-like growth factor I	0.00105788	0.01963	-0.813954	14.7104	14.5432	14.906	14.7802	15.1318	14.9083	14.9378	14.2041	14.0721	14.4249	14.4828	12.9033	13.232	13.9527	14.2356	14.1969	14.0701	14.4089	14.0331	14.208	12.992	14.1128	14.1585	14.2052
F1RN40	F7	F1RN40_PIG	Uncharacterized protein	0.00111387	0.02027	1.18172	13.4658	12.3523	14.2567	14.3262	13.1076	14.4333	13.1401	13.7531	12.9623	14.0252	12.5651	13.8376	14.4049	14.822	14.2644	15.4196	15.1874	14.9342	14.2489	14.1932	14.5291	15.385	15.0184	14.7271
A0A287BM29;F1SJT7	APOA4	A0A287BM29_PIG;F1SJT7_PIG	Apolipoprotein A-IV	0.00131174	0.02341	-0.547916	19.3859	20.4441	20.0182	20.3621	19.9675	19.897	20.2725	20.6383	20.7137	20.5288	20.3185	20.0502	19.346	19.704	19.8554	19.1322	19.3042	19.4456	19.2172	19.0454	19.7402	19.3964	19.6209	19.4089
A0A286ZTA8;A0A287BPM1;A0A480VXI4;F1RXW0;Q59IP2	COL5A2	A0A286ZTA8_PIG;A0A287BPM1_PIG;A0A480VXI4_PIG;F1RXW0_PIG;Q59IP2_PIG	Collagen type V alpha 2 chain;Collagen type V alpha 2 chain;Collagen alpha-2(V) chain preproprotein;Collagen alpha-2(V) chain preproprotein;Collagen alpha-2(V) chain	0.00159156	0.02787	-1.53864	16.1126	15.6258	14.9335	16.3337	15.5108	16.5657	15.1509	15.3679	16.008	13.9863	16.1928	13.7624	13.4656	14.526	14.7149	12.7834	14.7843	15.5761	13.0852	13.6692	13.8951	13.922	14.3898	14.2253
E0A8P1	IGFBP1	E0A8P1_PIG	Insulin-like growth factor-binding protein 1	0.00171937	0.02955	2.10059	12.342	13.8054	11.1269	12.3395	11.6742	14.4462	13.5293	17.4535	14.6822	15.4926	16.2656	15.9424	15.0788	14.1206	15.1849	13.3527	15.8827	14.7181	13.7752	15.6263	14.4246	15.4427	14.4114	14.8322
A0A5G2R5Z3;F1SAG9;K7GKE2;K7GP49	MCAM	A0A5G2R5Z3_PIG;F1SAG9_PIG;K7GKE2_PIG;K7GP49_PIG	Melanoma cell adhesion molecule	0.00204661	0.03453	-0.225265	17.2617	17.0743	16.9782	17.1678	16.9066	17.0755	17.1297	16.8866	17.1242	17.0276	16.9647	16.9387	16.8056	16.8512	16.8169	16.6901	16.8943	17.0544	16.771	16.7845	16.6123	16.773	16.947	16.8902
A2TLM1;F1STC1	RPIA	RPIA_PIG;F1STC1_PIG	Ribose-5-phosphate isomerase	0.00218221	0.03616	0.930667	12.0316	12.4263	11.3115	11.9925	11.8556	12.3053	12.5487	14.2021	13.2913	12.7098	13.1445	12.6576	13.3452	12.6249	12.3074	13.8928	12.7463	12.5902	12.6566	12.6879	12.349	12.5384	11.7232	12.1918
A0A5G2R1R6;F1SPS7;I3LFX8;P19205	APEH	A0A5G2R1R6_PIG;F1SPS7_PIG;I3LFX8_PIG;ACPH_PIG	Acylamino-acid-releasing enzyme	0.00225276	0.03668	1.43486	11.6145	13.1226	11.9861	13.293	12.3755	12.55	12.4107	13.0123	12.7669	12.7838	12.0584	11.3791	12.7214	13.6607	13.8071	15.7281	13.6116	14.0218	12.4584	12.6782	10.8262	12.0562	12.4529	12.9067
F1RPW2	F5	F1RPW2_PIG	Coagulation factor V	0.00326704	0.05226	0.648134	16.8739	16.7564	17.2624	16.4068	16.6783	15.3327	16.6558	16.3763	15.5007	15.5625	16.1683	16.6751	17.0583	17.3786	17.3943	17.3803	17.0655	16.9224	17.1122	16.8391	16.8527	16.585	16.8525	16.813
P80928	MIF	MIF_PIG	Macrophage migration inhibitory factor	0.00332253	0.05226	0.664489	16.9184	17.1246	16.5477	16.9306	17.0258	16.9995	16.8511	18.0106	17.4423	17.2016	17.5837	16.4666	17.4463	17.1449	17.4373	18.2916	17.4022	17.8112	16.6795	16.798	16.4666	16.7227	16.6774	16.5128
A0A287AX04;A0A5G2QIG1;A0A5K1UHA8;F1RYU5;K7GSK1	ART3	A0A287AX04_PIG;A0A5G2QIG1_PIG;A0A5K1UHA8_PIG;F1RYU5_PIG;K7GSK1_PIG	NAD(P)(+)--arginine ADP-ribosyltransferase	0.00364713	0.05641	-0.526366	15.4299	15.5119	15.2321	15.0842	15.5352	15.1247	15.6907	15.5272	15.29	15.3835	14.9969	15.2789	14.2522	15.208	15.3737	14.4787	14.2869	15.1603	15.2107	15.7299	15.4433	15.1197	14.7994	15.2078
A0A286ZJ21;A0A287ADL0;I3LEW0	COLEC11	A0A286ZJ21_PIG;A0A287ADL0_PIG;I3LEW0_PIG	Collectin subfamily member 11	0.00492024	0.07364	-0.225455	17.2025	16.9531	16.9932	16.8296	16.9196	17.1232	16.7237	16.7212	16.6636	16.632	16.425	16.7702	16.8247	17.1647	16.6652	16.5948	16.9055	16.5136	16.3926	16.5339	16.605	16.4567	16.5268	16.2827
A0A287BGW4	ALAD	A0A287BGW4_PIG	Delta-aminolevulinic acid dehydratase	0.00485603	0.07364	1.02879	13.9281	12.4576	13.2842	12.8253	13.0047	11.847	13.7187	13.7579	13.5586	13.5678	13.7143	13.9555	12.9213	14.178	13.7167	15.2399	13.4078	14.0561	13.437	12.4584	13.3398	12.5429	14.2804	13.1922
A0A286ZV56;A0A287AP40;A0A287BIN3;A0A288CG38	CACNA2D1	A0A286ZV56_PIG;A0A287AP40_PIG;A0A287BIN3_PIG;A0A288CG38_PIG	Calcium voltage-gated channel auxiliary subunit alpha2delta 1	0.00509155	0.075	-0.418333	15.4233	15.3691	15.3241	15.7839	15.3416	15.6286	15.2959	15.3679	15.3263	15.6013	15.1712	15.6129	14.4831	15.3293	15.1129	14.9778	15.5889	14.8687	14.6757	15.1864	15.266	15.2199	15.1386	15.1235
P02067	HBB	HBB_PIG	Hemoglobin subunit beta	0.00536868	0.07665	0.646963	25.5495	26.3005	25.922	26.0519	26.0442	25.9611	26.0194	26.3376	25.9812	26.3137	25.5867	25.4467	26.5831	26.1996	26.564	27.6153	26.0944	26.6545	25.9038	25.8433	25.3449	25.8299	25.4224	25.6391
A0A286ZQI5;A0A286ZZM6;A0A287AQ76;A0A287ASJ8	CHL1	A0A286ZQI5_PIG;A0A286ZZM6_PIG;A0A287AQ76_PIG;A0A287ASJ8_PIG	Cell adhesion molecule L1 like	0.00536891	0.07665	-0.283412	16.4998	16.5407	16.4627	16.7873	16.2625	16.3746	16.3194	16.3206	16.4641	16.443	16.2241	16.4672	15.9185	16.2756	16.1174	16.2988	16.465	16.1518	15.6449	16.073	16.2218	16.2467	16.2081	15.9345
A0A287BG16	B4GALT1	A0A287BG16_PIG	Beta-1,4-galactosyltransferase 1	0.00620505	0.08725	-0.231212	16.2461	16.1496	16.1039	16.1794	16.1947	16.3906	16.4477	16.2347	16.2231	16.1674	16.2479	16.0574	15.6752	16.1052	16.234	15.7708	15.9457	16.1462	15.978	16.0101	16.1241	16.0782	15.9521	15.9008
Q9N1F5	GSTO1	GSTO1_PIG	Glutathione S-transferase omega-1	0.00658468	0.0912	0.672903	15.2085	15.6018	14.977	15.3667	15.2348	15.2587	14.9057	15.8657	15.7086	15.9402	15.3693	14.5109	15.9865	15.6243	15.6448	16.8201	15.6378	15.9713	15.431	15.3621	15.2446	15.368	15.5895	15.4953

## Sheet: 12h_HIGH_SE - LOW_SE
Accession ID	Gene ID	Protein Name	Protein Description	rawP	adjp	log2FC	HIGH_CON	HIGH_CON	HIGH_CON	HIGH_CON	HIGH_CON	HIGH_CON	HIGH_SE	HIGH_SE	HIGH_SE	HIGH_SE	HIGH_SE	HIGH_SE	LOW_CON	LOW_CON	LOW_CON	LOW_CON	LOW_CON	LOW_CON	LOW_SE	LOW_SE	LOW_SE	LOW_SE	LOW_SE	LOW_SE
F1RM45	APOE	F1RM45_PIG	Apolipoprotein E	7.34952e-11	0	-1.18553	18.4324	18.0177	17.7913	18.0182	17.8278	18.5979	17.391	17.7685	17.3098	17.3499	16.6934	18.2467	18.8975	19.3105	18.9152	19.0256	19.0653	19.0722	18.5006	18.3846	18.8456	18.6561	18.6623	18.8232
P18650	APOE	APOE_PIG	Apolipoprotein E	2.66454e-14	0	-1.04299	22.0825	21.9966	21.7747	21.8904	21.7308	22.4575	21.6694	21.997	21.3529	21.6052	20.8291	21.8351	22.6456	23.1451	22.8979	23.1874	23.2556	23.1135	22.7856	22.4231	22.4865	22.8382	22.5788	22.4347
F1SFA7	COL1A2	F1SFA7_PIG	Fibrillar collagen NC1 domain-containing protein	1.43707e-12	0	1.13987	18.879	19.2081	18.3815	19.2832	19.0747	18.9238	18.4356	18.7312	18.8649	18.5155	18.8806	18.0097	18.2716	17.9065	17.7874	17.9057	18.0094	18.417	17.5696	17.5011	17.7701	17.0747	17.1962	17.4864
P20305	GSN	GELS_PIG	Gelsolin (Fragment)	1.53947e-08	0	-0.389517	21.9642	22.1771	22.3991	21.9724	22.2593	22.0402	22.3266	21.912	21.8711	22.1581	22.1245	22.2274	22.503	22.7167	22.9563	22.7842	22.5853	22.7433	22.7135	22.4032	22.3884	22.628	22.4322	22.3914
A0A5G2QLU1;P27917	APOC3	A0A5G2QLU1_PIG;APOC3_PIG	Apolipoprotein C-III	3.28251e-11	0	-1.03043	21.8064	21.5443	22	21.6764	22.0949	21.6066	21.6644	22.22	21.6798	21.8263	21.6657	22.1417	22.8368	22.9552	22.5761	23.3176	23.3601	22.8301	23.2507	22.6854	22.4168	23.3622	23.1026	22.5627
C6JWG4	FGF21	C6JWG4_PIG	Fibroblast growth factor	1.61888e-10	0	2.70846	16.1996	16.6355	14.5159	15.769	14.7292	15.2622	15.0653	15.1876	14.3242	15.2444	15.5799	15.7094	11.1495	11.5652	11.0434	11.4546	10.4291	10.8205	10.2195	12.8412	13.4388	12.7678	12.7982	12.7945
A0A480K168;F8S329	NA	A0A480K168_PIG;F8S329_PIG	Endogenous retrovirus group S71 member 1 Env polyprotein-like;Env protein	3.89839e-08	0	0.946483	14.6386	14.6611	14.172	14.8134	14.5564	14.6002	14.7179	15.2309	15.4756	15.3037	15.3105	15.0319	13.4297	13.8877	14.0684	13.711	12.9846	13.9507	13.8216	14.1064	14.521	14.7596	14.0903	14.0925
F6PSJ3	APOC2	F6PSJ3_PIG	Uncharacterized protein	3.06147e-08	0	-1.44843	19.2161	18.101	19.0846	18.9408	19.4116	18.6837	17.9019	19.3269	17.753	18.4789	18.4366	18.5526	20.0459	19.9013	19.9773	20.4218	20.5827	20.2233	19.6615	19.7261	19.1126	20.4226	20.2858	19.9317
F1SJZ1	STC2	F1SJZ1_PIG	Stanniocalcin-2	1.08691e-13	0	0.859803	14.9424	14.6326	14.4917	14.356	14.2612	14.781	14.8279	14.8672	15.1554	15.2899	14.9203	15.0569	13.785	14.2156	14.0469	13.9392	14.0068	14.2454	14.0098	13.9119	14.3311	14.4529	14.0256	14.2275
A0A287A1S6;A0A287BLD2;A0A5G2QQE9	COL1A1	A0A287A1S6_PIG;A0A287BLD2_PIG;A0A5G2QQE9_PIG	Collagen alpha-1(I) chain preproprotein;Collagen type I alpha 1 chain;Collagen type I alpha 1 chain	1.23398e-09	0	1.06372	19.9652	20.3157	19.3152	20.4432	19.5755	20.0729	19.2656	19.696	19.8276	19.5324	20.0668	19.4119	19.284	19.1532	18.9231	19.1803	18.9675	19.4486	18.6021	18.2742	19.1308	18.4242	18.365	18.6217
O46409	APOA4	APOA4_PIG	Apolipoprotein A-IV	6.40569e-08	0	0.940998	18.8055	19.5111	18.9868	19.5551	18.8378	18.9096	19.6152	19.6528	19.4814	19.4633	19.0149	19.0774	18.273	18.4742	18.483	18.1659	18.2687	18.4282	18.0989	17.8173	18.4464	18.5614	18.8745	18.8606
A0A5G2QN51;I3LC80	SEMA7A	A0A5G2QN51_PIG;I3LC80_PIG	Semaphorin 7A (John Milton Hagen blood group)	4.13549e-10	0	0.825471	15.6408	15.0546	14.8632	14.7938	14.7581	15.0809	15.601	15.7801	15.8237	15.3695	16.0723	15.4712	14.2179	14.9955	14.873	14.3786	14.5885	14.2549	14.6045	14.762	14.9783	14.9767	14.9438	14.9
A0A287BM29;F1SJT7	APOA4	A0A287BM29_PIG;F1SJT7_PIG	Apolipoprotein A-IV	5.06273e-11	0	1.01548	19.3859	20.4441	20.0182	20.3621	19.9675	19.897	20.2725	20.6383	20.7137	20.5288	20.3185	20.0502	19.346	19.704	19.8554	19.1322	19.3042	19.4456	19.2172	19.0454	19.7402	19.3964	19.6209	19.4089
A0A5G2QJT3;F1RHA9	LECT2	A0A5G2QJT3_PIG;F1RHA9_PIG	Leukocyte cell-derived chemotaxin-2;Leukocyte cell derived chemotaxin 2	3.09971e-09	0	-1.50826	12.2563	10.3146	10.9596	11.3869	10.9525	11.4562	10.5743	10.6745	9.75638	9.84768	8.9929	11.0779	11.7101	12.4126	11.7594	11.7012	12.3475	11.6239	11.9882	11.5141	11.8336	11.4578	11.5063	11.6732
P50828	HPX	HEMO_PIG	Hemopexin	1.69753e-13	0	-1.19997	17.9557	17.6299	17.5577	18.0555	18.0391	17.9128	17.5796	17.4536	17.651	17.2411	17.6081	18.278	17.935	18.9561	17.663	18.1233	18.2278	17.9125	18.9304	18.665	18.8714	18.7503	18.9022	18.8918
F1S4I1	GOLM1	F1S4I1_PIG	Golgi membrane protein 1	1.0504e-10	0	0.207414	20.6031	20.4222	20.307	20.2939	20.1005	20.5866	20.2498	20.1419	20.4583	20.3496	20.19	20.5118	20.3658	20.3685	20.1523	20.272	20.3619	20.1942	20.1063	20.0594	20.1087	20.0664	20.2121	20.1039
A0A287AU22;A0A287B8K4	PLVAP	A0A287AU22_PIG;A0A287B8K4_PIG	Plasmalemma vesicle associated protein	8.63796e-08	0	0.989339	13.9704	13.6862	13.9741	14.2	13.706	13.227	14.5477	14.7781	14.9189	14.3345	15.0729	14.2962	14.2048	13.9379	14.4471	14.0131	14.1432	14.4451	13.6527	13.2119	13.6104	14.4993	13.634	13.4041
A0A5G2QKI1;Q8MJ39	MGP	A0A5G2QKI1_PIG;MGP_PIG	Matrix Gla protein	1.88475e-09	0	0.690357	18.4215	18.3704	18.2237	17.9555	17.9824	18.1678	19.8921	19.5982	20.0348	19.5617	19.814	19.3103	18.1826	17.957	17.9383	17.7582	18.1293	17.785	19.0567	19.3257	18.8466	19.0899	18.9597	18.7904
F1SJM0	PTX3	F1SJM0_PIG	Pentraxin-3	7.5482e-09	0	1.59208	14.1609	14.4653	14.0478	14.4633	13.9927	13.7478	14.9583	15.771	16.5278	15.9933	16.6237	14.2572	14.2854	13.9883	14.3539	13.7298	14.1325	14.1343	14.1754	14.7769	14.4975	14.074	13.5726	13.4823
A0A287AL89;A0A5G2QCT3;F1SM61	FBLN1	A0A287AL89_PIG;A0A5G2QCT3_PIG;F1SM61_PIG	Fibulin-1	1.07234e-07	0	0.469884	21.5564	21.5003	21.6022	21.5028	21.6489	21.0037	21.5813	21.4472	21.3293	21.5483	21.5006	21.4911	21.371	21.4603	21.4237	21.1549	21.377	21.2434	20.9801	20.9168	20.954	21.2645	21.0258	20.9372
A0A5G2QVP2;I3L8B2	COL9A2	A0A5G2QVP2_PIG;I3L8B2_PIG	Uncharacterized protein	1.35679e-08	0	2.079	11.8564	12.3335	12.6858	13.6899	13.2803	13.4702	13.5276	13.6402	13.3297	12.4309	13.8888	13.2541	11.8462	11.6276	11.994	12.698	13.5209	13.2724	11.0902	12.3177	11.7759	11.0474	10.356	11.0101
F1S8R6	C8H4orf48	F1S8R6_PIG	Uncharacterized protein	2.01533e-07	1e-05	0.226791	16.6377	16.5021	16.4462	16.8709	16.3039	16.5421	16.2589	16.1187	16.4808	16.625	16.1707	16.5263	16.5791	16.4511	16.262	16.359	16.5851	16.1049	16.1054	16.0565	16.1993	16.2672	16.1539	16.0373
F1RQ17	ADGRF5	F1RQ17_PIG	Adhesion G protein-coupled receptor F5	4.33644e-07	2e-05	0.618647	15.4373	15.4202	15.4954	15.668	15.2614	15.0806	15.8939	15.87	16.2312	15.7348	15.7853	15.3303	15.3195	15.4351	15.4472	15.2018	14.7794	15.1027	15.0869	15.3559	15.2257	15.0495	15.3232	15.0924
F1SCE6;I3LMU0	SERPINA11	F1SCE6_PIG;I3LMU0_PIG	Serpin family A member 11	9.18473e-07	3e-05	-1.21101	13.689	13.0981	14.1211	12.5207	14.0028	13.7532	13.0544	14.0534	14.0631	13.4267	13.6509	13.1419	15.102	15.0565	14.6766	15.2995	15.0459	15.1185	14.8867	15.1077	14.6955	15.1134	14.171	14.682
F1SBS4	C3	F1SBS4_PIG	Complement C3	9.35431e-07	3e-05	-0.378977	22.5691	22.6685	22.7848	22.751	22.6753	22.5644	22.6432	22.3612	22.7923	22.582	22.5937	22.7135	22.5601	22.9026	22.7697	22.8367	22.8157	22.6987	23.1933	22.9522	23.0203	22.7069	23.1418	22.9451
A0A287AUK6;F1RGR4	EFNA1	A0A287AUK6_PIG;F1RGR4_PIG	Ephrin-A1	1.24752e-06	4e-05	0.918252	14.8839	13.9489	13.8358	13.7643	13.9393	14.175	14.3701	14.8227	14.2466	14.1576	14.8801	14.6322	13.7924	14.0579	13.8314	13.3263	14.0906	13.6573	13.167	13.8442	13.3779	13.6513	13.745	13.8143
F1S8V7	CPN1	F1S8V7_PIG	Carboxypeptidase N catalytic chain	1.64769e-06	5e-05	-0.608916	14.8621	14.925	15.2766	14.9731	15.1945	15.4214	14.8372	15.3068	15.3776	15.1414	15.1577	15.3864	15.423	15.4878	15.2728	15.8665	15.5187	14.9776	15.7184	15.7747	15.8549	15.6689	15.8452	15.9985
A0A287AU27	DSPP	A0A287AU27_PIG	Uncharacterized protein	2.4082e-06	7e-05	1.21139	14.2976	13.9507	14.1794	14.3058	14.3846	14.8922	14.6984	15.2828	15.6067	14.3386	16.0726	14.7965	14.4877	13.7851	14.0133	13.0762	14.6287	14.0375	14.0373	13.9201	13.2808	13.9352	14.1037	14.2501
P14287	SPP1	OSTP_PIG	Osteopontin	2.78963e-06	8e-05	0.828839	18.9897	18.4138	18.1699	17.7032	18.2447	18.1799	19.5846	19.0014	19.1318	19.1335	19.7069	19.316	18.1509	18.4799	18.1791	17.9005	18.7114	17.9788	18.3223	18.64	18.8163	18.414	18.4366	18.2719
A0A287A016;A0A287BE48	PLXDC2	A0A287A016_PIG;A0A287BE48_PIG	Plexin domain containing 2	3.39696e-06	0.0001	0.303832	17.7787	17.3746	17.331	17.5928	17.1874	17.3872	17.6579	17.6318	17.9799	17.5127	17.8135	17.8808	17.601	17.5388	17.3323	17.1668	17.7241	17.2759	17.1548	17.4256	17.482	17.4718	17.7014	17.4181
A0A5G2RCQ0;I3LB80	SLC3A2	A0A5G2RCQ0_PIG;I3LB80_PIG	Solute carrier family 3 member 2	4.18751e-06	0.00012	0.393313	14.8942	15.1388	14.9501	15.0807	15.0143	15.2354	15.1642	15.0399	15.3944	15.3394	15.1555	14.5041	14.9194	14.6776	14.8598	14.8326	14.8207	14.2612	14.7203	14.6742	14.8048	14.6357	14.7775	14.6251
Q711S8	SPP2	SPP24_PIG	Secreted phosphoprotein 24	5.80428e-06	0.00016	-0.610645	18.0751	17.3539	18.0945	17.9277	18.2015	17.9709	17.6416	18.059	17.4673	18.0242	17.8311	18.0751	18.2416	18.5291	18.3632	18.5013	18.6771	18.2299	18.4311	18.6173	18.6348	18.4785	18.347	18.2535
A0A287BKI9	B3GNT7	A0A287BKI9_PIG	Hexosyltransferase	6.06009e-06	0.00016	0.449586	15.2995	14.7748	15.0621	15.0613	14.6308	15.1003	15.5013	15.1089	15.3876	15.4786	15.3319	15.4149	14.6916	15.1322	14.97	14.6116	14.6312	15.0286	14.6529	14.8227	15.3321	15.0557	14.9733	14.6891
A0A286ZQ00	LOC100515857	A0A286ZQ00_PIG	C-C motif chemokine	7.06612e-06	0.00018	-1.20077	14.1556	12.0048	13.4344	13.3705	13.7155	13.4968	13.3507	13.1903	12.67	12.59	13.2981	13.154	13.7443	14.0249	14.1031	14.0293	14.8159	14.1541	14.1056	14.2775	13.7762	14.7139	14.3827	14.2017
F1SAE9	LAMB1	F1SAE9_PIG	Laminin subunit beta 1	1.14897e-05	0.00028	0.105242	18.379	18.4081	17.9233	18.5216	17.9867	18.3505	17.9016	18.1188	18.7691	18.1629	18.1921	18.4192	18.3989	18.5397	18.0278	18.1963	18.5063	18.1624	18.1098	18.1743	17.9608	18.2185	18.2011	18.2677
A0A286ZKB4;A0A287AIM8	C5	A0A286ZKB4_PIG;A0A287AIM8_PIG	Complement C5a anaphylatoxin	1.16854e-05	0.00028	-0.393454	19.596	19.7656	19.8485	19.7502	19.7905	20.0097	19.8102	19.5717	19.839	19.9938	19.8281	19.8602	19.8949	20.0905	19.8042	19.9761	20.0827	19.6305	20.1816	20.3056	20.2953	20.158	20.3658	19.9572
A0A287ALH4;A0A287AQG0;A0A287B901;A0A2C9F3C8;K7GNA9;K7GPI3;K7GS31;Q95242	PECAM1	A0A287ALH4_PIG;A0A287AQG0_PIG;A0A287B901_PIG;A0A2C9F3C8_PIG;K7GNA9_PIG;K7GPI3_PIG;K7GS31_PIG;PECA1_PIG	Platelet endothelial cell adhesion molecule	1.74593e-05	0.00039	0.438913	17.3135	16.965	16.7755	17.0342	16.6783	16.9242	17.5074	17.2462	17.6717	17.1007	17.3621	17.5079	17.0598	17.0198	17.0113	16.8006	17.1313	17.0638	16.8549	16.7526	16.9021	17.2162	17.2065	16.8304
A0A287A734;A0A287AWU7;A0A287BLF6;A0A5G2R3E3;A0A5G2R4M0;A0A5G2RBT6;I3LK97	NA	A0A287A734_PIG;A0A287AWU7_PIG;A0A287BLF6_PIG;A0A5G2R3E3_PIG;A0A5G2R4M0_PIG;A0A5G2RBT6_PIG;I3LK97_PIG	Uncharacterized protein	1.66342e-05	0.00039	0.773274	13.0103	13.7343	13.7025	13.2119	13.247	13.3978	13.935	13.3611	13.6744	13.5176	14.0202	13.4181	13.2828	13.213	13.5395	13.2869	13.2057	13.6504	13.1258	12.9965	12.5151	12.4008	13.5457	12.7028
A0A287BH90;F1SMJ6	C9	A0A287BH90_PIG;F1SMJ6_PIG	MACPF domain-containing protein	1.82131e-05	0.0004	-0.502812	17.4383	18.1881	18.6432	18.0143	18.5414	17.7797	18.4023	17.4931	17.5784	18.2428	17.8497	17.5659	18.0587	18.1247	18.5052	18.5571	17.8434	18.4539	18.5456	18.4802	18.4386	18.4539	18.123	18.1078
F1RRW5	ACE	F1RRW5_PIG	Angiotensin-converting enzyme	1.90597e-05	0.00041	0.40064	18.264	18.2159	18.528	18.6841	18.2357	18.6148	18.5071	18.4082	18.7171	18.705	18.0743	18.3544	18.2385	18.3363	18.4478	18.0825	18.4904	18.1976	17.8915	17.9821	17.9473	18.1895	18.3891	17.9628
A0A287B1L8	NOTCH1	A0A287B1L8_PIG	Neurogenic locus notch homolog protein 1 preproprotein	2.17601e-05	0.00045	0.380914	16.4458	16.7881	16.5949	16.5472	16.6062	16.4003	16.8109	16.9094	16.8023	16.7396	16.6386	16.484	16.6202	16.5523	16.7874	16.4491	16.5015	16.4943	16.3796	16.4983	16.3824	16.5621	16.1929	16.0838
K7GP14;P31936	IBSP	K7GP14_PIG;SIAL_PIG	Bone sialoprotein 2	3.03793e-05	0.00062	1.52821	14.1994	13.8989	13.5664	13.9574	13.3385	13.4115	15.0621	15.8574	16.248	14.7197	16.4897	14.2016	13.7778	13.9859	12.9055	12.3871	12.8464	13.8453	13.6178	13.8677	14.5366	13.5648	14.1554	13.667
Q9GLP1	F5	FA5_PIG	Coagulation factor V	3.74495e-05	0.00075	-0.54351	17.668	17.8084	17.9916	17.5296	17.6478	17.4644	17.5125	17.1319	16.673	17.3671	16.9584	17.5856	17.8665	18.0577	18.234	18.3566	17.9158	17.7649	17.9874	17.9245	17.6181	17.493	17.7503	17.7164
A0A5G2QHN7;A0A5G2RDZ7;A0A5G2REB0;A0A5K1UD05;A0A5S8KXS2;Q29221	CAPZA2;CAPZA2;CAPZA2;CAPZA1;CAPZA2;CAPZA2	A0A5G2QHN7_PIG;A0A5G2RDZ7_PIG;A0A5G2REB0_PIG;A0A5K1UD05_PIG;A0A5S8KXS2_PIG;CAZA2_PIG	F-actin-capping protein subunit alpha;F-actin-capping protein subunit alpha;F-actin-capping protein subunit alpha;F-actin-capping protein subunit alpha;F-actin-capping protein subunit alpha;F-actin-capping protein subunit alpha-2	4.54613e-05	0.00089	2.90274	11.6156	10.6433	15.7027	12.1892	12.0461	12.4164	15.935	15.996	15.1253	13.2164	15.4086	16.203	14.7802	12.2212	11.6091	14.2759	16.0013	13.2231	11.9717	12.2447	12.6263	12.9143	12.3182	12.3926
A0A5G2RIC7;K7GQL2	F13A1	A0A5G2RIC7_PIG;K7GQL2_PIG	Coagulation factor XIII A chain	4.93532e-05	0.00094	0.244052	16.8607	16.7237	16.1419	16.705	16.2173	16.6611	16.4918	16.4586	16.3596	15.809	16.4007	16.7875	16.6418	16.9374	16.0917	16.5743	16.5516	16.1399	16.499	15.9126	16.2016	15.841	16.0936	16.295
A0A5G2QNX5	DSC2	A0A5G2QNX5_PIG	Desmocollin 2	5.71904e-05	0.00107	0.523246	16.4675	15.7412	15.6139	15.7147	15.3567	15.5423	16.212	15.873	15.5876	16.2125	15.981	16.3194	15.6378	16.2347	15.7655	15.6496	15.7631	15.4635	15.2965	15.4924	15.9126	15.9151	15.1513	15.2781
I3LVL5	CRISP3	I3LVL5_PIG	Cysteine rich secretory protein 3	0.000157361	0.00287	0.520163	16.8723	17.2615	16.9371	17.2611	16.9785	16.7444	18.1934	17.5982	17.931	17.6107	17.9476	18.1466	16.9767	17.0131	16.9583	16.6631	17.0574	17.0738	17.1401	17.2978	17.5602	17.7663	17.4687	17.0735
A0A5G2QYD9;A0A5G2RAT8;P00172	CYB5A	A0A5G2QYD9_PIG;A0A5G2RAT8_PIG;CYB5_PIG	Cytochrome b5	0.000194037	0.00346	-2.48384	14.799	14.0172	14.453	15.8447	15.6437	15.5813	13.7068	14.6142	14.7605	14.3562	13.709	17.5705	14.0388	14.1269	14.4744	15.5669	14.7273	14.5057	18.6962	15.7583	16.897	18.6926	15.666	17.9101
A0A5G2R1Q1;F1SB67	IGF2R	A0A5G2R1Q1_PIG;F1SB67_PIG	Fibronectin type-II domain-containing protein;Insulin-like growth factor II receptor	0.000214825	0.00376	0.243635	17.8248	17.7258	17.7325	17.7288	17.59	17.8137	17.6664	17.6528	17.8619	17.5172	17.5326	17.7358	17.6285	17.9853	17.6698	17.6841	17.8623	17.4715	17.6627	17.5049	17.3655	17.1745	17.4944	17.3028
F1S0J2	C4BPA	F1S0J2_PIG	Uncharacterized protein	0.000225205	0.00386	-0.424697	17.5549	18.2169	17.8931	17.9978	17.9639	18.1573	17.7893	17.8958	18.0331	17.7414	17.3426	17.7242	17.5847	18.2422	17.7225	17.8349	17.8207	17.9519	18.0768	18.2418	18.1629	18.0923	18.2531	18.2477
F1REZ2;I3LFP3;K7GLS1	VCAN	F1REZ2_PIG;I3LFP3_PIG;K7GLS1_PIG	Versican	0.000238086	0.004	1.28414	12.5307	12.8734	12.997	12.7267	12.9485	13.165	13.5985	14.0655	15.4779	13.45	16.0244	13.2053	13.2425	13.628	12.721	12.6978	13.021	13.4329	12.7243	13.3828	13.4361	12.5963	13.1975	12.7798
F1S268	CREG1	F1S268_PIG	Cellular repressor of E1A stimulated genes 1	0.000269365	0.00444	-0.583133	14.4955	13.9305	14.4198	14.172	14.0006	14.2216	13.6944	13.9211	13.9948	13.9094	13.7016	14.3319	14.7558	15.1893	14.866	15.3038	15.2979	14.86	14.4616	14.3512	14.6726	14.6371	14.6524	14.2771
F1RU34	CST6	F1RU34_PIG	Cystatin E/M	0.000347301	0.00562	0.698324	16.9997	15.8137	16.455	15.7632	15.9925	16.0452	16.7254	16.7367	16.1198	16.7275	16.624	16.6621	15.7697	16.3329	16.0159	15.7996	16.1157	16.0959	15.6572	15.3373	16.3463	16.3332	15.8754	15.8562
A0A287A3Z4;F1SC80;P27485	RBP4	A0A287A3Z4_PIG;F1SC80_PIG;RET4_PIG	Retinol-binding protein 4;Retinol-binding protein;Retinol-binding protein 4	0.00041562	0.0066	-0.348103	19.3014	18.9941	19.811	18.6017	19.749	17.9014	19.4732	19.4377	18.4652	19.1046	19.2684	18.9755	18.8465	19.5874	19.8615	19.5088	19.3706	19.8559	19.6277	19.9528	19.5322	19.7027	19.3232	18.6746
A0A5G2R5W3;K7GKY0	CD109	A0A5G2R5W3_PIG;K7GKY0_PIG	CD109 molecule;CD109 antigen isoform 1 preproprotein	0.000446433	0.00696	0.361164	19.2573	19.7604	19.4353	19.2688	19.367	19.326	19.4454	19.4723	19.4576	19.5597	19.2746	19.3983	19.3348	19.4581	19.3355	19.2487	19.4131	19.438	19.362	19.093	19.1641	19.2059	18.6911	18.9248
F1RWV2;P35624	TIMP1	F1RWV2_PIG;TIMP1_PIG	Metalloproteinase inhibitor 1	0.000489097	0.00748	0.747751	16.1842	15.6968	16.1187	16.1719	15.907	16.4331	17.1738	17.1429	18.1757	17.1656	17.9393	16.223	15.028	15.4073	15.9274	15.63	15.5942	15.8687	16.6596	16.7362	16.3239	17.0277	16.3172	16.2692
A0A287B863;F1SKR0	ACAN	A0A287B863_PIG;F1SKR0_PIG	Aggrecan core protein	0.000547823	0.00824	0.769121	16.5264	17.1974	16.7807	17.1937	16.8929	16.8571	16.7731	17.2518	18.5165	16.4937	18.0399	16.8174	17.1687	16.4396	16.9764	16.6208	16.9447	16.4979	16.7166	16.4038	16.5581	16.5386	16.6085	16.4521
A0A5G2QBJ9	APOF	A0A5G2QBJ9_PIG	Apolipoprotein F	0.000584446	0.00864	-0.641567	17.6603	17.6005	17.5083	16.511	17.7919	16.6027	17.1767	17.2335	17.5245	16.5315	17.4778	17.4705	17.239	17.6895	17.8628	17.9127	17.4778	17.5165	18.0178	17.9066	17.7241	17.9514	18.1123	17.5517
F1RPW2	F5	F1RPW2_PIG	Coagulation factor V	0.000667327	0.00969	-0.685959	16.8739	16.7564	17.2624	16.4068	16.6783	15.3327	16.6558	16.3763	15.5007	15.5625	16.1683	16.6751	17.0583	17.3786	17.3943	17.3803	17.0655	16.9224	17.1122	16.8391	16.8527	16.585	16.8525	16.813
F1RN40	F7	F1RN40_PIG	Uncharacterized protein	0.000736427	0.01043	-1.30302	13.4658	12.3523	14.2567	14.3262	13.1076	14.4333	13.1401	13.7531	12.9623	14.0252	12.5651	13.8376	14.4049	14.822	14.2644	15.4196	15.1874	14.9342	14.2489	14.1932	14.5291	15.385	15.0184	14.7271
A0A286ZQI5;A0A286ZZM6;A0A287AQ76;A0A287ASJ8	CHL1	A0A286ZQI5_PIG;A0A286ZZM6_PIG;A0A287AQ76_PIG;A0A287ASJ8_PIG	Cell adhesion molecule L1 like	0.000742116	0.01043	0.318209	16.4998	16.5407	16.4627	16.7873	16.2625	16.3746	16.3194	16.3206	16.4641	16.443	16.2241	16.4672	15.9185	16.2756	16.1174	16.2988	16.465	16.1518	15.6449	16.073	16.2218	16.2467	16.2081	15.9345
E9KYT3;P24854	IGFBP4	E9KYT3_PIG;IBP4_PIG	Insulin-like growth factor-binding protein 4	0.000811512	0.01122	-0.386085	15.5897	15.1007	14.9281	14.4946	15.0183	14.6565	15.3706	15.3915	15.2296	15.0049	15.4644	15.3862	15.2544	15.216	14.7996	14.8896	15.1837	14.996	15.852	15.658	15.6596	16.1076	15.44	15.4465
A0A287BL66;F1SGH0	PTPRG	A0A287BL66_PIG;F1SGH0_PIG	Protein tyrosine phosphatase receptor type G	0.000835987	0.01129	0.139709	16.2382	16.4538	16.2801	16.6517	16.2457	16.6258	16.0916	16.2538	16.5352	16.4668	16.1634	16.4594	16.2344	16.3034	16.3066	16.2436	16.3668	16.019	15.9761	16.2159	16.1224	16.4417	16.3105	16.0654
P51525	NA	PF12_PIG	Prophenin-2	0.000843149	0.01129	0.964068	13.1736	12.981	12.4626	12.484	11.7812	12.4023	14.9592	14.7739	15.2795	14.7125	15.8448	14.4793	11.785	13.3912	11.8115	13.4633	11.2585	10.9168	13.443	13.9497	14.5061	14.6957	13.865	13.8052
A0A286ZIC1	GSN	A0A286ZIC1_PIG	Gelsolin	0.00103335	0.01362	-0.60552	17.6976	17.5889	17.8419	17.6713	17.5821	17.8517	17.4912	17.2783	17.5758	17.5047	16.643	17.5745	17.6931	17.2828	18.3834	17.6027	17.9235	18.0959	17.7052	17.7884	17.9597	18.0082	18.2216	18.0175
F1RWA3;G9K122;K7GPB4	MRC1	F1RWA3_PIG;G9K122_PIG;K7GPB4_PIG	Uncharacterized protein;Macrophage mannose receptor 1;Uncharacterized protein	0.00119049	0.01523	0.317322	15.6498	15.5634	15.0372	15.1393	15.0634	15.4302	16.007	16.1456	16.65	15.9407	16.3415	16.0009	15.2701	15.0863	14.8912	15.1766	15.6071	15.1051	15.3992	15.9705	15.9334	15.8522	16.0152	16.0112
A0A287A4X6;A0A5G2QL34;A0A5G2QTJ9;I3LU56	ICOSLG	A0A287A4X6_PIG;A0A5G2QL34_PIG;A0A5G2QTJ9_PIG;I3LU56_PIG	Ig-like domain-containing protein	0.00117348	0.01523	0.478151	17.2812	17.2619	17.048	17.0798	16.9618	17.0213	17.4914	17.4278	17.2914	17.4866	17.5139	17.549	16.5029	16.9978	17.3081	16.5819	16.9836	17.3565	16.8238	16.9158	17.1184	17.2245	16.892	16.9167
A0A287AKU7;A0A287AVF2;A0A287BQB6;F1SMI5;I3LDR6;I3LUI4	TNC	A0A287AKU7_PIG;A0A287AVF2_PIG;A0A287BQB6_PIG;F1SMI5_PIG;I3LDR6_PIG;I3LUI4_PIG	Tenascin	0.00122825	0.01548	0.835784	16.6291	16.0829	15.5147	15.8268	15.1077	15.9409	16.3666	16.43	16.7336	16.7292	17.8408	16.3052	15.6465	15.6766	15.5049	15.3605	15.8621	16.0559	15.7485	16.1351	15.5935	16.4735	15.5185	15.9216
A0A287AS68;A0A5G2QR79;Q29042	FCN1	A0A287AS68_PIG;A0A5G2QR79_PIG;FCN1_PIG	Ficolin-1	0.00125805	0.01563	1.98636	13.9922	13.3268	14.8247	14.143	14.0597	14.1448	18.4202	14.6073	14.4819	16.8782	16.825	15.0022	13.1459	14.1489	13.2111	13.2262	16.291	12.8827	13.6343	14.2883	14.3266	14.6016	14.0492	13.3967
A0A287BRL8	MARCKS	A0A287BRL8_PIG	Myristoylated alanine rich protein kinase C substrate	0.00128711	0.01576	0.725996	13.4184	13.4929	12.9786	13.3685	13.1542	13.6471	13.9659	14.5503	14.3225	13.5765	14.6433	13.6474	12.9769	12.9169	13.1889	13.2146	13.1894	13.6255	13.358	14.0275	13.5984	13.2624	12.6581	13.4456
F1S7Z7	ANGPTL3	F1S7Z7_PIG	Fibrinogen C-terminal domain-containing protein	0.00132676	0.01601	-0.65897	15.5469	15.1901	14.6012	15.5173	14.7621	15.1827	14.4132	14.5401	14.1775	13.0631	14.3453	14.3313	14.9409	14.9847	15.3193	15.2002	15.1681	15.4198	14.6098	14.837	14.6521	14.83	14.6862	15.2094
O02668	ITIH2	ITIH2_PIG	Inter-alpha-trypsin inhibitor heavy chain H2	0.00147852	0.0176	-0.562186	22.1589	22.0368	22.3426	22.1533	22.1669	21.4062	21.6419	21.9565	20.9733	21.5748	20.9218	21.8845	21.9255	22.3725	22.64	21.9362	22.4648	22.0353	22.2527	22.2391	22.1309	21.7325	22.4026	21.5681
P04366	AMBP	AMBP_PIG	Protein AMBP (Fragment)	0.0016126	0.01893	-0.38495	23.1483	22.7668	23.2625	22.9996	23.1227	23.0055	22.5002	22.7382	22.2106	22.7933	22.2641	22.7396	22.9673	23.4309	23.4603	22.9388	23.3876	23.214	23.1973	22.8967	23.0255	22.8076	23.1361	22.4924
A0A286ZJ21;A0A287ADL0;I3LEW0	COLEC11	A0A286ZJ21_PIG;A0A287ADL0_PIG;I3LEW0_PIG	Collectin subfamily member 11	0.0017173	0.01989	0.18964	17.2025	16.9531	16.9932	16.8296	16.9196	17.1232	16.7237	16.7212	16.6636	16.632	16.425	16.7702	16.8247	17.1647	16.6652	16.5948	16.9055	16.5136	16.3926	16.5339	16.605	16.4567	16.5268	16.2827
A0A287AE47;A0A287B310	STOM	A0A287AE47_PIG;A0A287B310_PIG	Stomatin	0.00186616	0.02132	0.689167	13.0437	13.9711	13.5274	13.528	13.0656	13.9039	13.8637	14.7889	15.4496	14.5084	15.1688	14.2971	15.633	12.9391	13.5524	16.0419	14.5687	13.5702	14.143	14.2635	12.6334	14.4552	14.1356	14.3108
A0A286ZZL6;A0A287ALG9;A0A5G2Q9S9;A0A5G2QPH4;A0A5G2R267;F1SGT2;K7GLU2	APIP	A0A286ZZL6_PIG;A0A287ALG9_PIG;A0A5G2Q9S9_PIG;A0A5G2QPH4_PIG;A0A5G2R267_PIG;F1SGT2_PIG;K7GLU2_PIG	Methylthioribulose-1-phosphate dehydratase	0.00200443	0.0226	1.26168	13.8177	13.4826	13.5983	13.1138	13.2562	13.6432	13.0691	14.4485	13.2033	13.9816	13.54	13.498	13.9324	13.6064	13.8227	14.4076	13.0163	13.6521	13.1316	13.2902	10.6284	11.7031	12.8576	12.5597
A0A287A078;F1S663	LAMC1	A0A287A078_PIG;F1S663_PIG	Uncharacterized protein	0.00216508	0.0241	0.519152	14.693	14.5928	14.1228	14.2412	14.0065	14.5584	14.0668	14.5114	14.7747	14.3582	14.8148	14.4208	13.7169	13.9319	14.0946	13.9698	14.3402	14.5736	13.8222	14.1511	14.2423	13.9744	13.6653	13.9766
A0A480P2B4	SERPINA5	A0A480P2B4_PIG	Plasma serine protease inhibitor preproprotein	0.00228839	0.02514	-0.439572	19.3621	19.2464	19.719	19.3035	19.7049	19.2363	19.3268	19.0236	18.7795	19.4847	18.984	19.5679	19.8008	19.7261	20.0409	20.0836	20.1799	20.0493	19.9113	19.7283	19.4471	19.92	19.5255	19.2717
A0A5G2R2W7	NA	A0A5G2R2W7_PIG	Uncharacterized protein	0.00245369	0.02662	0.25355	14.8188	15.1335	15.3495	15.3361	15.1139	15.2192	15.2816	15.0431	15.6218	15.2325	15.0408	15.0162	15.2187	15.2025	15.3923	15.1662	15.2349	15.0613	15.1047	14.9937	14.9637	14.7373	14.9407	14.9747
A0A5G2QG32;A0A5G2QIU0;F1RL77;I3LJV6	CSF1R	A0A5G2QG32_PIG;A0A5G2QIU0_PIG;F1RL77_PIG;I3LJV6_PIG	Colony stimulating factor 1 receptor	0.00271009	0.02903	0.347157	17.8966	18.1809	17.923	18.2166	17.9315	17.9715	18.4421	17.8628	18.2759	18.2444	18.1647	18.0847	17.9711	17.7455	17.9536	17.8838	17.9015	18.1229	17.9748	17.5473	18.0514	18.0361	17.8888	17.4934
A0A287AT36;A0A5G2QNM7;F1S790	C8B	A0A287AT36_PIG;A0A5G2QNM7_PIG;F1S790_PIG	MACPF domain-containing protein	0.00312655	0.03268	-0.328962	16.5062	16.4722	17.3282	16.4258	17.122	16.4665	16.846	16.5794	16.2061	17.1065	16.6286	16.7944	16.5608	17.0886	17.3636	16.9976	16.9533	17.0694	17.1232	17.2897	17.474	16.6561	17.0813	16.5105
A0A287BN06	PZP	A0A287BN06_PIG	Uncharacterized protein	0.00309383	0.03268	-0.580888	20.9769	22.0821	21.421	21.4373	21.4736	21.9701	21.2817	21.4206	21.4654	21.0243	21.1916	21.132	21.8095	21.3945	21.379	22.0661	21.4067	21.4561	21.8879	22.0779	21.4795	21.485	22.1012	21.9694
P04404	CHGA	CMGA_PIG	Chromogranin-A (Fragment)	0.00327579	0.03382	0.82115	15.6488	15.6835	15.8098	15.375	15.7945	15.1036	17.3752	18.3451	17.288	17.271	17.3659	16.9955	15.3038	15.6543	15.7531	15.5925	16.026	16.0347	15.987	16.7349	16.2713	17.5237	17.0885	16.1085
A0A5G2QP78;K7GMF9	ANPEP	A0A5G2QP78_PIG;K7GMF9_PIG	Aminopeptidase	0.00354677	0.03619	0.529738	16.0108	16.693	16.384	16.0137	16.308	16.1553	16.5798	16.5124	16.5014	16.209	16.5598	16.205	16.2007	15.8295	16.2094	16.0696	15.96	16.3111	16.2807	16.1331	15.7234	15.7995	15.9458	15.5065
A0A287BSC3;A0A480UBK2	ALPL	A0A287BSC3_PIG;A0A480UBK2_PIG	Alkaline phosphatase	0.00367432	0.03705	0.538559	15.0176	15.6694	15.2481	15.6976	15.4953	15.1434	16.0793	15.5539	15.7587	15.2733	15.4557	16.1418	15.4831	15.5744	15.015	15.022	15.3915	15.2902	15.3607	15.1704	14.6246	15.8074	14.8211	15.2472
A0A287B3S3	ITIH1	A0A287B3S3_PIG	Inter-alpha-trypsin inhibitor heavy chain H1	0.00381093	0.03798	-0.506612	21.3307	21.385	21.5173	21.8741	21.6398	20.8713	21.0055	21.0939	20.2369	20.9819	20.5549	21.196	21.2752	21.6744	21.8865	21.4432	21.7741	21.507	21.722	21.4407	21.5089	21.0024	21.6656	20.769
A0A286ZYQ4	LCP1	A0A286ZYQ4_PIG	Lymphocyte cytosolic protein 1	0.00392471	0.03866	0.639638	14.48	15.3734	14.6827	15.1144	14.889	15.4457	15.9984	17.3186	16.6346	15.8857	16.3836	15.7809	15.0423	14.4144	15.3446	15.1757	15.1681	14.9843	15.376	16.0391	15.5155	15.7115	15.9311	15.5908
I3LKV5	ADAMTS13	I3LKV5_PIG	ADAM metallopeptidase with thrombospondin type 1 motif 13	0.00401643	0.03868	0.480748	16.9725	16.785	17.1111	16.9402	17.0157	17.0145	16.8426	17.0429	17.0724	16.6179	16.854	16.0092	16.5654	16.8719	16.7512	16.2719	16.8907	16.9181	16.1468	16.0529	16.0611	16.2162	16.3849	16.6926
A0A286ZVC4;A0A287BQK7;F1SLX4	PTPRZ1	A0A286ZVC4_PIG;A0A287BQK7_PIG;F1SLX4_PIG	Protein tyrosine phosphatase receptor type Z1	0.00397727	0.03868	0.394107	14.5022	14.9366	14.5406	14.979	13.9182	14.9333	14.0632	14.3708	15.1634	13.7371	14.2538	14.9573	14.8559	15.0533	14.4373	14.0036	14.3032	14.132	14.1432	13.7786	14.2721	13.9943	13.5755	14.4173
F1S902	COMP	F1S902_PIG	Cartilage oligomeric matrix protein	0.00423812	0.04036	0.489843	18.5622	19.0842	18.4858	19.2243	18.5525	19.2176	19.1866	19.0179	18.6508	18.6736	19.2617	18.7786	18.8449	18.5506	18.5614	18.4602	18.6395	18.9861	18.687	18.3332	18.3906	18.6137	18.2484	18.3573
I3LK29	LCAT	I3LK29_PIG	Phosphatidylcholine-sterol acyltransferase	0.0045247	0.04261	-0.360676	16.4572	16.6256	16.976	16.6983	16.9141	16.7481	16.732	16.6458	16.5075	16.5976	16.2436	16.4844	16.2554	16.6829	16.8377	16.9533	16.8421	16.5259	16.8057	17.0352	16.7737	17.0682	16.8666	16.8257
A0A5G2R5Z3;F1SAG9;K7GKE2;K7GP49	MCAM	A0A5G2R5Z3_PIG;F1SAG9_PIG;K7GKE2_PIG;K7GP49_PIG	Melanoma cell adhesion molecule	0.00504312	0.04694	0.215574	17.2617	17.0743	16.9782	17.1678	16.9066	17.0755	17.1297	16.8866	17.1242	17.0276	16.9647	16.9387	16.8056	16.8512	16.8169	16.6901	16.8943	17.0544	16.771	16.7845	16.6123	16.773	16.947	16.8902
I3LKI1	SRGN	I3LKI1_PIG	Serglycin	0.00509351	0.04694	1.62092	14.874	14.3513	14.8044	12.8801	14.1297	14.6118	15.1122	13.9744	15.0338	15.5076	13.8914	13.9585	14.0748	13.8197	15.5135	13.7002	14.7096	14.7995	12.4879	13.3989	10.4273	13.1124	14.0296	14.2963
P79403	GANAB	GANAB_PIG	Neutral alpha-glucosidase AB	0.00589647	0.05376	1.61282	11.5061	10.6867	10.9888	11.7315	11.1349	10.9389	11.8898	13.2055	13.0567	11.2733	13.4426	11.0937	8.86572	12.3655	10.1321	9.89254	11.1937	10.4151	10.2188	11.2128	11.0148	9.44524	11.4401	10.9531
P80928	MIF	MIF_PIG	Macrophage migration inhibitory factor	0.00603219	0.05442	0.616469	16.9184	17.1246	16.5477	16.9306	17.0258	16.9995	16.8511	18.0106	17.4423	17.2016	17.5837	16.4666	17.4463	17.1449	17.4373	18.2916	17.4022	17.8112	16.6795	16.798	16.4666	16.7227	16.6774	16.5128
A0A5G2QSL2;I3LJ52	CTRB2	A0A5G2QSL2_PIG;I3LJ52_PIG	Peptidase S1 domain-containing protein	0.00659331	0.05886	1.46523	12.3531	11.9939	13.2951	12.3994	13.6739	11.6505	13.0036	13.7414	13.224	13.5805	14.2592	11.8474	10.6762	11.744	10.8012	11.2219	10.8331	11.4257	12.2924	12.1047	11.3603	12.0172	11.9208	11.1692
A0A5G2QWP0	PLXND1	A0A5G2QWP0_PIG	Plexin D1	0.00685796	0.06059	0.620677	14.5835	14.8849	14.9262	15.4708	14.9158	15.4332	14.9731	14.9159	15.1336	15.8957	14.6645	16.1594	15.2173	14.5941	15.169	14.3949	15.3646	14.854	14.6634	14.819	14.0059	14.8584	15.1093	14.5622
A0A5G2Q6R4	HMCN2	A0A5G2Q6R4_PIG	Hemicentin 2	0.00726122	0.06286	0.54429	16.5428	15.8282	16.3855	16.3789	15.901	16.4721	15.473	15.6756	16.2425	15.0692	16.49	15.2809	15.4543	15.853	15.8182	14.952	15.3953	15.0712	14.259	14.9044	15.5538	15.1215	15.7053	15.4215
A0A5G2QR34;F1RIF8	PGD	A0A5G2QR34_PIG;F1RIF8_PIG	6-phosphogluconate dehydrogenase, decarboxylating;6-phosphogluconate dehydrogenase, decarboxylating	0.00724707	0.06286	0.76351	14.8562	14.79	14.4926	14.4472	14.1631	14.7537	14.8771	16.495	15.6572	15.2387	15.8142	14.1372	14.6706	13.9031	14.6665	15.2864	14.404	14.8112	14.5833	14.812	14.477	14.7453	14.4992	14.5215
A0A5G2Q6W7;F1S3J9	ICAM1	A0A5G2Q6W7_PIG;F1S3J9_PIG	Uncharacterized protein;Intercellular adhesion molecule 1	0.0073419	0.06292	0.429787	14.3454	14.6018	14.5547	14.0303	14.5463	14.1577	15.4648	15.3232	15.2548	15.3497	14.9957	14.8605	14.0695	14.0214	14.5546	14.5081	14.4089	14.1188	15.0027	14.9231	14.5864	15.0746	14.641	14.4422
F1S567	VCAM1	F1S567_PIG	Uncharacterized protein	0.00747557	0.06343	0.339552	16.9208	16.969	16.9588	16.5987	16.5535	16.7031	17.4327	17.3752	17.3289	17.6458	17.6792	17.4651	16.7101	16.6081	16.7994	16.3168	17.3742	16.7086	16.9018	17.1094	17.3044	17.2348	17.1899	17.1493
A0A287AG13	APOB	A0A287AG13_PIG	Apolipoprotein B	0.0075695	0.0636	-0.450397	20.8603	20.7758	20.9648	21.0827	21.178	21.3653	20.6748	20.6505	20.4074	21.0572	20.3224	20.9979	21.076	20.9253	21.2709	21.6542	21.434	21.0724	21.1595	21.0426	20.9356	21.4183	21.25	21.0066
F1S1A7	ADAMTS4	F1S1A7_PIG	ADAM metallopeptidase with thrombospondin type 1 motif 4	0.00769353	0.06401	0.815284	14.1477	14.3745	13.7714	13.6333	12.7602	14.7192	14.302	13.7572	14.9077	14.3255	14.9423	14.8979	13.2632	14.1291	14.1027	13.3879	13.7989	14.2455	13.5239	14.0577	13.9745	13.7333	13.2133	13.7382
A0A287B116;A0A5G2R1Q9	TNFRSF21	A0A287B116_PIG;A0A5G2R1Q9_PIG	TNF receptor superfamily member 21	0.00782886	0.06451	0.724016	16.4808	14.5687	14.3779	15.4582	15.0378	15.429	14.6096	15.4414	15.4545	14.5965	16.1305	16.739	14.7317	14.8958	14.8885	14.9891	15.3997	14.7691	14.247	14.3542	16.164	14.7687	14.8265	14.267
A0A5G2R401	TG	A0A5G2R401_PIG	Thyroglobulin	0.00817418	0.06672	0.578426	16.6774	16.2198	16.4446	17.1484	16.1495	16.5093	16.732	16.2235	17.1188	16.8709	16.358	16.9703	16.3198	16.8282	15.9532	17.0262	16.5727	16.9003	16.3768	16.3066	15.7708	16.6573	16.1402	15.5512
A0A287B490	OAF	A0A287B490_PIG	Uncharacterized protein	0.00894837	0.07235	0.627817	16.3545	15.8836	16.0802	15.8252	15.9296	15.5421	16.2922	15.4818	15.7399	16.1292	16.331	16.0584	15.2383	15.5842	15.7975	15.2104	15.7144	15.3366	15.5912	15.6614	15.8523	15.4841	14.7648	14.9117
F1SQR8	LTA4H	F1SQR8_PIG	Leukotriene A(4) hydrolase	0.00927412	0.07428	0.689912	15.9967	15.212	14.99	15.1067	15.5997	14.9858	15.459	16.2056	15.3808	15.1693	15.4347	14.9607	14.851	14.1817	15.5063	15.0859	15.313	14.7484	14.9336	14.8112	14.7736	14.9668	14.3355	14.65
P20112	SPARC	SPRC_PIG	SPARC	0.0100157	0.07664	0.548653	15.3685	15.4725	15.1499	16.042	15.4591	15.4169	14.9591	15.3552	15.4799	15.0806	15.5134	14.707	14.364	14.7829	14.9948	14.2762	15.1613	14.9781	14.8612	14.9467	14.8352	13.999	14.5051	14.6562
A0A5G2RJ79	APOC2	A0A5G2RJ79_PIG	Uncharacterized protein	0.00998026	0.07664	-0.387374	14.4954	14.7104	14.8991	14.065	15.4529	13.8189	15.1244	15.1116	13.3947	15.3392	14.8537	13.1147	15.3697	15.8524	15.4022	15.6389	15.4411	15.8531	15.8078	15.3493	13.7043	15.2965	14.4768	14.6278
A0A5G2QF97;A0A5G2QVW3;A0A5S6GJ84;O02837	CSF3	A0A5G2QF97_PIG;A0A5G2QVW3_PIG;A0A5S6GJ84_PIG;CSF3_PIG	Granulocyte colony-stimulating factor	0.00981221	0.07664	1.34525	11.0529	11.6161	12.8019	9.94959	10.3941	11.3897	12.9137	12.7478	15.7593	12.4271	14.6318	11.7082	13.1472	11.5683	10.5777	11.6134	12.2121	10.8691	10.5491	13.0161	11.4441	13.3813	12.0153	11.7106
F1SNF3	PODXL	F1SNF3_PIG	Podocalyxin	0.00988492	0.07664	0.22559	15.6243	15.9461	15.7592	15.8647	15.6053	15.9508	15.8475	16.0269	16.8016	16.1641	15.886	16.6982	15.8462	15.9767	15.6442	15.7494	16.7199	15.1641	16.2099	16.2015	15.5963	15.5917	16.2369	16.2344
A0A286ZNE4	SUSD5	A0A286ZNE4_PIG	Sushi domain containing 5	0.00999347	0.07664	0.436347	13.1788	14.1358	13.7693	14.3861	13.8519	13.9342	14.0655	13.972	13.8527	13.6918	14.4217	13.8386	13.5335	13.6205	13.99	13.7793	14.1442	13.8361	13.4612	13.4992	13.3378	13.9792	13.6963	13.2506
I3LQ84	COL6A2	I3LQ84_PIG	Collagen type VI alpha 2 chain	0.0101385	0.07689	0.379904	16.038	16.2392	16.0744	16.2735	16.1462	16.2678	15.951	16.0447	16.0081	15.8016	16.6094	15.368	16.0165	15.9457	16.1836	15.827	16.1648	16.4042	15.6759	15.6913	15.3836	15.7243	15.452	15.5763
A0A286ZPI8;A0A287B6Q2	CD55	A0A286ZPI8_PIG;A0A287B6Q2_PIG	Uncharacterized protein	0.0103541	0.07784	0.257819	17.1886	17.5901	17.1531	17.1646	16.9538	17.782	17.6611	17.1676	17.6751	17.5175	17.4601	17.9156	17.6588	17.7883	17.1557	17.3082	17.6853	17.1291	17.4811	16.794	17.2157	17.3178	17.6205	17.4209
A0A287AD45;Q45FY6	HPRT1	A0A287AD45_PIG;HPRT_PIG	Hypoxanthine phosphoribosyltransferase;Hypoxanthine-guanine phosphoribosyltransferase	0.0107124	0.07896	0.870506	13.0595	13.3718	12.739	13.0969	13.0533	13.196	13.5486	15.0876	13.863	13.5641	14.0177	12.7581	13.8607	12.8555	13.5942	14.3172	13.1941	13.7651	13.1455	13.5236	12.3477	13.1212	12.4268	13.0513
A0A287AKJ2	NID2	A0A287AKJ2_PIG	Nidogen 2	0.0107805	0.07896	0.548866	15.1329	15.1406	14.623	14.1214	14.5842	15.2231	14.8158	14.9816	14.9692	14.7358	15.4237	14.7377	14.3649	14.7017	15.0644	14.3195	15.1601	14.7358	14.2888	14.6839	14.1997	14.614	14.1371	14.4471
A0A287A1I6	PCDH18	A0A287A1I6_PIG	Protocadherin 18	0.0106218	0.07896	0.353342	14.9124	14.8228	14.9323	15.259	14.4314	15.5052	14.8669	14.9812	15.3074	14.8048	14.9408	15.2232	14.5571	15.0947	14.9072	14.35	15.2657	14.4466	14.4927	14.5949	14.6259	14.3882	14.9984	14.9041
A0A286ZN92;A0A287AGI2;A0A287B8T0;A0A287BJL7;A0A5S6H3C2;A0A5S6I4J7;P23695	IGF2	A0A286ZN92_PIG;A0A287AGI2_PIG;A0A287B8T0_PIG;A0A287BJL7_PIG;A0A5S6H3C2_PIG;A0A5S6I4J7_PIG;IGF2_PIG	Insulin-like growth factor II	0.0109236	0.07933	-0.584166	17.8677	16.5972	16.9991	17.3398	16.7309	17.4111	16.8767	17.037	16.5418	16.9655	17.0931	17.2735	18.0587	18.1446	18.0761	18.3828	18.4845	17.9151	17.3088	17.101	17.8049	17.9449	17.3699	17.7631
Q2LE37	APOM	APOM_PIG	Apolipoprotein M	0.0110341	0.07946	-0.23244	21.7397	21.8821	21.8937	21.4358	21.6457	21.5033	21.4938	21.4521	21.4863	21.5741	21.4557	21.6881	21.7757	21.8726	21.9725	22.1551	22.2256	21.8747	21.8421	21.8254	21.737	21.7789	21.7722	21.5892
F1SFD1	TIE1	F1SFD1_PIG	Tyrosine kinase with immunoglobulin like and EGF like domains 1	0.011235	0.08024	0.395711	15.3419	16.0711	15.6039	15.9839	15.664	16.4113	16.2631	16.161	16.5356	16.0596	16.2337	15.8419	15.5955	15.1636	15.877	15.3989	15.4662	15.7693	15.5733	15.7799	15.5286	16.125	16.0012	15.7128
A0A286ZYL3;A0A287A2L7;A0A5G2QEI5;A0A5G2QHH4;A0A5G2QIF2;A0A5G2QUX0;A0A5G2QWN3;A0A5G2RB21;F1SL03	ABI3BP	A0A286ZYL3_PIG;A0A287A2L7_PIG;A0A5G2QEI5_PIG;A0A5G2QHH4_PIG;A0A5G2QIF2_PIG;A0A5G2QUX0_PIG;A0A5G2QWN3_PIG;A0A5G2RB21_PIG;F1SL03_PIG	ABI family member 3 binding protein	0.0114794	0.0813	0.136524	16.2492	16.2935	15.8916	16.4289	15.7874	16.3045	16.089	16.0202	16.7282	16.3025	16.206	16.6242	16.1676	16.4867	16.2805	16.1839	16.3043	16.1375	15.9583	15.8835	16.3728	16.5743	16.4328	15.929
A0A287BP22;A0A5G2QC98	FSTL1	A0A287BP22_PIG;A0A5G2QC98_PIG	Follistatin like 1	0.0123	0.0857	0.514251	16.5281	16.8462	16.4881	16.3521	16.542	16.2927	16.9255	17.1399	16.8674	16.9493	17.3311	16.5641	16.8691	16.5101	16.7947	16.5259	16.5603	16.9913	16.6066	16.8635	16.845	16.5398	15.8114	16.0254
A0A287A732;F1SLT8	CCDC80	A0A287A732_PIG;F1SLT8_PIG	Coiled-coil domain containing 80	0.0122579	0.0857	0.628558	16.6002	15.3459	15.6318	15.679	16.001	16.5496	16.4044	16.5365	16.1879	15.5497	16.9718	15.6482	15.8741	15.5802	15.5965	15.8225	15.769	15.6014	15.3444	15.8895	15.2418	15.8053	15.5665	15.6796
F1RFU7	CDH11	F1RFU7_PIG	Cadherin 11	0.0130817	0.08948	0.468407	17.5617	16.7848	16.8767	16.9161	16.3871	16.5527	17.1013	16.5269	16.8971	16.5691	16.9133	17.2323	16.6107	16.8051	16.3306	16.4783	15.9852	16.6559	15.326	16.5048	17.2352	16.7395	16.2219	16.4021
A0A287AZ81;A0A5G2R840;F1S5J5	HABP2	A0A287AZ81_PIG;A0A5G2R840_PIG;F1S5J5_PIG	Hyaluronan binding protein 2	0.013008	0.08948	-0.863221	17.5355	16.6422	17.8637	17.0266	17.5722	17.3185	17.4111	15.3565	16.6178	17.0931	16.4258	17.1823	17.096	18.2342	18.3423	17.6623	17.6655	17.2265	17.3926	17.5426	17.2741	17.7272	17.7215	17.6079
A0A5G2QDJ9;F1RPU6	MPZL1	A0A5G2QDJ9_PIG;F1RPU6_PIG	Myelin protein zero like 1	0.0131563	0.08948	0.375984	16.0554	15.5759	15.0531	15.771	15.1297	15.52	15.7062	15.4794	15.109	15.5682	15.8854	15.9225	15.7087	15.7733	15.3863	15.3893	15.483	15.1407	15.1174	15.352	15.2407	15.3152	14.9061	15.4834
A0A5G2QNB8;K7GKU8	MASP2	A0A5G2QNB8_PIG;K7GKU8_PIG	Uncharacterized protein	0.0136402	0.09204	-1.10495	15.4408	13.5978	14.1815	15.7889	14.3243	15.6588	14.4332	15.2279	14.2683	15.4255	15.4022	13.9839	15.8512	14.5324	15.6423	14.9259	15.4691	14.4929	15.9002	15.6825	16.0103	15.9024	15.8991	15.9761
A0A287A2E8;A0A5G2QN46;F1SU88	MERTK	A0A287A2E8_PIG;A0A5G2QN46_PIG;F1SU88_PIG	MER proto-oncogene, tyrosine kinase;MER proto-oncogene, tyrosine kinase;MER proto-oncogene, tyrosine kinase	0.0139118	0.093	0.22358	17.3344	17.5193	17.4494	17.6757	17.317	17.2394	17.6392	17.4519	17.8434	17.6851	17.4463	17.5799	17.4802	17.4373	17.5239	17.2612	17.4143	16.9792	17.261	17.1956	17.3869	17.5263	17.6709	17.2636
I3LB93	NOTCH3	I3LB93_PIG	Notch receptor 3	0.0139993	0.093	0.319504	15.9127	16.1014	14.8278	15.6653	15.2803	15.719	14.868	15.1363	15.5434	15.4574	15.7335	15.7964	15.4271	15.9064	15.1866	14.992	15.2753	15.0456	14.7348	14.5228	15.3281	15.3568	15.1361	15.5392
A0A5G2RHA4;I3L651	FGB	A0A5G2RHA4_PIG;I3L651_PIG	Fibrinogen beta chain	0.0146803	0.09678	-0.178556	23.351	23.4015	23.9219	23.3276	23.9033	23.0875	24.2673	24.1491	23.4209	23.9631	23.5405	23.4199	23.1392	23.8166	23.7477	23.723	23.6542	23.4978	24.1567	24.0104	24.2759	23.9234	23.6846	23.7812

## Sheet: 12h_LOW_SE - LOW_CON
Accession ID	Gene ID	Protein Name	Protein Description	rawP	adjp	log2FC	HIGH_CON	HIGH_CON	HIGH_CON	HIGH_CON	HIGH_CON	HIGH_CON	HIGH_SE	HIGH_SE	HIGH_SE	HIGH_SE	HIGH_SE	HIGH_SE	LOW_CON	LOW_CON	LOW_CON	LOW_CON	LOW_CON	LOW_CON	LOW_SE	LOW_SE	LOW_SE	LOW_SE	LOW_SE	LOW_SE
A0A5G2QKI1;Q8MJ39	MGP	A0A5G2QKI1_PIG;MGP_PIG	Matrix Gla protein	0	0	1.0531	18.4215	18.3704	18.2237	17.9555	17.9824	18.1678	19.8921	19.5982	20.0348	19.5617	19.814	19.3103	18.1826	17.957	17.9383	17.7582	18.1293	17.785	19.0567	19.3257	18.8466	19.0899	18.9597	18.7904
E9KYT3;P24854	IGFBP4	E9KYT3_PIG;IBP4_PIG	Insulin-like growth factor-binding protein 4	8.10928e-08	0	0.637401	15.5897	15.1007	14.9281	14.4946	15.0183	14.6565	15.3706	15.3915	15.2296	15.0049	15.4644	15.3862	15.2544	15.216	14.7996	14.8896	15.1837	14.996	15.852	15.658	15.6596	16.1076	15.44	15.4465
A0A287BPW3;P32196	LOC102159373;NPG3	A0A287BPW3_PIG;PG3_PIG	Uncharacterized protein;Protegrin-3	0	0	3.22835	13.71	14.6204	13.9904	13.7721	13.7085	14.6257	18.0545	17.4219	18.3486	17.8038	18.4729	17.8598	14.3545	13.6258	14.407	15.0699	14.661	13.5294	17.4224	17.5616	17.9198	17.9766	17.3588	16.7784
A0A287BJ65;F1RRX1	LCN2	A0A287BJ65_PIG;F1RRX1_PIG	Lipocln_cytosolic_FA-bd_dom domain-containing protein	1.99132e-11	0	1.06834	15.4122	15.4802	15.537	15.6314	15.4355	15.8423	16.6492	16.1997	16.979	16.7486	17.1635	16.9564	15.0519	15.6809	15.3407	14.926	15.7342	15.4176	15.9525	16.6343	16.874	16.6359	16.2797	16.1848
A0A287BEY3	LOC100624077	A0A287BEY3_PIG	Endogenous retrovirus group V member 2 Env polyprotein	0	0	-1.2769	17.1642	17.2117	16.7008	17.1749	16.8532	17.0825	16.1303	16.3387	15.8689	15.2927	16.1731	16.1884	17.8098	17.3888	17.4363	17.3091	17.6254	17.5367	16.4458	16.4084	16.2754	15.9783	16.352	15.9848
A2SW51	CD14	A2SW51_PIG	Monocyte differentiation antigen CD14	1.10483e-08	0	0.484915	17.0883	17.1894	17.347	17.2313	17.1606	17.1976	17.1586	17.2786	17.4857	17.7357	17.72	17.4679	17.0754	17.3332	17.0789	17.4073	17.3244	17.0092	17.391	17.7243	17.8228	17.6536	17.8899	17.6563
F1RQW7	C2	F1RQW7_PIG	Uncharacterized protein	4.55114e-12	0	1.15039	14.3655	14.1522	13.8078	14.4409	13.7887	14.9901	14.715	14.6105	15.1783	14.4259	15.1223	14.6633	13.846	14.0345	13.3223	13.7538	13.9403	13.4992	14.2288	14.8979	15.6178	14.912	14.8945	14.7473
Q6QR67	RETN	Q6QR67_PIG	Resistin	0	0	2.6746	14.4165	12.6506	13.1463	13.5178	13.2273	12.7652	16.3114	16.0126	16.2769	16.0689	16.6883	15.7051	11.6435	14.1942	12.6108	12.5151	12.9346	13.1577	15.0177	16.0727	15.4861	16.211	15.4544	14.8616
F1RGX4	LOC100737768	F1RGX4_PIG	GLOBIN domain-containing protein	6.97139e-08	0	-1.15848	24.5387	25.3894	24.8745	25.1645	25.1017	25.1839	25.007	25.4418	25.5011	25.2466	24.5755	24.4316	25.8644	25.414	25.6527	26.8764	25.4598	25.8399	24.9756	24.839	24.4139	24.7649	24.4519	24.711
A0A287A690;A0A287AJ76	PRDX2	A0A287A690_PIG;A0A287AJ76_PIG	Peroxiredoxin-2;Peroxiredoxin	1.62408e-08	0	-1.18189	19.0881	19.7638	19.0342	19.6203	19.2826	19.6117	19.2556	20.0164	19.9983	19.5828	19.0726	18.8382	20.0804	20.168	20.1221	21.3181	20.1698	20.2022	19.3139	19.4018	18.5296	19.1218	19.1139	19.4884
A0A5G2QW05;F1SKB1;K7GKN3;K7GMZ8	CP	A0A5G2QW05_PIG;F1SKB1_PIG;K7GKN3_PIG;K7GMZ8_PIG	Ceruloplasmin	3.12261e-12	0	2.47997	13.0195	14.0086	12.6397	13.8701	13.6941	15.1904	16.4915	16.0065	16.0736	15.9648	15.3287	15.8153	13.1099	12.4862	13.0769	13.3737	13.1855	12.6665	15.0116	14.8357	16.5415	16.2934	15.2218	14.8745
A0A287B7B9;A0A287BEM9;A0A5G2QVI0;A0A5S6FYV9;A0A5S6I1G3;Q07717	B2M	A0A287B7B9_PIG;A0A287BEM9_PIG;A0A5G2QVI0_PIG;A0A5S6FYV9_PIG;A0A5S6I1G3_PIG;B2MG_PIG	Beta-2-microglobulin	1.83545e-09	0	1.11983	15.9496	15.4185	15.3603	15.5253	14.9845	16.3965	16.3673	16.3824	16.5217	16.3312	16.7837	15.9452	15.4986	15.1118	15.6082	14.8885	15.5975	14.6435	15.8707	16.6535	16.1115	16.5098	16.2928	16.6288
A0A287AKL0;F1S9C0;F6Q5X1;P0DSO0	;SAA3;;SAA2	A0A287AKL0_PIG;F1S9C0_PIG;F6Q5X1_PIG;SAA2_PIG	Serum amyloid A protein;Serum amyloid A protein;Serum amyloid A protein;Serum amyloid A-2 protein	1.14516e-08	0	3.81177	17.7558	15.4039	18.4132	13.7787	18.0801	18.1964	18.8328	17.8799	18.6921	19.4331	17.2109	18.5672	13.2395	17.1402	17.1642	14.0872	15.8094	13.9907	18.9005	19.5816	20.5919	18.8128	18.2332	18.1818
Q29056	IL1RN	IL1RA_PIG	Interleukin-1 receptor antagonist protein	0	0	5.66578	12.3123	9.762	12.6299	10.9753	11.4426	10.7916	13.8969	17.4586	16.8138	15.2877	17.067	15.4178	9.91533	9.79857	11.4603	10.9463	9.98964	9.47443	14.0381	16.417	15.1865	17.4175	16.415	16.1052
A0A287BBJ9	PCSK9	A0A287BBJ9_PIG	Proprotein convertase subtilisin/kexin type 9	4.4853e-14	0	-1.52078	16.6074	15.6935	16.6132	16.344	16.4041	16.2687	14.6824	15.3376	14.2628	15.2238	15.264	15.1873	16.327	16.8218	16.772	16.9383	17.0364	16.2489	15.6001	15.063	15.2947	15.5981	14.7849	14.6789
F1SCC7	LOC396684	F1SCC7_PIG	SERPIN domain-containing protein	0	0	1.74202	20.6341	20.4938	20.6618	20.5395	20.2238	21.1501	21.9668	21.7451	21.971	22.4455	21.8747	22.1759	20.7206	20.8835	19.7971	21.122	20.4341	20.2626	22.1982	22.341	22.6927	22.3293	21.9582	22.1525
A0A286ZIU5;A0A287ARJ8;F1SCC6	SERPINA3-2	A0A286ZIU5_PIG;A0A287ARJ8_PIG;F1SCC6_PIG	SERPIN domain-containing protein	0	0	3.8682	17.2784	17.4144	18.6547	16.371	18.5128	18.3724	21.6311	21.3394	19.8912	21.5598	20.782	20.9841	16.7637	17.992	16.5262	18.048	15.2896	18.7067	21.0307	21.0801	21.6745	21.5729	20.7248	20.4525
A0A286ZVN0	LOC106504547	A0A286ZVN0_PIG	SERPIN domain-containing protein	0	0	5.06428	16.1707	16.3764	15.9349	17.6793	15.8145	18.73	20.8854	20.7598	19.1926	20.225	19.6484	21.1415	16.1003	18.1351	13.3584	17.3446	15.7219	15.4221	20.5671	20.794	21.9038	21.5748	21.3566	20.2718
A0A286ZTY5	CFAP99	A0A286ZTY5_PIG	Cilia and flagella associated protein 99	0	0	4.94509	10.8501	10.0049	12.2034	12.3497	11.4599	13.8488	16.2689	16.1065	15.2134	16.8208	15.3191	16.4049	12.1188	10.1909	10.9474	13.222	11.7291	10.6564	16.1805	16.5852	15.518	17.131	16.875	16.2453
P51525	NA	PF12_PIG	Prophenin-2	1.74963e-07	1e-05	1.93974	13.1736	12.981	12.4626	12.484	11.7812	12.4023	14.9592	14.7739	15.2795	14.7125	15.8448	14.4793	11.785	13.3912	11.8115	13.4633	11.2585	10.9168	13.443	13.9497	14.5061	14.6957	13.865	13.8052
I3LQH7	BLVRB	I3LQH7_PIG	Biliverdin reductase B	1.67473e-07	1e-05	-1.20082	17.294	18.1727	17.3186	18.0794	17.55	17.5878	17.7804	18.1577	17.9305	18.1079	17.5349	17.5417	18.3301	18.5328	18.187	19.9969	18.5704	18.3751	17.515	17.5219	17.0982	17.6974	17.2429	17.712
A0A5G2QZ16;F1RWJ5	KPNB1	A0A5G2QZ16_PIG;F1RWJ5_PIG	Karyopherin subunit beta 1;Importin subunit beta-1	3.81819e-07	1e-05	-1.36122	13.1585	13.6041	13.119	12.9522	13.1525	13.0948	13.3174	13.9304	13.9628	12.8556	13.0163	12.8415	13.6769	14.5436	14.1516	15.8291	14.3977	14.3177	12.863	13.3604	12.678	13.2983	13.1377	13.4121
Q69DK8	NA	C1S_PIG	Complement C1s subcomponent	1.50411e-07	1e-05	0.72011	17.5771	17.8879	17.285	17.8811	17.6187	17.7575	18.388	17.765	18.3332	18.1184	18.5595	18.1409	17.5031	17.4806	17.4704	17.5467	17.6097	18.0815	18.1462	18.4151	18.6731	18.479	17.9866	18.3127
A0A5G2QEW1	ITIH4	A0A5G2QEW1_PIG	Inter-alpha-trypsin inhibitor heavy chain H4	6.7753e-07	2e-05	0.747388	21.7388	21.9284	22.0343	22.5279	21.9005	22.0812	22.2219	21.8522	22.0869	22.1864	21.9285	22.2906	21.6921	21.6501	21.3315	22.1684	21.6593	21.0182	22.0002	22.4702	22.4737	22.1566	22.5111	22.3923
F1S268	CREG1	F1S268_PIG	Cellular repressor of E1A stimulated genes 1	9.562e-07	3e-05	-0.536796	14.4955	13.9305	14.4198	14.172	14.0006	14.2216	13.6944	13.9211	13.9948	13.9094	13.7016	14.3319	14.7558	15.1893	14.866	15.3038	15.2979	14.86	14.4616	14.3512	14.6726	14.6371	14.6524	14.2771
A0A480KNV0;A0A5G2QFI9;Q2HXZ9	SAA3	A0A480KNV0_PIG;A0A5G2QFI9_PIG;Q2HXZ9_PIG	Serum amyloid A protein	8.08628e-07	3e-05	1.95862	14.2838	10.5628	15.4292	13.0693	14.3941	13.6291	17.366	16.9756	17.9598	17.3829	17.6341	15.7023	15.051	14.6071	14.8209	14.9182	15.11	15.1674	15.7732	17.4208	17.8986	17.3471	16.414	16.5726
F1S4I1	GOLM1	F1S4I1_PIG	Golgi membrane protein 1	1.29927e-06	4e-05	-0.17632	20.6031	20.4222	20.307	20.2939	20.1005	20.5866	20.2498	20.1419	20.4583	20.3496	20.19	20.5118	20.3658	20.3685	20.1523	20.272	20.3619	20.1942	20.1063	20.0594	20.1087	20.0664	20.2121	20.1039
P50828	HPX	HEMO_PIG	Hemopexin	2.39296e-06	7e-05	0.698918	17.9557	17.6299	17.5577	18.0555	18.0391	17.9128	17.5796	17.4536	17.651	17.2411	17.6081	18.278	17.935	18.9561	17.663	18.1233	18.2278	17.9125	18.9304	18.665	18.8714	18.7503	18.9022	18.8918
F1S8R6	C8H4orf48	F1S8R6_PIG	Uncharacterized protein	2.85434e-06	9e-05	-0.253604	16.6377	16.5021	16.4462	16.8709	16.3039	16.5421	16.2589	16.1187	16.4808	16.625	16.1707	16.5263	16.5791	16.4511	16.262	16.359	16.5851	16.1049	16.1054	16.0565	16.1993	16.2672	16.1539	16.0373
A0A286ZJ21;A0A287ADL0;I3LEW0	COLEC11	A0A286ZJ21_PIG;A0A287ADL0_PIG;I3LEW0_PIG	Collectin subfamily member 11	3.3825e-06	0.0001	-0.311786	17.2025	16.9531	16.9932	16.8296	16.9196	17.1232	16.7237	16.7212	16.6636	16.632	16.425	16.7702	16.8247	17.1647	16.6652	16.5948	16.9055	16.5136	16.3926	16.5339	16.605	16.4567	16.5268	16.2827
P80928	MIF	MIF_PIG	Macrophage migration inhibitory factor	3.63163e-06	0.0001	-0.946056	16.9184	17.1246	16.5477	16.9306	17.0258	16.9995	16.8511	18.0106	17.4423	17.2016	17.5837	16.4666	17.4463	17.1449	17.4373	18.2916	17.4022	17.8112	16.6795	16.798	16.4666	16.7227	16.6774	16.5128
A0A5S6HM44;Q8SPS7	HP	A0A5S6HM44_PIG;HPT_PIG	Haptoglobin	4.47779e-06	0.00012	1.92326	19.7719	17.6183	18.6835	18.4046	18.3115	20.1801	20.8623	22.1451	21.6702	22.1871	20.2716	21.5354	21.2338	19.5738	19.7373	21.3209	20.4315	20.0251	22.3094	21.9958	22.6981	22.5007	22.2207	22.1373
P02067	HBB	HBB_PIG	Hemoglobin subunit beta	4.57651e-06	0.00012	-0.954627	25.5495	26.3005	25.922	26.0519	26.0442	25.9611	26.0194	26.3376	25.9812	26.3137	25.5867	25.4467	26.5831	26.1996	26.564	27.6153	26.0944	26.6545	25.9038	25.8433	25.3449	25.8299	25.4224	25.6391
A0A5G2R1Q1;F1SB67	IGF2R	A0A5G2R1Q1_PIG;F1SB67_PIG	Fibronectin type-II domain-containing protein;Insulin-like growth factor II receptor	5.33741e-06	0.00014	-0.299434	17.8248	17.7258	17.7325	17.7288	17.59	17.8137	17.6664	17.6528	17.8619	17.5172	17.5326	17.7358	17.6285	17.9853	17.6698	17.6841	17.8623	17.4715	17.6627	17.5049	17.3655	17.1745	17.4944	17.3028
A0A5G2RIC7;K7GQL2	F13A1	A0A5G2RIC7_PIG;K7GQL2_PIG	Coagulation factor XIII A chain	7.33955e-06	0.00018	-0.348981	16.8607	16.7237	16.1419	16.705	16.2173	16.6611	16.4918	16.4586	16.3596	15.809	16.4007	16.7875	16.6418	16.9374	16.0917	16.5743	16.5516	16.1399	16.499	15.9126	16.2016	15.841	16.0936	16.295
F1RWA3;G9K122;K7GPB4	MRC1	F1RWA3_PIG;G9K122_PIG;K7GPB4_PIG	Uncharacterized protein;Macrophage mannose receptor 1;Uncharacterized protein	7.17677e-06	0.00018	0.674232	15.6498	15.5634	15.0372	15.1393	15.0634	15.4302	16.007	16.1456	16.65	15.9407	16.3415	16.0009	15.2701	15.0863	14.8912	15.1766	15.6071	15.1051	15.3992	15.9705	15.9334	15.8522	16.0152	16.0112
A0A5G2QYD9;A0A5G2RAT8;P00172	CYB5A	A0A5G2QYD9_PIG;A0A5G2RAT8_PIG;CYB5_PIG	Cytochrome b5	1.43654e-05	0.00034	2.69672	14.799	14.0172	14.453	15.8447	15.6437	15.5813	13.7068	14.6142	14.7605	14.3562	13.709	17.5705	14.0388	14.1269	14.4744	15.5669	14.7273	14.5057	18.6962	15.7583	16.897	18.6926	15.666	17.9101
A0A286ZND5;F1S3U9	PRDX1	A0A286ZND5_PIG;F1S3U9_PIG	Peroxiredoxin	1.54099e-05	0.00035	-0.887278	15.6377	15.4706	15.5818	15.5009	15.4955	15.3716	15.7599	16.613	15.8505	15.8521	16.0203	15.4224	16.0007	16.0417	15.866	17.4574	16.0033	16.2171	15.2038	15.4299	15.3593	15.3856	15.3078	15.5763
Q8MJ80	HAMP	HEPC_PIG	Hepcidin	1.73324e-05	0.00038	7.44452	12.5625	7.83641	12.0508	6.36333	13.681	9.0156	13.7168	12.2037	13.2463	11.844	11.3354	13.1818	9.33089	11.9888	9.92858	0	0	0	11.7055	13.4098	14.5259	11.3725	13.3209	11.5808
P49930	PMAP23	PMP23_PIG	Antibacterial peptide PMAP-23	1.81483e-05	0.00039	3.17448	11.9628	10.8529	9.05339	8.1207	8.13444	9.28377	12.1169	12.4196	13.4975	10.182	13.5329	12.3248	8.93355	8.73251	7.74512	9.35034	7.73419	9.95281	12.3402	12.3167	13.511	13.1043	11.4988	8.72439
F1S3Q8	VNN3	F1S3Q8_PIG	Pantetheinase	2.13443e-05	0.00045	0.966512	16.4518	16.1347	15.7895	16.7017	16.3317	16.1414	16.7169	16.0025	16.6462	16.6869	16.1522	16.4263	15.6226	16.2908	15.7537	15.7808	14.652	15.2572	16.5864	16.988	16.4872	15.9671	16.9019	16.2256
F1S6S9	PRTN3	F1S6S9_PIG	Proteinase 3	5.18513e-05	0.00107	2.46377	10.6882	12.7581	13.1358	14.2306	13.075	13.6827	15.5895	15.2019	16.4163	15.4977	15.9883	15.1278	10.7334	12.115	13.5187	12.464	12.0895	15.7004	14.6514	15.5237	15.0485	16.0611	15.2296	14.8893
I3LF89	CPN2	I3LF89_PIG	Carboxypeptidase N subunit 2	5.58044e-05	0.00112	0.642654	17.4691	17.613	18.1596	18.1093	18.0033	18.218	17.9015	18.0392	18.7434	18.378	18.0413	17.9411	17.8432	17.7624	17.4452	18.3551	18.1933	17.4559	18.2451	18.3793	18.2593	18.6226	18.8096	18.5953
F1RWV2;P35624	TIMP1	F1RWV2_PIG;TIMP1_PIG	Metalloproteinase inhibitor 1	8.68667e-05	0.00171	0.9797	16.1842	15.6968	16.1187	16.1719	15.907	16.4331	17.1738	17.1429	18.1757	17.1656	17.9393	16.223	15.028	15.4073	15.9274	15.63	15.5942	15.8687	16.6596	16.7362	16.3239	17.0277	16.3172	16.2692
A0A5G2R1R6;F1SPS7;I3LFX8;P19205	APEH	A0A5G2R1R6_PIG;F1SPS7_PIG;I3LFX8_PIG;ACPH_PIG	Acylamino-acid-releasing enzyme	8.99869e-05	0.00173	-1.69537	11.6145	13.1226	11.9861	13.293	12.3755	12.55	12.4107	13.0123	12.7669	12.7838	12.0584	11.3791	12.7214	13.6607	13.8071	15.7281	13.6116	14.0218	12.4584	12.6782	10.8262	12.0562	12.4529	12.9067
A0A5G2QK06;A0A5G2RD35;K9IWA3	ATP6AP1	A0A5G2QK06_PIG;A0A5G2RD35_PIG;K9IWA3_PIG	ATPase H+ transporting accessory protein 1	9.5766e-05	0.0018	-0.913063	14.9341	15.6255	15.5741	15.7396	15.2035	15.4174	15.4032	15.5809	15.5162	15.6654	15.3174	14.5319	15.4715	15.1015	16.4271	17.0519	15.992	15.5079	15.2587	14.7034	14.5918	15.4394	15.1154	14.965
A0A286ZR66;A0A286ZVK1	F11	A0A286ZR66_PIG;A0A286ZVK1_PIG	Coagulation factor XI	0.000114704	0.00211	2.01779	16.6688	14.0283	15.3748	15.4234	14.4679	17.2236	16.8877	18.6962	17.9829	18.6476	16.0203	17.7788	17.1358	16.2395	16.1421	17.3403	17.1082	16.1029	18.3729	18.4175	19.0659	18.9811	18.7225	18.6157
F1RFQ7	RAN	F1RFQ7_PIG	GTP-binding nuclear protein Ran	0.000130915	0.00236	-1.12522	14.3541	14.9182	14.8037	15.0253	14.6621	14.6195	14.7335	15.3566	14.7599	15.2846	14.215	14.1135	14.9768	15.0316	15.4768	17.0201	15.1845	15.6387	14.4774	14.6841	14.036	15.0603	14.2237	14.0956
A0A287AG70;Q8MJ14	GPX1	A0A287AG70_PIG;GPX1_PIG	Glutathione peroxidase;Glutathione peroxidase 1	0.000145299	0.00247	-1.36975	13.6001	14.4058	14.1503	13.7171	14.3022	13.8084	14.1028	15.3191	14.6462	14.7889	14.3913	13.5831	14.5204	13.475	14.822	16.1031	13.8918	15.4645	13.7054	13.1126	12.4576	13.6145	13.4888	13.6794
A0A286ZYQ3	FGL1	A0A286ZYQ3_PIG	Fibrinogen like 1	0.000145462	0.00247	0.711667	16.4769	16.2101	16.4894	16.2321	16.1745	16.7354	16.7413	17.8061	16.7071	16.8516	16.9028	16.4446	17.0589	16.2417	16.4445	16.8712	16.6664	16.5636	17.3343	17.299	17.6355	17.5326	16.9998	17.3149
A0A287BIL8	HSPA5	A0A287BIL8_PIG	Endoplasmic reticulum chaperone BiP	0.000140672	0.00247	0.577193	15.6184	15.4752	15.3285	15.6235	15.2596	15.7556	15.9307	16.3287	16.2301	15.515	16.2438	15.8722	15.0168	15.3175	15.0253	15.1575	15.1413	15.3596	15.1945	15.4858	15.8968	15.9814	15.9467	15.9759
A0A5G2Q9S0;Q2EN76	NME2	A0A5G2Q9S0_PIG;NDKB_PIG	Nucleoside diphosphate kinase;Nucleoside diphosphate kinase B	0.000151928	0.00253	-1.41349	14.0902	13.5955	12.6629	13.7947	13.1304	13.9833	12.1992	14.9655	13.8703	13.7641	13.6032	12.6859	15.4436	13.8018	14.1019	15.051	13.9034	14.7366	12.8667	12.9024	13.166	13.2717	12.8469	13.5038
A0A5G2R5F2;F1SD66	CHGA	A0A5G2R5F2_PIG;F1SD66_PIG	Chromogranin-A	0.000155901	0.00255	1.27312	12.7816	12.6104	11.5834	12.3706	12.4814	13.1343	15.1264	15.8131	14.8171	14.9273	14.4994	14.5077	11.9592	12.8957	12.8072	13.4609	13.4946	13.252	13.3754	14.639	13.346	14.9442	14.5311	14.6728
A0A286ZI97	PGLYRP1	A0A286ZI97_PIG	Peptidoglycan-recognition protein	0.000170547	0.00274	1.72949	12.9223	12.2211	11.506	10.9336	12.0757	11.8641	13.725	13.2032	14.2593	13.1991	13.9343	13.8675	8.9678	13.323	11.7166	11.6339	12.0917	10.7305	13.111	13.4237	13.2498	13.4672	12.9188	12.6699
P42831	CCL2	CCL2_PIG	C-C motif chemokine 2	0.000211885	0.00334	2.20468	9.86987	10.4429	11.5222	12.1183	11.7122	10.9656	13.9858	12.6144	14.2819	11.7104	14.2192	11.2217	10.0422	11.3599	11.7892	10.9882	11.489	11.2387	12.7265	14.1001	11.8511	14.6071	13.3453	13.5052
F1SAE9	LAMB1	F1SAE9_PIG	Laminin subunit beta 1	0.000232827	0.0036	-0.149864	18.379	18.4081	17.9233	18.5216	17.9867	18.3505	17.9016	18.1188	18.7691	18.1629	18.1921	18.4192	18.3989	18.5397	18.0278	18.1963	18.5063	18.1624	18.1098	18.1743	17.9608	18.2185	18.2011	18.2677
A0A287AYJ5;A0A5G2QMH2;A0A5G2QWZ8;A0A5G2R419;F1RN32;K7GQB9	GAS6	A0A287AYJ5_PIG;A0A5G2QMH2_PIG;A0A5G2QWZ8_PIG;A0A5G2R419_PIG;F1RN32_PIG;K7GQB9_PIG	Uncharacterized protein	0.000236909	0.0036	-0.799955	13.7594	14.17	14.1401	13.8902	13.9395	13.959	13.8151	14.2194	14.261	13.8241	13.8814	13.8023	13.481	14.2364	14.0751	15.4246	14.4636	14.5179	13.2325	13.6582	13.5295	14.0711	13.624	13.2837
A0A286ZZL6;A0A287ALG9;A0A5G2Q9S9;A0A5G2QPH4;A0A5G2R267;F1SGT2;K7GLU2	APIP	A0A286ZZL6_PIG;A0A287ALG9_PIG;A0A5G2Q9S9_PIG;A0A5G2QPH4_PIG;A0A5G2R267_PIG;F1SGT2_PIG;K7GLU2_PIG	Methylthioribulose-1-phosphate dehydratase	0.000248914	0.00372	-1.37781	13.8177	13.4826	13.5983	13.1138	13.2562	13.6432	13.0691	14.4485	13.2033	13.9816	13.54	13.498	13.9324	13.6064	13.8227	14.4076	13.0163	13.6521	13.1316	13.2902	10.6284	11.7031	12.8576	12.5597
F1SUE4	ASPN	F1SUE4_PIG	Asporin	0.000282501	0.00415	-0.321573	15.7045	15.7327	15.4078	15.7105	15.45	15.3112	15.2762	15.3052	15.6423	15.18	15.4881	15.3955	15.5716	15.4811	15.4996	15.6749	15.4117	15.6621	15.0824	15.4628	15.0759	15.2735	15.2331	15.2439
A0A287AB01;A0A5G2QBI5;A0A5G2QRV2;I3LNI2	TFG	A0A287AB01_PIG;A0A5G2QBI5_PIG;A0A5G2QRV2_PIG;I3LNI2_PIG	Trafficking from ER to golgi regulator	0.000297902	0.0043	-4.39101	13.9393	15.9835	15.0548	14.0694	17.4791	14.8347	16.011	15.8164	14.6324	14.2325	15.7704	14.9426	15.5109	22.5156	16.5481	15.2494	22.3552	22.151	14.5301	17.5349	14.8736	12.5984	14.0671	14.3801
I3LQ84	COL6A2	I3LQ84_PIG	Collagen type VI alpha 2 chain	0.00031469	0.00433	-0.506405	16.038	16.2392	16.0744	16.2735	16.1462	16.2678	15.951	16.0447	16.0081	15.8016	16.6094	15.368	16.0165	15.9457	16.1836	15.827	16.1648	16.4042	15.6759	15.6913	15.3836	15.7243	15.452	15.5763
A0A5G2RHA4;I3L651	FGB	A0A5G2RHA4_PIG;I3L651_PIG	Fibrinogen beta chain	0.000313084	0.00433	0.375611	23.351	23.4015	23.9219	23.3276	23.9033	23.0875	24.2673	24.1491	23.4209	23.9631	23.5405	23.4199	23.1392	23.8166	23.7477	23.723	23.6542	23.4978	24.1567	24.0104	24.2759	23.9234	23.6846	23.7812
F1RS37	POSTN	F1RS37_PIG	Periostin	0.000315228	0.00433	-1.26825	21.4438	21.3743	19.4928	20.7693	20.0729	20.4918	19.4708	19.0392	19.1078	19.5459	20.5875	19.4539	19.7032	20.644	19.7008	19.6849	20.382	21.1056	19.6823	19.0358	18.801	18.6959	18.2673	19.1288
A0A287AX04;A0A5G2QIG1;A0A5K1UHA8;F1RYU5;K7GSK1	ART3	A0A287AX04_PIG;A0A5G2QIG1_PIG;A0A5K1UHA8_PIG;F1RYU5_PIG;K7GSK1_PIG	NAD(P)(+)--arginine ADP-ribosyltransferase	0.000349234	0.00473	0.458506	15.4299	15.5119	15.2321	15.0842	15.5352	15.1247	15.6907	15.5272	15.29	15.3835	14.9969	15.2789	14.2522	15.208	15.3737	14.4787	14.2869	15.1603	15.2107	15.7299	15.4433	15.1197	14.7994	15.2078
F1SFA7	COL1A2	F1SFA7_PIG	Fibrillar collagen NC1 domain-containing protein	0.00035869	0.00478	-0.616571	18.879	19.2081	18.3815	19.2832	19.0747	18.9238	18.4356	18.7312	18.8649	18.5155	18.8806	18.0097	18.2716	17.9065	17.7874	17.9057	18.0094	18.417	17.5696	17.5011	17.7701	17.0747	17.1962	17.4864
P04404	CHGA	CMGA_PIG	Chromogranin-A (Fragment)	0.000380826	0.005	0.891559	15.6488	15.6835	15.8098	15.375	15.7945	15.1036	17.3752	18.3451	17.288	17.271	17.3659	16.9955	15.3038	15.6543	15.7531	15.5925	16.026	16.0347	15.987	16.7349	16.2713	17.5237	17.0885	16.1085
A0A5G2QZC6;A0A5G2RGI4	UBE2NL	A0A5G2QZC6_PIG;A0A5G2RGI4_PIG	Ubiquitin conjugating enzyme E2 N like (gene/pseudogene)	0.000400023	0.00517	-1.40752	13.5738	14.3536	13.1633	14.18	13.8148	14.2018	13.8072	14.9988	14.5163	14.0383	14.4989	12.0606	14.4062	14.396	14.4645	15.8859	14.589	14.7111	13.4756	13.838	12.3589	13.4582	13	13.8769
A0A5G2Q6W7;F1S3J9	ICAM1	A0A5G2Q6W7_PIG;F1S3J9_PIG	Uncharacterized protein;Intercellular adhesion molecule 1	0.000407178	0.00519	0.498124	14.3454	14.6018	14.5547	14.0303	14.5463	14.1577	15.4648	15.3232	15.2548	15.3497	14.9957	14.8605	14.0695	14.0214	14.5546	14.5081	14.4089	14.1188	15.0027	14.9231	14.5864	15.0746	14.641	14.4422
P12067;P12068;P12069	NA	LYSC1_PIG;LYSC2_PIG;LYSC3_PIG	Lysozyme C-1;Lysozyme C-2;Lysozyme C-3	0.000467777	0.00587	0.955043	11.4988	11.7031	12.1784	12.6861	12.7018	11.4407	14.6875	13.8695	13.7801	13.3882	14.6926	13.3374	12.7934	11.6277	13.2751	12.9758	12.1149	13.0863	13.6504	13.7903	13.5484	14.3552	12.8217	13.4374
A0A287AL89;A0A5G2QCT3;F1SM61	FBLN1	A0A287AL89_PIG;A0A5G2QCT3_PIG;F1SM61_PIG	Fibulin-1	0.00051014	0.00631	-0.325307	21.5564	21.5003	21.6022	21.5028	21.6489	21.0037	21.5813	21.4472	21.3293	21.5483	21.5006	21.4911	21.371	21.4603	21.4237	21.1549	21.377	21.2434	20.9801	20.9168	20.954	21.2645	21.0258	20.9372
P00355	GAPDH	G3P_PIG	Glyceraldehyde-3-phosphate dehydrogenase	0.000651612	0.00795	-1.26522	16.8726	16.4097	15.7342	15.7119	16.3486	16.6511	16.1587	18.1552	17.1766	16.3575	16.9921	15.9933	17.1961	17.2372	16.7875	18.5576	16.49	17.5146	15.3243	16.2057	16.3594	16.0244	16.0275	16.2504
A0A287BGV6;A0A480I6I0;A0A5G2QE84;F1S285;K7GT00	COL14A1	A0A287BGV6_PIG;A0A480I6I0_PIG;A0A5G2QE84_PIG;F1S285_PIG;K7GT00_PIG	Collagen type XIV alpha 1 chain;Collagen alpha-1(XIV) chain;Collagen type XIV alpha 1 chain;Collagen type XIV alpha 1 chain;Collagen alpha-1(XIV) chain isoform X2	0.00067164	0.00808	-0.596392	15.0663	15.348	15.2718	15.3586	14.9507	15.2126	15.1887	14.7169	15.2027	14.5927	15.5011	14.3578	15.5498	15.3096	15.2976	14.9557	15.5764	15.3848	15.2529	14.89	14.6116	14.7323	14.3895	14.6192
A0A5G2R7M3	ITIH4	A0A5G2R7M3_PIG	Inter-alpha-trypsin inhibitor heavy chain H4	0.000737718	0.00875	0.405544	23.5415	23.4891	23.7768	23.9461	23.5868	23.6103	23.8714	23.4344	23.8421	23.8993	23.2792	24.0045	23.5957	23.4676	23.6146	23.8905	23.6988	23.3202	24.0347	23.9901	24.0645	24.0341	23.9585	23.9387
K7GPT9	CFB	K7GPT9_PIG	Complement factor B	0.00080068	0.00937	0.39915	21.4956	21.8899	22.0165	21.7075	21.8809	21.5833	22.3069	21.9145	21.9815	22.3792	22.1022	22.1274	21.6647	21.8425	21.745	22.1217	21.5825	22.0023	22.3561	22.2112	22.4542	22.3828	22.0993	21.85
A0A286ZKB4;A0A287AIM8	C5	A0A286ZKB4_PIG;A0A287AIM8_PIG	Complement C5a anaphylatoxin	0.000894104	0.01032	0.297427	19.596	19.7656	19.8485	19.7502	19.7905	20.0097	19.8102	19.5717	19.839	19.9938	19.8281	19.8602	19.8949	20.0905	19.8042	19.9761	20.0827	19.6305	20.1816	20.3056	20.2953	20.158	20.3658	19.9572
A0A286ZN92;A0A287AGI2;A0A287B8T0;A0A287BJL7;A0A5S6H3C2;A0A5S6I4J7;P23695	IGF2	A0A286ZN92_PIG;A0A287AGI2_PIG;A0A287B8T0_PIG;A0A287BJL7_PIG;A0A5S6H3C2_PIG;A0A5S6I4J7_PIG;IGF2_PIG	Insulin-like growth factor II	0.00122678	0.01398	-0.62822	17.8677	16.5972	16.9991	17.3398	16.7309	17.4111	16.8767	17.037	16.5418	16.9655	17.0931	17.2735	18.0587	18.1446	18.0761	18.3828	18.4845	17.9151	17.3088	17.101	17.8049	17.9449	17.3699	17.7631
A0A287AW67;F1SD70	LGMN	A0A287AW67_PIG;F1SD70_PIG	Legumain	0.00133368	0.015	-0.522019	15.1664	14.5281	15.154	14.7626	14.871	14.2771	14.7651	15.1247	15.1974	15.0928	15.1421	14.6561	15.1108	15.3742	15.2598	15.337	16.0269	15.0527	14.5859	14.8585	15.2447	14.7808	14.8414	14.7179
I3LDM1	POSTN	I3LDM1_PIG	Periostin	0.00135877	0.01509	-1.01622	18.089	18.0242	16.2122	17.1827	16.8494	16.7628	16.7624	16.1279	15.928	16.3974	17.4333	16.2221	16.6933	16.9884	16.5484	16.6722	16.7579	17.7568	16.5895	15.9243	15.6656	15.5535	15.6486	15.9382
I3LJP2	SELENOP	I3LJP2_PIG	Uncharacterized protein	0.00148643	0.01629	-0.269514	17.3152	17.7468	17.3589	17.2887	17.2614	17.157	17.4401	17.0851	17.1972	17.2769	17.1391	17.1976	17.2657	17.4882	17.4262	17.1958	17.4826	17.582	17.232	17.1848	17.0973	17.1419	17.0518	17.1156
I3LVL5	CRISP3	I3LVL5_PIG	Cysteine rich secretory protein 3	0.00153793	0.01665	0.427358	16.8723	17.2615	16.9371	17.2611	16.9785	16.7444	18.1934	17.5982	17.931	17.6107	17.9476	18.1466	16.9767	17.0131	16.9583	16.6631	17.0574	17.0738	17.1401	17.2978	17.5602	17.7663	17.4687	17.0735
A0A5G2QGA4	CRP	A0A5G2QGA4_PIG	C-reactive protein	0.00165138	0.01766	1.05556	16.0089	15.9187	17.4004	16.6615	16.1493	16.7073	17.6445	17.6402	16.4271	18.8602	17.0056	17.5513	15.5525	16.1612	16.8622	16.5341	14.9496	15.6017	16.8846	17.2209	17.545	16.8603	16.5409	16.9429
F1RX36	FGA	F1RX36_PIG	Fibrinogen alpha chain	0.00171918	0.01816	0.385231	22.8477	22.9363	23.3957	22.9831	23.3991	22.9558	23.7162	23.7792	23.0771	23.534	23.0576	22.8059	22.8063	23.2623	23.1887	23.3839	23.3981	23.0563	23.6598	23.5338	23.6975	23.4959	23.5001	23.5199
F1S7K2	PLIN5	F1S7K2_PIG	Perilipin 5	0.00190931	0.01992	0.550103	15.9784	15.9812	16.999	16.3891	16.2641	16.5188	16.4214	16.7254	16.2985	17.5845	16.9927	16.2867	16.1256	15.8265	16.1973	16.2725	15.705	16.7801	16.9008	16.6127	17.2918	16.7591	16.1852	16.4579
A0A287B6M0;F1RXC2	CA2	A0A287B6M0_PIG;F1RXC2_PIG	Carbonic anhydrase	0.00216579	0.02233	-0.687564	16.7279	16.7968	15.7978	16.4237	16.0203	16.3146	15.9988	16.6417	16.7824	16.0866	15.9854	16.305	17.9036	16.5559	16.3184	18.0079	16.3016	16.6631	16.546	16.5513	16.115	16.0159	16.1	16.297
A0A287A1S6;A0A287BLD2;A0A5G2QQE9	COL1A1	A0A287A1S6_PIG;A0A287BLD2_PIG;A0A5G2QQE9_PIG	Collagen alpha-1(I) chain preproprotein;Collagen type I alpha 1 chain;Collagen type I alpha 1 chain	0.00222802	0.0227	-0.589771	19.9652	20.3157	19.3152	20.4432	19.5755	20.0729	19.2656	19.696	19.8276	19.5324	20.0668	19.4119	19.284	19.1532	18.9231	19.1803	18.9675	19.4486	18.6021	18.2742	19.1308	18.4242	18.365	18.6217
A0A5G2QVP2;I3L8B2	COL9A2	A0A5G2QVP2_PIG;I3L8B2_PIG	Uncharacterized protein	0.00236763	0.02384	-1.22694	11.8564	12.3335	12.6858	13.6899	13.2803	13.4702	13.5276	13.6402	13.3297	12.4309	13.8888	13.2541	11.8462	11.6276	11.994	12.698	13.5209	13.2724	11.0902	12.3177	11.7759	11.0474	10.356	11.0101
A0A287B4B7;A0A5G2QSK4	GDI2	A0A287B4B7_PIG;A0A5G2QSK4_PIG	Rab GDP dissociation inhibitor	0.00243019	0.02419	-1.33058	13.3127	13.1912	12.5765	12.9478	13.233	12.9316	12.8602	14.9453	14.3291	13.5579	14.1606	12.0527	14.6666	13.1142	13.7079	15.2105	13.5331	14.4992	13.0914	13.281	12.6392	12.9881	11.8631	12.8852
A0A5G2R5W3;K7GKY0	CD109	A0A5G2R5W3_PIG;K7GKY0_PIG	CD109 molecule;CD109 antigen isoform 1 preproprotein	0.00285513	0.0281	-0.297868	19.2573	19.7604	19.4353	19.2688	19.367	19.326	19.4454	19.4723	19.4576	19.5597	19.2746	19.3983	19.3348	19.4581	19.3355	19.2487	19.4131	19.438	19.362	19.093	19.1641	19.2059	18.6911	18.9248
A0A287AEY7;A0A287BHG5;A0A5G2QIS5;A0A5G2QTD7;A0A5G2QV88	VSIG4	A0A287AEY7_PIG;A0A287BHG5_PIG;A0A5G2QIS5_PIG;A0A5G2QTD7_PIG;A0A5G2QV88_PIG	V-set and immunoglobulin domain containing 4	0.00301352	0.02932	0.604076	10.5519	11.6163	11.5021	11.6598	11.7797	11.1685	12.726	13.2265	12.1444	12.6741	13.0257	11.37	11.1358	9.99451	11.6846	11.1769	11.7617	12.1388	11.6984	12.4698	11.8439	12.3757	11.6799	11.449
A0A5G2QUU1;F1RX35;I3LJW2	FGG	A0A5G2QUU1_PIG;F1RX35_PIG;I3LJW2_PIG	Fibrinogen gamma chain	0.00319761	0.03077	0.436401	23.0699	23.2423	23.7624	23.2035	23.6353	22.9893	24.0518	23.9681	23.2679	23.9773	23.0741	23.2078	23.0897	23.4726	23.4326	23.6663	23.5187	23.2508	23.7694	23.813	24.0983	23.8669	23.6821	23.8196
O62839	CAT	CATA_PIG	Catalase	0.00327387	0.03116	-1.03538	15.7339	15.3254	14.2155	14.7698	14.4535	14.9398	14.9773	15.6483	15.6258	15.2344	14.8611	14.7859	16.9098	15.2795	15.047	16.6239	15.4068	15.7088	15.236	15.4163	14.885	14.1408	14.0239	15.0615
C6JWG4	FGF21	C6JWG4_PIG	Fibroblast growth factor	0.00379658	0.03535	1.39962	16.1996	16.6355	14.5159	15.769	14.7292	15.2622	15.0653	15.1876	14.3242	15.2444	15.5799	15.7094	11.1495	11.5652	11.0434	11.4546	10.4291	10.8205	10.2195	12.8412	13.4388	12.7678	12.7982	12.7945
A0A5G2R2W7	NA	A0A5G2R2W7_PIG	Uncharacterized protein	0.00379184	0.03535	-0.260177	14.8188	15.1335	15.3495	15.3361	15.1139	15.2192	15.2816	15.0431	15.6218	15.2325	15.0408	15.0162	15.2187	15.2025	15.3923	15.1662	15.2349	15.0613	15.1047	14.9937	14.9637	14.7373	14.9407	14.9747
A0A5G2QZN1;Q8MJ30	QDPR	A0A5G2QZN1_PIG;DHPR_PIG	Dihydropteridine reductase	0.00424784	0.03913	-1.92002	12.5715	13.0935	12.4297	11.4449	11.8595	12.6328	12.7274	13.4354	13.023	12.8761	12.913	10.0787	11.5116	12.885	13.0737	14.6803	12.0645	13.3282	9.35002	11.5583	9.47569	11.3897	13.2039	11.0456
F1S8V7	CPN1	F1S8V7_PIG	Carboxypeptidase N catalytic chain	0.00434465	0.0396	0.385697	14.8621	14.925	15.2766	14.9731	15.1945	15.4214	14.8372	15.3068	15.3776	15.1414	15.1577	15.3864	15.423	15.4878	15.2728	15.8665	15.5187	14.9776	15.7184	15.7747	15.8549	15.6689	15.8452	15.9985
K7GN89	IL18BP	K7GN89_PIG	Interleukin 18 binding protein	0.00463573	0.04182	5.86739	12.2634	12.3905	0	12.5142	10.4353	13.0754	16.0405	15.675	16.1751	16.2651	16.9281	14.8593	6.88809	13.3419	12.1486	0	11.665	11.0718	14.4016	15.6361	15.1145	15.4554	15.33	14.382
F1S567	VCAM1	F1S567_PIG	Uncharacterized protein	0.00513144	0.04581	0.395391	16.9208	16.969	16.9588	16.5987	16.5535	16.7031	17.4327	17.3752	17.3289	17.6458	17.6792	17.4651	16.7101	16.6081	16.7994	16.3168	17.3742	16.7086	16.9018	17.1094	17.3044	17.2348	17.1899	17.1493
A0A5G2QCV7;A0A5G2RDR7;F1RM55	MAN2A1	A0A5G2QCV7_PIG;A0A5G2RDR7_PIG;F1RM55_PIG	Mannosidase alpha class 2A member 1;Alpha-mannosidase;Alpha-mannosidase	0.00519318	0.04589	-0.709307	13.9556	13.9768	13.107	13.8015	13.163	13.2635	13.0479	13.4275	13.2705	13.2578	13.6595	12.915	14.0352	13.8853	13.5656	13.8079	13.0147	13.9438	13.5996	13.2603	12.814	13.3157	12.8117	12.1955
F1SGS9	CAT	F1SGS9_PIG	Catalase	0.00525587	0.04598	-0.860561	18.0228	17.3415	16.7275	16.7543	16.9135	17.0167	17.0219	17.7514	17.6638	17.1915	16.9341	17.2265	19.024	17.2624	17.2546	18.6186	17.4205	17.5227	17.243	17.2786	17.0263	16.8734	16.4517	17.0665
A0A480K168;F8S329	NA	A0A480K168_PIG;F8S329_PIG	Endogenous retrovirus group S71 member 1 Env polyprotein-like;Env protein	0.00540785	0.04637	0.559872	14.6386	14.6611	14.172	14.8134	14.5564	14.6002	14.7179	15.2309	15.4756	15.3037	15.3105	15.0319	13.4297	13.8877	14.0684	13.711	12.9846	13.9507	13.8216	14.1064	14.521	14.7596	14.0903	14.0925
P82460	TXN	THIO_PIG	Thioredoxin	0.00536165	0.04637	-0.697894	13.8767	13.9058	13.2288	13.6781	13.4896	13.498	14.136	14.369	13.8128	13.9319	14.0906	13.2271	14.2317	14.101	14	15.5215	14.4916	14.2049	13.9939	13.8598	13.3249	13.5288	13.5451	14.1106
F1RKG8	PEBP1	F1RKG8_PIG	Uncharacterized protein	0.00567299	0.04816	-0.966146	15.1024	14.7526	13.4681	14.5093	14.121	14.5679	14.7554	15.7376	15.2412	14.5276	15.0073	14.0789	14.9014	15.1483	14.9368	16.5529	15.124	15.1658	14.0362	13.7542	14.2776	14.6768	14.3473	14.9403
A0A287BKG2;F1S7U3	CHI3L1	A0A287BKG2_PIG;F1S7U3_PIG	Chitinase-3-like protein 1	0.00607138	0.05105	1.37195	12.4487	13.4807	11.6882	13.2101	12.8929	13.599	15.1261	14.7658	15.4896	14.1138	15.6765	14.1395	11.3446	14.0874	13.4381	12.8745	12.7286	13.3515	13.0852	15.3723	14.9579	14.4755	13.7919	14.3735
P02189	MB	MYG_PIG	Myoglobin	0.0061487	0.0512	-1.57785	14.5786	18.6092	16.96	16.9147	16.3832	17.0363	16.1723	14.0526	16.7838	16.5094	16.5677	18.3312	17.5	17.2219	17.1038	18.0464	16.3275	18.3458	15.4303	16.2163	13.8063	16.9123	17.1907	15.5225
I3LKV5	ADAMTS13	I3LKV5_PIG	ADAM metallopeptidase with thrombospondin type 1 motif 13	0.00681341	0.05619	-0.452439	16.9725	16.785	17.1111	16.9402	17.0157	17.0145	16.8426	17.0429	17.0724	16.6179	16.854	16.0092	16.5654	16.8719	16.7512	16.2719	16.8907	16.9181	16.1468	16.0529	16.0611	16.2162	16.3849	16.6926
A0A5G2R1B9;A0A5G2R6Y3;F1SI48	EPB42	A0A5G2R1B9_PIG;A0A5G2R6Y3_PIG;F1SI48_PIG	Erythrocyte membrane protein band 4.2	0.00699545	0.05715	-2.06765	10.7982	8.88267	11.6984	12.1476	10.0512	9.67766	9.98102	10.967	11.8242	11.2796	11.3833	12.775	12.362	10.9856	11.6733	15.8943	10.6296	10.0092	6.16168	10.3639	10.3877	9.7356	11.877	10.6222
F1SBS4	C3	F1SBS4_PIG	Complement C3	0.00750091	0.06071	0.229366	22.5691	22.6685	22.7848	22.751	22.6753	22.5644	22.6432	22.3612	22.7923	22.582	22.5937	22.7135	22.5601	22.9026	22.7697	22.8367	22.8157	22.6987	23.1933	22.9522	23.0203	22.7069	23.1418	22.9451
A0A287AXI8	FSTL3	A0A287AXI8_PIG	Follistatin like 3	0.00790915	0.06342	0.647211	14.5742	13.647	12.8658	12.4006	13.0502	13.477	14.5544	14.0884	14.7718	13.8149	14.544	14.27	13.0875	13.6835	13.0872	12.7921	12.9735	13.6607	13.8517	13.8695	14.1941	14.0264	13.2905	13.9357
A0A286ZQ31	BPGM	A0A286ZQ31_PIG	Phosphoglycerate mutase	0.00818697	0.06505	-0.932165	16.0088	14.9457	14.3852	15.2728	14.7248	14.7974	14.8359	15.3836	15.2041	14.7162	14.6335	14.0038	15.8213	16.4686	15.2842	16.5626	15.3001	15.5804	14.5424	14.8911	15.0467	14.3933	14.6101	15.9406
Q03472	APOR	APOR_PIG	Apolipoprotein R	0.0090822	0.0715	-1.62225	12.6598	13.7187	13.5683	12.6348	14.4428	13.1644	10.6497	14.2843	12.5797	12.6152	13.9306	12.6627	14.579	13.8706	14.1	14.0229	14.1172	13.4211	9.19054	12.3573	12.522	13.6616	13.0698	13.5761
A0A286ZSR6;A0A286ZU24;A0A287A0Q2;A0A287ACL1;F1RJF7	SDF4	A0A286ZSR6_PIG;A0A286ZU24_PIG;A0A287A0Q2_PIG;A0A287ACL1_PIG;F1RJF7_PIG	Stromal cell derived factor 4;Stromal cell derived factor 4;Stromal cell derived factor 4;45 kDa calcium-binding protein isoform 2;Stromal cell derived factor 4	0.00939932	0.07333	0.440114	14.7863	13.4333	13.9982	13.4555	14.0269	13.3122	14.7205	14.3964	13.9928	14.5648	14.5537	14.3311	12.4409	13.713	13.3439	13.0939	13.7416	13.9092	13.5503	13.0771	14.6697	13.6939	13.5253	14.3668
F1S0J2	C4BPA	F1S0J2_PIG	Uncharacterized protein	0.010062	0.0778	0.319611	17.5549	18.2169	17.8931	17.9978	17.9639	18.1573	17.7893	17.8958	18.0331	17.7414	17.3426	17.7242	17.5847	18.2422	17.7225	17.8349	17.8207	17.9519	18.0768	18.2418	18.1629	18.0923	18.2531	18.2477
A0A286ZVC4;A0A287BQK7;F1SLX4	PTPRZ1	A0A286ZVC4_PIG;A0A287BQK7_PIG;F1SLX4_PIG	Protein tyrosine phosphatase receptor type Z1	0.0103614	0.07875	-0.434049	14.5022	14.9366	14.5406	14.979	13.9182	14.9333	14.0632	14.3708	15.1634	13.7371	14.2538	14.9573	14.8559	15.0533	14.4373	14.0036	14.3032	14.132	14.1432	13.7786	14.2721	13.9943	13.5755	14.4173
A0A287B1U6;A0A5G2QRA1;F1SGY4	NELL2	A0A287B1U6_PIG;A0A5G2QRA1_PIG;F1SGY4_PIG	Neural EGFL like 2	0.0104553	0.07875	-0.20798	17.7188	17.6468	17.6961	17.74	17.6175	17.8155	17.4682	17.3171	17.6939	17.5717	17.1649	17.6149	17.3932	17.6631	17.5871	17.427	17.6309	17.4134	17.3854	17.1279	17.3193	17.3981	17.2526	17.3837
F1S798;I3LJX8	ESAM	F1S798_PIG;I3LJX8_PIG	Endothelial cell adhesion molecule	0.0104571	0.07875	0.959662	17.3251	16.4306	16.3676	16.682	15.5284	17.5221	16.0633	16.1222	16.3349	16.3608	15.7901	16.9802	15.1407	16.1756	15.6567	14.9337	16.9965	16.5502	17.0431	16.3463	17.1083	16.5364	17.1448	17.0325
A0A286ZYQ4	LCP1	A0A286ZYQ4_PIG	Lymphocyte cytosolic protein 1	0.0112663	0.08411	0.672416	14.48	15.3734	14.6827	15.1144	14.889	15.4457	15.9984	17.3186	16.6346	15.8857	16.3836	15.7809	15.0423	14.4144	15.3446	15.1757	15.1681	14.9843	15.376	16.0391	15.5155	15.7115	15.9311	15.5908
A0A5G2QUQ4;Q6YT39	LTF	A0A5G2QUQ4_PIG;Q6YT39_PIG	Lactotransferrin	0.0116359	0.08613	0.625026	17.3946	17.0186	17.3018	17.2442	17.0959	16.6367	17.5608	16.8726	17.7302	17.128	18.1905	17.3398	16.5279	17.8894	16.7024	16.2615	15.6393	16.631	17.2144	17.3842	17.9936	16.6528	17.3034	16.8532
A0A287AU22;A0A287B8K4	PLVAP	A0A287AU22_PIG;A0A287B8K4_PIG	Plasmalemma vesicle associated protein	0.012116	0.08892	-0.529832	13.9704	13.6862	13.9741	14.2	13.706	13.227	14.5477	14.7781	14.9189	14.3345	15.0729	14.2962	14.2048	13.9379	14.4471	14.0131	14.1432	14.4451	13.6527	13.2119	13.6104	14.4993	13.634	13.4041
I3LKI1	SRGN	I3LKI1_PIG	Serglycin	0.0123902	0.09017	-1.47748	14.874	14.3513	14.8044	12.8801	14.1297	14.6118	15.1122	13.9744	15.0338	15.5076	13.8914	13.9585	14.0748	13.8197	15.5135	13.7002	14.7096	14.7995	12.4879	13.3989	10.4273	13.1124	14.0296	14.2963
F1SJ86	CSPG4	F1SJ86_PIG	Chondroitin sulfate proteoglycan 4	0.0135816	0.09742	-0.558146	14.789	14.8823	14.0866	14.9557	14.4095	14.6338	14.6364	14.4248	14.7491	13.572	14.8382	14.4157	14.9885	15.0677	14.4009	13.8758	14.6837	14.6218	14.2784	14.1589	13.8935	14.0151	14.0039	13.9397
A0A287A6K7	APMAP	A0A287A6K7_PIG	Adipocyte plasma membrane associated protein	0.0136125	0.09742	0.630812	17.8276	17.9914	18.0807	17.9597	17.6676	17.7419	17.833	17.6049	17.6263	17.8031	17.4823	17.1253	16.1281	17.0714	17.8117	16.9667	17.8846	16.6896	17.6321	17.9538	17.3403	17.9	17.8595	17.6512
A0A5G2QSL2;I3LJ52	CTRB2	A0A5G2QSL2_PIG;I3LJ52_PIG	Peptidase S1 domain-containing protein	0.0139029	0.09869	0.693757	12.3531	11.9939	13.2951	12.3994	13.6739	11.6505	13.0036	13.7414	13.224	13.5805	14.2592	11.8474	10.6762	11.744	10.8012	11.2219	10.8331	11.4257	12.2924	12.1047	11.3603	12.0172	11.9208	11.1692
O11780	TGFBI	BGH3_PIG	Transforming growth factor-beta-induced protein ig-h3	0.0141166	0.09939	-0.80102	18.9657	19.1558	18.8097	18.9796	19.264	19.2779	18.4924	18.2214	18.3878	17.7602	19.3933	17.5874	19.2468	18.9513	18.9774	18.3257	18.3695	19.811	18.9586	18.2672	17.9999	17.9745	17.5563	18.1191

## Sheet: 22h_HIGH_SE - HIGH_CON  
Accession ID	Gene ID	Protein Name	Protein Description	rawP	adjp	log2FC	HIGH_CON	HIGH_CON	HIGH_CON	HIGH_CON	HIGH_CON	HIGH_CON	HIGH_SE	HIGH_SE	HIGH_SE	HIGH_SE	HIGH_SE	HIGH_SE	LOW_CON	LOW_CON	LOW_CON	LOW_CON	LOW_CON	LOW_CON	LOW_SE	LOW_SE	LOW_SE	LOW_SE	LOW_SE	LOW_SE
P04366	AMBP	AMBP_PIG	Protein AMBP (Fragment)	6.91491e-12	0	-0.580157	22.8883	22.3244	22.9473	22.7041	22.8905	22.4782	22.1205	22.3235	21.8885	22.4719	22.1518	21.7958	22.9862	22.899	23.084	22.6217	22.9076	22.9285	22.5854	22.4262	22.2289	22.3282	22.2096	22.5362
A0A480P2B4	SERPINA5	A0A480P2B4_PIG	Plasma serine protease inhibitor preproprotein	1.0458e-09	0	-0.704088	19.3658	18.7912	19.4915	19.1401	19.3926	19.111	18.7987	18.2103	18.509	18.5516	18.6563	18.3418	19.6354	19.7371	20.1038	20.0249	20.0325	19.9406	19.6553	19.0562	19.3293	19.3143	19.6687	19.5626
F1SL22	VWF	F1SL22_PIG	von Willebrand factor	2.55007e-08	0	1.34528	19.797	19.1447	18.2221	18.9416	18.6047	19.2555	19.7504	20.3199	20.7325	19.571	20.2296	21.4339	18.7035	19.2223	18.7783	18.8361	18.8272	18.5596	18.9033	20.0655	19.9372	20.4723	20.2729	20.8297
A0A5G2QKI1;Q8MJ39	MGP	A0A5G2QKI1_PIG;MGP_PIG	Matrix Gla protein	4.22865e-10	0	2.28335	18.0879	18.2191	18.1102	18.0763	18.3383	18.8544	20.5477	20.2719	20.382	20.3879	20.6279	21.1689	17.6393	17.7497	17.6259	17.2914	17.2444	16.9487	18.8893	20.3247	17.422	20.2412	18.2399	18.2235
A0A287BEY3	LOC100624077	A0A287BEY3_PIG	Endogenous retrovirus group V member 2 Env polyprotein	0	0	-1.70649	17.569	18.0536	17.5035	17.9948	17.552	18.0896	15.7344	16.4351	15.6913	16.7007	16.1237	15.8384	18.2672	17.5405	18.0826	17.822	17.4232	17.8386	16.9961	16.8391	17.2066	16.0224	16.8577	17.1196
F1S567	VCAM1	F1S567_PIG	Uncharacterized protein	3.89661e-09	0	1.07852	16.936	16.8431	16.6842	15.9185	16.6564	16.7624	17.9436	17.3397	17.3901	17.818	17.9125	17.8678	16.6736	15.8429	16.6635	16.426	16.6492	16.3722	17.185	17.14	16.8837	17.694	16.563	16.8851
F1RWV2;P35624	TIMP1	F1RWV2_PIG;TIMP1_PIG	Metalloproteinase inhibitor 1	5.4623e-14	0	2.08347	16.0472	15.9763	16.183	16.2583	16.008	16.658	18.1259	18.6786	18.0149	18.1931	18.6138	18.0054	15.7021	15.3427	15.9278	15.5855	15.365	15.8253	16.6456	17.8497	16.4435	18.8275	17.3889	16.4225
A0A287BPW3;P32196	LOC102159373;NPG3	A0A287BPW3_PIG;PG3_PIG	Uncharacterized protein;Protegrin-3	9.28009e-10	0	4.89496	13.8009	15.1419	14.6358	14.7634	14.416	15.7438	18.7828	20.6501	18.3202	18.6587	21.2124	20.2473	14.0707	13.3476	15.1753	14.2816	16.4694	13.7225	18.1171	19.0453	16.0666	20.8609	15.007	16.5803
O18831	MSTN	GDF8_PIG	Growth/differentiation factor 8	3.63003e-10	0	-1.08576	14.6167	15.0634	15.4428	15.5123	15.7885	14.2654	14.3677	14.7496	13.5911	14.109	14.288	13.0691	14.0565	13.3295	14.7228	14.6816	14.5119	15.0777	14.3117	13.7904	14.0717	14.4054	14.8888	14.7667
A0A287AE47;A0A287B310	STOM	A0A287AE47_PIG;A0A287B310_PIG	Stomatin	4.12901e-08	0	1.65435	13.1813	13.9008	13.4626	13.7685	13.1194	14.461	14.5351	14.798	16.1288	14.6526	15.8287	15.8764	15.0475	12.9446	13.1444	13.6135	13.5982	13.2504	13.2641	13.8399	13.6352	15.4472	13.2982	14.0383
F1S6S9	PRTN3	F1S6S9_PIG	Proteinase 3	0	0	3.05642	12.5962	13.228	13.3775	13.3364	13.3504	12.9501	15.6007	16.3359	16.3542	15.5551	16.3428	16.9884	11.6753	11.8123	12.8105	12.9668	13.9152	11.5924	15.3552	15.8075	15.1951	16.0346	14.231	15.745
P51525	NA	PF12_PIG	Prophenin-2	6.2387e-08	0	4.53168	13.2401	13.3617	12.9181	11.8952	12.4224	12.8542	16.4693	18.6137	15.1817	16.3751	19.9371	17.3049	12.1132	11.6886	13.0291	12.7601	13.7655	12.1935	13.8819	15.1129	12.7528	19.2037	12.8846	14.2763
A0A5G2QJT3;F1RHA9	LECT2	A0A5G2QJT3_PIG;F1RHA9_PIG	Leukocyte cell-derived chemotaxin-2;Leukocyte cell derived chemotaxin 2	0	0	-1.87929	12.1896	11.205	11.9105	12.0891	12.0961	12.1443	9.8826	10.3055	10.2416	9.42327	10.1595	10.3463	12.6388	12.3843	12.5255	12.1568	11.8757	11.8838	11.4244	11.4916	11.4555	11.1807	10.1742	12.0062
A0A287BPH0;P00998	SPINK1	A0A287BPH0_PIG;ISK1_PIG	Serine protease inhibitor Kazal-type 1	4.57263e-08	0	1.93124	10.2259	10.2356	11.2236	10.2983	11.0461	11.3757	12.6808	13.6772	11.8748	12.1247	13.2467	12.3885	11.4952	11.4821	11.6726	10.843	10.0678	9.94389	11.8097	12.4526	12.301	12.4316	10.936	11.788
A0A286ZJ21;A0A287ADL0;I3LEW0	COLEC11	A0A286ZJ21_PIG;A0A287ADL0_PIG;I3LEW0_PIG	Collectin subfamily member 11	1.89641e-07	1e-05	-0.634724	17.1541	16.9293	16.7553	16.7694	17.0123	17.0413	16.4735	15.9333	16.6016	16.4862	16.2398	16.119	16.748	16.7502	16.3517	16.3469	16.516	16.3229	15.7745	16.0177	16.122	16.1454	16.584	15.9797
F1SS26	THBS1	F1SS26_PIG	Uncharacterized protein	2.72808e-07	1e-05	1.8746	15.9785	15.7888	15.5747	15.8876	15.6048	16.8948	17.7449	18.4735	18.0466	16.2387	18.7253	17.7477	16.0324	15.6661	16.2473	15.8801	16.1795	15.8103	16.3155	16.9267	16.6686	18.2458	16.2552	16.0539
F1SJM0	PTX3	F1SJM0_PIG	Pentraxin-3	1.53934e-07	1e-05	2.27125	14.2383	14.9738	14.4679	15.0471	14.0792	14.0119	16.1494	17.9095	17.0323	16.5599	17.3175	15.4772	14.2009	13.4798	13.7697	13.8231	14.8002	13.9414	14.3088	16.28	14.5995	16.3473	13.1976	14.7801
Q6QR67	RETN	Q6QR67_PIG	Resistin	1.34569e-07	1e-05	4.41197	14.1601	12.2087	12.6351	11.9761	12.8259	13.5987	16.8769	18.0129	15.8497	16.2309	18.6232	18.2828	11.4168	14.347	12.0089	11.7818	12.9213	13.6265	15.056	16.3517	12.6535	17.8932	10.8573	12.7704
A0A287BPE2	CSF1	A0A287BPE2_PIG	Colony stimulating factor 1	1.12586e-07	1e-05	1.57253	12.6326	13.3523	13.4426	13.5351	13.2885	13.0992	14.7989	14.8007	14.5914	14.5429	15.3871	14.6642	13.4002	12.4596	12.82	12.5651	12.848	12.7576	13.7351	13.6993	16.2094	13.7835	14.3168	14.0121
A0A286ZI97	PGLYRP1	A0A286ZI97_PIG	Peptidoglycan-recognition protein	8.74462e-08	1e-05	2.71108	13.8988	12.5857	11.8423	12.5681	11.5913	11.9945	14.6481	15.7706	14.0168	14.0015	16.5907	15.7196	11.6798	11.7773	12.5832	11.1807	11.9585	11.2686	13.3421	14.0607	13.6798	15.9352	13.5035	12.5049
A0A287B3S3	ITIH1	A0A287B3S3_PIG	Inter-alpha-trypsin inhibitor heavy chain H1	5.05293e-07	2e-05	-0.724307	20.8436	21.0854	21.162	21.0801	21.2364	20.1883	20.4917	19.9887	20.066	20.3248	19.9477	20.431	21.0691	21.4611	21.5589	21.07	21.1869	21.2518	21.1221	21.0216	20.8373	20.5161	20.8898	21.1219
A0A287AKL0;F1S9C0;F6Q5X1;P0DSO0	;SAA3;;SAA2	A0A287AKL0_PIG;F1S9C0_PIG;F6Q5X1_PIG;SAA2_PIG	Serum amyloid A protein;Serum amyloid A protein;Serum amyloid A protein;Serum amyloid A-2 protein	5.49818e-07	2e-05	5.05168	16.8445	12.8521	12.3944	15.1707	13.4153	14.1168	19.3011	18.1913	19.0444	21.2225	17.5244	19.8202	14.6466	13.4669	12.7015	15.0277	14.6523	14.5131	21.7158	21.5631	16.2545	19.7773	14.8233	17.3081
O02668	ITIH2	ITIH2_PIG	Inter-alpha-trypsin inhibitor heavy chain H2	8.75246e-07	3e-05	-0.922073	21.5431	21.7292	22.2427	21.8941	22.0211	21.1403	21.105	20.6256	20.8051	21.0314	20.5421	20.929	21.6732	22.0211	22.3984	21.5426	21.6059	21.7592	21.4938	21.5922	22.2658	21.0991	21.985	22.2271
P14287	SPP1	OSTP_PIG	Osteopontin	7.34458e-07	3e-05	1.09543	18.7862	18.3832	17.9418	18.3087	18.3458	18.7767	19.6155	19.9358	18.9418	19.3118	19.9695	19.3404	18.2724	18.1001	18.4244	17.9054	18.0279	17.8299	18.7175	19.2769	18.0452	17.6277	18.1378	17.9657
A0A287B7B9;A0A287BEM9;A0A5G2QVI0;A0A5S6FYV9;A0A5S6I1G3;Q07717	B2M	A0A287B7B9_PIG;A0A287BEM9_PIG;A0A5G2QVI0_PIG;A0A5S6FYV9_PIG;A0A5S6I1G3_PIG;B2MG_PIG	Beta-2-microglobulin	7.96803e-07	3e-05	2.02267	15.6547	15.233	14.8181	15.7823	14.9813	16.5687	18.0024	17.5359	16.4096	17.3847	18.028	17.8136	15.302	15.0145	15.4581	14.5036	14.9381	14.8242	17.219	18.0302	16.1897	17.6565	15.0478	16.0159
F6Q697;K7GME6	S100A9	F6Q697_PIG;K7GME6_PIG	EF-hand domain-containing protein	6.59155e-07	3e-05	1.72258	13.0406	13.2895	12.7871	11.0098	12.6041	13.3161	14.2299	13.886	14.8008	13.7495	15.0594	14.6571	12.3283	12.4692	13.3195	11.7875	12.2162	11.9951	14.5103	13.4549	13.8055	14.8732	13.8651	14.0486
F1SFI5	HRG	F1SFI5_PIG	Uncharacterized protein	2.46666e-06	8e-05	-1.105	24.9513	24.9508	25.177	24.7297	25.1474	24.9762	24.0223	23.1208	24.2266	24.4671	23.3145	24.1509	24.5643	24.6414	24.9428	24.0696	24.7101	24.7432	24.4973	24.3712	23.8845	23.1563	23.2737	23.7965
F1SRC8	CLEC3B	F1SRC8_PIG	C-type lectin domain family 3 member B	4.56952e-06	0.00014	-0.549956	22.6036	22.6765	22.545	22.5307	22.6114	22.3007	22.0683	21.8763	22.3016	21.8525	21.6899	22.1795	22.9967	22.2901	22.1294	22.4302	22.5509	22.499	22.3984	21.8814	21.5843	22.0026	21.7107	22.0574
A0A287B863;F1SKR0	ACAN	A0A287B863_PIG;F1SKR0_PIG	Aggrecan core protein	7.44105e-06	0.00023	1.38106	16.3436	17.3231	16.6851	16.9003	16.8291	16.2599	17.6217	18.4303	19.1931	16.8573	18.9028	17.6224	17.1577	16.3289	16.5352	16.4927	16.5839	16.1883	16.6097	16.8858	17.1202	17.9371	16.9202	17.1388
A0A286ZR66;A0A286ZVK1	F11	A0A286ZR66_PIG;A0A286ZVK1_PIG	Coagulation factor XI	1.32401e-05	0.00039	2.60903	15.2418	13.3376	15.4845	15.0746	15.4632	16.3951	17.1196	17.7832	18.2143	18.0508	17.0804	18.4027	17.4434	16.2299	15.484	17.0133	17.2393	16.8373	20.6799	19.8052	17.2597	18.7196	16.6064	17.2427
A0A287BCT9;A0A287BJ87	EXTL2	A0A287BCT9_PIG;A0A287BJ87_PIG	Exostosin like glycosyltransferase 2	1.66551e-05	0.00047	-0.562667	18.1519	18.4582	18.137	18.5223	18.2952	18.0866	17.9781	17.5038	17.8086	17.478	17.6115	17.8951	18.0996	17.7954	17.7755	17.7908	18.0361	18.0213	17.9022	17.7851	18.5174	17.8944	18.1691	18.4659
A0A287BBJ9	PCSK9	A0A287BBJ9_PIG	Proprotein convertase subtilisin/kexin type 9	1.71063e-05	0.00047	-1.44709	16.617	14.7387	16.3606	15.9553	15.6744	16.3012	14.6737	13.8418	14.3331	14.7374	14.602	14.7766	16.2905	16.1426	16.7979	17.1276	16.9632	16.0629	15.6066	15.2633	16.0587	13.9852	15.4787	16.4573
F1SCC7	LOC396684	F1SCC7_PIG	SERPIN domain-containing protein	2.19703e-05	0.00059	1.83877	20.5815	20.2234	20.6266	20.0563	20.6064	21.0539	22.4835	21.6255	21.7882	23.1291	22.0274	23.1271	20.7358	20.8473	20.1011	20.8716	21.4744	20.4282	23.9196	23.5622	21.2025	22.9371	21.187	21.2395
A0A286ZYP5;A0A287AAB2;A0A287AEH7;A0A287AFM5;A0A287AJS8;A0A287AQG3;A0A287B220;A0A287BBX0;F1S1N1;K7GLN3	SLA-2;SLA-11;SLA-2;SLA-2;SLA-2;SLA-2;SLA-2;SLA-2;SLA-2;	A0A286ZYP5_PIG;A0A287AAB2_PIG;A0A287AEH7_PIG;A0A287AFM5_PIG;A0A287AJS8_PIG;A0A287AQG3_PIG;A0A287B220_PIG;A0A287BBX0_PIG;F1S1N1_PIG;K7GLN3_PIG	Ig-like domain-containing protein;Histocompatibility antigen, class I;Ig-like domain-containing protein;Ig-like domain-containing protein;Ig-like domain-containing protein;Ig-like domain-containing protein;Ig-like domain-containing protein;Ig-like domain-containing protein;Ig-like domain-containing protein;Ig-like domain-containing protein	2.40242e-05	0.00062	1.93146	12.6126	12.5621	12.5405	12.65	12.7752	13.9575	14.4565	15.5207	14.8275	13.9632	15.551	14.3675	12.8702	12.5255	12.3569	12.0981	11.5316	11.4407	14.3045	15.0393	13.1136	15.8693	14.219	12.4482
A0A287BKG2;F1S7U3	CHI3L1	A0A287BKG2_PIG;F1S7U3_PIG	Chitinase-3-like protein 1	2.52278e-05	0.00064	2.90358	13.4741	12.9308	12.8844	14.0107	14.2799	14.0247	16.6486	16.8485	16.1257	15.7248	17.2776	16.4008	14.1827	14.5576	14.4967	12.676	13.7182	13.6779	15.0866	16.7352	13.0259	17.5511	12.4225	12.9485
F1SU75	OIT3	F1SU75_PIG	Oncoprotein induced transcript 3	4.18763e-05	0.00102	-1.57143	16.0755	15.7068	14.9074	15.4658	15.3612	15.1843	14.4437	14.0736	14.2218	13.658	13.2599	13.6154	14.353	14.2316	15.3518	14.8461	14.9288	14.9388	14.1207	12.7849	15.1395	13.5635	15.9347	14.8853
Q9N178	COL10A1	Q9N178_PIG	Type X collagen	4.72907e-05	0.00113	-2.39821	14.3375	14.9623	14.8645	14.9058	14.8417	14.0571	13.5344	11.9159	12.3257	13.2597	12.7263	9.8176	15.3698	14.4255	14.4623	14.192	14.3947	14.7392	14.5465	13.4773	15.1176	11.8126	16.0939	14.5052
F1RWA3;G9K122;K7GPB4	MRC1	F1RWA3_PIG;G9K122_PIG;K7GPB4_PIG	Uncharacterized protein;Macrophage mannose receptor 1;Uncharacterized protein	5.7774e-05	0.00134	1.08337	15.9543	16.0009	15.591	16.013	15.6943	16.5982	16.1273	17.8703	17.0528	16.8637	17.2555	17.1823	15.7658	15.1286	15.3003	15.4804	15.4888	15.1126	15.9148	16.4864	15.7898	17.097	15.3112	15.8416
A0A480K168;F8S329	NA	A0A480K168_PIG;F8S329_PIG	Endogenous retrovirus group S71 member 1 Env polyprotein-like;Env protein	6.21172e-05	0.0014	1.23951	14.186	13.486	13.4909	13.941	13.6696	13.8801	14.8776	15.103	15.4942	14.7183	15.5156	14.382	11.8093	13.3635	13.1397	13.2262	12.6455	13.2664	12.3921	13.4282	14.337	14.6279	13.1551	13.7452
A0A480KNV0;A0A5G2QFI9;Q2HXZ9	SAA3	A0A480KNV0_PIG;A0A5G2QFI9_PIG;Q2HXZ9_PIG	Serum amyloid A protein	7.22998e-05	0.00159	5.71199	14.5104	15.3623	15.7216	10.8479	11.0922	8.87442	18.2024	18.2988	18.0968	18.723	18.7085	18.6512	11.1042	8.697	15.7506	16.3996	14.7787	15.6732	17.9359	19.1221	15.8604	18.7422	12.4538	14.4625
A0A287AU27	DSPP	A0A287AU27_PIG	Uncharacterized protein	8.65122e-05	0.00186	1.4798	14.4709	14.3736	15.1565	14.6328	14.9562	15.3671	15.7292	16.8797	15.583	16.066	16.7216	16.8564	15.6457	14.263	14.449	13.1221	14.6779	13.8479	15.3032	15.4152	15.8308	15.2964	13.7973	15.0657
K7GP14;P31936	IBSP	K7GP14_PIG;SIAL_PIG	Bone sialoprotein 2	9.21194e-05	0.00193	2.17374	14.1395	13.815	13.431	14.1666	15.7497	14.1929	16.5303	17.6609	16.519	15.924	17.0634	14.8396	14.4891	14.1947	13.9854	13.5794	13.5177	13.3386	14.1649	14.9538	13.9099	13.4556	13.3852	10.7743
B9UJD6	C1QTNF3	B9UJD6_PIG	C1q and tumor necrosis factor related protein 3 isoform b	9.55706e-05	0.00196	-0.854292	16.9226	17.0433	16.8285	16.8775	16.8996	15.9243	16.1094	15.5094	15.9319	16.3187	15.9694	15.5313	16.8878	16.609	16.4372	16.6351	16.7038	17.18	16.6648	16.178	16.0852	15.5578	16.2452	16.3974
F1SQ01	PRDX4	F1SQ01_PIG	Peroxiredoxin	0.000112852	0.00226	1.66457	13.0953	13.473	12.8713	12.6902	12.5728	13.9864	13.9109	16.3175	14.9006	14.1028	15.2226	14.2219	12.7906	13.1017	13.5943	13.0392	12.8442	13.2426	12.9863	13.3563	12.534	15.3969	13.7263	13.7121
A0A286ZTE6;A0A287B2N2;A0A288CFW6;A0A288CFW8;P79307	APP	A0A286ZTE6_PIG;A0A287B2N2_PIG;A0A288CFW6_PIG;A0A288CFW8_PIG;A4_PIG	Amyloid-beta A4 protein	0.000115711	0.00227	2.53956	9.47934	10.6721	11.6444	11.1572	11.7983	10.8828	12.2147	14.3294	11.7394	12.5006	14.1395	15.9479	10.9285	11.5891	10.7636	10.0564	8.18603	11.6362	9.79196	11.1787	10.7346	11.81	10.7846	11.5143
A0A287BKI9	B3GNT7	A0A287BKI9_PIG	Hexosyltransferase	0.000121198	0.00232	0.669406	15.0832	14.5056	14.8343	14.2234	14.6047	14.648	15.446	14.552	15.2548	15.5867	15.5327	15.5436	14.627	15.3209	15.2564	14.6045	14.6941	15.1016	14.8038	15.0572	15.947	15.4068	15.3417	15.6851
A0A5G2QW05;F1SKB1;K7GKN3;K7GMZ8	CP	A0A5G2QW05_PIG;F1SKB1_PIG;K7GKN3_PIG;K7GMZ8_PIG	Ceruloplasmin	0.000125899	0.00236	2.94192	13.1503	14.0559	13.0576	13.5148	14.5177	15.0592	17.2837	15.9925	16.0806	17.8024	15.9727	17.8752	13.6772	13.0869	13.7544	13.1445	15.3966	13.4978	17.7389	17.2422	12.1993	17.1935	13.6827	13.5324
B8YGC1	REG3G	B8YGC1_PIG	Regenerating islet-derived family member 3 isoform 2	0.000150374	0.00276	4.46001	12.1176	11.1264	10.5201	13.3644	12.6514	12.6721	15.2706	17.298	15.7109	16.8652	16.819	17.2482	12.991	13.1323	11.9044	10.6378	12.1588	9.22103	13.0244	18.4927	11.3745	17.1007	10.728	10.0723
F1SFI4	KNG1	F1SFI4_PIG	Kininogen 1	0.000161878	0.00288	-0.576371	17.6507	17.8029	17.6266	17.7094	17.8662	17.8387	17.3011	16.6978	17.1829	17.6099	16.8609	17.3837	17.6341	17.6932	16.9121	17.5325	17.5493	17.518	17.5085	17.0214	17.6802	17.2127	17.2515	16.9684
A0A286ZVT6;A0A287AHD5;A0A5G2RF91;F1RIP6	NUCB1	A0A286ZVT6_PIG;A0A287AHD5_PIG;A0A5G2RF91_PIG;F1RIP6_PIG	Nucleobindin 1	0.000163708	0.00288	2.25191	14.7209	14.7132	13.9151	14.5555	14.3521	14.9343	16.7119	18.2397	16.4511	14.8749	18.0066	16.4185	15.345	14.3349	13.8958	14.0403	13.7891	14.3721	14.4334	14.6846	12.6581	17.3371	14.7415	14.5231
A0A286ZIL9;A0A5G2R4W0	COL18A1	A0A286ZIL9_PIG;A0A5G2R4W0_PIG	Collagen type XVIII alpha 1 chain	0.000213493	0.00369	0.8802	16.1692	15.6022	15.7026	15.8393	15.4669	16.0855	16.4948	16.9422	16.4812	16.1373	17.3861	16.7053	15.5279	15.9973	15.7151	15.9713	15.5071	15.665	15.6066	15.9835	15.3449	16.9619	15.6793	15.3722
P20305	GSN	GELS_PIG	Gelsolin (Fragment)	0.000229896	0.00389	-0.319123	22.0383	21.9904	22.408	22.014	22.054	22.2954	21.9345	21.7498	21.8432	21.8304	21.959	21.5683	22.694	22.5293	23.3048	23.0342	22.5248	22.8271	22.3632	22.0755	22.4746	22.341	22.4339	22.2611
A0A5G2QE07;A0A5G2QFK8;A0A5G2R7M4;F6Q8W1;K7GRV5	LGALS3	A0A5G2QE07_PIG;A0A5G2QFK8_PIG;A0A5G2R7M4_PIG;F6Q8W1_PIG;K7GRV5_PIG	Galectin	0.000245039	0.00407	-0.955383	13.3693	14.2402	14.6793	14.4836	13.5421	13.7352	12.9397	13.4316	12.5308	13.0679	14.1535	12.1938	13.1346	13.1346	14.1973	13.4788	13.1221	14.5295	13.8213	12.4194	13.6985	13.0817	13.3665	12.9745
A0A287AAH4;A0A5G2R543;B8XH67;F6PYE5	SLC9A3R1	A0A287AAH4_PIG;A0A5G2R543_PIG;B8XH67_PIG;F6PYE5_PIG	Na(+)/H(+) exchange regulatory cofactor NHE-RF	0.000271786	0.00443	2.46712	14.3667	11.9137	10.1704	11.1511	12.0086	15.1471	15.0242	14.7027	14.3731	15.3299	14.5912	15.5393	10.977	11.0427	11.7443	11.5979	11.3475	11.4814	15.5073	15.0461	12.391	15.2551	13.409	14.068
A0A5G2QF97;A0A5G2QVW3;A0A5S6GJ84;O02837	CSF3	A0A5G2QF97_PIG;A0A5G2QVW3_PIG;A0A5S6GJ84_PIG;CSF3_PIG	Granulocyte colony-stimulating factor	0.000296912	0.00476	4.92529	11.2763	12.0991	9.40401	10.5033	0	12.3144	12.6267	14.3345	15.8123	12.4269	14.9443	15.004	13.1948	10.1927	12.3315	11.1338	10.0948	0	12.0932	11.1441	10.6257	13.8279	11.1551	11.2541
A0A286ZVN0	LOC106504547	A0A286ZVN0_PIG	SERPIN domain-containing protein	0.000357116	0.00562	3.62861	16.3811	16.531	16.4967	17.3966	17.162	19.1245	21.3222	20.6337	18.9549	21.5648	20.2205	22.1676	16.7881	18.3623	14.929	17.6508	17.9439	16.4128	22.8162	22.113	17.5603	21.8123	16.5236	16.6913
A0A5G2QN51;I3LC80	SEMA7A	A0A5G2QN51_PIG;I3LC80_PIG	Semaphorin 7A (John Milton Hagen blood group)	0.000431171	0.00666	0.789164	15.2686	14.9056	14.5467	14.9728	14.9057	15.4806	15.2774	15.8563	16.2352	15.5908	16.3139	15.5414	14.2579	15.0406	14.5163	14.2299	14.3554	14.2612	13.921	14.7314	14.9512	15.2888	15.3629	14.9618
I3LVL5	CRISP3	I3LVL5_PIG	Cysteine rich secretory protein 3	0.00048141	0.00719	0.791084	16.7433	17.6442	17.2137	17.4554	17.3238	16.7789	18.213	17.7356	17.8949	17.6776	18.0412	18.3435	16.9992	16.7641	17.0652	16.5758	16.8521	17.1266	17.3567	17.4265	18.7739	18.0477	17.2873	17.7297
A0A287ATV4;A0A287B4G4;A0A5G2QQK3;A0A5G2R1K1;A0A5G2R6S0;I3LKU0	RAC3;RAC1;RAC1;RAC2;RAC2;RAC2	A0A287ATV4_PIG;A0A287B4G4_PIG;A0A5G2QQK3_PIG;A0A5G2R1K1_PIG;A0A5G2R6S0_PIG;I3LKU0_PIG	Rac family small GTPase 3;Rac family small GTPase 1;Rac family small GTPase 1;Rac family small GTPase 2;Rac family small GTPase 2;Rac family small GTPase 2	0.000478345	0.00719	2.09502	13.3479	13.7126	13.9054	13.7354	10.7067	15.8319	15.1487	16.1125	16.1277	14.6664	16.2515	15.5032	14.1961	13.5108	13.3827	13.6764	14.1218	14.0265	13.1593	14.3024	13.1958	16.2814	14.6662	13.3013
A0A5G2QN91	LOC100158011	A0A5G2QN91_PIG	BPTI/Kunitz inhibitor domain-containing protein	0.000497019	0.0073	1.72107	15.3542	14.8901	15.253	14.0952	15.3328	15.0308	16.5269	17.7128	16.4949	15.3087	17.6739	16.5653	13.397	13.9121	15.1422	14.5804	14.865	14.6544	14.3902	15.3078	16.6552	17.0266	14.2293	15.8406
Q69DK8	NA	C1S_PIG	Complement C1s subcomponent	0.000588492	0.0085	1.36798	17.8068	18.1098	17.589	18.3034	17.8548	17.9871	19.2148	19.4101	18.5758	19.753	19.1756	19.7294	18.1116	17.4264	17.4861	17.8164	18.1098	18.2102	20.1106	20.124	17.7828	19.0664	17.5439	17.516
A0A286ZIU5;A0A287ARJ8;F1SCC6	SERPINA3-2	A0A286ZIU5_PIG;A0A287ARJ8_PIG;F1SCC6_PIG	SERPIN domain-containing protein	0.000651976	0.00926	3.07707	17.6429	17.3398	19.3544	17.5291	19.1679	18.8578	21.8918	21.2456	19.7264	22.353	21.0429	22.0946	17.7623	18.3429	17.3745	19.0725	18.2592	19.0803	23.1338	22.6897	17.7892	22.1743	17.7998	17.3758
K7GN89	IL18BP	K7GN89_PIG	Interleukin 18 binding protein	0.000763821	0.01068	6.03484	12.5445	12.5771	0	11.9747	11.9089	12.6335	16.5021	16.2551	15.9021	15.8246	17.285	16.0789	11.2428	12.5486	13.3215	13.0713	11.4408	7.61148	12.9741	16.1124	10.3166	16.7144	10.7108	10.8229
P49930	PMAP23	PMP23_PIG	Antibacterial peptide PMAP-23	0.00085202	0.01173	5.4509	10.8324	12.0962	7.11961	9.80279	8.45935	8.58965	13.8881	15.8737	14.1036	13.2473	16.8905	15.6022	8.71016	11.9094	10.2083	10.8364	0	9.70442	13.4193	13.8707	9.19964	16.7611	10.2608	9.60407
E9KYT3;P24854	IGFBP4	E9KYT3_PIG;IBP4_PIG	Insulin-like growth factor-binding protein 4	0.000922176	0.0125	0.956104	15.088	14.6734	14.8196	14.9943	14.8677	15.6149	15.6252	16.5331	15.4177	15.9401	16.2888	15.9896	15.0081	14.8723	15.2026	14.7559	14.9966	14.6111	15.8612	16.5172	15.1252	16.3196	14.9282	16.8985
F1SNU4	LOC100736951	F1SNU4_PIG	Uncharacterized protein	0.000976319	0.01303	3.00458	9.76214	10.554	12.4639	15.1286	11.3411	14.4801	14.4652	16.4234	14.9475	13.2485	16.8434	15.8291	13.8333	13.1275	12.5599	12.8956	11.1787	11.8029	12.6868	13.8502	12.6711	16.438	11.4207	12.8013
P12067;P12068;P12069	NA	LYSC1_PIG;LYSC2_PIG;LYSC3_PIG	Lysozyme C-1;Lysozyme C-2;Lysozyme C-3	0.00100245	0.01318	1.73148	11.8123	13.188	13.2926	12.1218	13.0961	12.4249	13.3096	15.1785	13.6723	14.1627	15.2546	14.7468	13.2594	12.1512	13.4649	11.9381	12.9798	13.4285	13.9115	15.1654	12.3896	15.2993	13.747	13.0647
F6PSJ3	APOC2	F6PSJ3_PIG	Uncharacterized protein	0.00104593	0.01335	-0.759143	18.7806	17.4543	18.7707	18.2571	18.4467	18.8237	17.3202	17.8012	17.9688	17.5238	18.2053	17.159	20.7015	20.4864	20.8164	20.8358	20.6594	20.679	19.8342	19.7736	19.0183	19.963	19.0893	19.0962
A0A5G2QBB0	KNG1	A0A5G2QBB0_PIG	Kininogen 1	0.00103505	0.01335	-0.797966	16.4318	17.2014	17.1781	16.0916	16.9011	16.5659	15.931	15.8073	15.9282	15.593	15.9946	16.328	16.9362	16.8028	16.9057	16.456	15.7967	16.1687	16.639	15.818	15.3057	16.4007	15.7404	15.5747
F1STG6;I3LE48	IL1R2	F1STG6_PIG;I3LE48_PIG	Interleukin 1 receptor type 2	0.00112189	0.01412	0.811009	14.0644	14.4169	14.539	14.6153	14.57	13.9921	14.7587	15.3197	15.1156	15.6702	15.2898	14.9098	13.2448	14.8207	14.0616	14.3662	13.5959	14.3551	14.3668	14.1799	15.3713	14.7997	15.1284	14.6947
A0A286ZSR6;A0A286ZU24;A0A287A0Q2;A0A287ACL1;F1RJF7	SDF4	A0A286ZSR6_PIG;A0A286ZU24_PIG;A0A287A0Q2_PIG;A0A287ACL1_PIG;F1RJF7_PIG	Stromal cell derived factor 4;Stromal cell derived factor 4;Stromal cell derived factor 4;45 kDa calcium-binding protein isoform 2;Stromal cell derived factor 4	0.00125266	0.01554	1.13747	14.6974	13.6901	13.4328	13.2868	13.8829	14.1164	14.7771	15.512	13.9284	14.6626	15.5765	15.4745	13.6732	12.5759	13.6816	13.6279	13.6026	12.5447	13.5836	13.9597	13.2913	14.7395	13.2968	13.1936
Q9GLP1	F5	FA5_PIG	Coagulation factor V	0.00132395	0.0162	-0.700538	17.2312	17.453	17.9502	17.4384	17.6197	17.0179	16.9671	16.0176	16.7255	17.3784	16.7126	16.7059	18.0778	18.1572	17.9676	18.3562	17.7355	17.7728	18.2459	17.4455	17.2403	17.1409	17.4151	17.7159
A0A5G2QU06;A0A5G2QZA5;F1RWK7	PLXDC1	A0A5G2QU06_PIG;A0A5G2QZA5_PIG;F1RWK7_PIG	Plexin domain containing 1	0.00136045	0.0162	-0.369932	14.511	14.5931	14.2441	14.4185	14.4803	14.0719	14.1012	14.1964	13.6018	14.2086	14.0204	13.9709	14.208	14.2015	14.0751	13.9556	13.7159	14.2036	14.1428	13.9628	14.3606	13.615	13.7605	14.2451
A0A287BEU8;A0A5K1UL09;K7GPV8;Q9GKE2	CXCL16	A0A287BEU8_PIG;A0A5K1UL09_PIG;K7GPV8_PIG;CXL16_PIG	C-X-C motif chemokine 16	0.00135214	0.0162	1.21109	12.4707	10.6043	13.3759	12.3331	11.7536	11.9317	12.647	13.8199	12.5819	13.6356	13.7585	13.293	10.8086	11.5589	11.2406	12.234	11.6674	11.7007	12.2241	13.4303	13.1785	13.6839	12.7375	12.4054
F1RVL7	TREML1	F1RVL7_PIG	Triggering receptor expressed on myeloid cells like 1	0.00153734	0.01806	1.40347	13.9192	13.8652	13.6765	12.9646	12.6824	13.7043	14.5763	15.5188	14.2473	14.1901	15.627	15.0735	13.5965	13.8671	13.1072	14.0825	12.8319	12.6653	13.7819	14.8318	12.6547	15.3478	13.1363	13.0453
A0A287BP22;A0A5G2QC98	FSTL1	A0A287BP22_PIG;A0A5G2QC98_PIG	Follistatin like 1	0.00157159	0.01822	0.686951	16.7907	17.0146	16.6233	16.7434	16.6246	16.8663	17.3714	18.1877	17.0259	17.3063	17.6787	17.2147	16.4005	15.912	16.5205	16.3571	16.2757	16.6288	16.5916	16.9581	16.2466	17.3671	16.1657	16.0908
A0A287A0A9;F1S3P6;O19113	CCN2	A0A287A0A9_PIG;F1S3P6_PIG;CCN2_PIG	CCN family member 2	0.00189222	0.02165	1.13955	13.8914	13.3679	12.5997	13.58	13.73	15.3691	14.7272	15.6532	14.4881	14.4708	15.3689	14.6672	13.3196	13.6661	14.2288	13.1801	13.4005	14.0751	13.9121	14.2869	14.3204	14.6638	13.3236	13.9167
A0A286ZVE7;K7GK75;P10668	CFL1	A0A286ZVE7_PIG;K7GK75_PIG;COF1_PIG	Cofilin-1	0.00195324	0.02206	1.81407	13.3953	13.5674	13.5469	13.5359	13.0631	15.8876	14.4303	16.6939	15.2328	16.9934	16.5284	14.0017	13.3516	12.9361	13.0239	13.1835	13.7686	13.2725	13.0604	13.3993	16.1802	16.0631	16.2192	15.6532
Q6R953	DEFB1	Q6R953_PIG	Beta-defensin 1	0.00210084	0.02343	1.50953	13.5807	13.9739	14.4482	13.7328	14.5339	13.8459	15.5826	15.481	14.8095	15.8047	15.5802	15.9144	14.2811	14.0869	14.1642	14.648	14.4474	13.8074	15.4461	15.7641	18.8483	15.3774	17.4221	18.1704
F1RF79;P24259	NPPB;NPPA	F1RF79_PIG;ANF_PIG	Natriuretic peptides B;Natriuretic peptides A	0.00254501	0.02768	1.5638	14.7023	14.7786	13.9087	14.2267	14.5283	15.808	15.9904	16.2246	15.5589	15.5653	17.9731	16.0232	14.9779	14.5376	14.6963	14.6521	14.9829	14.5666	15.857	15.4992	14.0687	17.229	15.0948	13.8135
A0A5G2R5F2;F1SD66	CHGA	A0A5G2R5F2_PIG;F1SD66_PIG	Chromogranin-A	0.00252805	0.02768	2.33227	12.7743	12.995	12.2195	12.6188	12.9017	15.1777	15.1074	15.7799	14.7856	15.0164	16.2325	15.7589	13.7878	11.4383	13.3123	12.3794	12.7728	12.4775	13.6444	15.0012	16.9925	17.4108	12.4986	12.6508
F1RK01	CPB2	F1RK01_PIG	Carboxypeptidase B2	0.00268469	0.02884	-0.701522	20.6747	20.6504	21.1419	20.6706	20.8299	20.7222	20.5961	19.3763	20.0781	20.9106	19.467	20.0525	20.7329	20.6014	20.907	21.1492	20.7956	20.8484	21.123	20.6106	20.6482	20.459	20.0161	20.2943
A0A5G2RHU2;A5GFY8;K7GNA5	PHGDH	A0A5G2RHU2_PIG;SERA_PIG;K7GNA5_PIG	D-3-phosphoglycerate dehydrogenase	0.00286596	0.03042	1.90963	13.0626	10.7409	11.4921	11.6501	11.7734	11.9427	13.3493	15.7317	12.317	14.6943	14.0783	11.9489	12.7876	11.8539	12.8996	11.3269	12.4942	13.4455	14.956	14.4246	12.4116	12.9595	13.5305	13.4422
A0A287BMT4	NA	A0A287BMT4_PIG	Ig-like domain-containing protein	0.00299719	0.0314	-1.24662	13.0152	15.1381	13.5549	14.2484	13.7042	13.1934	13.7713	12.0918	12.634	12.6139	11.5869	12.6764	14.477	13.3145	12.5677	13.9943	14.1751	14.0714	13.8523	14.1424	13.3436	12.4178	13.3188	13.6737
A0A287AXI8	FSTL3	A0A287AXI8_PIG	Follistatin like 3	0.00302977	0.0314	1.37464	14.0845	13.3968	13.2689	13.4513	13.3857	14.2039	14.6405	15.7168	14.8046	14.5798	15.3744	14.9229	13.3519	12.7882	13.6911	12.7599	12.3436	12.7891	13.7308	14.7148	11.072	14.4106	13.6718	13.1305
A0A5S6HM44;Q8SPS7	HP	A0A5S6HM44_PIG;HPT_PIG	Haptoglobin	0.0031023	0.03178	2.64536	18.9762	16.6443	19.055	18.5845	18.8414	19.9686	20.8596	21.3048	21.5061	21.7679	20.4833	22.0205	20.6887	19.6985	19.3453	20.7371	20.8738	20.3174	24.3411	23.7048	19.047	22.2758	18.6408	19.2615
Q28833	VWF	VWF_PIG	von Willebrand factor (Fragment)	0.00368971	0.03575	1.13252	15.8441	15.1769	14.9452	16.2313	15.4345	14.782	17.0005	16.4717	16.0672	15.7544	16.2677	17.6475	15.5027	15.7627	14.5892	14.3854	14.9802	15.8876	15.3062	17.5718	15.8455	15.8703	15.6328	15.867
A0A287ALI8	SCRG1	A0A287ALI8_PIG	Stimulator of chondrogenesis 1	0.00369097	0.03575	0.753847	15.0949	14.7687	14.7443	15.1437	15.1213	15.0744	15.4593	16.2836	14.8612	15.3776	16.1213	16.3674	15.388	15.2054	15.359	14.9881	15.5307	15.1239	15.6791	15.9831	14.9601	15.6692	14.5129	14.9698
F1RQW7	C2	F1RQW7_PIG	Uncharacterized protein	0.00369251	0.03575	1.22921	14.4905	14.3555	13.8171	14.309	13.9864	15.3294	15.5101	15.2686	15.1314	16.0453	15.7564	15.9512	14.254	13.8307	13.3832	13.8455	14.0281	14.0642	16.1671	16.5854	14.7498	15.517	13.3139	14.648
F1REZ2;I3LFP3;K7GLS1	VCAN	F1REZ2_PIG;I3LFP3_PIG;K7GLS1_PIG	Versican	0.00360189	0.03575	2.22291	16.0829	13.5531	12.2682	13.6838	13.015	13.104	14.5391	17.0405	16.263	14.6316	17.1236	15.4466	14.1557	12.8802	13.6808	15.7444	13.1122	13.1222	13.1508	14.7382	12.2157	15.5366	12.9021	12.0116
A0A287B7Y4;A0A287BM40;A0A5G2Q9E8;A0A5G2QD14;F1RSK4	ICAM2	A0A287B7Y4_PIG;A0A287BM40_PIG;A0A5G2Q9E8_PIG;A0A5G2QD14_PIG;F1RSK4_PIG	ICAM_N domain-containing protein;Uncharacterized protein;ICAM_N domain-containing protein;ICAM_N domain-containing protein;ICAM_N domain-containing protein	0.00353872	0.03575	7.02101	11.9387	12.2033	0	0	11.93	0	12.9007	13.7874	12.406	12.7225	13.3667	13.0148	7.82508	0	12.0999	11.162	10.957	11.4307	11.3551	11.7692	11.8412	12.9612	11.7545	10.5473
P04404	CHGA	CMGA_PIG	Chromogranin-A (Fragment)	0.00386289	0.03699	1.87037	15.7259	15.0147	15.8377	15.7538	16.2261	16.7183	17.7334	18.4463	17.1885	17.253	18.4582	17.4193	15.2091	15.3032	16.4087	15.2993	15.8212	15.8724	15.7359	16.937	14.2731	18.8142	13.7497	15.0784
F1RU34	CST6	F1RU34_PIG	Cystatin E/M	0.00424998	0.03993	0.759865	16.9531	15.899	16.0924	16.0982	15.709	16.7729	17.1594	17.8325	16.1097	16.9582	17.396	16.6281	15.6491	16.0379	16.0094	15.4445	15.7294	15.5779	15.5001	15.9312	16.1309	16.3566	15.9991	16.1277
A0A287BFX0;A0A480DUX8;A0A5G2RBN6	TWSG1	A0A287BFX0_PIG;A0A480DUX8_PIG;A0A5G2RBN6_PIG	Twisted gastrulation BMP signaling modulator 1	0.00426008	0.03993	2.12207	14.7135	13.7463	14.5201	12.6952	14.9916	13.6087	16.4953	16.821	15.4937	14.4511	16.602	17.1445	12.5671	12.986	14.101	13.0715	14.5007	17.1238	14.8226	13.1671	15.7424	12.9133	16.8935	14.718
P48819	VTN	VTNC_PIG	Vitronectin	0.00449823	0.04086	-0.295006	21.3705	21.1135	21.718	21.4405	21.695	21.7129	21.2018	21.3691	21.433	21.5395	21.3665	20.3705	21.5994	21.7736	22.2506	21.9506	21.9033	22.2523	21.6297	21.6293	22.3214	21.8322	22.1596	22.1718
A0A287A016;A0A287BE48	PLXDC2	A0A287A016_PIG;A0A287BE48_PIG	Plexin domain containing 2	0.00447364	0.04086	0.538405	17.8398	17.6504	17.4967	17.6644	17.4131	17.5113	17.8459	18.5013	18.003	17.9728	18.2859	18.1971	17.44	17.379	17.1222	17.0795	17.2202	17.291	17.1117	17.3528	16.768	18.0012	16.7936	16.5412
A0A287A0W9;P17630	TCN1	A0A287A0W9_PIG;TCO1_PIG	Transcobalamin-1	0.00441091	0.04086	1.679	12.9336	12.2034	12.2432	10.2135	11.8533	11.7428	13.532	14.4916	13.624	11.7609	13.8894	13.9658	10.144	11.321	12.739	11.5599	12.6355	12.5803	12.0233	12.161	11.0578	14.2649	11.8935	11.9257
A0A287AS68;A0A5G2QR79;Q29042	FCN1	A0A287AS68_PIG;A0A5G2QR79_PIG;FCN1_PIG	Ficolin-1	0.00465836	0.04188	1.80415	16.1369	14.2137	14.1863	12.6367	13.4397	15.5656	18.11	14.932	14.8815	16.7393	16.9087	15.4322	13.0751	14.3418	13.6302	13.0814	14.1688	13.7493	13.5139	14.0812	14.0366	15.5373	13.4195	13.7227
A0A286ZRX5;A0A287BEN0;A0A287BRY6;F1RW32	SPARCL1	A0A286ZRX5_PIG;A0A287BEN0_PIG;A0A287BRY6_PIG;F1RW32_PIG	SPARC like 1	0.00478111	0.04255	-0.704912	15.9295	16.8406	16.5933	17.2207	16.3764	16.3929	16.0404	16.2447	15.6704	14.9941	16.3612	15.8131	16.4323	16.2744	16.0152	16.3845	16.8237	16.6663	15.4739	15.7609	16.1726	16.4363	16.1136	16.3186
A0A287ATY3;F1S280	ENPP2	A0A287ATY3_PIG;F1S280_PIG	Ectonucleotide pyrophosphatase/phosphodiesterase 2	0.00490006	0.04317	-0.330401	15.9836	16.3266	16.2782	16.2061	16.3718	16.0596	15.8257	15.9041	15.8204	15.7713	16.0491	15.873	16.2496	15.7769	15.9188	16.0819	16.1329	16.0114	15.9635	15.598	16.4379	15.9094	16.081	15.7625
A0A286ZFW3	APOH	A0A286ZFW3_PIG	Apolipoprotein H	0.00509706	0.04446	-0.391662	22.7522	22.8106	22.5862	22.3075	22.7061	22.3179	22.4408	21.8017	22.2916	22.3743	22.1713	22.0508	22.0948	22.4342	22.6782	22.7672	22.3433	22.6757	22.8526	22.3182	22.7748	22.5175	22.3793	22.7227
Q8MI69	WFDC2	WFDC2_PIG	WAP four-disulfide core domain protein 2	0.00515774	0.04455	1.11596	15.0328	14.3159	14.4041	14.36	14.4089	14.1753	15.6145	16.4841	15.0619	14.9663	15.9081	15.3577	12.8283	14.0829	14.8157	13.8808	13.9422	14.2816	13.9542	14.7155	12.9756	15.6404	13.7823	14.716

## Sheet: 22h_LOW_CON - HIGH_CON
Accession ID	Gene ID	Protein Name	Protein Description	rawP	adjp	log2FC	HIGH_CON	HIGH_CON	HIGH_CON	HIGH_CON	HIGH_CON	HIGH_CON	HIGH_SE	HIGH_SE	HIGH_SE	HIGH_SE	HIGH_SE	HIGH_SE	LOW_CON	LOW_CON	LOW_CON	LOW_CON	LOW_CON	LOW_CON	LOW_SE	LOW_SE	LOW_SE	LOW_SE	LOW_SE	LOW_SE
A0A480P2B4	SERPINA5	A0A480P2B4_PIG	Plasma serine protease inhibitor preproprotein	6.47704e-09	0	0.697015	19.3658	18.7912	19.4915	19.1401	19.3926	19.111	18.7987	18.2103	18.509	18.5516	18.6563	18.3418	19.6354	19.7371	20.1038	20.0249	20.0325	19.9406	19.6553	19.0562	19.3293	19.3143	19.6687	19.5626
P20305	GSN	GELS_PIG	Gelsolin (Fragment)	1.91069e-13	0	0.68571	22.0383	21.9904	22.408	22.014	22.054	22.2954	21.9345	21.7498	21.8432	21.8304	21.959	21.5683	22.694	22.5293	23.3048	23.0342	22.5248	22.8271	22.3632	22.0755	22.4746	22.341	22.4339	22.2611
F6PSJ3	APOC2	F6PSJ3_PIG	Uncharacterized protein	0	0	2.27423	18.7806	17.4543	18.7707	18.2571	18.4467	18.8237	17.3202	17.8012	17.9688	17.5238	18.2053	17.159	20.7015	20.4864	20.8164	20.8358	20.6594	20.679	19.8342	19.7736	19.0183	19.963	19.0893	19.0962
F1RN40	F7	F1RN40_PIG	Uncharacterized protein	3.16106e-11	0	2.52087	13.0278	10.4573	12.4813	12.4705	11.1334	12.3594	13.9931	12.2107	13.1825	13.7947	12.7307	12.7749	14.4319	13.9482	14.2373	15.5094	14.3311	14.5971	14.631	13.4234	13.9755	14.5325	14.1635	13.5823
F1RM45	APOE	F1RM45_PIG	Apolipoprotein E	0	0	1.38576	18.2166	17.3399	17.296	17.5079	17.1391	18.2205	17.0986	17.2152	17.3984	17.0501	16.7131	17.0336	18.973	19.3416	18.7699	19.1553	18.898	18.8968	18.4524	17.9778	18.8054	18.4403	18.1869	18.4471
P18650	APOE	APOE_PIG	Apolipoprotein E	5.25736e-11	0	1.37364	21.9839	21.4345	21.5425	21.7315	21.3433	22.2882	21.1342	21.2613	21.5624	21.1683	20.9714	20.717	23.2861	23.0918	22.8344	23.2916	22.9522	23.1096	22.7355	22.1857	21.8401	22.6073	21.9816	21.0845
F1SJZ1	STC2	F1SJZ1_PIG	Stanniocalcin-2	6.44159e-09	0	-1.04789	15.3632	15.1224	14.8204	15.2192	15.1234	15.2051	15.3381	15.6991	15.1526	16.0434	15.7109	15.0726	14.0108	14.1171	14.1657	14.1393	14.0399	14.0936	13.9193	14.2582	14.5008	14.8839	13.3272	14.2397
A0A5G2QLU1;P27917	APOC3	A0A5G2QLU1_PIG;APOC3_PIG	Apolipoprotein C-III	0	0	2.20066	21.4205	19.9051	21.5577	20.8228	21.422	21.6387	20.9766	21.2043	21.9883	21.3959	21.1784	20.9505	23.2052	23.2389	23.3503	23.5613	23.5269	23.0882	23.0293	22.6095	22.557	23.1917	22.0128	22.0363
F1SCE6;I3LMU0	SERPINA11	F1SCE6_PIG;I3LMU0_PIG	Serpin family A member 11	2.0375e-10	0	2.55963	13.0397	10.2697	13.693	11.6129	13.1722	13.429	12.9201	12.9097	13.5651	12.3372	13.4586	13.2475	14.8704	15.1172	14.8864	15.3558	15.2368	15.1076	14.9541	15.5097	14.4843	14.5862	14.3093	14.4467
C6JWG4	FGF21	C6JWG4_PIG	Fibroblast growth factor	4.44089e-16	0	-5.00781	15.9508	16.5923	14.3949	15.4701	16.0551	16.324	15.3739	15.8219	14.2753	15.527	15.8442	15.718	12.4634	10.092	12.2035	10.5412	11.4165	8.02379	13.4875	13.0981	10.573	13.4165	11.0357	12.5025
A0A286ZQ00	LOC100515857	A0A286ZQ00_PIG	C-C motif chemokine	3.7718e-07	3e-05	2.53158	12.5509	9.42758	11.8362	11.7857	11.9423	12.8862	13.1014	13.414	11.594	11.3765	13.7156	11.8694	14.3688	14.1211	14.5274	14.2077	14.3859	14.0074	13.6228	13.6624	14.7004	13.8993	14.3401	15.6101
A0A287AT36;A0A5G2QNM7;F1S790	C8B	A0A287AT36_PIG;A0A5G2QNM7_PIG;F1S790_PIG	MACPF domain-containing protein	7.58583e-07	6e-05	0.806824	16.3966	15.9019	17.0855	15.9803	17.0384	16.2381	16.5975	16.0808	16.2665	16.6022	16.5951	16.1589	16.9334	17.0795	17.6555	17.2066	17.5043	17.1025	17.102	16.805	16.5175	16.5119	16.6638	16.5729
A0A287BG16	B4GALT1	A0A287BG16_PIG	Beta-1,4-galactosyltransferase 1	1.82242e-06	0.00013	-0.410691	16.3873	16.4501	16.3819	16.4181	16.4492	16.6224	16.5084	16.6646	16.1366	16.5151	16.6865	16.3026	16.0341	16.0228	16.366	15.8135	15.8415	16.1671	15.9068	16.1211	16.1432	16.1439	15.8607	15.7501
A0A287AG13	APOB	A0A287AG13_PIG	Apolipoprotein B	2.06461e-06	0.00014	0.901523	20.8479	20.2771	20.3635	20.5486	20.6244	20.6701	20.55	19.8971	20.2299	20.6926	20.0517	20.9529	21.3757	21.3022	21.1763	21.7199	21.7948	21.3717	21.2246	21.074	20.0328	21.2717	20.9302	20.3368
I3L5U6	LBP	I3L5U6_PIG	Uncharacterized protein	3.97047e-06	0.00025	1.40205	17.9174	17.2405	17.5652	16.4187	17.4977	17.0611	18.331	17.1665	18.4997	18.0788	18.1488	18.5598	18.2586	18.6043	18.9864	18.8978	19.0407	18.3251	19.4888	19.2792	17.8678	19.4405	18.2761	17.946
A0A286ZV56;A0A287AP40;A0A287BIN3;A0A288CG38	CACNA2D1	A0A286ZV56_PIG;A0A287AP40_PIG;A0A287BIN3_PIG;A0A288CG38_PIG	Calcium voltage-gated channel auxiliary subunit alpha2delta 1	8.50429e-06	0.00051	-0.50193	15.5672	15.5919	15.1458	15.5122	15.199	15.4663	15.227	15.2366	15.3263	15.7705	15.3868	15.2849	14.8281	15.0696	14.7583	14.9688	15.0501	14.7959	14.6098	14.7693	15.1216	14.9698	15.3207	15.3375
A0A286ZQI5;A0A286ZZM6;A0A287AQ76;A0A287ASJ8	CHL1	A0A286ZQI5_PIG;A0A286ZZM6_PIG;A0A287AQ76_PIG;A0A287ASJ8_PIG	Cell adhesion molecule L1 like	1.25588e-05	0.0007	-0.437111	16.4684	16.5591	16.5475	16.6954	16.4428	16.0692	16.3572	16.2715	16.4412	16.4366	16.4695	16.3808	16.1069	16.0146	15.7137	16.009	16.2534	16.0622	15.6704	15.6463	15.9262	16.1252	15.7356	15.5433
F1S0Y1	HMCN2	F1S0Y1_PIG	Hemicentin 2	1.34168e-05	0.00071	-0.776757	16.6717	16.1197	16.2012	16.7558	16.0096	16.8802	15.6889	16.1906	16.6974	15.9429	16.5377	15.4356	16.0716	16.1753	15.9696	15.247	15.1972	15.3169	14.8827	15.0579	15.8239	15.4906	15.5125	15.6796
A0A287B2K4;A0A287B3A2;I3LB28	NRP2	A0A287B2K4_PIG;A0A287B3A2_PIG;I3LB28_PIG	Neuropilin	1.88577e-05	0.00094	-0.453476	16.3719	16.5783	16.0799	16.5556	16.3969	16.3999	16.2963	16.0733	16.4689	16.2224	16.2578	16.4114	16.3055	16.2268	15.966	15.6317	15.7639	15.7678	16.08	15.9361	16.3605	16.1571	16.002	16.3109
F1S788	C8A	F1S788_PIG	Complement C8 alpha chain	1.99349e-05	0.00095	0.741445	16.532	16.2858	17.0971	16.3931	17.0354	16.9764	17.0758	16.3158	17.0044	17.0702	16.9815	16.4328	17.4214	17.7089	17.8399	17.3666	17.264	17.1676	17.4244	17.0086	16.833	16.8059	16.8662	17.0203
A0A287A1I6	PCDH18	A0A287A1I6_PIG	Protocadherin 18	3.16179e-05	0.00143	-0.475948	15.3082	15.2858	14.8284	15.3306	15.0266	15.2484	15.0672	15.1187	15.1473	14.7425	14.9842	15.421	14.9482	14.9115	14.5491	14.5732	14.8043	14.3861	13.9286	14.4859	14.376	14.7136	14.74	14.5877
A0A5G2RJ79	APOC2	A0A5G2RJ79_PIG	Uncharacterized protein	8.91584e-05	0.00385	1.74125	14.4711	15.0088	15.0945	12.8274	14.0766	13.3035	14.1094	15.0897	14.5878	13.3962	15.1233	12.1727	15.2937	16.2256	15.8702	16.1206	16.2432	15.4762	15.689	15.3799	15.0171	14.8763	14.6838	14.8384
A0A5G2QP78;K7GMF9	ANPEP	A0A5G2QP78_PIG;K7GMF9_PIG	Aminopeptidase	0.000101925	0.00413	-0.464918	16.2566	16.7322	16.5653	16.0395	16.6799	16.1697	16.351	16.5272	16.4411	16.6674	16.3653	16.0382	15.8113	15.5522	16.0461	16.0927	16.0732	16.0783	16.0544	15.7616	16.0849	15.8794	15.901	15.8097
A0A287BRD6	CCL16	A0A287BRD6_PIG	C-C motif chemokine	0.000104302	0.00413	1.78666	11.699	12.4196	12.7022	12.8647	11.0222	12.8775	11.6137	12.4208	11.6684	11.6266	13.2883	12.6231	14.1844	14.1781	13.7322	14.1206	13.994	14.0959	12.2728	12.784	14.7139	13.5008	11.5287	11.8216
A0A287BIL8	HSPA5	A0A287BIL8_PIG	Endoplasmic reticulum chaperone BiP	0.000144992	0.00552	-1.18833	16.5473	16.7669	16.3052	17.0217	16.1115	17.2572	16.1688	17.1717	16.3238	16.6051	16.6356	17.123	15.6002	15.3169	16.0699	15.0087	15.1955	15.6887	15.7665	16.1331	13.9019	16.2403	15.2519	15.0537
A0A287AWY5	PCDHGA4	A0A287AWY5_PIG	Protocadherin gamma subfamily A, 4	0.000222396	0.00783	-0.609096	16.0619	15.6349	15.647	15.9454	15.7446	15.9503	15.7837	15.7965	15.7546	15.121	15.9771	15.2699	14.9539	15.2598	15.4528	14.7907	15.2004	15.672	14.9404	15.3564	15.3912	15.6511	15.4029	15.4804
F6QA08	PDIA3	F6QA08_PIG	Protein disulfide-isomerase	0.00021637	0.00783	-0.920557	15.1153	15.1657	14.4969	15.1135	14.3127	15.6573	14.1568	15.6001	14.7881	14.2753	14.8954	14.5022	14.4609	14.1299	13.937	13.8203	13.8597	14.1302	13.7479	14.0764	13.9907	14.1663	13.1413	13.5409
A0A287A3Z4;F1SC80;P27485	RBP4	A0A287A3Z4_PIG;F1SC80_PIG;RET4_PIG	Retinol-binding protein 4;Retinol-binding protein;Retinol-binding protein 4	0.000237601	0.00807	0.777184	19.1245	18.0957	19.2318	18.2146	19.2849	18.4463	18.9623	19.4209	18.1687	18.1431	19.0532	18.0167	18.5754	19.3904	20.1286	19.7796	19.2899	19.8968	18.9532	19.2713	20.0614	19.5141	19.385	19.6777
P0DSN9	SAA4	SAA4_PIG	Serum amyloid A-4 protein	0.000597506	0.01959	2.57992	11.1943	13.7829	13.2869	12.5157	13.1135	12.8429	14.5761	12.8783	14.6646	14.7723	14.1686	13.9406	14.5848	15.9265	16.1234	15.7837	15.2104	14.587	17.2267	16.881	10.7528	16.3364	13.9657	13.5769
A0A286ZJ21;A0A287ADL0;I3LEW0	COLEC11	A0A286ZJ21_PIG;A0A287ADL0_PIG;I3LEW0_PIG	Collectin subfamily member 11	0.000784829	0.02488	-0.437677	17.1541	16.9293	16.7553	16.7694	17.0123	17.0413	16.4735	15.9333	16.6016	16.4862	16.2398	16.119	16.748	16.7502	16.3517	16.3469	16.516	16.3229	15.7745	16.0177	16.122	16.1454	16.584	15.9797
F1RPW2	F5	F1RPW2_PIG	Coagulation factor V	0.000857569	0.02505	0.838407	16.3417	16.3013	16.8966	16.3416	16.4297	15.0902	16.0629	15.0931	15.6059	15.067	16.0925	15.861	17.1203	17.5017	17.2077	17.274	16.6383	16.6894	17.2437	16.4368	16.3646	16.3182	16.5037	16.4089
F1SFD1	TIE1	F1SFD1_PIG	Tyrosine kinase with immunoglobulin like and EGF like domains 1	0.000852739	0.02505	-0.645645	15.6597	15.7284	15.5592	15.9785	15.6635	16.0677	16.184	16.1108	16.4223	16.084	16.3948	15.7102	15.5102	14.1788	15.6096	15.1066	14.8645	15.5134	15.1024	15.3294	15.7727	16.3988	15.4716	15.8901
A0A287BSC3;A0A480UBK2	ALPL	A0A287BSC3_PIG;A0A480UBK2_PIG	Alkaline phosphatase	0.000869114	0.02505	-0.737561	16.0308	16.2369	15.4454	16.2871	15.9917	15.7059	16.1935	16.1357	15.9885	16.3112	16.0147	16.456	15.2708	15.2097	15.2297	15.1172	15.303	15.1419	15.5531	15.4764	14.9307	16.2793	14.4271	15.3515
Q28944	CTSL	CATL1_PIG	Cathepsin L1	0.000901141	0.02521	0.717663	16.6969	15.7065	16.3704	16.2084	16.0234	16.684	15.9505	16.6078	16.0851	16.1898	15.9203	16.2058	16.1814	17.2466	17.0102	17.4127	17.1389	17.0057	15.9477	16.5416	16.3939	16.9118	16.2478	16.2733
A0A5G2QSL2;I3LJ52	CTRB2	A0A5G2QSL2_PIG;I3LJ52_PIG	Peptidase S1 domain-containing protein	0.00118383	0.03127	-1.67923	12.1604	12.3666	13.9388	12.4526	13.9071	12.0895	14.2175	16.5456	12.5271	13.8813	14.8046	12.9025	11.0212	10.4897	12.3391	10.3933	11.4566	11.1397	12.6172	13.2933	9.87177	13.3218	13.4369	12.8448
P79403	GANAB	GANAB_PIG	Neutral alpha-glucosidase AB	0.00117531	0.03127	-1.67768	14.0066	14.937	13.449	14.7412	13.585	14.421	11.7568	14.7916	13.5123	14.3493	14.0799	12.9106	12.9443	12.8471	12.7545	12.0398	12.4251	12.0628	11.4792	13.7532	10.4456	11.3993	11.6663	13.1821
A0A5G2QYG4;A0A5K1VAR5;F1RL75	PDGFRB	A0A5G2QYG4_PIG;A0A5K1VAR5_PIG;F1RL75_PIG	Platelet-derived growth factor receptor beta	0.00123422	0.03172	-0.506615	14.913	14.7438	14.3113	14.6109	14.3951	14.4043	13.954	14.2534	14.4242	14.2907	14.5787	14.0854	14.4838	14.0209	14.1915	14.0424	13.6543	13.9457	13.9063	13.6332	14.2042	14.3783	14.253	14.5475
F1RN76	CD5L	F1RN76_PIG	Uncharacterized protein	0.00145167	0.03633	0.852392	18.5287	18.5922	18.5692	18.4862	18.57	18.5277	18.8621	18.0566	19.0903	19.0938	17.4703	18.8482	19.0795	19.5571	19.3658	19.6109	19.258	19.5171	18.7874	18.5132	17.9915	19.1874	17.5644	17.8361
F1RRN0	PTK7	F1RRN0_PIG	Protein tyrosine kinase 7 (inactive)	0.00167034	0.04036	-0.505323	17.2149	16.5211	16.5832	16.7	16.8183	16.9596	16.6005	16.9848	17.0179	16.9066	16.8438	16.4039	16.4341	16.3649	16.1772	16.0472	16.1633	16.5783	15.8232	15.9664	15.981	16.4318	16.7083	16.057
A0A5G2Q6R4	HMCN2	A0A5G2Q6R4_PIG	Hemicentin 2	0.00169769	0.04036	-0.864537	16.2318	15.5524	15.7405	16.3634	15.1552	15.922	15.171	16.0018	16.3027	15.5102	16.6868	14.4024	15.3802	15.4578	15.2227	14.5949	14.4626	14.6599	13.9337	14.3144	15.7887	15.0289	15.1064	15.8703
A0A5G2R0K3;F1RN41	F10	A0A5G2R0K3_PIG;F1RN41_PIG	Uncharacterized protein	0.00203289	0.04715	0.892605	18.9353	17.7914	19.2374	18.5476	18.6217	18.9701	19.2932	18.2568	18.8787	19.3704	18.5476	18.9779	19.3221	19.648	19.5046	19.8202	19.7184	19.4458	19.4635	19.2528	18.7246	19.4446	17.893	18.4034

## Sheet: 22h_HIGH_SE - LOW_SE_x0009__x0009_
Accession ID	Gene ID	Protein Name	Protein Description	rawP	adjp	log2FC	HIGH_CON	HIGH_CON	HIGH_CON	HIGH_CON	HIGH_CON	HIGH_CON	HIGH_SE	HIGH_SE	HIGH_SE	HIGH_SE	HIGH_SE	HIGH_SE	LOW_CON	LOW_CON	LOW_CON	LOW_CON	LOW_CON	LOW_CON	LOW_SE	LOW_SE	LOW_SE	LOW_SE	LOW_SE	LOW_SE
A0A480P2B4	SERPINA5	A0A480P2B4_PIG	Plasma serine protease inhibitor preproprotein	2.27596e-14	0	-0.919782	19.3658	18.7912	19.4915	19.1401	19.3926	19.111	18.7987	18.2103	18.509	18.5516	18.6563	18.3418	19.6354	19.7371	20.1038	20.0249	20.0325	19.9406	19.6553	19.0562	19.3293	19.3143	19.6687	19.5626
P20305	GSN	GELS_PIG	Gelsolin (Fragment)	5.36982e-08	0	-0.510665	22.0383	21.9904	22.408	22.014	22.054	22.2954	21.9345	21.7498	21.8432	21.8304	21.959	21.5683	22.694	22.5293	23.3048	23.0342	22.5248	22.8271	22.3632	22.0755	22.4746	22.341	22.4339	22.2611
F6PSJ3	APOC2	F6PSJ3_PIG	Uncharacterized protein	4.44089e-16	0	-1.79941	18.7806	17.4543	18.7707	18.2571	18.4467	18.8237	17.3202	17.8012	17.9688	17.5238	18.2053	17.159	20.7015	20.4864	20.8164	20.8358	20.6594	20.679	19.8342	19.7736	19.0183	19.963	19.0893	19.0962
F1RM45	APOE	F1RM45_PIG	Apolipoprotein E	6.6358e-13	0	-1.30018	18.2166	17.3399	17.296	17.5079	17.1391	18.2205	17.0986	17.2152	17.3984	17.0501	16.7131	17.0336	18.973	19.3416	18.7699	19.1553	18.898	18.8968	18.4524	17.9778	18.8054	18.4403	18.1869	18.4471
F1SJZ1	STC2	F1SJZ1_PIG	Stanniocalcin-2	3.95572e-13	0	1.3146	15.3632	15.1224	14.8204	15.2192	15.1234	15.2051	15.3381	15.6991	15.1526	16.0434	15.7109	15.0726	14.0108	14.1171	14.1657	14.1393	14.0399	14.0936	13.9193	14.2582	14.5008	14.8839	13.3272	14.2397
A0A286ZQI5;A0A286ZZM6;A0A287AQ76;A0A287ASJ8	CHL1	A0A286ZQI5_PIG;A0A286ZZM6_PIG;A0A287AQ76_PIG;A0A287ASJ8_PIG	Cell adhesion molecule L1 like	1.85159e-10	0	0.618311	16.4684	16.5591	16.5475	16.6954	16.4428	16.0692	16.3572	16.2715	16.4412	16.4366	16.4695	16.3808	16.1069	16.0146	15.7137	16.009	16.2534	16.0622	15.6704	15.6463	15.9262	16.1252	15.7356	15.5433
A0A287A1I6	PCDH18	A0A287A1I6_PIG	Protocadherin 18	3.04992e-09	0	0.608185	15.3082	15.2858	14.8284	15.3306	15.0266	15.2484	15.0672	15.1187	15.1473	14.7425	14.9842	15.421	14.9482	14.9115	14.5491	14.5732	14.8043	14.3861	13.9286	14.4859	14.376	14.7136	14.74	14.5877
A0A287A3Z4;F1SC80;P27485	RBP4	A0A287A3Z4_PIG;F1SC80_PIG;RET4_PIG	Retinol-binding protein 4;Retinol-binding protein;Retinol-binding protein 4	9.11183e-09	0	-0.849614	19.1245	18.0957	19.2318	18.2146	19.2849	18.4463	18.9623	19.4209	18.1687	18.1431	19.0532	18.0167	18.5754	19.3904	20.1286	19.7796	19.2899	19.8968	18.9532	19.2713	20.0614	19.5141	19.385	19.6777
P48819	VTN	VTNC_PIG	Vitronectin	4.63132e-11	0	-0.743935	21.3705	21.1135	21.718	21.4405	21.695	21.7129	21.2018	21.3691	21.433	21.5395	21.3665	20.3705	21.5994	21.7736	22.2506	21.9506	21.9033	22.2523	21.6297	21.6293	22.3214	21.8322	22.1596	22.1718
A0A287A1S6;A0A287BLD2;A0A5G2QQE9	COL1A1	A0A287A1S6_PIG;A0A287BLD2_PIG;A0A5G2QQE9_PIG	Collagen alpha-1(I) chain preproprotein;Collagen type I alpha 1 chain;Collagen type I alpha 1 chain	7.82707e-14	0	1.7951	20.4209	19.6846	18.7918	20.4743	19.2279	20.2099	20.05	21.0102	20.4962	20.6705	20.4532	19.8213	19.2212	18.6646	18.8651	19.0458	18.9731	19.2649	17.8445	18.4324	18.9313	19.0173	18.8867	18.6185
A0A287BH90;F1SMJ6	C9	A0A287BH90_PIG;F1SMJ6_PIG	MACPF domain-containing protein	1.86381e-10	0	-1.21365	17.1186	17.8601	18.5445	17.7226	18.2444	17.7774	18.103	17.0707	17.451	17.9764	17.7501	17.1151	18.3653	18.1724	18.6059	18.6193	18.6049	18.679	18.6903	18.6248	19.0008	18.0629	18.9405	19.429
A0A5G2Q7R0;A0A5G2QW87	COL6A1	A0A5G2Q7R0_PIG;A0A5G2QW87_PIG	Collagen type VI alpha 1 chain	7.61772e-10	0	1.12735	20.2333	20.1151	19.8253	20.2688	19.8112	19.7605	19.655	20.5118	19.8641	19.5078	19.7751	19.6458	19.6249	19.6428	19.6416	18.9775	19.1055	19.6883	18.5133	18.5247	18.1649	18.9616	19.1886	18.8424
A0A287B3S3	ITIH1	A0A287B3S3_PIG	Inter-alpha-trypsin inhibitor heavy chain H1	9.16216e-08	0	-0.709785	20.8436	21.0854	21.162	21.0801	21.2364	20.1883	20.4917	19.9887	20.066	20.3248	19.9477	20.431	21.0691	21.4611	21.5589	21.07	21.1869	21.2518	21.1221	21.0216	20.8373	20.5161	20.8898	21.1219
A0A286ZT02;A0A287AUX9;A0A5G2QQ19;F1RPW8	ASRGL1	A0A286ZT02_PIG;A0A287AUX9_PIG;A0A5G2QQ19_PIG;F1RPW8_PIG	Asparaginase and isoaspartyl peptidase 1	2.94981e-10	0	-1.88635	13.6423	13.6766	15.8662	11.8238	17.6465	13.7633	14.4422	14.5703	11.6714	13.2061	13.7996	13.6772	14.2132	17.3064	16.6768	13.0049	13.0342	17.5144	16.4994	16.7389	13.828	15.9303	14.7275	14.961
A0A5G2RCQ0;I3LB80	SLC3A2	A0A5G2RCQ0_PIG;I3LB80_PIG	Solute carrier family 3 member 2	8.36741e-08	0	1.56019	14.9442	15.5955	14.9726	15.3663	15.223	15.2886	15.2504	15.3808	15.5139	15.8616	15.2393	15.1396	14.9229	14.5229	14.9477	14.5224	14.7464	14.5178	14.4929	14.3092	12.5495	14.7107	14.1369	12.8253
A0A287A016;A0A287BE48	PLXDC2	A0A287A016_PIG;A0A287BE48_PIG	Plexin domain containing 2	4.30154e-09	0	1.03958	17.8398	17.6504	17.4967	17.6644	17.4131	17.5113	17.8459	18.5013	18.003	17.9728	18.2859	18.1971	17.44	17.379	17.1222	17.0795	17.2202	17.291	17.1117	17.3528	16.768	18.0012	16.7936	16.5412
K7GP14;P31936	IBSP	K7GP14_PIG;SIAL_PIG	Bone sialoprotein 2	1.06093e-07	0	2.98223	14.1395	13.815	13.431	14.1666	15.7497	14.1929	16.5303	17.6609	16.519	15.924	17.0634	14.8396	14.4891	14.1947	13.9854	13.5794	13.5177	13.3386	14.1649	14.9538	13.9099	13.4556	13.3852	10.7743
A0A287AE47;A0A287B310	STOM	A0A287AE47_PIG;A0A287B310_PIG	Stomatin	1.65128e-07	1e-05	1.38278	13.1813	13.9008	13.4626	13.7685	13.1194	14.461	14.5351	14.798	16.1288	14.6526	15.8287	15.8764	15.0475	12.9446	13.1444	13.6135	13.5982	13.2504	13.2641	13.8399	13.6352	15.4472	13.2982	14.0383
P14287	SPP1	OSTP_PIG	Osteopontin	3.24462e-07	1e-05	1.22402	18.7862	18.3832	17.9418	18.3087	18.3458	18.7767	19.6155	19.9358	18.9418	19.3118	19.9695	19.3404	18.2724	18.1001	18.4244	17.9054	18.0279	17.8299	18.7175	19.2769	18.0452	17.6277	18.1378	17.9657
P50828	HPX	HEMO_PIG	Hemopexin	1.50453e-07	1e-05	-3.1512	17.7606	17.0168	17.5808	17.7866	18.217	18.0072	17.5894	17.1097	17.3296	17.8398	17.4032	18.2552	17.9303	18.7967	17.8214	18.1356	18.5253	17.7997	20.0959	18.9919	23.2439	18.2068	22.0304	21.8653
O02668	ITIH2	ITIH2_PIG	Inter-alpha-trypsin inhibitor heavy chain H2	9.89553e-07	4e-05	-0.937469	21.5431	21.7292	22.2427	21.8941	22.0211	21.1403	21.105	20.6256	20.8051	21.0314	20.5421	20.929	21.6732	22.0211	22.3984	21.5426	21.6059	21.7592	21.4938	21.5922	22.2658	21.0991	21.985	22.2271
A0A287AG58	PZP	A0A287AG58_PIG	Uncharacterized protein	1.54643e-06	5e-05	-1.16146	17.6532	18.7779	18.3549	18.4279	18.6164	18.6835	18.2386	17.4971	18.419	18.0158	18.1574	18.2044	19.1948	18.6825	18.7743	19.2266	18.8752	18.5557	19.584	19.5169	18.8147	18.3758	19.4463	19.7634
A0A287A4X6;A0A5G2QL34;A0A5G2QTJ9;I3LU56	ICOSLG	A0A287A4X6_PIG;A0A5G2QL34_PIG;A0A5G2QTJ9_PIG;I3LU56_PIG	Ig-like domain-containing protein	1.71128e-06	6e-05	0.731363	17.4755	17.5114	17.13	17.402	17.1822	17.1684	17.4567	17.7876	17.256	17.5934	17.706	17.5352	16.5573	16.5929	17.3064	16.6438	17.115	17.1926	16.6912	16.8008	16.4506	17.3236	17.0024	16.6781
A0A5G2QJT3;F1RHA9	LECT2	A0A5G2QJT3_PIG;F1RHA9_PIG	Leukocyte cell-derived chemotaxin-2;Leukocyte cell derived chemotaxin 2	1.89584e-06	6e-05	-1.22896	12.1896	11.205	11.9105	12.0891	12.0961	12.1443	9.8826	10.3055	10.2416	9.42327	10.1595	10.3463	12.6388	12.3843	12.5255	12.1568	11.8757	11.8838	11.4244	11.4916	11.4555	11.1807	10.1742	12.0062
I3L638	VTN	I3L638_PIG	Vitronectin	1.78828e-06	6e-05	-0.944428	14.4188	16.4766	17.9933	16.3409	18.1807	15.3299	16.4957	17.7535	14.5086	17.6462	16.835	13.8379	14.0612	14.6911	18.9172	17.4749	17.1125	18.6347	16.9847	16.9234	17.3911	17.0261	17.0582	17.36
A0A5G2QLU1;P27917	APOC3	A0A5G2QLU1_PIG;APOC3_PIG	Apolipoprotein C-III	2.56277e-06	8e-05	-1.29043	21.4205	19.9051	21.5577	20.8228	21.422	21.6387	20.9766	21.2043	21.9883	21.3959	21.1784	20.9505	23.2052	23.2389	23.3503	23.5613	23.5269	23.0882	23.0293	22.6095	22.557	23.1917	22.0128	22.0363
C6JWG4	FGF21	C6JWG4_PIG	Fibroblast growth factor	7.63293e-06	0.0002	3.0745	15.9508	16.5923	14.3949	15.4701	16.0551	16.324	15.3739	15.8219	14.2753	15.527	15.8442	15.718	12.4634	10.092	12.2035	10.5412	11.4165	8.02379	13.4875	13.0981	10.573	13.4165	11.0357	12.5025
A0A5G2QN51;I3LC80	SEMA7A	A0A5G2QN51_PIG;I3LC80_PIG	Semaphorin 7A (John Milton Hagen blood group)	7.80236e-06	0.0002	0.932994	15.2686	14.9056	14.5467	14.9728	14.9057	15.4806	15.2774	15.8563	16.2352	15.5908	16.3139	15.5414	14.2579	15.0406	14.5163	14.2299	14.3554	14.2612	13.921	14.7314	14.9512	15.2888	15.3629	14.9618
A0A5G2QKI1;Q8MJ39	MGP	A0A5G2QKI1_PIG;MGP_PIG	Matrix Gla protein	7.71679e-06	0.0002	1.67426	18.0879	18.2191	18.1102	18.0763	18.3383	18.8544	20.5477	20.2719	20.382	20.3879	20.6279	21.1689	17.6393	17.7497	17.6259	17.2914	17.2444	16.9487	18.8893	20.3247	17.422	20.2412	18.2399	18.2235
A0A287ALH4;A0A287AQG0;A0A287B901;A0A2C9F3C8;K7GNA9;K7GPI3;K7GS31;Q95242	PECAM1	A0A287ALH4_PIG;A0A287AQG0_PIG;A0A287B901_PIG;A0A2C9F3C8_PIG;K7GNA9_PIG;K7GPI3_PIG;K7GS31_PIG;PECA1_PIG	Platelet endothelial cell adhesion molecule	7.24034e-06	0.0002	0.920741	17.3409	17.2597	17.0825	17.3991	17.0491	17.2671	17.3919	17.8113	17.6597	17.6033	17.6994	17.6063	16.8458	16.9205	17.128	16.6674	16.5666	16.9357	16.6967	16.7152	15.9962	17.4647	15.9924	17.3821
O46409	APOA4	APOA4_PIG	Apolipoprotein A-IV	9.25336e-06	0.00023	1.48167	18.7992	19.5292	19.0811	19.5931	19.5782	19.6872	19.4699	18.4489	19.4733	20.5932	19.2943	19.2893	19.0748	18.8284	19.8759	18.2159	18.9123	19.0292	18.1062	18.2359	17.8177	18.8098	18.2476	16.4617
A0A480K168;F8S329	NA	A0A480K168_PIG;F8S329_PIG	Endogenous retrovirus group S71 member 1 Env polyprotein-like;Env protein	1.04896e-05	0.00024	1.40085	14.186	13.486	13.4909	13.941	13.6696	13.8801	14.8776	15.103	15.4942	14.7183	15.5156	14.382	11.8093	13.3635	13.1397	13.2262	12.6455	13.2664	12.3921	13.4282	14.337	14.6279	13.1551	13.7452
K7GPT9	CFB	K7GPT9_PIG	Complement factor B	9.77297e-06	0.00024	-0.760686	21.5809	21.8979	21.9187	21.543	21.816	21.5087	22.3065	21.554	22.0498	22.3801	22.0705	21.9784	21.3772	21.4251	21.9541	21.9339	21.8414	21.7785	22.6948	22.4477	23.2131	22.3672	22.9817	23.1989
A0A287AP71;A0A5G2RAV3;F1SQL2	EFEMP1	A0A287AP71_PIG;A0A5G2RAV3_PIG;F1SQL2_PIG	EGF containing fibulin extracellular matrix protein 1	1.10009e-05	0.00025	0.655021	18.9847	18.9632	18.7373	18.8056	18.6961	18.9955	18.6662	18.5435	18.4069	18.8355	18.5829	18.6018	18.9336	18.9231	18.6531	18.337	18.6	18.6194	18.3189	18.3041	17.45	18.2672	17.8204	17.5461
A0A5G2QUE0	SERPINC1	A0A5G2QUE0_PIG	SERPIN domain-containing protein	2.07632e-05	0.00046	-0.472055	22.8146	22.6424	22.9389	22.6828	22.7556	22.7169	22.6989	22.2011	22.5166	22.6399	22.521	22.273	22.4548	22.4817	22.9247	22.7893	22.4806	22.5792	22.7777	22.5186	23.3564	22.795	23.0669	23.1684
I3LMU6	RCN3	I3LMU6_PIG	Reticulocalbin 3	2.34178e-05	0.0005	0.335596	17.8572	17.7495	17.871	17.6188	17.5921	17.8472	17.3971	17.8045	17.6404	17.7612	17.6721	17.5009	17.4722	17.7342	17.7761	17.4928	17.5356	17.6514	17.2779	17.2019	17.0787	17.4286	17.3263	17.4492
F1SJM0	PTX3	F1SJM0_PIG	Pentraxin-3	2.53759e-05	0.00053	1.82207	14.2383	14.9738	14.4679	15.0471	14.0792	14.0119	16.1494	17.9095	17.0323	16.5599	17.3175	15.4772	14.2009	13.4798	13.7697	13.8231	14.8002	13.9414	14.3088	16.28	14.5995	16.3473	13.1976	14.7801
A0A5G2QD63	COL9A1	A0A5G2QD63_PIG	Collagen type IX alpha 1 chain	3.63794e-05	0.00074	1.10765	15.1383	15.4308	15.0342	15.8733	15.1371	15.4114	15.5243	16.3084	16.2773	14.8774	16.4072	15.7087	16.022	15.0467	14.783	14.6807	14.5235	14.5967	14.0381	14.8819	15.0473	15.3598	14.7106	14.4196
F1RRN0	PTK7	F1RRN0_PIG	Protein tyrosine kinase 7 (inactive)	3.87924e-05	0.00075	0.631624	17.2149	16.5211	16.5832	16.7	16.8183	16.9596	16.6005	16.9848	17.0179	16.9066	16.8438	16.4039	16.4341	16.3649	16.1772	16.0472	16.1633	16.5783	15.8232	15.9664	15.981	16.4318	16.7083	16.057
A0A287AU22;A0A287B8K4	PLVAP	A0A287AU22_PIG;A0A287B8K4_PIG	Plasmalemma vesicle associated protein	3.78652e-05	0.00075	1.36622	14.8025	14.1995	14.6559	14.559	14.5141	14.8395	14.5036	15.6185	15.3958	14.8394	15.3677	14.5577	14.0752	13.3556	14.3069	13.7818	13.9172	14.3395	12.1729	12.8385	13.4887	14.9924	13.4975	15.0955
A0A286ZIC1	GSN	A0A286ZIC1_PIG	Gelsolin	4.00284e-05	0.00075	-1.95896	17.7233	17.2594	17.9007	17.594	17.4893	17.6379	16.9623	16.8426	17.0219	16.8757	16.2868	16.6441	17.335	18.2816	18.2926	18.2081	17.8405	18.3374	17.5954	17.1869	19.6663	17.472	20.3102	20.1564
A0A287BP22;A0A5G2QC98	FSTL1	A0A287BP22_PIG;A0A5G2QC98_PIG	Follistatin like 1	4.30139e-05	0.00079	0.894107	16.7907	17.0146	16.6233	16.7434	16.6246	16.8663	17.3714	18.1877	17.0259	17.3063	17.6787	17.2147	16.4005	15.912	16.5205	16.3571	16.2757	16.6288	16.5916	16.9581	16.2466	17.3671	16.1657	16.0908
F6Q194	FGL2	F6Q194_PIG	Fibroleukin	5.54781e-05	0.00099	1.15558	15.1764	15.0108	14.7058	15.4627	14.7744	16.0068	14.8641	15.7053	15.0186	15.3891	15.4749	14.5275	15.4871	15.0701	14.7576	14.4018	14.4436	14.8719	14.2916	14.5001	13.5581	14.7876	13.2914	13.6172
F1RUM1	AFM	F1RUM1_PIG	Afamin	6.57908e-05	0.00115	-0.983558	22.5178	23.3383	23.4432	22.3141	23.0408	22.0925	23.1077	22.8084	22.4964	22.9863	22.1758	22.6089	21.9766	22.4883	23.4475	23.2556	22.807	23.2417	23.3671	23.2127	24.3971	23.1263	24.1212	23.8605
P18650	APOE	APOE_PIG	Apolipoprotein E	6.8381e-05	0.00117	-0.936658	21.9839	21.4345	21.5425	21.7315	21.3433	22.2882	21.1342	21.2613	21.5624	21.1683	20.9714	20.717	23.2861	23.0918	22.8344	23.2916	22.9522	23.1096	22.7355	22.1857	21.8401	22.6073	21.9816	21.0845
A6ZIC9	IGFBP6	A6ZIC9_PIG	Insulin-like growth factor-binding protein 6	7.17634e-05	0.0012	1.20088	16.6095	16.3026	16.1341	15.9772	16.1279	16.3168	16.3357	17.4846	16.2224	16.8475	16.9696	17.2846	15.8693	16.0813	15.7128	15.7146	15.8839	15.292	16.0443	16.8237	14.9466	16.0079	15.0071	15.1095
F1S0Y1	HMCN2	F1S0Y1_PIG	Hemicentin 2	7.50584e-05	0.00123	0.674305	16.6717	16.1197	16.2012	16.7558	16.0096	16.8802	15.6889	16.1906	16.6974	15.9429	16.5377	15.4356	16.0716	16.1753	15.9696	15.247	15.1972	15.3169	14.8827	15.0579	15.8239	15.4906	15.5125	15.6796
A0A287AT18	PSMA7	A0A287AT18_PIG	Proteasome subunit alpha type	8.45663e-05	0.00136	1.7935	14.9635	14.4751	13.7252	14.4281	13.8977	15.6982	13.7634	15.6969	14.6733	14.5622	15.0159	14.3149	15.0605	14.1501	14.0949	13.9293	14.2652	14.1888	13.6181	13.9537	11.7137	14.0306	12.1867	11.7631
A0A286ZPV9;A0A287A3N5;A0A287A5A5;A0A287AIH7;A0A287ALX2;A0A287AQB1;A0A287BHG0;F1SAE8	NRCAM	A0A286ZPV9_PIG;A0A287A3N5_PIG;A0A287A5A5_PIG;A0A287AIH7_PIG;A0A287ALX2_PIG;A0A287AQB1_PIG;A0A287BHG0_PIG;F1SAE8_PIG	Neuronal cell adhesion molecule	9.50445e-05	0.00149	0.26099	16.2153	15.7686	15.7424	16.0486	15.6988	15.6817	15.7991	15.763	16.3622	15.945	15.9009	15.7079	15.7755	15.818	15.4905	15.6985	15.6119	15.5298	15.2473	15.6343	15.8059	15.7916	15.9513	15.4818
A0A287BG16	B4GALT1	A0A287BG16_PIG	Beta-1,4-galactosyltransferase 1	0.000128042	0.00193	0.481291	16.3873	16.4501	16.3819	16.4181	16.4492	16.6224	16.5084	16.6646	16.1366	16.5151	16.6865	16.3026	16.0341	16.0228	16.366	15.8135	15.8415	16.1671	15.9068	16.1211	16.1432	16.1439	15.8607	15.7501
A0A286ZRX6;F1RHK7	PEAR1	A0A286ZRX6_PIG;F1RHK7_PIG	Platelet endothelial aggregation receptor 1	0.000126374	0.00193	0.637443	16.3312	16.37	16.0109	16.201	15.9676	15.9681	16.0485	15.5486	16.3934	16.3072	15.8795	16.0033	16.101	16.1936	15.8741	15.478	16.1575	15.8033	15.454	15.4266	14.8837	15.9268	15.3898	15.2749
A0A286ZKC5;A0A286ZR68;A0A287A9T4;A0A287BDM6;A0A287BK26;F1RQU2	HSP90AB1	A0A286ZKC5_PIG;A0A286ZR68_PIG;A0A287A9T4_PIG;A0A287BDM6_PIG;A0A287BK26_PIG;F1RQU2_PIG	Heat shock protein 90 alpha family class B member 1	0.000150006	0.00222	1.52872	15.9548	15.6125	15.7862	15.8774	15.2952	17.5794	15.7141	16.8584	16.5016	15.7094	16.8109	15.6934	15.6281	15.7349	15.6607	15.3081	15.7418	15.2886	15.441	15.0856	13.4365	16.0224	13.9882	14.1419
F1RPW2	F5	F1RPW2_PIG	Coagulation factor V	0.000154966	0.00225	-0.915579	16.3417	16.3013	16.8966	16.3416	16.4297	15.0902	16.0629	15.0931	15.6059	15.067	16.0925	15.861	17.1203	17.5017	17.2077	17.274	16.6383	16.6894	17.2437	16.4368	16.3646	16.3182	16.5037	16.4089
A0A287BIL8	HSPA5	A0A287BIL8_PIG	Endoplasmic reticulum chaperone BiP	0.000166886	0.00229	1.2801	16.5473	16.7669	16.3052	17.0217	16.1115	17.2572	16.1688	17.1717	16.3238	16.6051	16.6356	17.123	15.6002	15.3169	16.0699	15.0087	15.1955	15.6887	15.7665	16.1331	13.9019	16.2403	15.2519	15.0537
F1RW71	MMRN1	F1RW71_PIG	Multimerin 1	0.000166241	0.00229	1.18036	15.2698	15.3702	15.4207	15.2246	15.6185	15.4008	15.7692	16.4702	15.9334	16.5274	16.1768	15.9008	13.4654	15.0733	15.3444	14.6044	14.3949	14.8284	14.436	15.3113	14.7614	16.0518	14.3859	14.7493
A0A5G2QGW8;A0A5G2R0H3;F6Q5E9	DKK3	A0A5G2QGW8_PIG;A0A5G2R0H3_PIG;F6Q5E9_PIG	Dickkopf WNT signaling pathway inhibitor 3	0.000166013	0.00229	0.884666	16.3495	16.2937	16.0242	16.4247	15.9783	16.1224	16.1459	16.613	15.863	16.0256	16.9386	15.6673	16.1331	15.9609	16.0447	15.3135	15.7109	15.9843	15.3811	15.5165	15.0946	15.9076	14.4695	15.5762
F1RWA3;G9K122;K7GPB4	MRC1	F1RWA3_PIG;G9K122_PIG;K7GPB4_PIG	Uncharacterized protein;Macrophage mannose receptor 1;Uncharacterized protein	0.000172801	0.00233	0.985231	15.9543	16.0009	15.591	16.013	15.6943	16.5982	16.1273	17.8703	17.0528	16.8637	17.2555	17.1823	15.7658	15.1286	15.3003	15.4804	15.4888	15.1126	15.9148	16.4864	15.7898	17.097	15.3112	15.8416
A0A5G2QN76	CD44	A0A5G2QN76_PIG	CD44 molecule (Indian blood group)	0.000177675	0.00236	0.505406	17.1112	17.3458	17.1269	17.4523	17.2208	17.0943	17.2426	17.3259	17.3265	17.142	17.1919	17.2576	17.0621	16.6528	16.9713	16.7008	16.8109	17.0528	16.8649	16.8517	16.6742	17.3053	16.1931	16.5649
A0A5G2QEJ2	NA	A0A5G2QEJ2_PIG	Collagen IV NC1 domain-containing protein	0.000203458	0.00266	2.16448	15.0768	15.5668	14.2343	14.7929	13.3015	14.9288	14.7063	15.8189	15.3039	15.3952	16.2023	15.0235	13.5814	14.1956	14.2366	15.06	13.5906	14.272	14.3418	14.502	12.0712	15.0767	11.6011	11.8704
A0A481BCM9	APOA2	A0A481BCM9_PIG	Apolipoprotein A-II preproprotein	0.000225068	0.00284	-1.00505	21.8316	21.5902	21.9446	21.9892	21.7441	21.2641	21.8104	21.1297	21.6756	21.7324	21.6296	21.296	22.269	22.4756	22.7527	22.5287	22.3256	22.1885	22.0162	21.8442	23.9604	21.8592	22.5147	23.1093
A0A286ZSR6;A0A286ZU24;A0A287A0Q2;A0A287ACL1;F1RJF7	SDF4	A0A286ZSR6_PIG;A0A286ZU24_PIG;A0A287A0Q2_PIG;A0A287ACL1_PIG;F1RJF7_PIG	Stromal cell derived factor 4;Stromal cell derived factor 4;Stromal cell derived factor 4;45 kDa calcium-binding protein isoform 2;Stromal cell derived factor 4	0.000222299	0.00284	1.31108	14.6974	13.6901	13.4328	13.2868	13.8829	14.1164	14.7771	15.512	13.9284	14.6626	15.5765	15.4745	13.6732	12.5759	13.6816	13.6279	13.6026	12.5447	13.5836	13.9597	13.2913	14.7395	13.2968	13.1936
A0A287BSC3;A0A480UBK2	ALPL	A0A287BSC3_PIG;A0A480UBK2_PIG	Alkaline phosphatase	0.000239949	0.00293	0.846892	16.0308	16.2369	15.4454	16.2871	15.9917	15.7059	16.1935	16.1357	15.9885	16.3112	16.0147	16.456	15.2708	15.2097	15.2297	15.1172	15.303	15.1419	15.5531	15.4764	14.9307	16.2793	14.4271	15.3515
A0A0H5ANC0	OGN	A0A0H5ANC0_PIG	Osteoglycin	0.000237971	0.00293	0.503968	17.9397	17.6428	17.4328	17.343	17.3054	17.4536	17.7095	18.0204	17.907	17.5711	18.1875	17.8804	17.4663	17.3898	17.4327	17.6156	17.6897	17.5682	17.2983	17.4396	17.2062	17.9108	17.0876	17.3096
A0A287BLU7;A0A288CG53;A0A5G2QWH2;A0A5G2QYA4;A0A5G2R8N1	SELL	A0A287BLU7_PIG;A0A288CG53_PIG;A0A5G2QWH2_PIG;A0A5G2QYA4_PIG;A0A5G2R8N1_PIG	L-selectin;Selectin L;Selectin L;L-selectin;L-selectin	0.000257607	0.0031	0.630542	16.0586	16.4842	15.828	16.1958	15.8918	16.2557	16.3058	15.8111	16.4222	16.3283	15.9036	16.901	16.2392	15.8011	15.6431	15.7604	15.9029	15.5703	15.9281	16.0104	15.0729	16.1508	16.0001	14.7264
A0A5G2R9R4;F1SUA0	FBLN7	A0A5G2R9R4_PIG;F1SUA0_PIG	Fibulin 7	0.000268108	0.00318	0.763298	15.4021	14.9011	14.8097	15.2671	14.9108	15.3792	15.2467	16.1451	15.2919	15.0198	15.9954	15.0066	14.9466	14.8193	14.9837	14.3589	14.3437	14.8911	14.6048	14.654	14.2562	14.943	14.9056	14.7621
F1RU34	CST6	F1RU34_PIG	Cystatin E/M	0.000279436	0.00326	1.00636	16.9531	15.899	16.0924	16.0982	15.709	16.7729	17.1594	17.8325	16.1097	16.9582	17.396	16.6281	15.6491	16.0379	16.0094	15.4445	15.7294	15.5779	15.5001	15.9312	16.1309	16.3566	15.9991	16.1277
A0A286ZHY0;A0A480VGP1;A0A5G2QW73;F1SV99;I3LHV9;I3LNH0	COL16A1	A0A286ZHY0_PIG;A0A480VGP1_PIG;A0A5G2QW73_PIG;F1SV99_PIG;I3LHV9_PIG;I3LNH0_PIG	Collagen type XVI alpha 1 chain;Collagen alpha-1(XVI) chain;Collagen type XVI alpha 1 chain;Collagen type XVI alpha 1 chain;Collagen type XVI alpha 1 chain;Collagen type XVI alpha 1 chain	0.000309202	0.00348	0.851425	15.7527	15.0988	14.7476	15.7318	14.8189	15.5137	15.1333	15.9	15.3199	14.9559	16.0954	15.3164	15.1982	15.1709	14.9981	14.7148	14.4255	14.7243	13.8335	14.8243	14.4111	15.1978	14.5387	14.8069
A0A286ZVG0;A0A287A0D2	PSAP	A0A286ZVG0_PIG;A0A287A0D2_PIG	Saposin-B-Val;Prosaposin	0.000306112	0.00348	0.860618	15.3753	14.9869	15.0252	15.2549	14.8727	15.7352	15.2125	15.9911	15.4099	16.1718	15.8909	16.16	15.1675	15.4114	15.0583	14.9788	14.8201	14.8862	15.0865	15.3924	14.1825	15.6401	14.9136	14.4574
F1SH96	ITIH1	F1SH96_PIG	Inter-alpha-trypsin inhibitor heavy chain H1	0.000311593	0.00348	-0.904098	18.0785	18.8526	19.4257	18.956	19.0751	16.993	18.7116	18.0956	17.3888	18.3921	17.9219	17.532	18.394	18.5836	19.1157	19.2103	19.258	18.8931	19.0186	18.9115	19.3349	18.7032	18.8145	18.6839
I3LK29	LCAT	I3LK29_PIG	Phosphatidylcholine-sterol acyltransferase	0.000342088	0.00376	-0.530616	16.2811	16.3281	16.8959	16.5553	16.8712	16.6974	16.5133	15.9626	16.6129	16.3945	15.9017	16.5747	16.8883	16.9617	16.9091	17.2268	16.7507	16.845	17.1102	17.0148	16.9233	16.7536	16.6195	16.722
P04366	AMBP	AMBP_PIG	Protein AMBP (Fragment)	0.00036179	0.00392	-0.260447	22.8883	22.3244	22.9473	22.7041	22.8905	22.4782	22.1205	22.3235	21.8885	22.4719	22.1518	21.7958	22.9862	22.899	23.084	22.6217	22.9076	22.9285	22.5854	22.4262	22.2289	22.3282	22.2096	22.5362
Q9GLP1	F5	FA5_PIG	Coagulation factor V	0.000369234	0.00394	-0.782754	17.2312	17.453	17.9502	17.4384	17.6197	17.0179	16.9671	16.0176	16.7255	17.3784	16.7126	16.7059	18.0778	18.1572	17.9676	18.3562	17.7355	17.7728	18.2459	17.4455	17.2403	17.1409	17.4151	17.7159
F1RRU7	MRC2	F1RRU7_PIG	Mannose receptor C type 2	0.000373383	0.00394	0.883543	17.3282	16.9473	16.561	17.482	16.9715	17.4308	16.7036	17.3909	17.3284	17.1644	17.54	16.5062	16.7393	16.3902	16.5815	16.4513	16.455	17.0702	16.3099	16.2512	16.8926	16.8399	15.5604	15.4782
F6QA08	PDIA3	F6QA08_PIG	Protein disulfide-isomerase	0.000394296	0.0041	0.925741	15.1153	15.1657	14.4969	15.1135	14.3127	15.6573	14.1568	15.6001	14.7881	14.2753	14.8954	14.5022	14.4609	14.1299	13.937	13.8203	13.8597	14.1302	13.7479	14.0764	13.9907	14.1663	13.1413	13.5409
I3LB93	NOTCH3	I3LB93_PIG	Notch receptor 3	0.000409899	0.00421	0.448943	16.0693	16.1438	15.4264	15.8392	15.6685	15.7486	15.4476	15.2707	15.9657	15.6601	15.719	15.5231	16.0639	15.8269	15.0308	15.4958	15.7027	15.3652	15.2345	15.1311	15.9715	15.1226	14.3971	15.0357
A0A287BN06	PZP	A0A287BN06_PIG	Uncharacterized protein	0.000467702	0.00474	-0.86282	21.058	22.0968	21.4076	21.4221	21.7848	21.6641	21.4002	20.6835	21.443	21.3412	21.239	21.4062	22.6411	21.8021	21.6699	22.3661	22.2257	21.7885	22.7458	22.5805	21.9009	21.6459	21.8441	21.9729
F1SCE6;I3LMU0	SERPINA11	F1SCE6_PIG;I3LMU0_PIG	Serpin family A member 11	0.000490393	0.00484	-1.642	13.0397	10.2697	13.693	11.6129	13.1722	13.429	12.9201	12.9097	13.5651	12.3372	13.4586	13.2475	14.8704	15.1172	14.8864	15.3558	15.2368	15.1076	14.9541	15.5097	14.4843	14.5862	14.3093	14.4467
A0A287ANZ8;A0A287B2P9;B9ZSM8	THY1	A0A287ANZ8_PIG;A0A287B2P9_PIG;B9ZSM8_PIG	Thy-1 cell surface antigen;Thy-1 cell surface antigen;CD90 protein	0.000485164	0.00484	0.804638	16.7428	16.0072	15.4599	15.8491	15.8741	16.1256	16.0564	16.9465	16.5286	16.4969	16.7744	16.6484	15.9594	14.7538	15.269	15.3769	15.9445	15.7321	15.5298	16.1573	15.605	16.2035	15.4937	15.634
A0A286ZIL9;A0A5G2R4W0	COL18A1	A0A286ZIL9_PIG;A0A5G2R4W0_PIG	Collagen type XVIII alpha 1 chain	0.000497404	0.00485	0.866413	16.1692	15.6022	15.7026	15.8393	15.4669	16.0855	16.4948	16.9422	16.4812	16.1373	17.3861	16.7053	15.5279	15.9973	15.7151	15.9713	15.5071	15.665	15.6066	15.9835	15.3449	16.9619	15.6793	15.3722
F1SFA7	COL1A2	F1SFA7_PIG	Fibrillar collagen NC1 domain-containing protein	0.000559948	0.00539	1.31821	19.0261	18.6156	18.0405	19.875	18.4491	19.2652	19.1014	20.2955	19.0882	19.8877	19.2417	18.5519	18.3271	17.4284	17.8353	17.8779	17.6752	18.1979	16.7133	17.5696	19.5616	17.3734	19.0818	17.9576
F1RWV2;P35624	TIMP1	F1RWV2_PIG;TIMP1_PIG	Metalloproteinase inhibitor 1	0.000599503	0.0057	1.00897	16.0472	15.9763	16.183	16.2583	16.008	16.658	18.1259	18.6786	18.0149	18.1931	18.6138	18.0054	15.7021	15.3427	15.9278	15.5855	15.365	15.8253	16.6456	17.8497	16.4435	18.8275	17.3889	16.4225
A0A287ALS5;A0A287AW54;A0A5G2R1A1;F1SH32	GOLIM4	A0A287ALS5_PIG;A0A287AW54_PIG;A0A5G2R1A1_PIG;F1SH32_PIG	Golgi integral membrane protein 4	0.000690204	0.00648	0.873552	13.8069	14.3585	13.8846	14.1957	13.6349	14.5106	14.5626	14.8	14.1883	14.0494	14.7852	14.1484	13.9756	14.209	14.1486	13.8368	13.4934	13.3281	13.2526	14.0237	12.626	14.3345	13.9262	13.1295
A0A286ZRH3;I3LD22	COCH	A0A286ZRH3_PIG;I3LD22_PIG	Cochlin	0.000701312	0.00651	0.983834	15.9693	15.2826	14.7488	15.257	15.1592	15.9088	16.1061	17.0304	15.4475	15.5901	16.2923	16.3932	15.2489	15.2596	15.5836	14.6776	14.9152	14.8286	14.5646	15.4241	15.0308	15.6835	15.031	15.2225
F1S795	ROBO4	F1S795_PIG	Roundabout guidance receptor 4	0.000713325	0.00654	0.847565	16.6762	16.6001	16.087	17.0446	16.5975	16.6754	16.8076	16.7261	17.2715	16.9071	17.5122	16.5907	16.7848	16.2381	16.473	16.342	16.0556	16.604	16.0273	16.3764	16.1711	17.2028	15.8265	15.1258
A0A287AR98;A0A5G2QV81	SBSN	A0A287AR98_PIG;A0A5G2QV81_PIG	Suprabasin	0.000762231	0.0069	0.666191	15.9211	15.8997	15.5696	16.0288	15.733	16.0773	15.4995	16.0763	15.4187	15.9613	15.5642	15.7559	16.0751	16.1837	15.5836	15.4072	15.4544	15.4791	15.4889	15.2317	14.93	15.3453	14.8688	14.4139
A0A286ZTE6;A0A287B2N2;A0A288CFW6;A0A288CFW8;P79307	APP	A0A286ZTE6_PIG;A0A287B2N2_PIG;A0A288CFW6_PIG;A0A288CFW8_PIG;A4_PIG	Amyloid-beta A4 protein	0.000815997	0.00731	2.50956	9.47934	10.6721	11.6444	11.1572	11.7983	10.8828	12.2147	14.3294	11.7394	12.5006	14.1395	15.9479	10.9285	11.5891	10.7636	10.0564	8.18603	11.6362	9.79196	11.1787	10.7346	11.81	10.7846	11.5143
A0A5G2QK84;A0A5G2QKI7;A0A5G2QLL7;A0A5G2R957;F1SR53	ITGA5	A0A5G2QK84_PIG;A0A5G2QKI7_PIG;A0A5G2QLL7_PIG;A0A5G2R957_PIG;F1SR53_PIG	Integrin subunit alpha 5;Integrin subunit alpha 5;Integrin subunit alpha 5;Integrin subunit alpha 5;Integrin alpha-5	0.000932066	0.00825	0.470043	14.8047	14.8471	14.7081	15.1027	15.2075	14.9087	14.9607	15.0916	15.3207	15.1417	15.2205	14.7719	14.8213	14.1926	14.7517	14.5841	14.591	15.234	14.551	14.743	14.6824	14.7098	14.8	14.2004
A0A287AXI8	FSTL3	A0A287AXI8_PIG	Follistatin like 3	0.000954717	0.00835	1.55141	14.0845	13.3968	13.2689	13.4513	13.3857	14.2039	14.6405	15.7168	14.8046	14.5798	15.3744	14.9229	13.3519	12.7882	13.6911	12.7599	12.3436	12.7891	13.7308	14.7148	11.072	14.4106	13.6718	13.1305
A0A287B490	OAF	A0A287B490_PIG	Uncharacterized protein	0.00103516	0.00896	1.64141	16.6325	15.9946	16.4711	16.3004	16.2094	16.2703	16.3124	16.8281	15.9199	17.0329	16.3631	16.8534	15.4641	15.3661	15.9951	15.5704	15.7952	15.4591	15.7638	16.5846	12.8946	15.9252	14.9388	13.3544
P26234	VCL	VINC_PIG	Vinculin	0.00116581	0.00966	0.949788	17.0981	16.7338	16.4899	16.8839	16.6072	18.266	16.7524	18.1174	17.429	16.889	17.0306	16.4129	16.4269	16.6411	16.6306	16.2275	16.2342	16.6202	16.2372	16.2913	15.6345	16.5798	16.0468	16.143
A0A287B863;F1SKR0	ACAN	A0A287B863_PIG;F1SKR0_PIG	Aggrecan core protein	0.00117982	0.00966	1.00262	16.3436	17.3231	16.6851	16.9003	16.8291	16.2599	17.6217	18.4303	19.1931	16.8573	18.9028	17.6224	17.1577	16.3289	16.5352	16.4927	16.5839	16.1883	16.6097	16.8858	17.1202	17.9371	16.9202	17.1388
Q0Z8R0	CST3	Q0Z8R0_PIG	Cystatin C	0.00115762	0.00966	1.25788	19.2478	18.9434	18.4666	18.0504	18.7494	18.6514	19.3147	19.6738	18.8915	18.7359	19.6684	19.4027	18.2466	18.2442	18.5641	18.3745	18.6316	18.604	18.5348	18.9796	16.2402	18.9143	17.8387	17.632
F1SQ09	LUM	F1SQ09_PIG	Lumican	0.00116791	0.00966	0.674856	21.293	21.3026	20.936	21.4501	21.4169	21.0954	21.103	21.7282	21.1848	21.3986	21.3887	21.3352	21.1853	20.6971	21.0982	20.8329	21.0529	21.2883	21.0172	20.8541	19.8516	21.1151	20.4311	20.8203
A0A5G2QYC6;A0A5S6GBZ7;A0A5S6H4P7;P35750	CAPN1	A0A5G2QYC6_PIG;A0A5S6GBZ7_PIG;A0A5S6H4P7_PIG;CAN1_PIG	Calpain-1 catalytic subunit	0.00116013	0.00966	1.36587	13.8711	13.9833	13.3294	14.0175	13.4266	14.8447	13.7246	15.0021	14.4976	14.3246	14.404	13.6375	14.7138	13.5402	13.4748	13.5177	12.9112	13.9449	13.5854	13.4865	12.0184	14.1039	11.8345	12.3664
A0A287AS68;A0A5G2QR79;Q29042	FCN1	A0A287AS68_PIG;A0A5G2QR79_PIG;FCN1_PIG	Ficolin-1	0.00123987	0.01005	2.11542	16.1369	14.2137	14.1863	12.6367	13.4397	15.5656	18.11	14.932	14.8815	16.7393	16.9087	15.4322	13.0751	14.3418	13.6302	13.0814	14.1688	13.7493	13.5139	14.0812	14.0366	15.5373	13.4195	13.7227
I3LQ84	COL6A2	I3LQ84_PIG	Collagen type VI alpha 2 chain	0.00125495	0.01007	0.757208	16.2144	16.4124	16.3831	16.4293	16.2022	16.1356	16.192	17.4591	15.8987	16.2644	16.8044	15.9462	16.3367	15.7231	15.7068	15.8624	16.3572	16.2654	15.2485	15.4004	16.0593	16.0333	15.7826	15.4972
O18831	MSTN	GDF8_PIG	Growth/differentiation factor 8	0.00139985	0.01091	-0.343352	14.6167	15.0634	15.4428	15.5123	15.7885	14.2654	14.3677	14.7496	13.5911	14.109	14.288	13.0691	14.0565	13.3295	14.7228	14.6816	14.5119	15.0777	14.3117	13.7904	14.0717	14.4054	14.8888	14.7667
A0A287BEY3	LOC100624077	A0A287BEY3_PIG	Endogenous retrovirus group V member 2 Env polyprotein	0.00140281	0.01091	-0.752988	17.569	18.0536	17.5035	17.9948	17.552	18.0896	15.7344	16.4351	15.6913	16.7007	16.1237	15.8384	18.2672	17.5405	18.0826	17.822	17.4232	17.8386	16.9961	16.8391	17.2066	16.0224	16.8577	17.1196
A0A286ZFW3	APOH	A0A286ZFW3_PIG	Apolipoprotein H	0.00138532	0.01091	-0.405769	22.7522	22.8106	22.5862	22.3075	22.7061	22.3179	22.4408	21.8017	22.2916	22.3743	22.1713	22.0508	22.0948	22.4342	22.6782	22.7672	22.3433	22.6757	22.8526	22.3182	22.7748	22.5175	22.3793	22.7227
A0A286ZQ00	LOC100515857	A0A286ZQ00_PIG	C-C motif chemokine	0.00142366	0.01096	-1.79403	12.5509	9.42758	11.8362	11.7857	11.9423	12.8862	13.1014	13.414	11.594	11.3765	13.7156	11.8694	14.3688	14.1211	14.5274	14.2077	14.3859	14.0074	13.6228	13.6624	14.7004	13.8993	14.3401	15.6101
F1REZ2;I3LFP3;K7GLS1	VCAN	F1REZ2_PIG;I3LFP3_PIG;K7GLS1_PIG	Versican	0.0015034	0.01146	2.4149	16.0829	13.5531	12.2682	13.6838	13.015	13.104	14.5391	17.0405	16.263	14.6316	17.1236	15.4466	14.1557	12.8802	13.6808	15.7444	13.1122	13.1222	13.1508	14.7382	12.2157	15.5366	12.9021	12.0116
A0A287B1L8	NOTCH1	A0A287B1L8_PIG	Neurogenic locus notch homolog protein 1 preproprotein	0.00152229	0.01149	0.601668	16.7797	16.8142	16.6877	16.5982	16.8499	16.2794	16.858	16.7854	16.8934	16.8656	16.7361	16.5157	16.3798	16.3263	16.4068	16.5036	16.4697	16.4174	16.2551	16.5548	15.5153	16.5913	16.6338	15.4939
A0A5G2QZJ2;A0A5G2R5B2;F1ST89	RECK	A0A5G2QZJ2_PIG;A0A5G2R5B2_PIG;F1ST89_PIG	Reversion inducing cysteine rich protein with kazal motifs	0.00154589	0.01156	-0.644981	20.0299	20.038	20.2987	19.9308	20.2682	20.0016	19.9285	19.4145	18.5159	20.3683	19.826	19.9028	20.1254	20.2266	20.1215	20.2728	20.4021	20.3613	20.5972	20.4379	20.0325	20.3041	20.4239	20.0305
A0A287AT81;F1SL34;K7GLE8	ALCAM	A0A287AT81_PIG;F1SL34_PIG;K7GLE8_PIG	Activated leukocyte cell adhesion molecule	0.00168347	0.01246	0.452113	16.0464	16.0748	15.9318	15.8317	15.814	15.9958	15.7104	15.944	15.8556	15.7836	15.4443	15.877	15.7675	15.8201	15.6072	15.3263	15.6043	14.9427	15.4155	15.3672	14.9355	15.7324	15.093	15.3587
A0A287A1V5;A0A287BFY0	ALDOA	A0A287A1V5_PIG;A0A287BFY0_PIG	Fructose-bisphosphate aldolase	0.00173681	0.01274	1.13818	15.9977	15.1268	15.0379	15.5459	14.7496	16.4612	14.8585	16.8305	15.8777	14.7419	15.7098	14.9725	15.1471	14.8314	15.2304	15.0079	14.7356	15.361	14.9102	13.8703	14.2876	13.8051	14.6196	14.6691
F1SR05;P00336	LDHB	F1SR05_PIG;LDHB_PIG	L-lactate dehydrogenase;L-lactate dehydrogenase B chain	0.00177604	0.0129	1.10633	17.1511	16.4334	16.4243	16.6671	15.9723	17.8792	15.928	18.2487	17.1645	16.3868	16.9737	16.4691	16.9869	16.4441	15.9595	15.9542	16.0901	16.1143	15.9961	15.7762	15.4094	16.1429	15.6813	15.5268
A0A287BRF1	LOC110258309	A0A287BRF1_PIG	C1q domain-containing protein	0.00184407	0.01315	2.96566	17.1694	12.0193	9.79201	10.3306	15.821	11.1969	13.2372	11.6973	18.3115	10.1389	11.3635	18.2382	11.1001	17.58	5.10195	13.3571	10.6395	10.4886	12.0027	9.76773	11.1357	9.35011	10.5876	12.3488
A0A287ANS6;A0A287B0L6;A0A287B959;A0A287BFK0;A0A480JJE7;A0A5G2QJ24;A0A5G2QMX0;A0A5G2QQP3;A0A5G2R318;A0A5G2R9I5;A0A5G2RBH4;A0A5G2RFB8;A0A5G2RMV0;B1PEY3;F1RPL1;F2Z587;F2Z5L2;F2Z5L5;F2Z5L6	H2AFJ;HIST1H2AH;HIST1H2AC;HIST3H2A;HIST1H2AC;H2AFV;H2AFX;;H2AFV;H2AFV;H2AFV;;HIST1H2AA;H2A.Z;LOC100154071;LOC100158121;LOC102159655;HIST2H2AC;HIST2H2AB	A0A287ANS6_PIG;A0A287B0L6_PIG;A0A287B959_PIG;A0A287BFK0_PIG;A0A480JJE7_PIG;A0A5G2QJ24_PIG;A0A5G2QMX0_PIG;A0A5G2QQP3_PIG;A0A5G2R318_PIG;A0A5G2R9I5_PIG;A0A5G2RBH4_PIG;A0A5G2RFB8_PIG;A0A5G2RMV0_PIG;B1PEY3_PIG;F1RPL1_PIG;F2Z587_PIG;F2Z5L2_PIG;F2Z5L5_PIG;F2Z5L6_PIG	Histone H2A	0.00182784	0.01315	2.84371	15.6867	15.0299	14.025	16.1078	13.531	16.9212	14.6877	19.692	15.8834	14.4972	16.936	14.7624	14.5538	14.6419	14.5843	15.2447	14.7696	14.3158	13.7758	13.1935	12.0861	16.2436	12.7856	11.3118
F1S567	VCAM1	F1S567_PIG	Uncharacterized protein	0.00194989	0.01377	0.653484	16.936	16.8431	16.6842	15.9185	16.6564	16.7624	17.9436	17.3397	17.3901	17.818	17.9125	17.8678	16.6736	15.8429	16.6635	16.426	16.6492	16.3722	17.185	17.14	16.8837	17.694	16.563	16.8851
A0A287A5G1;A0A287AA77;A0A287AAR4;A0A5G2QZX1;I3LVD5;Q6QAQ1	ACTG1;ACTG1;ACTB;ACTG1;ACTG1;ACTB	A0A287A5G1_PIG;A0A287AA77_PIG;A0A287AAR4_PIG;A0A5G2QZX1_PIG;I3LVD5_PIG;ACTB_PIG	Actin gamma 1;Actin gamma 1;Actin, cytoplasmic 1;Actin gamma 1;Actin gamma 1;Actin, cytoplasmic 1	0.00196759	0.01377	1.69434	18.0756	17.7967	17.1278	18.2099	17.4092	19.9555	18.484	19.4582	19.1417	17.3608	19.2446	18.0252	17.8457	17.8107	18.5253	17.7639	17.5997	18.3305	17.0988	17.7069	15.5971	18.7414	16.5319	15.8723
A0A286ZVT6;A0A287AHD5;A0A5G2RF91;F1RIP6	NUCB1	A0A286ZVT6_PIG;A0A287AHD5_PIG;A0A5G2RF91_PIG;F1RIP6_PIG	Nucleobindin 1	0.00199692	0.01385	2.05415	14.7209	14.7132	13.9151	14.5555	14.3521	14.9343	16.7119	18.2397	16.4511	14.8749	18.0066	16.4185	15.345	14.3349	13.8958	14.0403	13.7891	14.3721	14.4334	14.6846	12.6581	17.3371	14.7415	14.5231
I3LU13	CHST3	I3LU13_PIG	Sulfotransferase	0.00205744	0.0139	0.743223	15.4045	15.6024	15.386	15.7233	15.3396	15.3284	15.3627	15.0378	15.3823	15.5402	15.2279	15.2615	15.5324	15.0945	14.8202	14.7024	14.8757	15.1073	14.9425	14.8825	14.7752	15.0323	13.3046	14.416
F1SIC9	LOXL1	F1SIC9_PIG	Lysyl oxidase homolog	0.00207548	0.0139	0.748843	13.9643	13.5246	13.1288	14.4877	13.3432	14.4642	13.7446	13.7685	13.7024	13.0242	14.226	14.1492	13.6562	13.5978	13.0302	13.1399	13.4374	12.8875	11.327	12.7617	13.8809	13.398	13.575	13.1791
A0A287A4Q7;A0A287A7I2;A0A287AA30;A0A287BAZ5;A0A287BQV2;F1RI39	ACTN4	A0A287A4Q7_PIG;A0A287A7I2_PIG;A0A287AA30_PIG;A0A287BAZ5_PIG;A0A287BQV2_PIG;F1RI39_PIG	Actinin alpha 4	0.00206144	0.0139	2.33283	9.16238	11.7469	12.0714	12.1113	10.2564	14.5282	12.8704	15.7566	13.7012	11.5832	14.161	11.7919	12.334	11.4624	11.5566	11.5953	11.6978	10.577	11.3891	12.0965	8.76554	11.9245	10.3448	11.3468
A0A287A688;A0A287AW61;A0A5G2QR59;A0A5G2QWM0;A0A5G2RBW0;F1SPM5	ANTXR1	A0A287A688_PIG;A0A287AW61_PIG;A0A5G2QR59_PIG;A0A5G2QWM0_PIG;A0A5G2RBW0_PIG;F1SPM5_PIG	ANTXR cell adhesion molecule 1	0.00206283	0.0139	-1.05625	9.48733	13.8647	14.1974	11.4424	14.1827	13.075	14.0875	13.9077	11.0359	13.7894	14.2437	7.23212	13.7938	10.1416	13.8299	13.1739	13.1598	14.3343	14.0274	14.0125	13.2172	12.9614	13.1483	13.2673
P79403	GANAB	GANAB_PIG	Neutral alpha-glucosidase AB	0.00214815	0.01402	1.57914	14.0066	14.937	13.449	14.7412	13.585	14.421	11.7568	14.7916	13.5123	14.3493	14.0799	12.9106	12.9443	12.8471	12.7545	12.0398	12.4251	12.0628	11.4792	13.7532	10.4456	11.3993	11.6663	13.1821
P04404	CHGA	CMGA_PIG	Chromogranin-A (Fragment)	0.00213697	0.01402	1.98507	15.7259	15.0147	15.8377	15.7538	16.2261	16.7183	17.7334	18.4463	17.1885	17.253	18.4582	17.4193	15.2091	15.3032	16.4087	15.2993	15.8212	15.8724	15.7359	16.937	14.2731	18.8142	13.7497	15.0784
A0A5G2Q7F8	NA	A0A5G2Q7F8_PIG	Ig-like domain-containing protein	0.00213332	0.01402	-1.24207	15.821	16.3196	15.3208	14.3387	16.1156	16.2387	15.7906	14.117	15.0568	15.3645	14.7298	15.6947	16.3182	14.5396	15.2436	14.8715	16.2413	15.1432	16.8971	15.876	16.7089	15.4567	16.5758	16.6911
A0A5G2QDJ9;F1RPU6	MPZL1	A0A5G2QDJ9_PIG;F1RPU6_PIG	Myelin protein zero like 1	0.00221547	0.01434	0.835249	16.3693	15.889	15.9132	15.7131	15.6029	16.0071	16.1272	16.6736	15.065	16.2453	16.4545	16.2799	15.857	15.4969	15.605	15.0333	15.2933	14.9105	14.9495	15.6466	15.9408	15.1946	15.1953	14.9073
I3LS87	VASN	I3LS87_PIG	Vasorin	0.00240078	0.01541	2.66732	18.7951	19.1093	18.5095	18.6821	18.7681	18.6045	18.7939	18.7753	18.8597	18.7744	18.9271	18.3575	18.359	18.2769	18.497	18.3436	18.2912	18.6338	18.2768	18.3034	13.9159	18.7158	12.7511	14.5209
A0A286ZV56;A0A287AP40;A0A287BIN3;A0A288CG38	CACNA2D1	A0A286ZV56_PIG;A0A287AP40_PIG;A0A287BIN3_PIG;A0A288CG38_PIG	Calcium voltage-gated channel auxiliary subunit alpha2delta 1	0.00271393	0.01727	0.350564	15.5672	15.5919	15.1458	15.5122	15.199	15.4663	15.227	15.2366	15.3263	15.7705	15.3868	15.2849	14.8281	15.0696	14.7583	14.9688	15.0501	14.7959	14.6098	14.7693	15.1216	14.9698	15.3207	15.3375
Q007T2	CDC42	CDC42_PIG	Cell division control protein 42 homolog	0.0027514	0.01735	1.68957	13.0821	13.0814	12.2974	13.471	12.4741	15.204	14.0817	15.431	15.3917	13.2393	14.9329	15.1178	13.7168	13.0184	12.3129	12.846	12.7005	13.0453	12.5067	13.3945	13.5042	15.062	12.0306	11.5591
A0A287BRX8;A0A5G2RBC6;F1SJL4;O19112	CILP	A0A287BRX8_PIG;A0A5G2RBC6_PIG;F1SJL4_PIG;CILP1_PIG	Cartilage intermediate layer protein 1;Cartilage intermediate layer protein 1;Cartilage intermediate layer protein 1;Cartilage intermediate layer protein 1 (Fragment)	0.00277203	0.01735	1.07814	14.9807	15.1718	14.6883	15.2822	14.3737	14.6775	14.2306	15.8779	15.1252	14.0829	15.6964	14.3166	14.3767	14.3506	14.3964	14.4194	13.6268	15.1454	13.3549	13.611	13.2576	14.1435	14.8043	13.6894
F1SJ86	CSPG4	F1SJ86_PIG	Chondroitin sulfate proteoglycan 4	0.00286579	0.0178	1.06854	15.3475	15.5592	15.1492	15.6321	15.19	14.8633	14.9327	15.5348	15.0881	15.1367	15.3209	14.6604	15.725	15.325	14.3926	14.5338	14.8235	14.8169	14.6514	14.4221	14.2004	14.3455	14.3358	12.3072
A0A287AVP6;A0A287B3X4	DLK1	A0A287AVP6_PIG;A0A287B3X4_PIG	Delta like non-canonical Notch ligand 1	0.00290584	0.0179	0.770876	17.8717	16.5576	16.9957	16.9068	16.8186	16.9324	17.1818	18.0577	16.9858	17.4723	17.7207	17.3884	16.4841	16.5454	16.7968	16.2727	16.3356	16.7849	16.4032	17.1221	16.3465	17.3381	16.8876	16.084
A0A287ALJ6	NA	A0A287ALJ6_PIG	Ig-like domain-containing protein	0.00308454	0.0187	0.593031	16.331	17.1708	16.3266	16.654	15.5331	16.8578	16.4163	14.9591	16.208	15.9965	15.2046	16.6363	17.0479	16.3644	15.9777	15.8725	15.7575	14.432	15.1989	15.8381	15.2304	15.4643	14.9353	15.1955
A0A287ADZ3	LY6G6C	A0A287ADZ3_PIG	Lymphocyte antigen 6 complex locus protein G6c	0.00306698	0.0187	-0.986354	15.0327	14.9817	15.6356	15.6664	15.5714	15.2267	14.8445	14.5398	13.7804	14.7427	14.4244	14.2226	15.8242	15.8853	15.7485	15.6985	14.3238	14.7435	16.8097	15.2463	14.6534	15.8435	15.1287	14.791
A0A287AU27	DSPP	A0A287AU27_PIG	Uncharacterized protein	0.00312984	0.01883	1.18788	14.4709	14.3736	15.1565	14.6328	14.9562	15.3671	15.7292	16.8797	15.583	16.066	16.7216	16.8564	15.6457	14.263	14.449	13.1221	14.6779	13.8479	15.3032	15.4152	15.8308	15.2964	13.7973	15.0657
A0A5K1UBC7;I3LD86	PGLYRP2	A0A5K1UBC7_PIG;I3LD86_PIG	N-acetylmuramoyl-L-alanine amidase	0.00327502	0.01953	-0.562381	17.7303	17.657	17.7854	17.7748	17.9394	18.0443	17.531	17.3786	18.1042	17.5228	17.9466	17.1907	18.4195	18.0455	18.4176	18.2655	18.2233	18.1983	17.8087	17.5938	18.566	18.063	18.6008	18.4159
A0A286ZTA8;A0A287BPM1;A0A480VXI4;F1RXW0;Q59IP2	COL5A2	A0A286ZTA8_PIG;A0A287BPM1_PIG;A0A480VXI4_PIG;F1RXW0_PIG;Q59IP2_PIG	Collagen type V alpha 2 chain;Collagen type V alpha 2 chain;Collagen alpha-2(V) chain preproprotein;Collagen alpha-2(V) chain preproprotein;Collagen alpha-2(V) chain	0.00329756	0.01953	1.81436	16.1054	14.653	15.1501	16.6904	15.0475	17.0062	14.6694	17.4218	16.0073	16.0962	17.0877	13.6133	14.9294	14.4323	14.6386	14.289	13.6736	15.0141	11.9413	12.2091	15.2785	13.7056	15.3782	15.4966
A0A287BCT9;A0A287BJ87	EXTL2	A0A287BCT9_PIG;A0A287BJ87_PIG	Exostosin like glycosyltransferase 2	0.00340147	0.01984	-0.40984	18.1519	18.4582	18.137	18.5223	18.2952	18.0866	17.9781	17.5038	17.8086	17.478	17.6115	17.8951	18.0996	17.7954	17.7755	17.7908	18.0361	18.0213	17.9022	17.7851	18.5174	17.8944	18.1691	18.4659
Q9N178	COL10A1	Q9N178_PIG	Type X collagen	0.00339817	0.01984	-1.99557	14.3375	14.9623	14.8645	14.9058	14.8417	14.0571	13.5344	11.9159	12.3257	13.2597	12.7263	9.8176	15.3698	14.4255	14.4623	14.192	14.3947	14.7392	14.5465	13.4773	15.1176	11.8126	16.0939	14.5052
A0A286ZX29	SERPINB12	A0A286ZX29_PIG	Serpin family B member 12	0.00349589	0.02024	-1.88642	12.8121	11.2353	12.3246	12.2187	13.9278	13.7427	13.9163	10.7961	11.0988	10.6196	11.605	13.3614	12.6607	13.7295	13.2105	13.4186	14.1502	13.8213	14.3261	10.8413	14.7717	13.5192	14.9907	14.2668
Q8MI69	WFDC2	WFDC2_PIG	WAP four-disulfide core domain protein 2	0.00354206	0.02035	1.26811	15.0328	14.3159	14.4041	14.36	14.4089	14.1753	15.6145	16.4841	15.0619	14.9663	15.9081	15.3577	12.8283	14.0829	14.8157	13.8808	13.9422	14.2816	13.9542	14.7155	12.9756	15.6404	13.7823	14.716
A0A5G2QIE9;P50390	TTR	A0A5G2QIE9_PIG;TTHY_PIG	Transthyretin	0.00357898	0.02041	-0.591528	23.6361	23.5197	23.661	23.4964	23.8135	23.4093	23.452	23.5316	23.3235	23.4384	23.5045	23.0977	23.0642	23.5899	23.6597	23.5322	23.3634	23.5983	23.2789	23.1457	24.9432	23.7756	24.3286	24.425
A0A287BHL7;I3LC64	ECM1	A0A287BHL7_PIG;I3LC64_PIG	Extracellular matrix protein 1	0.00366642	0.02076	0.675172	19.6798	20.0311	19.7001	19.9535	19.6937	19.4081	19.5617	19.4174	19.5641	19.7613	19.6198	19.6216	19.7025	19.4261	19.6816	19.7612	19.5194	19.7001	19.746	19.2009	18.4955	19.4422	18.4248	18.1853
A0A5G2QNB8;K7GKU8	MASP2	A0A5G2QNB8_PIG;K7GKU8_PIG	Uncharacterized protein	0.00375495	0.0211	-1.39486	15.1683	13.1135	13.7719	15.2021	14.0943	14.7695	14.2459	14.638	14.2241	14.613	15.0914	12.4737	15.6097	14.3034	15.6111	14.8992	15.4455	14.6498	16.0392	15.99	14.8484	15.7555	15.5777	15.4444
A0A287AKU7;A0A287AVF2;A0A287BQB6;F1SMI5;I3LDR6;I3LUI4	TNC	A0A287AKU7_PIG;A0A287AVF2_PIG;A0A287BQB6_PIG;F1SMI5_PIG;I3LDR6_PIG;I3LUI4_PIG	Tenascin	0.00382652	0.0212	1.88663	16.7059	16.3156	15.6309	16.1853	15.9601	16.6735	17.3098	17.8336	17.0686	17.8768	18.7848	17.5347	15.8828	15.5525	15.6986	15.5839	15.6258	15.7881	15.8206	16.9873	16.4875	17.4912	12.1048	16.1972
A0A5G2RB13;F1SPG5;I3LHL6	FBLN2	A0A5G2RB13_PIG;F1SPG5_PIG;I3LHL6_PIG	Fibulin 2	0.00381529	0.0212	0.599458	16.4826	16.8268	16.0974	16.6451	16.4296	15.7388	15.8024	16.7324	16.4029	16.3767	16.5601	15.8958	16.2844	16.387	16.1194	16.1706	16.2594	16.1454	15.9043	15.9062	15.2208	15.9589	15.6655	15.5179
I3LUR7	COL6A3	I3LUR7_PIG	Collagen type VI alpha 3 chain	0.00392162	0.02142	0.523709	19.5723	19.1538	19.1596	19.1305	19.1387	19.3792	19.1454	19.6243	18.746	19.2832	19.4084	18.8771	19.179	18.8748	18.7734	18.5084	19.0321	18.9558	18.3239	18.6798	18.8336	19.0835	18.1179	18.9034
F1RFV5	PSMB6	F1RFV5_PIG	Proteasome subunit beta	0.00391347	0.02142	0.893089	14.9996	14.5845	14.8306	14.8937	14.3417	15.8702	14.2697	15.7774	14.6397	14.3301	14.8432	14.118	15.3766	15.056	14.479	14.1139	14.0928	14.6032	13.6426	13.7894	14.1736	13.6422	14.0552	13.3166
P15468	RNASE4	RNAS4_PIG	Ribonuclease 4	0.00395164	0.02143	-0.454037	17.104	17.512	17.0966	17.113	17.0873	17.088	16.8624	16.6934	17.2127	16.8966	16.6835	17.1848	17.0501	17.1773	17.3872	17.4308	17.3053	17.3057	17.5661	17.1603	17.796	16.6936	17.7043	17.3374
A0A287BEH3;F1SDV5	EMILIN3	A0A287BEH3_PIG;F1SDV5_PIG	Elastin microfibril interfacer 3	0.00409489	0.0219	0.293011	18.0359	17.8777	17.7758	18.0248	17.6127	17.6157	17.5491	17.3541	17.8303	17.8722	17.5176	17.6365	17.7498	17.7575	17.1494	17.4574	17.6515	17.6708	17.3475	17.1388	17.4167	17.5978	17.1717	17.3293
A0A286ZUT9;F1RM86	ADAMDEC1	A0A286ZUT9_PIG;F1RM86_PIG	ADAM like decysin 1	0.00407179	0.0219	1.28589	14.555	14.4172	15.2955	14.6275	15.196	14.9864	15.5722	14.6917	13.5712	15.0909	15.3149	14.9917	14.9857	14.6882	15.2357	14.4492	14.2067	14.5887	14.4827	14.9634	12.7858	13.7238	12.7892	12.7723
A0A287A2R9;A0A5G2QSR7	CRK	A0A287A2R9_PIG;A0A5G2QSR7_PIG	CRK proto-oncogene, adaptor protein;CRK proto-oncogene, adaptor protein	0.00424683	0.02255	1.00373	15.6803	14.9612	15.0678	15.5228	15.1137	17.1529	14.6815	16.9299	15.9546	15.6597	16.2156	15.0618	15.2612	15.0376	15.2862	15.0675	14.8595	15.2619	14.734	14.7175	15.2892	15.0968	13.99	14.6531
A0A286ZKR8;A0A5G2QEX1;F1RFB1	PKD1	A0A286ZKR8_PIG;A0A5G2QEX1_PIG;F1RFB1_PIG	Polycystin 1, transient receptor potential channel interacting;Polycystin 1, transient receptor potential channel interacting;Polycystin 1, transient receptor potential channel interacting	0.00441555	0.02329	0.674213	14.3784	14.0367	13.8413	14.4654	13.8696	14.2782	13.8317	14.2442	14.5055	14.4652	14.4519	13.6897	14.1116	13.3411	12.6047	13.9864	13.6417	13.9087	13.78	13.6403	13.2936	13.7932	13.7317	12.9041
A0A5G2QF97;A0A5G2QVW3;A0A5S6GJ84;O02837	CSF3	A0A5G2QF97_PIG;A0A5G2QVW3_PIG;A0A5S6GJ84_PIG;CSF3_PIG	Granulocyte colony-stimulating factor	0.00456913	0.02373	2.5081	11.2763	12.0991	9.40401	10.5033	0	12.3144	12.6267	14.3345	15.8123	12.4269	14.9443	15.004	13.1948	10.1927	12.3315	11.1338	10.0948	0	12.0932	11.1441	10.6257	13.8279	11.1551	11.2541
A0A287BM29;F1SJT7	APOA4	A0A287BM29_PIG;F1SJT7_PIG	Apolipoprotein A-IV	0.00459135	0.02373	1.14984	19.7691	20.5423	20.0983	19.9945	20.7677	20.4192	20.4598	19.2214	20.7167	21.4609	20.3402	20.1512	20.0262	19.5889	21.0097	19.2983	19.8437	20.3755	19.1921	18.9488	18.1502	19.9134	20.6506	18.596
P79263	ITIH4	ITIH4_PIG	Inter-alpha-trypsin inhibitor heavy chain H4	0.00455199	0.02373	-1.28767	18.4938	19.2891	18.7508	18.2527	18.5381	17.9781	18.841	18.1881	19.7614	19.2225	18.4452	20.6823	18.4058	18.3634	17.9597	19.3984	18.6677	19.5434	19.9182	20.1779	22.0936	19.8473	20.7809	20.0484
A0A5G2Q8S2;F1S9J3;I3LDA4	PXDN	A0A5G2Q8S2_PIG;F1S9J3_PIG;I3LDA4_PIG	Peroxidasin	0.00478615	0.02457	0.904594	18.0627	17.2622	16.9859	17.2927	17.1991	18.1215	17.5795	18.566	17.3662	17.5808	18.3558	18.1664	17.3858	17.1349	17.2224	16.7904	16.7582	16.6585	17.0411	17.8281	16.3478	17.6886	16.3849	16.8967
A0A287AKJ2	NID2	A0A287AKJ2_PIG	Nidogen 2	0.00498062	0.0254	0.788289	15.6923	14.9923	15.0409	15.0157	15.0724	15.5734	15.4865	15.9787	14.7619	14.308	15.802	15.0791	14.7809	14.9922	15.0713	14.3855	14.6237	15.0042	13.7981	14.2979	14.6332	14.6825	14.613	14.6618
A0A480NFS9;A0A5G2QEN6;A0A5G2QUQ9;A0A5G2R215;A0A5G2R8Y6	TGFBR3	A0A480NFS9_PIG;A0A5G2QEN6_PIG;A0A5G2QUQ9_PIG;A0A5G2R215_PIG;A0A5G2R8Y6_PIG	Transforming growth factor beta receptor type 3	0.00513288	0.02584	0.473306	16.9284	16.4625	16.5483	16.8866	16.4076	17.1367	16.2137	16.8539	16.7112	16.5113	16.7471	16.5004	16.7184	16.6815	16.2575	15.9864	16.4091	16.6054	15.665	15.8395	16.8121	16.5737	16.1254	15.682
I3LEE6	PCOLCE	I3LEE6_PIG	Procollagen C-endopeptidase enhancer	0.00513476	0.02584	0.902539	19.8458	18.901	18.9974	19.8656	19.0969	19.5673	19.3217	20.724	20.3216	19.5639	20.9288	19.3723	19.1303	18.9655	18.604	18.6469	18.3994	19.3606	18.5769	18.6198	19.6479	19.9091	19.4252	18.6382
A0A287AL94;A0A287BLR0;A0A5G2QUG6;A0A5G2RC42	PYGL	A0A287AL94_PIG;A0A287BLR0_PIG;A0A5G2QUG6_PIG;A0A5G2RC42_PIG	Alpha-1,4 glucan phosphorylase;Alpha-1,4 glucan phosphorylase;Alpha-1,4 glucan phosphorylase;Alpha-1,4 glucan phosphorylase	0.00521893	0.02609	1.71628	13.4035	12.2732	12.2312	13.805	12.7974	15.3964	13.0348	15.4536	13.8416	12.4491	13.9963	12.8865	12.4397	12.1414	12.3065	11.4481	12.5016	12.8322	12.3961	12.4524	12.087	12.8466	10.4427	11.1393
A0A5G2QCF0	NA	A0A5G2QCF0_PIG	Uncharacterized protein	0.00553044	0.02726	0.493465	15.2378	15.1356	14.751	14.5473	14.7615	14.6235	15.2685	15.243	15.0282	15.1378	15.2769	14.9156	14.3285	14.2943	14.6492	14.1679	14.3098	14.8231	14.4351	14.257	14.6018	15.2179	14.7682	14.6293
F1SS26	THBS1	F1SS26_PIG	Uncharacterized protein	0.00559365	0.02726	1.08519	15.9785	15.7888	15.5747	15.8876	15.6048	16.8948	17.7449	18.4735	18.0466	16.2387	18.7253	17.7477	16.0324	15.6661	16.2473	15.8801	16.1795	15.8103	16.3155	16.9267	16.6686	18.2458	16.2552	16.0539
A0A5G2QE21;A0A5G2QLL3;F1RLZ2	SPINK5	A0A5G2QE21_PIG;A0A5G2QLL3_PIG;F1RLZ2_PIG	Serine peptidase inhibitor, Kazal type 5;Serine peptidase inhibitor, Kazal type 5;Serine peptidase inhibitor, Kazal type 5	0.00556374	0.02726	0.790768	16.5216	15.9635	15.6568	15.8532	15.6503	16.4058	16.1189	17.2028	15.5244	16.1158	16.8443	16.2522	15.3557	15.9828	15.9659	15.3664	15.39	15.3971	15.3647	15.857	15.2341	16.063	15.1835	15.6114
A0A287ANX9	NA	A0A287ANX9_PIG	Uncharacterized protein	0.00557486	0.02726	-1.60604	11.6189	12.4809	12.5383	10.214	12.3823	9.91792	12.1773	12.7011	11.8769	11.0123	10.2671	11.2968	11.323	11.5032	12.0714	9.70404	10.6384	11.3144	11.4351	12.169	14.7759	12.4451	13.4571	14.6856
A0A5K1UCV8;F1RG45	AGT	A0A5K1UCV8_PIG;F1RG45_PIG	Angiotensinogen	0.0056576	0.0274	0.735663	22.6466	21.931	22.6692	22.2729	22.4987	22.7064	22.5407	22.4697	22.5317	23.2334	22.7551	22.6816	22.3896	22.5935	22.9475	22.2542	22.4598	22.4019	22.5808	22.5185	21.4226	22.6541	21.3015	21.3207
Q6QR67	RETN	Q6QR67_PIG	Resistin	0.00581893	0.0279	3.04906	14.1601	12.2087	12.6351	11.9761	12.8259	13.5987	16.8769	18.0129	15.8497	16.2309	18.6232	18.2828	11.4168	14.347	12.0089	11.7818	12.9213	13.6265	15.056	16.3517	12.6535	17.8932	10.8573	12.7704
A0A287AZA7;A0A2C9F3G2;A0A5G2QDJ2;A7U5U2;F1S911;P0CG68;P63053	RPS27A;UBC;UBC;UBB;KXD1;UBC;UBA52	A0A287AZA7_PIG;A0A2C9F3G2_PIG;A0A5G2QDJ2_PIG;A7U5U2_PIG;F1S911_PIG;UBC_PIG;RL40_PIG	Ubiquitin-like domain-containing protein;Polyubiquitin-C;Polyubiquitin-C;Ubiquitin B;Ubiquitin-like domain-containing protein;Polyubiquitin-C;Ubiquitin-60S ribosomal protein L40	0.00583373	0.0279	1.03743	13.723	13.4969	13.7931	14.7142	13.1832	15.4659	14.5791	16.3928	15.0799	14.0166	14.8519	15.0354	15.0263	13.0899	13.9664	13.5414	13.7045	13.5504	13.6086	13.7076	13.9699	14.567	13.9568	13.9213
P51525	NA	PF12_PIG	Prophenin-2	0.00652822	0.03103	2.62825	13.2401	13.3617	12.9181	11.8952	12.4224	12.8542	16.4693	18.6137	15.1817	16.3751	19.9371	17.3049	12.1132	11.6886	13.0291	12.7601	13.7655	12.1935	13.8819	15.1129	12.7528	19.2037	12.8846	14.2763
A0A5G2QP78;K7GMF9	ANPEP	A0A5G2QP78_PIG;K7GMF9_PIG	Aminopeptidase	0.00665819	0.03145	0.483189	16.2566	16.7322	16.5653	16.0395	16.6799	16.1697	16.351	16.5272	16.4411	16.6674	16.3653	16.0382	15.8113	15.5522	16.0461	16.0927	16.0732	16.0783	16.0544	15.7616	16.0849	15.8794	15.901	15.8097
F1SFD1	TIE1	F1SFD1_PIG	Tyrosine kinase with immunoglobulin like and EGF like domains 1	0.00707229	0.03321	0.490206	15.6597	15.7284	15.5592	15.9785	15.6635	16.0677	16.184	16.1108	16.4223	16.084	16.3948	15.7102	15.5102	14.1788	15.6096	15.1066	14.8645	15.5134	15.1024	15.3294	15.7727	16.3988	15.4716	15.8901
F1SAM3	CDH2	F1SAM3_PIG	Cadherin 2	0.0071899	0.03355	0.912502	14.0542	14.0956	13.8388	13.8493	14.4228	14.1934	14.4167	15.0747	14.2461	14.1532	14.9216	13.6041	13.7108	13.4865	13.7812	13.427	13.1951	13.6902	13.5094	13.5861	14.154	14.0981	12.293	13.3007
A0A286ZLG5	NBL1	A0A286ZLG5_PIG	CTCK domain-containing protein	0.00767199	0.03555	0.74702	16.8938	16.1351	16.6164	16.8706	16.5	16.7344	17.0381	17.6248	16.149	16.6467	17.2627	16.5132	16.4037	15.6399	16.4384	16.0052	16.2843	16.3508	16.1728	16.7659	15.6649	16.7295	15.9635	15.4557
A0A287ATV4;A0A287B4G4;A0A5G2QQK3;A0A5G2R1K1;A0A5G2R6S0;I3LKU0	RAC3;RAC1;RAC1;RAC2;RAC2;RAC2	A0A287ATV4_PIG;A0A287B4G4_PIG;A0A5G2QQK3_PIG;A0A5G2R1K1_PIG;A0A5G2R6S0_PIG;I3LKU0_PIG	Rac family small GTPase 3;Rac family small GTPase 1;Rac family small GTPase 1;Rac family small GTPase 2;Rac family small GTPase 2;Rac family small GTPase 2	0.00770943	0.03555	1.48396	13.3479	13.7126	13.9054	13.7354	10.7067	15.8319	15.1487	16.1125	16.1277	14.6664	16.2515	15.5032	14.1961	13.5108	13.3827	13.6764	14.1218	14.0265	13.1593	14.3024	13.1958	16.2814	14.6662	13.3013
F1S1A7	ADAMTS4	F1S1A7_PIG	ADAM metallopeptidase with thrombospondin type 1 motif 4	0.00909403	0.04168	-0.82848	14.1541	14.4195	14.2052	13.3565	13.9735	13.7537	14.3956	15.213	13.9311	14.127	15.2834	13.7446	13.8802	14.0427	14.7427	13.4866	13.7352	14.119	14.5434	14.5549	16.8319	14.5581	14.8391	16.3382
A0A5G2QFH9;A0A5G2QMM3;A0A5G2QPV6;A0A5G2QQ60;A0A5G2QWR7;A0A5G2R8D4;K7GPV0	ADGRG2	A0A5G2QFH9_PIG;A0A5G2QMM3_PIG;A0A5G2QPV6_PIG;A0A5G2QQ60_PIG;A0A5G2QWR7_PIG;A0A5G2R8D4_PIG;K7GPV0_PIG	Adhesion G protein-coupled receptor G2	0.00925504	0.04217	0.244557	16.6199	16.3047	16.1879	16.6074	15.8086	15.9812	15.8252	15.873	16.6004	16.0182	16.2904	16.2044	16.2549	16.3361	15.8835	15.9322	16.2665	15.9983	15.7649	15.8966	15.8221	16.4412	15.7621	15.6573
A0A287AIZ4;A0A287ASA4;A0A287BHZ3	SLC38A10	A0A287AIZ4_PIG;A0A287ASA4_PIG;A0A287BHZ3_PIG	Solute carrier family 38 member 10	0.00937586	0.04247	0.68378	13.8109	12.9033	13.4372	13.5613	12.9142	13.7821	13.9106	13.6876	13.8574	13.7206	12.9468	13.8643	13.5216	13.5485	13.5034	13.2478	13.1687	12.3116	13.0591	12.1838	14.9561	13.0723	11.9156	12.6977
I3LDM1	POSTN	I3LDM1_PIG	Periostin	0.00983128	0.04419	1.2195	17.9947	18.5708	17.7022	17.9882	17.7415	16.7596	16.8387	19.1109	16.2539	17.5979	18.3558	16.5832	17.6202	17.4185	16.7224	17.1481	17.7008	17.4962	16.5203	16.507	15.9463	16.5589	15.7936	16.0972
A0A287A5G2;A0A287AHA1;F1RN59	PAM	A0A287A5G2_PIG;A0A287AHA1_PIG;F1RN59_PIG	Peptidyl-glycine alpha-amidating monooxygenase isoform X1;Peptidyl-glycine alpha-amidating monooxygenase isoform X2;Peptidyl-glycine alpha-amidating monooxygenase isoform X1	0.00987137	0.04419	-1.06021	16.2873	16.2384	15.9055	16.2178	16.2006	16.0385	15.725	16.2507	15.5553	15.6395	16.0647	15.591	16.5458	16.0696	16.0908	16.1907	16.2361	16.7873	15.8594	15.7476	18.2983	16.0326	18.0771	17.1722
A0A287AT36;A0A5G2QNM7;F1S790	C8B	A0A287AT36_PIG;A0A5G2QNM7_PIG;F1S790_PIG	MACPF domain-containing protein	0.0102328	0.04508	-0.312014	16.3966	15.9019	17.0855	15.9803	17.0384	16.2381	16.5975	16.0808	16.2665	16.6022	16.5951	16.1589	16.9334	17.0795	17.6555	17.2066	17.5043	17.1025	17.102	16.805	16.5175	16.5119	16.6638	16.5729
A0A286ZWQ1;F1S405	LTBP1	A0A286ZWQ1_PIG;F1S405_PIG	Latent transforming growth factor beta binding protein 1	0.0102071	0.04508	0.84358	14.3281	14.2078	13.7001	14.4569	14.2988	14.5564	14.1579	15.4823	14.3637	14.5541	15.2842	13.8625	14.3536	14.3118	14.2507	13.1744	13.3018	13.9892	13.9227	13.9931	14.149	13.9239	13.6716	12.983
A0A287A817;F1S887;I3L932	LOC102161654	A0A287A817_PIG;F1S887_PIG;I3L932_PIG	Uncharacterized protein	0.0102464	0.04508	1.65009	13.1572	13.8474	13.2571	14.0134	13.7737	13.6855	13.4888	13.5868	13.3987	13.2007	14.043	13.7046	13.7943	13.3036	12.0675	12.9194	13.7432	12.9519	12.8173	13.4576	7.96177	13.401	11.7881	12.0963
A0A287AD21;A0A5G2QGH3;A0A5G2QJK4;P61958	SUMO3;SUMO2;SUMO2;SUMO2	A0A287AD21_PIG;A0A5G2QGH3_PIG;A0A5G2QJK4_PIG;SUMO2_PIG	Small ubiquitin-related modifier;Small ubiquitin-related modifier 2;Small ubiquitin-related modifier;Small ubiquitin-related modifier 2	0.0106501	0.04659	1.89543	12.0065	7.88599	12.6755	12.4397	11.6911	14.3473	12.7863	16.0302	12.8881	12.4767	15.1205	13.571	12.3704	10.4595	12.1022	11.7285	11.5769	11.5741	10.9387	11.8356	11.4644	13.8317	11.9768	11.4531
A0A286ZKB4;A0A287AIM8	C5	A0A286ZKB4_PIG;A0A287AIM8_PIG	Complement C5a anaphylatoxin	0.0107567	0.04679	-0.410393	19.524	19.6122	19.7827	19.6354	19.9287	19.9879	19.6815	19.0089	19.6951	19.9917	19.7319	19.9787	19.8855	19.8387	19.8199	19.9361	20.0088	19.7705	20.354	20.3716	19.9615	19.981	19.9358	19.9463
A0A286ZVM3;A0A287BJF1	MYL1	A0A286ZVM3_PIG;A0A287BJF1_PIG	Uncharacterized protein	0.0109522	0.04727	2.41213	12.2808	12.7527	13.4797	11.4894	10.5477	11.5995	10.9129	15.77	14.3607	12.5045	14.5062	14.406	11.6467	11.4562	11.9685	10.3487	10.0037	7.34612	10.4556	9.92098	14.6969	12.1286	9.77595	11.0093
A0A5G2Q6W7;F1S3J9	ICAM1	A0A5G2Q6W7_PIG;F1S3J9_PIG	Uncharacterized protein;Intercellular adhesion molecule 1	0.0109891	0.04727	-1.44503	14.2047	14.712	14.5868	14.0701	14.5696	14.1387	15.6145	15.2649	15.1968	15.6387	15.2811	15.2673	13.8733	13.5957	14.2595	14.3406	14.1802	14.3977	15.5842	15.2707	19.3114	15.4796	17.683	17.6046

## Sheet: 22h_LOW_SE - LOW_CON
Accession ID	Gene ID	Protein Name	Protein Description	rawP	adjp	log2FC	HIGH_CON	HIGH_CON	HIGH_CON	HIGH_CON	HIGH_CON	HIGH_CON	HIGH_SE	HIGH_SE	HIGH_SE	HIGH_SE	HIGH_SE	HIGH_SE	LOW_CON	LOW_CON	LOW_CON	LOW_CON	LOW_CON	LOW_CON	LOW_SE	LOW_SE	LOW_SE	LOW_SE	LOW_SE	LOW_SE
F6PSJ3	APOC2	F6PSJ3_PIG	Uncharacterized protein	1.46873e-09	0	-1.23396	18.7806	17.4543	18.7707	18.2571	18.4467	18.8237	17.3202	17.8012	17.9688	17.5238	18.2053	17.159	20.7015	20.4864	20.8164	20.8358	20.6594	20.679	19.8342	19.7736	19.0183	19.963	19.0893	19.0962
K7GPT9	CFB	K7GPT9_PIG	Complement factor B	6.06626e-13	0	1.09889	21.5809	21.8979	21.9187	21.543	21.816	21.5087	22.3065	21.554	22.0498	22.3801	22.0705	21.9784	21.3772	21.4251	21.9541	21.9339	21.8414	21.7785	22.6948	22.4477	23.2131	22.3672	22.9817	23.1989
F1RWV2;P35624	TIMP1	F1RWV2_PIG;TIMP1_PIG	Metalloproteinase inhibitor 1	2.53531e-08	0	1.63823	16.0472	15.9763	16.183	16.2583	16.008	16.658	18.1259	18.6786	18.0149	18.1931	18.6138	18.0054	15.7021	15.3427	15.9278	15.5855	15.365	15.8253	16.6456	17.8497	16.4435	18.8275	17.3889	16.4225
A0A5G2Q6W7;F1S3J9	ICAM1	A0A5G2Q6W7_PIG;F1S3J9_PIG	Uncharacterized protein;Intercellular adhesion molecule 1	3.37252e-09	0	2.7144	14.2047	14.712	14.5868	14.0701	14.5696	14.1387	15.6145	15.2649	15.1968	15.6387	15.2811	15.2673	13.8733	13.5957	14.2595	14.3406	14.1802	14.3977	15.5842	15.2707	19.3114	15.4796	17.683	17.6046
Q6R953	DEFB1	Q6R953_PIG	Beta-defensin 1	9.28778e-09	0	2.59892	13.5807	13.9739	14.4482	13.7328	14.5339	13.8459	15.5826	15.481	14.8095	15.8047	15.5802	15.9144	14.2811	14.0869	14.1642	14.648	14.4474	13.8074	15.4461	15.7641	18.8483	15.3774	17.4221	18.1704
F1S6S9	PRTN3	F1S6S9_PIG	Proteinase 3	0	0	2.93265	12.5962	13.228	13.3775	13.3364	13.3504	12.9501	15.6007	16.3359	16.3542	15.5551	16.3428	16.9884	11.6753	11.8123	12.8105	12.9668	13.9152	11.5924	15.3552	15.8075	15.1951	16.0346	14.231	15.745
A0A287AP71;A0A5G2RAV3;F1SQL2	EFEMP1	A0A287AP71_PIG;A0A5G2RAV3_PIG;F1SQL2_PIG	EGF containing fibulin extracellular matrix protein 1	1.98885e-07	1e-05	-0.72659	18.9847	18.9632	18.7373	18.8056	18.6961	18.9955	18.6662	18.5435	18.4069	18.8355	18.5829	18.6018	18.9336	18.9231	18.6531	18.337	18.6	18.6194	18.3189	18.3041	17.45	18.2672	17.8204	17.5461
F1SRC8	CLEC3B	F1SRC8_PIG	C-type lectin domain family 3 member B	1.93891e-07	1e-05	-0.543612	22.6036	22.6765	22.545	22.5307	22.6114	22.3007	22.0683	21.8763	22.3016	21.8525	21.6899	22.1795	22.9967	22.2901	22.1294	22.4302	22.5509	22.499	22.3984	21.8814	21.5843	22.0026	21.7107	22.0574
A0A286ZTX3;F1RS82	BTD	A0A286ZTX3_PIG;F1RS82_PIG	Biotinidase	1.58447e-07	2e-05	0.882584	16.8332	16.0987	16.9864	16.3449	17.0669	16.5343	17.0631	16.474	16.4759	16.612	16.6078	16.7715	15.2628	15.9278	16.5761	15.528	15.8355	16.6523	16.7574	16.2203	17.1677	17.4162	16.3722	17.1443
F1RM45	APOE	F1RM45_PIG	Apolipoprotein E	3.15133e-07	4e-05	-0.62078	18.2166	17.3399	17.296	17.5079	17.1391	18.2205	17.0986	17.2152	17.3984	17.0501	16.7131	17.0336	18.973	19.3416	18.7699	19.1553	18.898	18.8968	18.4524	17.9778	18.8054	18.4403	18.1869	18.4471
A0A287BEY3	LOC100624077	A0A287BEY3_PIG	Endogenous retrovirus group V member 2 Env polyprotein	5.4124e-07	5e-05	-0.988768	17.569	18.0536	17.5035	17.9948	17.552	18.0896	15.7344	16.4351	15.6913	16.7007	16.1237	15.8384	18.2672	17.5405	18.0826	17.822	17.4232	17.8386	16.9961	16.8391	17.2066	16.0224	16.8577	17.1196
F6Q697;K7GME6	S100A9	F6Q697_PIG;K7GME6_PIG	EF-hand domain-containing protein	8.40787e-07	9e-05	1.74031	13.0406	13.2895	12.7871	11.0098	12.6041	13.3161	14.2299	13.886	14.8008	13.7495	15.0594	14.6571	12.3283	12.4692	13.3195	11.7875	12.2162	11.9951	14.5103	13.4549	13.8055	14.8732	13.8651	14.0486
P20305	GSN	GELS_PIG	Gelsolin (Fragment)	2.15468e-06	0.00015	-0.494167	22.0383	21.9904	22.408	22.014	22.054	22.2954	21.9345	21.7498	21.8432	21.8304	21.959	21.5683	22.694	22.5293	23.3048	23.0342	22.5248	22.8271	22.3632	22.0755	22.4746	22.341	22.4339	22.2611
A0A287AAH4;A0A5G2R543;B8XH67;F6PYE5	SLC9A3R1	A0A287AAH4_PIG;A0A5G2R543_PIG;B8XH67_PIG;F6PYE5_PIG	Na(+)/H(+) exchange regulatory cofactor NHE-RF	3.78365e-06	0.00024	2.9143	14.3667	11.9137	10.1704	11.1511	12.0086	15.1471	15.0242	14.7027	14.3731	15.3299	14.5912	15.5393	10.977	11.0427	11.7443	11.5979	11.3475	11.4814	15.5073	15.0461	12.391	15.2551	13.409	14.068
P18650	APOE	APOE_PIG	Apolipoprotein E	2.87391e-06	0.00032	-1.02183	21.9839	21.4345	21.5425	21.7315	21.3433	22.2882	21.1342	21.2613	21.5624	21.1683	20.9714	20.717	23.2861	23.0918	22.8344	23.2916	22.9522	23.1096	22.7355	22.1857	21.8401	22.6073	21.9816	21.0845
A0A287BPE2	CSF1	A0A287BPE2_PIG	Colony stimulating factor 1	1.94944e-06	0.00037	1.48428	12.6326	13.3523	13.4426	13.5351	13.2885	13.0992	14.7989	14.8007	14.5914	14.5429	15.3871	14.6642	13.4002	12.4596	12.82	12.5651	12.848	12.7576	13.7351	13.6993	16.2094	13.7835	14.3168	14.0121
A0A286ZYP5;A0A287AAB2;A0A287AEH7;A0A287AFM5;A0A287AJS8;A0A287AQG3;A0A287B220;A0A287BBX0;F1S1N1;K7GLN3	SLA-2;SLA-11;SLA-2;SLA-2;SLA-2;SLA-2;SLA-2;SLA-2;SLA-2;	A0A286ZYP5_PIG;A0A287AAB2_PIG;A0A287AEH7_PIG;A0A287AFM5_PIG;A0A287AJS8_PIG;A0A287AQG3_PIG;A0A287B220_PIG;A0A287BBX0_PIG;F1S1N1_PIG;K7GLN3_PIG	Ig-like domain-containing protein;Histocompatibility antigen, class I;Ig-like domain-containing protein;Ig-like domain-containing protein;Ig-like domain-containing protein;Ig-like domain-containing protein;Ig-like domain-containing protein;Ig-like domain-containing protein;Ig-like domain-containing protein;Ig-like domain-containing protein	1.29623e-05	0.00051	2.0285	12.6126	12.5621	12.5405	12.65	12.7752	13.9575	14.4565	15.5207	14.8275	13.9632	15.551	14.3675	12.8702	12.5255	12.3569	12.0981	11.5316	11.4407	14.3045	15.0393	13.1136	15.8693	14.219	12.4482
A0A5K1TWC1;F1SQX9	APOD	A0A5K1TWC1_PIG;F1SQX9_PIG	Apolipoprotein D	1.25275e-05	0.00051	-0.776416	19.3693	19.9435	18.8827	19.4591	18.6648	19.643	18.8223	18.2014	19.555	18.8156	18.1167	19.8177	20.0374	20.2291	19.2515	19.8683	20.1934	19.3123	19.9178	19.3861	18.5653	19.4174	19.0617	17.8852
A0A287AKL0;F1S9C0;F6Q5X1;P0DSO0	;SAA3;;SAA2	A0A287AKL0_PIG;F1S9C0_PIG;F6Q5X1_PIG;SAA2_PIG	Serum amyloid A protein;Serum amyloid A protein;Serum amyloid A protein;Serum amyloid A-2 protein	1.1849e-05	0.00051	4.40567	16.8445	12.8521	12.3944	15.1707	13.4153	14.1168	19.3011	18.1913	19.0444	21.2225	17.5244	19.8202	14.6466	13.4669	12.7015	15.0277	14.6523	14.5131	21.7158	21.5631	16.2545	19.7773	14.8233	17.3081
P50828	HPX	HEMO_PIG	Hemopexin	2.50238e-05	0.00067	2.57087	17.7606	17.0168	17.5808	17.7866	18.217	18.0072	17.5894	17.1097	17.3296	17.8398	17.4032	18.2552	17.9303	18.7967	17.8214	18.1356	18.5253	17.7997	20.0959	18.9919	23.2439	18.2068	22.0304	21.8653
P04366	AMBP	AMBP_PIG	Protein AMBP (Fragment)	1.50947e-05	0.00067	-0.518724	22.8883	22.3244	22.9473	22.7041	22.8905	22.4782	22.1205	22.3235	21.8885	22.4719	22.1518	21.7958	22.9862	22.899	23.084	22.6217	22.9076	22.9285	22.5854	22.4262	22.2289	22.3282	22.2096	22.5362
F1S1A7	ADAMTS4	F1S1A7_PIG	ADAM metallopeptidase with thrombospondin type 1 motif 4	9.78139e-06	0.00067	1.2765	14.1541	14.4195	14.2052	13.3565	13.9735	13.7537	14.3956	15.213	13.9311	14.127	15.2834	13.7446	13.8802	14.0427	14.7427	13.4866	13.7352	14.119	14.5434	14.5549	16.8319	14.5581	14.8391	16.3382
A0A287A0M2	ARSG	A0A287A0M2_PIG	Arylsulfatase G	5.91735e-05	0.00109	-1.03006	14.396	15.2913	15.1906	14.8828	14.9899	14.6163	14.6117	14.2185	14.7836	14.8717	14.8158	13.4539	14.79	14.9478	15.095	15.1107	14.276	15.3301	14.2812	13.3496	14.4009	13.6246	13.8531	13.8598
F1RQ17	ADGRF5	F1RQ17_PIG	Adhesion G protein-coupled receptor F5	1.38425e-05	0.00118	1.36203	15.5481	15.6145	15.4111	15.5963	15.6743	15.4117	16.1881	16.0758	16.1111	16.2554	16.1005	15.9407	14.9844	15.3608	15.4149	15.0597	14.3312	14.9124	15.0375	15.5254	17.3689	15.7325	17.2016	17.3696
A0A5G2QF21;F1RUQ1;O97939	ENAM	A0A5G2QF21_PIG;F1RUQ1_PIG;ENAM_PIG	Enamelin	3.90401e-05	0.00161	1.21476	12.1977	12.0165	12.2025	12.4168	11.5168	12.2939	12.4374	13.4437	12.0005	11.6758	12.8618	13.0027	10.6678	11.7906	11.6667	11.413	11.7781	11.355	11.8639	12.343	13.5358	13.0594	12.6263	12.5314
P79263	ITIH4	ITIH4_PIG	Inter-alpha-trypsin inhibitor heavy chain H4	2.56171e-05	0.00175	1.75469	18.4938	19.2891	18.7508	18.2527	18.5381	17.9781	18.841	18.1881	19.7614	19.2225	18.4452	20.6823	18.4058	18.3634	17.9597	19.3984	18.6677	19.5434	19.9182	20.1779	22.0936	19.8473	20.7809	20.0484
A0A287BEU8;A0A5K1UL09;K7GPV8;Q9GKE2	CXCL16	A0A287BEU8_PIG;A0A5K1UL09_PIG;K7GPV8_PIG;CXL16_PIG	C-X-C motif chemokine 16	0.000117135	0.0019	1.40826	12.4707	10.6043	13.3759	12.3331	11.7536	11.9317	12.647	13.8199	12.5819	13.6356	13.7585	13.293	10.8086	11.5589	11.2406	12.234	11.6674	11.7007	12.2241	13.4303	13.1785	13.6839	12.7375	12.4054
I3LVL5	CRISP3	I3LVL5_PIG	Cysteine rich secretory protein 3	6.05529e-05	0.0019	0.873155	16.7433	17.6442	17.2137	17.4554	17.3238	16.7789	18.213	17.7356	17.8949	17.6776	18.0412	18.3435	16.9992	16.7641	17.0652	16.5758	16.8521	17.1266	17.3567	17.4265	18.7739	18.0477	17.2873	17.7297
A0A286ZI97	PGLYRP1	A0A286ZI97_PIG	Peptidoglycan-recognition protein	6.55137e-05	0.00211	2.09635	13.8988	12.5857	11.8423	12.5681	11.5913	11.9945	14.6481	15.7706	14.0168	14.0015	16.5907	15.7196	11.6798	11.7773	12.5832	11.1807	11.9585	11.2686	13.3421	14.0607	13.6798	15.9352	13.5035	12.5049
F1RN76	CD5L	F1RN76_PIG	Uncharacterized protein	6.70884e-05	0.00212	-1.08474	18.5287	18.5922	18.5692	18.4862	18.57	18.5277	18.8621	18.0566	19.0903	19.0938	17.4703	18.8482	19.0795	19.5571	19.3658	19.6109	19.258	19.5171	18.7874	18.5132	17.9915	19.1874	17.5644	17.8361
A0A5G2Q7R0;A0A5G2QW87	COL6A1	A0A5G2Q7R0_PIG;A0A5G2QW87_PIG	Collagen type VI alpha 1 chain	8.25199e-05	0.00233	-0.747525	20.2333	20.1151	19.8253	20.2688	19.8112	19.7605	19.655	20.5118	19.8641	19.5078	19.7751	19.6458	19.6249	19.6428	19.6416	18.9775	19.1055	19.6883	18.5133	18.5247	18.1649	18.9616	19.1886	18.8424
A0A287B7B9;A0A287BEM9;A0A5G2QVI0;A0A5S6FYV9;A0A5S6I1G3;Q07717	B2M	A0A287B7B9_PIG;A0A287BEM9_PIG;A0A5G2QVI0_PIG;A0A5S6FYV9_PIG;A0A5S6I1G3_PIG;B2MG_PIG	Beta-2-microglobulin	8.19675e-05	0.00244	1.68642	15.6547	15.233	14.8181	15.7823	14.9813	16.5687	18.0024	17.5359	16.4096	17.3847	18.028	17.8136	15.302	15.0145	15.4581	14.5036	14.9381	14.8242	17.219	18.0302	16.1897	17.6565	15.0478	16.0159
A0A5G2QKI1;Q8MJ39	MGP	A0A5G2QKI1_PIG;MGP_PIG	Matrix Gla protein	9.55326e-05	0.00261	1.47354	18.0879	18.2191	18.1102	18.0763	18.3383	18.8544	20.5477	20.2719	20.382	20.3879	20.6279	21.1689	17.6393	17.7497	17.6259	17.2914	17.2444	16.9487	18.8893	20.3247	17.422	20.2412	18.2399	18.2235
A0A5G2QJT3;F1RHA9	LECT2	A0A5G2QJT3_PIG;F1RHA9_PIG	Leukocyte cell-derived chemotaxin-2;Leukocyte cell derived chemotaxin 2	0.000295517	0.00381	-0.955383	12.1896	11.205	11.9105	12.0891	12.0961	12.1443	9.8826	10.3055	10.2416	9.42327	10.1595	10.3463	12.6388	12.3843	12.5255	12.1568	11.8757	11.8838	11.4244	11.4916	11.4555	11.1807	10.1742	12.0062
I3LMU6	RCN3	I3LMU6_PIG	Reticulocalbin 3	5.50408e-05	0.00412	-0.31661	17.8572	17.7495	17.871	17.6188	17.5921	17.8472	17.3971	17.8045	17.6404	17.7612	17.6721	17.5009	17.4722	17.7342	17.7761	17.4928	17.5356	17.6514	17.2779	17.2019	17.0787	17.4286	17.3263	17.4492
F1SL22	VWF	F1SL22_PIG	von Willebrand factor	0.000160643	0.00413	1.25899	19.797	19.1447	18.2221	18.9416	18.6047	19.2555	19.7504	20.3199	20.7325	19.571	20.2296	21.4339	18.7035	19.2223	18.7783	18.8361	18.8272	18.5596	18.9033	20.0655	19.9372	20.4723	20.2729	20.8297
A0A287BPW3;P32196	LOC102159373;NPG3	A0A287BPW3_PIG;PG3_PIG	Uncharacterized protein;Protegrin-3	0.000230403	0.00588	3.10165	13.8009	15.1419	14.6358	14.7634	14.416	15.7438	18.7828	20.6501	18.3202	18.6587	21.2124	20.2473	14.0707	13.3476	15.1753	14.2816	16.4694	13.7225	18.1171	19.0453	16.0666	20.8609	15.007	16.5803
A0A287AEY7;A0A287BHG5;A0A5G2QIS5;A0A5G2QTD7;A0A5G2QV88	VSIG4	A0A287AEY7_PIG;A0A287BHG5_PIG;A0A5G2QIS5_PIG;A0A5G2QTD7_PIG;A0A5G2QV88_PIG	V-set and immunoglobulin domain containing 4	0.000294249	0.00588	3.34424	11.6289	12.2966	12.1942	12.0869	10.6692	12.4345	12.9451	14.1389	11.9205	13.2076	13.6418	12.2006	11.8571	10.3562	12.4031	11.2782	11.5952	11.9469	12.0063	12.4929	17.422	12.6533	17.8793	17.0485
A0A5G2QSL2;I3LJ52	CTRB2	A0A5G2QSL2_PIG;I3LJ52_PIG	Peptidase S1 domain-containing protein	0.00022334	0.00601	1.42434	12.1604	12.3666	13.9388	12.4526	13.9071	12.0895	14.2175	16.5456	12.5271	13.8813	14.8046	12.9025	11.0212	10.4897	12.3391	10.3933	11.4566	11.1397	12.6172	13.2933	9.87177	13.3218	13.4369	12.8448
F1SCC7	LOC396684	F1SCC7_PIG	SERPIN domain-containing protein	0.000365039	0.00601	1.59824	20.5815	20.2234	20.6266	20.0563	20.6064	21.0539	22.4835	21.6255	21.7882	23.1291	22.0274	23.1271	20.7358	20.8473	20.1011	20.8716	21.4744	20.4282	23.9196	23.5622	21.2025	22.9371	21.187	21.2395
A0A5S6HJF8;P79281	PTN	A0A5S6HJF8_PIG;PTN_PIG	Pleiotrophin	0.00039077	0.00601	-2.14651	15.5979	14.8292	13.5314	17.0622	11.4743	15.4847	10.517	12.6158	12.3712	13.3057	12.5465	12.7538	15.0563	15.6212	14.2743	15.4303	14.8215	13.6282	14.6914	11.4416	12.7792	11.8959	13.4296	11.7152
A0A287AUK6;F1RGR4	EFNA1	A0A287AUK6_PIG;F1RGR4_PIG	Ephrin-A1	0.000369265	0.00644	1.93834	14.7905	14.0538	13.9788	14.1378	13.9293	15.3978	14.6402	16.1778	14.2444	14.1614	15.7947	15.0035	13.7461	13.7668	13.8099	13.012	12.833	13.618	13.154	14.7187	16.8466	14.8211	16.3155	16.5598
A0A287ANX9	NA	A0A287ANX9_PIG	Uncharacterized protein	0.000248227	0.00681	2.06887	11.6189	12.4809	12.5383	10.214	12.3823	9.91792	12.1773	12.7011	11.8769	11.0123	10.2671	11.2968	11.323	11.5032	12.0714	9.70404	10.6384	11.3144	11.4351	12.169	14.7759	12.4451	13.4571	14.6856
A0A287A371;A0A287BJE4;A0A288CFZ8;Q4Z8N7	PLA2G7	A0A287A371_PIG;A0A287BJE4_PIG;A0A288CFZ8_PIG;Q4Z8N7_PIG	Platelet-activating factor acetylhydrolase	0.000348356	0.00792	-0.57037	15.1446	15.3292	15.8357	15.892	15.5342	15.4784	15.6892	14.9568	15.4747	15.7431	15.2982	15.0653	16.0697	15.9705	15.7741	15.5613	15.8274	15.2313	15.1824	14.9955	15.6491	14.6221	15.3472	15.2157
A0A480P2B4	SERPINA5	A0A480P2B4_PIG	Plasma serine protease inhibitor preproprotein	0.0004101	0.00855	-0.481321	19.3658	18.7912	19.4915	19.1401	19.3926	19.111	18.7987	18.2103	18.509	18.5516	18.6563	18.3418	19.6354	19.7371	20.1038	20.0249	20.0325	19.9406	19.6553	19.0562	19.3293	19.3143	19.6687	19.5626
A0A287AR98;A0A5G2QV81	SBSN	A0A287AR98_PIG;A0A5G2QV81_PIG	Suprabasin	0.000321195	0.00868	-0.650739	15.9211	15.8997	15.5696	16.0288	15.733	16.0773	15.4995	16.0763	15.4187	15.9613	15.5642	15.7559	16.0751	16.1837	15.5836	15.4072	15.4544	15.4791	15.4889	15.2317	14.93	15.3453	14.8688	14.4139
E9KYT3;P24854	IGFBP4	E9KYT3_PIG;IBP4_PIG	Insulin-like growth factor-binding protein 4	0.000415051	0.00899	1.03391	15.088	14.6734	14.8196	14.9943	14.8677	15.6149	15.6252	16.5331	15.4177	15.9401	16.2888	15.9896	15.0081	14.8723	15.2026	14.7559	14.9966	14.6111	15.8612	16.5172	15.1252	16.3196	14.9282	16.8985
A0A5G2QC50;A0A5G2QTA4;A0A5G2R175;C0JPM4	TIMP2	A0A5G2QC50_PIG;A0A5G2QTA4_PIG;A0A5G2R175_PIG;C0JPM4_PIG	NTR domain-containing protein;NTR domain-containing protein;NTR domain-containing protein;Tissue inhibitor of metalloproteases-2	0.000544407	0.0095	-0.636954	15.515	15.2197	14.954	15.4633	15.0665	15.356	14.6179	14.6479	15.1313	15.6358	14.8054	14.6196	15.9865	15.713	15.1085	15.3824	15.1958	15.6873	14.9867	14.9935	14.6702	14.6831	14.6632	15.2551
A0A480TAV6;F1SJF9	FAM3C	A0A480TAV6_PIG;F1SJF9_PIG	Family with sequence similarity 3 member C	0.000568772	0.00974	3.67702	16.7774	15.905	15.7939	16.0253	16.061	17.1769	16.6734	17.6903	16.1845	16.5286	17.4769	16.287	15.7886	15.6213	16.2699	15.2902	15.113	15.7201	15.3343	16.3495	23.4148	16.6162	22.3543	21.7964
A0A287BHL7;I3LC64	ECM1	A0A287BHL7_PIG;I3LC64_PIG	Extracellular matrix protein 1	0.000652192	0.01207	-0.716024	19.6798	20.0311	19.7001	19.9535	19.6937	19.4081	19.5617	19.4174	19.5641	19.7613	19.6198	19.6216	19.7025	19.4261	19.6816	19.7612	19.5194	19.7001	19.746	19.2009	18.4955	19.4422	18.4248	18.1853
A0A287AG48;A0A287ASI0	KRT7	A0A287AG48_PIG;A0A287ASI0_PIG	Keratin 7	0.000770708	0.01226	2.6172	10.478	8.98967	12.6061	11.881	9.664	9.27416	11.5668	11.4839	11.9333	11.1057	11.515	14.6579	9.72801	10.236	8.45729	9.11605	8.20933	10.3639	13.9795	10.4592	14.1054	11.9249	10.4219	10.923
A0A287BBJ9	PCSK9	A0A287BBJ9_PIG	Proprotein convertase subtilisin/kexin type 9	0.00133595	0.02112	-1.08915	16.617	14.7387	16.3606	15.9553	15.6744	16.3012	14.6737	13.8418	14.3331	14.7374	14.602	14.7766	16.2905	16.1426	16.7979	17.1276	16.9632	16.0629	15.6066	15.2633	16.0587	13.9852	15.4787	16.4573
A0A5G2R7M3	ITIH4	A0A5G2R7M3_PIG	Inter-alpha-trypsin inhibitor heavy chain H4	0.00122877	0.02112	0.622442	23.3237	23.4645	23.638	23.529	23.5133	23.4476	23.9667	23.1516	23.7907	24.4135	23.4437	24.0776	23.4357	23.385	23.6088	23.5731	23.5421	23.416	24.6751	24.4931	24.1533	24.0913	23.6224	23.6601
A0A5G2RH47;A0A5G2RLJ6;F1RU52;I3LGH6	DPP3	A0A5G2RH47_PIG;A0A5G2RLJ6_PIG;F1RU52_PIG;I3LGH6_PIG	Dipeptidyl peptidase 3	0.00128223	0.02127	-1.40807	14.5678	14.8309	13.5889	12.3139	13.6231	14.5308	13.7164	14.7615	14.5465	14.3242	13.6447	14.2991	14.2316	14.6229	15.7303	13.8539	15.1513	14.7494	14.314	13.2652	13.0076	12.1416	13.8705	13.292
A0A287AG13	APOB	A0A287AG13_PIG	Apolipoprotein B	0.00120106	0.02248	-0.645083	20.8479	20.2771	20.3635	20.5486	20.6244	20.6701	20.55	19.8971	20.2299	20.6926	20.0517	20.9529	21.3757	21.3022	21.1763	21.7199	21.7948	21.3717	21.2246	21.074	20.0328	21.2717	20.9302	20.3368
F1RUM1	AFM	F1RUM1_PIG	Afamin	0.00160535	0.0239	0.811352	22.5178	23.3383	23.4432	22.3141	23.0408	22.0925	23.1077	22.8084	22.4964	22.9863	22.1758	22.6089	21.9766	22.4883	23.4475	23.2556	22.807	23.2417	23.3671	23.2127	24.3971	23.1263	24.1212	23.8605
A0A286ZRX6;F1RHK7	PEAR1	A0A286ZRX6_PIG;F1RHK7_PIG	Platelet endothelial aggregation receptor 1	0.00141745	0.02521	-0.541953	16.3312	16.37	16.0109	16.201	15.9676	15.9681	16.0485	15.5486	16.3934	16.3072	15.8795	16.0033	16.101	16.1936	15.8741	15.478	16.1575	15.8033	15.454	15.4266	14.8837	15.9268	15.3898	15.2749
A0A286ZJL9;A0A287A2V7;A0A287ATT2;A0A287B9G9	NA	A0A286ZJL9_PIG;A0A287A2V7_PIG;A0A287ATT2_PIG;A0A287B9G9_PIG	Uncharacterized protein	0.00165424	0.02531	-0.820754	18.8416	20.1876	18.6407	19.3731	18.8365	19.1689	19.3516	17.4355	18.9768	18.6208	17.7886	19.0282	20.2602	18.6752	18.7984	19.3771	19.5205	18.031	18.8791	19.2366	17.504	18.3512	18.0367	17.7302
A0A5G2QUE0	SERPINC1	A0A5G2QUE0_PIG	SERPIN domain-containing protein	0.0017963	0.02732	0.328776	22.8146	22.6424	22.9389	22.6828	22.7556	22.7169	22.6989	22.2011	22.5166	22.6399	22.521	22.273	22.4548	22.4817	22.9247	22.7893	22.4806	22.5792	22.7777	22.5186	23.3564	22.795	23.0669	23.1684
A0A286ZUW5;A0A5G2QBH8;A0A5G2R790;A1X898;F6QB76	P4HA1	A0A286ZUW5_PIG;A0A5G2QBH8_PIG;A0A5G2R790_PIG;A1X898_PIG;F6QB76_PIG	Prolyl 4-hydroxylase subunit alpha 1;Prolyl 4-hydroxylase subunit alpha 1;Prolyl 4-hydroxylase subunit alpha 1;Procollagen-proline 2-oxoglutarate-4-dioxygenase;Prolyl 4-hydroxylase subunit alpha 1	0.00236719	0.03336	4.48109	6.68066	11.645	11.7374	6.33603	12.0977	10.0612	10.7601	12.899	8.31485	10.1078	12.2866	11.2426	9.54734	0	11.8087	9.94631	0	11.4944	10.3534	10.7419	13.1856	11.3863	12.6116	11.4046
A0A5G2QEW1	ITIH4	A0A5G2QEW1_PIG	Inter-alpha-trypsin inhibitor heavy chain H4	0.00201339	0.03336	0.87527	21.6028	21.9549	21.9032	22.0436	21.6303	21.5725	22.5251	21.2302	22.1474	22.6106	21.9624	22.6422	21.6412	21.7592	21.2269	22.2065	21.9732	21.4397	23.0658	23.4818	22.0257	22.3201	22.572	22.0328
F1STG6;I3LE48	IL1R2	F1STG6_PIG;I3LE48_PIG	Interleukin 1 receptor type 2	0.0021226	0.03378	0.682745	14.0644	14.4169	14.539	14.6153	14.57	13.9921	14.7587	15.3197	15.1156	15.6702	15.2898	14.9098	13.2448	14.8207	14.0616	14.3662	13.5959	14.3551	14.3668	14.1799	15.3713	14.7997	15.1284	14.6947
F1RQW7	C2	F1RQW7_PIG	Uncharacterized protein	0.00231504	0.03428	1.26258	14.4905	14.3555	13.8171	14.309	13.9864	15.3294	15.5101	15.2686	15.1314	16.0453	15.7564	15.9512	14.254	13.8307	13.3832	13.8455	14.0281	14.0642	16.1671	16.5854	14.7498	15.517	13.3139	14.648
A0A5G2RCQ0;I3LB80	SLC3A2	A0A5G2RCQ0_PIG;I3LB80_PIG	Solute carrier family 3 member 2	0.00239534	0.03478	-0.85928	14.9442	15.5955	14.9726	15.3663	15.223	15.2886	15.2504	15.3808	15.5139	15.8616	15.2393	15.1396	14.9229	14.5229	14.9477	14.5224	14.7464	14.5178	14.4929	14.3092	12.5495	14.7107	14.1369	12.8253
A0A286ZJ21;A0A287ADL0;I3LEW0	COLEC11	A0A286ZJ21_PIG;A0A287ADL0_PIG;I3LEW0_PIG	Collectin subfamily member 11	0.00261067	0.03739	-0.402055	17.1541	16.9293	16.7553	16.7694	17.0123	17.0413	16.4735	15.9333	16.6016	16.4862	16.2398	16.119	16.748	16.7502	16.3517	16.3469	16.516	16.3229	15.7745	16.0177	16.122	16.1454	16.584	15.9797
A0A287AT18	PSMA7	A0A287AT18_PIG	Proteasome subunit alpha type	0.00322474	0.03906	-1.40386	14.9635	14.4751	13.7252	14.4281	13.8977	15.6982	13.7634	15.6969	14.6733	14.5622	15.0159	14.3149	15.0605	14.1501	14.0949	13.9293	14.2652	14.1888	13.6181	13.9537	11.7137	14.0306	12.1867	11.7631
F1S567	VCAM1	F1S567_PIG	Uncharacterized protein	0.00281473	0.0395	0.620573	16.936	16.8431	16.6842	15.9185	16.6564	16.7624	17.9436	17.3397	17.3901	17.818	17.9125	17.8678	16.6736	15.8429	16.6635	16.426	16.6492	16.3722	17.185	17.14	16.8837	17.694	16.563	16.8851
F1SFI5	HRG	F1SFI5_PIG	Uncharacterized protein	0.00318106	0.03963	-0.781991	24.9513	24.9508	25.177	24.7297	25.1474	24.9762	24.0223	23.1208	24.2266	24.4671	23.3145	24.1509	24.5643	24.6414	24.9428	24.0696	24.7101	24.7432	24.4973	24.3712	23.8845	23.1563	23.2737	23.7965
A0A287B237;A0A287BGA9;A0A5G2QLV7;A0A5G2QQ52;F1RGQ1;I3LIM6;I3LQN5	ADAM15	A0A287B237_PIG;A0A287BGA9_PIG;A0A5G2QLV7_PIG;A0A5G2QQ52_PIG;F1RGQ1_PIG;I3LIM6_PIG;I3LQN5_PIG	ADAM metallopeptidase domain 15	0.00347984	0.04359	1.39748	12.565	11.6454	11.7477	12.5121	11.9256	13.3105	12.0512	13.2161	12.2536	11.9986	12.431	12.1774	12.1965	12.5364	11.9305	11.6477	10.6335	11.9891	11.9374	12.4641	14.3375	12.2492	13.8225	14.5079
A0A287AK21;A0A287BK36;F1RJ93	TAGLN2	A0A287AK21_PIG;A0A287BK36_PIG;F1RJ93_PIG	Transgelin	0.00342859	0.04359	2.71373	13.593	12.3863	13.4752	11.8885	12.7804	15.7528	14.4228	16.2491	14.4883	13.5869	15.5643	13.9981	12.9502	13.1227	13.7836	13.1213	12.6554	12.9373	12.712	13.588	17.6626	14.8892	18.0187	17.9825
A0A287BPL8;I3L5Z1	CDH1	A0A287BPL8_PIG;I3L5Z1_PIG	Uncharacterized protein	0.00365685	0.04747	-0.404089	17.4341	17.9792	17.8285	17.9432	17.7215	17.8402	17.4577	17.6674	17.4309	18.0482	17.5475	17.2553	17.62	17.5749	17.8537	17.5467	17.4975	17.6237	17.4844	17.2871	16.7946	17.4665	16.93	17.3295
