# Supplementary material for: Altered hepatic metabolism mediates sepsis preventive effects of reduced glucose supply in infected preterm newborns
Source: eLife. 2025 Feb 24;13:RP97830. doi: 10.7554/eLife.97830 (PMC11850001; doi:10.7554/eLife.97830)
Supplement: Figure 6—source data 1. [file elife-97830-fig6-data1.xls]

## Sheet: Sheet1
Litter	Letter	Group	Female	BW	Lifespan	Sepsis	ID	Birthweight	Time	Leu	RBC	Hemoglobin	Hematocrit	MCH	MCHC	Platelets	MPV	MCV	MPC	pNeu	pLymph	pMono	pEOS	pBaso	pLUC	Neu	Lymph	Mono	EOS	Bas	LUC	pReticulocyte	Reticulocytes	AG	group	id	Glucose	CFU	B	IL6	IL10	TNFA
1	A	3H	0	944	12	0	505	944	3	1.31	4.39	6.6	0.374	1.51	17.74	396	10.7	85.2	214	25.4	73.6	0.5	0.2	0.1	0.1	0.33	0.96	0.01	0	0	0	7	308.2		3H	A1	15.4	4.92082	A	144.373	273.259	275.039
1	A	3H	0	944	12	0	505	944	6	0.52	3.82	5.8	0.311	1.52	18.71	311	10.9	81.4	219	16.4	82.2	0.5	0.7	0.2	0	0.09	0.43	0	0	0	0	7.2	276.8		3H	A1	1.8	4.68425		277.852	501.348	132.459
1	A	3H	0	944	12	0	505	944	12	1.68	3.69	5.5	0.293	1.49	18.74	235	12.2	79.6	199	42.2	57	0.1	0.4	0.1	0.1	0.71	0.96	0	0.01	0	0	5.8	215.4		3H	A1	1.8	4.22185
2	A	3H	1	610	12	0	536	610	3	1.6	4.06	6.6	0.327	1.62	20.05	224	12.1	80.6	225	28.9	70.3	0.4	0.3	0.2	0	0.46	1.12	0.01	0	0	0	8	323.4		3H	A2	13	4.94612		32.33	191.296	138.684
2	A	3H	1	610	12	0	536	610	6	1.08	4.24	6.5	0.325	1.53	19.99	239	12.2	76.8	225	54.5	43.8	0.4	1	0.4	0	0.59	0.47	0	0.01	0	0	7.9	334.3		3H	A2	1.1	5.33579		179.429	406.335	329.392
2	A	3H	1	610	12	0	536	610	12	0.57	3.12	4.8	0.236	1.55	20.52	159	13.1	75.6	205	39.2	59.5	0.3	0.8	0.2	0	0.22	0.34	0	0	0	0	6.6	206.5		3H	A2	1.4	5.58358
1	B	HIGH	0	881	3.25	1	500	881	3	4.58	4.46	7	0.38	1.57	18.38	417	12.8	85.2	206	16.3	81.3	0.9	0.2	1.3	0	0.75	3.73	0.04	0.01	0.06	0	5.8	259.3		HIGH	B1	23.9	5.8653		44.572	99.264	68.407
1	B	HIGH	0	881	3.25	1	500	881	6	1.74	3.77	5.4	0.307	1.44	17.66	323	14	81.5	204	16.7	81.1	1	0.3	0.8	0.1	0.29	1.14	0.02	0.01	0.01	0	6.8	255.2	Killsample	HIGH	B1				61	17.068	6.237
1	B	HIGH	0	881	3.25	1	500	881	12																										HIGH	B1
2	B	3H	0	749	12	0	534	749	3	1.59	2.81	4.3	0.231	1.54	18.75	300	10.5	82.2	218	27.3	71.1	0.8	0.7	0.1	0	0.43	1.13	0.01	0.01	0	0	6.6	184.8		3H	B2	18.4	5.69897		93.942	165.537	243.411
2	B	3H	0	749	12	0	534	749	6	0.66	3.01	4.8	0.238	1.59	20.08	264	10.6	79.3	219	25.4	72.6	0.4	0.9	0.8	0	0.17	0.48	0	0.01	0.01	0	6.1	182.3		3H	B2	2.4	5.42597		117.776	193.638	14.343
2	B	3H	0	749	12	0	534	749	12	1.18	1.63	2.5	0.132	1.52	18.83	104	13.8	80.7	202	10.3	75.8	4.1	0.9	1	7.9	0.12	0.89	0.05	0.01	0.01	0.09	4.8	79.1		3H	B2	1.2	5.30103
1	C	HIGH	0	769	12	0	510	769	3	1.52	4.4	6.4	0.353	1.46	18.23	371	12.3	80.2	222	29.6	69.1	0.5	0.4	0.4	0	0.45	1.05	0.01	0.1	0.1	0	6.8	298.7		HIGH	C1	16.6	4.88461		54.695	197.385	142.447
1	C	HIGH	0	769	12	0	510	769	6	0.56	3.89	5.8	0.321	1.48	17.96	288	14.2	82.4	225	26.2	67.6	3.8	1.7	0.5	0.2	0.15	0.38	0.02	0.01	0	0	5.6	218.1		HIGH	C1	20.2	4.94612		286.055	542.797	45.971
1	C	HIGH	0	769	12	0	510	769	12	0.96	3.42	4.8	0.284	1.41	17.03	214	15.7	83.1	210	36	61.6	1.4	0.4	0.3	0.4	0.34	0.59	0.01	0	0	0	4.1	140.2		HIGH	C1	32.1	4.8653
2	C	6H	0	541	12	0	539	541	3	1.29	3.56	5.8	0.293	1.62	19.61	323	10.3	82.5	224	23.2	75.1	1	0.3	0.4	0.1	0.3	0.97	0.01	0	0.01	0	9.5	338.1		6H	C2	19.6	5.42597		48.388	185.676	148.961
2	C	6H	0	541	12	0	539	541	6	0.78	3.38	5.3	0.272	1.58	19.6	274	10.3	80.4	224	34	62.7	0.7	1.4	1.2	0	0.26	0.49	0.01	0.01	0.01	0	9.8	332.8		6H	C2	19.6	5.56427		98.299	466.565	170.746
2	C	6H	0	541	12	0	539	541	12	1	3.54	5.5	0.274	1.57	20.27	205	11.9	77.3	205	32.7	64.2	1.2	0.6	1	0.3	0.33	0.64	0.01	0.01	0.01	0	8	281.9		6H	C2	4.7	5.36798
1	D	HIGH	1	785	12	0	518	785	3	1.29	3.61	5.8	0.318	1.61	18.26	330	12.3	88.2	217	21.7	77.3	0.6	0.2	0.2	0	0.28	0.99	0.01	0	0	0	7	254.1		HIGH	D1	20.6	4.26324		78.601	97.625	186.017
1	D	HIGH	1	785	12	0	518	785	6	1.16	3.53	5.6	0.303	1.59	18.45	280	12.5	85.9	222	28.6	70.1	0.6	0.2	0.4	0	0.33	0.81	0.01	0	0.01	0	7.5	263.4		HIGH	D1	19.7	5.00718		75.746	108.163	97.212
1	D	HIGH	1	785	12	0	518	785	12	0.46	3.06	4.8	0.264	1.58	18.33	154	14.7	86.3	218	18.2	79.2	1	0.5	0.8	0.2	0.08	0.36	0	0	0	0	6.2	191		HIGH	D1	29.6	4.5006
2	D	HIGH	0	455	12	0	524	455	3	1.38	3.61	6	0.295	1.65	20.21	342	10.8	81.8	223	3.6	94.7	0.7	0	0.9	0	0.05	1.31	0.01	0	0.01	0	8.3	298.8		HIGH	D2	12.6	5.17609		79.383	515.164	87.731
2	D	HIGH	0	455	12	0	524	455	6	0.84	2.73	4.7	0.225	1.72	20.84	270	11	82.4	215	5.8	90.2	2.6	1.3	0	0.1	0.05	0.76	0.02	0.01	0	0	7.2	196.6		HIGH	D2	17.4	5.65321		7.435	126.429	15.79
2	D	HIGH	0	455	12	0	524	455	12	0.84	2.43	4	0.199	1.64	19.98	172	12.8	82	200	3.5	95	0.3	0	1.1	0.1	0.03	0.8	0	0	0.01	0	5.1	124.2		HIGH	D2	22.2	5.88461
1	E	3H	0	877	12	0	508	877	3	2.58	3.63	5.9	0.326	1.63	18.21	380	10.9	89.8	221	34	64	0.2	1	0.8	0	0.88	1.65	0.01	0.03	0.02	0	6.6	238.8		3H	E1	12.5	3.5006		66.024	269.043	138.105
1	E	3H	0	877	12	0	508	877	6	2.6	3.57	5.9	0.303	1.64	19.34	328	10.7	84.8	222	55.1	42.6	0.4	1.2	0.7	0	1.43	1.11	0.01	0.03	0.02	0	6.3	223.9		3H	E1	1.9	3.76592		33.457	620.076	106.259
1	E	3H	0	877	12	0	508	877	12	3.15	303	4.7	0.253	1.57	18.77	297	11.1	83.6	212	50.6	46.2	0.7	1.8	0.4	0.3	1.6	1.46	0.02	0.06	0.01	0.01	5.1	155.5		3H	E1	2.7	5.12494
2	E	6H	1	1167	12	0	531	1167	3	1.13	3.07	4.9	0.256	1.61	19.26	258	10.3	83.3	211	19.6	78.7	0.7	0.6	0.2	0.1	0.22	0.89	0.01	0.01	0	0	8.1	247.9		6H	E2	13.2	5.33579		121.135	162.492	239.864
2	E	6H	1	1167	12	0	531	1167	6	0.44	2.86	4.6	0.248	1.6	18.49	222	10.9	86.5	217	29.8	67	1	1.7	0.6	0	0.13	0.29	0	0.01	0	0	8.2	233.8		6H	E2	12.4	5.17609		150.329	214.948	14.849
2	E	6H	1	1167	12	0	531	1167	12	0.84	3.14	4.9	0.253	1.55	19.24	150	13.2	80.4	196	35.3	63.2	0.6	0.4	0.5	0	0.3	0.53	0.01	0	0	0	7.4	231.4		6H	E2	4.8	5.16633
2	F	HIGH	0	737	11.75	1	540	737	3	1.72	3.43	5.5	0.292	1.6	18.8	325	10.8	85.2	216	28	71.1	0.4	0.3	0.1	0	0.48	1.23	0.01	0.01	0	0	9.5	326.3		HIGH	F2	15.3	5.8451		46.712	232.277	323.892
2	F	HIGH	0	737	11.75	1	540	737	6	0.69	3.16	5.2	0.269	1.66	19.44	278	11.3	85.3	219	17.6	81.2	0.7	0.2	0	0.2	0.12	0.56	0	0	0	0	9.5	300.2		HIGH	F2	12.4	6.26324		536.692	266.884	351.033
2	F	HIGH	0	737	11.75	1	540	737	12	6.22	2.06	4.5	0.174	2.17	25.61	217	12.1	84.6	171	54.8	36.3	5.9	0.2	2	0.9	3.41	2.26	0.37	0.01	0.12	0.05	0	0		HIGH	F2	26.2	6.06695
2	G	6H	1	505	12	0	537	505	3	2.37	3.65	6.6	0.329	1.8	20.03	245	11	90	227	35.7	63.3	0.4	0.2	0.3	0.2	0.85	1.5	0.01	0	0.01	0	6.7	244		6H	G2	10.5	5.26324		42.802	199.258	174.799
2	G	6H	1	505	12	0	537	505	6	0.89	3.15	5.7	0.276	1.81	20.61	233	10.6	87.8	220	43.8	54.7	0.4	0.8	0.3	0	0.39	0.49	0	0.01	0	0	7.4	232.4		6H	G2	11.9	5.76592		111.839	332.721	182.326
2	G	6H	1	505	12	0	537	505	12	1.07	2.84	4.9	0.237	1.73	20.7	137	12.2	83.6	209	62.7	33.6	2	0.5	0.7	0.6	0.67	0.36	0.02	0	0.01	0.01	5.3	150.3		6H	G2	0.8	5.29373
2	H	3H	0	953	12	0	530	953	3	1.65	4.2	6.6	0.359	1.58	18.51	270	10.8	85.6	227	49.3	48.9	1.2	0.3	0.2	0.1	0.81	0.81	0.02	0	0	0	7.2	302.4		3H	H2	12.9	5.33579		120.855	365.759	246.667
2	H	3H	0	953	12	0	530	953	6	0.53	3.88	6	0.303	1.56	19.95	231	10.8	78.1	229	39.4	56.8	1.1	2	0.2	0.5	0.21	0.3	0.01	0.01	0	0	7.7	297.4		3H	H2	1.6	5.76592		284.903	601.107	26.647
2	H	3H	0	953	12	0	530	953	12	0.64	3.16	4.8	0.244	1.54	19.85	190	13	77.4	210	49	47.3	0.8	2.3	0.6	0	0.31	0.3	0.01	0.01	0	0	6.7	210.9		3H	H2	2.4	5.17609
1	I	3H	0	1066	12	0	511	1066	3	2.73	4.33	6.9	0.386	1.59	17.78	350	10.9	89.3	226	52.3	47.1	0.1	0.4	0	0.1	1.43	1.29	0	0.01	0	0	5.8	248.8		3H	I1	8.2	3.65321		176.824	407.442	147.803
1	I	3H	0	1066	12	0	511	1066	6	0.75	4.29	6.9	0.362	1.61	19.04	281	10.5	84.5	225	33.3	63.3	2.3	0.6	0.5	0	0.25	0.48	0.02	0	0	0	5.8	249.2		3H	I1	2.5	4.60206		203.3	500.177	44.523
1	I	3H	0	1066	12	0	511	1066	12	1.11	3.6	5.6	0.297	1.55	18.76	225	12.3	82.6	203	23.7	74.9	0.4	0.5	0.3	0.1	0.26	0.83	0	0.01	0	0	5.6	199.8		3H	I1	1.8	4.36798
2	I	6H	0	778	12	0	542	778	3	1.39	3.97	6.3	0.334	1.59	18.91	303	11.8	84.1	222	32	67	0.5	0.1	0.4	0	0.44	0.93	0.01	0	0.01	0	8.2	325.1		6H	I2	16.5	5.79005		48.989	125.492	230.021
2	I	6H	0	778	12	0	542	778	6	0.38	3.67	5.8	0.309	1.58	18.8	237	12.3	84.3	218	13.7	85.4	0.7	0	0.3	0	0.05	0.32	0	0	0	0	7.2	264.8		6H	I2	24.3	5.98528		636.577	308.854	264.038
2	I	6H	0	778	12	0	542	778	12	1.94	3.23	5.3	0.277	1.63	18.96	185	14.9	85.8	186	34.3	61.3	3.2	0.4	0.3	0.5	0.67	1.19	0.06	0.01	0.01	0.01	5.8	188.4		6H	I2	4.8	5.68425
1	J	6H	1	1076	12	0	506	1076	3	2.01	4.42	7	0.41	1.59	17.16	350	11.7	92.7	228	18.2	80.8	0.7	0	0.2	0.1	0.36	1.62	0.01	0	0	0	6.4	283.6		6H	J1	9.6	3.82391		77.69	137.67	252.023
1	J	6H	1	1076	12	0	506	1076	6	0.64	3.95	6.1	0.335	1.55	18.2	294	11.4	85	230	29.6	65.8	1.8	1.8	0.2	0.8	0.19	0.42	0.01	0.01	0	0.01	7.5	294.7		6H	J1	8.2	4.33579		124.934	142.822	68.841
1	J	6H	1	1076	12	0	506	1076	12	0.6	3.3	5	0.269	1.5	18.43	222	12.8	81.6	209	36.6	58	1.3	2.7	0.9	0.5	0.22	0.35	0.01	0.02	0.01	0	7.3	238.9		6H	J1	3.1	4.10266
2	J	3H	1	786	12	0	541	786	3	1.64	3.13	5.2	0.267	1.65	19.34	263	12.4	85.5	216	42.3	56.9	0.2	0.5	0	0.2	0.7	0.93	0	0.01	0	0	8.4	263.9		3H	J2	17.8	5.39794		35.843	112.847	225.1
2	J	3H	1	786	12	0	541	786	6	0.72	2.93	4.8	0.243	1.65	19.84	229	11.7	83.2	214	26	71.8	1.9	0.2	0	0.2	0.19	0.51	0.01	0	0	0	8.2	239.9		3H	J2	2.8	5.56427		287.866	133.689	278.802
2	J	3H	1	786	12	0	541	786	12	1.01	2.61	4.3	0.216	1.65	19.89	149	14.5	82.9	198	46	52.3	0.8	0.3	0.5	0	0.46	0.53	0.01	0	0.01	0	6.6	171.9		3H	J2	2.8	4.80163
1	K	6H	1	1081	12	0	515	1081	3	1.81	4.16	6.8	0.358	1.63	18.99	412	10.5	86.1	222	28.6	69.3	0.2	1.3	0.4	0.1	0.52	1.26	0	0.02	0.01	0	7.9	326.9		6H	K1	8.5	5.30103		84.628	165.068	238.489
1	K	6H	1	1081	12	0	515	1081	6	0.37	3.88	6.1	0.343	1.58	17.89	288	11.7	88.3	225	42.2	50.3	1.8	5.8	0	0	0.16	0.19	0.01	0.02	0	0	6.3	243.8		6H	K1	7.4	4.92082		464.357	440.227	326.353
1	K	6H	1	1081	12	0	515	1081	12	0.73	3.51	5.3	0.29	1.52	18.38	300	11.5	82.6	211	46.3	50.9	0.5	2.3	0	0	0.34	0.37	0	0.02	0	0	7.1	247.6		6H	K1	3.2	5.12494
2	K	3H	0	465	12	0	525	465	3	1.63	3.72	5.8	0.31	1.57	18.84	332	11.4	83.3	226	22	77	0.4	0.1	0.6	0	0.36	1.25	0.01	0	0.01	0	10.3	383.9		3H	K2	18.4	5.26324		45.521	223.613	118.853
2	K	3H	0	465	12	0	525	465	6	1.07	3.07	4.9	0.242	1.59	20.1	254	11.6	78.9	222	39.1	59.5	0.3	0.5	0.4	0.3	0.42	0.64	0	0	0	0	9.1	279.5		3H	K2	3.3	5.63682		69.452	458.962	144.908
2	K	3H	0	465	12	0	525	465	12	0.91	2.49	4.1	0.192	1.64	21.25	161	13.1	77.1	205	14.2	84.6	0.1	0.3	0.7	0.1	0.13	0.77	0	0	0.01	0	7.6	190.5		3H	K2	8.7	5.42597
1	L	HIGH	1	1221	12	0	504	1221	3	2.14	4.44	6.9	0.375	1.56	18.49	256	10.2	84.3	224	37.5	59.1	1.5	1.8	0.2	0	0.8	1.26	0.03	0.04	0	0	5.7	255.2		HIGH	L1	13.8	3		142.782	249.607	236.245
1	L	HIGH	1	1221	12	0	504	1221	6	1.15	4.13	6.4	0.353	1.54	18.08	204	11.1	85.5	222	40	57.4	1.2	0.6	0.7	0.1	0.46	0.66	0.01	0.01	0.01	0	5.4	223.8		HIGH	L1	10.8	4.39794		109.59	184.974	205.414
1	L	HIGH	1	1221	12	0	504	1221	12	0.78	3.48	5.3	0.292	1.52	18.15	155	12.3	83.9	223	56.7	39.2	2.1	1.3	0.3	0.4	0.44	0.31	0.02	0.01	0	0	5.6	194.4		HIGH	L1	17.6	3.90309
1	M	6H	0	837	8.5	1	501	837	3	1.89	3.94	5.6	0.323	1.43	17.41	552	11.3	81.9	223	30.6	68.7	0.4	0.1	0.3	0	0.58	1.29	0.01	0	0.01	0	7.3	289.1		6H	M1	19.5	5.17609		96.903	128.771	197.018
1	M	6H	0	837	8.5	1	501	837	6	0.59	3.52	5.2	0.306	1.48	17.07	355	12.9	86.9	223	7.5	91.7	0.4	0.2	0.2	0	0.04	0.54	0	0	0	0	5.7	201.1		6H	M1	27.6	5.17609		1173.57	294.335	410.38
1	M	6H	0	837	8.5	1	501	837	12																										6H	M1		5.05436
2	M	HIGH	1	1034	12	0	535	1034	3	3.28	3.42	5.4	0.295	1.57	18.17	244	12.1	86.2	221	57.6	40.5	1.2	0.3	0.1	0.2	1.89	1.33	0.04	0.01	0	0.01	6	205.3		HIGH	M2	16.3	5.33579		11.776	179.353	122.616
2	M	HIGH	1	1034	12	0	535	1034	6	1.44	3.44	5.2	0.279	1.5	18.47	217	12	81	221	55.4	42	1.4	0.6	0.5	0	0.8	0.6	0.02	0.01	0.01	0	6.6	228.2		HIGH	M2	12	5.36798		36.802	370.885	399.741
2	M	HIGH	1	1034	12	0	535	1034	12	0.7	2.88	4.3	0.224	1.49	19.14	157	13.5	77.6	204	25.6	73	0.5	0.7	0	0.3	0.18	0.51	0	0	0	0	5.8	166.8		HIGH	M2	10.8	5.77815
1	N	6H	0	902	12	0	512	902	3	2.24	3.88	6	0.338	1.54	17.74	316	12.4	86.9	224	44.8	53.8	0.8	0.5	0.1	0	1	1.21	0.02	0.01	0	0	6.2	241.8		6H	N1	16	4.71321		124.229	284.967	194.34
1	N	6H	0	902	12	0	512	902	6	0.85	3.5	5.4	0.307	1.54	17.61	234	12.5	87.7	227	31.8	67.2	0.3	0.1	0.5	0.1	0.27	0.57	0	0	0	0	5	174.7		6H	N1	13.6	4.5006		92.066	231.809	121.748
1	N	6H	0	902	12	0	512	902	12	0.9	2.73	4.1	0.221	1.5	18.47	172	12.7	81.1	214	23.8	72.4	0.7	2.4	0.4	0.3	0.22	0.65	0.01	0.02	0	0	5.8	158.3		6H	N1	2.3	4.36798
2	N	6H	1	1050	12	0	526	1050	3	2.23	3.31	5.5	0.28	1.66	19.59	280	10.3	84.6	220	30.3	69.1	0.2	0.3	0.1	0.1	0.67	1.54	0	0.01	0	0	8.7	286.7		6H	N2	14.7	5.42597		106.016	280.05	376.943
2	N	6H	1	1050	12	0	526	1050	6	0.85	3.06	5.2	0.265	1.69	19.5	268	10.6	86.7	219	33	66.4	0.3	0.3	0	0	0.28	0.57	0	0	0	0	7.7	234.7		6H	N2	17.1	5.83463		144.807	228.765	37.069
2	N	6H	1	1050	12	0	526	1050	12	0.94	2.52	4.1	0.203	1.61	20.02	189	11.5	80.4	203	51.3	46.8	0.9	0.9	0	0.2	0.48	0.44	0.01	0.01	0	0	7.2	180.8		6H	N2	1.6	5.58358
1	O	6H	1	768	12	0	509	768	3	1.66	3.65	5.6	0.294	1.52	18.92	290	11.2	80.6	228	27.6	69.9	0.9	1.3	0.3	0	0.46	1.16	0.02	0.02	0.01	0	6.5	238.8		6H	O1	11.3	4.39794		75.228	146.334	251.155
1	O	6H	1	768	12	0	509	768	6	0.86	3.43	5.2	0.273	1.52	19.09	209	11.5	79.4	224	24.8	74.6	0.5	0	0.1	0	0.21	0.64	0	0	0	0	6.3	214.9		6H	O1	8.6	4.68425		18.734	121.043	61.097
1	O	6H	1	768	12	0	509	768	12	0.82	2.48	3.7	0.19	1.48	19.25	144	14.4	76.7	201	23	74.7	1.1	0.9	0.3	0	0.19	0.61	0.01	0.01	0	0	5.8	144		6H	O1	1.5	4.17609
2	O	3H	1	927	7.75	1	522	927	3	2.28	3.18	5.2	0.274	1.63	18.92	241	10.3	86.1	216	53.3	45.1	0.8	0.6	0.2	0.1	1.21	1.03	0.02	0.01	0	0	8.7	276		3H	O2	20.3			78.601	147.973	108.937
2	O	3H	1	927	7.75	1	522	927	6	1.81	3	4.9	0.242	1.63	20.23	192	10.5	80.8	217	47.6	51.3	0.4	0.4	0.2	0	0.86	0.93	0.01	0.01	0	0	8.4	252.2		3H	O2	7.9			140.725	350.627	115.451
2	O	3H	1	927	7.75	1	522	927	12	2.59	3.3	5.3	0.265	1.6	19.93	163	11.5	80.3	199	43.2	54.7	0.6	0.9	0.4	0.1	1.12	1.42	0.02	0.02	0.01	0	8.3	275.2		3H	O2		5.69897
1	P	HIGH	1	1140	12	0	513	1140	3	1.56	4.58	6.8	0.383	1.48	17.64	387	12.5	83.7	222	31.5	67.1	0.6	0.5	0.2	0	0.49	1.05	0.01	0.01	0	0	4.3	194.7		HIGH	P1	11.3	4.17609		114.434	122.682	209.756
1	P	HIGH	1	1140	12	0	513	1140	6	0.48	4.41	6.5	0.368	1.47	17.65	333	12.3	83.4	224	13.2	84.5	0.2	1.6	0.3	0.2	0.06	0.4	0	0.01	0	0	3.7	164.4		HIGH	P1	5.8	4.42597		613.832	301.594	95.331
1	P	HIGH	1	1140	12	0	513	1140	12	3.29	4.66	6.7	0.368	1.45	18.33	306	13.4	79	202	54.3	42.2	0.8	0.8	1.4	0.6	1.79	1.39	0.03	0.03	0.05	0.02	4.3	202.5		HIGH	P1	12.4	5.03476
2	P	HIGH	1	1296	12	0	533	1296	3	2.96	3.35	5.9	0.299	1.76	19.67	397	10.5	89.5	221	17.9	81.4	0.5	0.1	0.1	0	0.53	2.41	0.02	0	0	0	9.3	310.2		HIGH	P2	7	4.60206		37.104	166.942	338.946
2	P	HIGH	1	1296	12	0	533	1296	6	1.37	3.15	5.4	0.278	1.73	19.58	330	10.7	88.4	222	41	58.3	0.1	0.2	0.4	0	0.56	0.8	0	0	0.01	0	8.6	269.5		HIGH	P2	6.1	3.69897		99.473	262.252	19.988
2	P	HIGH	1	1296	12	0	533	1296	12	2.03	2.77	4.6	0.237	1.67	19.51	260	11.4	85.8	224	67	30.9	0.2	1.2	0.2	0.5	1.36	0.63	0	0.03	0	0.01	9.1	252		HIGH	P2	6.8	4
2	Q	6H	1	827	12	0	543	827	3	1.76	3.48	5.9	0.302	1.7	19.59	297	10.5	86.6	220	26.8	72.5	0.4	0.2	0.1	0.1	0.47	1.27	0.01	0	0	0	8.3	289.2		6H	Q2	15.9	5.727		42.92	178.417	419.283
2	Q	6H	1	827	12	0	543	827	6	0.59	3.37	5.7	0.3	1.7	19.01	278	10.7	89.2	225	12.6	86.5	0.7	0.2	0	0	0.07	0.51	0	0	0	0	7.9	264.9		6H	Q2	17.9	6.42597		428.303	246.796	412.407
2	Q	6H	1	827	12	0	543	827	12	1.55	2.89	4.8	0.247	1.67	19.51	202	13.2	85.6	198	18.5	80.3	0.5	0.4	0.3	0	0.29	1.24	0.01	0.01	0.01	0	6	173.9		6H	Q2	2.3	5.58358
1	R	3H	1	634	12	0	519	634	3	1.71	3.96	5.9	0.315	1.48	18.67	317	13.5	79.5	219	43.3	55	1.1	0.2	0.3	0	0.74	0.94	0.02	0	0.01	0	6.8	268.3		3H	R1	19.9	4.8653		135.449	142.353	223.652
1	R	3H	1	634	12	0	519	634	6	0.54	3.44	5	0.269	1.46	18.74	214	13.3	78.2	222	27.6	70.6	1.1	0	0.7	0	0.15	0.38	0.01	0	0	0	5.7	197.4		3H	R1	6.4	5.04139		258.358	473.715	274.242
1	R	3H	1	634	12	0	519	634	12	0.85	2.95	4.1	0.22	1.4	18.76	182	13.9	74.6	209	36.5	60.4	2	1.1	0	0	0.31	0.51	0.02	0.01	0	0	6.2	182.2		3H	R1	1.4	4.36798
2	R	6H	0	734	8.75	1	523	734	3	1.86	2.52	4.3	0.221	1.7	19.35	261	10.6	87.7	209	28.4	70.7	0.5	0.1	0.2	0.1	0.53	1.32	0.01	0	0	0	8	201.3		6H	R2	19	5.22185		27.122	149.613	176.319
2	R	6H	0	734	8.75	1	523	734	6	1.14	2.43	4	0.212	1.66	19.03	236	10.8	87.5	213	35.3	63.8	0.4	0.4	0.1	0	0.4	0.73	0	0	0	0	6.9	167.3		6H	R2	15.6	5.56427		14.127	147.51	215.763
2	R	6H	0	734	8.75	1	523	734	12	1.93	2.06	3.4	0.175	1.66	19.56	179	12.6	84.8	193	24.8	73.4	0.2	1.2	0.5	0	0.48	1.42	0	0.02	0.01	0	8.4	172.7		6H	R2		5.33579
1	S	HIGH	0	953	12	0	507	953	3	1.19	4.1	6.3	0.349	1.53	17.94	386	10.7	85.1	218	25.3	73.5	0.3	0.1	0.6	0.1	0.3	0.87	0	0	0.01	0	6.9	282		HIGH	S1	14.1	4.94612		176.974	277.005	249.924
1	S	HIGH	0	953	12	0	507	953	6	0.41	3.96	5.9	0.335	1.48	17.56	290	11.3	84.5	222	17.1	80.9	0.3	0.7	0.3	0.7	0.07	0.33	0	0	0	0	5.8	228.1		HIGH	S1	15.1	5.04792		590.13	651.222	77.816
1	S	HIGH	0	953	12	0	507	953	12	0.89	3.41	5.1	0.273	1.49	18.56	205	11.9	80.2	200	34.2	63.2	0.6	0.6	0.6	0.9	0.3	0.56	0.01	0.01	0.01	0.01	5.5	188.1		HIGH	S1	14.1	5.00718
2	S	HIGH	1	773	12	0	538	773	3	2.32	3.08	5.1	0.267	1.67	19.28	277	10.9	86.6	219	31.5	67.6	0.5	0.2	0.2	0.1	0.73	1.57	0.01	0	0	0	8.3	255.3		HIGH	S2	14.9	5.30103		56.784	166.005	207.802
2	S	HIGH	1	773	12	0	538	773	6	0.82	3	5	0.252	1.65	19.72	230	10.9	83.9	223	38.2	61.1	0.3	0	0.3	0.1	0.31	0.5	0	0	0	0	8.4	250.9		HIGH	S2	10	4.92082		162.155	245.542	236.173
2	S	HIGH	1	773	12	0	538	773	12	0.56	2.59	4.1	0.211	1.59	19.57	167	12.5	81.4	208	37.7	59.9	0.7	0.7	0.7	0.4	0.21	0.34	0	0	0	0	6.7	172.6		HIGH	S2	18.9	5.12494
1	T	3H	1	1100	12	0	514	1100	3	1.87	4.56	6.9	0.395	1.51	17.48	395	11.6	86.6	225	32.6	65.2	0.9	1	0.2	0.1	0.61	1.22	0.02	0.02	0	0	4.9	224.3		3H	T1	12.5	4.47712		115.685	161.556	194.34
1	T	3H	1	1100	12	0	514	1100	6	0.44	4.46	6.4	0.342	1.44	18.81	288	10.9	76.7	223	14.6	83.5	1.6	0.3	0	0	0.06	0.37	0.01	0	0	0	6.4	286.4		3H	T1	2.2	4.77815		365.714	364.588	326.497
1	T	3H	1	1100	12	0	514	1100	12	2.29	5.53	6.5	0.34	1.45	19.25	246	12.5	75.2	200	51.5	45.4	0.9	0	1.5	0.7	1.18	1.04	0.02	0	0.03	0.02	6	273.5		3H	T1	2.3	5.05436
2	T	3H	0	1034	12	0	528	1034	3	2.68	3.15	5.2	0.278	1.66	18.75	327	10.7	88.3	220	40.6	58.5	0.4	0.4	0	0	1.09	1.57	0.01	0.01	0	0	9.1	286.2		3H	T2	12.9	5.4523		46.951	353.113	173.134
2	T	3H	0	1034	12	0	528	1034	6	1.18	3.12	5.2	0.264	1.65	19.58	260	10.9	84.5	221	36.7	61.7	0.4	0.8	0.2	0.1	0.43	0.73	0	0.01	0	0	8.1	252		3H	T2	2.2	5.24715		123.665	225.486	21.363
2	T	3H	0	1034	12	0	528	1034	12	1	2.22	3.7	0.19	1.65	19.27	172	13.4	85.6	189	9.5	89.4	0.2	0.5	0.3	0.1	0.09	0.89	0	0	0	0	7.1	157.6		3H	T2	2.3	5.47712
2	U	HIGH	0	623	12	0	529	623	3	2.47	2.63	4.3	0.229	1.64	18.78	309	10.6	87.3	217	42.1	56.4	0.5	0.8	0.2	0	1.04	1.39	0.01	0.02	0	0	10.3	269.4		HIGH	U2	15.5	5.61979		50.436	288.948	285.967
2	U	HIGH	0	623	12	0	529	623	6	1.28	2.41	4.1	0.206	1.7	19.9	261	10.9	85.5	217	55	44.1	0.5	0.3	0.1	0	0.7	0.56	0.01	0	0	0	9.6	230.2		HIGH	U2	13.3	5.88461		40.693	262.252	6.671
2	U	HIGH	0	623	12	0	529	623	12	0.62	1.92	3.2	0.165	1.68	19.62	179	12.4	85.8	203	35.1	62.1	1.5	0.4	0.6	0.2	0.22	0.39	0.01	0	0	0	7.4	142.3		HIGH	U2	24.3	5.10266
1	V	3H	1	884	12	0	517	884	3	3.95	3.72	5.8	0.314	1.56	18.44	287	11.1	84.5	222	62.7	36.2	0.3	0.7	0.2	0	2.48	1.43	0.01	0.03	0.01	0	7.4	275		3H	V1	16.7	4		80.558	121.043	139.769
1	V	3H	1	884	12	0	517	884	6	2.26	3.15	4.7	0.25	1.5	18.86	218	10.3	79.4	220	60.1	38.2	0.1	1.5	0.1	0	1.36	0.87	0	0.03	0	0	8.4	265.7		3H	V1	1.7	3.92082		57.401	543.5	169.66
1	V	3H	1	884	12	0	517	884	12																										3H	V1	1.9	3.30103
2	V	HIGH	1	878	12	0	527	878	3	2.14	3.69	5.6	0.303	1.52	18.45	277	11.4	82.1	222	39.9	59.4	0.5	0.1	0.1	0	0.85	1.27	0.01	0	0	0	7.1	262.6		HIGH	V2	17.1	5.29373		38.025	189.189	197.452
2	V	HIGH	1	878	12	0	527	878	6	0.85	3.34	5.1	0.273	1.53	18.75	235	11.4	81.6	222	48.6	49.5	0.9	0.5	0.2	0.3	0.41	0.42	0.01	0	0	0	7	235		HIGH	V2	19.3	5.58358		58.266	331.803	54.945
2	V	HIGH	1	878	12	0	527	878	12	0.53	2.59	3.9	0.211	1.5	18.48	181	12.9	81.2	203	27.1	70.5	0.5	0.5	1	0.5	0.14	0.37	0	0	0.01	0	6.3	162.7		HIGH	V2	28.6	5.60206
2	X	3H	0	1055	10.75	1	532	1055	3	1.8	3.6	5.6	0.29	1.56	19.32	269	10.7	80.5	218	39.2	59.4	1.2	0.1	0.1	0	0.71	1.07	0.02	0	0	0	7.1	257		3H	X2	12.3	5.9927		56.168	151.018	268.67
2	X	3H	0	1055	10.75	1	532	1055	6	0.51	3.82	5.8	0.293	1.52	19.85	223	11	76.8	222	15.2	79.2	1.1	3.7	0.8	0	0.08	0.4	0.01	0.02	0	0	6.6	253.4		3H	X2	1.4	5.68425		291.659	195.043	352.191
2	X	3H	0	1055	10.75	1	532	1055	12	7.53	3.5	5.5	0.284	1.58	19.51	201	13.6	81.1	182	59.6	34.9	2.6	0.6	1.7	0.6	4.49	2.63	0.2	0.04	0.13	0.05	5.2	182.9		3H	X2	3	5.94612
1	Y	3H	0	1243	10.5	1	503	1243	3	1.48	4.46	6.5	0.362	1.45	17.89	361	12.4	81.1	223	18.3	80	1	0.3	0.3	0.1	0.27	1.18	0.01	0.01	0.01	0	5	223.1		3H	Y1	13.8	5.06695		171.881	301.828	385.773
1	Y	3H	0	1243	10.5	1	503	1243	6	0.5	4.7	6.6	0.377	1.4	17.5	218	13.4	80.2	227	7.8	83.8	2.6	0	0.8	5	0.04	0.42	0.01	0	0	0.02	5.3	251.1		3H	Y1	2.8	4.82391		3250.44	1578.57	829.289
1	Y	3H	0	1243	10.5	1	503	1243	12	1.54	4.22	6.2	0.326	1.47	18.99	143	13.7	77.3	212	30.5	67.8	0.9	0.2	0.7	0	0.47	1.05	0.01	0	0.01	0	4.9	205.6		3H	Y1	2.6	4.66901
1	Z	HIGH	1	1050	10	1	502	1050	3	1.64	4.3	6.6	0.357	1.53	18.37	346	11.8	83.2	229	32.5	66.6	0.5	0.2	0.2	0	0.53	1.09	0.01	0	0	0	5.5	236.2		HIGH	Z1	11.7	5.17609		80.427	169.049	198.827
1	Z	HIGH	1	1050	10	1	502	1050	6	0.44	4	6.2	0.333	1.54	18.56	239	12.9	83.2	226	45.2	52.9	1.1	0.7	0	0	0.2	0.23	0	0	0	0	4.4	176.7		HIGH	Z1	10.6	5.33579		420.812	311.664	183.556
1	Z	HIGH	1	1050	10	1	502	1050	12	1.05	4.21	6.4	0.35	1.52	18.25	241	13.4	83.3	197	21.9	75.8	0.6	0.3	1	0.3	0.23	0.8	0.01	0	0.01	0	4.8	200.9		HIGH	Z1	22.5	4.68425
