# Supplementary material for: Altered hepatic metabolism mediates sepsis preventive effects of reduced glucose supply in infected preterm newborns
Source: eLife. 2025 Feb 24;13:RP97830. doi: 10.7554/eLife.97830 (PMC11850001; doi:10.7554/eLife.97830)
Supplement: Source data 1. [file elife-97830-data1.xlsx]

## Sheet: Survival and Gross pathology
ID	Kill nr	Letter	Litter	Group	Sex	Birth weight (g)	Inncoulation time	Euthansia time	Lifespan	Lifespan (nearest quarter)	Cause of death	Died of Sepsis	Moved up euthanasia scheduel	Skin bleeding	Kidney pathology	Spleen pathology	Lung pathology	Liver pathology	REMOVE	Comments
A1	999	A	1	LOW-IAIP	M	803	12:00:00	13:15:00	01:15:00	1.25	Birth complications	0							1	Should be removed from dataset completely			12:00:00
B1	101	B	1	HIGH-SE	F	1222	12:05:00	04:30:00	16:25:00	16.5	Sepsis	1
C1	109	C	1	LOW-PLACEBO	F	1065.9	12:10:00	10:30:00	22:20:00	22.25	Euthanised on scheduel	0
D1		D	1	LOW-PLACEBO	F	1224	12:35:00	13:15:00	00:40:00	0.75	Iatrogenic, perforeted catheter	0							1	Should be removed from dataset completely
E1	108	E	1	LOW-PLACEBO	M	1174	13:15:00	10:20:00	21:05:00	21	Euthanised on scheduel	0		0	0	0		0
F1	105	F	1	HIGH-SE	F	1038.5	12:30:00	09:25:00	20:55:00	21	Sepsis	1		1	0	1		1
G1	106	G	1	LOW-PLACEBO	F	932.1	13:00:00	10:00:00	21:00:00	21	Euthanised on scheduel	0		0	0	1		1
H1	111	H	1	HIGH-CON	M	1165	12:20:00	10:50:00	22:30:00	22.5	Euthanised on scheduel	0		0	0	0		0
I1	107	I	1	HIGH-SE	M	1075	12:55:00	10:10:00	21:15:00	21.25	Euthanised on scheduel	0		0	0	1		1
J1	100	J	1	LOW-IAIP	M	1324.5	12:25:00	02:30:00	14:05:00	14	Sepsis	1
K1	110	K	1	LOW-CON	M	1206.8	12:15:00	10:40:00	22:25:00	22.5	Euthanised on scheduel	0
L1	113	L	1	HIGH-CON	F	1129	12:45:00	11:10:00	22:25:00	22.5	Euthanised on scheduel	0		0	0	0		0
M1	114	M	1	LOW-IAIP	F	1191	12:50:00	11:20:00	22:30:00	22.5	Euthanised on scheduel	0		0	0	0		0
N1	102	N	1	HIGH-SE	M	1468	13:10:00	05:15:00	16:05:00	16	Sepsis, shock, died before euthansia	1
O1	103	O	1	LOW-PLACEBO	M	1314.8	13:25:00	06:15:00	16:50:00	16.75	Sepsis	1
P1		P	1	LOW-IAIP	M	981	13:05:00	19:00:00	05:55:00	6	Severe atelectasis, mix of bith complications and Sepsis	0							1	Should be removed from dataset completely
R1	104	R	1	LOW-IAIP	F	988.2	13:20:00	09:15:00	19:55:00	20	Sepsis + Abdominal bleeding	1		1	0	0		0		Discussed if it should be removed from analysis, decided to keep it in
S1	112	S	1	LOW-CON	F	1004	12:40:00	11:00:00	22:20:00	22.25	Euthanised on scheduel	0		0	0	1		0
A2	117	A	2	LOW-IAIP	m	1210	13:30:00	02:15:00	12:45:00	12.75	Sepsis	1		0	0	1	0	0
B2	123	B	2	LOW-IAIP	f	1015	13:55:00	09:10:00	19:15:00	19.25	Euthanised on scheduel, ph<7.1 at kill	1	1	0	1	0	0	0
C2	126	C	2	LOW-IAIP	f	1210	13:50:00	09:40:00	19:50:00	19.75	Euthanised on scheduel	0	1	0	0	0	1	0
D2	136	D	2	LOW-PLACEBO	f	1041	12:55:00	11:20:00	22:25:00	22.5	Euthanised on scheduel	0		0	0	0	0	1
E2	133	E	2	LOW-PLACEBO	f	1260.6	12:30:00	10:50:00	22:20:00	22.25	Euthanised on scheduel	0		1	0	0	0	0
F2	119	F	2	HIGH-SE	m	1189	13:45:00	02:50:00	13:05:00	13	Sepsis	1		0
G2	135	G	2	HIGH-CON	f	1387	12:45:00	11:10:00	22:25:00	22.5	Euthanised on scheduel	0		0	0	0	0	1
H2	999	H	2	HIGH-SE	m	1243	13:25:00	19:30:00	06:05:00	6	Lost cathether, euthanised because it could not receive PN	0
I2	132	I	2	HIGH-CON	m	1015.2	12:20:00	10:40:00	22:20:00	22.25	Euthanised on scheduel	0		0	0	0	0	1
J2	128	J	2	LOW-IAIP	f	678	12:00:00	10:00:00	22:00:00	22	Euthanised on scheduel	0		0	1	0	1	0
K2	141	K	2	LOW-PLACEBO	m	1405	14:15:00	12:10:00	21:55:00	22	Euthanised on scheduel	0		0	0	0	1	1
L2	131	L	2	LOW-CON	m	1202.8	12:15:00	10:30:00	22:15:00	22.25	Euthanised on scheduel	0		0	0	0	0	0
M2	140	M	2	LOW-IAIP	m	1261	14:10:00	12:00:00	21:50:00	21.75	Euthanised on scheduel	0		0	0	0	1	1
N2	115	N	2	HIGH-SE	m	791	14:05:00	00:30:00	10:25:00	10.5	Sepsis	1		1	0	1	0	0
O2	134	O	2	LOW-CON	m	1031	12:40:00	11:00:00	22:20:00	22.25	Euthanised on scheduel	0		0	0	0	0	0
P2	129	P	2	LOW-IAIP	f	1098.7	13:35:00	10:10:00	20:35:00	20.5	Euthanised on scheduel, ph<7.1 at kill	1	1	1	0	0	0	1
Q2	124	Q	2	HIGH-SE	f	793.5	13:00:00	09:20:00	20:20:00	20.25	Euthanised on scheduel, died of sedation, pH<7.1 at kill	1	1	0	0	0	0	0
R2	118	R	2	HIGH-SE	f	1303	12:10:00	02:35:00	14:25:00	14.5	Sepsis	1		1	0	1	0	1
S2	125	S	2	LOW-IAIP	m	1327	12:50:00	09:30:00	20:40:00	20.75	Euthanised on scheduel	0	1	0	0	0	0	0
T2	138	T	2	HIGH-CON	m	1193	13:10:00	11:40:00	22:30:00	22.5	Euthanised on scheduel, OBS Severe blood loss before euthanasia due to leaky cathther, disregard blood samples	0		0	0	1	0	1		Samples from Time=22 should be ignored because of blood loss
U2	121	U	2	LOW-PLACEBO	m	741.5	13:20:00	07:35:00	18:15:00	18.25	Euthanised on scheduel	0	1	1	1	1	0	0
V2	127	V	2	LOW-PLACEBO	m	1281	13:40:00	09:50:00	20:10:00	20.25	Euthanised on scheduel	0		0	1	0	1	0
X2	139	X	2	LOW-PLACEBO	m	1111	14:00:00	11:50:00	21:50:00	21.45	Euthanised on scheduel	0		0	0	1	0	1
Y2	122	Y	2	HIGH-SE	m	1340.4	12:35:00	09:00:00	20:25:00	20.5	Euthanised on scheduel, ph<7.1 at kill	1	1	1	1	0	0	0
Z2	116	Z	2	LOW-IAIP	f	1270	13:15:00	01:15:00	12:00:00	12	Sepsis	1		0	0	1	0	1
Æ2	120	Æ	2	LOW-IAIP	m	1180.8	12:25:00	03:15:00	14:50:00	14.75	Sepsis	1
Ø2	137	Ø	2	LOW-CON	f	1275	13:05:00	11:30:00	22:25:00	22.5	Euthanised on scheduel	0		0	0	0	0	1
Å2	130	Å	2	LOW-PLACEBO	m	902	12:05:00	10:20:00	22:15:00	22.25	Euthanised on scheduel	0		0	0	0	1	0
A3	150	A	3	HIGH-SE	f	725	13:25:00	04:55:00	15:30:00	15.5	Sepsis	1		0	0	1	0	1
ALPHA3	149	ALPHA	3	LOW-IAIP	m	847	13:50:00	04:35:00	14:45:00	14.75	Sepsis	1		0	1	1	0	1
B3	143	B	3	HIGH-SE	f	794	13:00:00	21:55:00	08:55:00	9	Sepsis	1		0	0	1	1	1
BETA3	153	BETA	3	LOW-IAIP	m	777	12:00:00	09:00:00	21:00:00	21	Euthanised on scheduel	0	1	0	0	1	0	1
D3	145	D	3	HIGH-SE	m	949.7	12:10:00	01:30:00	13:20:00	13.25	Sepsis	1		0	0	1	0	1
G3	164	G	3	LOW-CON	f	993	13:05:00	10:50:00	21:45:00	21.75	Euthanised on scheduel	0		0	0	0	0	1
GAMMA3	148	GAMMA	3	HIGH-SE	m	1159	13:45:00	04:15:00	14:30:00	14.5	Sepsis	1		0	1	1	0	0
H3	146	H	3	HIGH-SE	f	1104	14:00:00	02:05:00	12:05:00	12	Sepsis	1		0	0	1	0	1
I3	152	I	3	LOW-IAIP	f	996	13:15:00	05:30:00	16:15:00	16.25	Sepsis	1		0	0	1	0	1
J3	155	J	3	HIGH-SE	m	885	12:35:00	09:20:00	20:45:00	20.75	Euthanised on scheduel	0	1	0	0	1	0	1
K3	161	K	3	HIGH-CON	f	984	12:20:00	10:20:00	22:00:00	22	Euthanised on scheduel	0		0	0	0	0	1
L3	151	L	3	LOW-IAIP	m	1175	12:50:00	05:15:00	16:25:00	16.5	Sepsis	1		0	0	1	1	1
N3	159	N	3	LOW-PLACEBO	m	1219	13:55:00	10:00:00	20:05:00	20	Euthanised on scheduel	0	1	0	0	1	0	1
O3	157	O	3	LOW-PLACEBO	f	849	12:30:00	09:40:00	21:10:00	21.25	Euthanised on scheduel, OBS : not affetcted by SE, possible that it was innoculated with saline or wrong dose	0	1	0	0	0	0	0	1	Should be removed from dataset completely
P3	999	P	3	LOW-CON	m	1279	13:30:00	03:00:00	13:30:00	13.5	Iatrogenic - Died of blood loss from leaky cathther	0
Q3	165	Q	3	HIGH-CON	m	676	13:10:00	11:00:00	21:50:00	21.75	Euthanised on scheduel	0		0	0	0	0	1
R3	160	R	3	LOW-CON	m	637	12:15:00	10:10:00	21:55:00	22	Euthanised on scheduel	0		0	0	0	0	1
T3	144	T	3	LOW-PLACEBO	m	1017	13:20:00	22:10:00	08:50:00	8.75	Sepsis	1		0	0	1	0	1
U3	142	U	3	LOW-PLACEBO	f	909	12:05:00	21:40:00	09:35:00	9.5	Sepsis	1		0	0	0	1	1
V3	158	V	3	LOW-PLACEBO	f	795	13:40:00	09:50:00	20:10:00	20.25	Euthanised on scheduel	0	1	0	0	0	0	1
X3	162	X	3	LOW-CON	f	828	12:40:00	10:30:00	21:50:00	21.75	Euthanised on scheduel	0		0	0	0	0	1
Y3	156	Y	3	LOW-PLACEBO	f	702	12:55:00	09:30:00	20:35:00	20.5	Euthanised on scheduel, pH<7.1 at kill	1	1	0	0	1	0	1
Æ3	163	Æ	3	HIGH-CON	f	908	12:45:00	10:40:00	21:55:00	22	Euthanised on scheduel	0		0	1	0	0	1
Ø3	154	Ø	3	LOW-IAIP	f	826	13:35:00	09:10:00	19:35:00	19.5	Euthanised on scheduel	0	1	0	0	0	0	0
Å3	147	Å	3	LOW-IAIP	f	970	12:25:00	02:30:00	14:05:00	14	Sepsis	1

## Sheet: Blood Gas
ID	Killnr	Letter	Litter	Group	Sex	Birthweightg	IAIP	SE	HighGlucose	Timestamp	Time	StandardTime	Killsample	LaterKillsample	PatientID	tHb (mmol/L)	pH	pCO2 (kPa)	pO2 (kPa)	tHb (mmol/L)	sO2 (%)	O2Hb (%)	COHb (%)	RHb (%)	MetHb (%)		K+ (mmol/L)	Na+ (mmol/L)	Ca++ (mmol/L)	Cl- (mmol/L)	Glu (mmol/L)	Lac (mmol/L)		tO2 (Vol%)	p50(act) (kPa)	cBase(Ecf) (mmol/L)	SBC (mmol/L)	B (kPa)	Anion gap (mmol/L)	Anion gap (K+) (mmol/L)	O2CAP (Vol%)	cBase(B) (mmol/L)	Ca(7.4) (mmol/L)	HCO3- (mmol/L)	tCO2(B) (Vol%)	tCO2(P) (Vol%)	Hct (%)	pH(st)	pO2(A) (kPa)
A1		A	1	LOW-IAIP	M	803	1	1	0	10/5/2021 11:55	0	0			A 0H	4.4	7.104	7.39	4.97	4.4	73.1	70.6	2.6	26	0.8		3.6	135	1.6	96	10.7	13.5		7.1	3.42	-12.2	15	100.4	21.7	25.3	9.5	-11.4	1.36	17.4	40.2	42.7	21.7	7196	11.43
B1		B	1	HIGH-SE	F	1222	0	1	1	10/5/2021 11:57	0	0			B 0H	5	7.113	10	16.7	5	104.9	100.5	3.2	-4.7	1		5.9	117	1.32	80	143	1.2				-5.4		100.4	13	18.9	10.7	-5.5	1.13	24.1		59.1	24.5	7300	8.44
C1		C	1	LOW-PLACEBO	F	1065.9	0	1	0	10/5/2021 11:58	0	0			C 0H	5.1	7.116	10.2	10.6	5.1	97.5	95.8	1.4	2.5	0.3		5.7	141	0.98	98	32	1.2		11.2	3.96	-4.9	20.1	100.4	18.5	24.2	11.3	-5.1	0.84	24.5	55.7	60.2	25.2	7307	8.310000000000001
D1		D	1	LOW-PLACEBO	F	1224	0	1	0	10/5/2021 12:00	0	0			D 0H	4.6	6.848	11.1	6.09	4.6	69.8	67.3	2.7	29.1	0.9		3.4	157	1.35	115	4.1	19		7.1	4.5	-19.3	10.2	100.4	27.9	31.3	9.9	-18.3	0.99	14.5	36.4	38.2	22.7	7027	7.21
E1	108	E	1	LOW-PLACEBO	M	1174	0	1	0	10/5/2021 12:01	0	0			E 0H	6	7.33	8.46	7.22	6	92.8	91.2	1.4	7.1	0.3		4.9	135	1.4	95	11.4	2		12.5	2.78	7.5	29.9	100.4	6.2	11.2	13.3	6.1	1.34	33.4	71.3	79.2	29.8	7479	10.22
F1	105	F	1	HIGH-SE	F	1038.5	0	1	1	10/5/2021 12:17	0	0			F 0H	5.6	7.364	7.04	2.83	5.6	47.4	46.7	1.1	51.8	0.4		3.2	141	1.16	103	2.4	3.5		5.9	2.95	4.7	27.2	100.4	7.7	10.9	12.3	4	1.14	30.1	65	71	27.5	7453	11.83
G1	106	G	1	LOW-PLACEBO	F	932.1	0	1	0	10/5/2021 12:04	0	0			G 0H	6.3	7.372	7.82	6.98	6.3	91.7	90.3	1.4	8.2	0.1		2.8	169	0.82	115	4.5	1.2		12.9	2.85	8.8	31.1	100.4	19.9	22.7	13.9	7.4	0.8	34.1	71.8	80.4	31.1	7497	10.95
H1	111	H	1	HIGH-CON	M	1165	0	0	1	10/5/2021 12:08	0	0			H 0H	5.8	7.431	6.7	7.05	5.8	94.8	93.4	1.2	5.1	0.3		4	156	0.95	107	14.2	1.8		12.4	2.31	9.1	31.8	100.4	15.5	19.5	12.9	8	0.96	33.4	70.3	78.3	28.8	7507	12.21
I1	107	I	1	HIGH-SE	M	1075	0	1	1	10/5/2021 12:08	0	0			I 0H	6.8	7.259	8.26	21.3	6.8	100.5	99.9	0.6	-0.5	0		5.3	123	1.28	87	83	1.2		15.7	3.3	0.7	24.2	100.4	8.5	13.9	15.2	-0.3	1.18	27.8	59.2	66.5	33.7	7390	10.45
J1		J	1	LOW-IAIP	M	1324.5	1	1	0	10/5/2021 12:10	0	0			J OH	4.8	7.347	7.79	6.62	4.8	93.8	90	3.4	5.9	0.7		3.5	139	1.32	95	6.4	3.8		9.8	2.31	6.3	29.4	100.4	11.6	15	10.3	5.5	1.28	32	69.7	75.7	23.7	7473	10.98
K1		K	1	LOW-CON	M	1206.8	0	0	0	10/5/2021 12:11	0	0			K OH	5.2	7.245	9.28	3.94	5.2	62.2	60.9	1.5	37	0.6		4.8	132	1.24	90	16.4	2.5		7.3	3.26	2.8	25.7	100.4	11.2	16	11.5	2	1.14	30.1	66.7	72.3	25.9	7421	9.300000000000001
L1	113	L	1	HIGH-CON	F	1129	0	0	1	10/5/2021 12:13	0	0			L 0H	6.4	7.37	8.21	4.6	6.4	77	75.8	1.3	22.6	0.3		4.1	139	1.27	96	14.7	1.6		10.9	2.91	10.3	32	100.4	7.4	11.5	14	8.7	1.25	35.6	75.3	84	31.4	7512	10.5
M1	114	M	1	LOW-IAIP	F	1191	1	1	0	10/5/2021 12:14	0	0			M 0H	6.1	7.421	7.46	7.22	6.1	94.3	93	1.3	5.6	0.1		3.5	145	1.18	97	3.3	1		12.8	2.48	11.9	34	100.4	11.2	14.7	13.4	10.3	1.2	36.3	76.3	85.2	30	7534	11.35
N1		N	1	HIGH-SE	M	1468	0	1	1	10/5/2021 12:14	0	0			N 0H	4.7	7.39	7.62	36.7	4.7	105.9	101.7	3.2	-5.7	0.8		3.2	141	1.31	98	14.7	1.2				9.6		100.4	8.5	11.7	10.1	8.6	1.3	34.6		81.4	23.1	7512	11.17
O1		O	1	LOW-PLACEBO	M	1314.8	0	1	0	10/5/2021 12:17	0	0			O 0H	5.8	7.481	6.75	40	5.8	101.1	100.4	0.7	-1.1	0		3	144	1.23	97	5.3	1.9		13.8	2.62	14.2	36.6	100.4	9	12	12.9	12.7	1.28	37.7	78.9	88.1	28.5	7562	12.16
P1		P	1	LOW-IAIP	M	981	1	1	0	10/5/2021 12:20	0	0			P 0H	5.7	7.361	7.53	4.41	5.7	72.7	71.3	1.6	26.8	0.3		4.2	138	1.14	95	10.4	3.4		9.1	3.04	6.5	29	100.4	11	15.2	12.4	5.5	1.12	31.9	68.6	75.5	27.9	7473	11.27
R1	104	R	1	LOW-IAIP	F	988.2	1	1	0	10/5/2021 12:20	0	0			R 0H	4	7.289	6.87	4.78	4	78.3	75.6	2.8	20.9	0.7		3.7	152	1.31	106	10.9	8.3		6.9	2.93	-1.9	22.7	100.4	20.7	24.4	8.7	-1.8	1.23	24.7	55.1	58.8	19.9	7370	12.02
S1	112	S	1	LOW-CON	F	1004	0	0	0	10/5/2021 12:23	0	0			S 0H	6.6	7.38	7.95	13.3	6.6	99.8	98.7	0.9	0.2	0.2		4.7	135	1.32	93	10.5	1		14.8	2.93	10.1	32.3	100.4	6.2	10.9	14.5	8.5	1.31	35.2	73.7	83	32.4	7510	10.8
A2	117	A	2	LOW-IAIP	m	1210	1	1	0	17-05-2021 12:29	0	0			0H A	6.2	7.407	7.05	3.99	6.2	72.1	70.9	1.1	27.5	0.5		4.9	140	1.3	99	10.1	1.7		10	2.77	8.6	30.7	100.1	7.5	12.5	13.8	7.4	1.3	33.3	70.1	78.2	30.9	7498	11.75
B2	123	B	2	LOW-IAIP	f	1015	1	1	0	17-05-2021 12:39	0	0			0H B	6.7	7.456	6.23	5.86	6.7	91.2	90.1	1.2	8.7	0		3.7	148	1.23	102	1.1	2.5		13.7	2.39	9.1	31.7	100.1	12.5	16.2	14.9	8	1.27	32.9	68	77	33.2	7507	12.67
D2	136	D	2	LOW-PLACEBO	f	1041	0	1	0	17-05-2021 12:20	0	0			0H D	4.6	7.249	7.88	5.8	4.6	86.2	82.8	2.9	13.3	1		6.1	130	1.28	94	27	2.6		8.7	2.91	-1.4	23	100.1	10.4	16.5	9.9	-1.5	1.18	25.8	57.6	62	22.7	7372	10.81
E2	133	E	2	LOW-PLACEBO	f	1260.6	0	1	0	17-05-2021 12:12	0	0			0H E	7.4	7.48	6.37	4.32	7.4	74.9	74.1	0.9	24.8	0.2		4.5	144	1.07	100	3.9	1.7		12.4	2.85	12	33.8	100.1	8.5	13	16.4	10.6	1.12	35.5	72.5	82.9	36.5	7538	12.51
F2	119	F	2	HIGH-SE	m	1189	0	1	1	17-05-2021 12:34	0	0			0H F	7.7	7.415	6.89	3.08	7.7	53.4	52.8	0.8	46.1	0.3		4.3	137	1.24	95	8.699999999999999	2.5		9.2	2.92	8.5	29.9	100.1	8.5	12.7	17.2	7.2	1.25	33.1	68.1	77.7	38.3	7496	11.93
G2	135	G	2	HIGH-CON	f	1387	0	0	1	17-05-2021 12:16	0	0			0H G	6.8	7.39	7.26	4.27	6.8	73.2	72.1	1.2	26.4	0.3		3.6	139	1.43	99	11.8	2.6		11	2.91	8	30.1	100.1	7.5	11	14.9	6.7	1.43	33	69	77.6	33.4	7489	11.51
H2	999	H	2	HIGH-SE	m	1243	0	1	1	17-05-2021 12:28	0	0			0H H	4.9	7.39	6.06	6.87	4.9	96.8	92.9	3.2	3.1	0.8		3.9	140	1.25	99	24.7	6.2		10.3	1.7	2.6	26.4	100.1	14	18	10.5	2.3	1.25	27.5	59.4	64.8	24	7432	12.86
I2	132	I	2	HIGH-CON	m	1015.2	0	0	1	17-05-2021 12:10	0	0			0H I	6.3	7.373	7.22	5.21	6.3	83.9	82.6	1.2	15.9	0.3		3.6	139	1.34	97	16.5	3.4		11.8	2.8	6.3	28.9	100.1	9.9	13.5	13.9	5.2	1.32	31.5	66.6	74.3	31.1	7470	11.55
J2	128	J	2	LOW-IAIP	f	678	1	1	0	17-05-2021 11:47	0	0			0H J	5.9	7.171	7.56	8.23	5.9	94.4	92.8	1.4	5.5	0.3		6.4	136	0.98	99	34	1.6		12.4	2.89	-7.8	18.1	100.1	16.7	23.1	12.9	-7.8	0.87	20.7	45.9	50.3	28.9	7268	11.17
K2	141	K	2	LOW-PLACEBO	m	1405	0	1	0	17-05-2021 12:43	0	0			0H K	5.7	7.385	7.44	7.63	5.7	95.5	94	1.3	4.4	0.3		4.5	142	1.19	97	4	2.3		12.2	2.36	8.3	30.9	100.1	12.2	16.7	12.6	7.2	1.18	33.3	70.8	78.5	28.3	7495	11.31
L2	131	L	2	LOW-CON	m	1202.8	0	0	0	17-05-2021 12:11	0	0			0H L	7.3	7.478	6.22	4.48	7.3	81.9	81	0.8	17.9	0.3		3.9	141	1.23	98	2.3	2.7		13.4	2.51	11	33.1	100.1	8.5	12.4	16.2	9.7	1.28	34.5	70.4	80.6	36.1	7528	12.67
M2	140	M	2	LOW-IAIP	m	1261	1	1	0	17-05-2021 12:42	0	0			0H M	6.9	7.41	7.09	3.99	6.9	68.3	67.4	1	31.3	0.3		4.3	170	0.69	122	3.7	1.5		10.6	2.97	9.1	30.9	100.1	14.5	18.8	15.3	7.7	0.69	33.7	70.2	79.2	34.2	7502	11.7
N2	115	N	2	HIGH-SE	m	791	0	1	1	17-05-2021 12:41	0	0			0H N	6.6	7.391	7.44	5.96	6.6	90.3	89.1	1.2	9.6	0.1		3.9	143	1.33	99	5.2	2.3		13.4	2.56	8.9	31.1	100.1	10.5	14.4	14.7	7.5	1.33	33.8	70.6	79.6	32.8	7499	11.3
O2	134	O	2	LOW-CON	m	1031	0	0	0	17-05-2021 12:14	0	0			0H O	5.8	7.436	6.44	3.19	5.8	54.8	54	1	44.5	0.5		3.7	187	0.47	127	3.2	1.6		7.1	2.96	8.3	30.4	100.1	27.1	30.7	12.9	7.4	0.48	32.5	69	76.2	28.9	7499	12.43
P2	129	P	2	LOW-IAIP	f	1098.7	1	1	0	17-05-2021 12:31	0	0			0H P	7	7.424	7.32	3.11	7	54.7	54.1	0.7	44.8	0.4		3.8	138	1.28	96	2.7	1.6		8.6	2.89	11.5	32.7	100.1	6.9	10.7	15.6	9.8	1.29	35.9	74.8	84.2	34.7	7528	11.44
Q2	124	Q	2	HIGH-SE	f	793.5	0	1	1	17-05-2021 12:21	0	0			0H Q	5.6	7.13	9.58	4.94	5.6	78.4	77.1	1.2	21.2	0.5		6.1	119	1.13	79	129	1.5		9.7	3.05	-5.3	19.5	100.1	16.3	22.3	12.3	-5.7	0.97	23.9	53.8	58.4	27.5	7299	8.890000000000001
R2	118	R	2	HIGH-SE	f	1303	0	1	1	17-05-2021 12:08	0	0			0H R	6.3	7.379	6.59	4.82	6.3	78.6	77.5	1.1	21.1	0.3		4.4	162	0.81	115	27	3.4		11.1	2.95	4	27	100.1	17.8	22.2	14	3.3	0.8	29.1	61.5	68.7	31.2	7445	12.26
S2	125	S	2	LOW-IAIP	m	1327	1	1	0	17-05-2021 12:17	0	0			0H S	6.7	7.377	7.31	4.8	6.7	80.9	80	0.9	18.9	0.2		5.8	126	1.36	90	16	1.2		12.2	2.78	7.1	29.4	100.1	4.4	10.2	14.9	5.9	1.34	32.2	67.5	76	33.2	7478	11.45
T2	138	T	2	HIGH-CON	m	1193	0	0	1	17-05-2021 12:24	0	0			0H T	5.3	7.242	7.74	8.9	5.3	96.8	95.2	1.2	3.1	0.5		6.1	122	1.25	88	97	2.1		11.5	2.41	-2.3	22.2	100.1	9.9	16	11.7	-2.6	1.15	25	55	60	26.2	7356	10.96
U2	121	U	2	LOW-PLACEBO	m	741.5	0	1	0	17-05-2021 12:26	0	0			0H U	6.2	7.418	6.46	3.72	6.2	65.6	64.6	1	33.9	0.5		4.2	177	0.65	122	5.5	1.8		9	2.9	6.7	29.2	100.1	23.5	27.7	13.6	5.9	0.65	31.3	66	73.4	30.4	7480	12.41
V2	127	V	2	LOW-PLACEBO	m	1281	0	1	0	17-05-2021 12:32	0	0			0H V	5.5	7.435	6.51	3.62	5.5	69.1	67.9	1.3	30.3	0.5		4.5	136	1.26	95	7.2	3		8.5	2.65	8.5	30.9	100.1	8.2	12.7	12.1	7.5	1.28	32.7	69.7	76.7	27.2	7501	12.36
X2	139	X	2	LOW-PLACEBO	m	1111	0	1	0	17-05-2021 12:40	0	0			0H X	6.3	7.432	7.02	5.74	6.3	90.8	89.7	1.2	9.1	0		4.1	155	1	106	1.2	2.2		12.9	2.38	10.8	33.1	100.1	14.7	18.8	14	9.4	1.02	35.1	73.2	82.3	31.3	7523	11.78
Y2	122	Y	2	HIGH-SE	m	1340.4	0	1	1	17-05-2021 12:13	0	0			0H Y	6	7.461	5.81	5.84	6	92.2	91	1.1	7.7	0.2		4	226	0.57	161	12.4	1.8		12.4	2.24	7.2	30.3	100.1	34.1	38.1	13.3	6.5	0.59	31	64.9	72.6	29.6	7489	13.14
Z2	116	Z	2	LOW-IAIP	f	1270	1	1	0	17-05-2021 12:25	0	0			0H Z	6.1	7.361	6.69	12	6.1	98.8	97.9	0.6	1.2	0.3		4.8	137	1.19	97	16.8	4.2		13.6	2.95	3	26.5	100.1	11.1	15.9	13.4	2.4	1.16	28.4	60.2	67.1	29.9	7432	12.15
Ø2	137	Ø	2	LOW-CON	f	1275	0	0	0	17-05-2021 12:22	0	0			0H OE	5.6	7.31	7.22	13.7	5.6	100.3	99.2	0.9	-0.3	0.2		5.5	132	1.25	96	21.5	3.2		12.6	3.18	1	24.9	100.1	8.2	13.7	12.3	0.5	1.19	27.2	58.8	64.7	27.5	7404	11.55
Å2	130	Å	2	LOW-PLACEBO	m	902	0	1	0	17-05-2021 12:07	0	0			0H AA	8.1	7.231	9.99	2.84	8.1	39.8	39.3	0.7	59.4	0.6		5.1	132	1.26	93	7.8	2		7.2	3.34	3.9	24.7	100.1	7.8	12.9	17.8	1.8	1.15	31.4	67.1	75.6	39.8	7415	8.42
A3	150	A	3	HIGH-SE	f	725	0	1	1	25-05-2021 13:00	0	0			A 0H	5.7	7.289	6.58	41.2	5.7	101.4	100.5	0.8	-1.4	0.1		6.1	125	1.36	90	88	4.7		13.7	3.17	-3	21.9	100.7	11.8	17.9	12.8	-3	1.28	23.6	51.1	56.4	28.4	7351	12.4
ALPHA3	149	ALPHA	3	LOW-IAIP	m	847	1	1	0	25-05-2021 13:11	0	0			ALPHA 0H	5.8	7.383	7.51	6.72	5.8	93.3	91.9	1.4	6.6	0.1		4.6	143	1.1	99	4.2	1.9		12.1	2.46	8.4	31	100.7	11.1	15.7	12.8	7.2	1.09	33.5	71.1	78.9	28.7	7495	11.35
B3	143	B	3	HIGH-SE	f	794	0	1	1	25-05-2021 12:47	0	0			B 0H	5.2	7.347	7.34	5.51	5.2	86.9	85.4	1.5	12.9	0.2		5.2	130	1.32	89	58	2.1		10.1	2.69	4.5	27.6	100.7	11	16.2	11.5	3.8	1.28	30.1	65.2	71.3	25.8	7450	11.55
BETA3	153	BETA	3	LOW-IAIP	m	777	1	1	0	25-05-2021 12:03	0	0			0H BETA	5.2	7.475	5.01	19.5	5.2	100.9	99.3	1.1	-0.9	0.5		5.4	145	0.99	100	2.3	5.7		11.8	2.58	4.1	27.9	100.7	17.3	22.7	11.4	3.8	1.03	27.7	58.6	64.6	25.5	7455	14.17
D3	145	D	3	HIGH-SE	m	949.7	0	1	1	25-05-2021 12:11	0	0			0H D	5.2	7.408	6.95	5.63	5.2	89.9	88.5	1.4	9.9	0.2		4.9	143	1.1	96	22.2	1.5		10.5	2.43	8.2	30.9	100.7	13.8	18.7	11.5	7.3	1.1	32.9	70.3	77.2	25.8	7497	11.98
G3	164	G	3	LOW-CON	f	993	0	0	0	25-05-2021 12:50	0	0			G 0H	5.7	7.386	7.4	19.6	5.7	100.9	100	1	-0.9	-0.1		4.7	146	1.14	101	8.300000000000001	1.7		13.2	2.89	8.3	31	100.7	11.9	16.6	12.7	7.1	1.14	33.3	70.6	78.4	28.2	7494	11.47
GAMMA3	148	GAMMA	3	HIGH-SE	m	1159	0	1	1	25-05-2021 13:08	0	0			GAMMA 0H	5.7	7.397	7.43	6.87	5.7	93.9	92.7	1.3	6	0		4.3	136	1.36	94	17.3	1.4		12.1	2.42	9.4	31.9	100.7	8.3	12.6	12.7	8.2	1.35	34.2	72.6	80.5	28.3	7507	11.44
H3	146	H	3	HIGH-SE	f	1104	0	1	1	25-05-2021 13:16	0	0			H 0H	6.1	7.485	5.74	7.12	6.1	95.4	94.4	1.1	4.6	-0.1		5	137	1.3	95	13.7	1.6		13.1	2.19	9	31.9	100.7	9.4	14.3	13.6	8.1	1.36	32.4	67.3	75.6	30.3	7509	13.35
I3	152	I	3	LOW-IAIP	f	996	1	1	0	25-05-2021 12:55	0	0			I 0H	5.6	7.405	5.91	8.89	5.6	98.4	97.1	1.3	1.6	0		5.8	148	1.25	102	9.4	4.4		12.4	2.8	3	26.8	100.7	18.8	24.5	12.4	2.7	1.25	27.8	58.9	65.3	27.7	7438	13.16
J3	155	J	3	HIGH-SE	m	885	0	1	1	25-05-2021 12:41	0	0			0H J	5.2	7.375	5.76	6.55	5.2	93.8	92.5	1.3	6.1	0.1		5.4	128	1.31	90	51	4.1		10.9	2.3	0	24.3	100.7	12.4	17.8	11.5	-0.1	1.29	25.2	54.3	59.5	25.7	7399	13.33
K3	161	K	3	HIGH-CON	f	984	0	0	1	25-05-2021 12:20	0	0			0H K	6.4	7.484	5.7	25.4	6.4	100.7	100.2	0.7	-0.7	-0.2		4.5	139	1.23	96	6.3	2		14.7	2.52	8.7	31.7	100.7	10.1	14.6	14.1	7.9	1.29	32.1	66.3	74.9	31.4	7506	13.4
L3	151	L	3	LOW-IAIP	m	1175	1	1	0	25-05-2021 12:43	0	0			L 0H	3.9	7.439	6.44	7.15	3.9	99.8	95.7	3.5	0.2	0.6		5.2	159	0.99	105	3.9	2.1		8.5	3.31	8.6	31.7	100.7	20.7	25.9	8.3	7.9	1.02	32.7	71.5	76.7	19.1	7505	12.56
N3	159	N	3	LOW-PLACEBO	m	1219	0	1	0	25-05-2021 13:14	0	0			N 0H	4.8	7.496	5.3	45.6	4.8	106.2	102	3.2	-6	0.8		5.2	139	1.34	98	6.3	4.4				7.5		100.7	10.8	16	10.4	6.9	1.41	30.7		71.6	23.8	7494	13.84
O3	157	O	3	LOW-PLACEBO	f	849	0	1	0	25-05-2021 12:28	0	0			O 0H	5.8	7.455	6.35	5.69	5.8	89.3	88.2	1.3	10.6	-0.1		4.8	146	1.11	101	7.5	1.5		11.7	2.54	9.6	32.2	100.7	11.5	16.3	12.9	8.6	1.15	33.5	70.4	78.4	28.8	7514	12.66
P3		P	3	LOW-CON	m	1279	0	0	0	25-05-2021 13:02	0	0			P 0H	4.5	7.368	6.79	9.21	4.5	102.7	98.6	3.4	-2.6	0.6		5.5	140	1.3	96	15	2.1				4		100.7	14.2	19.7	9.6	3.5	1.28	29.3		69.1	22.1	7448	12.16
Q3	165	Q	3	HIGH-CON	m	676	0	0	1	25-05-2021 12:52	0	0			Q 0H	4.2	7.244	8.74	6.19	4.2	95	91.2	3.3	4.8	0.7		6.1	123	1.23	87	133	1.7		8.7	1.9	1	25.1	100.7	8	14	9	0.8	1.13	28.4	63.5	68.1	20.7	7405	9.960000000000001
R3	160	R	3	LOW-CON	m	637	0	0	0	25-05-2021 12:12	0	0			0H R	5.4	7.487	5.61	37.6	5.4	101.2	100.2	0.8	-1.2	0.2		4.9	136	1.35	95	3	1.6		12.9	2.57	8.5	31.6	100.7	8.5	13.4	12	7.8	1.42	31.9	67.1	74.3	26.7	7505	13.49
T3	144	T	3	LOW-PLACEBO	m	1017	0	1	0	25-05-2021 12:57	0	0			T 0H	5.2	7.402	6.73	38.6	5.2	101.3	100.3	0.9	-1.3	0.1		4.5	146	1.03	97	14.2	1.5		12.4	2.83	6.6	29.7	100.7	17.2	21.7	11.5	5.8	1.03	31.4	67.1	73.7	25.5	7479	12.23
U3	142	U	3	LOW-PLACEBO	f	909	0	1	0	25-05-2021 12:07	0	0			0H U	4.9	7.453	5.87	4.82	4.9	86.4	83.1	3.2	13.1	0.6		4.4	148	0.91	104	3	3.1		9.3	2.34	6.8	29.9	100.7	14	18.4	10.6	6.2	0.93	30.8	65.8	71.9	24.2	7485	13.2
V3	158	V	3	LOW-PLACEBO	f	795	0	1	0	25-05-2021 13:06	0	0			V 0H	5.3	7.479	4.85	31.6	5.3	101.3	100.2	0.8	-1.3	0.3		5.1	151	1.04	103	4.7	6.9		12.4	2.6	3.5	27.4	100.7	21.7	26.7	11.7	3.3	1.08	27	57	63	26	7448	14.36
X3	162	X	3	LOW-CON	f	828	0	0	0	25-05-2021 12:33	0	0			X 0H	4.1	7.05	6.57	8.87	4.1	97.5	93.4	3.3	2.4	0.9		5.3	134	1.23	94	30	12.4		8.9	4.86	-16.8	12.2	100.7	26.4	31.7	8.9	-15.6	1.01	13.6	32	33.9	20.4	7106	12.41
Y3	156	Y	3	LOW-PLACEBO	f	702	0	1	0	25-05-2021 12:45	0	0			Y 0H	6.6	7.509	5.5	10.6	6.6	99.4	98.5	1	0.6	-0.1		4.8	134	1.26	92	6.3	1.6		14.8	2.47	9.8	32.7	100.7	9.1	13.9	14.7	9	1.34	32.8	67.2	76.4	32.7	7519	13.62
Æ3	163	Æ	3	HIGH-CON	f	908	0	0	1	25-05-2021 12:40	0	0			AE 0H	5.6	7.441	6.22	19.4	5.6	100.8	99.9	0.8	-0.8	0.1		4.8	140	1.29	96	14.9	2		12.9	2.7	7.6	30.6	100.7	12.4	17.2	12.5	6.8	1.32	31.7	66.9	74.3	27.8	7492	12.81
Ø3	157	Ø	3	LOW-IAIP	f	826	1	1	0	25-05-2021 13:04	0	0			OE 0H	5.9	7.524	5.75	47.2	5.9	100.9	100.2	0.6	-0.9	0.1		4.9	137	1.39	94	4.9	2.1		14.3	2.42	12.7	35.4	100.7	7.5	12.5	13.2	11.6	1.48	35.5	73.6	82.5	29.4	7550	13.34
Å3		Å	3	LOW-IAIP	f	970	1	1	0	25-05-2021 12:23	0	0			0H AA	5.3	7.478	5.29	8.7	5.3	98.6	97.3	1.3	1.4	0		4.8	137	1.18	94	7.4	4.2		11.9	2.6	5.9	29.4	100.7	13.2	18.1	11.8	5.4	1.23	29.4	62.1	68.6	26.4	7476	13.85
B1		B	1	HIGH-SE	F	1222	0	1	1	10/5/2021 2:58	3	3			3H B	6	7.474	6.11	22.1	6	101	100.1	0.8	-1	0.1		3	150	1.28	101	16.5	2.4		13.9	2.62	10	32.8	100.5	15.7	18.7	13.4	9	1.33	33.6	69.9	78.4	29.8	7519	12.89
C1		C	1	LOW-PLACEBO	F	1065.9	0	1	0	10/5/2021 3:03	3	3			3H C	5.7	7.504	5.06	24.3	5.7	101	100.2	0.7	-1	0.1		3.7	162	0.98	109	3.1	1.7		13.2	2.53	6.8	30.2	100.5	23.2	26.9	12.7	6.3	1.04	29.9	62.4	69.6	28.1	7487	14.06
E1	108	E	1	LOW-PLACEBO	M	1174	0	1	0	10/5/2021 4:09	3	3			3H E	6.2	7.487	5.71	16.3	6.2	100.4	99.7	0.6	-0.4	0.1		5	140	1.44	98	10.4	1.8		14.1	2.59	9	32	100.5	9.8	14.8	13.7	8.2	1.51	32.4	67.1	75.5	30.5	7510	13.34
F1	105	F	1	HIGH-SE	F	1038.5	0	1	1	10/5/2021 3:26	3	3			3H F	5.2	7.453	6	6.62	5.2	94.9	93.7	1	5	0.3		3.2	149	1.26	105	16.2	2.9		11.1	2.11	7.5	30.6	100.5	12.9	16.1	11.6	6.8	1.3	31.5	66.8	73.6	25.9	7492	13.01
G1	106	G	1	LOW-PLACEBO	F	932.1	0	1	0	10/5/2021 3:53	3	3			3H G	6.3	7.482	6.05	20.7	6.3	100.4	99.5	0.6	-0.4	0.3		4	143	1.31	97	4.2	1.7		14.4	2.55	10.5	33.2	100.5	12.3	16.2	13.9	9.4	1.37	34	70.3	79.2	31	7525	12.95
H1	111	H	1	HIGH-CON	M	1165	0	0	1	10/5/2021 3:20	3	3			3H H	5.7	7.455	6.02	9.98	5.7	99.3	98.2	0.8	0.7	0.3		3.3	158	1.29	111	16.6	2		12.9	2.7	7.8	30.9	100.5	15.1	18.5	12.7	7.1	1.33	31.7	66.7	74.2	28.3	7495	12.99
I1	107	I	1	HIGH-SE	M	1075	0	1	1	10/5/2021 3:46	3	3			3H I	6.5	7.57	4.23	9.9	6.5	99.2	98.2	0.7	0.8	0.3		3.6	163	0.91	117	22.2	2.6		14.5	2.32	7	30.7	100.5	16.7	20.4	14.3	6.9	1	29	59.2	67.3	31.9	7495	15.01
J1		J	1	LOW-IAIP	M	1324.5	1	1	0	10/5/2021 3:19	3	3			3H J	4.5	7.455	6.05	8.57	4.5	101.4	96.9	3.5	-1.3	0.9		3.9	154	0.92	109	3.7	3.3		9.8	3.24	7.9	31.1	100.5	13.6	17.5	9.6	7.2	0.95	31.9	68.6	74.5	22	7498	12.95
K1		K	1	LOW-CON	M	1206.8	0	0	0	10/5/2021 3:06	3	3			3H K	5.5	7.432	6.82	13.2	5.5	100.3	99.1	0.9	-0.3	0.3		4.6	141	1.4	99	3.6	1.3		12.6	2.79	9.8	32.5	100.5	8.5	13.1	12.3	8.7	1.43	34.1	72.2	80	27.4	7515	12.08
L1	113	L	1	HIGH-CON	F	1129	0	0	1	10/5/2021 3:36	3	3			3H L	6.1	7.393	7.28	7.1	6.1	92.8	91.8	0.9	7.1	0.2		3.8	138	1.43	97	18.4	1.6		12.7	2.73	8.3	30.9	100.5	7.4	11.2	13.5	7.1	1.42	33.2	70.1	78.2	30.1	7495	11.57
M1	114	M	1	LOW-IAIP	F	1191	1	1	0	10/5/2021 3:42	3	3			3H M	6	7.428	6.62	15.7	6	100.6	99.5	0.9	-0.6	0.2		4.2	151	1.03	101	2.9	1.5		13.7	2.76	8.4	31.2	100.5	16.7	20.9	13.3	7.4	1.05	32.7	68.7	76.8	29.7	7499	12.32
N1		N	1	HIGH-SE	M	1468	0	1	1	10/5/2021 4:04	3	3			3H N	4.6	7.371	7.54	39.3	4.6	105.8	102.1	2.8	-5.6	0.7		2.9	160	1.2	114	17.7	1.6				7.5		100.5	13.8	16.7	9.9	6.7	1.18	32.8		77.3	22.7	7489	11.27
O1		O	1	LOW-PLACEBO	M	1314.8	0	1	0	10/5/2021 4:17	3	3			3H O	6.2	7.591	5.15	38	6.2	101.1	100.6	0.5	-1.1	0		4	158	1.25	107	3.2	2.1		14.7	2.31	15.4	38.1	100.5	14.5	18.5	13.8	14.2	1.39	37.1	75.9	85.8	30.7	7579	13.97
P1		P	1	LOW-IAIP	M	981	1	1	0	10/5/2021 3:58	3	3			3H P	6.4	7.271	9.25	3.78	6.4	59.4	58.3	1.4	39.8	0.5		4.2	140	1.26	97	6	3.4		8.5	3.26	5	27	100.5	10.9	15.1	14.1	3.6	1.17	31.9	69	76.3	31.8	7444	9.35
R1	104	R	1	LOW-IAIP	F	988.2	1	1	0	10/5/2021 4:12	3	3			3H R	3.7	7.621	4.23	33.3	3.7	106	102.1	3	-5.8	0.7		4.8	141	1.2	99	2.4	1.8				11.4		100.5	9.5	14.3	8.1	10.5	1.36	32.7		75.4	18.5	7539	15.01
S1	112	S	1	LOW-CON	F	1004	0	0	0	10/5/2021 3:32	3	3			3H S	6.8	7.509	5.95	30.5	6.8	100.7	100	0.4	-0.7	0.3		4.2	162	0.99	112	3.1	1.3		15.7	2.5	12.4	35	100.5	14.4	18.6	15	11.2	1.05	35.5	72.5	82.6	33.4	7545	13.06
A2	117	A	2	LOW-IAIP	m	1210	1	1	0	17-05-2021 16:30	3	3			3H A	5.8	7.448	6.37	8.32	5.8	96	94.8	1	4	0.2		4.8	147	1.35	107	2.7	3		12.5	2.49	9	31.8	100.2	7.6	12.4	12.8	8	1.39	33	69.4	77.3	28.6	7507	12.53
B2	123	B	2	LOW-IAIP	f	1015	1	1	0	17-05-2021 16:49	3	3			3H B	6.6	7.521	5.39	5.44	6.6	90.2	89.1	1.2	9.7	0		4.5	154	1.05	107	2.3	1.7		13.3	2.31	10.2	33	100.2	13.4	17.9	14.6	9.4	1.12	33.1	67.8	76.9	32.5	7525	13.63
D2	136	D	2	LOW-PLACEBO	f	1041	0	1	0	17-05-2021 15:52	3	3			3H D	4	7.549	4.92	32	4	106	101.9	3	-5.8	0.9		4.8	140	1.3	98	4.5	1.4				9.8		100.1	9.2	14	8.6	9	1.41	32.2		74.7	19.7	7521	14.16
E2	133	E	2	LOW-PLACEBO	f	1260.6	0	1	0	17-05-2021 15:27	3	3			3H E	7.3	7.562	5.04	23.4	7.3	100.9	100.3	0.5	-0.9	0.1		4.8	140	1.35	99	2.5	1.2		16.8	2.36	11.8	34.8	100.1	6.8	11.6	16.3	11	1.47	34	68.2	78.8	36.1	7544	14.02
F2	119	F	2	HIGH-SE	m	1189	0	1	1	17-05-2021 16:41	3	3			3H F	5.9	7.442	5.97	7.82	5.9	96	95.2	0.8	4	0		4.2	146	1.27	104	21.6	3.8		12.8	2.3	6.4	29.6	100.2	11.3	15.6	13.1	5.7	1.3	30.5	64	71.4	29.2	7479	12.98
G2	135	G	2	HIGH-CON	f	1387	0	0	1	17-05-2021 15:41	3	3			3H G	6.7	7.494	5.44	21.5	6.7	100.8	100.2	0.5	-0.8	0.1		3.6	151	1.2	111	17.6	2.2		15.4	2.55	8.1	31.2	100.1	8.7	12.3	14.9	7.4	1.27	31.3	64.2	73.1	33.1	7500	13.57
I2	132	I	2	HIGH-CON	m	1015.2	0	0	1	17-05-2021 15:17	3	3			3H I	6	7.432	6.3	6.39	6	93.3	92.1	1.2	6.6	0.1		3.5	152	1.24	109	16.8	2.1		12.6	2.32	7.2	30.1	100.1	11.4	14.9	13.3	6.4	1.27	31.5	66	73.8	29.7	7486	12.6
J2	128	J	2	LOW-IAIP	f	678	1	1	0	17-05-2021 14:59	3	3			3H J	6.5	7.434	5.2	41.1	6.5	101.3	100.6	0.6	-1.3	0.1		4.2	145	1.38	107	2.5	3.2		15.5	2.72	1.9	26	100.1	11.5	15.7	14.5	1.8	1.41	26.1	54.1	61.2	32.2	7426	13.84
K2	141	K	2	LOW-PLACEBO	m	1405	0	1	0	17-05-2021 17:11	3	3			3H K	6.1	7.558	4.59	18.5	6.1	100.7	99.8	0.8	-0.7	0.1		4.5	165	1.04	110	2.8	2.4		14	2.36	8.5	31.9	100.2	24.4	28.9	13.6	8.1	1.13	30.7	63.1	71.2	30.3	7509	14.54
L2	131	L	2	LOW-CON	m	1202.8	0	0	0	17-05-2021 15:12	3	3			3H L	6.7	7.617	3.62	19.3	6.7	100.8	100.2	0.5	-0.8	0.1		5	165	0.76	110	10.6	2.3		15.5	2.23	6.5	30.6	100.1	27.8	32.9	15	6.8	0.86	27.7	56	64	33.3	7493	15.62
M2	140	M	2	LOW-IAIP	m	1261	1	1	0	17-05-2021 17:07	3	3			3H M	6.4	7.428	6.65	6.17	6.4	89	87.8	1.1	10.9	0.2		4.4	150	1.11	99	2.9	1.3		12.8	2.83	8.6	31.1	100.2	18.1	22.5	14.2	7.5	1.13	32.9	68.6	77.2	31.7	7500	12.22
N2	115	N	2	HIGH-SE	m	791	0	1	1	17-05-2021 17:02	3	3			3H N	6.1	7.416	6.83	8.98	6.1	98.2	97.2	0.9	1.8	0.1		3.3	156	1.21	111	13.9	2.4		13.6	2.79	8.4	31.1	100.2	12.1	15.4	13.6	7.3	1.22	32.9	69	77.3	30.4	7497	12.01
O2	134	O	2	LOW-CON	m	1031	0	0	0	17-05-2021 15:36	3	3			3H O	5.9	7.589	4.5	16.3	5.9	100.7	99.8	0.7	-0.7	0.2		4.4	155	1.05	105	2.5	1.5		13.5	2.3	10.5	33.8	100.1	17.5	22	13.1	10	1.16	32.3	66.5	74.7	29.1	7532	14.63
P2	129	P	2	LOW-IAIP	f	1098.7	1	1	0	17-05-2021 16:32	3	3			3H P	6.3	7.546	5.14	7.35	6.3	92	91.2	0.9	7.9	0		4.4	162	0.76	111	2.9	2.4		13.1	2.99	11	33.8	100.2	17.5	21.9	14	10.1	0.82	33.4	68.6	77.5	31.2	7534	13.91
Q2	124	Q	2	HIGH-SE	f	793.5	0	1	1	17-05-2021 15:57	3	3			3H Q	5.4	7.511	5.1	10	5.4	99.8	98.4	1	0.2	0.4		3.2	148	1.1	102	8.5	2.3		12.2	2.55	7.6	30.9	100.1	15.1	18.3	12	7	1.17	30.6	64.1	71.1	26.7	7496	13.96
R2	118	R	2	HIGH-SE	f	1303	0	1	1	17-05-2021 15:07	3	3			3H R	6.3	7.534	5	8.12	6.3	98.1	97.3	0.9	1.9	-0.1		3.2	142	1.43	102	11.3	2.2		13.8	2.45	8.9	32.1	100.1	8.7	11.9	13.9	8.3	1.54	31.6	64.9	73.3	30.9	7512	14.07
S2	125	S	2	LOW-IAIP	m	1327	1	1	0	17-05-2021 15:47	3	3			3H S	6.1	7.411	6.99	9.99	6.1	98.9	97.8	0.9	1.1	0.2		4.4	140	1.41	99	3.2	0.8		13.6	2.88	8.6	31.3	100.1	7.5	12	13.6	7.5	1.42	33.3	69.8	78.1	30.2	7500	11.83
T2	138	T	2	HIGH-CON	m	1193	0	0	1	17-05-2021 16:09	3	3			3H T	5.9	7.453	5.7	22.6	5.9	100.9	100	0.7	-0.9	0.2		3.7	165	0.66	117	20.5	1.4		13.5	2.66	5.9	29.3	100.2	18.2	21.9	13	5.4	0.68	29.9	62.6	69.9	28.9	7475	13.28
U2	121	U	2	LOW-PLACEBO	m	741.5	0	1	0	17-05-2021 16:18	3	3			3H U	5.5	7.52	5.29	21.9	5.5	100.8	99.8	0.6	-0.8	0.4		4.7	138	1.39	98	2	1.5		12.7	2.47	9.5	32.6	100.2	7.2	11.9	12.2	8.8	1.49	32.4	67.8	75.3	27.1	7518	13.74
V2	127	V	2	LOW-PLACEBO	m	1281	0	1	0	17-05-2021 16:36	3	3			3H V	4.7	7.503	5.62	5.25	4.7	92.3	88.8	3.1	7.4	0.7		4.9	138	1.2	93	4	2.3		9.4	1.94	9.9	32.7	100.2	11.3	16.2	10.1	9.1	1.27	33	70.5	76.9	23.1	7521	13.38
X2	139	X	2	LOW-PLACEBO	m	1111	0	1	0	17-05-2021 16:57	3	3			3H X	5.2	7.535	4.99	17.4	5.2	101	99.8	0.8	-1	0.4		4.3	148	1.09	103	3.5	3.2		11.8	2.47	9	32.2	100.2	13.2	17.5	11.4	8.3	1.17	31.6	66.4	73.4	25.5	7513	14.09
Y2	122	Y	2	HIGH-SE	m	1340.4	0	1	1	17-05-2021 15:31	3	3			3H Y	6.1	7.6	4.25	32.4	6.1	101.2	100.5	0.6	-1.2	0.1		3.7	142	1.42	104	11.4	2		14.3	2.26	9.7	33.1	100.1	7.1	10.8	13.6	9.3	1.58	31.3	64	72.3	30.2	7525	14.92
Z2	116	Z	2	LOW-IAIP	f	1270	1	1	0	17-05-2021 16:12	3	3			3H Z	5.6	7.507	4.86	24.7	5.6	101.1	100.1	0.7	-1.1	0.3		4.1	200	0.68	135	3.6	3.1		13.1	2.55	5.8	29.4	100.1	36.7	40.8	12.5	5.5	0.73	28.9	60.3	67.2	27.8	7477	14.22
Æ2	120	Æ	2	LOW-IAIP	m	1180.8	1	1	0	17-05-2021 15:23	3	3			3H AE	6.2	7.493	5.54	6.27	6.2	94.7	93.8	1	5.2	0		4.5	161	0.9	108	2.6	1		13.2	2.01	8.6	31.5	100.1	21.6	26.1	13.8	7.8	0.95	31.9	66	74.2	30.7	7506	13.45
Ø2	137	Ø	2	LOW-CON	f	1275	0	0	0	17-05-2021 16:03	3	3			3H OE	6.9	7.517	5.16	28.1	6.9	100.8	99.9	0.6	-0.8	0.3		4.6	149	1.27	105	3	2		16.1	2.45	8.5	31.7	100.1	12.6	17.2	15.4	7.9	1.35	31.4	63.8	73	34.3	7507	13.89
Å2	130	Å	2	LOW-PLACEBO	m	902	0	1	0	17-05-2021 15:02	3	3			3H AA	7.7	7.357	7.89	3.68	7.7	62.1	61.5	0.7	37.6	0.2		4.8	167	0.84	108	3.4	2.1		10.7	3.04	7.6	29	100.1	25.6	30.4	17.1	6	0.82	33.1	68.8	78.3	38.1	7478	10.8
A3	150	A	3	HIGH-SE	f	725	0	1	1	25-05-2021 16:23	3	3			3H A	5.8	7.453	5.47	27.6	5.8	101	100.2	0.8	-1	0		3.4	153	1.03	110	26	2.1		13.4	2.64	4.7	28.4	100.7	14.6	18	12.8	4.3	1.06	28.7	60.2	67.1	28.4	7461	13.65
ALPHA3	149	ALPHA	3	LOW-IAIP	m	847	1	1	0	25-05-2021 16:46	3	3			3H ALPHA	5.3	7.505	4.85	32.6	5.3	101.2	100.3	0.8	-1.2	0.1		4.3	149	1.04	108	3.9	3		12.6	2.5	5.6	29.2	100.7	12.9	17.2	11.8	5.3	1.1	28.7	60.3	66.8	26.3	7474	14.36
B3	143	B	3	HIGH-SE	f	794	0	1	1	25-05-2021 15:57	3	3			3H B	5.4	7.492	5.04	6.03	5.4	93.2	92	1.2	6.7	0.1		3.5	145	1.24	102	18.6	2.2		11.4	2.18	5.7	29.1	100.7	13.8	17.3	12	5.3	1.31	29	61	67.5	26.9	7474	14.14
BETA3	153	BETA	3	LOW-IAIP	m	777	1	1	0	25-05-2021 15:00	3	3			3H BETA	5.5	7.531	5.31	16.9	5.5	100.6	99.7	0.8	-0.6	0.1		4.4	142	1.28	99	1.9	1.4		12.7	2.43	10.6	33.6	100.7	8.9	13.3	12.3	9.8	1.38	33.3	69.6	77.4	27.3	7529	13.84
D3	145	D	3	HIGH-SE	m	949.7	0	1	1	25-05-2021 15:07	3	3			3H D	5.4	7.415	6.76	6.9	5.4	94.2	92.9	1.2	5.7	0.2		4	135	1.34	95	23.3	2.1		11.3	2.37	7.9	30.7	100.7	7.7	11.7	11.8	7	1.35	32.4	69.1	76.2	26.5	7493	12.21
G3	164	G	3	LOW-CON	f	993	0	0	0	25-05-2021 16:02	3	3			3H G	5.5	7.506	5.39	30.5	5.5	101.3	100.3	0.9	-1.3	0.1		4.1	149	1.09	105	3.4	1.3		12.9	2.51	8.8	32	100.7	11.6	15.7	12.2	8.1	1.15	31.9	66.9	74.3	27.1	7510	13.75
GAMMA3	148	GAMMA	3	HIGH-SE	m	1159	0	1	1	25-05-2021 16:41	3	3			3H GAMMA	5.4	7.524	5.03	7.45	5.4	97.5	95.9	1.5	2.5	0.1		3.3	148	1.16	106	12.9	2		11.8	2.49	8.3	31.5	100.7	11.6	14.9	11.9	7.7	1.24	31	65.1	72.2	26.7	7504	14.15
H3	146	H	3	HIGH-SE	f	1104	0	1	1	25-05-2021 16:55	3	3			3H H	4.7	7.541	4.43	45.7	4.7	106.3	102.2	3.2	-6.1	0.7		3.2	145	1.27	103	20.2	2.1				5.9		100.7	13.7	17	10.2	5.6	1.37	28.5		66	23.4	7479	14.82
I3	152	I	3	LOW-IAIP	f	996	1	1	0	25-05-2021 16:19	3	3			3H I	5.8	7.629	3.91	31	5.8	101.2	100.4	0.8	-1.2	0		4.4	157	0.93	108	3.2	1.4		13.6	2.16	9.7	33.2	100.7	18.2	22.6	12.9	9.4	1.06	30.8	63.3	71	28.6	7525	15.41
J3	155	J	3	HIGH-SE	m	885	0	1	1	25-05-2021 15:31	3	3			3H J	5.1	7.533	4.44	37.6	5.1	101.5	100.3	0.9	-1.5	0.3		3.6	141	1.31	99	16	2.3		12.2	2.42	5.4	29.1	100.7	13.7	17.3	11.3	5.1	1.41	28	59	65.1	25.1	7473	14.82
K3	161	K	3	HIGH-CON	f	984	0	0	1	25-05-2021 15:17	3	3			3H K	5.3	7.633	3.48	26.5	5.3	101.2	100.4	0.8	-1.2	0		4.2	153	0.97	109	26	2.7		12.3	2.15	6.6	30.4	100.7	15.9	20.1	11.7	6.5	1.1	27.6	57.3	63.6	26.1	7491	15.91
L3	151	L	3	LOW-IAIP	m	1175	1	1	0	25-05-2021 15:46	3	3			3H L	4.1	7.598	4.1	22.4	4.1	106.1	101.6	3.5	-5.8	0.7		4.4	154	1	107	3.3	1.6				8.4		100.7	17	21.4	8.8	7.8	1.12	30		69.4	20.1	7507	15.2
N3	159	N	3	LOW-PLACEBO	m	1219	0	1	0	25-05-2021 16:50	3	3			3H N	5	7.599	4.58	33.4	5	106.1	102	3.2	-5.9	0.7		4.9	143	1.34	100	3.2	1.9				12		100.7	10.1	15.1	10.8	11.2	1.49	33.6		77.7	24.8	7546	14.65
O3	157	O	3	LOW-PLACEBO	f	849	0	1	0	25-05-2021 15:27	3	3			3H O	5.7	7.521	5.07	34.2	5.7	101.1	100.4	0.8	-1.1	-0.1		4.1	152	1.23	108	3	1.9		13.4	2.42	8.3	31.5	100.7	12.6	16.7	12.6	7.7	1.32	31.1	64.8	72.3	28	7504	14.11
P3		P	3	LOW-CON	m	1279	0	0	0	25-05-2021 16:27	3	3			3H P	4.2	7.509	5.23	12.2	4.2	104.9	100.9	3.3	-4.7	0.5		4.7	141	1.45	101	2.6	1.4				8.2		100.7	8.9	13.6	9	7.5	1.54	31.2		72.6	20.7	7502	13.92
Q3	165	Q	3	HIGH-CON	m	676	0	0	1	25-05-2021 16:07	3	3			3H Q	3.5	7.515	5.01	31.9	3.5	106	101.7	3.2	-5.8	0.9		3.7	144	1.26	101	20.1	2.3				7.4		100.7	12.9	16.6	7.5	6.7	1.34	30.3		70.5	17.3	7493	14.18
R3	160	R	3	LOW-CON	m	637	0	0	0	25-05-2021 15:12	3	3			3H R	5.1	7.499	4.98	25.2	5.1	101.3	100.2	0.9	-1.3	0.2		4.1	172	0.55	118	2.5	1.5		12	2.54	5.8	29.4	100.7	25	29.1	11.4	5.5	0.58	29	61.4	67.6	25.4	7477	14.21
T3	144	T	3	LOW-PLACEBO	m	1017	0	1	0	25-05-2021 16:20	3	3			3H T	5.1	7.512	5.55	33.6	5.1	101.7	100.4	1.1	-1.7	0.2		4.2	153	1.01	103	3.8	1.4		12	2.56	10.4	33.3	100.7	16.8	21	11.3	9.5	1.08	33.4	70.5	77.7	25.1	7526	13.56
U3	142	U	3	LOW-PLACEBO	f	909	0	1	0	25-05-2021 15:02	3	3			3H U	5.7	7.456	6.17	18.4	5.7	100.6	99.9	0.7	-0.6	0		5	146	1.15	102	4.3	1.6		13.2	2.66	8.7	31.6	100.7	11	16	12.7	7.8	1.19	32.6	68.4	76.2	28.3	7505	12.87
V3	158	V	3	LOW-PLACEBO	f	795	0	1	0	25-05-2021 16:36	3	3			3H V	5.4	7.561	4.86	47.7	5.4	101.3	100.4	0.6	-1.3	0.3		4.2	150	1.2	104	3	1.4		13.1	2.36	10.5	33.6	100.7	13	17.3	12	9.8	1.32	32.7	68.3	75.8	26.7	7530	14.34
X3	162	X	3	LOW-CON	f	828	0	0	0	25-05-2021 15:35	3	3			3H X	4.4	7.521	4.01	6.96	4.4	101.2	96.7	3.6	-1.1	0.8		4.9	140	1.06	97	10	6		9.6	2.96	1.8	26	100.7	18.3	23.2	9.4	1.8	1.13	24.6	52.6	57.2	21.8	7428	15.31
Y3	156	Y	3	LOW-PLACEBO	f	702	0	1	0	25-05-2021 15:51	3	3			3H Y	6.3	7.513	4.87	38.8	6.3	100.9	100.4	0.6	-0.9	-0.1		4.4	160	0.58	118	2.6	2.7		14.9	2.43	6.4	29.9	100.7	11.7	16.1	14	6	0.62	29.3	60.5	68.2	31	7484	14.34
Æ3	163	Æ	3	HIGH-CON	f	908	0	0	1	25-05-2021 15:41	3	3			3H AE	5.1	7.511	5.05	6.77	5.1	96.2	94.7	1.4	3.7	0.2		4	141	1.33	100	17.8	1.8		11.1	1.85	7.2	30.5	100.7	10.8	14.9	11.4	6.7	1.42	30.2	63.8	70.3	25.4	7492	14.14
Ø3	154	Ø	3	LOW-IAIP	f	826	1	1	0	25-05-2021 16:30	3	3			3H OE	5.9	7.518	5.56	47.1	5.9	101.3	100.5	0.7	-1.3	0.1		4.4	153	1.05	105	2.9	1.5		14.1	2.48	11	33.8	100.7	13.6	18.1	13	10.1	1.12	33.9	70.4	78.8	28.9	7532	13.55
Å3		Å	3	LOW-IAIP	f	970	1	1	0	25-05-2021 15:24	3	3			3H AA	4.9	7.564	4.64	27.9	4.9	106	101.8	3.2	-5.8	0.8		4.4	149	1.02	104	4.5	1.6				9.2		100.7	13.5	17.9	10.4	8.6	1.12	31.4		72.7	24	7516	14.6
B1		B	1	HIGH-SE	F	1222	0	1	1	10/5/2021 5:58	6	6			6H B	5.4	7.511	5.29	38.2	5.4	101.6	100.7	0.7	-1.6	0.2		2.9	165	0.99	114	11.8	1.5		13	2.56	8.7	31.9	100.6	19.1	22	12.1	8.1	1.05	31.7	66.6	73.8	26.8	7509	13.83
C1		C	1	LOW-PLACEBO	F	1065.9	0	1	0	10/5/2021 6:01	6	6			6H C	5.6	7.479	5.53	18.3	5.6	101.1	100.2	0.8	-1.1	0.1		3.9	147	1.32	103	2.2	1.4		12.8	2.65	7.3	30.6	100.6	12.7	16.6	12.4	6.7	1.38	30.8	64.7	71.9	27.6	7492	13.56
E1	108	E	1	LOW-PLACEBO	M	1174	0	1	0	10/5/2021 7:02	6	6			6H E	5.6	7.581	4.41	12.2	5.6	100.6	99.7	0.8	-0.6	0.1		4.1	182	0.9	113	4.2	2		12.8	2.36	9.2	32.5	100.7	38.8	42.9	12.5	8.7	0.99	31.1	64.4	71.9	27.7	7517	14.86
F1	105	F	1	HIGH-SE	F	1038.5	0	1	1	10/5/2021 6:23	6	6			6H F	5.1	7.518	4.91	23	5.1	101.6	100.7	0.7	-1.6	0.2		3.2	161	0.98	111	14.4	2		11.8	2.59	7	30.4	100.6	20.2	23.4	11.3	6.5	1.05	29.9	63.1	69.5	25.1	7490	14.27
G1	106	G	1	LOW-PLACEBO	F	932.1	0	1	0	10/5/2021 6:48	6	6			6H G	5	7.465	6.24	24.3	5	105.6	101.5	3	-5.4	0.9		3.7	147	1.34	100	3.2	1				9.9		100.7	13.2	16.9	10.8	9	1.39	33.7		78.7	24.7	7519	12.79
H1	111	H	1	HIGH-CON	M	1165	0	0	1	10/5/2021 6:13	6	6			6H H	5.2	7.528	4.82	17.6	5.2	101.4	100.3	0.9	-1.4	0.2		4	164	1.15	110	13.6	1.8		11.9	2.54	7.3	30.7	100.6	23.6	27.6	11.5	6.8	1.23	30	63.2	69.8	25.7	7494	14.37
I1	107	I	1	HIGH-SE	M	1075	0	1	1	10/5/2021 6:45	6	6			6H I	5.7	7.51	5.17	30.1	5.7	101.3	100.5	0.6	-1.3	0.2		3.7	143	1.39	102	21.2	1.5		13.5	2.56	7.9	31.2	100.7	9.3	13.1	12.8	7.3	1.47	30.9	64.5	72	28.3	7500	14
J1		J	1	LOW-IAIP	M	1324.5	1	1	0	10/5/2021 6:19	6	6			6H J	3.8	7.374	7.72	4.73	3.8	77.4	74.7	2.8	21.8	0.7		3.9	174	0.79	116	2.4	1.2		6.4	2.96	8.6	31.4	100.6	24.2	28.1	8.1	7.8	0.78	33.8	74.8	79.7	18.6	7503	11.1
K1		K	1	LOW-CON	M	1206.8	0	0	0	10/5/2021 6:07	6	6			6H K	5.5	7.5	5.54	37.4	5.5	101.5	100.6	0.7	-1.5	0.2		4.6	143	1.4	100	3.2	1.8		13.2	2.61	9.1	32.2	100.6	10.5	15.1	12.3	8.4	1.48	32.3	67.8	75.3	27.3	7512	13.56
L1	113	L	1	HIGH-CON	F	1129	0	0	1	10/5/2021 6:42	6	6			6H L	5.7	7.559	4.96	28.1	5.7	101.2	100.4	0.7	-1.2	0.1		3.6	148	1.2	104	11.6	1.6		13.4	2.4	11	34	100.7	11.1	14.7	12.7	10.2	1.31	33.2	68.8	77	28.3	7535	14.23
M1	114	M	1	LOW-IAIP	F	1191	1	1	0	10/5/2021 6:46	6	6			6H M	5.4	7.444	5.92	31.5	5.4	101.5	100.4	0.8	-1.5	0.3		3.6	189	0.51	130	2.7	0.9		12.7	2.78	6.3	29.6	100.7	28.1	31.7	11.9	5.7	0.53	30.4	64.4	71.2	26.6	7479	13.15
N1		N	1	HIGH-SE	M	1468	0	1	1	10/5/2021 6:59	6	6			6H N	4.4	7.205	10.5	24.4	4.4	105.4	101.1	3.1	-5.2	1		2.8	163	1.16	117	14.7	1.2				3.2		100.7	14.9	17.8	9.5	2.6	1.04	31.2		75.2	21.8	7427	7.96
O1		O	1	LOW-PLACEBO	M	1314.8	0	1	0	10/5/2021 7:12	6	6			6H O	5.6	7.563	5.45	35	5.6	101.1	100.4	0.6	-1.1	0.1		3.6	169	1.29	114	2	1.3		13.2	2.4	14.6	37.2	100.7	18.2	21.7	12.4	13.4	1.41	36.8	76.5	85.2	27.5	7570	13.69
P1		P	1	LOW-IAIP	M	981	1	1	0	10/5/2021 6:52	6	6			6H P	6	7.049	12.4	2.55	6	29.3	28.6	1.6	68.9	0.9		4.4	157	1.07	106	6.4	7.8		3.9	3.65	-4.8	18.7	100.7	25.6	30	13	-5.8	0.88	25.7	59.5	63.9	29.4	7287	5.82
R1	104	R	1	LOW-IAIP	F	988.2	1	1	0	10/5/2021 7:08	6	6			6H R	3.3	7.518	5.22	8.43	3.3	103	98.5	3.5	-2.9	0.9		4.3	141	1.43	99	2.7	1.7				8.9		100.8	10.1	14.4	7.1	8.2	1.53	31.8		74	16.4	7511	13.95
S1	112	S	1	LOW-CON	F	1004	0	0	0	10/5/2021 6:27	6	6			6H S	6	7.515	5.75	22.6	6	101.1	100.5	0.6	-1.1	0		4.2	160	1.03	109	4	1.2		13.9	2.56	11.8	34.5	100.6	16.4	20.6	13.4	10.7	1.09	34.7	72	80.8	29.6	7540	13.33
A2	117	A	2	LOW-IAIP	m	1210	1	1	0	17-05-2021 19:27	6	6			6H A	5.7	7.448	6.43	4.54	5.7	80	78.9	1.3	19.7	0.1		4.5	148	1.35	106	2.6	1.4		10.2	2.67	9.3	31.8	100.2	8.7	13.2	12.6	8.3	1.39	33.3	70.4	78	28.2	7510	12.48
B2	123	B	2	LOW-IAIP	f	1015	1	1	0	17-05-2021 19:50	6	6			6H B	5.8	7.514	5.1	8.61	5.8	97.8	96.7	1.2	2.2	-0.1		3.8	172	0.83	118	2.8	1.7		12.8	2.49	7.8	31.1	100.3	23	26.8	12.8	7.3	0.89	30.8	64.1	71.6	28.6	7500	13.99
C2	126	C	2	LOW-IAIP	f	1210	1	1	0	17-05-2021 20:02	6	6			6H C	7	7.478	5.4	7.82	7	96.3	94.9	1.5	3.6	0		4.5	144	1.38	101	3.7	1.9		15	2.2	6.4	29.8	100.3	12.9	17.5	15.4	5.9	1.44	30	61.3	70	34.5	7482	13.64
D2	136	D	2	LOW-PLACEBO	f	1041	0	1	0	17-05-2021 18:52	6	6			6H D	3.8	7.582	4.38	13.4	3.8	104.7	100.8	3.1	-4.5	0.6		4	183	0.59	132	3.2	1.2				9		100.2	19.6	23.6	8.2	8.3	0.65	30.9		71.5	18.8	7513	14.79
E2	133	E	2	LOW-PLACEBO	f	1260.6	0	1	0	17-05-2021 18:26	6	6			6H E	6.8	7.534	5.05	25.8	6.8	100.8	100.2	0.5	-0.8	0.1		4.1	154	1.02	115	2.9	1.1		15.8	2.43	9.3	32.5	100.2	6.7	10.8	15.1	8.7	1.1	32	65	74.2	33.6	7517	14.02
F2	119	F	2	HIGH-SE	m	1189	0	1	1	17-05-2021 19:39	6	6			6H F	6.3	7.462	5.26	4.44	6.3	78.7	77.6	1.3	21	0.1		4	248	0.48	203	16.3	2.3		11.1	2.69	4.4	27.8	100.3	17.3	21.3	14	4.1	0.5	28.2	58.8	65.9	31.3	7458	13.8
G2	135	G	2	HIGH-CON	f	1387	0	0	1	17-05-2021 18:42	6	6			6H G	6.5	7.517	4.77	7.9	6.5	96.9	95.9	1	3.1	0		3.4	163	0.92	120	23.2	2.1		14.1	2.03	6.1	29.7	100.2	13.9	17.3	14.4	5.8	0.98	29	59.5	67.4	32	7481	14.34
H2	138	H	2	HIGH-SE	m	1243	0	0	1	17-05-2021 19:49	6	6			6H H HEART	6.2	7.463	5.64	9.05	6.2	98.9	97.7	1.3	1.1	-0.1		3.1	143	1.34	104	4.8	1.8		13.8	2.64	6.5	29.8	100.3	9.4	12.5	13.8	5.9	1.39	30.3	63	70.8	30.7	7482	13.37
I2	132	I	2	HIGH-CON	m	1015.2	0	0	1	17-05-2021 18:17	6	6			6H I	5.8	7.515	4.42	11.7	5.8	100.1	99.2	0.9	-0.1	0		3.8	196	0.52	131	14.7	2.1		13.2	2.48	3.8	27.9	100.2	38.2	42	13	3.8	0.56	26.7	55.6	62.2	28.9	7455	14.74
J2	128	J	2	LOW-IAIP	f	678	1	1	0	17-05-2021 17:58	6	6			6H J	5.9	7.416	5.93	37.6	5.9	101.4	100.6	0.7	-1.4	0.1		4.7	154	1.07	108	5.5	1.1		13.9	2.81	4	27.6	100.2	17.2	21.9	13	3.5	1.08	28.5	60.1	67	29	7450	13.03
K2	141	K	2	LOW-PLACEBO	m	1405	0	1	0	17-05-2021 20:13	6	6			6H K	5.7	7.538	5.04	7.03	5.7	96.2	94.9	1.3	3.7	0.1		4.1	200	0.79	138	3.1	1.1		12.2	1.95	9.5	32.6	100.3	30.1	34.2	12.6	8.9	0.85	32.1	66.8	74.5	28.1	7519	14.06
L2	131	L	2	LOW-CON	m	1202.8	0	0	0	17-05-2021 18:12	6	6			6H L	6.5	7.499	4.55	22.4	6.5	101	100.2	0.5	-1	0.3		5	161	0.7	104	12.3	2		14.9	2.56	3.4	27.5	100.2	31	36	14.4	3.4	0.74	26.6	54.6	61.9	32	7450	14.59
M2	140	M	2	LOW-IAIP	m	1261	1	1	0	17-05-2021 20:07	6	6			6H M	6	7.565	4.56	7.43	6	96.9	95.7	1.1	3.1	0.1		4.1	158	0.97	114	3.4	1.3		13.1	1.87	8.8	32.1	100.3	13.8	17.9	13.4	8.4	1.07	30.9	63.7	71.6	29.8	7513	14.59
N2	115	N	2	HIGH-SE	m	791	0	1	1	17-05-2021 19:58	6	6			6H N	5.9	7.371	7.04	5	5.9	82.1	80.8	1.3	17.6	0.3		3	165	0.93	114	16.2	2		10.8	2.81	5.3	28.2	100.3	19.5	22.5	13	4.5	0.92	30.6	65.1	72.2	29.1	7461	11.79
O2	134	O	2	LOW-CON	m	1031	0	0	0	17-05-2021 18:37	6	6			6H O	5.4	7.512	5.28	6.69	5.4	96.6	95	1.4	3.3	0.3		4.5	147	1.21	104	2.4	1.4		11.6	1.71	8.8	31.8	100.2	11	15.5	11.8	8.1	1.29	31.7	66.7	73.8	26.5	7509	13.77
P2	129	P	2	LOW-IAIP	f	1098.7	1	1	0	17-05-2021 19:31	6	6			6H P	5.9	7.533	5.25	5.14	5.9	88.9	87.6	1.4	10.9	0.1		4.2	147	1.27	103	2.5	1.5		11.7	2.29	10.5	33.2	100.2	11	15.2	13.1	9.7	1.37	33.1	68.7	76.9	29.2	7528	13.81
Q2	124	Q	2	HIGH-SE	f	793.5	0	1	1	17-05-2021 18:57	6	6			6H Q	5.6	7.524	4.88	8.75	5.6	99.8	98.6	1	0.2	0.2		2.8	178	0.69	113	4.3	1.2		12.6	2.54	7.3	30.7	100.2	35	37.8	12.4	6.8	0.73	30.1	62.8	70	27.6	7494	14.22
R2	118	R	2	HIGH-SE	f	1303	0	1	1	17-05-2021 18:07	6	6			6H R	6.1	7.403	6.22	19.7	6.1	101	100.2	0.8	-1	0		3	183	0.75	117	7.8	1.1		13.9	2.87	4.3	27.8	100.2	36.4	39.4	13.5	3.7	0.75	29	61.1	68.3	29.9	7452	12.71
S2	125	S	2	LOW-IAIP	m	1327	1	1	0	17-05-2021 18:47	6	6			6H S	5.7	7.522	5.17	9.08	5.7	99.1	97.8	1	0.9	0.3		4.4	157	1.03	112	3.4	1		12.6	2.57	9	32.1	100.2	13.4	17.7	12.5	8.3	1.1	31.8	66.4	74	28	7512	13.89
T2	138	T	2	HIGH-CON	m	1193	0	0	1	17-05-2021 19:07	6	6			6H T	6.1	7.495	5.1	8.26	6.1	98	97	1	2	0		3.9	159	1.08	114	20	1.3		13.5	2.55	6.2	29.7	100.2	16	19.9	13.5	5.8	1.14	29.5	61.2	68.7	30.2	7481	13.97
U2	121	U	2	LOW-PLACEBO	m	741.5	0	1	0	17-05-2021 19:17	6	6			6H U	4.7	7.534	4.45	9.12	4.7	103.1	99.2	3.1	-3	0.7		4.3	167	0.78	116	3.3	2.6				5.5		100.2	23	27.3	10.1	5.2	0.84	28.1		65.3	23.2	7474	14.71
V2	127	V	2	LOW-PLACEBO	m	1281	0	1	0	17-05-2021 19:35	6	6			6H V	4.2	7.505	5.29	3.47	4.2	67.9	65.7	2.5	31.1	0.7		4	199	0.57	135	4.4	1.6		6.3	2.57	8.2	31	100.3	32.3	36.3	9.2	7.5	0.61	31.3	67.6	72.9	20.9	7503	13.76
X2	139	X	2	LOW-PLACEBO	m	1111	0	1	0	17-05-2021 19:53	6	6			6H X	4.7	7.592	4.32	6.44	4.7	101.1	97	3.3	-1.1	0.8		4.2	156	1.07	107	2.5	2.4		10.2	2.78	9.5	32.7	100.3	17	21.2	10.1	8.9	1.19	31.2	65.8	72.1	23.2	7520	14.87
Y2	122	Y	2	HIGH-SE	m	1340.4	0	1	1	17-05-2021 18:32	6	6			6H Y	5.8	7.569	4.49	9.08	5.8	98.5	97.4	1	1.5	0.1		3.7	145	0.91	105	9.9	1.9		12.9	2.37	8.7	32.1	100.2	9.5	13.2	12.9	8.3	1	30.8	63.6	71.2	28.8	7512	14.66
Z2	116	Z	2	LOW-IAIP	f	1270	1	1	0	17-05-2021 19:13	6	6			6H Z	5.8	7.429	6.2	7.52	5.8	95.7	94.6	1	4.3	0.1		4	185	1.03	120	2.8	1.2		12.4	2.27	6.4	29.6	100.2	33.9	37.9	12.7	5.7	1.05	30.8	64.9	72.2	28.4	7478	12.74
Æ2	120	Æ	2	LOW-IAIP	m	1180.8	1	1	0	17-05-2021 18:21	6	6			6H AE	5.8	7.482	5.52	5.67	5.8	91.6	90.4	1.2	8.3	0.1		4.3	143	1.4	101	2.3	1		11.9	2.25	7.5	30.6	100.2	10.8	15	12.8	6.8	1.46	30.9	64.8	72.2	28.6	7493	13.49
Ø2	137	Ø	2	LOW-CON	f	1275	0	0	0	17-05-2021 19:03	6	6			6H OE	6.3	7.508	5.09	6.92	6.3	96.7	95.2	1.4	3.3	0.1		4.5	166	0.87	112	3.8	1.3		13.7	1.76	7.3	30.6	100.2	23.7	28.2	14	6.8	0.93	30.3	62.5	70.6	31.3	7493	13.99
Å2	130	Å	2	LOW-PLACEBO	m	902	0	1	0	17-05-2021 18:03	6	6			6H AA	7.1	7.606	3.87	10.3	7.1	99.7	99.1	0.6	0.3	0		4.8	146	1.07	101	5.8	2.2		15.9	2.22	7.4	31.4	100.2	16.6	21.5	15.7	7.6	1.2	28.9	57.9	66.7	34.8	7503	15.36
A3	150	A	3	HIGH-SE	f	725	0	1	1	25-05-2021 19:21	6	6			6H A	5.2	7.419	5.69	31.7	5.2	101.7	100.5	1	-1.7	0.2		3.5	145	1.47	106	19.9	1.9		12.2	2.81	3.1	26.9	100.6	10.9	14.3	11.4	2.8	1.48	27.6	58.9	64.7	25.5	7440	13.39
ALPHA3	149	ALPHA	3	LOW-IAIP	m	847	1	1	0	25-05-2021 19:47	6	6			6H ALPHA	5.2	7.376	7.05	26.2	5.2	101.2	100.1	0.9	-1.2	0.2		3.9	147	1.11	105	3.3	1		12.2	2.92	5.8	29	100.6	10.4	14.2	11.6	5	1.1	30.9	66.4	73	25.8	7467	11.86
B3	143	B	3	HIGH-SE	f	794	0	1	1	25-05-2021 18:58	6	6		1	6H B	5.4	7.257	8.55	3.75	5.4	59.9	58.6	1.5	39.3	0.6		3.6	143	1.35	101	32	1.8		7.1	3.22	1.4	24.6	100.6	13.4	17	11.8	0.8	1.24	28.6	63	68.4	26.5	7405	10.16
BETA3	153	BETA	3	LOW-IAIP	m	777	1	1	0	25-05-2021 18:00	6	6			6H BETA	4.7	7.576	4.52	20	4.7	105.7	101.6	3.2	-5.5	0.7		4.9	142	1.17	104	2.6	1.6				9.5		100.7	6.7	11.7	10.1	8.9	1.28	31.5		72.9	23.2	7520	14.72
D3	145	D	3	HIGH-SE	m	949.7	0	1	1	25-05-2021 18:08	6	6			6H D	5.1	7.479	5.47	6.66	5.1	96	94.5	1.4	3.9	0.2		3.8	141	1.23	102	21.8	1.8		11	1.86	6.9	30.2	100.6	8.1	11.9	11.2	6.4	1.28	30.5	64.6	71.1	25.2	7488	13.64
G3	164	G	3	LOW-CON	f	993	0	0	0	25-05-2021 19:02	6	6			6H G	5.1	7.477	5.66	17	5.1	101.2	99.8	1.2	-1.2	0.2		4.5	149	1.14	105	4.5	1.1		11.8	2.65	7.8	31	100.6	13.2	17.7	11.4	7.2	1.19	31.4	66.5	73.2	25.4	7497	13.43
GAMMA3	148	GAMMA	3	HIGH-SE	m	1159	0	1	1	25-05-2021 19:40	6	6			6H GAMMA	5.2	7.452	5.48	8.39	5.2	98.9	97.2	1.6	1.1	0.1		3.5	147	1.26	104	14.6	1.8		11.6	2.72	4.7	28.3	100.6	14.1	17.6	11.6	4.3	1.3	28.7	60.8	67	25.9	7461	13.64
H3	146	H	3	HIGH-SE	f	1104	0	1	1	25-05-2021 19:55	6	6			6H H	4.8	7.483	4.84	22.3	4.8	105.9	101.6	3.3	-5.7	0.8		3.3	144	1.36	104	20.6	1.8				3.7		100.6	12.7	16	10.4	3.5	1.43	27.2		63.4	23.8	7451	14.35
I3	152	I	3	LOW-IAIP	f	996	1	1	0	25-05-2021 19:11	6	6			6H I	4.9	7.458	5.66	40.8	4.9	106.2	102.2	3.1	-6	0.7		4.9	142	1.33	101	7.8	2.2				6.2		100.6	10.8	15.7	10.5	5.6	1.37	30		70.2	24.1	7478	13.43
J3	155	J	3	HIGH-SE	m	885	0	1	1	25-05-2021 18:31	6	6			6H J	5	7.464	5.05	24.8	5	105.7	101.7	3.1	-5.5	0.7		3.5	146	1.34	104	15.7	1.9				3.4		100.6	15.1	18.6	10.7	3.2	1.39	27.1		63.4	24.6	7446	14.12
K3	161	K	3	HIGH-CON	f	984	0	0	1	25-05-2021 18:17	6	6			6H K	4.9	7.522	4.3	11.7	4.9	104.8	100.9	3.2	-4.6	0.5		4.1	138	1.35	100	41	2.1				3.6		100.6	11.5	15.5	10.6	3.5	1.45	26.5		61.5	24.2	7452	14.96
L3	151	L	3	LOW-IAIP	m	1175	1	1	0	25-05-2021 18:47	6	6			6H L	4	7.421	6.16	25.3	4	106	101.4	3.4	-5.7	0.9		4.2	141	1.4	100	2.4	0.9				5.6		100.6	10.4	14.6	8.7	5.1	1.42	30		70.5	20	7470	12.86
N3	159	N	3	LOW-PLACEBO	m	1219	0	1	0	25-05-2021 19:51	6	6			6H N	4.5	7.529	5.09	39.1	4.5	106.1	102	3.2	-5.9	0.7		3.8	154	1.13	107	3.9	1.1				9.1		100.6	15.1	19	9.8	8.4	1.22	31.8		73.9	22.4	7513	14.07
O3	157	O	3	LOW-PLACEBO	f	849	0	1	0	25-05-2021 18:26	6	6			6H O	4.9	7.555	4.05	28.7	4.9	106	102	3.1	-5.8	0.7		4	154	1.13	110	6.7	2.3				4.6		100.6	17.2	21.2	10.5	4.5	1.23	26.9		62.4	24.1	7465	15.25
P3		P	3	LOW-CON	m	1279	0	0	0	25-05-2021 19:26	6	6			6H P	3.9	7.532	4.62	42.2	3.9	106.1	102	3.1	-5.9	0.8		4.3	142	1.46	101	2.9	1.4				6.4		100.6	11.4	15.8	8.3	5.9	1.57	29.1		67.5	19.1	7483	14.6
Q3	165	Q	3	HIGH-CON	m	676	0	0	1	25-05-2021 19:07	6	6			6H Q	3.4	7.513	4.86	29	3.4	105.9	101.8	3.1	-5.7	0.8		3.9	144	1.28	102	19.5	1.7				6.3		100.6	12.7	16.6	7.3	5.8	1.36	29.3		68.2	16.7	7481	14.33
R3	160	R	3	LOW-CON	m	637	0	0	0	25-05-2021 18:12	6	6			6H R	4.9	7.552	4.22	47	4.9	106.1	102.1	2.9	-5.9	0.9		4.4	143	1.32	101	2.5	2.4				5.5		100.6	14.1	18.5	10.6	5.2	1.43	27.8		64.4	24.3	7474	15.06
T3	144	T	3	LOW-PLACEBO	m	1017	0	1	0	25-05-2021 19:16	6	6		1	6H T	5	7.383	7.12	13.2	5	105	100.7	3.4	-4.8	0.7		4.2	146	1.36	101	3.5	1				6.7		100.6	12.6	16.7	10.7	5.9	1.35	31.8		74.9	24.6	7479	11.78
U3	142	U	3	LOW-PLACEBO	f	909	0	1	0	25-05-2021 18:03	6	6		1	6H U	4.9	7.221	9.64	10.3	4.9	101.6	97.8	3	-1.5	0.7		4.3	141	1.45	102	4	1		10.9	4.21	2	25.6	100.7	10.1	14.3	10.7	1.3	1.32	29.7	65.9	71.5	24.4	7410	8.93
V3	158	V	3	LOW-PLACEBO	f	795	0	1	0	25-05-2021 19:34	6	6			6H V	5	7.484	5.71	35.8	5	106	101.8	3.1	-5.8	0.9		4.3	143	1.32	101	5.7	1.3				8.7		100.7	9.9	14.2	10.8	8	1.38	32.2		75	24.7	7507	13.37
X3	162	X	3	LOW-CON	f	828	0	0	0	25-05-2021 18:36	6	6			6H X	4.1	7.537	4.37	39.3	4.1	106.1	102.2	3.1	-5.9	0.6		4.3	141	1.08	100	2.7	2.8				5.2		100.6	13.5	17.8	8.9	4.9	1.16	27.8		64.6	20.4	7470	14.89
Y3	156	Y	3	LOW-PLACEBO	f	702	0	1	0	25-05-2021 18:51	6	6			6H Y	5.6	7.52	4.85	26.6	5.6	101.3	100.3	0.9	-1.3	0.1		4.6	144	1.32	103	3.3	1.6		13.1	2.49	6.9	30.4	100.6	10.8	15.4	12.5	6.5	1.41	29.7	62	69.1	27.8	7490	14.33
Æ3	163	Æ	3	HIGH-CON	f	908	0	0	1	25-05-2021 18:42	6	6			6H AE	5	7.547	4.15	9.61	5	103.9	100	3.2	-3.8	0.6		3.6	153	1.02	109	16.1	1.7				4.6		100.6	16.9	20.5	10.8	4.5	1.1	27		62.6	24.8	7464	15.14
Ø3	154	Ø	3	LOW-IAIP	f	826	1	1	0	25-05-2021 19:30	6	6			6H OE	5.5	7.518	5.33	40.7	5.5	101.5	100.3	0.8	-1.5	0.4		4	157	1.01	111	2.5	1.3		13	2.5	9.6	32.6	100.6	13.5	17.5	12.1	8.8	1.08	32.5	68	75.6	27	7518	13.8
Å3		Å	3	LOW-IAIP	f	970	1	1	0	25-05-2021 18:21	6	6			6H AA	4.9	7.582	4.27	37.5	4.9	106.2	102.3	3.1	-6	0.6		4.1	141	1.32	101	3.4	1.1				8.3		100.6	10.7	14.8	10.6	7.8	1.46	30.1		69.7	24.2	7507	14.99
B3	143	B	3	HIGH-SE	f	794	0	1	1	25-05-2021 21:38	8	6	1		B BEFORE KILL 8H	4.8	7.022	11.1	2.47	4.8	26.1	25.5	1.1	72.3	1.1		4.9	139	1.4	97	> 25	7.5		2.8	3.76	-9.4	16.1	100.7	20.1	25	10.6	-9.2	1.13	21.5	51.1	54	23.8	7228	7.33
T3	144	T	3	LOW-PLACEBO	m	1017	0	1	0	25-05-2021 21:42	8	6	1		8H T	4.6	7.051	15	5.12	4.6	69.1	66.6	2.6	29.8	1		3.9	140	1.57	98	8.699999999999999	1.6		6.9	3.8	0.7	24.1	100.7	9.9	13.9	9.9	0	1.3	31.2	73.1	77.7	22.6	7377	2.86
U3	142	U	3	LOW-PLACEBO	f	909	0	1	0	25-05-2021 21:33	8	6	1		U BEFORE EUTHANASIA	3.8	7.061	12.2	3.03	3.8	31.2	30.5	1.2	67.2	1.1		5.7	130	1.54	95	18.3	3.5		2.7	4.13	-4.3	20.4	100.7	9.4	15	8.4	-4	1.28	26	61.7	64.6	19	7320	6.01
B1		B	1	HIGH-SE	F	1222	0	1	1	10/5/2021 11:58	12	12		1	12H B	4.8	7.382	6.61	5.14	4.8	88.4	85	3.2	11.1	0.7		2.6	161	0.93	114	10.6	2.6		9.2	2.33	4.3	27.7	101	16.9	19.5	10.3	3.8	0.92	29.4	63.7	69.3	23.6	7452	12.44
C1		C	1	LOW-PLACEBO	F	1065.9	0	1	0	11/5/2021 12:01	12	12			12H C	5.3	7.294	8.16	4.36	5.3	75.2	73.6	1.5	24.3	0.6		3.6	159	0.87	116	2.4	1.4		8.8	2.86	3.2	26.3	101	13.3	16.9	11.5	2.5	0.82	29.7	64.9	70.7	26	7430	10.69
E1	108	E	1	LOW-PLACEBO	M	1174	0	1	0	11/5/2021 1:02	12	12			12H E	5	7.295	8.71	4.23	5	72.1	70.3	2.5	27.2	0		3.6	147	1.5	105	5.6	1.3		8	2.94	5.3	28	101	10.3	13.9	11	4.4	1.41	31.8	69.7	75.7	24.8	7456	10.07
F1	105	F	1	HIGH-SE	F	1038.5	0	1	1	11/5/2021 12:22	12	12			12H F	5.3	7.104	11.3	3.68	5.3	54.1	53	0.9	44.9	1.2		3.4	144	1.5	106	34	5.1		6.3	3.46	-3	20.9	101	11.3	14.7	11.5	-3.5	1.27	26.6	61.1	65.6	25.9	7329	7.09
G1	106	G	1	LOW-PLACEBO	F	932.1	0	1	0	11/5/2021 12:46	12	12			12H G	4.9	7.059	15.9	4.28	4.9	53.4	51.8	1.9	45.2	1.1		3.5	144	1.42	99	4.5	2.1		5.8	4.07	3.3	25.7	101	11.7	15.2	10.7	2.1	1.17	33.6	78.4	83.6	24.3	7406	1.97
H1	111	H	1	HIGH-CON	M	1165	0	0	1	11/5/2021 12:11	12	12			12H H	5.6	7.532	4.84	5.02	5.6	91.1	89.7	1.2	8.8	0.3		3.4	145	1.38	105	12	1.8		11.4	2	7.8	31	101.1	9	12.4	12.4	7.3	1.49	30.5	63.6	70.8	27.8	7500	14.44
I1	107	I	1	HIGH-SE	M	1075	0	1	1	11/5/2021 12:40	12	12			12H I	5.2	7.314	7.41	5.44	5.2	89.4	87.6	1.4	10.4	0.6		3.2	145	1.48	107	16.6	2.9		10.3	2.39	2	25.7	101	10.1	13.3	11.4	1.5	1.41	28.2	61.4	67.1	25.6	7419	11.53
J1		J	1	LOW-IAIP	M	1324.5	1	1	0	11/5/2021 12:17	12	12		1	12H J	3.6	7.116	9.55	14	3.6	103.2	98.9	3.3	-3.1	0.9		4.1	143	1.31	101	7.4	9.1				-6.4		101	19.6	23.7	7.8	-5.8	1.12	23		56.5	17.9	7296	9.130000000000001
K1		K	1	LOW-CON	M	1206.8	0	0	0	11/5/2021 12:07	12	12			12H K	5.2	7.542	4.27	11.2	5.2	100.5	99.6	1.1	-0.5	-0.2		4.4	195	0.52	131	6.5	1.5		11.9	2.48	5	28.8	101.1	36.8	41.2	11.6	4.8	0.56	27.5	57.6	63.7	25.9	7469	15.09
L1	113	L	1	HIGH-CON	F	1129	0	0	1	11/5/2021 12:30	12	12			12H L	5.3	7.451	6.16	3.94	5.3	78.2	76.6	1.6	21.4	0.4		3.4	158	1.21	109	11.7	1.2		9.1	2.39	8.1	30.8	101	17.2	20.5	11.6	7.3	1.25	32.1	68.4	75.1	26	7499	12.95
M1	114	M	1	LOW-IAIP	F	1191	1	1	0	11/5/2021 12:36	12	12			12H M	5.3	7.316	8.94	2.84	5.3	43.2	42.5	1.1	55.8	0.6		4.1	160	0.89	103	3.4	1.5		5.1	3.17	8	29.8	101	22.2	26.3	11.6	6.8	0.85	34.2	74.9	81.3	26.1	7488	9.810000000000001
N1		N	1	HIGH-SE	M	1468	0	1	1	11/5/2021 12:58	12	12			12H N	3.7	7.178	10.7	11.5	3.7	103.5	99.3	3	-3.4	1.1		2.9	168	1.08	117	28	2.7				1.5		101	21	23.9	8	1.3	0.96	29.9		72.5	18.4	7408	7.79
O1		O	1	LOW-PLACEBO	M	1314.8	0	1	0	11/5/2021 1:11	12	12			12H O	4.9	7.158	13.3	32.2	4.9	105.4	101.3	2.9	-5.2	1		3.2	156	1.52	109	4.6	0.8				6.5		101	11.7	14.9	10.6	5.2	1.33	35.2		85.8	24.4	7457	4.95
R1	104	R	1	LOW-IAIP	F	988.2	1	1	0	11/5/2021 1:07	12	12			12H R	3.3	7.325	6.87	2.59	3.3	44.8	43.5	2	53.5	1		3.7	143	1.35	102	3	4.4		3.2	2.82	0.8	24.7	101	14.3	18	7.1	0.8	1.29	26.8	60.6	63.7	16.2	7410	12.15
S1	112	S	1	LOW-CON	F	1004	0	0	0	11/5/2021 12:27	12	12			12H S	5.8	7.476	5.53	8.28	5.8	98.1	97.1	0.9	1.9	0.1		5.1	154	1.13	109	5.4	3.4		12.8	2.63	7	30.2	101	14.3	19.4	12.9	6.4	1.18	30.6	63.9	71.3	28.7	7488	13.66
A2	117	A	2	LOW-IAIP	m	1210	1	1	0	18-05-2021 01:27	12	12			12H A	5.5	7.178	10.3	3.27	5.5	43.9	43.3	0.7	55.3	0.7		4.2	179	0.73	119	2.8	3.2		5.4	3.6	0.3	23.2	100.4	31.1	35.3	12.2	-0.6	0.65	28.7	64.5	69.7	27.3	7380	8.130000000000001
B2	123	B	2	LOW-IAIP	f	1015	1	1	0	18-05-2021 01:50	12	12			12H B	5.2	7.426	5.78	4.43	5.2	75.8	74.3	1.5	23.7	0.5		3.4	172	0.78	117	3.1	1.3		8.8	2.87	4.1	27.4	100.4	26.6	30	11.5	3.7	0.79	28.5	61	66.9	25.8	7453	13.25
C2	126	C	2	LOW-IAIP	f	1210	1	1	0	18-05-2021 00:54	12	12			12H C	5.2	7.1	9.53	4.33	5.2	57.8	56.4	1.8	41.2	0.6		6.7	141	1.01	98	41	0.9		6.6	3.85	-7.5	17.8	100.4	20.2	26.9	11.3	-7.5	0.86	22.2	50.9	54.6	25.4	7266	9.01
D2	136	D	2	LOW-PLACEBO	f	1041	0	1	0	18-05-2021 00:51	12	12			12H D	3.6	7.365	6.27	3.82	3.6	69.1	66.8	2.6	29.8	0.8		3.8	177	0.8	129	3.4	1.8		5.5	2.79	1.5	25.4	100.4	21.4	25.3	7.9	1.4	0.79	26.9	59.8	63.4	17.9	7419	12.69
E2	133	E	2	LOW-PLACEBO	f	1260.6	0	1	0	18-05-2021 00:25	12	12			12H E	5.7	7.398	6.44	6.84	5.7	92.9	91.4	1.5	7	0.1		4.2	157	0.93	111	8.1	0.7		11.8	2.59	4.9	28.2	100.4	16.5	20.7	12.6	4.3	0.93	29.7	63.2	70	28.1	7459	12.49
F2	119	F	2	HIGH-SE	m	1189	0	1	1	18-05-2021 01:40	12	12		1	12H F	5.9	7.167	10.5	4.65	5.9	70.8	69.5	1.2	28.7	0.6		3.6	143	1.45	104	31	4		9.4	3.34	0.1	23.2	100.4	10.5	14.2	13.1	-1	1.28	28.7	63.8	69.7	29.3	7373	7.86
G2	135	G	2	HIGH-CON	f	1387	0	0	1	18-05-2021 00:39	12	12			12H G	6.2	7.46	5.2	12.1	6.2	100	99.1	0.7	0	0.2		3.8	140	1.26	103	37	1.6		14	2.63	3.9	27.7	100.4	9.1	12.9	13.8	3.6	1.3	27.7	57.6	64.8	30.6	7452	13.9
I2	132	I	2	HIGH-CON	m	1015.2	0	0	1	18-05-2021 00:16	12	12			12H I	5.7	7.482	4.76	11.1	5.7	100.3	99.1	1.1	-0.3	0.1		3.2	181	0.71	117	11.4	1.6		12.9	2.59	3.3	27.3	100.4	37.7	40.8	12.6	3.2	0.75	26.7	55.9	62.3	28.2	7446	14.4
J2	128	J	2	LOW-IAIP	f	678	1	1	0	17-05-2021 23:58	12	12			12H J	5.1	7.421	5.81	7.62	5.1	100.5	99.1	1.1	-0.5	0.3		3.8	167	0.99	118	1.8	1.1		11.4	2.78	3.9	27.6	100.4	20.7	24.5	11.3	3.5	1	28.4	60.6	66.6	25.2	7450	13.2
K2	141	K	2	LOW-PLACEBO	m	1405	0	1	0	18-05-2021 02:03	12	12			12H K	5.2	7.228	9.75	4.35	5.2	57.7	57.1	1	41.9	0		3.6	173	0.91	129	4.7	0.8		6.8	3.88	2.9	25.6	100.4	14.2	17.8	11.6	2	0.82	30.5	67.8	73.3	25.8	7420	8.76
L2	131	L	2	LOW-CON	m	1202.8	0	0	0	18-05-2021 00:12	12	12			12H L	6.3	7.529	4.45	12.1	6.3	99.8	99.1	0.6	0.2	0.1		3.6	207	0.44	143	4.3	1.2		14.3	2.44	5.1	29	100.4	37	40.6	14.1	5.1	0.47	27.8	57.2	64.6	31.3	7472	14.74
M2	140	M	2	LOW-IAIP	m	1261	1	1	0	18-05-2021 01:59	12	12			12H M	5.6	7.346	6.75	18.3	5.6	100.6	99.5	0.7	-0.6	0.4		3.6	161	1.06	115	4.6	0.7		12.9	3.03	2	25.8	100.4	18.4	22	12.4	1.6	1.03	27.7	59.3	65.5	27.7	7421	12.15
N2	115	N	2	HIGH-SE	m	791	0	1	1	18-05-2021 00:26	12	12			12H N - OUT OF ORDER	5.6	6.994	13.3	5.19	5.6	63.5	62.2	1.2	35.7	0.9		4.5	168	1.2	116	34	7.2		7.9	4.24	-7.2	17.6	100.4	27.7	32.2	12.3	-7.8	0.96	24.2	57	61.1	27.7	7246	4.77
O2	134	O	2	LOW-CON	m	1031	0	0	0	18-05-2021 00:35	12	12			12H O	5.1	7.55	4.21	7.25	5.1	97.1	95.5	1.2	2.9	0.4		4.1	157	0.94	109	4.2	1.4		11	2.42	5.2	29	100.4	20	24.1	11.2	5	1.02	27.6	58	64	25	7472	15.02
P2	129	P	2	LOW-IAIP	f	1098.7	1	1	0	18-05-2021 01:32	12	12			12H P	5.7	7.296	8.08	5.9	5.7	82.8	81.4	1.1	16.9	0.6		3.4	201	0.58	144	3.9	0.8		10.5	3.31	3.1	26.2	100.4	27.5	30.9	12.6	2.2	0.55	29.5	64	70.4	28.1	7427	10.65
Q2	124	Q	2	HIGH-SE	f	793.5	0	1	1	18-05-2021 00:58	12	12			12H Q	4.4	7.386	6.11	5.59	4.4	93	91.6	3	6.9	-1.5		2.9	196	0.91	146	10.3	1.7		9	2	2.4	26.3	100.4	22.3	25.1	9.5	2.2	0.9	27.5	59.9	64.7	21.6	7431	12.88
R2	118	R	2	HIGH-SE	f	1303	0	1	1	18-05-2021 00:06	12	12		1	12H R	5.6	7.125	10.7	3.29	5.6	50.1	49.4	0.8	49.2	0.6		2.8	168	0.83	116	13	5.3		6.3	3.29	-3	20.7	100.4	26.1	29	12.5	-3.7	0.71	26.3	59.7	64.4	27.8	7329	7.72
S2	125	S	2	LOW-IAIP	m	1327	1	1	0	18-05-2021 00:43	12	12			12H S	5.3	7.281	7.2	3.3	5.3	53.4	52.6	1.1	45.9	0.4		4.4	154	1.16	110	10	3.2		6.3	3.13	-1.3	22.5	100.4	18.2	22.6	11.7	-1.5	1.09	25.4	55.9	60.7	26.1	7373	11.65
T2	138	T	2	HIGH-CON	m	1193	0	0	1	18-05-2021 01:08	12	12			12H T	5.5	7.484	4.85	6.11	5.5	94.6	93.2	1.3	5.3	0.2		3.8	172	0.72	115	26	1.5		11.7	1.96	3.9	27.7	100.4	29.1	32.8	12.2	3.7	0.76	27.3	57.5	63.8	27.3	7454	14.29
U2	121	U	2	LOW-PLACEBO	m	741.5	0	1	0	18-05-2021 01:21	12	12			12H U	4.2	7.355	6.35	2.63	4.2	40.4	40.2	1.4	59.4	-1		3.1	171	0.77	120	2.6	3.5		3.8	3.07	1	24.6	100.4	24.9	28	9.3	0.9	0.75	26.6	58.8	62.8	20.8	7412	12.61
V2	127	V	2	LOW-PLACEBO	m	1281	0	1	0	18-05-2021 01:36	12	12			12H V	3.9	7.284	8.25	3.64	3.9	59.1	57.6	2	39.8	0.6		3.3	176	0.76	123	4.6	1.6		5.2	3.15	2.6	26.1	100.4	24.1	27.4	8.6	2.3	0.71	29.3	65.8	70	19.4	7429	10.46
X2	139	X	2	LOW-PLACEBO	m	1111	0	1	0	18-05-2021 01:54	12	12			12H X	4.4	7.419	6.25	4.43	4.4	78.7	75.9	2.9	20.6	0.6		3.3	172	0.61	118	2.8	1.3		7.6	2.67	5.8	29	100.4	23.9	27.1	9.5	5.3	0.62	30.3	65.9	71.1	21.7	7472	12.72
Y2	122	Y	2	HIGH-SE	m	1340.4	0	1	1	18-05-2021 00:29	12	12			12H Y	5.1	7.336	6.7	3.11	5.1	61.3	60.1	1.3	38	0.6		2.9	158	1.11	112	8.800000000000001	3.3		7	2.59	1	24.5	100.4	18.9	21.8	11.2	0.7	1.07	26.8	58.5	63.6	25.3	7408	12.21
Z2	116	Z	2	LOW-IAIP	f	1270	1	1	0	18-05-2021 01:14	12	12		1	12H Z	5.7	7.135	9.57	2.05	5.7	21.7	21.4	0.7	77	0.9		4.3	168	0.96	114	3.9	8.2		2.8	3.48	-5	18.9	100.4	29.9	34.2	12.5	-5.4	0.83	24.1	54.9	59	28	7304	8.970000000000001
Æ2	120	Æ	2	LOW-IAIP	m	1180.8	1	1	0	18-05-2021 00:21	12	12		1	12H AE	5.3	7.151	8.09	2.3	5.3	29.1	28.5	1.1	69.5	0.9		3.6	168	0.97	116	5.9	7.8		3.5	3.32	-7.7	17.4	100.4	30.7	34.4	11.7	-7.6	0.85	21.2	48.1	51.6	26.4	7270	10.64
Ø2	137	Ø	2	LOW-CON	f	1275	0	0	0	18-05-2021 01:04	12	12			12H OE	5.5	7.495	4.85	7.09	5.5	96.5	94.6	1.8	3.4	0.2		4.3	148	1.08	110	4.7	1.4		11.8	1.88	4.8	28.5	100.4	10.3	14.7	12.1	4.6	1.14	28.1	58.9	65.4	27.1	7465	14.29
Å2	130	Å	2	LOW-PLACEBO	m	902	0	1	0	18-05-2021 00:02	12	12			12H AA	6.1	7.457	5.39	6.06	6.1	90.7	89.5	1.2	9.2	0.1		4	177	0.59	124	3.8	0.8		12.3	2.55	4.6	28.1	100.4	24.5	28.5	13.4	4.3	0.61	28.5	59.6	66.6	30	7460	13.69
A3	150	A	3	HIGH-SE	f	725	0	1	1	26-05-2021 01:21	12	12		1	12H A	4.4	7.165	8.64	6.24	4.4	91.7	87.8	3.3	7.9	1		4.3	135	1.52	102	79	3		8.8	2.48	-5.2	20.1	100.6	10.1	14.5	9.4	-5.1	1.33	23.4	53.1	56.8	21.6	7312	10.05
ALPHA3	149	ALPHA	3	LOW-IAIP	m	847	1	1	0	26-05-2021 01:46	12	12		1	12H ALPHA	4.8	7.194	8.36	2.56	4.8	36	35	1.4	62.3	1.3		4.1	148	1.26	107	2.9	8.2		3.9	3.23	-4	20.3	100.5	17.1	21.2	10.5	-4	1.12	24.1	54.6	58.4	23.9	7330	10.36
BETA3	153	BETA	3	LOW-IAIP	m	777	1	1	0	25-05-2021 23:58	12	12			12H BETA	3.6	7.319	7.86	32.5	3.6	105.9	101.7	3.1	-5.7	0.9		4.2	146	1.3	104	4.4	0.8				4.2		100.6	12	16.2	7.7	3.9	1.24	30.3		71.9	17.7	7451	10.94
D3	145	D	3	HIGH-SE	m	949.7	0	1	1	26-05-2021 00:07	12	12		1	12H D	4.4	7.166	10.6	7.39	4.4	86	82.7	2.9	13.5	0.9		3.7	147	1.14	107	33	2.8		8.3	3.85	0.1	24.1	100.6	11.2	14.9	9.4	-0.3	1	28.7	65.2	69.7	21.6	7384	7.86
G3	164	G	3	LOW-CON	f	993	0	0	0	26-05-2021 01:06	12	12			12H G	4.8	7.495	5.04	31.3	4.8	106.1	102.2	3.1	-5.9	0.6		4.6	143	1.16	102	7.8	1.1				5.8		100.6	11.7	16.3	10.4	5.4	1.23	29.1		67.8	23.8	7476	14.11
GAMMA3	148	GAMMA	3	HIGH-SE	m	1159	0	1	1	26-05-2021 01:41	12	12		1	12H GAMMA	4.8	7.225	6.22	2.86	4.8	49.9	48.4	1.9	48.5	1.2		3.4	149	1.29	110	> 25	11.1		5.3	2.86	-8.3	17.5	100.5	19.3	22.7	10.4	-7.8	1.18	19.3	43.3	46.5	23.7	7270	12.78
H3	146	H	3	HIGH-SE	f	1104	0	1	1	26-05-2021 01:53	12	12	1		12H H THEN KILL	4.5	7.106	6.74	2.39	4.5	30.2	29.5	1.2	68.2	1.1		3.4	157	1.23	115	> 25	13.7		3	3.36	-13.6	13.6	100.5	26.4	29.8	9.8	-12.7	1.04	15.9	37	39.1	22	7171	12.19
I3	152	I	3	LOW-IAIP	f	996	1	1	0	26-05-2021 01:13	12	12		1	12H I	4.6	7.272	9.56	4.09	4.6	66.5	64.4	2.4	32.4	0.8		3.9	151	1.37	106	1.8	0.8		6.7	3.15	6.2	28.8	100.6	11.2	15.1	9.9	5.3	1.27	33.1	73.6	79	22.7	7467	9.01
J3	155	J	3	HIGH-SE	m	885	0	1	1	26-05-2021 00:30	12	12			12H J	4.2	7.184	9.53	6.08	4.2	91.8	88.1	3.1	7.9	0.9		3.6	142	1.48	104	29	3		8.5	2.4	-1.4	23.1	100.6	10.7	14.3	9.1	-1.5	1.31	26.9	61.1	65.2	20.9	7368	9.050000000000001
K3	161	K	3	HIGH-CON	f	984	0	0	1	26-05-2021 00:17	12	12			12H K	5	7.515	4.07	24.6	5	106	102	3.2	-5.8	0.6		4	153	1.05	111	40	2				1.6		100.6	16.6	20.6	10.7	1.7	1.12	24.6		57.2	24.5	7427	15.22
L3	151	L	3	LOW-IAIP	m	1175	1	1	0	26-05-2021 00:48	12	12		1	12H L	3.2	7.22	9.32	3.29	3.2	42.7	41.2	2	55.4	1.4		4.4	168	0.8	119	2.5	3.8		3.1	3.69	0.9	24.8	100.6	20	24.4	7	1	0.72	28.6	65.8	68.9	16	7407	9.279999999999999
N3	159	N	3	LOW-PLACEBO	m	1219	0	1	0	26-05-2021 01:57	12	12			12H N	3.7	7.248	9.38	5.71	3.7	86	83.6	3	13.6	-0.2		4.5	149	1.36	107	6.1	1.2		7.1	2.88	3.4	27.1	100.5	11	15.5	8.1	3.1	1.25	30.7	69.3	73.6	18.4	7437	9.199999999999999
O3	157	O	3	LOW-PLACEBO	f	849	0	1	0	26-05-2021 00:26	12	12			12H O	4.4	7.516	4.1	39	4.4	106.3	102.2	3.2	-6.1	0.7		4.4	143	1.4	106	10.2	1.2				2		100.6	12.4	16.8	9.5	2	1.49	24.9		57.9	21.8	7431	15.18
P3		P	3	LOW-CON	m	1279	0	0	0	26-05-2021 01:29	12	12			12H P	3.7	7.505	4.38	27.5	3.7	105.9	101.6	3.1	-5.7	1		4.7	161	0.96	113	4.7	2.3				2.8		100.6	21.7	26.5	8.1	2.6	1.02	25.9		60.3	18.5	7439	14.85
Q3	165	Q	3	HIGH-CON	m	676	0	0	1	26-05-2021 01:11	12	12			12H Q	3.2	7.435	5.73	31.7	3.2	106	101.8	3.2	-5.8	0.8		3.8	146	1.29	106	20.8	1.5				4.6		100.6	10.9	14.8	6.8	4.2	1.31	28.8		67.5	15.6	7460	13.34
R3	160	R	3	LOW-CON	m	637	0	0	0	26-05-2021 00:12	12	12			12H R	4.7	7.476	4.97	34.6	4.7	106.1	102	3	-5.9	0.9		4.7	141	1.39	100	6.8	1.3				3.9		100.6	12.9	17.6	10.1	3.6	1.45	27.5		64.1	23.1	7453	14.2
V3	158	V	3	LOW-PLACEBO	f	795	0	1	0	26-05-2021 01:37	12	12			12H V	4.2	7.304	8.37	3.81	4.2	64	62	2.4	34.8	0.8		3.8	157	1.06	112	4.7	1.5		6	3.05	4.8	27.8	100.6	13.7	17.5	9.2	4.2	1	31.2	69.3	74.1	21	7455	10.35
X3	162	X	3	LOW-CON	f	828	0	0	0	26-05-2021 00:38	12	12			12H X	3.6	7.56	3.77	39.7	3.6	106.3	101.9	3.1	-6	1		3.9	139	1.25	100	5.3	1.4				3.1		100.6	14.3	18.2	7.7	2.8	1.36	25.3		58.6	17.6	7443	15.56
Y3	156	Y	3	LOW-PLACEBO	f	702	0	1	0	26-05-2021 00:53	12	12			12H Y	4.5	7.299	7.81	13.8	4.5	104.7	100.6	3.2	-4.5	0.7		3.8	150	1.42	109	1.5	0.5				2.3		100.6	12.1	15.9	9.7	1.9	1.35	28.8		68.5	22.3	7424	10.98
Æ3	163	Æ	3	HIGH-CON	f	908	0	0	1	26-05-2021 00:42	12	12			12H AE	4.7	7.472	4.65	26.7	4.7	105.9	101.8	3	-5.7	0.9		3.4	153	1.09	111	18.9	1.5				1.9		100.6	16.4	19.8	10	1.8	1.13	25.5		59.5	23	7428	14.55
Ø3	154	Ø	3	LOW-IAIP	f	826	1	1	0	26-05-2021 01:32	12	12			12H OE	4.6	7.18	11.4	38.2	4.6	105.7	101.5	3	-5.5	1		4	156	1.11	110	4	0.8				3.6		100.6	13.7	17.7	9.8	2.9	0.98	32		77.6	22.5	7429	6.9
Å3		Å	3	LOW-IAIP	f	970	1	1	0	26-05-2021 00:23	12	12		1	12H AA	3.7	7.226	9.83	32	3.7	105.9	102.1	3.1	-5.7	0.5		4.1	146	1.27	104	4.3	0.6				3		100.6	11.6	15.7	8	2.7	1.16	30.6		73.6	18.3	7431	8.710000000000001
F2	119	F	2	HIGH-SE	m	1189	0	1	1	18-05-2021 02:46	13	12	1		2.45 BEFORE KILL - F	6.5	7.088	11.4	3.6	6.5	46.3	45.6	0.8	52.8	0.8		3.8	201	0.74	136	40	6.1		6.7	3.81	-4	19.4	100.4	39	42.8	14.3	-5.1	0.63	25.8	58.6	63.8	32	7301	6.9
Z2	116	Z	2	LOW-IAIP	f	1270	1	1	0	18-05-2021 02:13	13	12	1		2.10 AM BEFORE KILL- Z	5.1	7.081	12.7	3.03	5.1	34.2	33.7	0.7	64.7	0.9		4.5	158	1.26	113	6.4	4.3		3.9	3.91	-1.6	21.6	100.4	17.3	21.9	11.3	-2.4	1.06	28.3	65.7	70	25.3	7345	5.42
D3	151	D	3	HIGH-SE	m	949.7	0	1	1	26-05-2021 01:26	13	12	1		13H D BEFORE KILL	4.4	6.993	15.1	5.31	4.4	76.3	73.2	2.8	22.8	1.2		4.7	129	1.53	96	76	3		7.4	3.43	-4	20.7	100.6	5.9	10.6	9.6	-4.2	1.22	27.4	65.5	69.3	21.9	7308	2.76
Å3		Å	3	LOW-IAIP	f	970	1	1	0	26-05-2021 02:27	13	12	1		13H AA	3.8	7.079	14.5	37.1	3.8	105.6	101.3	3.1	-5.4	1		4.2	142	1.45	102	5.1	0.5				2.1		100.5	7.3	11.5	8.1	1.8	1.22	32		79.3	18.6	7407	3.48
J1		J	1	LOW-IAIP	M	1324.5	1	1	0	11/5/2021 2:35	14	12	1		14H J	3.6	6.982	9.74	2.08	3.6	27.6	26.7	1.3	70.1	1.9		6.5	140	1.39	101	3.1	16		2.2	3.12	-14.3	13.4	101.1	22.1	28.5	7.7	-13	1.11	17.3	42.1	43.7	17.6	7153	8.92
R2	118	R	2	HIGH-SE	f	1303	0	1	1	18-05-2021 02:32	14	12	1		2.30 BEFORE KILL - R	4.9	6.992	13.8	4.72	4.9	65.7	63.3	2.3	33	1.4		3.3	154	1.45	112	18.2	6		7.1	3.71	-6.3	18.6	100.4	15.9	19.2	10.6	-6.6	1.16	25.1	59.7	63.4	24.2	7268	4.14
Æ2	120	Æ	2	LOW-IAIP	m	1180.8	1	1	0	18-05-2021 03:09	15	12	1		AE BEFORE KILL	4.4	7.071	11.4	7.45	4.4	93	89	3	6.7	1.3		4.1	142	1.41	105	29	2.1		9	2.83	-5.3	20	100.4	11.9	16	9.5	-5.2	1.17	24.9	57.8	61.6	21.8	7301	6.9
ALPHA3	149	ALPHA	3	LOW-IAIP	m	847	1	1	0	26-05-2021 04:27	15	12	1		15H ALPHA BEFOREKILL	4.8	7.059	8.03	2.27	4.8	25.5	24.9	1.1	72.6	1.4		4.4	145	1.36	106	2.4	17		2.7	3.52	-13.3	13.6	100.4	22	26.4	10.6	-12.7	1.13	17	39.8	42.2	23.9	7169	10.71
GAMMA3	148	GAMMA	3	HIGH-SE	m	1159	0	1	1	26-05-2021 04:12	15	12	1		15H GAMMA	4.6	6.885	7.24	2.82	4.6	25.8	25.2	1.1	72.4	1.3		5	135	1.51	100	> 25	18		2.7	4.28	-22.9	7.9	100.5	24.7	29.7	10.1	-21.5	1.13	10.3	25.6	26.7	22.7	6955	11.61
B1		B	1	HIGH-SE	F	1222	0	1	1	11/5/2021 4:25	16	12	1		16H B 2	4.8	6.954	17.4	5.91	4.8	76.1	73.5	2.6	23.1	0.8		3.9	144	1.68	106	13.9	2.7		8	3.88	-3	21	101.1	9.6	13.5	10.4	-3.7	1.31	29	69.8	74	23.7	7308	.23
A3	150	A	3	HIGH-SE	f	725	0	1	1	26-05-2021 04:52	16	12	1		15.5H A	3.9	7.092	11.2	6.69	3.9	92.1	88	3.3	7.5	1.2		4.3	144	1.52	109	50	4.2		7.9	2.64	-4.1	21.1	100.4	9.3	13.6	8.4	-3.9	1.29	25.7	59.9	63.4	19.3	7325	7.08
I3	152	I	3	LOW-IAIP	f	996	1	1	0	26-05-2021 05:27	16	12	1		16.5H I	4.9	7.083	13.3	5.14	4.9	72.7	70.2	2.6	26.3	0.9		5.1	149	1.3	108	5.4	3.3		7.8	3.57	0	23.4	100.4	10.9	16	10.6	-0.8	1.09	29.9	69	73.9	24.2	7368	4.71
L3	151	L	3	LOW-IAIP	m	1175	1	1	0	26-05-2021 05:11	16	12	1		16,5H L BEFORE KILL	2.9	7.086	13.5	5.78	2.9	73.7	70.8	3	25.2	1		5.4	138	1.46	100	5.2	1.9		4.7	3.96	0.6	25.3	100.4	7.2	12.6	6.1	1.2	1.23	30.5	72.5	75.4	14.1	7400	4.48
O1		O	1	LOW-PLACEBO	M	1314.8	0	1	0	11/5/2021 6:06	18	22	1		18H O	4.8	6.886	26.1	14.5	4.8	101.3	97.2	3	-1.2	1		4.6	155	1.5	108	4.6	1.1		10.7	6.15	4	26.6	101	10.1	14.7	10.4	2.4	1.13	37.1	91.2	96.7	23.8	7386	.....
C1		C	1	LOW-PLACEBO	F	1065.9	0	1	0	11/5/2021 9:30	20	22	1		20H C	5.1	7.154	11.7	5.37	5.1	77.2	75.7	1.4	22.4	0.5		4.2	172	0.96	119	3.6	0.7		8.8	3.43	2	25.1	101	22.5	26.7	11.2	1.1	0.84	30.8	69.6	75.1	25.2	7402	6.71
E1	108	E	1	LOW-PLACEBO	M	1174	0	1	0	11/5/2021 9:32	20	22	1		20H E	5.2	7.263	10.2	10.8	5.2	98.7	97	1.2	1.3	0.5		4.7	144	1.34	104	4.8	1.2		11.7	3.46	7.4	30	101	5.3	10	11.6	6.1	1.24	34.4	75.4	82.4	25.9	7476	8.41
F1	105	F	1	HIGH-SE	F	1038.5	0	1	1	11/5/2021 9:16	20	22	1		20H F	3.4	6.839	9.45	5.31	3.4	66.9	64.2	2.3	31.8	1.7		7.1	166	1.21	127	49	21		5	4.1	-21.8	9.1	101	27.5	34.6	7.3	-19.8	0.88	12.1	30.8	31.9	16.8	6986	9.220000000000001
G1	106	G	1	LOW-PLACEBO	F	932.1	0	1	0	11/5/2021 9:22	20	22	1		20H G	3.8	7.001	13.9	6.11	3.8	72.1	69.3	2.6	26.8	1.3		7	122	1.32	87	37	2.3		6.1	4.34	-5.5	19.8	101	9.7	16.7	8.3	-5.2	1.06	25.7	61.8	64.9	19	7295	4.22
H1	111	H	1	HIGH-CON	M	1165	0	0	1	11/5/2021 9:39	20	22	1		20H H	4.8	7.442	6.02	6.79	4.8	100.5	96.7	3	-0.5	0.8		3.2	143	1.56	104	13.1	1		10.5	3.3	6.7	30	101	8.4	11.6	10.3	6.1	1.6	30.8	66	72.1	23.6	7483	13.1
I1	107	I	1	HIGH-SE	M	1075	0	1	1	11/5/2021 9:24	20	22	1		20H I	4.4	7.295	7.61	25.9	4.4	105.2	101.1	2.6	-5	1.3		3.7	172	1.02	124	35	1.4				1.2		101	20.3	24	9.6	0.9	0.96	27.7		66.1	22	7410	11.31
K1		K	1	LOW-CON	M	1206.8	0	0	0	11/5/2021 9:35	20	22	1		20H K	2.3	7.465	5.31	22.6	2.3	105.8	100.9	3.3	-5.5	1.3		4.6	140	1.54	101	6	1.8				4.9		101	11	15.6	4.9	4.4	1.59	28.6		66.9	11.3	7463	13.9
L1	113	L	1	HIGH-CON	F	1129	0	0	1	11/5/2021 9:43	20	22	1		20H L	5.1	7.446	5.89	33.3	5.1	101.6	100.1	0.8	-1.6	0.7		3.5	143	1.51	105	15.7	1.4		12	2.76	6.3	29.7	101	8.3	11.8	11.2	5.7	1.55	30.4	64.7	71.1	25	7479	13.25
M1	114	M	1	LOW-IAIP	F	1191	1	1	0	11/5/2021 9:46	20	22	1		20H M	4.6	7.135	13.6	16	4.6	104.3	100.3	2.9	-4.1	0.9		4.8	139	1.43	98	4.9	0.4				5.3		101	6.4	11.2	10	4.3	1.24	34.4		84.1	22.9	7443	4.51
R1	104	R	1	LOW-IAIP	F	988.2	1	1	0	11/5/2021 9:17	20	22	1		20H R	2.9	6.633	17.8	3.17	2.9	24.3	23.5	1.4	73.2	1.9		7.7	145	1.53	109	.6	20		1.6	4.94	-23.1	8.4	101	22.2	29.9	6.3	-20.3	1	14.1	40	40.7	14.3	6943	.....
S1	112	S	1	LOW-CON	F	1004	0	0	0	11/5/2021 9:40	20	22	1		20H S	5.9	7.473	5.99	18.1	5.9	100.6	99.8	0.6	-0.6	0.2		3.9	149	1.4	107	1.8	1.4		13.4	2.65	9.3	32.2	101	8.3	12.2	13	8.3	1.46	32.9	68.7	76.8	28.9	7512	13.13
B2	123	B	2	LOW-IAIP	f	1015	1	1	0	18-05-2021 08:32	21	22	1		21H B	5.3	6.983	8.86	3.15	5.3	31.9	31.1	1.4	66.4	1.1		4.8	151	1.44	109	3.1	13.3		3.8	4.23	-15.8	11.9	100.6	25.5	30.3	11.6	-15.3	1.14	15.7	37.6	39.9	26.2	7111	9.82
C2	126	C	2	LOW-IAIP	f	1210	1	1	0	18-05-2021 08:29	21	22	1		21H C	6	7.32	7.92	3.57	6	55	54.3	0.9	44.4	0.4		4.1	163	0.76	112	5.7	3.5		7.4	3.31	4.5	26.9	100.6	19.9	24	13.4	3.5	0.73	30.6	66	72.7	29.9	7446	10.88
D2	136	D	2	LOW-PLACEBO	f	1041	0	1	0	18-05-2021 09:13	21	22	1		21H D	3.5	7.313	7.2	6.51	3.5	87.5	84.2	2.9	12	0.9		4.6	205	0.51	148	5.2	0.8		6.7	3.17	1.2	25.3	100.7	30.1	34.7	7.5	1.1	0.49	27.4	61.4	65	17.3	7413	11.7
E2	133	E	2	LOW-PLACEBO	f	1260.6	0	1	0	18-05-2021 09:01	21	22	1		21H E	5.4	7.341	7.17	7.97	5.4	96	94.1	1.3	3.9	0.7		3.9	173	0.78	118	2.7	0.4		11.6	2.35	3.3	26.8	100.7	25.7	29.6	11.8	2.7	0.76	29	62.6	68.8	26.6	7436	11.73
G2	135	G	2	HIGH-CON	f	1387	0	0	1	18-05-2021 09:09	21	22	1		21H G	6.1	7.509	4.54	17.8	6.1	100.9	100.1	0.6	-0.9	0.2		3.2	148	1.35	113	13.1	2.3		13.9	2.52	4	28	100.7	8.2	11.3	13.5	4	1.43	27	56	62.9	30	7457	14.71
I2	132	I	2	HIGH-CON	m	1015.2	0	0	1	18-05-2021 08:58	21	22	1		21H I	5.5	7.51	4.64	9.5	5.5	99.6	98.2	1.1	0.4	0.3		3.8	147	1.31	108	12.9	2.4		12.4	2.49	4.8	28.6	100.7	11.6	15.4	12.2	4.6	1.39	27.8	58.1	64.6	27.3	7465	14.58
J2	128	J	2	LOW-IAIP	f	678	1	1	0	18-05-2021 08:41	21	22	1		21H J	4.2	7.335	7.27	36.9	4.2	105.7	101.6	2.9	-5.5	1		4.6	162	0.95	112	3.2	0.4				3.2		100.6	20.5	25.1	9	2.9	0.92	29.1		68.9	20.6	7438	11.61
K2	141	K	2	LOW-PLACEBO	m	1405	0	1	0	18-05-2021 09:34	21	22	1		21H K	5.1	7.194	10.5	4.26	5.1	56.7	55.5	1.1	42.4	1		4.1	190	0.55	130	4.2	1.6		6.4	3.85	2.1	25	100.7	29.7	33.8	11.1	1.3	0.49	30.2	67.9	73.2	25.1	7408	8.01
L2	131	L	2	LOW-CON	m	1202.8	0	0	0	18-05-2021 08:52	21	22	1		21H L	5.7	7.523	4.4	10.5	5.7	99.8	98.8	0.8	0.2	0.2		4.8	188	0.64	129	11.7	0.9		12.9	2.49	4.3	28.3	100.7	31	35.8	12.7	4.3	0.69	27.1	56.5	63	28.2	7461	14.86
M2	140	M	2	LOW-IAIP	m	1261	1	1	0	18-05-2021 09:30	21	22	1		21H M	5.6	7.114	12	10.9	5.6	96.5	94.4	1.2	3.4	1		4.3	186	0.53	128	6.7	0.5		12.1	3.28	-0.5	23.1	100.7	28.3	32.6	12.2	-1.5	0.46	29	65.4	71.1	27.5	7361	6.24
O2	134	O	2	LOW-CON	m	1031	0	0	0	18-05-2021 09:04	21	22	1		21H O	4.7	7.528	4.29	8.85	4.7	103.3	99.7	3.1	-3.2	0.4		3.8	191	0.63	139	4.9	0.8				4		100.7	25.3	29.1	10.1	3.8	0.68	26.7		62.1	23.2	7456	14.98
P2	129	P	2	LOW-IAIP	f	1098.7	1	1	0	18-05-2021 08:47	21	22	1		21H P	6.3	7.051	15	8.28	6.3	91	89.5	1.1	8.8	0.6		4.4	167	0.77	117	8	0.5		12.9	3.62	0.8	23.3	100.7	18.8	23.2	14	-1.2	0.63	31.2	71	77.7	31.3	7355	2.86
Q2	124	Q	2	HIGH-SE	f	793.5	0	1	1	18-05-2021 08:24	21	22	1		21H Q	4.4	7.099	11.6	11.3	4.4	102.7	98	3.1	-2.6	1.5		2.9	167	1.03	121	10.6	3				-2.9		100.6	19.6	22.5	9.4	-3	0.87	26.8		66	21.8	7338	6.78
S2	125	S	2	LOW-IAIP	m	1327	1	1	0	18-05-2021 08:27	21	22	1		21H S	4.9	7.249	8.62	3.86	4.9	55.8	54.1	2	42.9	1		4.4	168	0.85	122	3.8	2		6	3.53	1	24.3	100.6	18.4	22.8	10.7	0.5	0.78	28.2	62.9	67.7	24.2	7401	10.09
T2	138	T	2	HIGH-CON	m	1193	0	0	1	18-05-2021 09:20	21	22	1		21H T	2.4	7.315	3.3	15.7	2.4	105	99.6	3.2	-4.7	1.9		3.2	190	0.74	134	30	12.6				-13.6		100.7	43.6	46.8	5	-12.6	0.71	12.6		29.9	11.6	7169	16.11
V2	127	V	2	LOW-PLACEBO	m	1281	0	1	0	18-05-2021 08:38	21	22	1		21H V	4	7.225	10.3	5.61	4	81.8	78.9	2.6	17.5	1		3.9	163	0.9	116	4.7	0.8		7.2	3.21	4.5	27.8	100.6	14.5	18.4	8.6	4	0.81	32.1	72.6	77.3	19.7	7447	8.140000000000001
X2	139	X	2	LOW-PLACEBO	m	1111	0	1	0	18-05-2021 09:25	21	22	1		21H X	4.4	7.244	7.34	3.93	4.4	57.2	55.2	2	41.3	1.5		3.8	178	0.87	118	3.9	7.6		5.5	3.52	-3.5	21.1	100.7	36.5	40.4	9.5	-3.4	0.8	23.8	53.4	57.1	21.6	7343	11.55
Y2	122	Y	2	HIGH-SE	m	1340.4	0	1	1	18-05-2021 05:51	21	22	1		Y 5.45	5	6.946	10.7	4.49	5	69	66.9	2.3	30.1	0.7		6.2	168	0.71	117	133	3.1		7.6	3.32	-14.7	13	100.5	33.3	39.5	10.9	-14.3	0.55	17.4	42	44.5	24.7	7125	7.74
Ø2	137	Ø	2	LOW-CON	f	1275	0	0	0	18-05-2021 11:36	21	22			21H OE	5.3	7.402	6	3.62	5.3	70.6	68.7	2.1	28.6	0.6		3.9	142	1.44	108	3.9	1.4		8.2	2.56	3.2	26.6	100.7	6.4	10.4	11.5	2.9	1.44	28	60.2	65.8	26	7440	13.06
Å2	130	Å	2	LOW-PLACEBO	m	902	0	1	0	18-05-2021 08:43	21	22	1		21H AA	5.6	7.431	5.87	24.7	5.6	101	100.1	0.6	-1	0.3		4.4	161	0.87	112	3.9	0.5		12.9	2.78	4.9	28.5	100.7	19.4	23.8	12.3	4.4	0.89	29.2	61.9	68.6	27.5	7462	13.2
BETA3	153	BETA	3	LOW-IAIP	m	777	1	1	0	26-05-2021 08:26	21	22	1		21H BETA	3.7	7.298	8.33	4.02	3.7	68.7	66.4	2.7	30.2	0.7		4.7	152	1.08	109	4.2	1.8		5.6	2.97	4.1	27.5	100.5	12.3	17	8	3.8	1.02	30.6	68.6	72.8	18.2	7448	10.38
G3	164	G	3	LOW-CON	f	993	0	0	0	26-05-2021 09:10	21	22	1		21H G	4.7	7.517	4.44	9.32	4.7	104.2	100.7	3.3	-4.1	0.1		4.8	210	0.65	150	8.300000000000001	1				4.1		100.5	33.7	38.5	10.2	3.9	0.7	27		62.8	23.3	7457	14.77
J3	155	J	3	HIGH-SE	m	885	0	1	1	26-05-2021 08:32	21	22	1		21H J	3.4	7.155	7	3.13	3.4	54.2	52.4	2.4	44.2	1		4.3	169	0.86	124	> 25	8.7		4	2.92	-10.3	16.4	100.5	26.5	30.8	7.3	-9.3	0.75	18.5	43	45.1	16.7	7238	11.88
K3	161	K	3	HIGH-CON	f	984	0	0	1	26-05-2021 09:00	21	22	1		21H K	4.8	7.57	3.34	14.4	4.8	105.5	101.2	3.3	-5.3	0.8		3.4	164	0.95	117	31	2.6				0.9		100.5	24.2	27.6	10.3	1.2	1.04	23		53.2	23.7	7420	16.01
N3	159	N	3	LOW-PLACEBO	m	1219	0	1	0	26-05-2021 08:46	21	22	1		21H N	4.6	7.178	10.5	3.89	4.6	53.9	52.1	2.4	44.6	0.9		4.8	144	1.46	104	5	5.3		5.4	3.67	0.9	24.2	100.5	10.9	15.7	9.9	0.4	1.29	29.3	66.6	71	22.6	7395	7.91
O3	157	O	3	LOW-PLACEBO	f	849	0	1	0	26-05-2021 08:35	21	22	1		21H O	4.2	7.517	4.33	12.3	4.2	105.2	101.1	3.4	-5	0.5		4.1	155	1.22	116	4.4	0.9				3.4		100.5	13.3	17.4	9	3.2	1.3	26.3		61.2	20.7	7448	14.89
Q3	165	Q	3	HIGH-CON	m	676	0	0	1	26-05-2021 09:11	21	22	1		21H Q	2.9	7.455	5.15	12.9	2.9	105.2	100.4	3.6	-5	1		3.3	151	1.19	111	35	2.1				3.2		100.5	12.4	15.7	6.1	2.9	1.23	27.1		63.4	14.1	7443	13.98
R3	160	R	3	LOW-CON	m	637	0	0	0	26-05-2021 08:51	21	22	1		21H R	4.4	7.529	4.2	11.7	4.4	104.9	100.7	3.2	-4.7	0.8		5.1	145	1.36	105	4.4	1.5				3.5		100.5	14.1	19.2	9.5	3.4	1.46	26.3		61	21.8	7450	15.04
V3	158	V	3	LOW-PLACEBO	f	795	0	1	0	26-05-2021 08:43	21	22	1		21H V	4.2	7.202	10.2	4.21	4.2	62.5	60.9	2.2	36.5	0.4		4.7	140	1.42	99	9.5	4.3		5.8	3.47	2	25.5	100.5	11.2	15.9	9.1	1.6	1.27	30	68.2	72.6	20.7	7414	8.26
X3	162	X	3	LOW-CON	f	828	0	0	0	26-05-2021 09:02	21	22	1		21H X	3.6	7.584	3.44	7.21	3.6	102.9	98.4	3.5	-2.8	0.9		4.4	149	1.07	106	6.1	1.6				2.6		100.5	18.9	23.3	7.6	2.3	1.19	24.4		56.5	17.5	7437	15.9
Y3	156	Y	3	LOW-PLACEBO	f	702	0	1	0	26-05-2021 08:39	21	22	1		21H Y	3.5	6.992	10.9	7.99	3.5	91.9	88.2	3.2	7.8	0.8		7.7	161	0.78	115	53	1.7		7.2	3.29	-11.6	15.8	100.5	26.2	33.9	7.6	-10.6	0.62	19.8	47.7	50	17.5	7202	7.46
Æ3	163	Æ	3	HIGH-CON	f	908	0	0	1	26-05-2021 09:06	21	22	1		21H AE	4.4	7.439	4.99	9.68	4.4	104.2	99.7	3.4	-4	0.9		3.5	170	0.82	125	23.1	1.6				1.1		100.5	20.2	23.7	9.4	1.1	0.84	25.3		59.3	21.6	7417	14.16
Ø3	154	Ø	3	LOW-IAIP	f	826	1	1	0	26-05-2021 08:30	21	22	1		21H OE	4.2	7.193	9.73	3.44	4.2	53.4	52	2	45.3	0.7		4.7	174	0.81	116	4.5	4.1		4.9	3.26	-0.1	23.7	100.5	30.3	35	9.1	-0.3	0.72	28.1	64	67.9	20.6	7387	8.800000000000001
[truncated: 7 more columns]

## Sheet: Hematology
ID	Litter	Letter	Group	Sex	Birthweight	Time	Leu	RBC	Hemoglobin	Hematocrit	MCH	MCHC	Platelets	MPV	MCV	MPC	Neu%	Lymph%	Mono%	EOS%	Baso%	LUC%	Neu_n	Lymph_n	Mono_n	EOS_n	Bas_n	LUC_n	Reticulocyte%	Reticulocytes_n
A1	1	A	Low IAIP	M	803	3
B1	1	B	High	F	1222	3	2.19	4.57	6.5	0.348	1.42	18.69	371	9.8	76.1	215	45.6	51.5	0.6	2.2	0.1	0	1	1.13	0.01	0.05	0	0	6.3	287.8
C1	1	C	Low	F	1065.9	3	2.05	4.28	6.2	0.325	1.47	19.17	331	10.4	75.8	224	35.8	61.6	0.4	2.1	0.1	0	0.74	1.26	0.01	0.04	0	0	8.1	344.8
D1	1	D	Low	F	1224	3
E1	1	E	Low	M	1174	3	3.96	4.58	6.7	0.368	1.45	18.08	369	11	80.4	226	42.3	56.4	0.2	0.9	0.01	0	1.68	2.24	0.01	0.04	0	0	6.4	293.6
F1	1	F	High	F	1038.5	3	1.84	3.89	5.7	0.308	1.46	18.46	225	11.1	79.1	225	33.9	56.3	0.9	9	0	0	0.62	1.04	0.02	0.17	0	0	6.4	249.6
G1	1	G	Low	F	932.1	3	2.31	4.9	6.8	0.355	1.38	19.05	361	11.4	72.4	218	27.7	69.8	0.6	1.7	0.3	0	0.64	1.61	0.01	0.04	0.01	0	5.9	288.8
H1	1	H	High CON	M	1165	3	2.43	4.05	6.1	0.299	1.51	20.51	218	12.6	73.9	178	25.8	67.7	1.3	5.2	0.1	0	0.63	1.64	0.03	1.13	0	0	3.6	145.2
I1	1	I	High	M	1075	3	1.19	4.87	7	0.383	1.44	18.4	228	12	78.5	223	57.3	24.3	0.4	17.6	0.4	0	0.68	0.29	0	0.21	0.01	0	5.6	275.4
J1	1	J	Low IAIP	M	1324.5	3	2.61	3.26	5	0.257	1.54	19.45	253	10.6	78.9	212	65.4	32.1	0.3	2.1	0	0	1.71	0.84	0.01	0.05	0	0	8.4	274
K1	1	K	Low CON	M	1206.8	3	2.62	4.31	6	0.312	1.38	19.1	336	10.3	72.3	224	18.3	75.1	0.7	5.9	0.1	0	0.48	1.97	0.02	0.15	0	0	5.9	255.3
L1	1	L	High CON	F	1129	3	2.56	4.57	6.7	0.362	1.47	18.49	454	9.7	79.4	214	38.6	58.6	0.7	2.1	0	0	0.99	1.5	0.02	0.05	0	0	6.9	314.6
M1	1	M	Low IAIP	F	1191	3	1.37	4.94	6.5	0.338	1.31	19.2	301	10.2	68.4	219	32.8	64.5	0.1	2.6	0	0	0.45	0.88	0	0.04	0	0	6.5	321.7
N1	1	N	High	M	1468	3	0.81	3.45	5	0.268	1.46	18.8	242	10.5	77.5	222	19	75	0	5.5	0.5	0	0.15	0.61	0	0.05	0	0	7	242.2
O1	1	O	Low	M	1314.8	3	2.6	4.64	6.8	0.335	1.48	20.44	302	11	72.2	230	46.3	48.7	0.9	4	0.1	0	1.2	1.26	0.02	0.1	0	0	0.6	277.3
P1	1	P	Low IAIP	M	981	3	2.49	4.68	6.9	0.372	1.48	18.6	343	11.5	79.6	211	43.4	54.5	0.5	1.4	0.1	0.1	1.08	1.35	0.01	0.04	0	0	8.78	407.2
R1	1	R	Low IAIP	F	988.2	3	2.9	2.76	4.3	0.212	1.56	20.27	311	10.9	76.8	208	60.1	35.6	0.4	3.8	0	0	1.75	1.03	0.01	0.11	0	0	6.4	176
S1	1	S	Low CON	F	1004	3	2.88	4.32	7.3	0.375	1.68	19.4	343	10.3	86.8	222	26.8	71.1	0.6	1.5	0	0	0.77	2.04	0.02	0.04	0	0	6.1	262.7
A2	2	A	Low IAIP	M	1210	3	1.72	4.02	6.2	0.333	1.55	18.77	392	9.9	82.7	205	40.9	56.3	0.4	2.5	0	0	0.7	0.97	0.01	0.04	0	0	8.7	350.9
B2	2	B	Low IAIP	F	1015	3	3.51	5.24	7.1	0.391	1.36	18.18	371	11.6	74.7	218	60.8	38.1	0.2	0.7	0.1	0	2.14	1.34	0.01	0.03	0	0	7.6	400.5
C2	2	C	Low IAIP	F	1210	3
D2	2	D	Low	F	1041	3	3.73	3.11	4.3	0.229	1.4	18.97	271	11.6	73.7	202	56.9	41.8	0	1.1	0.1	0	2.12	1.56	0	0.04	0.01	0	7.6	236.2
E2	2	E	Low	F	1260.6	3	3.29	5.3	7.9	0.413	1.48	19.04	401	10.4	77.8	223	42.2	56.4	0.2	1	0.1	0	1.39	1.86	0.01	0.03	0	0	7.4	391.8
F2	2	F	High	M	1189	3	1.74	4.57	6.3	0.364	1.39	17.41	308	12.7	79.8	218	52.3	46	0.3	1.2	0.2	0	0.91	0.8	0	0.02	0	0	6	275.4
G2	2	G	High CON	F	1387	3	3.3	5.09	7	0.393	1.38	17.86	389	10.5	77.2	217	33.6	64.8	0.6	0.8	0.1	0	1.11	2.14	0.02	0.03	0	0	6.3	321.6
H2	2	H	High	M	1243	3
I2	2	I	High CON	M	1015.2	3	2.2	4.8	6.5	0.359	1.35	18.08	377	10.6	74.8	209	30	68.6	0.8	0.3	0.3	0	0.66	1.51	0.02	0.01	0.01	0	6.7	323.9
J2	2	J	Low IAIP	F	678	3	2.19	5.02	7	0.396	1.39	17.67	325	11.1	78.9	209	53.7	44.2	0.2	1.7	0.2	0	1.18	0.97	0	0.04	0.01	0	7.3	366.5
K2	2	K	Low	M	1405	3	2.7	4.45	6.5	0.346	1.46	18.84	375	10.3	77.7	216	40.6	58.2	0.3	0.7	0.1	0	1.1	1.57	0.01	0.02	0	0	7.8	346.7
L2	2	L	Low CON	M	1202.8	3	3.46	4.73	7.4	0.388	1.57	19.15	423	9.6	82	223	26.8	71.3	0.6	1.1	0.1	0	0.93	2.46	0.02	0.04	0	0	6.9	325.6
M2	2	M	Low IAIP	M	1261	3	3.73	4.78	6.9	0.36	1.44	19.09	254	11	75.3	224	36.7	60.7	0.5	1.9	0.1	0	1.37	2.27	0.02	0.07	0	0	5.5	265.2
N2	2	N	High	M	791	3	0.91	4.29	6.7	0.363	1.56	18.38	360	11.1	84.7	216	24.9	72.1	0.4	2.3	0.1	0.1	0.23	0.66	0	0.02	0	0	9.7	414.8
O2	2	O	Low CON	M	1031	3	3.3	4.46	6.3	0.332	1.41	18.93	419	10.3	74.4	217	23.1	75.9	0.2	0.7	0.1	0	0.76	2.5	0.01	0.02	0	0	7.4	331.6
P2	2	P	Low IAIP	F	1098.7	3	3.67	4.72	6.7	0.369	1.43	18.27	371	10.9	78.3	214	46.4	52.1	0.2	1.2	0	0	1.7	1.91	0.01	0.04	0	0	6.3	295.7
Q2	2	Q	High	F	793.5	3	2.75	4.4	5.8	0.321	1.33	18.22	355	11.5	72.9	215	58.6	39.6	0.4	1.3	0.2	0	1.61	1.09	0.01	0.04	0.01	0	6.7	293
R2	2	R	High	F	1303	3	1.99	4.7	6.8	0.368	1.45	18.59	374	10.1	78.2	222	40.3	56.2	0.2	3.3	0.1	0	0.8	1.12	0	0.07	0	0	7.1	334.3
S2	2	S	Low IAIP	M	1327	3	3.49	4.28	6.6	0.344	1.54	19.11	349	10.6	80.4	212	47.6	50.5	0.3	1.5	0	0.1	1.66	1.77	0.01	0.05	0	0	7.5	318.8
T2	2	T	High CON	M	1193	3	1.99	4.85	6.3	0.351	1.3	18.04	346	11.7	72.3	215	41.4	57.7	0.6	0.3	0.1	0	0.82	1.15	0.01	0.01	0	0	6.7	323.9
U2	2	U	Low	M	741.5	3	3.16	4.26	6	0.322	1.42	18.69	373	11	75.7	220	47.6	50.6	0.3	1.4	0	0	1.51	1.6	0.01	0.04	0	0	7.5	319.6
V2	2	V	Low	M	1281	3	4.68	3.79	5.1	0.283	1.35	18.11	306	11.7	74.6	207	56.3	42.1	0.2	1.2	0	0	2.64	1.97	0.01	0.06	0	0	6.3	238.6
X2	2	X	Low	M	1111	3	1.95	4.21	5.6	0.304	1.34	18.48	334	12.6	72.3	212	46.5	51.9	0.1	1.4	0.1	0.1	0.91	1.01	0	0.03	0	0	6.5	273.7
Y2	2	Y	High	M	1340.4	3	3.23	4.68	6.4	0.358	1.36	17.79	321	10.5	76.6	222	55.7	40.9	0.3	2.8	0.2	0.1	1.8	1.32	0.01	0.09	0.01	0	6.7	312.8
Z2	2	Z	Low IAIP	F	1270	3	2.71	4.08	6	0.325	1.46	18.36	318	11.3	79.6	209	56.8	40.7	0.3	1.9	0.2	0.1	1.54	1.1	0.01	0.05	0.01	0	6.3	256.4
Æ2	2	Æ	Low IAIP	M	1180.8	3	2.06	4.6	6.7	0.359	1.46	18.68	442	9.2	78.1	215	34	64.6	0.2	1.1	0.1	0	0.7	1.33	0	0.02	0	0	7.1	325.9
Ø2	2	Ø	Low CON	F	1275	3	4.17	5.02	7.5	0.393	1.5	19.19	327	10.9	78.3	220	22.5	75.8	0.9	0.6	0.2	0	0.94	3.16	0.04	0.03	0.01	0	6.9	344.6
Å2	2	Å	Low	M	902	3	4.16	5.97	8.1	0.449	1.36	18.08	325	11.3	75.2	220	55.4	43.6	0.3	0.5	0.2	0	2.3	1.81	0.01	0.02	0.01	0	6.2	371.9
A3	3	A	High	F	725	3	1.62	4.03	6.2	0.364	1.53	16.92	304	11.9	90.5	219	22.4	76.6	0.4	0.4	0.1	0.1	0.36	1.24	0.01	0.01	0	0	7.5	301.7
ALPHA3	3	ALPHA	Low IAIP	M	847	3	2	3.61	5.8	0.324	1.62	18.04	340	10.8	89.7	212	27.1	71.1	0.3	1.1	0.3	0.1	0.54	1.42	0.01	0.02	0.01	0	6.4	230.7
B3	3	B	High	F	794	3	1.18	3.8	6	0.338	1.57	17.66	296	11.5	88.9	217	9.7	88.1	0.8	0.8	0.5	0	0.11	1.04	0.01	0.01	0.01	0	7.2	274.2
BETA3	3	BETA	Low IAIP	M	777	3	2.59	4.23	5.9	0.322	1.39	18.32	359	10.6	76.1	219	25.1	72.1	0.1	2.7	0	0	0.65	1.87	0	0.07	0	0	7.8	328.9
D3	3	D	High	M	949.7	3	1.78	3.95	5.7	0.332	1.44	17.16	356	10.8	84	216	49.9	48.3	0.1	1.6	0	0	0.89	0.86	0	0.03	0	0	5.7	224.8
G3	3	G	Low CON	F	993	3	3	4.03	5.9	0.312	1.46	18.87	417	10.2	77.4	220	36.8	61.1	1	1.1	0.1	0	1.1	1.83	0.03	0.03	0	0	6.9	278.8
GAMMA3	3	GAMMA	High	M	1159	3	1.51	3.74	5.8	0.316	1.56	18.41	447	10.1	84.5	209	22.5	75.2	0.5	1.5	0.2	0	0.34	1.13	0.01	0.02	0	0	8.1	303.6
H3	3	H	High	F	1104	3	1.58	3.39	5.2	0.3	1.54	17.42	328	11.4	88.5	221	28.6	70	0.1	1.1	0.2	0	0.45	1.11	0	0.02	0	0	6.6	225
I3	3	I	Low IAIP	F	996	3	3.85	4.48	6.2	0.341	1.38	18.2	365	10.2	76.1	223	44.8	54	0.4	0.7	0.1	0	1.72	2.08	0.02	0.03	0	0	7.3	325.7
J3	3	J	High	M	885	3	2	3.83	5.5	0.312	1.44	17.65	340	10.5	81.4	219	50.9	47.8	0.1	1.1	0.1	0	1.02	0.96	0	0.02	0	0	8.3	317.6
K3	3	K	High CON	F	984	3	3.14	3.98	5.5	0.325	1.39	17.02	341	12	81.7	230	36.6	61.7	0.5	0.9	0.2	0	1.15	1.94	0.02	0.03	0.01	0	6	240.5
L3	3	L	Low IAIP	M	1175	3	1.29	2.75	4.7	0.244	1.72	19.32	334	10.6	88.8	220	20.7	77	0.6	1.2	0.5	0	0.27	0.99	0.01	0.02	0.01	0	10.1	277.4
N3	3	N	Low	M	1219	3	3.15	3.72	5.3	0.298	1.43	17.86	354	10.8	80.1	216	48.3	49.1	0.4	2.1	0.1	0	1.52	1.54	0.01	0.07	0	0	8.2	304.6
O3	3	O	Low	F	849	3	2.51	4.19	6.1	0.338	1.45	18.02	486	11.3	80.7	229	44.4	53.1	0.8	1.7	0.1	0	1.13	1.35	0.02	0.04	0	0	8.8	366.8
P3	3	P	Low CON	M	1279	3	2.88	3.27	4.6	0.249	1.4	18.31	393	10.2	76.2	215	30.7	66.9	0.7	1.5	0.1	0	0.89	1.93	0.02	0.04	0	0	7.5	245.2
Q3	3	Q	High CON	M	676	3	2.2	2.49	4	0.222	1.61	18.04	303	11.4	89	207	25.1	72.6	1	1	0.4	0	0.55	1.6	0.02	0.02	0.01	0	8.5	212.5
R3	3	R	Low CON	M	637	3	2.5	3.76	5.6	0.304	1.49	18.38	337	11	80.9	223	32.3	66.2	0.8	0.7	0.1	0	0.81	1.66	0.02	0.02	0	0	9.3	350.3
T3	3	T	Low	M	1017	3	2.09	4.08	5.6	0.299	1.38	18.85	353	10.7	73.3	221	39.5	59.4	0.1	1	0.1	0	0.83	1.24	0	0.02	0	0	9	368.6
U3	3	U	Low	F	909	3	2.38	4.11	6.2	0.333	1.5	18.55	438	10.6	81	227	19.6	78.7	0.3	0.9	0.3	0.1	0.47	1.88	0.01	0.02	0.01	0	8	327.6
V3	3	V	Low	F	795	3	2.34	3.94	5.8	0.312	1.47	18.55	341	11.1	79.1	215	30.1	68.6	0.3	1	0	0	0.7	1.61	0.01	0.02	0	0	7	275.7
X3	3	X	Low CON	F	828	3	4.48	3.1	5	0.268	1.61	18.67	335	11.1	86.3	210	49.4	47.4	1.6	0.8	0.7	0.1	2.21	2.12	0.07	0.04	0.03	0.01	6.2	191.1
Y3	3	Y	Low	F	702	3	2.94	4.44	6.7	0.364	1.5	18.34	409	11	82	224	51.6	46.2	0.2	1.7	0.2	0	1.52	1.36	0.01	0.05	0.01	0	5.9	263.3
Æ3	3	Æ	High CON	F	908	3	2.27	3.67	5.6	0.313	1.51	17.75	336	10.3	85.3	219	20.7	76.7	1	1.3	0.2	0	0.47	1.74	0.02	0.03	0.01	0	7	255.3
ø3	3	ø	Low IAIP	F	826	3	1.9	4.33	6.3	0.351	1.46	18.02	343	11.6	81.1	224	37.3	60.4	0.7	0.9	0.6	0	0.71	1.15	0.01	0.02	0.01	0	8.7	376.2
Å3	3	Å	Low IAIP	F	970	3	3.56	3.6	5.2	0.285	1.44	18.23	298	11.8	79.2	224	60.4	36.9	0.3	2.2	0.1	0.1	2.15	1.31	0.01	0.08	0	0	7.4	265.5
A1	1	A	Low IAIP	M	803	6
B1	1	B	High	F	1222	6	0.87	4.13	5.7	0.315	1.39	18.28	377	10.3	76.2	211	36.2	60.4	0.1	3.2	0	0	0.32	0.53	0	0.03	0	0	6.4	264.1
C1	1	C	Low	F	1065.9	6	0.63	4.06	5.9	0.308	1.47	19.33	355	10.3	75.8	219	25.6	70.7	0.2	3.4	0	0	0.16	0.45	0	0.02	0	0	7.9	320.1
D1	1	D	Low	F	1224	6
E1	1	E	Low	M	1174	6	2.49	4.12	6	0.331	1.46	18.15	347	11.1	80.3	224	64.1	33.8	0.4	1.7	0.1	0	1.59	0.84	0.01	0.04	0	0	6.2	255.3
F1	1	F	High	F	1038.5	6	0.87	3.78	5.7	0.299	1.5	18.91	280	11	79.1	224	32	62.3	0.6	5.2	0	0	0.28	0.54	0	0.04	0	0	6.6	251.2
G1	1	G	Low	F	932.1	6	0.68	3.96	5.4	0.286	1.37	19.01	328	11.2	72.2	216	9.9	85.4	0.7	3.8	0.2	0	0.07	0.58	0	0.03	0	0	6.2	246.5
H1	1	H	High CON	M	1165	6	2.11	3.93	5.5	0.311	1.41	17.78	297	10.6	79.2	212	51.9	46.5	0.5	0.9	0.1	0	1.1	0.98	0.01	0.02	0	0	5.6	219.6
I1	1	I	High	M	1075	6	0.37	4.25	6.1	0.341	1.45	17.99	283	11.2	80.3	223	44.8	47	0.4	7.1	0.7	0	0.17	0.17	0	0.03	0	0	5	210.9
J1	1	J	Low IAIP	M	1324.5	6	1.23	2.72	4.2	0.213	1.55	19.8	226	10.7	78.2	212	25.9	70.2	0.2	3.7	0	0	0.32	0.86	0	0.05	0	0	7.9	214.8
K1	1	K	Low CON	M	1206.8	6	2.11	4.25	5.9	0.315	1.38	18.63	348	11.9	74.2	221	42.5	55.4	0.9	1.2	0	0	0.9	1.17	0.02	0.02	0	0	6.6	282.1
L1	1	L	High CON	F	1129	6	2.24	4.16	6.1	0.333	1.46	18.25	471	9.8	80	216	50	47.6	0.9	1.4	0.2	0	1.12	1.06	0.02	0.03	0	0	7.1	294.5
M1	1	M	Low IAIP	F	1191	6	0.51	4.4	5.8	0.308	1.33	18.96	278	11.4	70.1	214	8.9	86.6	0.5	3.8	0.3	0	0.05	0.44	0	0.02	0	0	7	310.2
N1	1	N	High	M	1468	6	0.27	3.26	4.7	0.254	1.45	18.57	190	11.4	77.9	222	9	87	1.3	2.7	0	0	0.02	0.24	0	0.01	0	0	7.5	245.2
O1	1	O	Low	M	1314.8	6	1.72	4.29	6	0.305	1.4	19.7	289	11.1	71.2	230	67.2	28.9	0.1	3.8	0.1	0	1.15	0.5	0	0.06	0	0	5.9	252.7
P1	1	P	Low IAIP	M	981	6	2.17	4.31	6.6	0.357	1.53	18.41	318	12.6	82.9	200	6.7	89.6	0.5	0.7	2.4	0.1	0.15	1.94	0.01	0.02	0.05	0	7.6	328
R1	1	R	Low IAIP	F	988.2	6	1.19	2.47	3.8	0.195	1.54	19.55	256	11.1	78.6	203	37.9	55.1	0.3	6.7	0	0	0.45	0.65	0	0.08	0	0	5.3	130.9
S1	1	S	Low CON	F	1004	6	2.21	3.97	6.7	0.349	1.68	19.1	326	10.6	87.9	219	39.6	57.7	0.8	1.9	0	0	0.88	1.28	0.02	0.04	0	0	6	239.6
A2	2	A	Low IAIP	M	1210	6	0.95	3.98	6.3	0.328	1.57	19.08	325	10.2	82.3	205	20.8	64.1	7.2	7.8	0.1	0	0.2	0.61	0.07	0.07	0	0	7.7	307
B2	2	B	Low IAIP	F	1015	6	1.89	4.58	6.2	0.336	1.36	18.55	303	12.5	73.2	213	54.5	43.7	0.3	1.4	0	0.1	1.03	0.83	0.01	0.03	0	0	6.8	311.7
C2	2	C	Low IAIP	F	1210	6	3.05	5.44	7.2	0.395	1.32	18.17	318	12.2	72.6	206	54.6	41.9	0.1	3.4	0	0	1.67	1.28	0	0.1	0	0	4.3	231.7
D2	2	D	Low	F	1041	6	1.63	2.97	4.1	0.218	1.38	18.77	190	12.6	73.5	202	46.6	49.3	0.4	3.5	0.2	0	0.76	0.8	0.01	0.06	0	0	7.2	212.5
E2	2	E	Low	F	1260.6	6	1.83	4.99	7.1	0.391	1.43	18.24	363	10.8	78.3	224	55.5	42.2	0.1	2.2	0	0	1.01	0.77	0	0.04	0	0	7.1	355.9
F2	2	F	High	M	1189	6	0.44	4.77	6.5	0.372	1.36	17.42	275	13	77.9	223	29.9	66.1	0.9	2.5	0.6	0	0.13	0.29	0	0.01	0	0	4.7	226.2
G2	2	G	High CON	F	1387	6	2.57	5.01	6.9	0.399	1.37	17.26	296	11.7	79.6	223	40.3	57.4	1	1.3	0	0.1	1.04	1.47	0.03	0.03	0	0	5.7	286.3
H2	2	H	High	M	1243	6	0.48	4.94	6.5	0.349	1.31	18.64	231	11.6	70.5	212	13.2	79.9	0.5	6.1	0.3	0	0.06	0.39	0	0.03	0	0	6.1	302.7
I2	2	I	High CON	M	1015.2	6	2.78	4.78	6.4	0.36	1.34	17.8	375	11.1	75.4	212	32	66.1	0.9	1	0.1	0	0.89	1.84	0.02	0.03	0	0	6.3	302.5
J2	2	J	Low IAIP	F	678	6	1.64	4.54	6.4	0.345	1.41	18.63	301	11.2	75.9	211	63.3	34.3	0.2	2.1	0.2	0	1.04	0.56	0	0.03	0	0	6.9	312.2
K2	2	K	Low	M	1405	6	1.4	4.22	6.1	0.327	1.44	18.58	324	10.6	77.6	217	44.5	53.3	0.2	1.9	0.2	0	0.62	0.75	0	0.03	0	0	7	294.3
L2	2	L	Low CON	M	1202.8	6	2.87	4.69	7.2	0.384	1.54	18.78	390	10.5	81.9	223	35.7	62.8	0.3	0.7	0.1	0.3	1.03	1.8	0.01	0.02	0	0.01	6.4	302.2
M2	2	M	Low IAIP	M	1261	6	2.31	4.46	6.4	0.339	1.43	18.8	288	12.1	76	226	46.8	51.4	0.3	1.4	0.1	0	1.08	1.19	0.01	0.03	0	0	5.4	240.4
N2	2	N	High	M	791	6	0.24	4.11	6.4	0.346	1.55	18.39	210	12	84.3	215	53.9	16.6	1.6	27.4	0.5	0	0.13	0.04	0	0.07	0	0	9.3	383.5
O2	2	O	Low CON	M	1031	6	3.11	4.19	5.9	0.308	1.4	19.1	425	10.9	73.4	211	36.1	61.4	0.1	2.3	0	0	1.12	1.91	0	0.07	0	0	7	293.7
P2	2	P	Low IAIP	F	1098.7	6	2.34	4.35	6.4	0.338	1.46	18.84	362	11	77.6	211	54.4	43.1	0.4	2.1	0.2	0	1.27	1.01	0.01	0.05	0	0	5.7	247.4
Q2	2	Q	High	F	793.5	6	1.52	4.56	5.8	0.323	1.27	17.91	247	11.7	71	222	61.4	36.6	0.1	1.8	0.1	0.1	0.93	0.56	0	0.03	0	0	6.2
R2	2	R	High	F	1303	6	0.54	4.54	6.6	0.351	1.46	18.89	282	10.3	77.3	218	11.6	71.4	2.5	14.3	0.2	0	0.06	0.39	0.01	0.08	0	0	6.3	287.1
S2	2	S	Low IAIP	M	1327	6	1.07	4.01	5.9	0.321	1.47	18.27	262	11	80.2	214	27.8	66.2	0.8	5.1	0.2	0	0.3	0.71	0.01	0.05	0	0	6.8	272.3
T2	2	T	High CON	M	1193	6	1.53	5.08	6.4	0.362	1.25	17.55	343	12.2	71.3	215	40.5	57.1	1.5	0.5	0.2	0.1	0.62	0.87	0.02	0.01	0	0	6.2	317
U2	2	U	Low	M	741.5	6	1.81	3.72	5.2	0.288	1.4	18.08	285	11.8	77.5	218	35	61.7	0.4	2.7	0.1	0	0.63	1.12	0.01	0.05	0	0	7	258.7
V2	2	V	Low	M	1281	6	2.12	3.35	4.5	0.247	1.35	18.32	258	11.7	73.8	205	49.2	49.5	0.3	0.9	0.1	0	1.04	1.05	0.01	0.02	0	0	6	201.7
X2	2	X	Low	M	1111	6	1.26	3.85	5.3	0.276	1.39	19.35	281	12.9	71.7	213	59.4	34	0.3	6	0.1	0.2	0.75	0.43	0	0.08	0	0	6.3	241.3
Y2	2	Y	High	M	1340.4	6	0.86	4.53	6.1	0.342	1.35	17.82	270	11	75.5	219	33.9	63.9	0.3	1.6	0.2	0.1	0.29	0.55	0	0.01	0	0	6.3	285.4
Z2	2	Z	Low IAIP	F	1270	6	0.62	4.07	5.7	0.328	1.4	17.41	267	12.1	80.5	208	31.9	61.3	0.6	5.8	0.2	0.2	0.2	0.38	0	0.04	0	0	5.2	210.2
Æ2	2	Æ	Low IAIP	M	1180.8	6	1.11	4.26	6.3	0.333	1.48	18.99	386	9.5	78.2	216	20.5	77.2	0.4	1.9	0	0	0.23	0.86	0	0.02	0	0	7.1	302.8
Ø2	2	Ø	Low CON	F	1275	6	4.64	4.64	6.9	0.365	1.5	19.05	296	12	78.6	218	30.3	64.2	1.2	4.2	0.1	0	1.41	2.98	0.05	0.19	0.01	0	6	278.8
Å2	2	Å	Low	M	902	6	4.04	5.58	7.5	0.403	1.35	18.66	311	11.9	72.2	217	62.2	36.3	0.2	1.3	0.1	0	2.51	1.47	0.01	0.05	0	0	5.6	311.6
A3	3	A	High	F	725	6	0.39	3.67	5.6	0.325	1.53	17.19	281	12	88.7	216	24.5	71.7	0.3	2.4	0.7	0.3	0.1	0.28	0	0.01	0	0	7.1	260.3
ALPHA3	3	ALPHA	Low IAIP	M	847	6	0.8	3.46	5.8	0.309	1.68	18.81	263	11	89.4	215	8.8	86.4	0.2	4	0.6	0	0.07	0.7	0	0.03	0.01	0	6.4	221.7
B3	3	B	High	F	794	6	0.55	3.73	6	0.347	1.6	17.21	296	12.6	92.8	215	9.5	86.4	0.5	2.5	1.2	0	0.05	0.47	0	0.01	0.01	0	5.6	207.8
BETA3	3	BETA	Low IAIP	M	777	6	2.01	3.6	5.2	0.278	1.43	18.55	363	10.7	77.1	221	55.2	40.6	0.4	3.6	0.2	0	1.11	0.81	0.01	0.07	0	0	7.2	260.9
D3	3	D	High	M	949.7	6	0.44	3.79	5.4	0.319	1.43	16.95	282	11.9	84.3	219	20.5	69.9	2.8	6.3	0.3	0.3	0.09	0.31	0.01	0.03	0	0	4.9	185.1
G3	3	G	Low CON	F	993	6	3.2	3.86	5.7	0.298	1.48	19.14	398	10.4	77.4	217	45.3	51.4	0.8	2.4	0	0	1.45	1.65	0.03	0.08	0	0	6.9	266.1
GAMMA3	3	GAMMA	High	M	1159	6	0.38	3.67	5.8	0.315	1.58	18.46	345	10.6	85.8	205	10.5	82.3	0	7.3	0	0	0.04	0.32	0	0.03	0	0	8	291.8
H3	3	H	High	F	1104	6	0.37	3.47	5.2	0.299	1.49	17.25	267	11.7	86.4	221	13.5	82.6	0.8	2.4	0.7	0	0.05	0.3	0	0.01	0	0	6.3	219.3
I3	3	I	Low IAIP	F	996	6	1.64	3.82	5.5	0.295	1.43	18.48	354	10.5	77.3	216	42.8	53.4	0.1	3.4	0.3	0	0.7	0.88	0	0.06	0.01	0	6.8	259
J3	3	J	High	M	885	6	0.48	3.84	5.4	0.314	1.41	17.29	287	11	81.8	219	23.9	56.3	0.2	19.3	0.3	0	0.12	0.27	0	0.09	0	0	7.5	288.4
K3	3	K	High CON	F	984	6	2.67	3.8	5.3	0.317	1.41	16.82	335	12.9	83.5	229	53.2	44.5	1.2	1.1	0	0	1.42	1.19	0.03	0.03	0	0	4.9	185.4
L3	3	L	Low IAIP	M	1175	6	0.58	2.69	4.7	0.24	1.75	19.67	286	10.9	89.2	214	11.1	84.1	0.9	3.2	0.7	0	0.06	0.49	0.01	0.02	0	0	9.5	255.7
N3	3	N	Low	M	1219	6	0.89	3.41	4.9	0.278	1.44	17.69	314	11	81.5	220	42.6	56	0.2	1.1	0.1	0	0.38	0.5	0	0.01	0	0	7.8	265.5
O3	3	O	Low	F	849	6	2.07	3.66	5.4	0.302	1.47	17.85	441	11.4	82.5	227	58.8	39.9	0.5	0.8	0	0	1.22	0.82	0.01	0.02	0	0	7.8	286.3
P3	3	P	Low CON	M	1279	6	2.98	3.07	4.4	0.236	1.44	18.73	387	10.3	77.1	213	34.5	63.5	0.4	1.5	0.1	0.1	1.03	1.89	0.01	0.04	0	0	7.3	223
Q3	3	Q	High CON	M	676	6	2.16	2.42	4.1	0.218	1.67	18.57	304	11.7	90.1	207	50.7	46.5	1.5	1.1	0.2	0	1.09	1	0.03	0.02	0.01	0	7.2	175.5
R3	3	R	Low CON	M	637	6	2.5	3.61	5.4	0.298	1.49	18.08	342	11.3	82.6	220	38	59.6	0.7	1.5	0.2	0	0.95	1.49	0.02	0.04	0.01	0	9.6	346.7
T3	3	T	Low	M	1017	6	0.49	3.93	5.5	0.291	1.39	18.83	291	11.4	74.1	218	30.7	63.4	0.7	4.1	1	0	0.15	0.31	0	0.02	0.01	0	9.1	355.9
U3	3	U	Low	F	909	6	1.45	3.66	5.7	0.304	1.56	18.78	375	11.1	83	216	4.8	90.2	0.4	4.6	0.1	0	0.07	1.3	0.01	0.07	0	0	7.2	263.1
V3	3	V	Low	F	795	6	1.2	3.79	5.7	0.303	1.49	18.67	297	11.4	80	215	27.1	69.3	0.9	2.6	0.1	0	0.32	0.83	0.01	0.03	0	0	6.3	237.1
X3	3	X	Low CON	F	828	6	5.35	2.97	4.3	0.248	1.46	17.52	303	11.3	83.4	214	72.6	23.1	1.1	3.1	0.2	0	3.89	1.24	0.06	0.16	0.01	0	6.7	198.8
Y3	3	Y	Low	F	702	6	2.2	4.09	6.2	0.338	1.52	18.35	270	13	82.8	230	61.8	33.2	0.5	4.3	0.2	0	1.36	0.73	0.01	0.1	0.01	0	5.1	209.3
Æ3	3	Æ	High CON	F	908	6	1.82	3.57	5.3	0.303	1.49	17.6	361	10.4	84.8	222	26.3	72.4	0.3	0.9	0	0.1	0.48	1.32	0.01	0.02	0	0	7.3	261.6
ø3	3	ø	Low IAIP	F	826	6	0.4	4.01	5.8	0.319	1.45	18.22	327	11.4	79.5	218	7.7	88.1	0	1.5	0.06	0	0.04	0.35	0	0.01	0	0	7.3	293
Å3	3	Å	Low IAIP	F	970	6	1	3.64	5.1	0.286	1.41	17.94	252	12.2	78.5	225	34.9	61.8	0.2	2.9	0.1	0	0.35	0.62	0	0.03	0	0	7.6	276.3
A1	1	A	Low IAIP	M	803	12
B1	1	B	High	F	1222	12
C1	1	C	Low	F	1065.9	12	0.67	3.92	5.7	0.299	1.44	18.92	282	11	76.2	219	37.1	56	1.1	5.8	0.8	0	0.25	0.38	0.01	0.04	0.01	0	7.1	276.8
D1	1	D	Low	F	1224	12
E1	1	E	Low	M	1174	12	2.42	3.72	5.4	0.301	1.46	18.02	284	11	80.9	220	5.6	89.1	0	5.3	0.1	0	0.14	2.16	0	0.13	0	0	5	186.5
F1	1	F	High	F	1038.5	12	0.76	3.69	5.7	0.315	1.54	18.1	233	12.1	85.3	220	52.8	42.5	0.8	3.3	0.5	0	0.4	0.32	0.01	0.03	0	0	5	184.2
G1	1	G	Low	F	932.1	12	1.91	3.83	5.6	0.279	1.46	20.08	286	11.5	72.7	209	29.5	62.1	1.2	6.7	0.5	0	0.56	1.19	0.02	0.13	0.01	0	5.2	199.2
H1	1	H	High CON	M	1165	12	2.67	4.19	5.8	0.335	1.38	17.26	271	11.7	80	220	58	33.4	0.8	7.6	0.2	0	1.55	0.89	0.02	0.2	0.01	0	5.4	227.7
I1	1	I	High	M	1075	12	0.79	3.8	5.3	0.299	1.4	17.73	247	11.4	78.8	218	67.8	27.6	0	4.1	0.5	0	0.54	0.22	0	0.03	0	0	4.3	162.9
J1	1	J	Low IAIP	M	1324.5	12	2.44	2.7	4.5	0.221	1.67	20.28	177	11.7	82.2	204	37.1	56.2	1.2	4.9	0.4	0.2	0.91	1.37	0.03	0.12	0.01	0	6.5	175.6
K1	1	K	Low CON	M	1206.8	12	4.27	4.26	5.7	0.317	1.35	18.08	381	11.7	74.5	224	23.6	72.3	0.2	3.8	0.1	0.1	1.01	3.09	0.01	0.16	0	0	6.3	269
L1	1	L	High CON	F	1129	12	2.63	3.87	5.5	0.307	1.42	17.93	415	10.4	79.2	219	52.7	45.1	0.7	1.4	0	0	1.39	1.19	0.02	0.04	0	0	6.9	265.7
M1	1	M	Low IAIP	F	1191	12	0.78	4.18	5.5	0.293	1.32	18.84	245	12.2	70.1	223	65.3	21.8	2.2	10.3	0.3	0.2	0.51	0.17	0.02	0.08	0	0	5.8	240.8
N1	1	N	High	M	1468	12	0.63	2.75	3.9	0.217	1.43	18.14	125	12.2	78.9	224	25.7	71.4	0.4	2.5	0	0	0.16	0.45	0	0.02	0	0	5.6	154.6
O1	1	O	Low	M	1314.8	12	1	3.76	5.2	0.271	1.39	19.34	191	11.8	72	227	72.6	24.1	0.5	2.6	0.3	0	0.73	0.24	0	0.03	0	0	5.9	221.9
P1	1	P	Low IAIP	M	981	12
R1	1	R	Low IAIP	F	988.2	12	0.79	2.4	3.6	0.193	1.5	18.61	204	12.3	80.5	203	25	64.8	0.6	9.6	0.2	0	0.2	0.51	0	0.08	0	0	4.6	109.9
S1	1	S	Low CON	F	1004	12	2.38	3.74	6.3	0.337	1.69	18.73	348	10.5	90.2	217	39.1	55.6	0.8	4.5	0	0	0.93	1.32	0.02	0.11	0	0	5.7	213.4
A2	2	A	Low IAIP	M	1210	12	0.91	3.85	6.2	0.318	1.6	19.39	263	10.7	82.6	198	29	66	0.5	4.3	0.1	0	0.26	0.6	0	0.04	0	0	7	269.3
B2	2	B	Low IAIP	F	1015	12	0.71	4.15	5.4	0.306	1.3	17.61	236	14.8	73.7	215	35.8	57.5	0.8	5.7	0.2	0	0.25	0.41	0.01	0.04	0	0	5.8	240.1
C2	2	C	Low IAIP	F	1210	12	0.95	4.55	6.1	0.338	1.34	18.1	257	12.5	74.2	210	57.8	39.4	0.2	2.4	0.1	0	0.55	0.37	0	0.02	0	0	4	182.2
D2	2	D	Low	F	1041	12	0.87	2.84	3.8	0.21	1.35	18.24	202	13.6	74	203	52.4	42.5	0.1	4.4	0.4	0.1	0.46	0.37	0	0.04	0	0	6.7	189.6
E2	2	E	Low	F	1260.6	12	0.95	4.23	6.1	0.334	1.44	18.29	281	11.6	78.9	218	49.8	46.2	0	3.7	0.3	0	0.47	0.44	0	0.04	0	0	5.5	231.9
F2	2	F	High	M	1189	12	0.48	4.55	6.3	0.38	1.39	16.66	196	16.4	83.5	218	54	40.6	1	4.5	0	0	0.26	0.2	0	0.02	0	0	3.4	153.6
G2	2	G	High CON	F	1387	12	2.76	4.85	6.5	0.376	1.34	17.33	318	12.5	77.5	222	38.8	59.2	1	0.8	0	0.1	1.07	1.63	0.03	0.02	0	0	4.9	235.7
H2	2	H	High	M	1243	12
I2	2	I	High CON	M	1015.2	12	2.22	4.66	6	0.346	1.3	17.48	337	12	74.2	214	37.9	60.3	1	0.7	0.1	0	0.84	1.34	0.02	0.01	0	0	5.7	268.1
J2	2	J	Low IAIP	F	678	12	0.8	3.95	5.5	0.303	1.39	18.1	238	11.4	76.8	210	30.6	64.5	0.2	4.6	0.2	0	0.24	0.51	0	0.04	0	0	5.4	212.9
K2	2	K	Low	M	1405	12	0.83	3.91	5.6	0.305	1.42	18.24	255	11.6	78	212	24.1	69	0	6.7	0.2	0	0.2	0.58	0	0.06	0	0	5.8	226.2
L2	2	L	Low CON	M	1202.8	12	3.28	4.5	6.8	0.364	1.51	18.69	378	10.9	80.9	220	36.2	61	1.2	1.5	0.1	0	1.19	2	0.04	0.05	0	0	5.8	259.1
M2	2	M	Low IAIP	M	1261	12	0.69	4.17	6	0.32	1.44	18.75	239	13.2	76.7	221	23.5	72.5	0.4	3.5	0.2	0	0.16	0.5	0	0.02	0	0	4.4	181.7
N2	2	N	High	M	791	12	0.79	3.9	6.3	0.35	1.62	18.03	141	12.5	89.6	206	14.9	80.6	0.5	1.8	2.1	0	0.12	0.64	0	0.01	0.02	0	7.2	280.7
O2	2	O	Low CON	M	1031	12	3.26	4	5.6	0.3	1.4	18.67	315	12.3	74.9	210	34.8	62	0.7	2.3	0	0.2	1.14	2.02	0.02	0.08	0	0.01	6.2	246.3
P2	2	P	Low IAIP	F	1098.7	12	1.32	4.21	6.1	0.331	1.44	18.38	286	11.7	78.5	206	71.3	26.7	0.1	1.8	0.1	0	0.94	0.35	0	0.02	0	0	5.2	217.6
Q2	2	Q	High	F	793.5	12	0.75	3.66	4.7	0.264	1.29	17.88	228	13.3	72.2	212	55.8	36.7	0.2	7	0.3	0	0.42	0.27	0	0.05	0	0	4.4	160.2
R2	2	R	High	F	1303	12	1.24	4.17	6.1	0.335	1.46	18.15	151	11.2	80.4	209	32.6	60.4	0.2	5.9	0.8	0	0.4	0.75	0	0.07	0.01	0	5.1	210.7
S2	2	S	Low IAIP	M	1327	12	1.12	3.82	5.8	0.315	1.51	18.25	209	12.2	82.6	208	12.2	85.2	0	2.3	0.3	0	0.14	0.96	0	0.03	0	0	5.2	197.7
T2	2	T	High CON	M	1193	12	2.27	4.62	5.8	0.347	1.27	16.88	289	15.8	75	219	49.7	48	0.9	1.3	0	0.1	1.13	1.09	0.02	0.03	0	0	5.1	236.2
U2	2	U	Low	M	741.5	12	0.81	3.3	4.7	0.255	1.42	18.36	258	12.8	77.1	210	14.9	79.1	1.5	4.3	0.2	0	0.12	0.64	0.01	0.03	0	0	5.7	187
V2	2	V	Low	M	1281	12	1.05	3.12	4.2	0.232	1.34	17.97	218	13.6	74.5	203	25.3	70.1	0.9	3.7	0	0	0.27	0.74	0.01	0.04	0	0	5.1	159.9
X2	2	X	Low	M	1111	12	1.13	3.49	4.7	0.251	1.36	18.84	281	13.9	71.9	211	15.5	78.4	0	5.9	0.1	0	0.18	0.89	0	0.07	0	0	5.1	176.6
Y2	2	Y	High	M	1340.4	12	0.39	4.08	5.5	0.315	1.34	17.33	196	13.6	77.2	211	29.7	67.8	0	2.5	0	0	0.12	0.27	0	0.01	0	0	4.4	178.9
Z2	2	Z	Low IAIP	F	1270	12	1.18	3.96	6	0.332	1.51	17.96	244	13.3	83.9	188	37.2	59.8	0.2	2.8	0	0	0.44	0.71	0	0.03	0	0	4.3	171.2
Æ2	2	Æ	Low IAIP	M	1180.8	12	0.52	4	5.8	0.336	1.45	17.28	322	11.3	84	194	52.1	35.6	0.5	11.4	0.5	0	0.27	0.18	0	0.06	0	0	4.2	169
Ø2	2	Ø	Low CON	F	1275	12	5.1	4.18	6.3	0.327	1.51	19.25	277	12.9	78.2	220	27.8	67.4	0.5	4	0.1	0.3	1.42	3.44	0.03	0.2	0	0.01	6.2	259.3
Å2	2	Å	Low	M	902	12	1.54	4.75	6.4	0.347	1.35	18.52	228	12.7	73	219	61.2	36	0.6	2.1	0.1	0	0.94	0.56	0.01	0.03	0	0	4.7	225.6
A3	3	A	High	F	725	12	0.49	3.15	5.1	0.306	1.62	16.64	211	13.2	97.3	211	14.3	82.4	0.3	2.5	0.3	0.3	0.07	0.4	0	0.01	0	0	3.9	122.5
ALPHA3	3	ALPHA	Low IAIP	M	847	12	0.91	3.2	5.6	0.3	1.76	18.8	215	13.6	93.7	202	22	68.3	0.4	8.2	0.8	0.3	0.2	0.62	0	0.08	0.01	0	4.1	132.1
B3	3	B	High	F	794	12
BETA3	3	BETA	Low IAIP	M	777	12	0.82	2.83	4.2	0.221	1.5	19.22	257	11.9	78.1	216	6.1	89.2	0	4.5	0.2	0	0.05	0.73	0	0.04	0	0	6	168.9
D3	3	D	High	M	949.7	12	0.55	3.29	5	0.291	1.53	17.36	214	13.1	88.4	218	39.6	50.4	0.5	8.9	0.7	0	0.22	0.28	0	0.05	0	0	4.1	135.8
G3	3	G	Low CON	F	993	12	4.17	3.74	5.6	0.3	1.5	18.73	386	11.2	80.1	218	46	50	0.6	3.1	0.2	0.2	1.92	2.08	0.03	0.13	0.01	0.01	6.4	240.5
GAMMA3	3	GAMMA	High	M	1159	12	0.85	3.35	5.5	0.316	1.63	17.26	261	13.1	94.3	190	9.3	86.2	0.6	3.6	0.3	0	0.08	0.73	0	0.03	0	0	2.7	89.7
H3	3	H	High	F	1104	12	0.78	3.12	4.9	0.303	1.55	16	201	15.8	97	191	22.2	61.5	0.3	15	0.8	0.2	0.17	0.48	0	0.12	0.01	0	1.8	55.3
I3	3	I	Low IAIP	F	996	12	0.62	3.45	4.7	0.27	1.37	17.48	245	12.1	78.1	223	51.3	40.8	0.9	6.4	0.6	0	0.32	0.25	0.01	0.04	0	0	6.5	223.3
J3	3	J	High	M	885	12	0.64	3.16	4.6	0.27	1.46	17.13	208	12.9	85.3	215	50.6	43.2	0	4.4	1.8	0	0.32	0.28	0	0.03	0.01	0	6.1	192.7
K3	3	K	High CON	F	984	12	3.14	3.85	5.6	0.326	1.45	17.15	321	14	84.5	233	42.7	56.2	0.7	0.4	0.1	0	1.34	1.76	0.02	0.01	0	0	4.6	176.1
L3	3	L	Low IAIP	M	1175	12	1.92	2.22	4.2	0.201	1.89	20.85	228	11.4	90.7	207	18.5	75.7	0.1	5.4	0.2	0.1	0.36	1.46	0	0.1	0	0	7	156
N3	3	N	Low	M	1219	12	0.69	2.82	4.2	0.233	1.48	17.84	186	12.8	82.9	213	54.2	38.1	0	7.5	0.2	0	0.37	0.26	0	0.05	0	0	6.2	174.5
O3	3	O	Low	F	849	12	1.65	3.3	5.1	0.272	1.55	18.78	367	12.5	82.3	228	67.3	28.7	0.4	3.4	0.2	0	1.11	0.47	0.01	0.06	0	0	7.6	252.4
P3	3	P	Low CON	M	1279	12	2.83	3	4.3	0.234	1.43	18.23	353	11.1	78.2	213	35.8	62.3	0.7	1	0.1	0.1	1.01	1.76	0.02	0.03	0	0	6.8	203.3
Q3	3	Q	High CON	M	676	12	2.25	2.32	3.8	0.208	1.65	18.34	289	12.3	89.8	207	34.7	63.4	0.8	0.8	0.3	0	0.78	1.42	0.02	0.02	0.01	0	7.1	164.4
R3	3	R	Low CON	M	637	12	2.35	3.42	5.3	0.284	1.55	18.66	333	11.6	82.9	221	38.3	60.1	0.7	0.8	0.1	0	0.9	1.41	0.02	0.02	0	0	9.1	311.7
T3	3	T	Low	M	1017	12
U3	3	U	Low	F	909	12
V3	3	V	Low	F	795	12	0.6	3.13	4.6	0.256	1.48	18.02	231	12.9	82	207	26.2	69.8	0.2	2	1.3	0.4	0.16	0.42	0	0.01	0.01	0	5.4	170.1
X3	3	X	Low CON	F	828	12	4.97	2.59	4.1	0.219	1.6	18.86	250	12.4	84.7	209	54	43.2	1	1.1	0.6	0	2.69	2.15	0.05	0.06	0.03	0	5.4	140.5
Y3	3	Y	Low	F	702	12	1.04	3.4	4.9	0.285	1.46	17.32	245	13.1	84	229	63.3	32.9	0.4	3	0.1	0.3	0.66	0.34	0	0.03	0	0	5	168.6
Æ3	3	Æ	High CON	F	908	12	2.3	3.32	5	0.297	1.52	16.95	339	11.9	89.4	212	45.7	51.5	1.5	1.2	0.1	0	1.05	1.19	0.03	0.03	0	0	6.4	211.1
ø3	3	ø	Low IAIP	F	826	12	0.57	3.39	4.9	0.278	1.45	17.7	212	13.4	82.2	217	30.5	64.1	0.6	3.4	1.1	0.2	0.17	0.36	0	0.02	0.01	0	7.2	243.9
Å3	3	Å	Low IAIP	F	970	12	1.33	2.89	4.3	0.228	1.48	18.75	216	12.5	79	216	46	48.8	0.1	4.7	0.4	0	0.61	0.65	0	0.06	0.01	0	6.6	191.9
A1	1	A	Low IAIP	M	803	22
B1	1	B	High	F	1222	22	0.66	3.64	5	0.276	1.37	18.03	280	11	75.8	214	69.6	20	0	9.6	0.8	0	0.46	0.13	0	0.06	0.01	0	6	216.9
C1	1	C	Low	F	1065.9	22	1.39	6.68	5.2	0.269	1.41	19.33	242	12.1	73.1	220	70.5	17.4	2.4	9.4	0.3	0	0.98	0.24	0.03	0.13	0	0	6.5	240.6
D1	1	D	Low	F	1224	22
E1	1	E	Low	M	1174	22	1.87	3.77	5.4	0.285	1.44	19.06	222	10.9	75.5	235	85.6	10.6	0.1	3.5	0.3	0	1.6	0.2	0	0.06	0.01	0	5.2	197.5
F1	1	F	High	F	1038.5	22	1.68	2.34	3.6	0.215	1.56	16.93	118	15.4	91.9	187	48.2	42.1	1.4	7.5	0.4	0.4	0.81	0.71	0.02	0.13	0.01	0.01	1.1	26
G1	1	G	Low	F	932.1	22	3.57	3.38	4.9	0.243	1.45	20.11	252	12.3	72	221	71.4	24.8	0.5	2.8	0.3	0.2	2.55	0.89	0.02	0.1	0.01	0.01	5.1	171
H1	1	H	High CON	M	1165	22	2.45	3.59	5	0.265	1.39	18.79	277	12.3	73.8	229	69.7	22.1	5.4	2.7	0	0	1.71	0.54	0.13	0.07	0	0	5.1	182.4
I1	1	I	High	M	1075	22	1.69	3.3	4.6	0.26	1.38	17.48	214	12.7	78.8	217	79.3	15.4	0.5	4.5	0.2	0.2	1.37	0.26	0.01	0.08	0	0	4	131.4
J1	1	J	Low IAIP	M	1324.5	22
K1	1	K	Low CON	M	1206.8	22	1.73	1.85	2.7	0.13	1.46	20.8	240	12.7	70.1	222	29.1	65.3	0.4	5.2	0	0	0.5	1.13	0.01	0.09	0	0	6.3	117
L1	1	L	High CON	F	1129	22	2.39	3.72	5.2	0.282	1.4	18.51	378	11	75.8	223	84.3	13.4	0.5	1.7	0	0	2.02	0.32	0.01	0.04	0	0	6.3	235.3
M1	1	M	Low IAIP	F	1191	22	3.07	3.77	4.8	0.252	1.28	19.06	207	13.3	66.9	227	85.7	11.3	0.1	2.7	0.1	0.1	2.63	0.35	0	0.08	0	0	5.7	215.2
N1	1	N	High	M	1468	22
O1	1	O	Low	M	1314.8	22	0.76	3.6	5	0.254	1.39	19.72	186	12.4	70.5	215	63.4	28.5	0.9	6.9	0	0.4	0.48	0.22	0.01	0.05	0	0	4.9	176.8
P1	1	P	Low IAIP	M	981	22
R1	1	R	Low IAIP	F	988.2	22	0.59	2.06	3.4	0.174	1.65	19.62	167	15	84.2	171	53.6	32.1	2.9	10.3	0.6	0.6	0.31	0.19	0.02	0.06	0	0	2.9	60.3
S1	1	S	Low CON	F	1004	22	2.11	3.89	6	0.325	1.54	18.43	315	9.9	83.6	231	65.7	30.9	0.9	2.5	0	0	1.39	0.65	0.02	0.05	0	0	7.7	299.2
A2	2	A	Low IAIP	M	1210	22
B2	2	B	Low IAIP	F	1015	22	2.53	4.05	5.6	0.318	1.37	17.51	214	17.6	78.4	185	56.2	33.3	0.1	9.6	0.7	0.1	1.42	0.84	0	0.24	0.02	0	4.2	171
C2	2	C	Low IAIP	F	1210	22	1.17	4.78	6.3	0.34	1.32	18.5	219	13.1	71.2	´204	37	57.3	0.6	4.9	0.1	0	0.43	0.67	0.01	0.06	0	0	3.5	168.1
D2	2	D	Low	F	1041	22	2.61	2.66	3.6	0.187	1.35	19.29	151	16	70.2	202	81.9	15.5	0.5	1.3	0.1	0.7	2.14	0.4	0.01	0.03	0	0.02	5.8	154.9
E2	2	E	Low	F	1260.6	22	1.27	3.95	5.6	0.297	1.42	18.91	221	13.1	75.1	210	19.1	75.2	0.6	5.2	0	0	0.24	0.96	0.01	0.07	0	0	4.6	180.5
F2	2	F	High	M	1189	22
G2	2	G	High CON	F	1387	22	3.4	4.67	6.4	0.354	1.37	18.06	293	15.7	75.7	216	57.7	40.1	0.8	1	0.2	0.2	1.96	1.36	0.03	0.04	0.01	0.01	4.4	206
H2	2	H	High	M	1243	22
I2	2	I	High CON	M	1015.2	22	2.55	4.41	5.7	0.313	1.3	18.35	345	14.7	71	220	40.3	58.1	0.5	1	0.1	0.1	1.03	1.48	0.01	0.02	0	0	4.4	192.6
J2	2	J	Low IAIP	F	678	22	1.86	3.29	4.4	0.237	1.33	18.48	155	13.1	72	209	43.3	54.3	0	2.4	0	0	0.8	1.01	0	0.04	0	0	4.9	162.5
K2	2	K	Low	M	1405	22	1.5	3.62	5.3	0.274	1.45	19.17	217	12.3	75.7	210	62.8	35	0.1	1.5	0.4	0.1	0.94	0.53	0	0.02	0.01	0	4.9	176.4
L2	2	L	Low CON	M	1202.8	22	3.43	3.99	6.1	0.32	1.52	18.97	391	11.8	80.2	224	33.7	63.9	0.7	1.7	0	0	1.16	2.19	0.02	0.06	0	0	5.1	205.3
M2	2	M	Low IAIP	M	1261	22	1.74	4.07	5.9	0.301	1.45	19.52	195	14	74.1	215	45.6	50.7	0.1	3.5	0	0.1	0.79	0.88	0	0.06	0	0	4.1	168.1
N2	2	N	High	M	791	22
O2	2	O	Low CON	M	1031	22	3.31	3.63	5	0.26	1.38	19.24	370	14.6	71.8	216	30.1	66.8	0.3	2.6	0	0.3	1	2.21	0.01	0.09	0	0.01	5.4	194.2
P2	2	P	Low IAIP	F	1098.7	22	1.89	4.56	6.7	0.351	1.47	19.02	237	11.9	77.1	208	69.1	27	0.7	2.7	0.2	0.3	1.31	0.51	0.01	0.05	0	0.01	4.6	209
Q2	2	Q	High	F	793.5	22	0.56	3.56	4.7	0.248	1.33	19.08	123	15.3	69.5	201	65	31.4	0.8	2.5	0.2	0	0.36	0.18	0	0.01	0	0	4.1	146
R2	2	R	High	F	1303	22
S2	2	S	Low IAIP	M	1327	22	2.01	3.53	5.1	0.28	1.44	18.07	201	13.9	79.5	209	61.3	36.5	0.2	1.4	0.3	0.4	1.23	0.73	0	0.03	0.01	0.01	5.5	193.1
T2	2	T	High CON	M	1193	22	2.02	1.99	2.9	0.152	1.44	18.86	180	17.5	76.3	189	47.6	49.6	0.6	2	0.1	0	0.96	1	0.01	0.04	0	0	2.7	54.3
U2	2	U	Low	M	741.5	22	4.94	2.93	4.9	0.258	1.67	18.95	175	17.9	88	159	25.6	69.9	0.4	2.6	0.8	0.6	1.26	3.45	0.02	0.13	0.04	0.03	0.6	18.2
V2	2	V	Low	M	1281	22	1.72	3.11	4.1	0.219	1.33	18.78	193	14.5	70.6	208	67	30.2	0	2.5	0.1	0.1	1.15	0.52	0	0.04	0	0	4.9	150.7
X2	2	X	Low	M	1111	22	1.5	3.4	4.7	0.244	1.39	19.39	237	16.9	71.8	199	68.8	29.8	0.1	1.1	0.2	0	1.03	0.45	0	0.02	0	0	4.6	156.2
Y2	2	Y	High	M	1340.4	22	0.7	3.84	5.1	0.284	1.34	18.08	156	15.5	73.9	209	38.4	52.5	1.8	7.1	0.2	0	0.27	0.37	0.01	0.05	0	0	4.5	173.5
Z2	2	Z	Low IAIP	F	1270	22
Æ2	2	Æ	Low IAIP	M	1180.8	22
Ø2	2	Ø	Low CON	F	1275	22	4.67	3.94	5.4	0.29	1.37	18.61	253	12.9	73.7	221	23	75.3	0.6	0.8	0.1	0.1	1.07	3.52	0.03	0.04	0	0.01	7.2	281.9
Å2	2	Å	Low	M	902	22	1.17	4.36	5.8	0.306	1.34	19.04	213	16.4	70.2	218	68.6	25.9	0.4	4.9	0.1	0.1	0.8	0.3	0	0.06	0	0	4.5	194.9
A3	3	A	High	F	725	22	0.76	2.64	4	0.233	1.52	17.21	170	13.5	88.3	207	38	58.5	1.5	2	0	0	0.29	0.45	0.01	0.01	0	0	5.4	142.3
ALPHA3	3	ALPHA	Low IAIP	M	847	22	2.57	3.18	5.7	0.291	1.79	19.58	217	14.2	91.4	191	23.7	72	0.2	3.7	0.3	0.1	0.61	1.85	0.01	0.09	0.01	0	5.2	164.1
B3	3	B	High	F	794	22
BETA3	3	BETA	Low IAIP	M	777	22	1.09	2.61	3.5	0.194	1.33	17.88	168	14.3	74.2	201	24	71.7	0	3.8	0.4	0.1	0.26	0.78	0	0.04	0	0	5.2	134.9
D3	3	D	High	M	949.7	22
G3	3	G	Low CON	F	993	22	4.14	3.68	5.3	0.278	1.45	19.19	385	12.2	75.7	225	42.1	54	0.5	3.4	0	0	1.74	2.23	0.02	0.14	0	0	5.9	216.8
GAMMA3	3	GAMMA	High	M	1159	22	1.97	3.23	5.3	0.312	1.63	16.86	186	15.1	96.5	164	15.2	71.3	0.5	12.2	0.7	0.1	0.3	1.4	0.01	0.24	0.01	0	1.9	62.9
H3	3	H	High	F	1104	22
I3	3	I	Low IAIP	F	996	22	1.12	3.53	4.9	0.259	1.39	18.89	238	12.3	73.4	211	43.7	53.1	0.2	2.4	0.5	0.1	0.49	0.59	0	0.03	0.01	0	6.4	226.7
J3	3	J	High	M	885	22	0.76	2.57	3.7	0.234	1.45	15.97	165	14.6	91	205	13.3	84.1	0.5	1	1	0.2	0.1	0.64	0	0.01	0.01	0	3.4	87.6
K3	3	K	High CON	F	984	22	3.57	3.81	5.2	0.307	1.36	16.87	263	17.6	80.7	220	43.5	55	0.9	0.5	0.1	0	1.55	1.96	0.03	0.02	0	0	3.4	130.3
L3	3	L	Low IAIP	M	1175	22	2.35	1.85	3.3	0.157	1.77	20.78	195	12.4	85	199	39	56.7	1.7	2.4	0.1	0.1	0.92	1.33	0.04	0.06	0	0	9.1	168.3
N3	3	N	Low	M	1219	22	1.08	3.31	4.9	0.261	1.47	18.62	164	13.6	79	207	58.5	37.7	0.2	2.6	0.8	0.2	0.63	0.41	0	0.03	0.01	0	6.1	202.6
O3	3	O	Low	F	849	22	1.32	3.17	4.7	0.249	1.47	18.69	306	13.7	78.6	225	69.5	26	0.7	3.2	0.4	0.1	0.92	0.34	0.01	0.04	0.01	0	6.9	215.3
P3	3	P	Low CON	M	1279	22
Q3	3	Q	High CON	M	676	22	2.7	2.06	3.3	0.185	1.61	17.9	238	13.3	90	202	52.1	45.8	1	1	0.1	0	1.41	1.24	0.03	0.03	0	0	7.2	148.3
R3	3	R	Low CON	M	637	22	4.46	3.33	4.8	0.263	1.45	18.37	332	12.5	78.8	219	48.8	49.4	0.5	1	0.1	0.1	2.18	2.2	0.02	0.05	0	0.01	8.9	296.2
T3	3	T	Low	M	1017	22
U3	3	U	Low	F	909	22
V3	3	V	Low	F	795	22	2.88	3.18	4.9	0.253	1.53	19.23	209	13.4	79.6	205	43.4	49.1	0.1	7.5	0.2	0	1.25	1.41	0	0.21	0.01	0	4.4	139.6
X3	3	X	Low CON	F	828	22	4.84	2.52	4	0.206	1.58	19.31	226	13.3	81.9	211	55.4	41.5	1.4	1.4	0.3	0.1	2.68	2.01	0.07	0.07	0.01	0	5.5	139.5
Y3	3	Y	Low	F	702	22	2.45	3.19	4.8	0.254	1.51	19.01	204	14.1	79.6	225	82.7	14	0.9	1.7	0.4	0.4	2.03	0.34	0.02	0.04	0.01	0.01	3.6	113.9
Æ3	3	Æ	High CON	F	908	22	2.74	3.16	4.7	0.27	1.47	17.24	305	13.2	85.4	206	39.5	58.9	0.9	0.6	0	0	1.08	1.61	0.03	0.02	0	0	5.6	178.4
Ø3	3	Ø	Low IAIP	F	826	22	3.49	3.09	4.6	0.252	1.5	18.34	212	12.3	81.6	207	17.9	78.2	0	3.8	0.1	0	0.62	2.73	0	0.13	0	0	5	154.1
Å3	3	Å	Low IAIP	F	970	22

## Sheet: Brain
Litter	Kill_number	Treatment	Sample_Time	Brain_weight_total_g	Remnant_g	Foil_weight_g	Total_dry_weight_g	Water_percentage	ChoroidPlexus	CSF	CSF_Cell_count	CSF_cells/uL
1	104-21	LOW-IAIP	2021-05-11		10.67	0.485	1.932	86.4386	yes
1	105-21	HIGH-SE	2021-05-11		10.13	0.471	2.006	84.847	yes
1	106-21	LOW-PLACEBO	2021-05-11		9.69	0.454	1.836	85.7379	yes
1	107-21	HIGH-SE	2021-05-11		10.75	0.504	2.234	83.907	yes
1	108-21	LOW-PLACEBO	2021-05-11		9.96	0.487	1.972	85.0904	yes
1	109-21	LOW-PLACEBO	2021-05-11		10.26	0.477	1.949	85.653	yes
1	110-21	LOW-CON	2021-05-11		9.899	0.507	1.906	85.8673	yes
1	111-21	HIGH-CON	2021-05-11		10.12	0.487	1.86	86.4328	yes
1	112-21	LOW-CON	2021-05-11		9.23	0.521	1.842	85.688	yes
1	113-21	HIGH-CON	2021-05-11		10.84	0.479	2.019	85.7934	yes
1	114-21	LOW-IAIP	2021-05-11		10.85	0.472	2.024	85.6959	yes
2	115-21	HIGH-SE	2021-05-18 00:30:00	27.238	9.563	0.452	1.995	83.8649	yes	no	3	15
2	116-21	LOW-IAIP	2021-05-18 01:20:00	28.4	9.956	0.472	2.04	84.2507	yes	yes
2	117-21	LOW-IAIP	2021-05-18 02:21:00	28.12	9.886	0.486	1.932	85.3733	yes	no
2	118-21	HIGH-SE	2021-05-18 02:36:00	28.111	9.987	0.491	2.042	84.4698	yes	no
2	119-21	HIGH-SE	2021-05-18 02:50:00	27.117	9.449	0.478	1.817	85.8292	yes	yes	0.25	1.25
2	120-21	LOW-IAIP	2021-05-18	30.23	10.74	0.52	2.016	86.0708	yes	yes	1	5
2	121-21	LOW-PLACEBO	??
2	122-21	HIGH-SE	2021-05-18	29.239	10.817	0.493	2.121	84.9496	yes	no
2	123-21	LOW-IAIP	2021-05-18 09:25:00	25.144	9.228	0.528	1.974	84.3303	yes	no
2	124-21	HIGH-SE	2021-05-18	28.224	10.592	0.485	2.077	84.9698	yes	yes
2	125-21	LOW-IAIP	2021-05-18	33.03	12	0.51	2.321	84.9083	yes	no
2	126-21	LOW-IAIP	2021-05-18	29.799	10.53	0.523	2.144	84.6059	yes	yes	3	15
2	127-21	LOW-PLACEBO	2021-05-18	27.526	10.53	0.506	2.043	85.4036	yes	yes	1	5
2	128-21	LOW-IAIP	2021-05-18	24.41	9.009	0.525	1.851	85.2814	yes	no
2	129-21	LOW-IAIP	2021-05-18	27.76	10.197	0.516	1.992	85.5252	yes	no
2	130-21	LOW-PLACEBO	2021-05-18	25.22	9.44	0.475	1.844	85.4979	yes	no
2	131-21	LOW-CON	2021-05-18	28	10.134	0.495	1.832	86.8068	yes	yes	0.25	1.25
2	132-21	HIGH-CON	2021-05-18	27.68	9.835	0.481	1.949	85.0737	yes	yes	0	0
2	133-21	LOW-PLACEBO	2021-05-18	27.852	9.647	0.46	1.836	85.7365		yes	2	10
2	134-21	LOW-CON	2021-05-18	27.734	9.635	0.496	1.9	85.4281	yes	yes	1.75	8.75
2	135-21	HIGH-CON	2021-05-18	28.5	11.062	0.483	2.158	84.8581	yes	yes	0	0
2	136-21	LOW-PLACEBO	2021-05-18	27.841	9.256	0.489	1.765	86.2143	yes	yes	2	10
2	137-21	LOW-CON	2021-05-18	29.681	10.386	0.522	1.959	86.1641	yes	yes	0	0
2	138-21	HIGH-CON	2021-05-18	29.466	10.8164	0.523	2.255	83.9873	yes	yes	0	0
2	139-21	LOW-PLACEBO	2021-05-18	28.424	9.82	0.494	1.903	85.6517	yes	yes	1.5	7.5
2	140-21	LOW-IAIP	2021-05-18	29.906	10.323	0.503	2.023	85.2756	yes	no
2	141-21	LOW-PLACEBO	2021-05-18	27.938	9.848	0.467	1.954	84.9005	yes	yes	7.5	37.5
3	142-21	LOW-PLACEBO	2021-05-25 21:50:00	27.2	9.576	0.493			yes	yes	0.75	3.75
3	143-21	HIGH-SE	2021-05-25 22:00:00	24.97	8.685	0.475			yes	no
3	144-21	LOW-PLACEBO	2021-05-25 22:13:00	27.115	9.035	0.483			yes	no
3	145-21	HIGH-SE	2021-05-26 01:30:00	26.3	9.229	0.508			yes	no
3	146-21	HIGH-SE	2021-05-26 02:06:00	26.514	9.662	0.497			yes	no
3	147-21	LOW-IAIP	2021-05-26 02:30:00	29.538	10.617	0.517			yes	yes	1	5
3	148-21	HIGH-SE	2021-05-26 04:17:00	27.771	9.748	0.456			yes	yes	0.25	1.25
3	149-21	LOW-IAIP	2021-05-26 04:38:00	28.04	10.314	0.448			yes	yes
3	150-21	HIGH-SE	2021-05-26 04:57:00	24.57	8.539	0.448			yes	no
3	151-21	LOW-IAIP	2021-05-26 05:15:00	26.192	9.588	0.453			yes	no
3	152-21	LOW-IAIP	2021-05-26 05:33:00	26.16	9.677	0.453			yes	yes	2	10
3	153-21	LOW-IAIP	2021-05-26 09:05:00	26.44	9.426	0.453			yes	no
3	154-21	LOW-IAIP	2021-05-26	26.609	9.286	0.456			yes	yes	1	5
3	155-21	HIGH-SE	2021-05-26	26.34	9.126	0.46			yes	no
3	156-21	LOW-PLACEBO	2021-05-26	27.837	9.515	0.442			yes	yes	4	20
3	157-21	LOW-PLACEBO	2021-05-26	29.966	10.69	0.419			yes	no
3	158-21	LOW-PLACEBO	2021-05-26	25.05	8.4	0.425			yes	no
3	159-21	LOW-PLACEBO	2021-05-26	26.875	10.094	0.433			yes	yes	2	10
3	160-21	LOW-CON	2021-05-26	22.788	8.672	0.433			yes	yes	1.25	6.25
3	161-21	HIGH-CON	2021-05-26	26.42	9.846	0.443			yes	yes	0	0
3	162-21	LOW-CON	2021-05-26	26.79	10.3	0.452			yes	yes	0.25	1.25
3	163-21	HIGH-CON	2021-05-26	25.565	9.716	0.423			yes	yes	0.5	2.5
3	164-21	LOW-CON	2021-05-26	28.234	10.588	0.44			yes	yes	0	0
3	165-21	HIGH-CON	2021-05-26	26.02	9.634	0.437			yes	yes	0.75	3.75

## Sheet: Biochem at 22hr
ID	Kill nr	Letter	Litter	Group	Sex	Birth weight (g)	ALB (g/L)	TP (g/L )	ALP (U/L )	ALT (U/L )	total bilirubin (umol/L )	CK (U/L )	Cholesterol (mmol/L )	creatinin (umol/L )	IRON_2 (umol/L )	phosphat (mmol/L )	AST (U/L )	urea (mmol/L )	GGT (U/L )	CA (mmol/L )	MG (mmol/L )	Na (mmol/L )	K (mmol/L )	GLUH_3 (mmol/L )	C3 (ng/mL)
H1	111	H	1	HIGH-CON	M	1165	6.99	20.4	182	12	1	348	0.94	58	0	0.9	74	2.2	18	0	0.03	152.8	21.1	4.9	57.645
L1	113	L	1	HIGH-CON	F	1129
G2	135	G	2	HIGH-CON	f	1387	6.16	18.61	38	17	1	305	1.09	65	0	0.9	20	2.6	42	0	0.06	159.5	26.05	7.4	41.673
I2	132	I	2	HIGH-CON	m	1015.2	6.49	19.51	82	18	3	270	1.16	70	0	0.9	20	3.1	44	0	0.09	164	24.53	12.8	60.985
T2	138	T	2	HIGH-CON	m	1193	5.61	16.08	87	20	2	1341	1.03	91	0	1.1	249	3.9	35	0	0.05	150.6	37.01	40.8	47.313
K3	161	K	3	HIGH-CON	f	984																			56.212
Q3	165	Q	3	HIGH-CON	m	676	5.99	18.98	35	15	1	226	1.27	55	0	0.7	15	2.7	24	0	0.14	148.2	19.56	31.2	57.072
Æ3	163	Æ	3	HIGH-CON	f	908	6.73	20.78	45	14	2	361	1.18	95	0	0.8	57	4.3	29	0	0.09	153.8	24.58	18.9	44.26
B1	101	B	1	HIGH-SE	F	1222	4.7	12.68	175	10	1	113	0.82	103	0	1.7	16	3.1	33	0	0.09	147	25.56	11.9	109.627
F1	105	F	1	HIGH-SE	F	1038.5	4.24	10.76	763	23	0	1211	0.81	141	0	1.8	136	4.4	36	0	0.23	146.8	26.07	54.8	47.143
I1	107	I	1	HIGH-SE	M	1075	5.63	17.71	118	11	2	134	0.98	93	0	0.8	16	3.2	18	0	0.08	145.2	26.03	35	57.698
N1	102	N	1	HIGH-SE	M	1468	4.35	9.11	908	9	0	203	0.54	92	0	2.1	24	3.5	27	0	0.15	131.8	23.2		43.69
F2	119	F	2	HIGH-SE	m	1189	5.28	14.12	71	14	1	307	0.96	63	0	1.4	30	3	63	0	0.06	148	26.05	34	56.137
H2	999	H	2	HIGH-SE	m	1243
N2	115	N	2	HIGH-SE	m	791	5.63	13.05	110	15	0	408	1.16	80	0	3.1	30	3.4	56	0	0.17	160.6	24.39	37.6	60.961
Q2	124	Q	2	HIGH-SE	f	793.5	3.73	12.75	38	11	2	87	0.84	106	0	1.2	14	3.3	39	0	0.05	149	30.15	7.6	73.967
R2	118	R	2	HIGH-SE	f	1303	5.41	14.16	74	16	0	518	1.13	116	0	1.2	39	3.6	45	0	0.11	159.8	22.13	16.4	66.847
Y2	122	Y	2	HIGH-SE	m	1340.4	4.6	13.52	31	12	2	256	0.87	111	0	0.9	36	3.3	35	0	0.11	149	28.95	6.5	43.985
A3	150	A	3	HIGH-SE	f	725	5.11	9.41	90	15	1	1024	1.1	61	0	1.3	25	2.8	28	0	0.1	147.6	23.81	34	78.93
B3	143	B	3	HIGH-SE	f	794	6.91	7.66	113	16	0	343	1.22	73	0	2.2	25	3.3	42	0	0.1	145.5	27.61	37.3	64.227
D3	145	D	3	HIGH-SE	m	949.7	5.14	13.91	101	13	1	260	0.8	81	0	1.7	19	3.2	39	0	0.09	149.7	25.41	41.6	51.156
GAMMA3	148	GAMMA	3	HIGH-SE	m	1159	5.45	13.11	68	12	0	284	1.12	92	0	1.8	21	4.4	23	0	0.11	145.5	29.29	42.3	54.199
H3	146	H	3	HIGH-SE	f	1104	6.75	13.8	185	16	0	402	1.07	78	0	2.2	21	3.3	44	0	0.11	151	22.77	36.9	50.655
J3	155	J	3	HIGH-SE	m	885	4.75	16.35	92	12	0	146	0.98	130	0	1.3	18	4.3	32	0	0.08	143.2	26.49	57.2	41.43
K1	110	K	1	LOW-CON	M	1206.8	5.94	17.85	202	9	1	194	1.31	67	0	1.4	19	4.6	28	0	0.12	143.2	17.5	5	63.428
S1	112	S	1	LOW-CON	F	1004	7.42	21.47	66	15	4	255	1.73	60	0	1.3	22	3	32	0	0.08	152.7	26.86	3.9	60.516
L2	131	L	2	LOW-CON	m	1202.8	6.63	20.14	81	14	3	393	2.18	65	0	1.3	36	3.7	52	0	0.09	149.7	25.7	4.7	56.607
O2	134	O	2	LOW-CON	m	1031	6.11	17.87	55	12	2	300	1.54	66	0	1.2	35	5	33	0	0.09	146.2	23.74	3.9	60.907
Ø2	137	Ø	2	LOW-CON	f	1275	6.62	18.57	33	18	8	536	1.58	62	0	1	24	4.5	32	0	0.06	151.7	25.15	4.4	44.748
G3	164	G	3	LOW-CON	f	993	7.61	21.39	106	16	1	344	1.66	70	0	1.4	22	3.9	30	0	0.08	145.5	23.57	3.4	73.484
P3	999	P	3	LOW-CON	m	1279
R3	160	R	3	LOW-CON	m	637	7.19	21.15	98	14	1	226	1.81	68	0	1.4	27	4.6	25	0	0.05	146.3	32.3	3.4	44.92
X3	162	X	3	LOW-CON	f	828	7.32	20.36	89	38	1	3583	1.53	96	0	1.5	60	6.8	28	0	0.13	144.9	20.75	5.2	50.192
A1	999	A	1	LOW-IAIP	M	803
J1	100	J	1	LOW-IAIP	M	1324.5	6.22	0.81	638	0	0	890	1.08	97	0	2.1		3.9	43	0	0.18	143.1	24.97	1.7	51.24
M1	114	M	1	LOW-IAIP	F	1191	8.13	21.43	98	8	1	137	1.07	73	0	1.4	25	5.5	20	0	0.08	147.4	28.11	3.2	57.351
P1		P	1	LOW-IAIP	M	981
R1	104	R	1	LOW-IAIP	F	988.2	5.13	7.34	838	11	1	528	1.01	112	0	2	29	5.3	22	0	0.23	139.4	21.76	0	60.026
A2	117	A	2	LOW-IAIP	m	1210	6.8	6.95	46	10	0	206	1.2	67	0	1.8	18	3.5	35	0	0.06	156.6	23.32	2.7	59.223
B2	123	B	2	LOW-IAIP	f	1015	7.11	15.8	214	14	1	269	1.51	87	0	2	21	4.4	35	0	0.24	157.5	18.33	0.8	59.539
C2	126	C	2	LOW-IAIP	f	1210	7.29	19.38	71	18	7	415	1.78	60	0	1.9	31	2.9	55	0	0.07	143.3	33.67	4.4	49.704
J2	128	J	2	LOW-IAIP	f	678	6.7	20.24	101	13	1	187	1.15	55	0	1.1	13	3.5	34	0	0.09	151.7	27.5	2.3	69.147
M2	140	M	2	LOW-IAIP	m	1261	7.29	19.59	35	10	1	90	1.9	65	0	1.6	11	5.2	27	0	0.09	149.2	26.73	4.1	67.826
P2	129	P	2	LOW-IAIP	f	1098.7	7.11	17.68	14	17	1	235	1.54	55	0	1.8	44	3.4	48	0	0.08	141.1	64.52	8.3	81.312
S2	125	S	2	LOW-IAIP	m	1327	6.95	18.43	126	10	1	290	1.34	84	0	1.6	57	6	32	0	0.12	147.6	24.27	3	43.273
Z2	116	Z	2	LOW-IAIP	f	1270	6.56	9.34	57	16	0	1102	1.6	74	0	1.7	65	3.5	39	0	0.07	149.1	28.7	2.4	71.13
Æ2	120	Æ	2	LOW-IAIP	m	1180.8	7.42	9.51	41	15	0	294	1.36	106	0	1.1	42	4.8	38	0	0.09	152.4	24.33	3.5	58.947
ALPHA3	149	ALPHA	3	LOW-IAIP	m	847	7.76	5.24	71	18	0	424	1.14	74	0	1.7		3.5	40	0	0.11	148.7	27.3	1.7	58.222
BETA3	153	BETA	3	LOW-IAIP	m	777	6.65	18.64	156	11	1	274	0.97	75	0	1.5	25	4.3	30	0	0.09	143.4	26.5	2	68.722
I3	152	I	3	LOW-IAIP	f	996	6.03	9.83	146	11	1	275	0.8	67	0	2.2	18	4	33	0	0.05	141.9	23.4	2.4	56.063
L3	151	L	3	LOW-IAIP	m	1175	7.01	6.85	64	8	0	148	0.97	85	0	1.5	14	5.8	25	0	0.11	135.4	22.69	3	66.009
Ø3	154	Ø	3	LOW-IAIP	f	826	6.54	19.76	52	9	1	134	1.25	97	0	1.4	14	6	33	0	0.07	152.6	27.47	0.8	69.037
Å3	147	Å	3	LOW-IAIP	f	970	7.46	15.86	122	13	0	523	1.04	76	0	1.9	16	3.9	18	0	0.05	147.3	26.35	4.8	56.085
C1	109	C	1	LOW-PLACEBO	F	1065.9	8.06	21.79	407	10	1	128	1.32	93	0	0.9	18	4.5	29	0	0.1	149.6	20.64	1.3	56.413
D1		D	1	LOW-PLACEBO	F	1224
E1	108	E	1	LOW-PLACEBO	M	1174	7.18	20.08	79	11	3	195	1.44	72	0	1.4	17	4.8	18	0	0.07	147.5	26.37	3.1	47.313
G1	106	G	1	LOW-PLACEBO	F	932.1	7.92	19.39	492	13	2	601	1.38	115	0	1.5	64	5.6	25	0	0.11	146	25.91	0.9	55.595
O1	103	O	1	LOW-PLACEBO	M	1314.8	7.89	19.73	256	11	1	189	1.32	66	0	2.2	15	3.5	20	0	0.08	156.6	26.37	4.3	64.681
D2	136	D	2	LOW-PLACEBO	f	1041	8.8	23.22	141	10	1	98	1.61	114	0	1.4	36	6.3	34	0	0.12	152.5	25.51	3.4	46.785
E2	133	E	2	LOW-PLACEBO	f	1260.6	8.18	22.65	60	11	1	285	1.28	55	0	1.3	46	5.4	35	0	0.05	155.8	26.92	1.1	50.522
K2	141	K	2	LOW-PLACEBO	m	1405	7.2	19.77	86	9	1	146	1.46	82	0	1.4	19	5.4	38	0	0.1	150.1	25.31	2.3	76.928
U2	121	U	2	LOW-PLACEBO	m	741.5	4.72	3.2	324	11	0	253	1	74	0	2.3	20	3.7	34	0	0.09	124.2	40.82	4.5	38.323
V2	127	V	2	LOW-PLACEBO	m	1281	6.16	17.67	26	9	1	435	1.24	50	0	1.4	81	3.8	50	0	0.05	142.6	35.8	4.2	56.048
X2	139	X	2	LOW-PLACEBO	m	1111	5.92	16.37	110	11	2	150	1.62	63	0	1.2	20	3.8	31	0	0.13	137.1	23.79	4.7	65.886
Å2	130	Å	2	LOW-PLACEBO	m	902	7.74	22.05	82	12	2	75	1.55	71	0	1.2	18	5.6	63	0	0.08	152.5	27.71	2.9	54.697
N3	159	N	3	LOW-PLACEBO	m	1219	7.83	21.14	48	13	2	284	1.42	72	0	2.1	14	4.4	33	0	0.1	155.8	23.13	2.1	51.156
O3	157	O	3	LOW-PLACEBO	f	849	7.39	23.6	83	11	1	232	1.76	45	0	1.4	28	3	16	0	0.01	152.3	27.93	3.9
T3	144	T	3	LOW-PLACEBO	m	1017	7.05	9.42	153	9	0	327	1.2	87	0	2.1	28	4	37	0	0.07	151.6	23.26	4.6	61.7
U3	142	U	3	LOW-PLACEBO	f	909	6.18	0	96	10	0	153	1.02	97	0	1.4	18	4.4	24	0	0.09	144.7	23.56	2.5	75.459
V3	158	V	3	LOW-PLACEBO	f	795	7.41	20.65	24	12	1	247	1.56	59	0	1.8	24	4	29	0	0.13	148.2	23.45	4	54.601
Y3	156	Y	3	LOW-PLACEBO	f	702	7.06	21.86	154	13	0	237	1.42	90	0	1.4	55	5.2	37	0	0.01	151.9	38.37	3.2	48.997

## Sheet: ALTAST
Litter	Group	Sex	ALT (U/L )	AST (U/L )				statistics
1	High_CON	M	12	74					ALT (U/L )	AST (U/L )
1	High_CON	F						High_SE - High_CON == 0	0.421486	0.0358485
2	High_CON	f	17	20				Low_SE - High_SE == 0	0.129299	0.999976
2	High_CON	m	18	20				Low_SE - Low_CON == 0	0.000791221	1
2	High_CON	m	20	249				Low_CON - High_CON == 0	0.989693	0.069014
3	High_CON	f
3	High_CON	m	15	15
3	High_CON	f	14	57
1	High_SE	F	10	16
1	High_SE	F	23	136
1	High_SE	M	11	16
1	High_SE	M	9	24
2	High_SE	m	14	30
2	High_SE	m
2	High_SE	m	15	30
2	High_SE	f	11	14
2	High_SE	f	16	39
2	High_SE	m	12	36
3	High_SE	f	15	25
3	High_SE	f	16	25
3	High_SE	m	13	19
3	High_SE	m	12	21
3	High_SE	f	16	21
3	High_SE	m	12	18
1	Low_CON	M	9	19
1	Low_CON	F	15	22
2	Low_CON	m	14	36
2	Low_CON	m	12	35
2	Low_CON	f	18	24
3	Low_CON	f	16	22
3	Low_CON	m
3	Low_CON	m	14	27
3	Low_CON	f	38	60
1	Low_SE	F	10	18
1	Low_SE	F
1	Low_SE	M	11	17
1	Low_SE	F	13	64
1	Low_SE	M	11	15
2	Low_SE	f	10	36
2	Low_SE	f	11	46
2	Low_SE	m	9	19
2	Low_SE	m	11	20
2	Low_SE	m	9	81
2	Low_SE	m	11	20
2	Low_SE	m	12	18
3	Low_SE	m	13	14
3	Low_SE	f	11	28
3	Low_SE	m	9	28
3	Low_SE	f	10	18
3	Low_SE	f	12	24
3	Low_SE	f	13	55

## Sheet: Cytokines
ID	Kill nr	Letter	Litter	Group	Sex	IL10	TNFA	IL6	Time	StandardTime
A1	999	A	1	LOW-IAIP	M				3	3
B1	999	B	1	HIGH-SE	F	95.554	190.02	0	3	3
C1		C	1	LOW-PLACEBO	F	201.77	104.296	0	3	3
D1		D	1	LOW-PLACEBO	F				3	3
E1	108	E	1	LOW-PLACEBO	M	0	78.553	24.632	3	3
F1	105	F	1	HIGH-SE	F	194.444	74.583	50.041	3	3
G1	106	G	1	LOW-PLACEBO	F	24.77	130.646	133.194	3	3
H1	111	H	1	HIGH-CON	M	0	4.003	110.039	3	3
I1	107	I	1	HIGH-SE	M	94.364	154.566	0	3	3
J1		J	1	LOW-IAIP	M	156.331	119.323	74.515	3	3
K1		K	1	LOW-CON	M	0	9.786	0	3	3
L1	113	L	1	HIGH-CON	F	14.267	7.069	0	3	3
M1	114	M	1	LOW-IAIP	F	102.721	149.819	202.285	3	3
N1		N	1	HIGH-SE	M	0	184.896	86.636	3	3
O1		O	1	LOW-PLACEBO	M	57.862	130.076	0	3	3
P1		P	1	LOW-IAIP	M	132.17	119.592	197.117	3	3
R1	104	R	1	LOW-IAIP	F	101.003	60.339	126.877	3	3
S1	112	S	1	LOW-CON	F	56.364	7.5	0	3	3
A2	117	A	2	LOW-IAIP	m	114.488	116.884	211.577	3	3
B2	123	B	2	LOW-IAIP	f	196.933	61.746	86.422	3	3
C2	126	C	2	LOW-IAIP	f				3	3
D2	136	D	2	LOW-PLACEBO	f	55.573	86.913	40.846	3	3
E2	133	E	2	LOW-PLACEBO	f	119.438	81.709	31.506	3	3
F2	119	F	2	HIGH-SE	m	148.661	102.81	170.675	3	3
G2	135	G	2	HIGH-CON	f	26.598	14.787	20.941	3	3
H2	999	H	2	HIGH-SE	m				3	3
I2	132	I	2	HIGH-CON	m	0	13.651	32.312	3	3
J2	128	J	2	LOW-IAIP	f	263.337	71.795	119.299	3	3
K2	141	K	2	LOW-PLACEBO	m	161.588	77.984	62.469	3	3
L2	131	L	2	LOW-CON	m	0	10.138	47.823	3	3
M2	140	M	2	LOW-IAIP	m	95.024	75.737	70.376	3	3
N2	115	N	2	HIGH-SE	m	144.852	150.795	159.185	3	3
O2	134	O	2	LOW-CON	m	0	6.218	48.657	3	3
P2	129	P	2	LOW-IAIP	f	54.505	62.765	68.651	3	3
Q2	124	Q	2	HIGH-SE	f	46.655	59.131	15.887	3	3
R2	118	R	2	HIGH-SE	f	33.714	99.175	20.433	3	3
S2	125	S	2	LOW-IAIP	m	98.645	106.239	96.413	3	3
T2	138	T	2	HIGH-CON	m	0	37.712	76.457	3	3
U2	121	U	2	LOW-PLACEBO	m	79.978	67.042	117.564	3	3
V2	127	V	2	LOW-PLACEBO	m	101.97	54.068	65.401	3	3
X2	139	X	2	LOW-PLACEBO	m	87.889	93.254	70.189	3	3
Y2	122	Y	2	HIGH-SE	m	38.631	161.69	22.438	3	3
Z2	116	Z	2	LOW-IAIP	f	189.681	101.47	113.893	3	3
Æ2	120	Æ	2	LOW-IAIP	m	135.501	90.156	86.906	3	3
Ø2	137	Ø	2	LOW-CON	f	0	12.333	111.124	3	3
Å2	130	Å	2	LOW-PLACEBO	m	153.943	30.44	25.072	3	3
A3	150	A	3	HIGH-SE	f	234.5	145.4	50.529	3	3
ALPHA3	149	ALPHA	3	LOW-IAIP	m	291.076	192.685	145.692	3	3
B3	143	B	3	HIGH-SE	f	71.309	285.859	40.789	3	3
BETA3	153	BETA	3	LOW-IAIP	m	176.56	64.258	56.601	3	3
D3	145	D	3	HIGH-SE	m	132.538	83.754	1.075	3	3
G3	164	G	3	LOW-CON	f	26.325	0	31.189	3	3
GAMMA3	148	GAMMA	3	HIGH-SE	m	116.37	143.197	110.452	3	3
H3	146	H	3	HIGH-SE	f	183.257	236.897	83.668	3	3
I3	152	I	3	LOW-IAIP	f	292.535	72.789	87.885	3	3
J3	155	J	3	HIGH-SE	m	450.956	88.557	21.402	3	3
K3	161	K	3	HIGH-CON	f	0	0	20.092	3	3
L3	151	L	3	LOW-IAIP	m	116.418	397.427	206.658	3	3
N3	159	N	3	LOW-PLACEBO	m	167.696	132.233	44.337	3	3
O3	157	O	3	LOW-PLACEBO	f	115.388	41.145	20.362	3	3
P3		P	3	LOW-CON	m	72.43	0	88.519	3	3
Q3	165	Q	3	HIGH-CON	m	0	0	1.822	3	3
R3	160	R	3	LOW-CON	m	0	0	0	3	3
T3	144	T	3	LOW-PLACEBO	m	221.68	129.335	130.364	3	3
U3	142	U	3	LOW-PLACEBO	f	247.727	173.518	77.863	3	3
V3	158	V	3	LOW-PLACEBO	f	96.125	119.918	31.385	3	3
X3	162	X	3	LOW-CON	f	60.859	0	115.625	3	3
Y3	156	Y	3	LOW-PLACEBO	f	111.775	66.122	56.97	3	3
Æ3	163	Æ	3	HIGH-CON	f	0	7.344	6.125	3	3
Ø3	154	Ø	3	LOW-IAIP	f	280.633	125.824	137.349	3	3
Å3	147	Å	3	LOW-IAIP	f	328.163	98.698	46.845	3	3
A1	999	A	1	LOW-IAIP	M				6	6
B1	999	B	1	HIGH-SE	F	135.32	159.388	197.885	6	6
C1		C	1	LOW-PLACEBO	F	315.593	450.137	140.034	6	6
D1		D	1	LOW-PLACEBO	F				6	6
E1	108	E	1	LOW-PLACEBO	M	155.029	112.855	44.407	6	6
F1	105	F	1	HIGH-SE	F	107.066	107.276	130.115	6	6
G1	106	G	1	LOW-PLACEBO	F	84.06	175.753	158.473	6	6
H1	111	H	1	HIGH-CON	M	0	0	0	6	6
I1	107	I	1	HIGH-SE	M	188.951	173.312	228.722	6	6
J1		J	1	LOW-IAIP	M	255.936	110.752	173.603	6	6
K1		K	1	LOW-CON	M	0	0	0	6	6
L1	113	L	1	HIGH-CON	F	89.359	0	0	6	6
M1	114	M	1	LOW-IAIP	F	196.383	238.136	1123.66	6	6
N1		N	1	HIGH-SE	M	99.703	842.05	2204.82	6	6
O1		O	1	LOW-PLACEBO	M	222.165	92.148	78.711	6	6
P1		P	1	LOW-IAIP	M	291.457	303.753	2847.21	6	6
R1	104	R	1	LOW-IAIP	F	80.754	124.71	71.345	6	6
S1	112	S	1	LOW-CON	F	0	0	0	6	6
A2	117	A	2	LOW-IAIP	m	268.504	272.543	926.247	6	6
B2	123	B	2	LOW-IAIP	f	217.747	83.624	38.476	6	6
C2	126	C	2	LOW-IAIP	f	143.078	65.553	142.768	6	6
D2	136	D	2	LOW-PLACEBO	f	235.251	169.615	103.331	6	6
E2	133	E	2	LOW-PLACEBO	f	273.585	103.641	65.488	6	6
F2	119	F	2	HIGH-SE	m	249.811	282.815	761.179	6	6
G2	135	G	2	HIGH-CON	f	62.663	0	0	6	6
H2	999	H	2	HIGH-SE	m	514.646	434.079	834.471	6	6
I2	132	I	2	HIGH-CON	m	0	9.951	1.382	6	6
J2	128	J	2	LOW-IAIP	f	293.205	94.571	55.424	6	6
K2	141	K	2	LOW-PLACEBO	m	192.618	107.885	87.597	6	6
L2	131	L	2	LOW-CON	m	40.062	0	0	6	6
M2	140	M	2	LOW-IAIP	m	247.102	105.13	108.606	6	6
N2	115	N	2	HIGH-SE	m	385.787	383.02	1311.96	6	6
O2	134	O	2	LOW-CON	m	67.848	0	8.281	6	6
P2	129	P	2	LOW-IAIP	f	120.048	134.213	39.59	6	6
Q2	124	Q	2	HIGH-SE	f	258.045	112.944	214.824	6	6
R2	118	R	2	HIGH-SE	f	232.904	286.643	1212.3	6	6
S2	125	S	2	LOW-IAIP	m	166.498	204.162	227.413	6	6
T2	138	T	2	HIGH-CON	m	0	9.866	6.214	6	6
U2	121	U	2	LOW-PLACEBO	m	150.266	105.833	81.941	6	6
V2	127	V	2	LOW-PLACEBO	m	130.315	91.563	7.64	6	6
X2	139	X	2	LOW-PLACEBO	m	140.05	113.975	75.305	6	6
Y2	122	Y	2	HIGH-SE	m	224.077	178.19	316.274	6	6
Z2	116	Z	2	LOW-IAIP	f	249.841	276.496	657.679	6	6
Æ2	120	Æ	2	LOW-IAIP	m	273.252	351.948	255.085	6	6
Ø2	137	Ø	2	LOW-CON	f	239.823	0	101.334	6	6
Å2	130	Å	2	LOW-PLACEBO	m	170.707	49.009	13.026	6	6
A3	150	A	3	HIGH-SE	f	304.851	286.344	581.627	6	6
ALPHA3	149	ALPHA	3	LOW-IAIP	m	597.946	470.31	1318.99	6	6
B3	143	B	3	HIGH-SE	f	258.298	441.202	1257.34	6	6
BETA3	153	BETA	3	LOW-IAIP	m	234.869	124.801	30.319	6	6
D3	145	D	3	HIGH-SE	m	136.211	342.272	200.843	6	6
G3	164	G	3	LOW-CON	f	0	0	0	6	6
GAMMA3	148	GAMMA	3	HIGH-SE	m	208.672	696.889	1325.67	6	6
H3	146	H	3	HIGH-SE	f	375.302	556.047	1390.68	6	6
I3	152	I	3	LOW-IAIP	f	98.008	134.322	70.784	6	6
J3	155	J	3	HIGH-SE	m	441.262	274.631	369.787	6	6
K3	161	K	3	HIGH-CON	f	0	0	0	6	6
L3	151	L	3	LOW-IAIP	m	552.715	897.218	1632.65	6	6
N3	159	N	3	LOW-PLACEBO	m	258.975	135.694	151.543	6	6
O3	157	O	3	LOW-PLACEBO	f	90.844	68.186	0	6	6
P3		P	3	LOW-CON	m	7.479	0	0	6	6
Q3	165	Q	3	HIGH-CON	m	0	0	0	6	6
R3	160	R	3	LOW-CON	m	6.691	0	0	6	6
T3	144	T	3	LOW-PLACEBO	m	628.547	382	713.622	6	6
U3	142	U	3	LOW-PLACEBO	f	1020.84	1219.81	3956.45	6	6
V3	158	V	3	LOW-PLACEBO	f	148.714	181.14	82.254	6	6
X3	162	X	3	LOW-CON	f	457.022	0	0	6	6
Y3	156	Y	3	LOW-PLACEBO	f	289.764	73.517	9.822	6	6
Æ3	163	Æ	3	HIGH-CON	f	0	0	0	6	6
Ø3	154	Ø	3	LOW-IAIP	f	573.734	469.271	483.955	6	6
Å3	147	Å	3	LOW-IAIP	f	461.005	268.343	295.812	6	6
A1	999	A	1	LOW-IAIP	M				12	12
B1	999	B	1	HIGH-SE	F	42.426	140.539	3220.96	12
C1		C	1	LOW-PLACEBO	F	345.555	203.476	2526.85	12	12
D1		D	1	LOW-PLACEBO	F				12	12
E1	108	E	1	LOW-PLACEBO	M	144.293	314.616	3003.9	12	12
F1	105	F	1	HIGH-SE	F	30.197	0	1739.34	12	12
G1	106	G	1	LOW-PLACEBO	F	92.216	59.033	1329.54	12	12
H1	111	H	1	HIGH-CON	M	0	0	8.967	12	12
I1	107	I	1	HIGH-SE	M	56.554	42.866	1074.26	12	12
J1		J	1	LOW-IAIP	M	177.497	156.848	1885.73	12
K1		K	1	LOW-CON	M	45.853	0	53.636	12	12
L1	113	L	1	HIGH-CON	F	0	0	10.885	12	12
M1	114	M	1	LOW-IAIP	F	26.961	56.43	440.246	12	12
N1		N	1	HIGH-SE	M	113.219	169.874	5356.85	12	12
O1		O	1	LOW-PLACEBO	M	25.237	32.871	1101.2	12	12
P1		P	1	LOW-IAIP	M				12	12
R1	104	R	1	LOW-IAIP	F	38.369	183.856	1934.08	12	12
S1	112	S	1	LOW-CON	F	55.418	0	88.667	12	12
A2	117	A	2	LOW-IAIP	m	345.135	181.14	4378.17	12	12
B2	123	B	2	LOW-IAIP	f	123.257	416.484	1210.53	12	12
C2	126	C	2	LOW-IAIP	f	226.906	167.597	814.861	12	12
D2	136	D	2	LOW-PLACEBO	f	99.957	150.698	1189.08	12	12
E2	133	E	2	LOW-PLACEBO	f	127.799	109.754	134.736	12	12
F2	119	F	2	HIGH-SE	m	287.801	269.599	4988.99	12
G2	135	G	2	HIGH-CON	f	23.488	0	50.461	12	12
H2	999	H	2	HIGH-SE	m				12	12
I2	132	I	2	HIGH-CON	m	20.881	0	57.623	12	12
J2	128	J	2	LOW-IAIP	f	95.752	97.661	267.152	12	12
K2	141	K	2	LOW-PLACEBO	m	217.905	408.402	2503.85	12	12
L2	131	L	2	LOW-CON	m	317.15	0	273.645	12	12
M2	140	M	2	LOW-IAIP	m	152.488	219.648	464.769	12	12
N2	115	N	2	HIGH-SE	m	1167.44	264.178	6925.25	12	12
O2	134	O	2	LOW-CON	m	18.644	0	30.686	12	12
P2	129	P	2	LOW-IAIP	f	98.586	115.759	365.223	12	12
Q2	124	Q	2	HIGH-SE	f	178.117	88.379	382.018	12	12
R2	118	R	2	HIGH-SE	f	334.804	141.192	5861.5	12
S2	125	S	2	LOW-IAIP	m	273.614	294.804	2961.82	12	12
T2	138	T	2	HIGH-CON	m	4.456	0	56.199	12	12
U2	121	U	2	LOW-PLACEBO	m	134.361	388.107	2050.27	12	12
V2	127	V	2	LOW-PLACEBO	m	24.164	157.193	632.32	12	12
X2	139	X	2	LOW-PLACEBO	m	43.289	268.061	651.193	12	12
Y2	122	Y	2	HIGH-SE	m	85.642	157.976	2105.96	12	12
Z2	116	Z	2	LOW-IAIP	f	354.385	142.398	3600.94	12
Æ2	120	Æ	2	LOW-IAIP	m	190.666	223.015	1230.08	12
Ø2	137	Ø	2	LOW-CON	f	534.432	0	378.392	12	12
Å2	130	Å	2	LOW-PLACEBO	m	144.941	39.56	66.563	12	12
A3	150	A	3	HIGH-SE	f	431.118	275.165	3522.36	12
ALPHA3	149	ALPHA	3	LOW-IAIP	m	1137.85	329.881	3617.01	12
B3	143	B	3	HIGH-SE	f				12	12
BETA3	153	BETA	3	LOW-IAIP	m	261.499	255.612	833.601	12	12
D3	145	D	3	HIGH-SE	m	107.161	151.335	1932.61	12
G3	164	G	3	LOW-CON	f	41.513	0	63.097	12	12
GAMMA3	148	GAMMA	3	HIGH-SE	m	785.736	382.271	5506.13	12
H3	146	H	3	HIGH-SE	f	1344.36	389.773	5499.06	12	12
I3	152	I	3	LOW-IAIP	f	344.463	474.847	3495.18	12
J3	155	J	3	HIGH-SE	m	424.877	354.291	3725.34	12	12
K3	161	K	3	HIGH-CON	f	0	0	42.681	12	12
L3	151	L	3	LOW-IAIP	m	491.285	217.799	1824.78	12
N3	159	N	3	LOW-PLACEBO	m	168.227	216.489	586.67	12	12
O3	157	O	3	LOW-PLACEBO	f	370.332	70.949	128.86	12	12
P3		P	3	LOW-CON	m	69.811	0	80.636	12	12
Q3	165	Q	3	HIGH-CON	m	0	0	56.837	12	12
R3	160	R	3	LOW-CON	m	37.228	0	52.005	12	12
T3	144	T	3	LOW-PLACEBO	m				12	12
U3	142	U	3	LOW-PLACEBO	f				12	12
V3	158	V	3	LOW-PLACEBO	f	210.019	389.951	1421.39	12	12
X3	162	X	3	LOW-CON	f	5.918	0	72.212	12	12
Y3	156	Y	3	LOW-PLACEBO	f	990.704	125.62	269.039	12	12
Æ3	163	Æ	3	HIGH-CON	f	0	0	58.056	12	12
Ø3	154	Ø	3	LOW-IAIP	f	980.059	356.226	1758.81	12	12
Å3	147	Å	3	LOW-IAIP	f	333.343	221.809	727.252	12
A1	999	A	1	LOW-IAIP	M				22	22
B1	101	B	1	HIGH-SE	F	50.267	53.673	1033.08	22	12
C1	109	C	1	LOW-PLACEBO	F	1.002	207.64	401.053	22	22
E1	108	E	1	LOW-PLACEBO	M	22.5	132.238	442.704	22	22
F1	105	F	1	HIGH-SE	F	45.188	1976.79	6305.94	22	22
G1	106	G	1	LOW-PLACEBO	F	2.822	26.853	449.319	22	22
H1	111	H	1	HIGH-CON	M	0	0	0	22	22
I1	107	I	1	HIGH-SE	M	5.66	90.431	171.832	22	22
J1	100	J	1	LOW-IAIP	M	16.467	299.062	4147.83	22	12
K1	110	K	1	LOW-CON	M	0	0	0	22	22
L1	113	L	1	HIGH-CON	F	0	7.747	0	22	22
M1	114	M	1	LOW-IAIP	F	3.644	224.08	201.425	22	22
N1	102	N	1	HIGH-SE	M	17.062	875.302	7713.88	22	22
O1	103	O	1	LOW-PLACEBO	M	5.061	23.749	173.247	22	22
P1		P	1	LOW-IAIP	M				22	22
R1	104	R	1	LOW-IAIP	F	31.482	151.872	3591.8	22	22
S1	112	S	1	LOW-CON	F	0	0	0	22	22
A2	117	A	2	LOW-IAIP	m	23.908	275.534	2765.08	22	22
B2	123	B	2	LOW-IAIP	f	4.328	454.903	619.894	22	22
C2	126	C	2	LOW-IAIP	f	23.208	278.371	1457.82	22	22
D2	136	D	2	LOW-PLACEBO	f	6.115	30.558	0	22	22
E2	133	E	2	LOW-PLACEBO	f	6.132	280.851	199.054	22	22
F2	119	F	2	HIGH-SE	m	19.961	211.126	4435.4	22	12
G2	135	G	2	HIGH-CON	f	0	10.908	0	22	22
H2	999	H	2	HIGH-SE	m				22	22
I2	132	I	2	HIGH-CON	m	0	0	0	22	22
J2	128	J	2	LOW-IAIP	f	4.243	53.962	94.681	22	22
K2	141	K	2	LOW-PLACEBO	m	22.119	54.237	181.174	22	22
L2	131	L	2	LOW-CON	m	0	0	0	22	22
M2	140	M	2	LOW-IAIP	m	8.309	33.113	96.965	22	22
N2	115	N	2	HIGH-SE	m	11.096	1351.59	6418.87	22	22
O2	134	O	2	LOW-CON	m	0	0	0	22	22
P2	129	P	2	LOW-IAIP	f	5.325	44.748	265.695	22	22
Q2	124	Q	2	HIGH-SE	f	19.133	5719.09	3780.56	22	22
R2	118	R	2	HIGH-SE	f	25.135	637.937	5581.46	22	12
S2	125	S	2	LOW-IAIP	m	23.387	441.549	736.01	22	22
T2	138	T	2	HIGH-CON	m	0	3.937	0	22	22
U2	121	U	2	LOW-PLACEBO	m	6.146	984.118	4373.42	22	22
V2	127	V	2	LOW-PLACEBO	m	10.317	27.807	289.446	22	22
X2	139	X	2	LOW-PLACEBO	m	12.617	15.816	198.424	22	22
Y2	122	Y	2	HIGH-SE	m	29.903	967.884	2328.88	22	22
Z2	116	Z	2	LOW-IAIP	f	6.519	259.383	2719.31	22	12
Æ2	120	Æ	2	LOW-IAIP	m	13.47	169.347	589.917	22	12
Ø2	137	Ø	2	LOW-CON	f	0	14.323	0	22	22
Å2	130	Å	2	LOW-PLACEBO	m	5.861	107.356	0	22	22
A3	150	A	3	HIGH-SE	f	41.454	255.563	2536.35	22	12
ALPHA3	149	ALPHA	3	LOW-IAIP	m	52.1	507.233	3140.64	22	12
B3	143	B	3	HIGH-SE	f	28.845	1529.09	3998.92	22	22
BETA3	153	BETA	3	LOW-IAIP	m	9.78	40.091	238.242	22	22
D3	145	D	3	HIGH-SE	m	41.454	272.34	2127.37	22	12
G3	164	G	3	LOW-CON	f	0	0	0	22	22
GAMMA3	148	GAMMA	3	HIGH-SE	m	11.064	851.958	5700.16	22	12
H3	146	H	3	HIGH-SE	f	64.331	644.804	5794.7	22	22
I3	152	I	3	LOW-IAIP	f	2.998	50.884	1387.06	22	12
J3	155	J	3	HIGH-SE	m	121.478	529.185	5952.95	22	22
K3	161	K	3	HIGH-CON	f	1.7	0	0	22	22
L3	151	L	3	LOW-IAIP	m	32.877	129.421	423.712	22	12
N3	159	N	3	LOW-PLACEBO	m	2.947	470.843	369.261	22	22
O3	157	O	3	LOW-PLACEBO	f	3.608	0	0	22	22
P3	999	P	3	LOW-CON	m				22	22
Q3	165	Q	3	HIGH-CON	m	0	166.863	67.935	22	22
R3	160	R	3	LOW-CON	m	0	0	0	22	22
T3	144	T	3	LOW-PLACEBO	m	25.971	408.146	4499.23	22	22
U3	142	U	3	LOW-PLACEBO	f	71.853	463.701	2481.09	22	22
V3	158	V	3	LOW-PLACEBO	f	0.078	0	235.374	22	22
X3	162	X	3	LOW-CON	f	0	0	0	22	22
Y3	156	Y	3	LOW-PLACEBO	f	7.795	0	0.534	22	22
Æ3	163	Æ	3	HIGH-CON	f	0.215	0	0	22	22
Ø3	154	Ø	3	LOW-IAIP	f	5.397	79.45	862.271	22	22
Å3	147	Å	3	LOW-IAIP	f	43.115	169.545	353.218	22	12

## Sheet: Bacteriology+Glucose
Litter	ID	Letter	Group	Sex	Birthweight	Time	Glucose	Bacteriology
1	B1	B	High	F		3	11.2	35000
1	F1	F	High	F		3	15.1	50000
1	I1	I	High	M		3	9.6	32500
1	N1	N	High	M		3	17.4	27500
1	H1	H	High CON	M		3	7.5
1	L1	L	High CON	F		3	8.7
1	C1	C	Low	F		3	1.9	22500
1	E1	E	Low	M		3	2.7	750
1	G1	G	Low	F		3	2.4	10500
1	O1	O	Low	M		3	2.1	6666.67
1	K1	K	Low CON	M		3	3.1
1	S1	S	Low CON	F		3	2
1	J1	J	Low IAIP	M		3	3.2	1333.33
1	M1	M	Low IAIP	F		3	2.8	25000
1	P1	P	Low IAIP	M		3	4.8	200000
1	R1	R	Low IAIP	F		3	2.4
2	F2	F	High	M	1189	3	17.4	133333
2	H2	H	High	M	1243	3	28	150000
2	N2	N	High	M	791	3	10.2	133333
2	Q2	Q	High	F	793.5	3	8.3	20000
2	R2	R	High	F	1303	3	9.5	23333.3
2	Y2	Y	High	M	1340.4	3	9.8	20000
2	G2	G	High CON	F	1387	3	18
2	I2	I	High CON	M	1015.2	3	21
2	T2	T	High CON	M	1193	3	14.5
2	Å2	Å	Low	M	902	3	1.8	1166.67
2	D2	D	Low	F	1041	3	3	1666.67
2	E2	E	Low	F	1260.6	3	2.2
2	K2	K	Low	M	1405	3	2.4	2000
2	U2	U	Low	M	741.5	3	1.9	8333.33
2	V2	V	Low	M	1281	3	4.3	833.333
2	X2	X	Low	M	1111	3	3.3	833.333
2	L2	L	Low CON	M	1202.8	3	2.6
2	O2	O	Low CON	M	1031	3	2.3
2	Ø2	Ø	Low CON	F	1275	3	2.7
2	A2	A	Low IAIP	M	1210	3	1.9	12500
2	Æ2	Æ	Low IAIP	M	1180.8	3	2.2	21666.7
2	B2	B	Low IAIP	F	1015	3	2.1	1000
2	C2	C	Low IAIP	F	1210	3	1.8	1166.67
2	J2	J	Low IAIP	F	678	3	1.9	13333.3
2	M2	M	Low IAIP	M	1261	3	2.7	1500
2	P2	P	Low IAIP	F	1098.7	3	2.5	666.667
2	S2	S	Low IAIP	M	1327	3	2.5	68333.3
2	Z2	Z	Low IAIP	F	1270	3	5.8	58333.3
3	A3	A	High	F	725	3	20.1	55000
3	B3	B	High	F	794	3	15.3	38333.3
3	D3	D	High	M	949.7	3	21.8	50000
3	GAMMA3	GAMMA	High	M	1159	3	11.2	133333
3	H3	H	High	F	1104	3	20.4	166667
3	J3	J	High	M	885	3	14.8	116667
3	Æ3	Æ	High CON	F	908	3	16
3	K3	K	High CON	F	984	3	18.3
3	Q3	Q	High CON	M	676	3	18.2
3	N3	N	Low	M	1219	3	2.9	2833.33
3	O3	O	Low	F	849	3	2.5
3	T3	T	Low	M	1017	3	2.8	183333
3	U3	U	Low	F	909	3	2.7	400000
3	V3	V	Low	F	795	3	2.2	13333.3
3	Y3	Y	Low	F	702	3	2.1	1500
3	G3	G	Low CON	F	993	3	2.8
3	P3	P	Low CON	M	1279	3	4.3
3	R3	R	Low CON	M	637	3	2.2
3	X3	X	Low CON	F	828	3	3.8
3	Å3	Å	Low IAIP	F	970	3	4.2	150000
3	ALPHA3	ALPHA	Low IAIP	M	847	3	3.4	50000
3	BETA3	BETA	Low IAIP	M	777	3	1.7	10000
3	I3	I	Low IAIP	F	996	3	3.1	833.333
3	L3	L	Low IAIP	M	1175	3	2.9	166667
3	Ø3	Ø	Low IAIP	F	826	3	2.1	91666.7
1	B1	B	High	F		6	9.3	20000
1	F1	F	High	F		6	9.8	17500
1	I1	I	High	M		6	10.4	15000
1	N1	N	High	M		6	14.8	25000
1	H1	H	High CON	M		6	7
1	L1	L	High CON	F		6	10.2
1	C1	C	Low	F		6	2.1	47500
1	E1	E	Low	M		6	3.1	1750
1	G1	G	Low	F		6	1.7	21666.7
1	O1	O	Low	M		6	1.8	11666.7
1	K1	K	Low CON	M		6	2.2
1	S1	S	Low CON	F		6	1.7
1	J1	J	Low IAIP	M		6	2	22500
1	M1	M	Low IAIP	F		6	2.8	40000
1	P1	P	Low IAIP	M		6		233333
1	R1	R	Low IAIP	F		6	3.4	31666.7
2	F2	F	High	M	1189	6	14.7	116667
2	H2	H	High	M	1243	6		71666.7
2	N2	N	High	M	791	6	14.9	116667
2	Q2	Q	High	F	793.5	6	7.2	18333.3
2	R2	R	High	F	1303	6	5.6	36666.7
2	Y2	Y	High	M	1340.4	6	6.8	28333.3
2	G2	G	High CON	F	1387	6	17.5
2	I2	I	High CON	M	1015.2	6	14.9
2	T2	T	High CON	M	1193	6	14.6
2	Å2	Å	Low	M	902	6	3.3	8333.33
2	D2	D	Low	F	1041	6	2.9	11666.7
2	E2	E	Low	F	1260.6	6	2.5	18333.3
2	K2	K	Low	M	1405	6	2.6	15000
2	U2	U	Low	M	741.5	6	2.9	38333.3
2	V2	V	Low	M	1281	6	4.4	13333.3
2	X2	X	Low	M	1111	6	2.7	8333.33
2	L2	L	Low CON	M	1202.8	6	2.3
2	O2	O	Low CON	M	1031	6	2.4
2	Ø2	Ø	Low CON	F	1275	6	2.3
2	A2	A	Low IAIP	M	1210	6	1.8	18333.3
2	Æ2	Æ	Low IAIP	M	1180.8	6	2.1	41666.7
2	B2	B	Low IAIP	F	1015	6	2.7	4000
2	C2	C	Low IAIP	F	1210	6	3.2	666.667
2	J2	J	Low IAIP	F	678	6	1.5	35000
2	M2	M	Low IAIP	M	1261	6	2.8	4500
2	P2	P	Low IAIP	F	1098.7	6	2.4	5333.33
2	S2	S	Low IAIP	M	1327	6	2.9	76666.7
2	Z2	Z	Low IAIP	F	1270	6	1.9	43333.3
3	A3	A	High	F	725	6	19.2	55000
3	B3	B	High	F	794	6	21.1	83333.3
3	D3	D	High	M	949.7	6	21	56666.7
3	GAMMA3	GAMMA	High	M	1159	6	12.8	83333.3
3	H3	H	High	F	1104	6	20.3	150000
3	J3	J	High	M	885	6	13	91666.7
3	Æ3	Æ	High CON	F	908	6	16.8
3	K3	K	High CON	F	984	6	19.3
3	Q3	Q	High CON	M	676	6	15
3	N3	N	Low	M	1219	6	3.4	13333.3
3	O3	O	Low	F	849	6	3.3
3	T3	T	Low	M	1017	6	3.8	121667
3	U3	U	Low	F	909	6	3.6	133333
3	V3	V	Low	F	795	6	2.9	23333.3
3	Y3	Y	Low	F	702	6	2.3	18333.3
3	G3	G	Low CON	F	993	6	2.7
3	P3	P	Low CON	M	1279	6	3.1
3	R3	R	Low CON	M	637	6	2.2
3	X3	X	Low CON	F	828	6	2.4
3	Å3	Å	Low IAIP	F	970	6	3	58333.3
3	ALPHA3	ALPHA	Low IAIP	M	847	6	2.8	48333.3
3	BETA3	BETA	Low IAIP	M	777	6	2	31666.7
3	I3	I	Low IAIP	F	996	6	3.4	36666.7
3	L3	L	Low IAIP	M	1175	6	2.3	93333.3
3	Ø3	Ø	Low IAIP	F	826	6	2.4	83333.3
1	B1	B	High	F		12	4.2	4000
1	F1	F	High	F		12	31.2	13333.3
1	I1	I	High	M		12	12.3	4250
1	N1	N	High	M		12	28	60000
1	H1	H	High CON	M		12	7.8
1	L1	L	High CON	F		12	9.6
1	C1	C	Low	F		12	2.1	5833.33
1	E1	E	Low	M		12	3.7	3833.33
1	G1	G	Low	F		12	2.6	5833.33
1	O1	O	Low	M		12	4.8	9000
1	K1	K	Low CON	M		12	2.9
1	S1	S	Low CON	F		12	2.7
1	J1	J	Low IAIP	M		12	7.5	8500
1	M1	M	Low IAIP	F		12	2.3	7000
1	P1	P	Low IAIP	M		12
1	R1	R	Low IAIP	F		12	2.8	11000
2	F2	F	High	M	1189	12	25.2	48333.3
2	H2	H	High	M	1243	12	35
2	N2	N	High	M	791	12	25.7	133333
2	Q2	Q	High	F	793.5	12	6.5	8833.33
2	R2	R	High	F	1303	12	12.7	100000
2	Y2	Y	High	M	1340.4	12	6.8	150000
2	G2	G	High CON	F	1387	12	14.4
2	I2	I	High CON	M	1015.2	12	11.3
2	T2	T	High CON	M	1193	12	20.1
2	Å2	Å	Low	M	902	12	2.8	8333.33
2	D2	D	Low	F	1041	12	3.3	2666.67
2	E2	E	Low	F	1260.6	12	2.2	3333.33
2	K2	K	Low	M	1405	12	1.9	8333.33
2	U2	U	Low	M	741.5	12	2.7	18333.3
2	V2	V	Low	M	1281	12	4.3	13333.3
2	X2	X	Low	M	1111	12	3.1	833.333
2	L2	L	Low CON	M	1202.8	12	3.5
2	O2	O	Low CON	M	1031	12	4
2	Ø2	Ø	Low CON	F	1275	12	3.9
2	A2	A	Low IAIP	M	1210	12	2.3	100000
2	Æ2	Æ	Low IAIP	M	1180.8	12	4.6	30000
2	B2	B	Low IAIP	F	1015	12	3.4	7333.33
2	C2	C	Low IAIP	F	1210	12	3.4	35000
2	J2	J	Low IAIP	F	678	12	1.7	8500
2	M2	M	Low IAIP	M	1261	12	3.9	10000
2	P2	P	Low IAIP	F	1098.7	12	2.9
2	S2	S	Low IAIP	M	1327	12	2.6	23333.3
2	Z2	Z	Low IAIP	F	1270	12	1.9	8500
3	A3	A	High	F	725	12	26.2	25000
3	B3	B	High	F	794	12		50000
3	D3	D	High	M	949.7	12	32.9	53333.3
3	GAMMA3	GAMMA	High	M	1159	12	27.6	68333.3
3	H3	H	High	F	1104	12	35	475000
3	J3	J	High	M	885	12	28	1.86667e+06
3	Æ3	Æ	High CON	F	908	12	15
3	K3	K	High CON	F	984	12	21
3	Q3	Q	High CON	M	676	12	18.3
3	N3	N	Low	M	1219	12	4.4	166667
3	O3	O	Low	F	849	12	3.4
3	T3	T	Low	M	1017	12		48333.3
3	U3	U	Low	F	909	12		53333.3
3	V3	V	Low	F	795	12	2.7	10000
3	Y3	Y	Low	F	702	12	1.5	1000
3	G3	G	Low CON	F	993	12	3.6
3	P3	P	Low CON	M	1279	12	4.8
3	R3	R	Low CON	M	637	12	3.8
3	X3	X	Low CON	F	828	12	5.2
3	Å3	Å	Low IAIP	F	970	12	4.1	20000
3	ALPHA3	ALPHA	Low IAIP	M	847	12	2.6	31666.7
3	BETA3	BETA	Low IAIP	M	777	12	3.9	26666.7
3	I3	I	Low IAIP	F	996	12	1.5	20000
3	L3	L	Low IAIP	M	1175	12	2.3	38333.3
3	Ø3	Ø	Low IAIP	F	826	12	3.3	48333.3
1	B1	B	High	F		22
1	F1	F	High	F		22		350000
1	I1	I	High	M		22	35	40000
1	N1	N	High	M		22
1	H1	H	High CON	M		22	8	0
1	L1	L	High CON	F		22	9.5	0
1	C1	C	Low	F		22	2.7	750
1	E1	E	Low	M		22	3.8	1000
1	G1	G	Low	F		22	1.8	5833.33
1	O1	O	Low	M		22		1000
1	K1	K	Low CON	M		22	5.7	0
1	S1	S	Low CON	F		22	4	0
1	J1	J	Low IAIP	M		22
1	M1	M	Low IAIP	F		22	3.4	2000
1	P1	P	Low IAIP	M		22
1	R1	R	Low IAIP	F		22		30000
2	F2	F	High	M	1189	22
2	H2	H	High	M	1243	22
2	N2	N	High	M	791	22
2	Q2	Q	High	F	793.5	22	7.3	25000
2	R2	R	High	F	1303	22
2	Y2	Y	High	M	1340.4	22	8.5	316667
2	G2	G	High CON	F	1387	22	9.9	0
2	I2	I	High CON	M	1015.2	22	11.6	0
2	T2	T	High CON	M	1193	22	35
2	Å2	Å	Low	M	902	22	3	1000
2	D2	D	Low	F	1041	22	3.4
2	E2	E	Low	F	1260.6	22	2.1	50
2	K2	K	Low	M	1405	22	3.4	3666.67
2	U2	U	Low	M	741.5	22		40000
2	V2	V	Low	M	1281	22	4.7	17500
2	X2	X	Low	M	1111	22	4.7	2833.33
2	L2	L	Low CON	M	1202.8	22	3.6	0
2	O2	O	Low CON	M	1031	22	3.6	0
2	Ø2	Ø	Low CON	F	1275	22	3.5	0
2	A2	A	Low IAIP	M	1210	22
2	Æ2	Æ	Low IAIP	M	1180.8	22
2	B2	B	Low IAIP	F	1015	22	1.8	8166.67
2	C2	C	Low IAIP	F	1210	22	3.8	11666.7
2	J2	J	Low IAIP	F	678	22	2.9	28333.3
2	M2	M	Low IAIP	M	1261	22	4.3	3000
2	P2	P	Low IAIP	F	1098.7	22	6.3	40000
2	S2	S	Low IAIP	M	1327	22	3.5	35000
2	Z2	Z	Low IAIP	F	1270	22
3	A3	A	High	F	725	22		68333.3
3	B3	B	High	F	794	22
3	D3	D	High	M	949.7	22
3	GAMMA3	GAMMA	High	M	1159	22		200000
3	H3	H	High	F	1104	22
3	J3	J	High	M	885	22	35	816667
3	Æ3	Æ	High CON	F	908	22	18.3
3	K3	K	High CON	F	984	22	26.2
3	Q3	Q	High CON	M	676	22	31.4
3	N3	N	Low	M	1219	22	1.9	138333
3	O3	O	Low	F	849	22	3.6
3	T3	T	Low	M	1017	22
3	U3	U	Low	F	909	22
3	V3	V	Low	F	795	22	4.2	0
3	Y3	Y	Low	F	702	22	3.8	0
3	G3	G	Low CON	F	993	22	3.3
3	P3	P	Low CON	M	1279	22
3	R3	R	Low CON	M	637	22	3.5
3	X3	X	Low CON	F	828	22	5
3	Å3	Å	Low IAIP	F	970	22		18333.3
3	ALPHA3	ALPHA	Low IAIP	M	847	22		10000
3	BETA3	BETA	Low IAIP	M	777	22	2.2	1500
3	I3	I	Low IAIP	F	996	22		2000
3	L3	L	Low IAIP	M	1175	22		35000
3	Ø3	Ø	Low IAIP	F	826	22	31.4	833.333
